# Supplementary material for: Multi-omics characterisation of Daphnia magna exposed to PFAS and microplastics: transcriptome and gut microbiome datasets
Source: Research Square preprint supplement (doi:10.21203/rs.3.rs-7840812/v1), 2025-11-13

**Multi-omics characterisation of *Daphnia magna* exposed to PFAS and microplastics: transcriptome and gut microbiome datasets**

Muhammad Abdullahi1, Sam Benktwitz-Bedford1, Tayebeh Soltanighias1, Abubakar Umar2,Luisa Orsini1

**Affiliations**

1School of Biosciences and Centre for Environmental Research and Justice (CERJ), University of Birmingham, Birmingham, UK

2School of Geography, Earth & Environmental Sciences, University of Birmingham, Birmingham, UK

Corresponding author(s): Luisa Orsini (l.orsini@bham.ac.uk)

**Supplementary table and figures**

**Supplementary Table 1. Gene read counts by day, treatment, and replicate.** Read counts for all genes identified in the dataset, separated by sampling day, treatment, and replicate. *Tab 1* contains data for genotype LRV0_1; *Tab 2* contains data for genotype LRII36_01.

*See Abdullahi et al. Supplementary Table 1*

**Supplementary Table 2. ASV counts by day, treatment, and replicate.** Counts for all ASV in the dataset, separated by sampling day, treatment, and replicate. *Tab 1* contains data for genotype LRV0_1; *Tab 2* contains data for genotype LRII36_01.

*See Abdullahi et al. Supplementary Table 2*

**Figure S1. Principal Component Analysis (PCA) by treatment and sampling day for the *Daphnia* transcriptome.** PCA plots are shown separately for each exposure condition (PFOS, PFOA, PET, PFOS+PFOA, PFOS+PET, PFOA+PET, PFOS+PFOA+PET) and treatment day, including both genotypes—*LRV0_1* (black) and *LRII36_1* (red)—with their biological replicates. Control samples are represented by open symbols, while treated samples are represented by filled symbols.


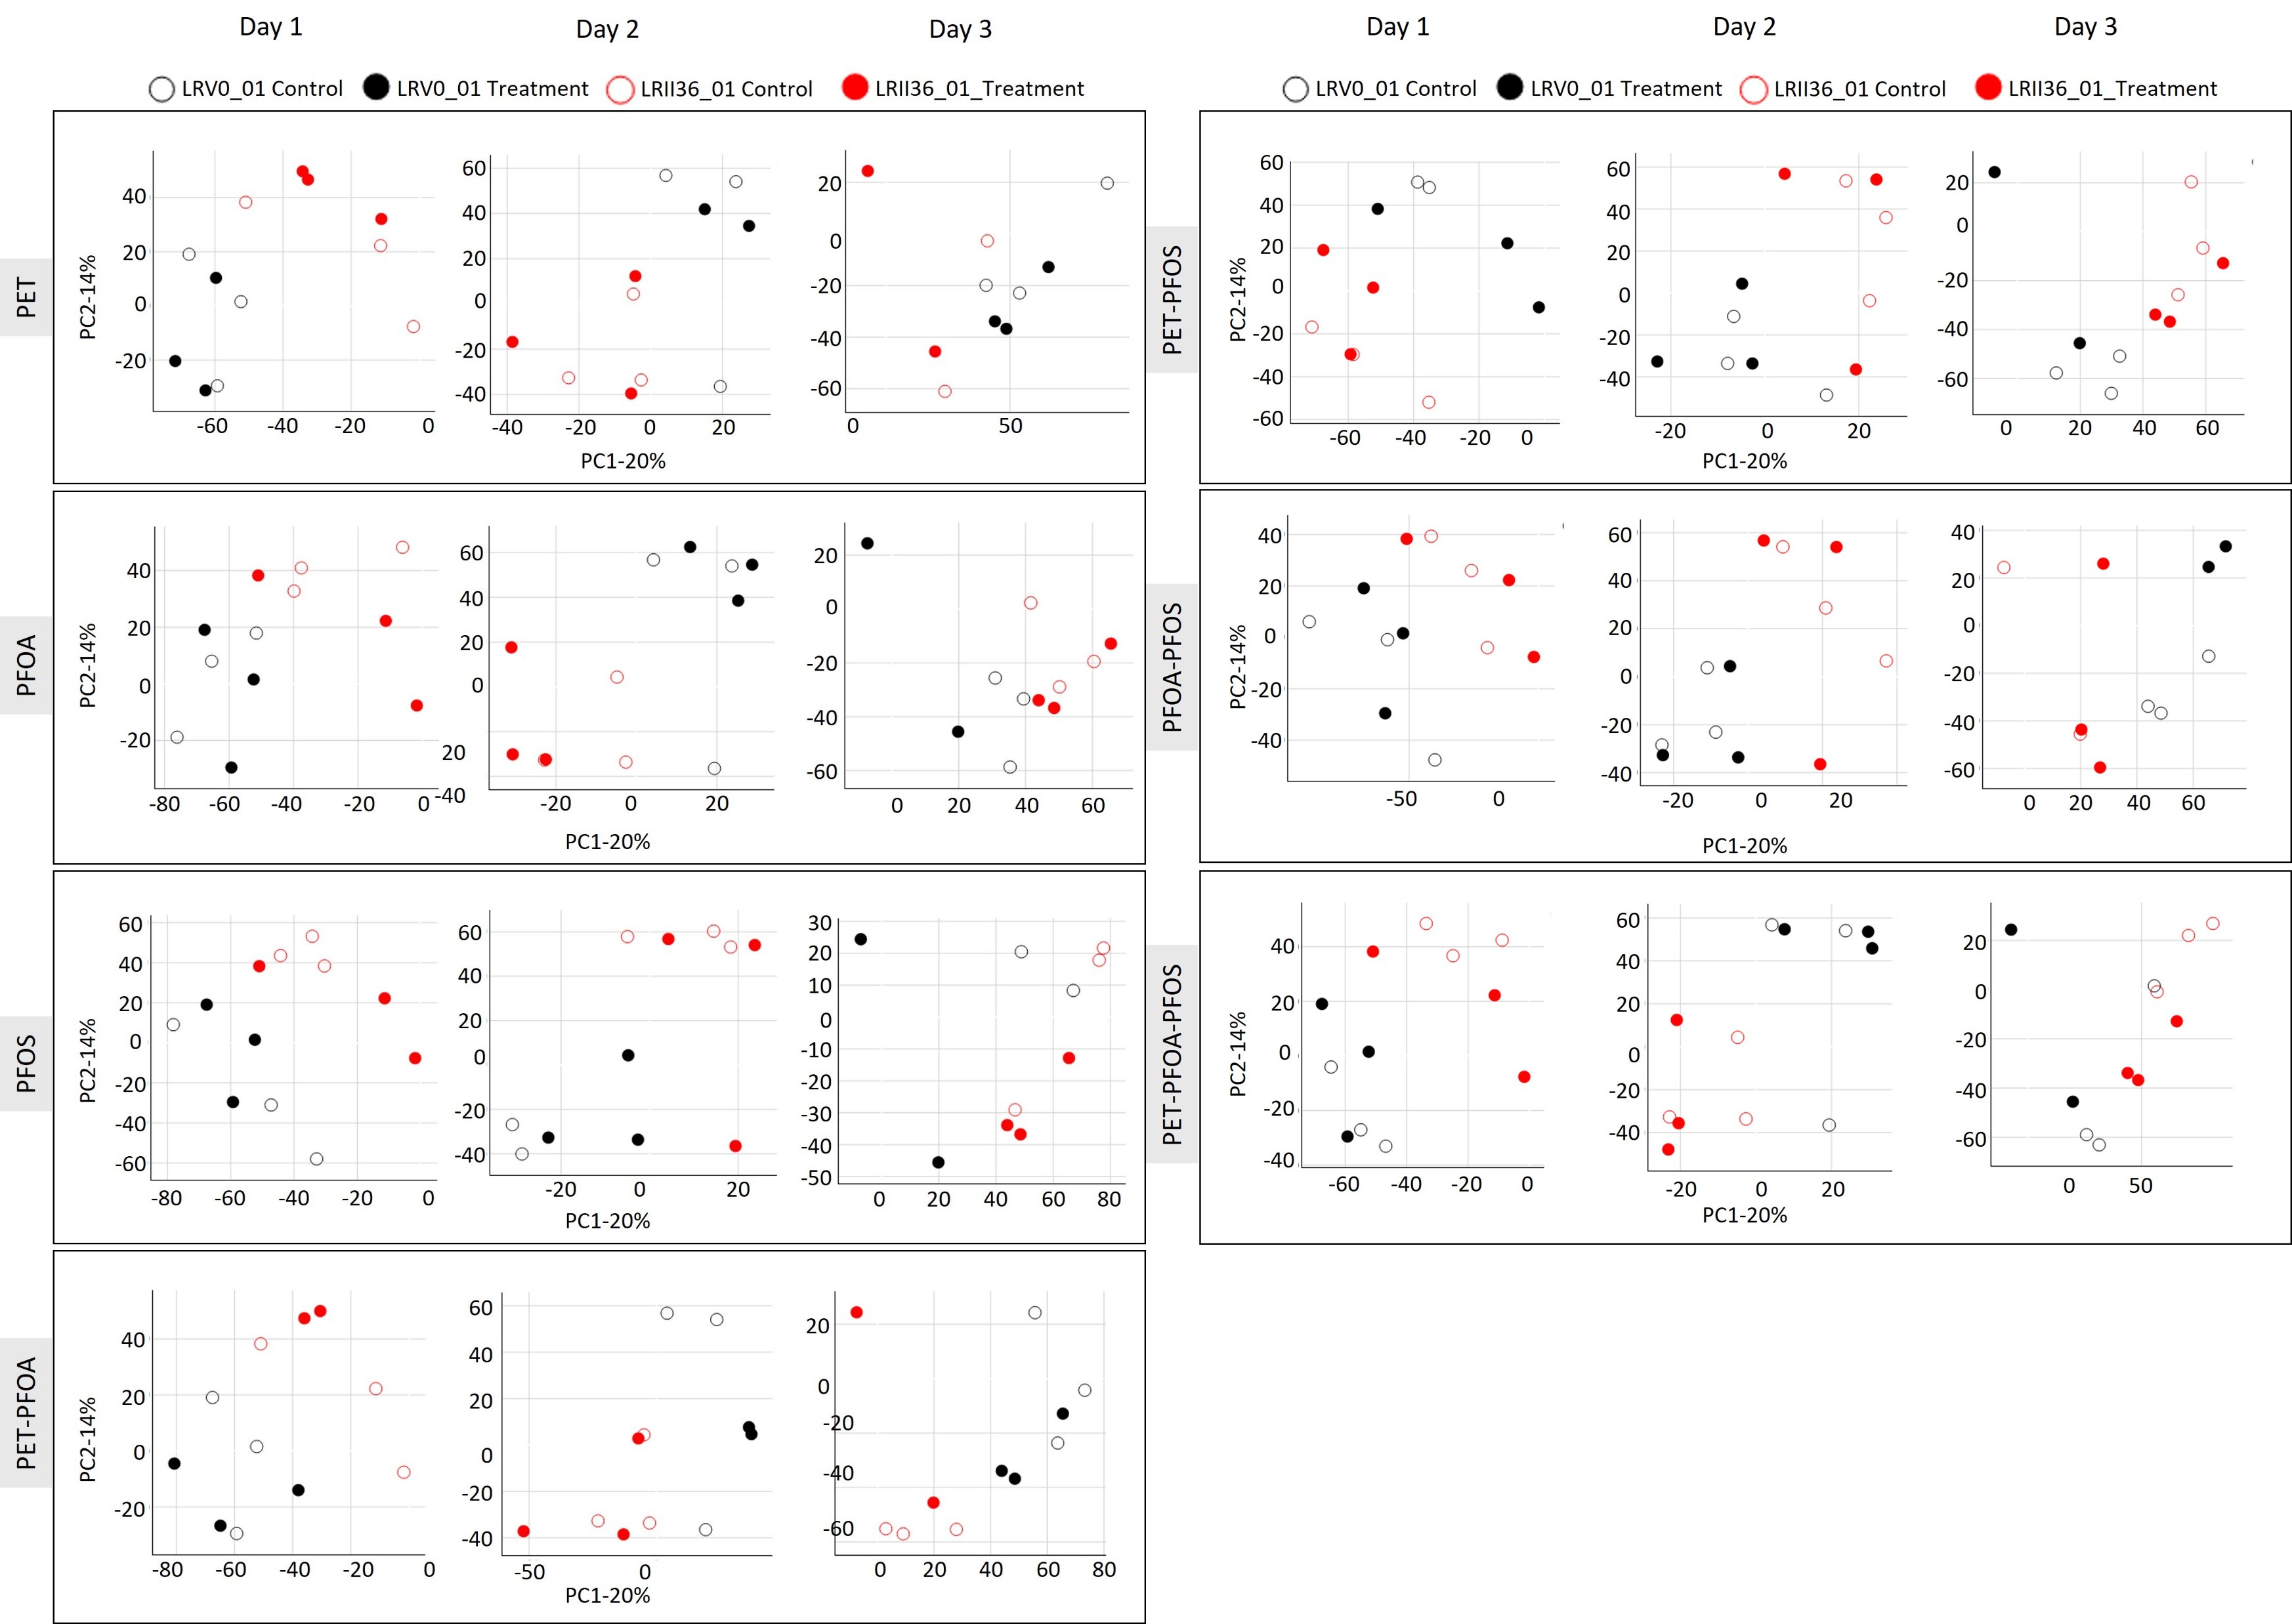


**Figure S2.** **Alpha diversity**. Alpha diversity between control (shaded pattern) and treatment (solid patterns) of the two *D. magna* genotypes—*LRV0_1* (black) and *LRII36_01* (red)—shown with their biological replicates, displayed by treatment and day.The paired Wilcoxon tests (P<0.05) was non-significant for all pairwise comparisons.


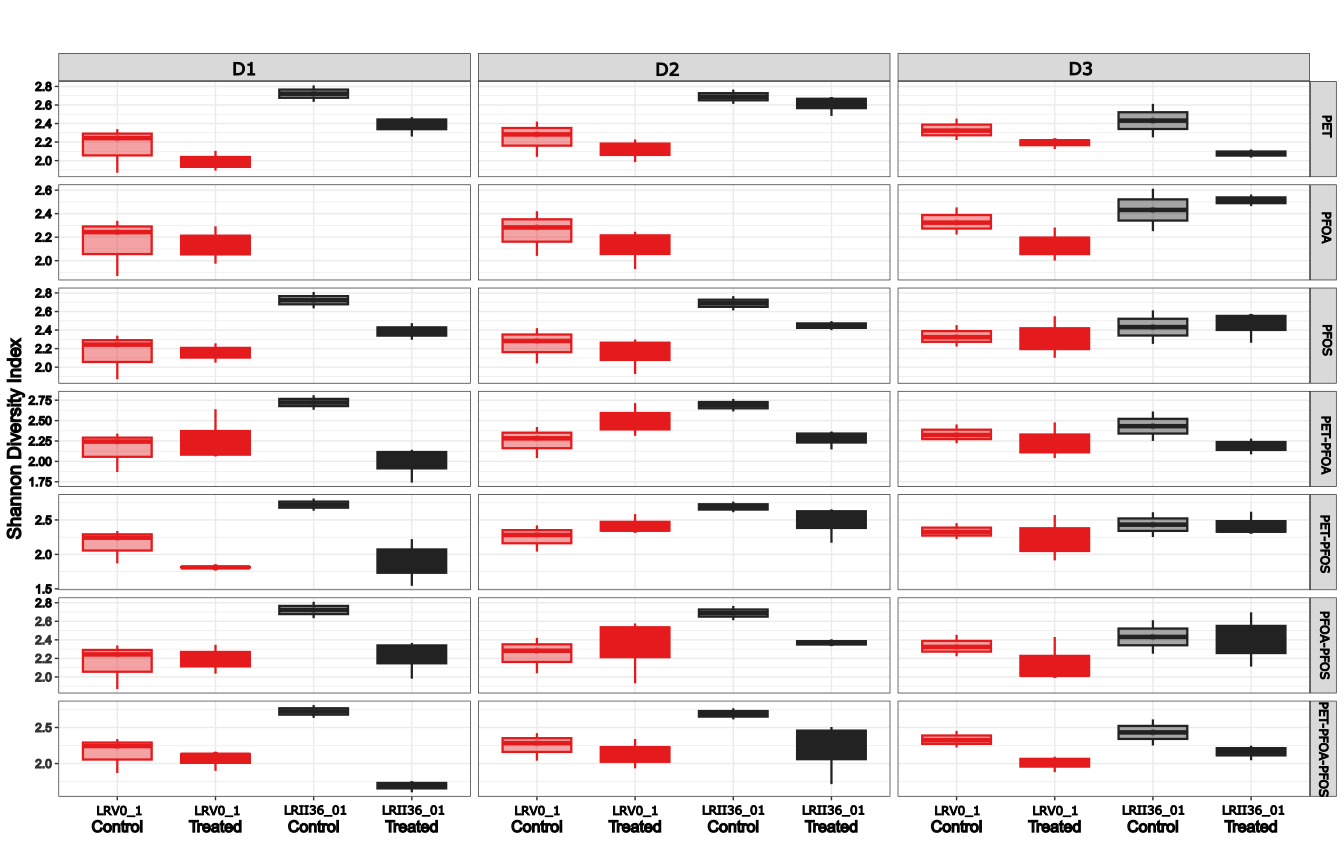


**Figure S3. Principal Coordinates Analysis (PCoA) of microbiome profiles across three sampling days.** PCoA plots of beta diversity between control and exposed *Daphnia* genotypes —*LRV0_1* (black) and *LRII36_01* (red)—shown for each exposure condition (PFOS, PFOA, PET, PFOS+PFOA, PFOS+PET, PFOA+PET, PFOS+PFOA+PET) and treatment day. Control samples are represented by open symbols, while treated samples are represented by filled symbols.


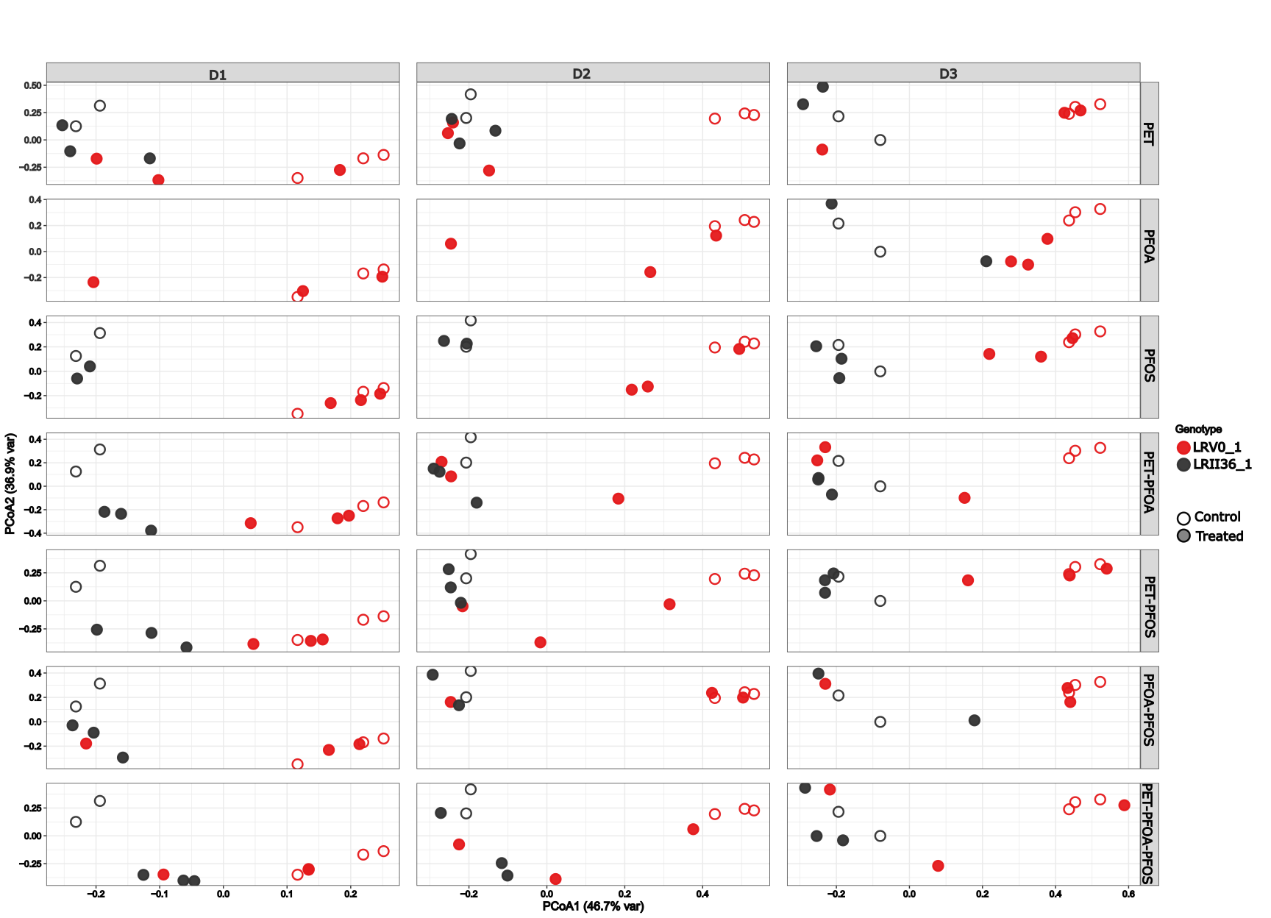

Supplement: Supplementary file 1 [file 88a6d3a730525d175f54c50d.docx]
