# Supplementary material for: Multi-omics characterisation of Daphnia magna exposed to PFAS and microplastics: transcriptome and gut microbiome datasets
Source: Research Square preprint supplement (doi:10.21203/rs.3.rs-7840812/v1), 2025-11-13
Supplement: Supplementary file 2 [file 93a22e5d059ce489173491fb.xlsx]

## Sheet: LRV_0_1
Genotype	LRV_0_1
Day	Day1			Day2			Day3				Day1			Day2			Day3				Day1			Day2			Day3				Day1			Day2			Day3				Day1			Day2			Day3
Replica	R1	R2	R3	R1	R2	R3	R1	R2	R3		1	2	3	1	2	3	1	2	3		1	2	3	1	2	3	1	2	3		1	2	3	1	2	3	1	2	3		1	2	3	1	2	3	1	2	3
Treatment	Control	Control	Control	Control	Control	Control	Control	Control	Control	Control_total	PET	PET	PET	PET	PET	PET	PET	PET	PET	PET_total	PFOS	PFOS	PFOS	PFOS	PFOS	PFOS	PFOS	PFOS	PFOS	PFOS_total	PFOA	PFOA	PFOA	PFOA	PFOA	PFOA	PFOA	PFOA	PFOA	PFOA_total	PET_PFOA	PET_PFOA	PET_PFOA	PET_PFOA	PET_PFOA	PET_PFOA	PET_PFOA	PET_PFOA	PET_PFOA
5a8e8257739ac2a1b52a438d5c6f2f18	134360	120748	199039	45766	14349	13401	13498	36911	3348	581420	192238	201913	175245	226892	107970	82171	123424	32861	38112	1180826	137216	162076	190286	141365	48535	166191	47591	73301	35085	1001646	160366	174799	232743	120050	55702	111697	128563	105785	66667	1156372	102364	154562	233382	68469	64782	78472	112358	40856	56523
469e8ac376b9694e577c762d2acf85af	144189	130306	216277	49129	15003	13659	14562	40103	3351	626579	209693	209018	184086	240722	116171	88585	132256	34830	41407	1256768	148270	175831	206760	155073	49813	182978	51749	80039	38001	1088514	171080	184208	252684	129121	60141	121084	137272	115480	72399	1243469	108867	169264	250537	73564	65418	86176	122957	44132	60703
f2608b2964c358709ab061884c2ef05c	0	0	0	0	0	0	0	0	0	0	16573	0	75067	49497	221579	124539	97446	0	0	584701	0	0	0	0	0	0	0	0	0	0	0	0	84829	0	0	166042	0	0	0	250871	0	0	0	0	175443	107559	0	196974	151037
d958ddfb766fa657f21810668052c8ff	0	0	0	0	0	0	0	0	0	0	16330	0	74271	49629	225562	127631	96223	0	0	589646	0	0	0	0	0	0	0	0	0	0	0	0	86998	0	0	172289	0	0	0	259287	0	0	0	0	168161	110398	0	201204	154503
35a08b2cd4ea31983ded4d916e058977	96554	103868	45637	189444	252768	142234	152793	180971	192547	1356816	0	86957	0	0	0	0	0	237806	158971	483734	100926	88186	80669	84702	284843	151177	52523	149406	187396	1179828	50809	129980	0	105788	188135	0	135436	129679	152096	891923	17500	74195	101960	41929	0	0	57135	0	0
27ed4ea5d922bfb4bbe8bb7bcf41d318	99110	106787	46863	196542	258729	138557	156236	188369	196447	1387640	0	84093	0	0	0	0	0	231691	164188	479972	97229	90763	82686	86578	279797	156419	53475	153522	193723	1194192	51346	132083	0	108412	194350	0	139552	133785	158033	917561	17219	75536	100630	42043	0	0	58587	0	0
9888dac64cbf7a4cabbb7323955476ed	15221	20147	7791	19052	14959	13454	63846	33698	46403	234571	2760	20757	26576	6404	11863	12528	17353	40816	41664	180721	12702	13808	18395	14875	5597	19507	67917	25396	46321	224518	6672	11440	9590	7806	4161	11181	28752	7594	14733	101929	1303	15222	17103	10798	14147	16040	24289	16213	22816
f4519a10d29b41fcb29db4e9cb3653f6	15636	20448	7910	19895	14678	13289	65324	35091	47665	239936	2752	19679	26284	6122	12019	12557	16659	40146	42643	178861	12429	14184	18717	14759	5703	20325	69418	25976	47104	228615	6571	11197	9398	7736	4147	11427	29426	7611	15276	102789	1339	15258	17306	11011	13791	16062	25073	16009	23134
326481378072da6f54d5b92576cc3a72	4129	6448	1559	37575	20738	17859	16856	29407	32409	166980	424	657	781	5995	36682	8434	1368	48377	77746	180464	5749	7792	2302	28245	32462	14849	11730	37489	43104	183722	2594	8942	3493	7552	25698	13050	13896	15302	22765	113292	2347	1943	3466	11268	6043	7617	19778	31602	10630
a00e4532c96e71ed11f60b48835f5135	15850	17935	25549	5933	1995	1762	1675	5205	536	76440	27771	25609	22113	31771	12233	10911	17769	4128	4323	156628	18864	22123	24871	19705	4683	23081	5502	8778	3484	131091	21891	19564	30545	14001	6502	14144	14580	15621	8255	145103	14436	19702	28743	7299	7822	10690	13430	5322	7448
0c4d8d981ba24a3eb077fef905a7773c	16342	19202	27309	6236	2161	1830	1888	5606	491	81065	29705	25913	23093	33111	13094	11808	19222	4296	4652	164894	20113	24115	26845	21282	4799	25214	5937	9317	3617	141239	23371	20707	32772	14887	7000	15129	15183	17106	8742	154897	15224	21347	30493	7656	7874	11304	14316	5945	7832
675abe33b6674fd101b47ad9e4c26f3e	4292	6613	1520	39656	21748	18702	17393	30406	33510	173840	396	634	820	6175	37756	8694	1521	49019	81874	186889	5911	8180	2342	29775	33257	15681	12036	39469	44808	191459	2530	9306	3555	8058	27509	13631	14824	15971	23737	119121	2430	1831	3526	11566	5859	7902	20648	32877	11017
376ef64373e694da0ecea919fc5124d9	14814	5955	3161	7390	4926	2236	1421	829	564	41296	7836	1447	4373	7511	1620	9455	1407	466	1162	35277	1551	1948	8230	4635	5115	9840	533	404	1251	33507	9295	9166	10389	4054	2877	6522	836	983	569	44691	12177	1007	5509	9039	31096	29988	35415	2858	7619
d07e9b0a27ac930f584ba34c40aa80bb	15284	6378	3190	7718	5322	2287	1644	859	604	43286	8296	1357	4394	7917	1716	9802	1566	471	1176	36695	1619	2137	8718	4763	5009	10667	560	445	1346	35264	9633	9245	10952	4152	3086	6765	865	1022	604	46324	12696	1039	5768	9415	30883	31965	37802	2965	8057
02be874404ee521287f13aa4484c39e5	4414	589	245	2925	5650	3401	6085	5654	4667	33630	5233	584	2837	11103	1160	5444	5174	5920	7682	45137	790	357	1561	5040	3584	3931	410	1075	2241	18989	8783	2236	3803	13229	4510	4319	1569	601	2001	41051	4409	117	3166	8440	5450	8549	3540	6749	2301
e7ac45e0aeb46bb50e16a6f7df0ada78	4382	599	236	3048	5508	3336	6298	5684	4553	33644	5129	528	2647	11398	1093	5464	4906	5786	7893	44844	765	392	1690	5441	3500	3947	400	1047	2289	19471	8741	2109	3891	12901	4508	4184	1637	586	2145	40702	4325	130	3185	7983	5043	8752	3491	6809	2163
ea0800a3c11a1cea9d679fdf081d0e0d	415	86	1268	5739	387	4222	10215	9342	944	32618	0	344	467	1085	517	365	1197	102	20	4097	10173	76	26	1341	3880	598	18304	5617	374	40389	93	1202	0	527	0	6296	1091	18	2878	12105	42	9090	208	436	5804	996	730	58	2206
8341894fc01951f1782e1b8a2866749b	1400	2713	731	3827	4428	4101	5196	1751	3021	27168	170	1921	2597	436	1847	1613	635	1678	852	11749	795	1647	7241	2094	1899	5194	1779	1974	2614	25237	875	1544	2110	1035	3284	2833	353	995	1415	14444	69	2614	4625	660	3374	2168	148	1359	794
4fcf7133f087bcb5bcc508334224bf3c	112	198	66	160	2027	910	6113	1203	1058	11847	2891	66	104	3631	149	378	1757	200	48	9224	24	0	169	129	0	91	180	38	151	782	0	157	0	0	70	29	0	50	144	450	5161	42	525	2276	148	169	264	252	108
545100c39ff4b62e59f1d6fee9387fdc	429	97	1420	5947	373	4486	10899	10114	1020	34785	0	317	494	1110	548	407	1323	116	0	4315	10811	87	0	1404	3954	677	19962	5951	415	43261	74	1229	24	553	18	6600	1070	25	3198	12791	44	9812	211	447	6026	1015	722	59	2335
570355999c59916844b6408814e4eb35	324	90	1120	4514	318	3665	8647	7887	654	27219	0	295	311	880	476	329	927	58	0	3276	7887	68	0	1066	3037	448	15050	4654	289	32499	62	994	0	361	18	4878	803	0	2242	9358	33	7337	174	308	4774	770	521	49	1856
94382f21781a6dafd1dc7f03dec47aa8	377	33	15	407	307	142	3126	45	445	4897	1204	143	623	1776	357	546	651	642	468	6410	102	39	35	214	0	24	104	36	73	627	22125	52	365	2790	72	89	171	0	217	25881	16983	0	883	4275	50	243	913	23	38
0016dade7442fdc5b9314100492fda7a	346	68	1104	4730	317	3926	8918	8551	600	28560	0	295	294	951	483	365	1025	91	15	3519	8608	73	0	1193	3175	510	16650	5027	310	35546	74	1043	0	329	29	5346	897	60	2520	10298	0	7924	172	325	4783	819	550	52	1942
b819828d38c37cddba19e7c079b53769	3887	658	1188	503	160	581	33	0	0	7010	1039	235	1343	605	30	77	36	24	21	3410	262	854	2064	144	425	1380	0	13	0	5142	2308	1445	1484	795	83	426	23	0	0	6564	343	758	2568	439	1253	2488	372	0	77
e148a9145c7b24eb5989679e89ea8ae7	1552	2744	703	3879	4526	4042	5150	1711	3040	27347	149	1992	2621	463	1919	1719	643	1552	823	11881	703	1704	7323	2013	1891	5257	1723	1987	2771	25372	800	1536	2063	1054	3322	2948	385	966	1376	14450	72	2554	4756	699	3216	2141	157	1469	870
35cd44f82487cb84024cd15ba68a56ae	389	26	18	346	300	123	3139	40	431	4812	1297	147	607	1703	359	479	602	649	538	6381	94	31	37	202	16	26	98	25	94	623	22401	63	376	2689	66	86	163	0	215	26059	17248	0	797	4249	38	239	991	31	40
9f65f304cfe1ae8488ce89a095cd03c1	102	185	65	134	2092	962	6291	1227	1045	12103	2803	65	113	3515	137	366	1699	173	30	8901	38	44	172	140	33	74	166	28	163	858	21	132	34	27	59	30	0	32	112	447	5205	39	591	2178	180	161	272	266	116
66b3cb40baa725dda42e229cae8267a7	592	408	158	400	2389	321	1150	533	434	6385	81	309	366	136	274	330	176	770	117	2559	45	103	452	811	804	817	228	300	208	3768	177	404	295	117	327	527	206	191	133	2377	184	99	261	322	868	896	398	599	351
9f0a08939646fd773271c9a6f82b1781	117	370	176	257	450	650	333	82	677	3112	4227	28	973	2753	418	1132	1229	227	161	11148	251	81	87	206	32	936	213	61	0	1867	2879	31	1634	634	0	237	497	29	100	6041	3555	0	539	1061	173	224	465	62	63
b21dff2364c1fd87ea847570b4e4e52c	3697	690	1159	513	183	515	37	0	0	6794	1116	204	1406	528	18	56	23	21	25	3397	257	820	1982	156	426	1375	0	0	0	5016	2333	1338	1495	805	90	460	26	0	0	6547	370	806	2601	454	1168	2461	403	0	93
ffecd0109ba29bdb8de8d9deda73b950	45	188	119	1120	996	423	206	141	80	3318	65	68	39	40	113	0	51	581	673	1630	173	897	164	316	214	165	356	293	423	3001	40	292	155	162	85	20	51	9	101	915	831	173	157	179	49	80	1159	480	103
2e476de4b1e8d6aee8a8fda2629243f8	294	26	24	169	800	368	661	383	979	3704	119	95	125	246	330	131	123	3852	244	5265	39	397	118	63	105	48	32	593	469	1864	991	639	53	83	88	42	0	90	167	2153	474	38	98	125	245	129	70	291	565
a5221bca47972e1b596a14ccf2ec5483	192	419	196	58	91	150	39	550	4703	6398	5	44	106	0	38	54	5	1937	390	2579	0	707	333	74	112	48	207	581	368	2430	37	120	107	15	32	29	30	37	52	459	368	275	137	22	31	62	88	41	48
c55d543cf08a2bc69c18761a02d5c75f	206	139	58	722	654	916	513	403	386	3997	159	218	198	816	201	292	516	501	338	3239	72	92	235	262	933	537	146	266	662	3205	167	476	247	307	646	355	82	274	585	3139	277	93	309	376	646	552	670	501	566
1c0144882347cb3c002dbd2f98a87e2a	120	370	188	258	429	615	325	85	653	3043	4333	0	975	2733	393	1149	1232	193	211	11219	288	72	108	235	28	1088	249	60	30	2158	2926	27	1641	639	20	263	500	0	88	6104	3513	5	480	1050	211	202	459	50	82
a6fddfc375441ae3cc03f8e4f8ef8ba6	5332	3942	584	773	368	210	429	55	349	12042	93	91	716	77	206	59	125	173	21	1561	8712	37	684	201	7364	75	5	346	50	17474	299	1018	33	428	167	29	752	372	469	3567	114	66	140	92	330	54	40	885	0
b453d80e67b66ef91901f908b7ca5e6b	688	430	125	449	2441	326	1172	551	502	6684	95	275	365	141	245	341	169	691	132	2454	47	129	478	871	740	870	202	325	219	3881	203	465	270	128	318	510	204	187	124	2409	173	91	242	282	883	957	416	567	391
bcba0f85e14c5a435fd6e14ec09e44a8	192	17	324	138	893	1879	360	626	3976	8405	777	188	829	2894	218	972	1751	1204	806	9639	120	138	1820	137	119	484	77	297	865	4057	328	24	103	891	411	116	291	143	1835	4142	183	68	92	230	349	570	201	139	1561
e3808cc1cc5a00a9509e4a4fe1f39c54	1343	1171	1420	323	4346	966	242	861	332	11004	32	3218	711	0	51	58	83	350	159	4662	286	600	723	271	71	563	842	157	47	3560	440	589	129	12	24	214	614	171	129	2322	305	791	1352	277	28	86	17	306	41
a125f7ea946b06bfc357d31575999b71	188	65	45	271	207	197	89	89	36	1187	405	13	65	204	97	214	39	93	74	1204	158	461	520	423	176	308	139	128	254	2567	307	204	174	376	211	77	405	0	136	1890	105	63	163	294	106	416	1118	87	167
adc7d5e1d5a90e9011a5b7d0266b180a	193	158	61	738	615	908	491	389	415	3968	148	209	211	790	226	340	582	475	332	3313	93	96	267	258	960	544	143	260	679	3300	174	454	241	260	689	347	57	296	631	3149	279	74	327	419	581	501	699	490	640
e8d28f0383e8d0603da463d505097ffb	280	40	15	159	927	351	656	414	935	3777	128	89	105	253	317	119	127	3984	265	5387	43	463	99	71	108	49	33	564	497	1927	1015	647	58	82	64	31	0	84	148	2129	483	32	118	136	212	98	84	292	531
9289020ddf7e125bb11350fbdc0f15b1	5644	4011	606	796	376	215	399	71	354	12472	108	87	736	59	195	50	122	174	18	1549	9152	45	628	210	6954	66	0	373	41	17469	347	1037	32	359	125	37	759	384	510	3590	115	79	151	73	292	54	34	815	19
925c77c4658dbe591fc2b4acb029a57d	47	163	130	1161	984	451	181	143	101	3361	44	57	60	41	112	0	46	530	731	1621	219	817	176	348	203	163	304	266	470	2966	35	330	138	141	64	26	0	0	103	837	800	193	151	202	57	82	1159	439	94
ca941d1873960b8daefaf47bb8a1494e	213	120	28	191	1035	181	584	255	226	2833	55	242	98	65	109	188	78	390	48	1273	36	43	197	396	339	402	142	122	128	1805	57	114	108	58	100	223	74	94	72	900	86	43	131	158	479	487	171	226	186
30b3f4a5cb4b99911df3c977a43d5f6a	1407	1243	1588	308	4637	988	230	930	333	11664	0	3114	684	0	63	71	97	398	196	4623	333	635	791	334	85	604	896	135	41	3854	457	550	143	0	28	192	676	157	119	2322	326	904	1360	272	33	92	17	338	43
5583c15c78bda56ab8139c20222192f4	181	415	174	51	105	145	45	602	4498	6216	0	41	85	0	0	29	0	1891	433	2479	25	719	378	81	100	62	178	565	362	2470	49	127	114	0	0	35	0	24	0	349	312	266	134	0	29	61	82	48	33
39af99b891680de6838939af2ffcd55e	615	150	408	419	703	308	527	287	400	3817	843	33	58	592	18	23	217	29	30	1843	283	94	285	166	639	198	49	89	139	1942	67	242	285	24	192	109	0	68	121	1108	865	76	285	384	208	392	104	192	258
d5c1053e5e8bea3375265d00ec436196	216	22	322	122	920	1938	342	653	4079	8614	698	200	840	2888	286	922	1695	1325	876	9730	136	140	1853	154	106	479	84	288	913	4153	333	25	104	908	434	100	320	150	1790	4164	152	69	108	229	302	573	212	148	1617
54e4ba32e458d4dcd16b737096ee07e2	0	872	191	1119	222	460	2388	387	685	6324	244	136	177	52	45	136	429	534	159	1912	1481	827	723	257	33	215	1647	2691	1549	9423	129	201	91	1050	224	140	251	142	427	2655	306	458	515	416	104	588	232	2213	1397
f86c0f123c46f5b3e8b9c45cc36ab043	215	68	39	279	203	168	99	103	32	1206	409	0	79	191	92	223	41	63	94	1192	219	455	474	406	160	316	127	126	251	2534	335	201	169	375	202	107	385	0	148	1922	118	78	153	330	113	440	1053	82	203
bd7882adbcf3a71773de47c3882188ac	0	820	165	1081	207	443	2324	353	764	6157	235	126	225	60	40	127	420	524	175	1932	1459	865	758	276	36	196	1705	2611	1648	9554	88	225	96	1099	214	146	239	138	450	2695	283	417	495	390	73	588	237	2206	1388
5bf3cf11961d64be4ac309350ba86aa9	238	115	27	204	976	198	600	246	223	2827	42	242	107	51	117	172	85	361	58	1235	18	53	176	370	345	430	118	123	136	1769	52	123	102	73	123	254	82	101	61	971	75	42	117	125	465	472	185	270	178
adae552db52c6353e707a87f1c180ceb	524	30	193	331	975	1552	310	180	2118	6213	607	116	212	1756	97	288	513	113	130	3832	99	25	162	111	72	212	31	56	93	861	280	11	72	637	46	39	136	37	76	1334	104	0	40	154	63	157	60	62	124
3a7a36025876294dce5bc683ef8f3377	524	149	408	409	712	263	501	290	377	3633	777	42	40	606	18	25	185	51	0	1744	271	108	270	154	586	190	25	63	103	1770	70	231	322	16	178	115	0	64	127	1123	852	68	264	396	200	366	110	210	235
101640dc48dcc94e7430d22db2c5233e	0	51	30	193	344	324	54	41	0	1037	0	0	0	0	49	0	0	236	306	591	0	249	43	66	146	43	30	116	241	934	0	110	46	35	0	0	0	0	32	223	66	30	0	64	0	30	106	178	34
1ced4bf1837923d1352bc47fb6556441	39	188	228	37	822	306	164	322	465	2571	122	164	221	377	392	326	194	340	241	2377	57	213	778	48	55	294	12	0	563	2020	253	243	363	258	84	194	21	40	4903	6359	195	27	492	208	245	90	28	263	91
cec7192f79912059e7d156e5c2dbafc2	18	201	176	63	356	15219	29	108	6727	22897	51	61	33	0	28	135	0	80	43	431	27	27	56	17	0	57	0	22	0	206	52	93	30	5	0	0	0	0	65	245	137	0	61	19	67	25	32	24	4
b815b0dbfaa6629640f514dcd5e9d87d	67	0	51	124	413	649	273	198	1319	3094	48	0	44	202	26	108	198	55	44	725	27	16	174	103	69	126	48	53	186	802	132	39	75	821	483	94	309	87	398	2438	82	42	40	129	360	311	33	166	349
6c735f0d2bcdd83b5887da644af4111f	30	45	0	31	82	74	11	24	33	330	334	0	6	404	0	20	2756	0	0	3520	0	0	18	36	0	0	62	0	0	116	0	0	18	17	0	37	0	0	25	97	7704	0	12	5559	0	133	395	21	25
41534695618c037b0be9baf57c52f24b	89	52	159	50	578	344	127	226	611	2236	99	81	176	224	276	327	121	319	179	1802	51	222	994	61	30	243	0	96	564	2261	255	168	265	196	170	161	33	44	5169	6461	196	0	361	105	188	112	0	237	103
08f5ebef98c1e281ab29d6a5b5cd0d4e	573	38	190	354	982	1565	261	195	2156	6314	604	101	185	1663	110	288	529	95	113	3688	84	0	136	109	77	167	37	63	64	737	269	0	49	572	58	41	116	42	98	1245	98	26	52	150	67	132	59	56	115
adbac1599fff58a0c3b18d2c1c1a9758	0	213	177	62	377	15195	30	86	6784	22924	60	69	30	5	24	147	0	85	37	457	0	16	56	0	0	58	0	0	10	140	66	87	32	0	17	0	0	6	52	260	133	16	50	0	76	0	28	0	0
e92f8c26d3532e0b7c58226556b39295	38	168	210	32	857	294	187	272	485	2543	127	167	211	346	323	344	167	304	181	2170	61	205	777	52	65	246	7	26	580	2019	259	230	368	247	83	198	22	24	4962	6393	209	24	464	213	239	101	34	264	73
265193c26cef29e3684a219b367d1a7e	0	52	0	24	110	96	18	13	26	339	322	0	0	397	0	16	2794	8	19	3556	0	0	0	25	0	18	57	0	19	119	0	0	0	0	21	24	0	16	27	88	7741	0	0	5523	0	131	418	26	0
448729f4ddfb5f38d15423c3d7ceeeb1	0	46	0	20	134	113	0	80	28	421	81	94	98	69	47	28	163	221	66	867	23	0	0	30	0	0	13	25	0	91	360	23	106	101	0	13	31	0	19	653	7105	0	39	694	0	34	365	80	36
731e87b9f5b1c190106852520b44be16	80	67	142	53	592	410	108	244	534	2230	91	64	183	201	260	358	102	329	192	1780	81	201	949	44	43	249	32	84	576	2259	267	159	265	188	141	207	35	50	5275	6587	160	37	369	73	153	107	19	269	101
fcbc0ecc2706150ae6a536df0fe7543a	59	0	59	129	422	692	249	181	1312	3103	64	0	38	235	0	112	196	57	37	739	44	19	200	96	69	121	49	53	179	830	155	42	75	857	506	116	330	70	397	2548	88	37	57	105	354	351	35	163	332
a6983429e6ce3e12346908b360e2b059	0	76	30	160	305	328	60	61	0	1020	23	0	0	0	56	47	0	256	264	646	0	207	43	84	130	31	25	107	275	902	0	120	56	37	0	0	0	0	44	257	63	26	0	65	0	28	111	164	32
22bcb7803f32752e0af8878452df597e	16	46	15	0	202	86	26	73	25	489	79	87	90	56	44	32	169	222	56	835	0	0	11	36	0	31	0	0	13	91	365	27	93	108	18	0	23	0	0	634	6982	0	40	734	0	38	310	84	41
b59e99f0f0a3b274b0448914c8658b74	125	108	101	196	183	531	117	90	219	1670	77	73	28	232	46	139	53	46	30	724	30	47	63	48	463	167	42	47	123	1030	127	97	104	227	201	188	0	40	159	1143	147	0	60	197	383	312	143	69	106
c955359fa564acaf148fcd56a50d16cc	2169	125	179	367	1098	347	619	83	169	5156	1188	0	29	217	0	12	133	0	0	1579	628	46	875	411	18	39	76	21	0	2114	17	25	0	0	14	17	0	0	10	83	1192	35	47	132	0	84	52	0	0
b3069dcc554265fa513104d2d917aa30	0	25	0	0	334	55	4	281	120	819	0	0	0	0	0	11	0	129	26	166	0	0	0	0	0	0	0	43	15	58	0	0	0	0	0	0	0	22	0	22	0	0	0	0	0	0	0	43	0
6413db727c667a093ef231ac3cb09479	91	0	65	30	44	45	64	0	0	339	64	1557	841	128	311	615	233	1223	383	5355	0	0	38	11	0	29	0	18	0	96	133	0	21	89	12	0	52	0	30	337	44	0	0	21	0	0	0	0	21
3cd2257cb2a60c07283cc1c3516a0367	2204	118	145	338	1111	368	638	92	207	5221	1227	28	34	224	8	11	145	0	0	1677	589	52	981	442	24	49	84	0	20	2241	27	33	22	0	0	0	0	26	0	108	1298	0	54	127	0	85	40	0	13
faf4d610a7da531656b5509b1fcbd554	0	0	0	0	0	0	0	0	0	0	1268	0	0	1811	0	11	510	0	0	3600	0	0	0	0	0	0	0	0	0	0	21	14	0	0	0	0	0	11	8	54	834	0	26	176	0	0	28	13	12
3cb7cb0ce5e9e146613add94707370ca	113	119	71	102	129	148	25	30	86	823	46	334	277	38	145	265	58	175	68	1406	31	43	133	66	52	102	0	0	7	434	73	173	57	0	0	0	22	73	25	423	71	83	367	45	101	85	38	46	90
65f303a70a60e57bd6b51881f2d4b794	0	0	0	0	0	0	0	0	0	0	1321	0	0	1851	0	11	519	0	0	3702	0	0	0	0	0	0	0	0	0	0	18	0	13	21	0	0	0	5	0	57	819	0	22	163	0	8	32	7	0
d5b321d10fb465a0f66f0948b507c7c0	132	101	76	214	187	548	132	96	205	1691	98	68	37	251	45	102	61	47	29	738	34	44	66	41	446	151	38	41	99	960	153	81	96	217	194	239	26	38	165	1209	142	29	73	169	334	366	150	65	109
fbcb2b050da82386feefa4711eb10d25	66	68	50	66	347	175	40	60	79	951	76	58	123	46	33	124	30	32	36	558	0	0	79	29	169	84	0	21	53	435	39	74	42	88	44	86	0	0	123	496	54	24	83	39	95	204	31	38	102
8b74d2e532afbdc56e891a9266da4925	119	37	67	20	138	35	57	35	0	508	40	22	127	71	27	16	59	15	18	395	28	45	43	49	61	50	18	0	16	310	77	241	47	49	27	62	26	14	20	563	70	26	100	64	60	48	82	0	22
c14bdcdee27b7575be8970cb688ea129	124	0	65	30	66	43	52	0	0	380	47	1496	827	109	340	622	225	1187	439	5292	14	0	0	0	0	26	0	0	0	40	134	0	18	114	0	0	56	0	31	353	57	0	0	29	0	10	14	0	0
a5ef7d31c74cc585a9fe2a2f6abe0412	155	289	38	50	1742	33	68	269	0	2644	0	424	118	38	255	173	26	227	46	1307	26	40	50	82	0	41	0	52	0	291	29	191	20	0	13	0	0	78	31	362	16	57	160	0	37	0	0	68	0
891402c33fe52514ffa49d8ca6918fdc	116	105	77	137	106	139	28	34	90	832	62	308	276	45	147	266	46	178	65	1393	0	56	131	60	41	129	16	22	0	455	89	205	54	0	28	0	14	66	24	480	55	79	350	55	84	81	43	46	85
94ac53b0faf4db2267bcc0847a3158d6	85	66	0	68	92	33	35	37	0	416	43	0	0	0	0	0	0	0	0	43	0	28	0	63	102	55	23	0	29	300	0	53	0	0	19	53	0	14	22	161	0	0	65	35	94	41	77	35	35
0f939b34b6d6700b60c2ee4c137153b1	159	33	28	34	51	0	20	0	11	336	158	0	0	117	0	0	0	0	0	275	41	0	37	46	34	0	12	0	0	170	23	67	29	0	26	0	0	11	0	156	235	28	75	55	19	34	17	0	18
ebe6b58b4cc138d741488bc2d5719da6	152	298	51	74	1809	32	71	261	10	2758	0	422	122	31	287	168	0	205	59	1294	0	36	37	80	0	36	0	44	13	246	0	175	0	0	0	0	0	98	51	324	14	68	136	0	48	30	0	69	0
eda058a0fd7839a36319990046b9d7bd	0	28	0	0	329	62	0	247	103	769	0	0	0	0	0	0	0	146	0	146	0	0	0	0	32	0	0	52	0	84	0	0	0	0	0	0	0	0	10	10	0	0	0	0	0	0	0	33	18
e88f669fd756af4745b9ed415ff13f63	41	145	38	50	640	23	123	314	31	1405	0	106	32	0	280	0	102	312	0	832	29	85	30	64	139	32	0	142	0	521	0	84	0	0	68	0	0	26	20	198	4	21	38	13	138	0	0	96	44
cf8e75c97b5576f0b084f19dfdcfaaaf	62	63	52	60	377	173	36	50	71	944	67	49	124	43	28	99	24	25	30	489	31	32	91	34	194	105	0	0	40	527	38	82	55	86	44	75	0	0	115	495	50	0	93	36	121	206	25	30	109
11db858e4ffbbce26e745b012e80309c	129	39	58	20	174	35	50	32	17	554	48	0	111	87	21	25	66	20	0	378	32	28	46	58	75	41	22	17	0	319	57	262	44	33	21	50	0	0	19	486	63	36	117	75	45	60	78	18	0
6b7ebe91d9ed068221f68cfd109b3a79	18	0	0	52	85	81	162	101	102	601	0	25	19	69	0	36	59	80	34	322	0	0	0	28	0	0	46	52	68	194	0	24	33	61	66	70	58	26	49	387	0	0	0	16	0	0	37	50	48
7d540eada9f85c8ecbca5c0c4400b4ab	100	232	45	0	179	0	86	28	85	755	19	37	4	31	0	9	64	127	26	317	0	99	0	0	41	18	0	112	20	290	57	133	4	0	33	0	60	0	0	287	30	51	0	0	26	0	46	67	0
f30d49432760712ee187e5d0826ffa94	0	0	0	0	0	0	28	97	36	161	0	0	0	0	0	0	5	68	15	88	0	9	0	0	7	10	0	49	17	92	0	0	0	0	0	0	0	50	0	50	0	0	0	0	0	6	9	21	31
76ee249ef9fb0e13adaf2e507e610f8d	74	34	31	39	59	36	74	70	96	513	8	61	19	39	62	70	47	170	94	570	12	38	0	10	172	25	0	61	39	357	0	89	0	35	89	0	0	62	51	326	0	0	45	0	268	50	49	108	38
3afd7ffed25c4a14062122b20fe6e0da	145	35	68	36	91	35	113	81	30	634	18	22	0	24	45	0	22	55	0	186	16	40	23	47	109	123	0	0	0	358	37	46	0	0	44	35	15	54	0	231	44	54	39	0	148	40	37	27	51
1af09838511a264f8960906701260360	82	87	122	0	0	0	0	0	0	291	121	86	121	129	72	55	63	0	0	647	93	112	116	90	0	117	0	0	0	528	71	111	136	71	35	78	0	63	0	565	66	93	178	0	51	0	85	0	0
1c65d3399ab8de1c968cae25fcb9bd19	144	69	100	51	35	0	57	0	42	498	141	193	83	102	25	49	52	0	17	662	20	27	52	19	0	55	0	0	48	221	112	20	61	61	0	19	13	0	0	286	144	32	54	76	20	39	0	0	26
c9d83c7905bdba696b3c0fb08528a5d9	162	25	25	42	55	0	20	0	14	343	156	0	22	139	0	0	20	0	0	337	43	30	58	52	41	16	0	0	19	259	29	70	32	0	0	0	0	0	0	131	206	16	93	59	20	15	11	0	22
579be4f0b5307459698e72422aff5032	0	15	39	22	20	43	18	0	19	176	1110	0	0	134	0	24	135	0	17	1420	0	0	27	42	0	47	0	0	0	116	26	0	30	0	0	22	21	0	0	99	453	0	24	30	0	0	44	0	0
864fa5582b24fcf889e4dd7b8d76806f	0	0	0	0	14	21	0	0	10	45	0	18	0	22	0	28	53	0	0	121	0	0	0	0	0	0	0	0	0	0	0	0	0	53	0	0	190	0	48	291	0	0	0	0	0	0	0	0	20
073c9b5629b6fcf4230c5a4b83e59a3f	89	61	0	58	67	0	38	29	0	342	45	0	0	0	14	0	0	0	0	59	0	0	0	65	107	58	27	22	27	306	32	43	0	0	0	56	0	15	33	179	0	0	56	26	89	41	80	21	31
f8ee208b9e0fac5e3cbe9ef26a34ff09	0	0	0	0	0	37	0	12	1598	1647	0	0	0	0	0	0	19	0	9	28	0	0	0	11	0	41	0	16	0	68	0	0	0	0	0	0	0	154	0	154	0	0	0	6	0	0	0	0	139
60a360b874e0b78892cd2acf24aa4c77	14	31	0	36	34	0	51	28	26	220	26	0	21	26	10	17	0	31	0	131	43	9	16	108	27	0	0	28	2	233	0	29	0	0	0	32	0	0	0	61	199	6	0	68	48	30	122	31	18
14bf25d3dafce329fa97a833cafad4b4	55	146	48	49	652	23	134	344	45	1496	0	84	0	0	251	0	112	294	0	741	0	107	32	63	124	37	0	142	0	505	0	62	0	0	46	0	0	25	15	148	1	26	49	23	96	17	0	93	0
8e218a901256a247aac33e055b3450e4	102	0	131	34	0	0	0	0	0	267	134	109	93	143	57	0	64	0	0	600	103	110	129	92	0	116	0	0	0	550	105	105	153	0	46	77	70	0	0	556	59	102	161	0	0	42	76	0	0
cf312f0c6e35b386015668cdb8cc75b8	74	72	134	0	0	0	0	0	0	280	112	145	100	148	66	0	78	0	0	649	81	68	96	87	0	109	33	0	0	474	103	120	165	86	0	77	59	0	0	610	0	93	150	0	0	0	0	28	0
897c1e4e5dd1b8f5db165bdf805a647d	25	0	5	128	38	0	26	0	31	253	20	8	20	0	0	25	0	43	15	131	40	26	0	43	55	12	12	0	0	188	39	0	0	55	19	18	0	0	0	131	97	4	34	47	0	0	59	0	0
9a5c1a82ee3d50a75c36e7827ef38a6c	69	53	38	186	244	133	211	200	252	1386	22	0	0	20	46	55	121	0	0	264	212	28	28	94	274	148	63	101	272	1220	0	0	19	95	133	126	30	0	56	459	29	0	125	123	23	0	44	25	20
de419b090f6743874330204d51a01966	21	22	20	0	76	114	24	25	26	328	0	18	18	19	11	0	22	0	0	88	8	0	0	0	0	0	0	0	0	8	33	0	30	54	0	19	21	0	117	274	0	0	0	0	0	0	0	0	0
5407c9b6549e4dbe2a46f739c0c70b24	91	86	129	0	0	0	0	0	0	306	131	112	110	156	72	0	86	0	0	667	65	119	116	109	0	107	28	0	0	544	111	120	137	87	0	77	87	0	0	619	0	86	164	0	0	0	0	24	0
04b51c7764e47d89d1a0849b65ef33ec	88	60	35	165	280	170	220	200	253	1471	0	0	10	17	52	60	168	14	14	335	239	28	29	89	266	133	66	106	267	1223	0	17	16	95	119	133	47	39	62	528	16	0	167	146	21	8	63	24	20
8e2b183556c1d5f21149cae088cccf7b	0	28	29	0	21	14	0	23	30	145	124	0	0	0	0	25	193	0	19	361	0	15	15	0	20	54	0	0	0	104	22	48	55	0	43	39	229	104	13	553	0	0	43	7	0	37	0	0	0
c6244eb19caf1d85c809162985345ef8	146	0	186	0	0	0	0	0	0	332	175	192	178	224	138	0	0	0	0	907	0	0	0	0	0	175	0	0	0	175	0	174	226	0	0	0	0	0	0	400	0	0	245	81	0	0	0	0	0
459b0726a5a59912cb2fa70149577671	73	225	41	31	182	47	89	52	102	842	0	0	0	0	37	0	47	128	32	244	12	108	26	35	24	0	24	106	19	354	48	156	0	25	28	20	55	29	31	392	36	62	24	27	30	31	51	73	29
816a4d462ad97331d45e83b51e1a94c5	0	0	182	0	0	0	0	0	0	182	168	196	0	197	0	0	0	0	0	561	122	0	0	152	0	0	0	0	0	274	0	0	216	0	0	0	0	0	0	216	114	0	215	0	0	0	0	0	0
e38be0a5c6675644a04f72eea1e88086	82	48	0	80	38	87	61	25	14	435	29	0	0	27	15	31	0	0	0	102	0	20	57	30	73	50	27	0	0	257	81	35	41	109	33	40	71	27	27	464	0	32	0	18	82	37	38	23	29
f6a21dca1c5401d3ff09137ebcb65341	0	0	12	0	41	0	16	0	60	129	0	0	15	7	6	18	12	24	0	82	0	13	0	18	0	29	0	0	15	75	17	15	0	0	0	0	0	40	27	99	0	6	30	0	0	0	16	7	0
91589b8c5ba3f411ac4b4cce0fe8d361	134	61	84	56	27	26	67	23	31	509	143	179	82	95	0	71	47	25	0	642	31	16	49	0	38	0	14	11	0	159	152	19	40	71	0	0	0	0	19	301	165	0	31	61	24	0	45	10	0
d7302b8b2a3b53270f9c4200fbfec011	16	0	0	0	0	0	0	0	1684	1700	0	0	0	0	0	0	30	0	0	30	0	0	0	0	0	40	2	0	7	49	0	0	40	0	0	0	0	190	34	264	0	0	0	0	0	7	4	0	129
ffc1985bd148fe6ef1d6ceb6d017294e	47	41	7	52	93	121	42	25	0	428	0	42	5	43	28	29	25	35	17	224	18	0	8	0	87	27	29	0	0	169	0	0	0	26	53	42	0	13	27	161	35	14	0	49	15	22	97	0	13
784f644042d4d78ace6291c924d3a278	0	24	15	55	79	70	135	118	95	591	17	26	0	48	0	0	64	90	30	275	5	8	40	0	0	28	0	42	56	179	39	21	0	69	52	0	63	25	51	320	36	11	14	17	0	40	56	38	49
a08e270a420633e1f53d3f7ef07ba06f	0	26	54	0	27	49	0	0	0	156	1202	24	7	131	0	0	162	0	18	1544	24	0	0	29	0	45	0	0	0	98	0	0	0	0	0	0	23	0	12	35	455	21	28	27	0	16	43	0	9
a581a0e2bf9cac15a631ab867da34fd0	87	39	28	44	68	42	72	69	90	539	0	71	29	31	78	95	44	175	81	604	0	0	11	0	178	32	23	58	41	343	28	78	21	29	81	40	0	58	52	387	0	19	39	21	251	75	29	104	48
940b2d73e7431ad97e2c06066538827c	55	14	0	14	211	0	45	0	0	339	51	0	0	17	0	0	41	38	0	147	48	0	0	46	0	0	15	0	0	109	0	15	0	0	0	0	0	17	0	32	310	0	24	88	24	15	52	0	0
74ec67d6535ea9e90ae67ed6f3139266	12	0	0	0	0	0	0	0	0	12	419	0	0	658	17	5	182	0	0	1281	0	0	18	0	0	8	0	0	0	26	14	0	0	0	0	0	0	10	0	24	309	0	4	56	0	0	11	11	0
0b3bd03044f415d42e23c60fd32382a5	132	36	37	25	98	31	98	88	37	582	0	21	21	0	35	31	35	47	23	213	0	46	0	63	110	117	21	15	19	391	42	65	11	0	33	0	0	62	42	255	29	48	0	40	154	46	0	22	50
315d5756b8b6832b470809e9717488f8	0	21	0	0	0	0	0	0	53	74	26	0	42	26	11	0	0	0	0	105	0	0	60	0	0	0	0	0	0	60	72	64	233	0	91	95	22	34	148	759	113	26	38	50	93	52	0	0	0
89303f03b4431c7678477175e7f3600f	34	16	0	15	27	0	14	0	27	133	199	0	65	580	14	62	215	35	27	1197	0	6	22	0	0	0	0	0	22	50	47	83	47	39	55	53	0	17	29	370	31	0	62	18	29	61	11	0	35
9b4d60b04216cee36b8c4980272bceaa	98	0	114	0	0	0	0	0	0	212	125	127	108	134	0	60	76	0	0	630	0	98	104	80	59	103	0	0	0	444	104	118	154	95	0	0	85	0	38	594	0	95	150	0	0	0	0	0	34
c962fc591b3cc126dae7f35c1135a2fc	0	104	52	0	144	2907	0	56	2116	5379	0	44	0	0	0	0	0	31	0	75	0	0	0	0	0	0	0	0	0	0	0	50	0	0	0	0	0	0	0	50	22	0	0	0	0	0	17	0	0
45f4e5cb01caa80a1085bbb56f2e550e	0	96	17	71	136	2697	0	61	2055	5133	0	0	0	0	0	0	0	0	0	0	0	30	70	0	0	56	0	26	0	182	0	42	0	0	0	0	0	0	64	106	0	0	66	0	0	0	0	0	0
59eeb6641d21e3a2fc80a1fed947a10c	59	58	0	0	0	0	0	0	0	117	87	78	61	96	55	0	0	0	0	377	58	72	89	47	24	84	33	0	0	407	88	99	123	60	0	52	57	53	0	532	49	66	102	0	29	38	68	0	30
998a18a48401d845debe753d9573ca89	0	0	27	13	63	0	51	31	0	185	12	0	0	0	11	10	31	0	0	64	0	19	0	0	0	24	0	0	68	111	28	0	0	66	119	35	40	28	166	482	0	0	37	0	0	21	0	0	101
5823ccecb2bd6bb20c50aeb1b6d61a62	0	0	0	0	36	73	69	59	89	326	0	0	0	33	0	46	16	61	31	187	0	0	0	28	87	21	0	28	0	164	25	17	0	41	0	21	0	0	0	104	0	0	0	20	47	21	38	49	22
22bbf0623d68b90811c4916646aea042	44	34	83	0	0	0	0	0	0	161	65	76	71	88	0	0	47	0	0	347	46	67	68	65	0	79	0	0	0	325	53	62	79	45	32	41	49	42	32	435	0	56	91	0	0	0	36	0	0
72dec4c28f80db8271c549f2bbc9fb19	153	64	8	37	93	55	0	23	45	478	11	0	31	0	4	0	21	0	0	67	32	33	41	20	50	44	5	20	0	245	0	198	114	0	56	58	0	29	22	477	43	22	139	0	85	63	0	33	0
7fadc3c5f37ba0f80499db8ab8cedcab	0	0	134	0	0	0	0	0	0	134	133	128	103	134	66	41	0	0	0	605	0	101	114	90	50	99	0	0	0	454	90	0	149	69	0	0	75	0	0	383	0	80	139	0	0	0	0	0	37
dd782f774f66384ca26251766057320b	0	28	18	39	56	17	43	0	21	222	32	54	0	0	0	24	16	34	24	184	0	0	29	102	18	33	17	0	0	199	9	31	24	20	36	39	14	0	0	173	173	0	20	70	42	37	121	0	33
da2d6af9f4e93be88acda8c6f569ae7d	25	0	0	54	0	16	38	0	0	133	35	0	0	27	0	0	0	0	8	70	29	0	0	68	0	0	23	0	19	139	0	29	0	0	0	6	0	13	28	76	0	0	57	62	0	9	0	0	28
e3ddab28ff7a13de7b75a4afce95b3db	0	0	0	0	16	18	0	0	17	51	33	19	0	0	27	32	67	22	14	214	0	0	0	0	0	0	0	0	0	0	26	0	0	70	0	9	232	0	47	384	0	0	22	0	0	0	0	11	0
9ec54040eb6369389c7ff6dc10e9a92e	0	0	0	0	0	15	0	78	0	93	0	0	0	0	0	0	0	69	19	88	0	0	0	0	0	0	0	67	0	67	0	0	0	0	0	0	0	30	0	30	0	0	0	0	0	0	0	0	0
3e3b9b8e85f5e1e5286433022db56d2d	21	23	12	96	132	89	123	92	205	793	17	0	0	0	26	37	115	0	16	211	108	44	40	80	126	69	29	47	126	669	0	0	22	60	76	70	33	0	38	299	0	0	81	84	21	0	35	21	0
cbd7bd4b02540bcd9bcb0c50d5340973	0	15	17	27	65	39	65	24	55	307	0	0	0	79	0	31	0	33	0	143	0	29	50	0	103	49	0	36	32	299	20	34	0	24	13	0	0	0	32	123	0	13	37	0	72	36	30	13	35
7ba48c5f8d3b0f8c6a382d4c98c7c6ed	45	36	58	18	0	0	0	0	0	157	52	59	55	77	56	27	0	0	0	326	42	47	65	44	0	31	0	28	0	257	41	84	84	38	0	0	42	32	22	343	36	42	77	28	0	0	38	0	0
43abca28d60f58e3cca49da9120a37af	57	20	0	0	188	0	46	0	0	311	42	0	0	20	0	0	23	38	0	123	27	0	0	44	0	0	0	0	0	71	0	18	22	0	0	0	0	19	0	59	294	0	26	83	11	14	57	0	0
2b0b5903c71f01181652a57d6aec85f9	35	5	0	91	43	45	0	14	36	269	0	0	18	14	6	0	20	56	0	114	37	0	19	54	53	0	0	4	0	167	29	44	22	46	0	0	28	0	0	169	91	0	33	51	3	17	50	0	0
022a8e6c40014c6ad20d9dd746a4363b	0	167	0	0	147	0	0	0	0	314	23	0	0	0	0	0	66	59	0	148	0	0	83	42	0	0	0	0	0	125	0	0	0	40	0	0	0	53	0	93	0	0	0	41	144	0	0	0	0
d1d9c237e3fb3675b42c3565db64113a	11	0	29	29	27	0	0	0	32	128	93	19	34	16	23	0	191	31	0	407	0	0	0	0	23	44	0	13	10	90	25	37	68	0	30	44	239	113	0	556	0	12	39	0	0	51	0	19	19
b46c67fe6469c32d1cc546ff7ffca689	0	31	0	0	34	28	0	0	26	119	980	0	0	144	0	0	70	0	0	1194	0	12	0	0	0	0	0	0	0	12	0	7	0	0	0	0	0	0	0	7	124	0	0	26	0	0	17	0	0
d643209e9f3790f02caf5f93be8afb39	21	30	23	0	78	129	28	0	30	339	0	0	18	0	9	11	20	9	13	80	0	0	22	0	0	5	0	0	6	33	35	0	46	78	0	23	22	0	115	319	0	0	0	0	0	9	0	0	0
efaa262a6d1c8d8597134dc3db3e341f	107	46	0	65	38	78	53	23	0	410	31	27	0	30	0	0	41	0	0	129	30	23	0	29	57	0	0	24	36	199	64	36	31	96	19	30	57	0	0	333	68	0	0	0	73	37	32	0	0
28c944c3c97e388c55c6e6457adef86f	25	19	0	0	0	47	55	0	0	146	79	29	0	39	15	43	12	0	0	217	0	0	0	0	0	0	0	0	0	0	179	0	95	212	0	44	28	0	58	616	84	0	37	25	0	19	0	0	0
7e2e3a6f9a0594c85f8327819e369d47	52	0	24	23	10	0	23	0	0	132	25	0	0	101	0	0	0	16	0	142	0	0	0	16	0	0	0	0	0	16	0	0	25	0	0	0	0	0	0	25	35	0	37	26	21	0	0	0	0
d768e50c31ed2314b9278405fd9b472c	3	24	0	0	0	0	3	0	0	30	0	0	0	14	12	0	7	45	36	114	0	8	7	10	0	430	0	0	0	455	413	26	0	10	0	0	0	0	0	449	0	0	0	0	0	0	4	0	0
da44d6f4082e2fa9d3bbccbcdfec8f29	0	0	0	0	0	13	39	0	68	120	27	0	41	0	0	25	0	9	0	102	15	29	54	9	0	0	0	17	0	124	65	65	242	26	87	83	24	49	155	796	115	0	37	57	90	39	17	19	17
b6617bd1b9050b134c56c951dce609e4	19	28	21	133	174	88	156	85	194	898	15	0	27	22	23	25	103	26	0	241	127	0	36	51	118	76	44	45	109	606	12	0	0	84	61	58	0	15	33	263	40	0	60	75	0	0	26	20	24
755ed8a46fd83cb47a220a78f8d1070b	0	0	0	59	90	132	29	0	0	310	13	0	0	43	0	0	24	0	0	80	0	7	0	32	92	32	36	43	8	250	28	13	0	0	0	0	25	0	0	66	31	0	16	50	0	0	100	23	0
d3646858b550762fd00c5c614b141efe	28	14	16	20	27	0	0	9	0	114	186	22	56	570	18	59	193	0	0	1104	0	0	18	22	0	19	0	0	0	59	48	77	58	38	60	40	0	0	25	346	0	16	50	23	28	55	0	21	26
5b77537533757e5c0931ba71534e9bd8	0	0	0	0	0	0	0	0	0	0	121	0	0	164	0	0	91	0	0	376	0	0	0	0	0	0	0	0	0	0	0	0	0	0	0	0	0	0	0	0	0	0	0	0	0	58	0	46	59
50bcbc5fe5c53c765e51ea51a9b06597	98	39	6	42	100	96	40	37	31	489	202	10	0	171	0	0	64	32	0	479	0	0	0	0	9	0	0	0	9	18	0	0	10	0	0	0	0	0	0	10	428	0	0	29	0	26	36	0	0
707881937223dc318933179f5d5b9dda	20	16	0	0	29	22	20	0	0	107	12	22	0	0	25	0	85	90	30	264	0	35	33	11	0	0	14	0	0	93	0	0	28	0	0	0	0	13	0	41	24	0	93	0	0	21	0	8	34
f04b0fa396ca8d15c2dda6cfee574070	41	39	62	17	0	0	0	18	0	177	62	68	60	74	38	25	42	0	0	369	41	58	0	61	0	54	0	0	0	214	52	47	71	39	0	45	34	0	0	288	32	61	68	0	30	28	35	0	17
45047ae248f03650bba3db31c94f9c70	0	0	20	0	0	30	26	20	0	96	0	0	0	0	0	6	0	0	0	6	0	18	0	36	0	37	0	20	11	122	12	0	30	0	0	0	0	0	0	42	22	0	0	36	0	0	17	23	0
b5f25a6334f3cfad647a5fa65255c890	0	105	0	0	195	0	0	3	20	323	29	0	0	0	5	0	46	74	0	154	0	0	68	23	0	0	0	0	0	91	0	32	0	38	0	0	0	0	0	70	0	0	0	0	103	0	0	0	0
09fe4d4f0e2883701c59e4795a09cacf	176	86	0	35	103	49	30	0	62	541	0	9	0	21	0	0	0	0	4	34	0	25	45	23	38	43	0	25	48	247	16	214	148	0	64	62	0	0	27	531	53	20	143	49	80	60	0	0	26
8fb7827ea4fb95cf097e589649d65465	30	0	0	0	0	34	21	29	49	163	6	0	0	0	0	0	0	0	0	6	8	0	0	0	0	35	0	0	0	43	0	0	11	10	28	34	0	44	36	163	0	0	0	22	38	18	0	0	9
9079f3fc8231161d2e248adc932810fc	0	0	33	11	62	22	43	31	0	202	0	0	0	0	0	0	39	19	11	69	32	0	45	15	0	37	0	23	61	213	23	0	25	71	102	0	64	34	191	510	0	23	0	0	0	23	9	0	101
873e0ff36c06f1f85374c273864cdd23	35	0	0	0	0	0	0	0	0	35	37	54	37	64	23	22	0	0	0	237	31	39	58	0	0	55	0	30	0	213	44	50	57	31	0	0	0	31	0	213	26	31	56	0	26	0	29	0	0
92d9bca2d1b8a0268ca975f319188f92	0	0	0	0	50	0	9	85	0	144	0	0	0	0	0	0	0	0	0	0	0	0	0	0	0	0	0	0	0	0	0	0	0	0	0	0	0	0	0	0	0	0	0	0	0	0	0	0	0
f67c22c31e28f85555c76450d986ff63	0	17	0	7	0	0	0	0	0	24	174	0	0	31	0	0	0	0	0	205	29	0	0	0	0	0	0	0	0	29	7	17	0	0	0	7	0	0	0	31	211	6	0	12	0	12	5	0	0
2efb584279ac3c095b426cc38535cdca	21	0	27	0	0	61	41	0	0	150	69	0	19	27	0	0	0	0	10	125	0	0	0	0	0	0	0	0	0	0	192	0	110	180	0	50	28	0	48	608	67	0	40	45	0	0	0	0	0
e46e81bbb64ce3397f218999b93440c6	22	0	0	22	36	63	58	60	89	350	0	0	0	34	21	0	19	48	0	122	0	0	0	0	70	0	17	20	35	142	0	15	19	39	26	19	27	22	32	199	22	0	0	24	44	0	37	0	22
bc39cc0de87d1579d20a8ecb7d5faed7	0	29	17	0	50	29	20	0	32	177	1053	0	10	149	0	0	43	0	9	1264	0	0	8	0	0	7	0	0	0	15	0	0	0	0	0	11	0	0	0	11	113	0	8	0	0	14	0	0	0
c14e055a2ec75649c70dcbdfe80bcad1	24	25	23	38	45	58	80	69	170	532	7	33	0	0	0	4	12	86	29	171	51	70	102	67	42	29	51	46	41	499	10	15	0	0	0	0	26	5	11	67	0	78	25	44	0	19	30	0	29
8fbf8b60f27232a4a5e9d359056dec69	47	0	62	0	0	0	0	0	0	109	0	65	56	90	0	0	47	0	0	258	42	43	79	0	0	0	0	0	0	164	0	63	89	38	0	41	0	43	0	274	40	0	84	0	37	0	40	0	0
fffa008870ae668545dad96c4b4079aa	0	0	59	0	0	0	0	0	0	59	74	61	52	73	0	0	38	0	0	298	48	59	57	0	0	0	0	0	0	164	43	49	66	35	0	0	34	0	0	227	0	54	75	0	0	35	39	0	0
1a62d5a173938a845f30b4c2239db5ab	0	172	0	0	144	0	0	0	0	316	16	0	0	0	0	0	81	42	0	139	0	0	96	26	23	0	0	0	0	145	0	0	0	36	0	0	9	0	0	45	0	0	0	0	111	0	0	0	0
8bf0416b80ea1646efe94c935f623917	0	54	0	0	0	0	0	0	0	54	63	71	65	68	0	0	50	0	0	317	43	0	73	0	0	60	0	0	0	176	0	0	67	0	0	0	0	0	0	67	0	51	77	0	0	0	0	0	0
59da37091d382f32ae36be2fbb733ae5	19	0	0	16	41	54	19	34	31	214	18	17	0	43	0	0	47	0	0	125	0	0	0	0	0	38	0	0	23	61	3	17	11	0	0	0	0	12	33	76	16	5	11	26	26	0	24	17	0
3b0c199fc9366f4ee2c4694bdcbc9f96	0	0	0	0	0	0	0	0	0	0	0	0	0	156	0	0	87	0	0	243	0	0	0	0	0	0	0	0	0	0	0	0	51	0	0	66	0	0	0	117	0	0	0	0	0	57	0	0	69
4d73c73c2d1f728068f680eeb28714c6	90	47	0	38	119	81	27	49	24	475	194	0	29	160	15	0	69	28	23	518	23	0	0	38	0	0	0	5	0	66	0	0	0	0	0	0	0	0	0	0	355	0	0	25	0	0	42	0	8
1ef6fccd7a9253a34a842f048252464e	0	0	0	0	0	37	0	0	0	37	0	0	0	0	0	0	0	7	0	7	0	0	0	0	0	158	0	0	0	158	0	0	0	0	0	0	0	0	0	0	0	0	0	0	0	0	0	0	0
175a28b63bcdbbc2c6296d735ecf354d	0	0	49	0	0	0	0	0	0	49	47	52	29	45	24	0	0	0	0	197	26	36	55	0	0	40	0	24	0	181	35	47	47	26	0	0	30	25	0	210	0	47	67	0	0	0	20	0	0
c622a9ab24cb3acc7dfa508ae63cfabd	20	0	0	53	25	0	40	0	0	138	0	0	7	0	6	0	3	0	0	16	27	14	45	63	0	0	26	0	14	189	0	0	0	0	0	0	0	0	0	0	29	0	39	66	0	0	46	24	0
3d10693376bf2905ca07c83500969489	34	0	0	40	0	45	17	0	89	225	34	0	26	57	0	0	34	0	0	151	0	0	32	22	0	36	0	0	0	90	51	0	0	22	0	0	0	0	0	73	26	0	0	0	0	50	29	0	26
64fed9fc0c7699e88c83d3c542367e9e	46	0	18	27	14	0	30	0	0	135	27	0	19	86	0	0	34	0	0	166	0	0	12	13	0	0	0	0	0	25	0	0	19	0	18	0	0	0	0	37	45	0	32	32	0	0	22	0	0
3cdd1357fd6cb12fcc1068b22556830e	52	46	0	0	46	0	0	0	29	173	0	0	44	13	7	0	0	10	0	74	58	0	0	0	39	0	0	0	0	97	27	0	4	0	15	10	30	0	40	126	0	0	24	0	0	0	0	24	2
98085f690ff4ba39f42ecd13dba3eec4	24	12	0	0	0	21	19	29	25	130	21	0	0	33	0	0	0	0	0	54	0	0	0	0	33	0	0	0	0	33	0	11	0	34	12	0	0	20	0	77	0	0	0	30	24	31	26	0	18
d20d23be1d498636a132e949454e8a01	100	0	10	0	35	0	34	0	225	404	0	0	0	0	17	18	0	0	0	35	0	0	0	53	0	6	0	0	26	85	0	22	17	0	9	0	0	0	43	91	75	0	45	0	0	27	42	5	0
670fe6f7a9a2d54c3751b318dcf14467	28	0	0	0	64	55	43	32	39	261	22	0	0	77	24	0	0	0	25	148	0	0	45	33	92	53	17	0	32	272	0	26	27	0	0	31	0	0	0	84	0	0	50	21	46	36	29	19	23
bc18fdd7cda1a79049b82a0ff32078da	0	25	25	26	51	65	84	56	129	461	0	26	18	9	6	0	0	66	36	161	69	93	83	66	0	37	48	63	58	517	15	0	39	0	0	6	17	0	0	77	35	66	25	33	0	22	38	38	24
dc9f716d344b84953f0214f2b40cad1a	0	26	24	0	33	27	0	25	0	135	0	11	0	0	0	0	0	33	0	44	17	0	0	0	23	438	13	7	10	508	406	0	0	0	30	0	4	0	22	462	4	11	0	0	0	0	0	5	16
300ab9038cd2bc457959a0218db391a7	0	95	0	0	197	0	11	0	21	324	0	0	0	0	0	0	35	72	0	107	0	0	67	32	0	0	0	0	0	99	3	32	17	48	0	0	0	54	0	154	0	0	11	36	114	0	0	8	0
460bdb848f25902fc618b4b5692462b3	0	0	0	0	0	0	0	0	0	0	0	0	25	40	0	0	17	0	0	82	0	0	0	0	0	0	0	0	0	0	0	0	0	0	0	0	0	0	0	0	0	0	0	0	63	0	0	0	0
e80376775580042f213e5bd8b640e475	0	0	46	0	0	0	0	0	0	46	54	53	45	43	32	0	0	0	0	227	36	33	48	0	0	29	0	13	0	159	49	49	71	29	0	0	26	34	0	258	0	40	67	0	0	0	29	0	0
36553982d303df983616f554ac92d888	0	0	0	0	0	0	0	0	0	0	0	0	0	0	35	0	26	0	0	61	0	0	0	0	0	0	0	0	0	0	0	0	0	0	0	59	0	0	0	59	0	0	0	0	0	33	0	0	0
172f842c9c0eaadbc9873aa355ee5413	0	0	0	0	0	0	0	0	0	0	0	0	0	0	114	73	44	0	0	231	0	0	0	0	0	0	0	0	0	0	0	0	0	0	0	57	0	0	0	57	0	0	0	0	93	40	0	83	45
3f0ea2e8605ee222725f4572d483d63b	0	20	12	0	29	20	20	14	0	115	17	0	0	0	0	0	91	94	0	202	0	38	21	0	0	23	0	0	0	82	29	0	22	0	0	0	0	14	9	74	16	11	79	0	0	32	0	0	34
bd01170506554fa8e3bbd3f357f2cdcc	0	0	0	0	0	0	0	0	0	0	0	0	0	0	0	0	0	0	0	0	0	0	0	0	0	0	0	0	0	0	0	0	0	0	0	0	35	0	0	35	0	0	0	0	0	0	0	0	0
1ed2267a44a855553f88199c3f6385d5	44	33	0	0	0	23	0	10	32	142	9	0	62	0	0	0	0	0	0	71	39	0	23	0	32	0	0	18	0	112	0	62	0	0	0	0	29	6	12	109	0	0	0	8	0	0	4	30	0
d382d735e3fa0a0f81a7e8fd3d157067	0	0	0	13	70	0	0	0	31	114	27	0	0	0	0	0	0	0	0	27	17	0	19	9	0	0	0	0	0	45	0	0	0	0	0	0	10	0	0	10	30	0	43	0	0	36	15	0	0
481348807de2fce06d201dde26cee6b2	0	37	0	41	0	0	0	20	16	114	0	0	0	0	0	0	0	0	0	0	0	0	0	0	0	0	0	0	11	11	0	0	0	0	25	0	0	0	37	62	479	0	0	927	0	0	100	0	0
3674777c6651c321451d31a1a9e9040b	0	0	0	0	0	0	0	0	0	0	59	59	0	0	43	0	0	0	0	161	0	0	70	0	0	58	0	0	0	128	56	0	74	0	0	0	0	0	0	130	0	0	82	0	0	0	0	0	0
e7c5b8d08747cf413a771d8835d05bee	0	0	0	0	0	21	0	0	0	21	0	0	0	0	0	0	0	0	0	0	0	0	0	0	0	0	0	0	4	4	0	0	0	15	0	0	0	0	0	15	0	0	0	0	28	0	0	0	0
6b861eaba9a2afe0643dc9c975c89df3	28	0	43	0	0	0	0	0	0	71	37	52	35	45	0	25	30	0	0	224	0	34	0	42	0	0	0	0	0	76	47	34	48	0	0	0	0	0	0	129	0	38	52	0	0	0	0	0	0
4b777b718774087514b9b6df57a29455	13	25	0	0	196	17	23	22	97	393	17	0	0	38	0	0	70	25	0	150	16	25	0	11	0	0	0	24	17	93	0	21	16	0	6	12	0	0	10	65	125	0	0	26	0	90	47	17	0
1d4cb606405fb67c14023e83313691a7	0	0	0	0	12	40	0	36	33	121	0	0	0	0	0	0	21	28	35	84	0	0	0	0	0	6	0	0	22	28	0	0	0	0	0	12	0	18	18	48	0	0	0	0	45	0	0	34	18
70bb47960cb2337a37fd84612cad1031	33	0	43	0	0	0	0	0	0	76	44	55	38	59	0	19	41	0	0	256	0	38	0	40	0	0	0	0	0	78	51	49	61	0	0	0	0	0	0	161	0	31	60	0	0	0	0	0	0
5a1ce69d97faa212ae4090e47fa9243c	15	22	21	0	36	64	43	45	95	341	14	26	19	0	4	0	6	65	29	163	25	63	150	46	0	27	27	41	19	398	23	5	42	0	0	0	0	7	8	85	34	44	33	19	34	0	0	0	17
55ea4e626112d2e43c73cb8bb765286a	0	16	0	0	0	0	0	0	0	16	0	0	0	6	0	0	0	0	0	6	0	0	0	0	0	0	0	0	0	0	0	0	18	0	0	0	0	0	0	18	0	0	11	9	0	0	0	0	0
6575a7ad07a596db15acca9e5d68f6a7	0	0	7	0	26	22	0	0	27	82	0	0	5	47	16	37	0	14	10	129	0	0	10	23	35	0	14	9	20	111	24	15	0	0	0	18	26	0	0	83	0	6	33	28	22	22	27	14	0
83f3b36de798bbaf42d196b6fdab4a0b	16	14	0	0	17	16	47	0	21	131	0	20	0	36	60	0	27	200	0	343	22	19	38	17	0	0	0	30	0	126	61	34	21	0	0	0	0	9	24	149	24	0	0	0	0	0	0	7	40
40c3c9ded7c5413b8ce407613820e5e0	0	0	0	0	0	0	0	0	0	0	192	0	0	29	0	0	0	0	0	221	14	0	0	0	0	0	0	0	0	14	0	26	0	0	0	0	0	0	0	26	187	0	19	0	0	0	0	0	0
b0bd14ff39685f008e94f8d25e4339b4	0	19	0	17	418	146	0	26	57	683	0	0	11	0	0	0	0	0	0	11	0	0	0	0	0	0	0	0	0	0	0	0	0	0	0	0	0	0	0	0	0	0	0	0	0	0	0	0	0
3298ee1c778fab3fc585c1c210285504	0	0	0	0	0	0	0	0	0	0	0	0	0	34	20	36	25	0	0	115	0	0	0	0	0	0	0	0	0	0	0	0	0	0	0	78	0	0	0	78	0	0	0	0	79	49	0	0	28
04b72c25473891a7aded8f08cf77e71a	0	0	0	0	0	25	33	19	47	124	0	0	37	0	0	0	25	0	0	62	0	0	28	18	0	0	0	0	0	46	0	0	0	0	0	0	0	18	0	18	0	0	0	0	0	0	0	0	0
5210619111d18cfa03d039d554968240	0	0	0	0	0	0	0	0	0	0	0	0	0	0	0	0	0	0	0	0	0	0	0	0	0	0	0	0	0	0	0	0	0	0	0	0	0	0	0	0	0	0	0	0	0	0	0	0	0
2b50b908cf8ae228c369af058c523482	0	0	0	0	15	0	0	0	0	15	0	0	19	13	0	0	0	0	0	32	0	22	20	11	16	4	0	0	0	73	0	0	18	0	0	0	0	0	0	18	29	0	34	0	0	56	22	0	0
fed8764a16d62e46869a6759e8be5438	0	0	0	0	67	0	0	81	0	148	0	0	0	0	0	0	0	0	0	0	0	0	0	0	0	0	0	0	0	0	0	0	0	0	0	0	0	0	0	0	0	0	0	0	0	0	0	0	0
2a33de8b1694259df95379427e3b3c9a	0	0	0	0	0	0	51	0	0	51	0	0	10	0	0	0	0	0	0	10	0	0	0	0	0	0	0	0	0	0	0	0	0	0	0	0	0	0	0	0	0	0	0	0	0	0	0	0	0
6909e8c54c4660d6a80f220822568446	216	65	0	94	301	72	117	35	76	976	0	0	0	0	0	0	0	0	0	0	96	33	127	130	25	58	0	0	0	469	0	0	0	0	0	0	0	0	15	15	109	0	38	0	0	0	13	0	0
3337155254cf60afd83603c2614d10f2	0	0	0	0	35	18	0	74	0	127	0	0	0	0	0	0	0	0	0	0	0	0	0	0	0	0	0	0	12	12	0	0	0	0	0	0	0	0	32	32	0	0	0	0	0	0	0	0	0
c4ee3d11cb95b1a950089bf23a2fa872	0	0	0	0	71	0	0	90	0	161	0	0	0	0	0	0	0	0	0	0	0	0	0	0	0	0	0	0	0	0	0	0	0	0	0	0	0	0	0	0	0	0	0	0	0	0	0	0	0
49ff7fd63620874eb62191d22f6fa8ec	0	0	0	25	71	58	24	13	49	240	14	0	0	0	0	0	0	0	0	14	0	0	0	102	0	0	16	0	0	118	0	0	0	0	0	0	0	0	0	0	454	0	0	0	0	0	0	0	0
ba7e95504a09b006a9ed00690d5fd203	0	71	0	0	0	0	0	0	0	71	0	0	0	0	0	0	0	43	0	43	0	0	27	0	0	0	0	0	0	27	0	0	0	0	0	0	0	0	0	0	0	0	0	0	32	0	0	0	0
da483f46dfb9e919b9ceab13b4ba1fd6	0	29	0	0	0	45	17	0	21	112	0	0	0	0	0	0	0	0	0	0	20	0	0	42	0	0	0	0	0	62	0	31	0	0	0	0	0	0	0	31	0	19	24	38	7	23	0	0	16
a48d609057729ab7350bb4213bccedb9	23	40	0	0	265	0	0	43	0	371	0	61	0	0	37	0	0	33	0	131	0	0	0	0	0	0	0	0	0	0	0	0	0	0	0	0	0	0	0	0	0	0	22	0	0	0	0	0	0
f0f83eb2a5e5f4609537e85a6d57c22a	0	0	0	16	33	0	0	28	0	77	0	0	0	0	0	0	0	0	0	0	0	0	0	0	26	16	0	19	29	90	0	0	14	8	0	0	0	5	0	27	0	0	0	0	0	0	0	11	16
085de3fadb6c6a0086a24318f2bbd31c	133	0	0	0	0	0	0	0	0	133	0	0	0	0	0	0	0	0	0	0	0	0	0	0	0	0	0	0	0	0	21	0	0	0	0	0	22	0	0	43	0	0	0	0	0	0	0	0	0
53130b8b0e5745b5c3c26af111d177db	0	0	6	0	220	0	0	31	68	325	11	0	0	37	0	15	81	31	17	192	0	14	14	3	23	24	0	19	0	97	0	0	21	0	0	0	0	0	0	21	145	8	15	0	0	81	39	15	11
b816f7df785cc20c77e2342b35dd5335	54	52	7	30	52	0	34	0	0	229	0	14	49	0	0	0	0	11	0	74	51	0	50	15	31	0	0	13	0	160	37	17	0	14	0	0	0	29	0	97	0	0	22	0	37	0	0	0	0
f52cd7a70bc514002ffc12ffe35d9873	15	0	29	0	0	0	0	0	0	44	31	32	20	0	0	10	0	0	0	93	24	27	26	28	9	30	7	14	0	165	24	16	23	21	0	17	25	11	13	150	14	0	39	15	0	6	20	0	0
fa11ff98e3b6fc64bbb7f45e708659a9	0	0	0	0	15	0	0	0	0	15	137	0	0	19	0	0	13	0	0	169	0	0	0	0	0	0	0	0	0	0	0	7	0	0	0	0	0	0	0	7	128	0	0	0	0	0	0	0	0
f350d9ea26d070d7c921c4b37cc0bbaa	0	0	22	26	30	60	56	47	86	327	0	24	29	0	0	0	0	65	0	118	28	85	172	38	0	33	30	39	24	449	0	0	0	25	15	26	0	0	0	66	0	41	0	0	29	32	30	12	0
299b1ecdbaaecb8b75e5bc4b01c56cff	0	37	0	0	79	63	24	0	51	254	12	0	0	0	0	0	15	0	0	27	0	0	0	110	0	31	30	9	0	180	0	0	0	0	0	0	0	0	0	0	463	0	0	34	0	0	0	0	0
71364575358f79fde0351a76840f3700	0	0	0	0	0	0	0	0	0	0	0	0	53	0	0	83	0	0	0	136	0	0	0	0	0	0	0	0	0	0	0	0	0	0	0	0	0	0	0	0	0	0	0	0	118	0	0	0	0
d21166b573bc7c8f35a552fda76e05ba	0	0	0	0	0	0	3	12	0	15	28	0	0	0	0	0	0	17	0	45	0	0	26	11	0	13	0	0	0	50	0	0	0	0	18	15	0	0	0	33	24	0	0	34	0	17	0	0	0
df40675bb6709f63ac5f2a4ab63a4047	0	0	11	0	33	0	0	0	22	66	0	34	22	0	26	36	0	9	27	154	0	0	27	0	0	0	0	7	0	34	112	9	63	103	0	6	49	0	12	354	0	0	0	21	0	0	0	0	0
cae670efafaea33ef8acff02d94c150d	0	0	0	0	0	0	16	0	0	16	17	0	0	34	0	0	0	0	0	51	4	0	0	0	0	0	0	0	0	4	0	0	0	0	15	0	0	13	17	45	0	0	17	0	0	0	0	20	15
0dfeca005f640831c71497f971723598	26	6	33	33	5	0	41	0	118	262	6	10	27	0	0	0	0	152	0	195	0	26	58	26	0	0	97	21	19	247	0	20	0	0	0	4	0	0	0	24	172	0	25	0	0	14	19	0	0
75f828a8932d0fc5dc910d8b0ece2884	25	0	24	0	0	0	0	0	0	49	29	33	28	0	0	9	0	0	0	99	19	28	30	18	10	29	6	15	0	155	28	25	46	25	0	18	16	21	12	191	19	0	39	15	0	18	19	0	0
b17e3ade5d990514767087189379d429	19	40	0	0	273	0	0	41	0	373	0	77	0	0	27	29	0	35	0	168	0	0	0	0	0	0	0	0	0	0	0	0	8	0	0	0	0	18	0	26	0	0	27	0	0	0	0	0	0
8f4cde708b52021311e0b6ec9315937d	0	10	13	0	0	0	0	0	0	23	15	22	15	28	11	9	10	0	0	110	21	0	17	19	0	12	0	0	0	69	14	0	23	0	0	0	16	13	0	66	10	0	0	0	0	0	10	0	6
11128261d7b691723295a3132225c631	98	0	0	12	0	0	35	36	247	428	0	0	20	0	0	0	0	0	16	36	0	0	0	43	0	0	18	11	25	97	0	25	0	0	0	14	0	33	0	72	48	7	52	0	0	18	0	0	0
9e1e0f9c6a29fd158d57b251689edbd9	0	0	0	0	0	41	0	0	114	155	0	0	33	60	14	0	26	0	0	133	0	0	31	0	31	0	7	0	0	69	60	0	0	0	0	27	0	0	22	109	0	0	0	0	0	32	0	0	31
e12dfd8d41760e773cb0ffa2d6d87f12	163	58	0	79	95	0	0	45	59	499	0	0	0	0	0	0	0	0	0	0	78	0	0	87	50	0	0	0	0	215	0	95	0	33	0	0	0	0	59	187	123	0	0	46	0	0	0	0	0
2d61272813e8d3277e992f149a5b65a7	67	114	15	33	41	0	0	0	0	270	29	0	0	0	11	0	0	0	2	42	0	59	0	11	12	0	0	0	10	92	17	0	7	0	0	0	0	0	7	31	0	15	120	13	0	27	46	26	15
46ebe06851392bd3bf0af0b8ec22ffdd	0	0	0	0	0	0	9	0	9	18	0	0	0	0	4	0	0	0	8	12	0	0	0	0	0	201	0	0	0	201	0	0	0	0	0	0	0	0	0	0	0	0	0	0	0	0	0	0	0
71143d99cf4a36a2f25a1b7182513070	0	0	0	0	0	0	0	0	0	0	0	0	0	0	0	59	0	0	0	59	0	0	0	0	0	0	0	0	0	0	0	0	0	0	0	46	0	0	0	46	0	0	0	0	71	0	0	0	0
9728b6f3d5b424e19aa419268c49c7f2	0	0	0	0	0	0	46	0	21	67	0	0	26	34	58	18	17	233	12	398	0	47	0	0	0	0	0	27	0	74	53	27	0	0	0	0	0	0	36	116	22	0	0	0	0	23	0	0	42
f87390aa3e976785c8f2544248973de9	28	0	29	0	0	27	36	27	124	271	0	0	0	0	0	17	0	117	32	166	27	27	59	34	0	19	112	22	0	300	0	19	7	9	0	0	0	0	0	35	153	13	22	9	0	0	19	0	4
2627c51d6a68638001d41b3460f94893	17	0	0	0	0	0	0	0	0	17	0	0	0	0	0	0	0	0	0	0	0	0	0	0	0	0	0	0	0	0	0	0	0	0	0	0	0	0	0	0	0	0	0	0	0	0	0	0	0
218f197b9b450c2a8c5672d556fd1a54	13	0	7	0	0	0	0	0	25	45	8	0	0	0	0	0	0	0	0	8	0	10	0	9	0	0	0	0	0	19	0	0	0	0	0	0	0	0	0	0	0	0	0	8	0	0	0	0	0
75a972c971a301ee008d9b996c68d0c7	15	7	0	0	0	43	0	0	34	99	0	0	0	39	5	10	0	18	0	72	2	21	2	11	6	0	0	12	0	54	0	0	0	28	23	14	0	0	0	65	0	0	0	0	0	0	0	0	37
36072a704b850b011ac972e8b24fa48d	0	0	0	0	0	0	0	0	0	0	0	0	0	0	0	0	0	0	0	0	0	0	0	0	0	0	0	0	0	0	9	0	0	0	0	0	0	0	0	9	0	0	0	0	0	0	0	0	0
8cfd29888c8c4e785dcf92ec03e81401	136	68	0	76	118	0	43	0	0	441	0	0	0	0	0	0	0	0	36	36	88	28	0	75	53	0	0	0	0	244	0	87	0	0	0	0	0	0	0	87	131	0	115	64	0	0	34	0	0
a7720c7348118039485b1b9d1a6e9e86	0	0	0	0	10	0	0	0	266	276	0	0	0	0	0	0	0	0	0	0	0	0	0	0	0	29	0	0	0	29	0	0	0	0	0	0	0	25	0	25	0	0	0	0	0	0	0	0	19
550ef7e620b61a9e575ef64fb28083d3	53	34	0	24	0	41	0	0	0	152	0	0	83	0	0	0	0	38	0	121	60	0	0	9	29	0	0	0	0	98	21	58	0	0	0	0	36	0	0	115	0	0	0	0	0	0	0	0	0
1c5f61427a96d56ead2a700d3497f37b	0	0	0	0	0	0	0	0	0	0	0	0	0	0	0	0	0	0	0	0	0	0	0	0	0	0	0	0	0	0	0	0	0	0	0	0	0	0	0	0	0	0	0	0	0	0	0	0	0
b81b292f9ce6c6699b051b2b1c06d63d	0	0	0	0	0	0	0	0	0	0	0	0	0	0	0	0	42	0	0	42	0	0	0	0	0	0	0	0	0	0	0	0	0	0	0	81	0	0	0	81	0	0	0	0	80	0	0	102	0
0bb3eb45c238a5fb359be934a59b6bdd	26	0	15	0	91	0	0	0	33	165	27	0	0	0	0	0	25	0	0	52	0	0	0	0	0	0	0	0	0	0	11	0	0	0	0	17	0	0	0	28	0	0	0	31	0	0	13	0	0
b0529d821cea86531bfe6ac29dc97c22	76	114	30	29	65	0	13	0	0	327	28	19	19	3	17	29	0	6	0	121	0	83	23	10	10	15	0	8	0	149	0	0	0	0	0	8	0	5	0	13	18	0	99	0	0	20	49	29	0
7ef377de3de84b6968502204cfa389c6	0	16	15	0	0	0	0	0	0	31	26	21	19	24	12	8	15	0	0	125	11	0	21	16	0	16	0	0	0	64	12	0	20	0	0	0	17	14	0	63	13	0	0	0	0	0	12	0	6
e3e8f6f40ac4bb228bd44c3d2c5bccba	0	18	0	0	0	0	0	0	0	18	0	0	0	0	0	0	0	0	0	0	0	0	0	0	0	0	0	0	0	0	0	0	0	0	0	0	0	0	0	0	0	0	0	0	0	0	0	0	0
a8fe37d451a9d5ed02dffa074a2eb382	0	0	0	0	0	0	0	0	0	0	0	0	0	0	0	0	0	0	0	0	0	0	0	0	0	0	0	0	0	0	0	0	0	0	0	0	0	0	0	0	0	0	0	0	0	0	0	0	0
a9504d32ecdffeb10c1b927eb2b8c104	0	0	0	0	0	0	0	0	0	0	26	0	0	0	0	0	0	0	0	26	0	0	0	0	0	0	0	0	0	0	0	0	0	0	0	0	0	0	0	0	0	0	0	0	0	0	0	0	0
a7f9f23c389f7de9b7796b0141b3ba98	46	0	34	64	47	49	54	28	0	322	0	21	0	0	0	0	0	0	0	21	0	46	0	50	81	55	0	19	55	306	75	38	0	112	86	0	0	34	0	345	0	20	0	35	0	0	42	0	0
7f0411e3d2bb979a663052f3319a06e2	0	11	0	0	59	0	15	44	0	129	0	0	0	0	17	0	0	26	0	43	0	0	0	0	0	0	0	0	20	20	0	0	0	0	0	0	0	0	21	21	24	15	0	17	0	0	0	0	0
991653d175994497f15122a736bc1ef8	0	0	0	30	0	0	33	0	0	63	0	0	0	0	0	0	22	0	0	22	0	0	0	0	0	0	0	0	16	16	8	0	0	0	0	0	0	0	0	8	0	0	0	0	0	0	0	0	0
fd30445b570e918bd60cfcc5aa8371ef	36	9	22	26	0	0	24	0	0	117	12	0	0	0	0	0	3	0	0	15	9	0	25	0	0	0	6	0	0	40	0	21	0	0	9	14	0	0	0	44	23	0	0	23	0	44	0	15	34
ba8f3fab97a9b02a8cdf9912589e8a96	0	0	0	0	0	0	0	0	0	0	0	0	0	0	0	0	0	0	0	0	0	0	0	0	0	0	0	0	0	0	0	0	0	0	0	0	52	0	0	52	10	0	0	0	0	0	0	0	10
57f761c7c4675dfe0802224b4c79bb14	0	26	0	0	426	162	39	26	57	736	0	0	0	0	0	0	13	0	14	27	0	0	0	0	0	7	0	0	0	7	0	0	0	0	0	0	0	0	0	0	0	0	4	0	0	0	0	0	0
b20dcba7661c877e2cd1a75372cd3685	0	32	0	0	0	0	0	0	0	32	0	0	0	0	0	0	0	0	0	0	0	0	0	31	0	0	0	0	0	31	0	0	0	0	0	0	0	18	0	18	264	0	0	488	0	0	71	0	0
4165da09904e9eeb4b6c1e1dc3112374	0	0	0	26	0	0	0	0	0	26	0	0	0	73	0	0	0	0	0	73	0	0	0	0	0	0	0	0	0	0	74	0	0	0	0	0	0	0	0	74	0	0	0	0	27	0	0	0	0
19f08e33dc222f044069fc5db123bd45	0	0	0	0	0	0	0	0	0	0	0	19	13	0	0	34	0	0	10	76	0	0	0	0	0	9	0	0	0	9	0	0	0	26	0	0	0	0	0	26	23	0	0	11	0	12	0	0	0
8ea420c8eb0d3a1c27e329ac8cfdc663	56	0	0	0	147	0	0	130	109	442	0	0	0	0	0	0	0	188	0	188	0	0	0	52	170	101	0	89	0	412	0	0	0	0	0	0	0	0	0	0	0	0	87	0	0	0	32	0	0
f17faca7968f357878220e5434c7c15b	0	0	0	0	0	0	0	0	0	0	0	0	0	0	0	0	0	0	0	0	0	14	0	0	0	0	0	0	0	14	0	0	0	0	0	0	0	0	0	0	0	0	0	0	0	0	0	0	0
ef07d968a15f1af16f57bde79ae67c40	0	0	0	12	0	0	12	30	45	99	0	0	0	0	0	32	0	31	31	94	0	0	21	0	0	0	4	15	0	40	13	0	0	37	11	0	18	17	0	96	0	0	0	0	44	11	14	36	0
acfd33c5ece8f0ebc9a45888e6824f50	0	0	0	0	0	0	0	0	0	0	0	0	0	0	118	76	0	0	0	194	0	0	0	0	0	0	0	0	0	0	0	0	62	0	0	64	0	0	0	126	0	0	0	0	94	42	0	79	58
25947360b878183362d73e9e2ecb9f16	0	0	76	0	0	0	0	0	0	76	69	0	0	0	0	0	0	0	0	69	0	61	0	0	0	0	0	0	0	61	0	0	0	0	0	0	0	0	0	0	0	0	0	0	0	0	0	0	0
e786d84e2e94d33110bfe6772076327b	0	0	0	21	0	0	0	0	0	21	34	19	0	53	0	0	0	0	0	106	0	0	0	0	0	0	0	0	0	0	0	0	0	0	14	0	0	0	0	14	45	0	0	0	0	0	0	0	0
1d8661beaeebde1724017a5c4b54d54e	0	0	0	0	0	0	0	0	0	0	29	0	0	85	0	11	35	0	0	160	0	0	0	0	0	0	0	0	0	0	0	0	0	0	0	0	0	0	0	0	62	0	0	29	0	16	0	0	0
b65be4d09779b06fde24860e018a30ef	0	0	0	0	0	21	0	0	0	21	0	0	22	24	0	0	0	0	14	60	0	0	0	0	0	0	0	16	0	16	24	0	16	27	0	0	0	0	0	67	0	0	0	7	0	0	4	0	0
c3caba3d57aea3cb9f3e9743571ff06b	0	0	0	29	0	10	51	8	0	98	0	0	0	0	0	0	7	0	0	7	0	0	0	16	0	0	0	0	0	16	0	0	0	0	0	0	0	0	0	0	22	0	20	0	0	0	29	12	0
983da91487c5d77fbe1fd3bda9e561db	0	0	0	0	0	0	0	0	0	0	38	0	0	83	0	0	33	0	0	154	0	0	0	0	0	0	0	0	0	0	0	0	0	0	0	0	0	14	0	14	72	0	0	0	0	0	16	0	0
c1c85f0797775bad59b55c1b7029de2e	0	84	0	0	0	0	0	0	0	84	0	0	0	0	0	0	0	30	0	30	0	0	36	25	0	0	0	0	0	61	0	0	0	0	0	7	0	0	0	7	0	0	0	13	22	0	0	0	0
ae95bc927be5b44154a949b6c2e3b522	39	0	0	0	0	0	0	0	0	39	0	0	0	0	0	0	0	0	0	0	0	0	0	0	0	0	0	0	14	14	0	0	0	0	0	0	0	0	0	0	0	0	0	0	0	0	0	0	0
9dbbff9f9e2d3388d61b536979e9f6d9	0	0	0	25	0	0	0	0	0	25	0	43	0	0	0	0	23	0	0	66	0	0	0	0	0	0	0	0	0	0	0	19	0	0	0	0	0	0	0	19	0	0	0	20	0	0	0	0	0
8d634f807e77152fb1ab5d8614ee8198	0	0	0	12	0	0	0	0	0	12	37	0	0	0	0	0	0	0	0	37	0	0	18	0	0	0	0	0	0	18	0	17	0	0	0	0	0	0	0	17	25	16	0	0	0	0	6	0	6
bf082f5d5d055d5952c3448c442196c8	0	0	0	0	0	8	0	0	0	8	5	0	0	0	0	0	0	0	0	5	0	0	0	0	0	0	0	0	0	0	0	0	4	0	0	0	0	8	0	12	0	0	0	0	0	0	0	11	19
c8da865b5d3f8df174321dc852e1e58c	0	0	0	36	27	0	0	0	0	63	41	0	22	0	0	48	6	0	29	146	0	0	0	0	0	0	0	0	9	9	106	0	64	82	14	0	48	0	0	314	36	8	0	0	0	0	0	0	5
f2b96e2b9e7ef0b0817d870ce43ec25d	0	0	0	0	13	0	0	0	0	13	123	0	0	22	0	0	0	0	0	145	0	0	0	14	0	0	0	0	0	14	0	0	26	0	0	0	0	0	0	26	105	0	28	0	0	0	0	0	0
044f4dec1fbe0dd484d4763e5cc66517	21	0	0	0	0	0	32	0	0	53	0	0	0	0	0	0	0	11	0	11	0	0	0	9	47	0	0	0	0	56	0	0	0	0	0	0	32	0	0	32	0	0	0	0	0	0	0	0	0
7245506530841fc58aa1d0c7c3280eef	15	0	0	0	0	25	15	0	0	55	0	0	17	44	0	0	0	15	0	76	0	0	0	0	0	0	0	0	0	0	0	0	0	20	0	0	0	0	0	20	13	0	0	0	0	10	0	0	0
8c9dc22239f64fb5617324b2b3b74d0c	0	0	0	0	65	0	0	84	0	149	0	0	0	0	0	0	0	0	0	0	0	0	0	0	0	0	0	0	0	0	0	0	0	0	0	0	0	0	0	0	0	0	0	0	0	0	0	0	0
8f9a7a707b6cef20fc928883b3cecda3	0	0	0	0	53	0	0	85	53	191	0	0	0	0	0	0	0	0	0	0	0	0	0	0	0	0	0	0	0	0	0	0	0	0	0	0	0	0	0	0	0	0	0	0	0	0	0	0	0
923a5f494451440cb9ccfd5f5207eec1	0	0	0	0	0	0	0	0	0	0	78	0	75	0	0	0	0	0	0	153	0	0	70	63	0	67	0	0	0	200	0	0	91	0	0	0	0	0	0	91	0	0	59	0	0	0	0	0	0
3214032ab2ddd2f25f2e8847bc58f048	0	0	0	38	28	0	31	0	72	169	0	0	0	0	0	0	21	15	0	36	0	0	0	0	0	0	10	0	0	10	0	0	0	25	20	33	0	0	0	78	0	0	0	0	0	26	0	0	0
c6b20caa7dc5fc1677908d31f558bc31	0	0	0	0	0	0	0	0	262	262	0	0	0	0	0	0	40	0	0	40	0	0	0	0	0	0	0	0	0	0	0	0	0	0	0	0	0	38	0	38	0	0	0	0	0	0	0	0	23
672fddf961276a8c1eeb68a58629e564	0	0	0	0	28	26	24	15	41	134	0	0	24	0	0	0	28	0	0	52	0	0	20	0	0	0	25	0	0	45	0	0	33	0	0	0	0	0	0	33	0	0	0	0	0	0	0	0	0
0ebd8173a0a88b81d86b8de90ddbfcff	0	0	0	0	0	0	0	0	0	0	0	0	0	0	0	0	0	0	0	0	0	0	0	0	0	0	0	0	0	0	0	0	0	0	0	0	0	0	0	0	0	0	0	0	0	0	0	0	0
2dbf402ad48bf40ef1e6546f3b2d11d7	0	0	0	0	0	0	0	0	0	0	0	0	22	0	0	0	0	0	0	22	0	0	0	0	0	0	0	0	0	0	50	0	0	35	0	0	0	0	0	85	0	0	0	0	32	0	0	0	0
ea6a8a098f4b4c6a458060923b9325d8	49	77	0	66	46	51	59	33	17	398	0	0	0	0	0	0	0	0	0	0	26	0	0	0	83	0	0	0	0	109	36	0	0	0	0	0	91	0	25	152	42	0	0	33	0	0	36	0	0
3e6a92b488dbac78896eeb3b003ebc08	0	0	0	25	0	0	0	0	0	25	0	0	0	19	0	13	0	0	0	32	0	13	0	0	0	0	0	0	0	13	0	0	0	16	0	0	0	0	0	16	21	0	27	0	0	0	0	0	18
bdc9d7bbb689097c39735e72b46934b3	0	0	0	17	0	0	30	0	0	47	58	0	0	0	0	0	0	0	0	58	0	0	0	0	0	0	0	0	0	0	0	0	0	0	0	0	0	0	0	0	48	0	0	0	0	0	0	0	0
9f551e6c57f3d3794d000dea23679843	0	0	0	0	0	0	0	0	0	0	0	0	0	0	0	0	2	0	0	2	0	0	0	0	0	0	0	0	0	0	0	0	0	0	0	0	0	0	0	0	0	0	0	0	0	0	0	0	0
16c39f1661354a4a7bfcf232eb6bf2bf	0	0	0	27	0	0	30	0	0	57	0	0	0	0	0	0	0	0	0	0	51	0	0	0	0	0	0	0	0	51	0	0	0	0	0	0	0	0	0	0	0	0	0	45	0	0	0	0	0
250bdd966cbd0aa611d935544ec13672	0	0	0	0	0	0	0	0	0	0	0	0	0	57	0	0	0	0	0	57	0	0	0	0	0	0	0	0	0	0	0	0	52	0	0	0	0	0	0	52	0	0	65	0	0	0	0	0	0
402450e1e1ba61f3c028d607e1b7a6d3	0	0	0	0	0	0	0	0	0	0	0	0	0	0	0	0	0	19	23	42	0	0	19	0	0	0	0	0	0	19	0	0	0	0	20	0	0	0	36	56	0	0	0	0	0	0	0	0	0
e8fbda59a709a61bb4daf11ded1a2e34	0	0	0	0	0	0	0	0	0	0	0	0	0	64	0	0	0	0	0	64	0	0	0	0	0	0	0	0	0	0	0	0	73	0	0	0	0	0	0	73	0	0	0	0	0	0	0	0	0
282acc68079c16d3661c7d39f8a65f72	0	0	0	0	0	0	0	0	0	0	0	54	0	0	0	0	0	0	0	54	0	36	50	0	0	0	0	0	0	86	0	0	41	0	0	0	0	0	0	41	0	0	51	0	0	0	0	0	0
2dacb5721cd9dc234d8676797fca1e9a	0	0	0	0	0	0	0	0	0	0	0	0	0	0	0	0	0	0	0	0	0	0	0	0	0	0	0	0	0	0	0	0	0	0	0	0	0	0	0	0	0	0	0	13	0	0	0	0	0
c682718316d72e9f2b76f81707321f35	0	0	0	0	18	30	49	35	0	132	0	0	0	0	0	0	12	0	0	12	0	2	0	0	23	0	13	28	24	90	0	0	0	0	0	6	0	29	26	61	0	0	0	0	0	10	25	0	28
4f177b95b188376f950273b9aa1e24eb	14	0	0	20	0	0	26	0	0	60	43	0	0	0	0	0	17	0	0	60	0	0	0	0	0	16	0	0	0	16	0	11	0	0	0	0	0	0	0	11	47	0	0	0	0	0	0	0	0
2e742477f0c8eb8bb6f6c40a5ee2ddbe	0	0	3	0	19	0	15	0	11	48	0	0	0	0	13	0	7	43	0	63	0	0	0	0	0	0	0	0	0	0	0	18	0	0	0	0	0	0	0	18	0	0	0	17	0	0	0	5	0
8628533a1d8fd1fe4b0975c5a1e7f7bf	0	0	0	0	0	0	0	0	0	0	0	0	0	0	0	0	0	0	0	0	0	0	0	0	0	0	0	0	0	0	0	0	0	0	0	0	0	0	0	0	0	0	0	0	0	0	0	0	0
989585aa1758da021db1b0dac1cc5059	0	0	0	0	0	0	34	0	0	34	0	0	0	0	0	0	20	16	0	36	0	8	17	0	28	0	0	0	0	53	0	0	0	0	21	0	0	0	4	25	0	5	0	22	0	6	0	0	0
654f12ec50b791ad9fc82b5f152d316f	0	0	0	0	0	0	0	0	0	0	0	0	0	0	0	0	0	0	0	0	0	0	0	0	0	0	0	0	0	0	0	0	0	0	0	0	0	0	0	0	0	0	0	0	0	0	0	0	0
202e9d5a63bf0b732ec3c57460d58339	28	0	0	0	0	0	21	11	0	60	0	0	0	35	0	0	11	0	0	46	0	0	0	15	0	0	0	0	0	15	0	0	0	0	0	19	0	20	15	54	0	0	0	0	0	14	0	0	0
9a0340294cd4d93f859afc22fbff9d45	0	9	0	0	0	15	0	0	0	24	0	62	9	0	0	0	15	0	0	86	0	0	0	0	0	0	0	0	0	0	0	0	0	0	0	0	0	0	0	0	0	0	7	0	0	0	7	0	6
1b129c16744a0340435af549c63ed3c8	0	0	0	0	0	0	0	0	0	0	0	0	0	0	0	0	0	0	0	0	0	0	0	0	0	0	0	0	0	0	0	0	0	0	0	0	0	0	0	0	0	0	0	0	0	0	0	0	0
c96048d0796eeda280e7c0948d93d598	0	0	0	0	0	0	0	0	0	0	0	0	0	0	0	0	0	0	0	0	0	0	0	0	0	0	0	0	0	0	0	0	0	0	0	0	8	0	0	8	0	0	0	0	0	0	0	0	0
eb5c5dc1093a844bfbfbd485469727d0	0	28	0	0	4	20	0	3	0	55	0	0	0	0	0	0	0	0	0	0	0	0	21	0	0	0	0	0	0	21	0	0	0	0	0	0	0	0	11	11	0	0	10	0	0	0	0	10	0
89729f456fb09f229f464ebce777246d	19	17	0	0	0	0	0	0	0	36	27	0	5	0	0	3	4	0	0	39	0	0	11	0	0	0	0	0	0	11	0	0	20	0	0	0	0	0	0	20	21	0	0	12	0	0	0	0	0
4cf0f03216443e393404d6fa1d934307	13	0	0	0	0	0	0	0	0	13	0	0	0	0	0	11	0	0	0	11	0	0	0	0	0	0	0	0	0	0	27	0	108	0	22	217	109	169	42	694	0	0	0	0	0	0	0	0	0
139ab00f27b7fe66c318523b8a2ff8c8	0	0	0	0	0	0	0	0	0	0	0	0	0	0	0	0	0	0	0	0	0	0	0	0	0	0	0	0	0	0	0	0	0	0	0	0	0	0	0	0	0	0	0	0	0	0	0	0	0
bb2784b3c36562ad654b6ad726336247	0	0	0	0	0	0	8	0	0	8	0	0	0	30	0	0	0	0	0	30	0	21	0	10	0	0	0	0	0	31	0	0	0	21	0	0	0	0	0	21	0	0	0	0	0	0	0	0	0
65acc3819fc2df7a4a1f30ec940a3291	0	44	74	0	0	0	0	0	0	118	0	0	0	0	0	0	0	0	0	0	0	0	0	0	0	0	0	26	0	26	45	0	78	0	0	0	0	0	0	123	0	67	0	0	0	0	0	0	0
c9e505172ac8eb43c55f380881c51bbd	0	0	0	0	0	0	0	0	0	0	0	0	0	0	0	0	0	0	0	0	0	0	0	0	0	0	0	0	0	0	0	0	64	0	0	0	0	0	0	64	0	0	0	0	0	0	0	0	0
86b4406a48102b1820f6c038c64a1b94	0	18	0	0	52	0	18	28	0	116	0	0	0	18	9	0	0	16	0	43	0	0	0	0	0	0	0	0	0	0	0	0	0	0	0	0	0	0	19	19	25	11	0	15	0	0	0	0	0
15108f6eb51edf12ce2f84f42505892f	0	0	0	26	0	0	0	16	0	42	29	0	0	24	0	0	0	0	0	53	0	0	0	0	0	0	0	0	0	0	0	0	0	0	0	0	0	0	0	0	22	0	11	0	0	0	0	0	0
5ad17a047ddefe3394ac766098dcb935	0	20	0	0	0	0	0	0	0	20	0	0	0	0	0	0	0	0	0	0	0	0	0	0	0	0	0	0	0	0	0	0	120	17	0	242	93	175	45	692	0	0	10	0	0	0	0	0	0
ba653409d408d3f113e6d8498ce46ae5	0	0	0	0	0	0	0	0	0	0	19	24	13	29	0	0	0	0	0	85	10	0	18	19	0	12	0	12	0	71	0	0	30	0	0	7	0	0	0	37	0	0	0	0	0	0	0	0	0
bb8d0e84738f9ce0058a57dc5c0d5cb3	0	0	0	0	0	12	50	0	0	62	0	0	0	0	0	0	0	29	0	29	0	0	0	0	35	0	24	42	0	101	0	0	11	0	0	0	0	0	0	11	0	0	0	32	0	0	39	0	0
b00fefdcec7b72744ac3f3895668e0ec	0	0	63	0	0	0	0	0	0	63	0	0	0	0	0	0	0	0	0	0	0	0	0	49	0	0	0	0	0	49	66	0	0	36	0	0	0	36	0	138	42	0	0	0	0	0	0	0	0
46fa91c4ac4fc4c067fb6c8cccd22681	0	30	0	0	0	27	0	0	11	68	34	23	0	0	0	7	0	0	0	64	0	0	0	14	0	24	0	0	0	38	21	0	0	0	0	0	0	8	0	29	0	0	23	0	0	0	8	0	7
121b77facaa19f7fa2418b105538785e	0	0	0	0	0	0	0	0	0	0	0	0	0	0	0	0	0	0	0	0	0	0	0	0	0	0	0	0	0	0	0	0	0	0	0	0	0	0	0	0	0	0	0	0	0	0	0	0	0
fca466b4fa788c5b533dfd1cf7840e70	0	0	0	0	31	0	39	20	71	161	0	0	0	14	7	23	0	0	21	65	0	0	0	15	0	3	0	24	0	42	9	0	0	19	15	0	31	14	18	106	0	0	0	7	35	0	4	23	13
4e98e8667b36512194e9e7115688f5e4	0	0	0	0	0	0	0	0	0	0	0	0	0	0	0	0	0	0	0	0	0	0	0	0	0	42	0	0	0	42	0	0	0	0	0	0	0	19	0	19	0	0	0	0	0	0	0	0	0
8b06e0d70f86870079660ae4d760a945	0	0	0	0	0	0	0	0	0	0	0	0	0	0	0	0	0	0	0	0	0	0	0	0	0	0	0	0	0	0	0	0	0	0	0	0	0	0	0	0	0	0	0	0	0	0	0	0	0
bea997cb6d7dbe14a1ef31fbff80d32f	0	0	0	0	0	0	0	0	0	0	7	0	0	14	0	0	0	0	0	21	0	0	0	6	0	0	0	0	0	6	0	0	9	0	4	0	0	0	0	13	0	0	0	0	0	3	0	0	0
3c16e74d697bcb3a2071ec152970c119	32	0	0	0	0	0	0	0	0	32	57	0	0	86	0	0	141	0	0	284	0	0	0	0	0	0	0	0	0	0	0	0	0	0	0	0	0	0	24	24	0	0	0	0	0	0	0	0	0
e3c1f5d2f6f5a1599554b973fe5dbe75	0	0	0	22	0	0	0	0	0	22	36	19	0	51	0	0	0	0	0	106	0	0	0	0	0	0	0	0	0	0	0	28	0	25	0	0	0	0	0	53	32	0	0	0	0	0	0	0	0
c54c24eb7a280c6e4f65858eaab900b5	0	0	0	0	0	0	0	0	0	0	0	0	0	24	0	0	30	0	0	54	0	0	0	0	0	0	0	0	0	0	0	0	0	0	28	11	0	0	0	39	0	0	0	0	0	0	0	0	0
6abdf2eac7643cdeec5e8fabc48277e7	0	27	0	63	0	0	0	49	0	139	0	0	0	0	0	0	0	0	0	0	0	0	0	0	55	53	0	43	0	151	0	42	0	56	24	0	0	17	65	204	0	0	0	0	0	0	45	0	0
9bf933f52198d6adceb4cc63f73ae291	0	0	0	28	0	0	0	18	0	46	0	0	0	0	0	0	0	0	0	0	0	0	0	0	0	0	0	0	0	0	0	0	0	10	0	0	0	0	0	10	0	0	0	10	0	0	0	0	0
32a6d9c2936949f398cbe88ea86772c7	0	0	0	0	0	0	0	0	0	0	0	0	0	0	0	0	13	0	0	13	0	0	0	0	0	0	0	0	0	0	0	0	0	0	0	20	0	0	0	20	0	0	0	0	0	8	0	0	21
96d61e70d79651bb3b9ac53785d284f0	9	0	0	0	0	0	0	0	0	9	0	0	0	0	0	0	0	0	0	0	0	15	10	10	0	0	0	10	16	61	0	21	0	0	0	0	0	0	0	21	0	0	30	0	0	5	0	0	18
540256037e96ccbe0cffdab4746f6ed2	33	0	0	0	0	17	0	0	0	50	0	0	0	59	0	0	0	21	0	80	0	0	27	0	0	0	0	0	0	27	62	11	0	0	0	0	0	0	0	73	0	7	0	0	0	0	0	16	0
905bc11aad87f683f190ca83435ec944	0	0	0	0	0	0	0	0	0	0	0	0	0	0	0	0	0	0	0	0	0	0	0	0	0	0	0	0	0	0	0	0	0	0	0	0	0	0	0	0	0	4	0	0	0	0	0	0	0
08b03f5cbe5e104920df39b4ca5f9da3	0	0	9	0	0	0	15	0	0	24	7	36	0	16	37	41	0	0	0	137	0	0	0	0	0	0	0	0	0	0	27	0	23	20	0	9	0	0	17	96	29	0	11	0	0	0	9	0	0
28f1d70b62b2e4dced14c8eb6cca8221	39	52	17	0	27	0	0	0	0	135	0	0	0	0	0	0	0	0	0	0	0	48	31	21	16	0	0	0	0	116	0	0	0	0	0	15	0	0	0	15	0	21	62	0	0	0	0	24	0
fc76ec0acb53325b657294f54be5ba2c	0	0	0	0	0	0	0	0	0	0	0	0	0	0	0	0	0	0	0	0	0	0	0	0	0	0	0	0	0	0	0	0	0	0	0	0	0	0	0	0	0	0	0	0	0	0	0	0	0
06409b4ed250d336bca804aeb0ab0017	0	0	0	0	0	53	56	85	85	279	0	0	0	0	0	0	0	0	0	0	0	0	0	53	146	0	0	84	0	283	0	53	0	0	0	0	0	72	0	125	0	0	0	0	0	0	0	0	0
d89fd1963e85e239cf2c415f07b79dee	0	0	0	31	0	0	0	40	0	71	0	0	0	0	0	0	0	0	0	0	0	0	0	0	0	0	26	0	0	26	0	0	14	0	0	0	0	0	0	14	0	0	0	0	0	0	0	0	0
7328cd9fb68ce12d8640a5e4323f89ca	0	0	0	0	0	0	0	0	0	0	0	0	0	0	0	0	0	0	0	0	0	0	0	0	0	0	0	0	0	0	0	0	0	0	0	0	0	0	0	0	0	0	0	0	53	0	0	42	0
f2080245dfda0ba7b0081753a8ffff6d	0	0	0	0	0	0	0	0	0	0	97	0	0	53	0	0	21	0	35	206	0	0	0	0	0	0	0	0	0	0	27	0	0	0	0	0	11	0	0	38	0	0	0	0	0	0	0	0	0
465bef7036d63c5bba9d5f1b62a6dd7e	48	0	0	0	0	0	0	0	0	48	0	0	22	32	0	0	0	13	0	67	0	0	33	0	45	0	0	18	0	96	0	0	0	0	0	0	0	0	0	0	0	0	0	6	0	0	0	0	0
41f3fe07a2973ef1331e8df759db80f1	0	0	0	0	61	0	44	50	86	241	0	0	0	0	0	0	0	81	60	141	0	0	0	0	0	0	0	52	61	113	0	0	0	0	0	0	41	0	0	41	0	0	0	0	0	0	16	0	0
21ad69e9b470eff6075689f4210174d9	0	0	68	0	0	0	0	0	0	68	67	73	0	0	0	0	0	0	0	140	0	0	0	0	0	56	0	0	0	56	0	51	0	0	0	0	0	0	0	51	0	0	0	0	0	0	0	0	0
4bee6143c0906417bb1df02e4f171734	0	0	0	0	0	0	0	0	0	0	10	32	15	21	0	0	0	0	0	78	15	0	15	15	0	16	0	11	0	72	0	0	26	0	0	16	0	0	0	42	0	0	0	0	0	0	0	0	0
e14d9340271d04ec117fcdffc7c84e5c	0	0	0	0	16	0	0	0	0	16	0	0	0	0	0	13	0	0	0	13	0	0	0	0	0	0	0	0	0	0	23	0	0	0	0	0	0	0	0	23	0	0	0	0	0	0	0	0	0
7a875a74d21011f97ad4a0e0770af56a	0	0	0	0	0	0	0	0	0	0	0	0	0	0	0	0	0	0	0	0	0	0	0	0	0	0	0	0	0	0	0	0	0	0	0	0	0	0	0	0	0	0	0	0	0	0	0	4	0
83220d90791fcfda4bbea1ef0f055403	0	4	0	0	0	14	0	0	25	43	0	0	0	0	0	0	0	0	0	0	0	0	0	0	0	0	0	0	0	0	0	0	0	0	0	0	0	0	0	0	0	0	0	0	0	0	0	0	0
6e4e803c5ba8aacdde38734bdaf6bc57	0	0	0	0	0	0	0	0	0	0	0	0	0	0	0	0	0	0	0	0	0	0	0	0	0	0	0	0	0	0	0	8	0	0	0	0	0	0	0	8	0	0	0	0	0	0	0	0	0
5c8ec4de925b7ab3947fb0658e9ca7af	0	0	0	0	0	0	0	0	0	0	0	0	0	0	0	0	0	0	0	0	0	0	0	0	0	0	0	0	0	0	0	0	0	0	0	0	0	0	0	0	0	0	0	0	0	0	0	0	0
58fdc1d8a82400cb900a7b3e9b6811c2	0	0	17	0	0	0	0	0	0	17	0	0	13	28	0	27	0	0	152	220	0	0	0	0	0	0	0	0	0	0	0	0	0	0	0	0	0	0	0	0	0	0	0	0	0	0	0	0	0
420d26fbe3d4d2eea9d16890c30425b7	0	0	24	0	0	0	0	0	0	24	33	24	29	25	0	0	0	0	0	111	0	0	22	21	0	0	0	0	0	43	15	15	30	0	0	0	0	0	0	60	0	0	31	0	0	0	0	0	0
dfb49a48238c7d9105d80c0108cf4751	0	0	0	0	0	0	0	0	0	0	0	0	0	0	0	0	0	0	0	0	0	0	0	0	0	0	0	0	0	0	0	0	0	0	0	0	0	0	0	0	0	0	21	0	0	5	0	0	0
adbc4656f8d10009f4494060e4e27fd4	0	0	0	0	0	25	0	0	0	25	24	0	0	25	11	0	0	10	0	70	0	0	0	0	0	0	0	0	0	0	22	0	10	36	0	0	0	0	0	68	0	0	0	0	0	6	0	0	0
5136141953986f3fb8e9ff36df903339	0	0	23	0	0	0	0	0	0	23	17	33	14	24	0	0	0	0	0	88	0	0	24	21	0	0	0	0	0	45	21	23	24	0	0	0	0	0	0	68	0	0	21	0	0	0	0	0	0
5db9dcfa5b0275246a9e0082deba4fe3	0	36	0	54	66	0	0	38	27	221	0	0	0	0	0	0	0	71	0	71	0	0	0	0	78	0	0	27	55	160	0	31	0	0	0	0	42	0	42	115	0	0	0	0	0	0	0	0	0
63218a04c57387ac7276c1c63e6fcc5d	31	50	0	31	33	0	10	0	0	155	0	10	11	0	12	19	0	0	20	72	0	59	0	0	0	0	0	0	0	59	0	0	0	0	0	0	0	0	0	0	0	0	57	0	0	21	41	30	16
1025128fc0377a1b4310ce5a2e5c8860	0	0	0	27	0	0	0	0	0	27	0	0	0	0	0	0	0	8	0	8	0	0	0	0	0	0	0	0	0	0	0	34	18	0	6	0	0	0	0	58	6	0	10	0	0	0	0	0	17
7c0ac0d0892152435d068cb2b640fd78	0	0	0	6	25	0	0	0	25	56	0	0	0	0	0	0	15	0	0	15	0	0	0	0	0	0	0	0	0	0	0	0	0	0	0	0	0	9	0	9	0	0	15	0	0	13	0	0	0
4c290136b7c738a3b272be814db6b99a	0	3	0	34	0	12	0	8	14	71	0	5	20	6	23	30	4	21	11	120	0	0	0	0	0	0	0	0	7	7	17	0	13	0	0	0	0	0	0	30	24	0	0	0	30	0	3	0	9
55b1731544a7e9b8c95550ba2bb67cfc	0	0	0	0	0	0	0	0	0	0	0	0	0	0	0	32	0	0	0	32	0	0	0	0	0	0	0	0	0	0	0	0	18	0	0	43	0	0	0	61	0	0	0	0	0	0	0	0	0
dae4b5d118d22ea997213db791b84cda	37	0	0	0	0	0	0	0	0	37	65	0	14	83	0	0	134	0	0	296	0	0	0	0	0	0	0	0	0	0	0	0	0	0	0	0	0	0	25	25	34	0	0	0	0	0	0	0	0
76bc5c2ffcf089a33f6b46e948c15688	0	0	0	0	0	0	0	0	0	0	0	0	24	0	0	0	0	0	5	29	0	0	0	0	0	0	0	0	0	0	41	0	0	42	0	0	0	0	0	83	15	0	0	0	29	0	0	0	0
538119b0b2b8e15dff095602498d728d	0	0	70	0	0	0	0	0	0	70	0	0	0	0	0	0	0	0	0	0	0	0	0	0	0	0	0	0	0	0	0	0	0	0	0	0	0	0	0	0	0	0	0	0	0	0	0	0	0
fcea40f6bf940a85335559478ee882b7	0	0	0	4	27	0	54	21	0	106	0	0	0	0	0	0	0	14	0	14	0	0	0	6	17	11	0	22	35	91	8	0	0	7	35	0	0	0	0	50	20	0	0	8	0	0	0	12	30
23f40a4818e0f3cea4cc3ae52bc84ac4	0	0	0	47	0	0	0	0	0	47	0	0	0	0	0	0	0	19	23	42	0	0	0	0	0	0	0	0	29	29	0	0	0	0	21	0	0	0	30	51	0	0	0	0	0	0	0	0	32
32e284f5e6f32ace90f026df51d01ff0	0	0	11	16	0	0	11	0	0	38	25	0	0	6	0	0	0	0	0	31	13	10	0	0	0	0	0	0	0	23	0	16	0	0	0	0	0	0	0	16	19	3	30	0	0	0	0	0	0
d2a2de7b5324bf346b203ae22fd038ab	9	0	0	0	0	0	0	0	0	9	11	17	17	17	0	0	10	0	0	72	0	8	6	0	0	0	0	0	0	14	0	0	13	0	0	0	0	0	0	13	0	12	11	0	0	0	0	0	0
096bb884430ecec76bc8f00c2f337a10	24	0	0	0	0	0	0	0	0	24	27	0	0	0	0	0	18	0	0	45	0	0	29	0	0	0	0	0	0	29	0	27	0	0	0	0	0	0	0	27	24	0	0	0	0	0	0	0	0
055a10791bad896beedca0de83fd17fd	0	0	0	0	0	0	0	0	0	0	0	0	0	0	0	0	0	0	0	0	0	0	8	0	0	0	0	0	0	8	0	0	0	0	0	5	0	0	0	5	0	0	0	0	0	0	0	0	0
ec6c25f331fb7f99ba25e91b30df8e3b	0	0	0	0	9	0	0	0	0	9	0	0	0	0	0	12	0	0	0	12	0	24	25	23	0	32	0	0	0	104	21	0	32	0	0	0	0	0	0	53	19	23	35	0	0	0	0	0	0
0d80ccc78eaf289cc1d522a8b1395bf2	24	0	0	7	0	0	0	0	0	31	0	0	0	0	0	0	0	0	0	0	0	0	0	0	0	0	0	0	0	0	0	0	9	0	0	0	0	0	0	9	36	0	0	0	0	0	0	0	0
74285d0632653a83c012bab4ab4aa00c	0	35	17	0	22	33	0	0	13	120	0	30	0	0	0	6	0	0	0	36	0	12	0	0	0	34	0	0	0	46	17	0	19	0	0	0	0	0	0	36	0	0	21	0	0	0	0	0	7
96e48a134cb0e1a056f9609ef1b68ccd	0	0	0	0	10	0	0	0	0	10	0	0	0	0	0	17	0	0	0	17	0	27	23	19	0	28	0	0	0	97	19	0	40	0	0	0	0	0	0	59	16	24	38	0	0	0	0	0	0
634eddba622a16b515909bdf28c77480	5	0	0	40	0	0	11	16	0	72	0	0	0	0	0	0	0	0	0	0	0	0	0	0	0	0	0	0	0	0	0	0	0	0	0	0	0	0	7	7	0	0	16	0	0	0	0	0	0
a77f83321030f6c3b0aff814825582b3	0	0	0	0	0	0	6	0	0	6	0	0	10	12	12	0	0	28	0	62	0	0	0	0	17	0	0	0	5	22	5	31	0	21	5	0	0	0	0	62	12	0	0	0	0	0	0	0	0
357699d9157d7cc038d5931c9a915598	25	0	0	0	0	0	0	0	0	25	0	0	0	0	0	0	0	14	0	14	0	0	0	0	0	0	0	0	0	0	6	0	0	0	3	0	42	0	8	59	12	0	0	0	0	0	0	0	0
3e7065bde45b29226728f131a8e165b6	0	0	0	0	0	0	0	0	0	0	0	0	0	0	0	0	0	7	0	7	0	0	0	0	0	0	0	0	0	0	0	0	0	0	0	0	0	0	0	0	0	0	0	0	0	0	0	0	0
7d0b82900291cb09473c8510f54885f9	10	0	0	0	0	0	0	0	0	10	14	20	18	19	0	0	7	0	0	78	0	17	10	0	0	0	0	0	0	27	0	0	18	0	0	0	0	0	0	18	0	11	24	0	0	0	0	0	0
82dbc180720bec8ce961edce9f1a4ca8	0	0	0	0	0	0	0	0	0	0	0	0	0	0	0	0	0	0	0	0	0	0	0	0	0	0	0	0	0	0	19	0	104	20	0	129	91	119	47	529	0	0	0	0	0	0	0	0	0
bf7d4373ecbe37b672f6bb1ca09b6c7a	0	13	21	0	0	0	0	0	0	34	0	0	11	0	0	0	0	0	0	11	14	0	0	0	0	0	0	0	0	14	12	9	0	10	0	14	12	0	0	57	0	0	0	0	0	12	0	0	0
b2c64e626658193403b2a1e18a67b473	0	0	0	28	0	0	26	0	0	54	0	0	0	0	0	0	0	0	0	0	0	0	0	0	0	0	0	0	0	0	0	0	0	0	0	0	0	0	0	0	0	0	0	0	0	0	0	0	0
0c74df28a2311d5067a60e4156bd8336	0	0	0	0	0	0	0	0	0	0	0	0	0	0	0	0	0	0	0	0	0	0	0	0	0	0	0	0	0	0	0	0	0	0	0	0	0	0	0	0	0	0	0	0	0	0	0	0	0
97301adddf4560991d3e3b956dd083e5	0	0	0	0	0	0	0	0	0	0	0	0	18	20	0	0	0	0	0	38	0	14	0	0	0	4	0	0	0	18	0	0	0	0	0	0	0	0	0	0	0	0	0	0	0	0	23	0	0
b18d53deb778c0861005642e2094b5f5	0	0	0	0	0	0	0	0	0	0	0	0	0	0	0	0	0	0	0	0	0	0	0	0	0	0	0	0	0	0	0	0	0	0	0	0	0	0	0	0	0	0	0	0	0	0	0	0	0
5f4df27d802c0b78427cc8b06a76bf84	0	0	0	0	0	0	0	0	0	0	0	0	0	0	0	0	0	0	0	0	0	0	0	0	0	0	0	0	0	0	0	0	0	0	0	0	0	0	0	0	0	0	0	0	0	0	0	0	0
ba8c2b36e32ae197d1839292991747f9	0	0	0	0	0	0	0	0	0	0	0	0	8	0	0	0	0	0	0	8	0	0	0	0	0	0	0	0	0	0	0	0	0	0	0	0	0	0	148	148	34	0	0	31	0	0	0	0	0
8555095c24b8640987feec5c507944d6	0	0	0	0	0	0	0	0	0	0	0	0	0	0	0	0	0	0	0	0	0	0	0	0	0	0	0	0	0	0	0	0	0	0	0	0	0	0	0	0	0	0	0	0	0	0	0	0	0
28860401b164d3dbf416494cca3930b1	0	33	0	0	0	0	0	0	45	78	0	23	0	0	0	0	0	0	0	23	0	0	0	0	0	0	0	0	0	0	0	0	0	0	0	0	144	0	48	192	0	0	0	0	0	0	0	0	0
9f08e1272fb0cf6378f2600f2a88ed6b	0	0	0	0	0	0	0	0	0	0	0	0	0	72	0	0	0	0	0	72	0	0	58	0	0	0	0	0	0	58	49	0	0	0	0	0	0	0	0	49	0	0	0	0	0	0	0	0	0
d369d5ca8df54d486c73586551e086f7	0	20	0	0	0	0	0	0	13	33	0	0	0	0	0	0	0	0	0	0	0	0	0	0	0	0	0	0	0	0	0	0	0	0	0	0	0	0	17	17	0	0	0	0	0	0	0	36	0
02ddbd65d42a088d60e8b685e0bd8c97	0	0	0	0	0	0	0	0	0	0	0	0	0	0	0	0	0	0	0	0	0	0	0	0	0	0	0	0	0	0	0	0	0	0	0	0	0	0	0	0	0	0	0	0	0	0	0	0	0
891b79e1ac15d32daadd7eeb9102e4f9	0	0	0	0	0	0	34	0	0	34	0	0	0	0	0	0	0	0	0	0	0	0	0	0	0	0	22	0	0	22	0	0	0	0	0	0	17	0	0	17	0	0	0	0	0	0	0	0	0
633bff25359f4db768933f90507af0d5	0	0	0	0	0	0	0	0	0	0	0	0	0	0	0	0	0	0	0	0	0	17	0	0	0	0	0	0	0	17	0	0	0	0	0	0	0	0	0	0	0	0	0	0	0	0	0	0	0
0199659434eb4899fd2923c46d0f43a9	0	0	0	0	0	0	0	0	0	0	0	56	53	0	0	24	0	24	0	157	0	0	0	0	0	0	0	0	0	0	19	0	0	0	0	0	0	0	0	19	0	0	0	0	0	0	0	0	0
37d992d00bd2eb13dc24eb7bcccbab62	9	0	0	0	0	0	0	0	0	9	23	0	5	0	0	0	0	12	0	40	0	4	5	7	0	0	0	0	0	16	0	0	0	10	0	6	0	0	0	16	0	0	4	0	0	4	0	0	6
b230476ec64ae7ba593e4e3d760c8288	0	16	28	0	0	0	0	0	0	44	0	0	9	0	0	0	0	0	0	9	8	0	0	0	0	0	0	0	0	8	19	16	0	9	0	23	19	0	0	86	0	0	0	0	0	12	0	0	0
13f05a3417e8a989fe6e52ddc90d4467	0	0	0	9	0	19	25	0	14	67	0	0	0	10	0	0	0	0	0	10	0	0	0	0	0	0	0	0	0	0	0	0	6	0	0	0	5	0	0	11	0	3	5	0	0	0	0	7	6
a4f7c5fae972f148753cd0cc220e8f3e	54	0	0	0	28	0	81	0	35	198	0	0	0	0	0	0	0	0	10	10	0	0	42	43	0	0	39	0	0	124	0	0	0	0	0	0	0	0	0	0	0	0	0	0	0	0	0	0	0
c5c3eb212ecc7b7954eccbede56f829c	0	0	0	0	0	0	0	0	0	0	84	0	21	55	0	0	24	0	41	225	0	0	0	0	0	0	0	0	0	0	23	0	15	8	0	0	0	0	0	46	0	0	11	0	0	0	0	0	0
bb8df1739d657fd3e060ae60770a31fe	0	0	0	6	0	0	7	11	0	24	0	0	0	0	0	3	26	0	0	29	0	0	0	0	0	0	0	0	0	0	0	0	6	0	0	0	0	0	0	6	0	0	0	0	0	0	0	0	6
9d893551677295440fad0ccdcb8addc9	0	0	0	0	0	0	31	0	0	31	0	0	0	0	0	0	0	0	0	0	0	0	0	0	0	0	0	0	0	0	0	0	0	0	0	0	0	0	0	0	0	0	0	0	0	0	0	0	0
6b4c6437a190e64ed8b9d17dce6cd80e	0	0	0	0	0	0	0	0	0	0	0	0	29	0	0	0	0	0	0	29	0	0	0	0	0	0	0	0	0	0	0	0	0	14	5	0	0	0	0	19	0	0	0	0	14	0	0	0	0
c11fcf64bb610412363c981544393516	0	0	0	58	67	0	54	61	68	308	0	0	0	0	0	0	0	89	0	89	0	0	0	0	67	0	0	0	0	67	0	0	0	0	0	0	0	0	0	0	0	0	0	0	0	0	0	0	0
63cf31824ff65035dbbf2233064fa5a1	0	0	0	0	0	0	0	0	0	0	0	0	0	0	0	0	0	0	0	0	0	0	0	0	0	0	0	0	0	0	0	0	0	0	0	0	0	0	0	0	0	0	0	0	0	0	0	0	0
ccac431f22cfee6982cfe86e0526fb1a	15	0	18	0	53	0	19	0	0	105	9	0	0	0	0	0	0	0	0	9	0	0	37	0	0	0	0	0	0	37	0	0	0	0	0	0	0	5	0	5	0	0	0	0	0	0	0	0	0
7324134fa70b5f27cd670e1aff7204ab	0	0	0	14	0	0	0	0	0	14	0	0	0	0	0	0	0	0	0	0	0	0	0	0	40	0	0	15	0	55	0	0	0	0	0	0	28	10	0	38	0	0	0	0	0	0	0	0	0
5b63b60a4d6366978056b5687331cf17	0	0	17	0	0	0	0	0	0	17	0	0	15	12	0	0	0	0	0	27	0	15	22	0	0	0	0	9	0	46	11	13	16	0	0	8	10	0	0	58	0	25	28	0	0	0	0	0	0
8a6c1fe3c3d26a1707ef8ff73da54f91	0	0	0	16	0	13	14	0	24	67	0	0	0	0	0	20	0	0	0	20	0	0	0	15	25	25	9	0	0	74	0	0	0	23	0	8	0	0	7	38	0	0	0	22	22	0	0	0	0
13a90e47d070f0d9e5c13976b8ebfc67	0	0	0	0	0	0	0	0	0	0	0	0	0	11	0	0	0	0	0	11	0	0	0	0	0	0	0	0	0	0	0	0	0	0	0	0	0	0	0	0	0	0	0	0	0	0	0	0	0
9580f203f27bec14d0688c29e52a49c9	0	0	0	0	0	0	0	0	9	9	0	0	0	0	0	0	0	0	0	0	0	0	0	0	0	0	0	0	0	0	0	0	0	0	0	0	0	0	3	3	0	0	0	0	0	0	0	0	0
8353b7b46f0cc3f5ab5c09976b33c576	0	0	0	0	0	0	0	0	0	0	0	0	0	0	0	0	0	0	0	0	0	0	0	0	0	0	0	0	0	0	0	0	0	0	0	0	0	0	0	0	0	0	0	0	45	0	0	0	0
bbd0dd9c4242e75cc0774c8ea3420806	6	18	0	0	0	0	0	0	0	24	17	0	0	0	0	25	0	0	194	236	0	0	0	0	0	17	0	0	0	17	0	0	4	0	0	0	0	0	0	4	5	0	0	0	0	0	0	0	0
698114c4859c15ffde6264d7876c2883	0	0	0	0	0	0	0	0	0	0	0	0	0	0	0	0	0	0	0	0	0	0	0	0	0	0	0	0	0	0	0	0	0	0	0	0	0	0	0	0	0	0	0	0	0	0	0	0	0
405ad3823f0de085dd2e4af77e8410b7	0	0	0	0	0	0	0	0	0	0	0	0	0	0	0	0	0	0	0	0	0	0	0	0	0	0	0	0	22	22	0	0	0	0	0	0	0	0	0	0	0	0	0	0	0	0	0	0	0
43fb2a1d33b1423a4d6431eab6a224f7	0	0	0	0	0	0	0	0	0	0	66	0	0	28	0	0	0	0	0	94	0	0	0	0	0	0	0	0	0	0	0	0	13	0	0	0	0	0	0	13	0	0	0	0	0	0	0	0	0
f3a5cf06e5eb0a44921da5c80c031293	0	0	0	0	0	0	0	0	0	0	11	0	0	19	0	0	0	0	0	30	6	0	0	8	0	0	0	0	0	14	0	0	0	26	0	0	0	0	0	26	29	0	0	0	0	0	0	0	0
1415aa91bbbda12b4603ef12b03d263a	0	0	0	0	0	28	0	0	0	28	0	0	0	0	0	0	0	12	0	12	0	0	0	0	0	0	0	0	0	0	0	0	0	0	0	0	0	0	0	0	0	0	0	0	0	0	9	0	0
cb36cafcfda1c4cafcc2955fad3b2991	0	0	0	0	0	0	0	0	0	0	0	0	0	0	11	0	0	0	0	11	0	0	0	0	0	0	0	0	0	0	0	0	0	0	0	0	0	0	0	0	0	0	0	0	0	0	0	0	0
c957c779f68d251c30a25030e3bf2385	0	0	0	0	0	0	0	0	0	0	0	0	0	0	0	0	0	0	0	0	0	0	0	0	0	0	0	0	0	0	0	0	0	0	0	0	0	0	0	0	0	0	0	0	0	0	0	0	0
6d804ed0e9040545a0c9049ff11c568d	0	0	0	0	0	0	24	0	0	24	0	0	0	0	0	0	0	0	0	0	0	0	0	0	0	11	0	0	0	11	0	0	0	0	0	0	0	0	0	0	0	0	0	0	0	0	0	0	0
a11647ea5b421713ef1c87555086577e	0	0	0	0	0	0	0	0	0	0	0	0	0	0	0	0	0	0	0	0	0	0	0	0	0	0	0	0	0	0	0	0	132	0	0	163	90	98	0	483	0	0	0	0	0	0	0	0	0
762f54e25739d362746fa10ed3064863	0	0	0	0	0	0	0	0	0	0	0	0	0	0	0	0	0	0	0	0	0	0	0	0	0	0	0	0	0	0	0	0	0	0	0	0	0	0	0	0	0	0	0	0	0	0	0	0	0
8e63c47ba0db599bf3d693177df8ca17	0	0	0	25	0	0	21	0	0	46	0	0	0	0	0	0	0	0	0	0	0	0	0	0	0	0	0	11	0	11	0	0	0	0	0	0	0	0	0	0	15	0	0	0	0	0	0	0	0
9e25bf2ad391afe36b978d4a29a49bb1	0	0	0	63	37	0	43	44	0	187	0	0	0	0	0	0	0	65	0	65	0	0	0	30	76	0	0	0	41	147	0	0	0	0	0	0	0	0	0	0	0	0	0	0	0	0	0	0	0
450ffcf911a42457aa836ef6db5afb5e	0	0	8	0	0	0	0	0	0	8	21	0	0	0	0	0	0	0	0	21	0	0	0	0	0	0	0	0	0	0	0	0	0	0	0	0	0	13	0	13	0	0	0	0	0	0	0	0	0
b3a88888f37cab592cc1168d85eb47ba	0	0	7	0	0	0	0	0	0	7	0	0	0	0	0	0	0	0	0	0	0	0	0	0	0	0	0	0	0	0	0	0	0	0	0	0	0	0	0	0	0	0	0	0	0	0	0	0	0
2e962151c7a3f71f7a09756748443189	0	0	0	0	0	0	0	0	0	0	0	0	0	0	0	0	0	0	0	0	0	0	0	0	0	0	0	0	0	0	7	0	0	0	0	0	0	10	0	17	0	0	0	0	0	0	0	0	0
5918466d89aec58096186c4eb1e4a738	0	21	0	0	0	30	0	0	43	94	7	12	0	0	0	14	0	5	0	38	0	0	0	13	0	20	0	0	0	33	7	0	0	0	0	0	0	0	0	7	0	0	11	0	0	0	8	0	3
e8fa589be4a81c77a7453cac6c57c795	0	0	0	16	0	0	0	3	0	19	0	0	0	0	0	0	0	0	0	0	0	0	8	0	0	0	0	0	0	8	0	0	0	0	0	0	0	0	0	0	26	0	10	7	0	0	0	0	0
8687120f05431279a86b95e7a7fc44a1	45	0	0	0	0	0	0	0	0	45	0	0	0	0	0	0	0	0	0	0	0	0	0	0	0	0	0	0	0	0	2	0	0	0	0	0	3	0	0	5	0	0	0	0	0	0	0	0	0
97df9934e84ceab5ef419433e1e7208b	0	0	11	0	0	0	0	0	0	11	0	0	12	18	0	0	0	0	0	30	0	25	17	0	0	0	0	15	0	57	12	11	14	0	0	10	12	0	0	59	0	16	22	0	0	0	0	0	0
8cdb7431947c5af4f7bc3b97155b3185	0	0	0	0	0	0	0	0	0	0	0	0	0	0	0	0	0	0	0	0	0	0	0	0	0	0	0	0	0	0	0	0	0	0	0	0	0	0	0	0	0	0	0	0	0	0	0	0	0
108028d2de234a608542215759016548	0	0	0	0	0	0	0	0	0	0	0	0	0	0	0	0	0	0	0	0	0	0	0	0	0	0	0	0	0	0	0	0	0	0	0	0	0	0	0	0	0	0	0	0	0	0	0	0	0
7fe443908c3125e9d6614720ef57562b	38	32	0	0	0	0	0	0	0	70	0	0	11	0	0	0	0	0	0	11	25	10	0	0	0	0	0	0	0	35	9	0	0	0	5	0	0	0	0	14	9	0	0	0	0	0	0	0	0
b722dc6559db3b9d5e67d1edeb0efa75	0	0	0	0	0	0	0	0	0	0	0	0	0	0	0	0	12	0	0	12	0	0	0	0	0	0	0	0	0	0	0	0	0	0	0	23	0	0	0	23	0	0	0	0	0	14	0	0	16
3b473fc1dc242f0a312f8964d3655ae3	0	0	0	0	0	0	0	0	0	0	0	0	0	0	0	0	0	0	0	0	0	0	0	0	0	0	0	0	0	0	0	0	0	0	0	0	0	0	0	0	0	0	0	0	0	0	0	0	0
3ff093cb923fc7813d1abbcd8850ccf9	0	0	0	7	0	0	0	0	0	7	0	0	0	0	0	0	0	0	0	0	0	0	0	0	0	0	0	0	0	0	21	0	0	20	0	0	0	0	0	41	30	0	0	0	0	0	0	0	0
0cec6b301b29237ca392dec46f6f110b	0	0	0	9	22	0	0	0	0	31	0	0	0	0	9	0	0	0	9	18	0	0	0	0	0	0	0	0	0	0	0	0	0	0	0	0	0	0	0	0	0	0	0	0	0	7	0	0	0
cce97191b443dee2006a10cf96d046a6	20	0	0	0	16	0	17	0	0	53	0	0	0	0	0	0	0	44	0	44	4	4	8	6	6	8	0	0	0	36	0	4	0	0	8	10	11	5	0	38	0	0	0	0	26	6	0	0	0
31619ec0ce892ade5db08d45a371d3c9	0	0	0	0	0	0	0	0	0	0	0	0	0	0	0	0	0	0	0	0	0	0	0	0	0	0	0	0	0	0	0	0	0	0	0	0	0	0	0	0	0	0	0	0	0	0	0	0	0
b0cfc7b6d89fd6b2ce6edd2ed618fc43	0	0	0	0	0	0	0	0	0	0	0	0	0	0	0	0	0	0	0	0	0	0	0	0	0	0	0	0	0	0	0	0	0	0	0	0	0	0	0	0	0	0	0	0	0	0	0	0	0
3545469ffcfba8140dd3eb313dc2c0d8	0	0	0	0	0	0	0	0	25	25	0	0	0	26	0	0	0	0	0	26	0	0	0	0	0	0	0	0	0	0	0	0	0	0	0	0	0	0	0	0	0	0	0	0	0	18	0	0	0
299b2e62dd1413bc242abe955163c92c	0	0	0	0	0	0	0	0	0	0	0	0	0	0	0	0	0	0	0	0	0	0	0	0	0	0	0	0	0	0	0	0	0	0	0	0	0	0	0	0	0	0	0	0	0	0	0	0	0
e414a4e4dd90804136ab517e225d498d	0	0	0	0	0	0	0	0	0	0	0	0	0	0	0	0	0	0	0	0	0	0	0	0	0	0	0	0	0	0	0	0	0	0	0	0	0	0	0	0	0	0	0	0	0	0	0	0	0
988f6094b28999e94ae08d1fb104adb6	0	0	0	18	30	0	0	20	0	68	0	0	0	0	0	0	0	0	0	0	0	0	0	0	0	0	0	21	0	21	0	6	0	0	16	0	0	0	8	30	0	0	0	0	0	0	0	28	15
ee54c4e91dacec15fbb1f34d9e5df122	0	0	12	0	30	0	15	0	0	57	0	0	0	0	0	15	0	0	0	15	0	0	0	0	0	0	0	0	0	0	0	0	0	0	0	0	0	0	0	0	0	0	15	0	29	0	0	0	0
e1bbb9198f355e080201b32030cb0382	0	0	0	0	0	25	0	0	0	25	0	0	0	28	0	0	0	0	0	28	0	0	0	0	0	0	0	0	0	0	0	0	0	0	0	0	0	0	0	0	0	0	0	0	0	0	0	0	0
94072ab06ed779003c844b8655c3abe2	0	0	0	0	0	0	0	0	0	0	0	19	34	0	3	0	0	0	0	56	0	0	0	0	0	0	0	0	0	0	53	0	0	7	8	0	0	0	0	68	0	0	0	0	0	0	0	0	0
d208dd64307ab7c0b373072640df51aa	0	0	0	0	0	0	0	0	0	0	0	0	0	0	0	0	0	0	0	0	0	0	0	0	0	0	0	0	0	0	0	0	0	0	0	0	0	0	0	0	0	0	0	0	0	0	0	0	0
5c3917e8e1cbfccd8c6399d41871f8d1	0	0	0	0	78	0	56	0	41	175	0	0	0	0	0	0	0	0	0	0	0	0	32	27	43	0	0	0	0	102	0	0	0	0	0	0	0	0	0	0	0	0	0	0	0	0	0	33	0
834673c7a7bf99874e9d68ee17f58bc2	0	0	0	0	0	0	0	0	0	0	0	0	0	0	37	46	0	40	71	194	0	0	0	0	0	0	0	0	0	0	0	0	0	0	0	0	0	0	0	0	0	0	0	0	0	0	0	0	0
3e6fbf413a507b66675fe1e36cb123c6	0	0	0	0	0	0	0	0	0	0	0	0	0	0	0	0	0	0	0	0	0	0	0	0	0	0	0	0	0	0	0	0	0	0	0	0	0	0	0	0	0	0	0	0	26	0	0	28	0
0c293510d3d3d7a7d981bda9cb73643e	0	0	0	0	0	0	0	0	0	0	0	0	0	0	0	0	0	0	0	0	0	0	0	0	0	0	0	0	0	0	0	0	0	0	0	0	0	0	0	0	0	0	0	0	0	0	0	0	0
9c464bb0ef31b189a0f8eea28d8b888f	0	0	13	0	0	0	0	0	0	13	0	0	0	0	0	0	0	0	0	0	0	0	0	0	0	7	0	0	0	7	11	0	14	0	0	0	0	0	0	25	16	0	9	0	0	0	0	0	0
3561b9a37067ce9dda0874415160d35a	0	0	0	0	0	0	0	0	0	0	0	0	0	0	0	0	0	0	367	367	0	0	0	0	0	0	0	0	0	0	0	0	14	0	0	0	0	0	0	14	0	0	0	0	0	0	0	0	0
8a1d4ec0c71e1f068e520d6957e8566a	0	76	0	0	0	0	0	0	0	76	0	0	0	0	0	0	0	0	65	65	0	0	0	0	0	0	0	0	0	0	0	0	0	33	0	0	0	0	0	33	0	0	0	0	0	0	0	0	0
093c5e7e72c208a1b5122e0f57fff92c	0	0	0	0	0	0	0	0	0	0	26	0	0	0	0	0	0	0	0	26	0	0	0	0	0	0	0	0	0	0	0	0	14	0	0	0	0	0	136	150	32	0	0	0	0	7	25	0	0
1266bddafa20237e0e27a878a056b1fc	23	0	0	11	0	23	0	0	0	57	0	0	3	0	0	0	0	0	0	3	6	0	0	0	25	0	0	0	0	31	11	24	8	0	4	0	0	0	0	47	4	0	10	0	0	0	0	0	0
5118d93de6e3162589feef3248af4c9e	0	0	0	0	0	0	0	0	0	0	0	36	55	0	27	36	0	24	0	178	0	0	13	0	0	0	0	0	0	13	0	0	35	17	0	0	0	0	0	52	13	0	0	0	0	0	0	0	0
3458e47c4eb94d8302a809850fa09dd7	0	0	0	0	60	0	30	36	0	126	0	0	0	0	0	0	0	57	0	57	0	0	0	0	49	0	0	0	28	77	0	0	0	0	0	0	0	0	0	0	0	0	0	0	0	0	0	0	0
08c40583a83f77703353112849714295	0	0	0	0	0	0	0	0	0	0	0	0	0	0	0	26	0	0	0	26	0	0	0	0	0	0	0	0	0	0	0	0	0	0	0	0	0	0	0	0	0	0	0	0	0	0	0	0	0
52840c1c2677a99988274095e74a23c6	0	0	0	0	54	0	45	32	0	131	0	0	0	0	0	0	0	59	0	59	0	0	0	0	75	0	0	0	18	93	0	0	0	0	0	0	0	0	0	0	0	0	0	0	0	0	0	0	0
13c83b72257e3f94e242ecb7f17547b8	0	77	0	0	38	0	0	0	0	115	0	0	0	0	0	0	0	0	0	0	0	96	0	0	0	0	0	0	0	96	0	0	0	0	0	0	0	0	0	0	0	0	66	0	0	0	0	0	0
9f6bd3e344181e54bf1dd88c428dfb0f	0	31	0	0	0	0	0	21	0	52	0	0	0	24	0	0	34	0	0	58	20	0	0	0	0	0	0	0	0	20	0	0	0	0	0	0	0	0	0	0	0	0	0	0	0	0	0	0	0
cab693c637469463f5527fac98266e4c	0	0	0	0	0	0	0	0	0	0	0	0	0	0	0	0	6	0	0	6	0	0	0	0	0	0	0	0	0	0	10	0	0	0	0	0	0	0	0	10	0	0	31	0	0	0	0	0	0
49ab58bb802f546107c07cbb2ecfc939	0	0	0	0	0	0	0	0	0	0	0	0	0	0	0	0	0	0	0	0	0	0	0	16	0	0	0	0	0	16	0	0	0	0	0	0	0	0	0	0	0	0	0	0	0	0	0	0	0
fa1481a18bf81ad68a163abd786ebdc8	0	0	0	0	0	13	0	13	0	26	0	0	14	0	0	17	0	14	0	45	0	0	0	9	0	0	0	0	0	9	0	0	0	0	0	0	0	0	0	0	0	0	0	0	0	0	0	0	0
cb34f9fdf7d55df15e824228a4b6ba05	0	0	0	0	0	0	0	0	0	0	0	0	0	0	0	0	0	0	0	0	0	0	0	0	0	0	0	0	0	0	0	0	0	0	0	0	0	0	0	0	0	0	0	10	0	0	0	17	0
4b8267aa623cc256b23457d1674c3916	0	0	0	0	0	0	0	0	0	0	0	0	0	0	0	0	0	0	0	0	0	0	0	0	0	0	0	0	0	0	0	0	0	0	0	0	0	0	0	0	0	0	0	0	0	0	0	0	0
7bc591f121016f813424f3154f61e74d	0	0	0	0	0	0	0	0	0	0	0	0	0	0	0	0	0	0	0	0	0	0	0	0	0	0	0	0	0	0	32	0	26	25	0	0	0	0	22	105	0	0	0	0	0	0	0	0	0
b5639edb3983272dfc78dc90c4c668a2	0	0	0	0	0	0	0	0	0	0	0	0	0	0	0	0	0	0	0	0	0	0	0	0	75	0	0	0	0	75	0	40	0	0	0	0	0	0	0	40	0	0	0	0	0	0	61	0	0
c14102e9853304473356dc3e06269b42	0	0	0	0	0	0	0	0	0	0	0	0	0	0	0	0	0	0	0	0	0	0	0	0	0	0	0	0	0	0	0	0	0	0	0	0	0	0	0	0	0	0	0	0	0	0	0	0	0
2b5ba9301522977159d501e455658137	0	0	0	0	0	0	0	0	0	0	0	0	0	90	0	0	0	0	0	90	0	61	0	0	0	0	0	0	0	61	57	0	0	0	0	0	0	0	0	57	0	0	0	0	0	0	0	0	0
803b88c023844e80a690315e2d51ad17	0	0	0	0	54	0	11	33	68	166	0	0	0	0	0	0	0	0	0	0	0	27	0	0	0	0	0	0	16	43	0	0	0	0	0	0	0	0	0	0	0	0	0	0	0	0	0	0	0
1007ff3aa633c3ce8494a7da9138df3f	0	0	0	0	0	0	0	0	0	0	0	0	0	0	0	0	0	0	354	354	0	0	0	0	0	0	0	0	0	0	0	0	0	0	0	0	0	0	0	0	0	0	0	0	0	0	0	0	0
52dcedbd69bc988715ac5de66e557833	25	0	0	35	25	16	0	8	0	109	0	0	0	0	0	11	11	24	18	64	0	0	0	0	19	0	0	0	0	19	0	0	0	0	0	0	0	0	0	0	0	0	0	0	0	0	0	0	0
22865865ce46b058adc8d410b5d37377	0	34	0	0	0	0	0	0	0	34	0	0	0	0	0	0	0	12	0	12	0	0	0	0	0	0	0	0	0	0	0	0	0	0	0	0	0	0	0	0	0	0	0	15	0	0	0	0	0
d864a9878c6b10d598daa078d52a8af2	0	0	0	0	0	0	0	0	0	0	11	0	0	0	0	0	0	0	0	11	0	0	0	0	0	0	0	0	0	0	0	0	0	0	0	9	0	0	0	9	0	0	0	0	0	0	0	0	0
1efec969cc86b573ad72bdec96ef323b	0	0	0	80	70	0	0	0	91	241	0	0	0	0	0	0	0	0	0	0	0	0	0	0	72	0	0	0	0	72	0	0	0	0	0	0	0	0	0	0	0	0	0	0	0	0	0	0	0
ef1b4a0089370085fdfb633038f3997d	0	0	11	0	0	0	0	0	0	11	18	0	15	0	0	0	19	0	0	52	0	0	0	0	0	0	0	0	0	0	0	0	0	0	0	0	0	0	0	0	22	0	0	0	0	6	0	0	0
ec7d6905b22adeea47a2ebf5881ccbc2	0	0	0	0	0	0	0	0	0	0	0	0	0	0	40	28	0	0	0	68	0	0	0	0	0	0	0	0	0	0	0	0	0	0	0	0	0	0	0	0	0	0	0	0	53	0	0	0	0
2e865e4c46b22e6e65a6f51d41d0dab5	10	0	0	0	0	0	0	0	0	10	0	0	0	0	0	0	0	0	0	0	0	0	0	0	0	0	0	0	0	0	0	0	0	0	0	0	0	0	0	0	0	0	0	0	0	0	0	0	0
6c8b5ed1545840d37193762301d21979	0	0	0	0	0	0	0	0	0	0	0	0	0	14	0	0	0	0	0	14	0	0	0	0	33	0	0	0	0	33	0	0	0	0	0	0	0	0	0	0	0	0	0	0	0	0	0	0	0
0155559bc2cbc36fb9ae02f726fe5e9d	0	0	0	0	0	0	0	0	0	0	0	0	0	0	0	0	0	0	0	0	0	0	0	0	0	0	0	0	0	0	0	10	0	0	30	0	0	0	14	54	0	0	0	0	0	45	0	0	24
7dd03e36d04952205fcd4858d2a830ba	0	0	6	0	0	0	0	0	0	6	0	0	0	0	0	0	0	0	0	0	0	0	0	0	0	16	0	0	0	16	15	0	11	0	0	0	0	0	0	26	8	0	16	0	0	0	0	0	0
914cf3ef9a65fb92321ece07713c4177	0	0	0	0	0	0	0	0	0	0	0	0	0	19	0	0	0	0	0	19	0	0	0	0	0	0	0	0	0	0	0	0	0	0	0	0	0	0	0	0	0	0	0	0	0	0	0	0	0
bd718849c1989babf1d9c98a538f5db7	0	0	0	0	0	0	0	0	0	0	0	0	0	0	0	0	0	0	0	0	0	0	0	0	0	0	0	0	0	0	0	0	0	0	0	0	0	0	0	0	0	0	0	0	0	0	0	0	4
9f911ae883b13dbac236861505b887aa	0	0	0	0	0	0	4	0	0	4	0	0	16	18	0	0	0	0	0	34	0	0	0	0	0	0	0	0	0	0	0	0	0	0	0	0	0	0	0	0	0	0	0	0	13	0	0	0	0
9f95d4577352620253bf5fb015f9278d	0	0	0	0	0	0	0	0	0	0	0	0	0	0	0	0	15	0	0	15	0	0	0	0	0	0	0	0	0	0	23	0	0	0	6	0	0	10	0	39	0	0	0	0	0	0	0	0	9
ffee4dba59207fe47e3fe4a074b44f0e	0	0	0	0	17	0	0	17	28	62	0	0	0	0	0	0	0	0	0	0	0	0	0	5	0	0	0	0	0	5	0	0	0	0	0	0	0	0	0	0	0	0	0	0	0	0	0	0	0
65019319889e754df87d8c98ef65c557	0	0	0	0	0	0	0	0	0	0	0	0	0	0	0	0	0	0	0	0	0	0	0	0	0	0	0	0	0	0	0	0	0	0	0	0	0	0	0	0	0	0	0	0	0	0	0	0	0
27986f28f95c1bad6a175621838365f6	69	54	0	0	0	0	0	0	0	123	0	0	0	0	0	0	0	0	0	0	0	0	0	0	0	0	0	0	0	0	0	0	0	0	0	0	0	0	0	0	0	31	81	0	0	0	43	0	0
f10e1777957f83920e160f9daf4bf51b	0	0	0	0	0	0	0	0	0	0	9	0	0	0	0	0	0	0	0	9	0	0	0	27	0	0	0	0	0	27	26	0	0	0	0	0	0	0	0	26	0	0	0	0	0	0	0	0	0
6c588c792e459a73dc38121443b669d8	0	0	0	0	0	0	44	0	9	53	0	0	0	14	0	12	0	0	0	26	0	0	0	0	0	0	0	0	0	0	0	0	0	0	0	0	0	0	31	31	0	4	0	22	0	19	0	0	0
9b7a53b8195af49a3df4f8de529feeb2	0	0	0	0	30	0	0	0	0	30	0	0	0	0	0	0	0	0	0	0	0	0	0	0	0	0	0	0	0	0	0	0	0	0	0	0	0	0	0	0	0	0	0	0	0	0	0	0	0
aeebca9ec1bf76241e54957f8995bb9e	0	0	0	0	0	0	0	0	0	0	0	0	0	0	0	0	0	0	0	0	0	0	0	0	0	0	0	0	0	0	0	0	0	0	0	0	0	0	0	0	0	0	0	0	0	0	0	0	0
4904f52a55f671ccf027b6141932e43d	0	0	0	0	0	0	0	0	0	0	0	0	0	0	0	0	0	0	0	0	0	0	0	0	0	0	0	0	0	0	0	0	0	0	0	0	0	0	0	0	0	0	0	0	0	0	0	0	0
816aac2412a72e052e30a24b13ee933c	0	0	0	0	0	0	0	0	0	0	0	0	0	0	0	0	0	0	0	0	0	0	0	0	0	0	0	0	0	0	0	0	0	0	0	0	0	0	0	0	0	0	0	0	0	0	0	0	0
a7853f4ed56ebcc11d31e6f75c0f7ba0	4	0	8	0	0	0	0	0	0	12	0	0	8	10	0	9	8	0	0	35	6	0	9	0	0	0	0	0	0	15	0	7	18	2	0	0	0	0	0	27	0	0	10	0	0	0	0	0	0
cadebcb5f083335cffaf8b5c5b0de270	0	0	0	0	21	0	78	0	0	99	0	0	0	0	0	0	0	0	0	0	0	0	0	0	0	0	0	0	0	0	0	0	0	0	0	0	0	0	33	33	0	0	0	0	0	0	0	0	0
8498d5ef203568a55e4d6ec94cd48487	0	0	0	0	18	0	18	0	0	36	0	0	0	0	0	0	0	19	0	19	0	0	0	0	0	0	0	0	0	0	0	0	0	0	0	0	0	0	0	0	0	0	0	0	0	0	0	0	0
4c664b5b6302018163dcb0e816559727	0	0	0	0	0	0	0	0	0	0	0	0	0	0	0	0	0	0	0	0	0	0	0	0	0	0	0	0	0	0	0	0	0	0	0	0	0	0	0	0	0	0	80	0	0	0	0	0	0
dd003ea31d7d9b1f57c0270042363d6b	0	0	0	0	5	0	0	0	0	5	0	0	0	0	0	0	0	7	0	7	0	0	0	0	0	0	0	0	0	0	0	26	0	0	0	0	0	0	0	26	0	9	0	0	0	0	0	0	0
cd911499ddfc4cfd5442a17d1168aacc	0	0	0	0	0	0	0	0	0	0	0	0	0	0	0	0	0	0	0	0	0	0	0	0	0	0	0	0	0	0	0	0	0	0	0	0	0	0	0	0	0	0	0	0	0	0	0	0	0
92fcc7daf092b92d60692dc6f1f65834	0	0	0	0	36	0	0	0	0	36	0	0	0	0	0	0	0	0	0	0	0	0	0	0	0	0	0	0	0	0	0	0	0	0	0	0	0	0	0	0	0	0	0	0	0	0	0	0	0
dea9fe5c78360e46aebf79ec241b7f24	0	0	0	0	0	0	0	0	0	0	0	0	0	0	0	0	0	0	0	0	0	0	0	0	0	0	0	0	0	0	0	0	0	0	0	0	0	0	0	0	0	0	0	0	0	0	0	0	0
0548447e0595be3ea658cef67b16d83f	0	0	0	0	0	0	0	0	0	0	0	0	0	0	0	0	0	0	0	0	0	0	0	0	0	0	0	0	0	0	0	0	0	0	0	0	0	0	0	0	0	0	0	0	0	0	0	0	12
7654f3b4d49d890847c34613a9e1fb16	0	0	0	0	0	0	0	0	0	0	0	0	0	0	0	0	0	0	0	0	0	0	0	0	0	0	0	0	0	0	0	0	0	0	0	0	0	0	0	0	0	0	0	0	0	0	0	0	0
abf16ecdff8e503a786441d220c63802	0	58	0	0	0	0	0	0	0	58	0	0	0	0	0	0	0	0	0	0	0	21	0	0	0	0	0	0	0	21	0	80	0	23	0	0	0	0	0	103	0	0	0	0	0	0	0	0	0
60b917669e72b5dc1f5db764606162e6	0	0	0	0	0	0	0	0	0	0	0	30	0	0	21	18	0	0	37	106	0	0	0	0	0	0	0	0	0	0	0	0	0	16	0	0	0	0	0	16	0	0	0	0	0	0	0	0	0
28654e219227848e9d61ea1892886868	0	0	0	0	6	0	0	6	0	12	0	0	0	0	0	0	13	0	0	13	0	0	0	0	21	0	0	0	10	31	0	13	0	0	28	0	7	0	0	48	0	0	0	0	0	41	0	0	0
44f5fcdcd040c2a0483ae7670d4f7946	0	16	0	0	15	0	0	0	0	31	0	0	0	0	0	0	2	9	0	11	0	0	0	0	0	0	0	0	0	0	0	0	0	10	0	0	0	0	0	10	0	0	0	3	0	0	0	0	0
71d7b85b81680aebca50e04b1f614026	0	0	0	0	0	68	0	0	30	98	0	0	0	0	0	0	0	0	0	0	0	0	0	0	0	0	0	0	0	0	0	0	0	0	0	0	0	0	0	0	0	0	0	0	0	0	0	0	0
35735bfa805fb50a0efc9f75b3a6b736	0	0	0	0	0	0	0	0	0	0	0	0	14	0	0	50	16	39	46	165	0	0	0	0	0	0	0	0	0	0	28	0	0	8	0	21	0	0	0	57	0	0	0	0	0	0	0	0	0
bb8e6cd763a428c82f3137964e5452c8	0	0	0	0	0	0	0	0	0	0	0	0	0	0	43	15	0	0	0	58	0	0	0	0	0	0	0	0	0	0	0	0	0	0	0	0	0	0	0	0	0	0	0	0	45	0	0	0	0
e473e3a6cdb85c5429d4e37552f721f9	0	33	0	0	0	0	0	0	0	33	0	0	0	0	0	0	0	0	0	0	0	16	0	0	0	0	0	21	0	37	15	0	0	0	2	0	0	0	0	17	0	0	0	0	0	0	0	0	0
3afe4672ba5bd084b058599170ac81eb	0	0	0	0	0	0	0	0	0	0	0	0	0	0	0	0	0	0	0	0	0	0	32	0	0	0	0	0	0	32	0	0	0	0	0	0	0	0	0	0	0	0	0	0	0	0	0	0	0
3e38647962b8d78697835d3887f7d9a6	0	0	0	0	0	0	0	0	0	0	0	0	0	0	0	0	0	0	0	0	0	0	0	0	0	0	0	0	0	0	0	0	0	0	0	0	0	0	0	0	0	0	0	0	0	0	0	0	0
52488609d3f9a399faa03f1c8b3560aa	0	0	0	0	0	0	0	0	0	0	84	0	0	0	0	0	0	0	0	84	0	0	0	0	0	0	0	0	0	0	0	0	0	0	0	0	0	0	0	0	0	0	0	0	0	0	0	0	0
ec4a61cf4cc790615f21728c0eca147f	0	0	0	0	0	0	0	0	0	0	0	0	33	0	0	35	0	0	3	71	0	0	0	0	0	0	0	0	0	0	0	0	0	29	0	0	0	0	0	29	0	0	0	0	0	0	0	0	0
fc90203271e06afca4255012aa687490	0	0	0	0	0	0	0	2	0	2	5	0	0	0	0	0	0	0	0	5	10	0	3	0	0	0	0	0	0	13	0	24	20	0	0	0	0	0	0	44	0	14	0	0	0	0	0	0	0
f8c73a0f7b0577e07d4c8897a22b8dc7	0	0	0	0	0	0	0	0	0	0	0	0	0	33	0	0	11	0	0	44	6	0	0	0	0	0	0	0	0	6	0	0	0	0	0	0	0	0	0	0	20	0	0	0	0	0	0	0	0
0f26d558c9e4deeb960505ed6d460f2c	0	0	0	0	0	0	0	0	0	0	0	70	18	0	0	0	0	0	0	88	0	0	0	0	0	0	0	0	0	0	30	0	37	0	0	0	0	0	0	67	0	5	0	0	0	0	0	0	0
9f6af0b15aea781e07876b31d1e74bdd	0	0	0	0	0	0	0	0	0	0	0	0	0	0	0	0	0	0	0	0	0	0	0	0	0	0	0	0	0	0	0	0	0	0	0	0	0	0	0	0	0	0	0	0	0	0	0	0	0
0670c45853ce7c499cebd8720f0a4642	0	0	0	0	0	0	0	0	0	0	0	0	0	0	0	0	0	0	0	0	0	0	0	0	0	0	0	0	0	0	0	0	0	0	0	0	0	0	0	0	0	0	0	0	0	0	0	0	0
83afc078a778bc0bc232796dd7ebdf40	0	0	0	0	105	0	0	0	73	178	0	0	0	0	0	0	0	0	0	0	0	0	0	0	0	0	0	0	0	0	0	0	0	0	0	0	0	0	0	0	0	0	0	0	0	0	0	0	0
471864a6d429d38873d581622e76f00e	0	0	0	0	0	0	0	0	0	0	0	0	0	0	0	0	11	0	0	11	0	0	0	0	0	0	0	0	0	0	0	0	0	0	0	0	0	0	0	0	0	0	0	0	0	4	0	0	0
f4d956e2f505c210a854be6046bd2647	0	0	0	0	33	0	29	0	0	62	0	0	0	0	0	0	0	0	0	0	0	0	28	0	0	0	0	0	0	28	0	0	0	0	0	0	0	0	0	0	0	0	0	0	49	0	0	0	0
ab72f5aba4e60f0d9c7c165d57a46ee5	0	0	0	0	0	0	0	0	0	0	0	0	0	0	0	0	0	0	0	0	0	0	0	0	0	0	0	0	0	0	0	0	0	0	0	0	0	0	0	0	0	0	0	0	0	0	0	0	0
8aa1b8418fe991953b80b64d4c7bbef0	0	0	0	0	0	0	0	0	0	0	0	0	0	0	0	0	0	0	0	0	0	0	0	0	0	0	0	0	0	0	0	0	11	0	0	0	0	0	0	11	0	0	0	0	0	0	0	0	0
e67846dc3c6082ac31e90f230c40ea64	0	0	0	0	0	0	0	0	0	0	0	0	8	0	0	0	0	0	0	8	0	0	0	0	0	0	0	0	0	0	0	0	0	13	0	0	0	0	0	13	0	0	0	0	27	0	0	0	0
e31969f0d95d5518e8b27c1a06a3766a	0	48	0	0	24	0	0	0	49	121	0	0	0	0	0	0	0	0	0	0	0	0	0	0	0	0	0	10	0	10	0	0	0	0	0	0	0	0	0	0	0	0	0	0	0	0	0	0	0
384997af792c9a4fd56346546dd09080	0	0	0	0	0	0	0	0	0	0	0	0	0	0	0	24	0	0	0	24	0	0	0	0	0	0	12	0	0	12	0	0	0	0	0	0	0	0	0	0	0	0	0	0	0	0	0	0	0
a114dec580226214804cd029fb8fe880	0	0	0	0	39	0	22	0	0	61	0	0	0	0	0	0	0	0	0	0	0	0	0	0	0	0	5	0	8	13	0	0	0	0	0	0	0	12	0	12	0	0	0	0	0	0	0	0	0
2fd7444af9a888b904ba8aa72bbc9db2	8	0	6	0	0	0	0	0	0	14	0	0	10	4	0	4	3	0	0	21	6	0	8	0	0	0	0	0	0	14	0	5	6	6	0	0	0	0	0	17	0	0	7	0	0	0	0	0	0
d53ff25d6eb3ed218b6f2073915f6baf	14	0	0	0	0	0	0	0	0	14	9	0	0	0	0	13	0	0	0	22	0	0	0	0	0	0	0	0	0	0	15	0	0	20	0	0	0	0	0	35	0	0	10	0	0	0	13	0	0
6885512a96666075b2a1fa21d37fcafe	0	0	0	0	0	0	0	0	0	0	0	0	0	0	0	42	0	0	0	42	0	0	0	0	0	0	20	0	0	20	0	0	0	0	0	0	0	0	0	0	0	0	0	0	0	0	0	0	0
fa6b12e74e1ff144782c79172f50a530	0	0	0	0	0	0	0	0	0	0	30	0	0	35	0	0	0	0	0	65	0	0	0	0	0	0	0	0	0	0	0	0	0	0	0	0	0	0	0	0	0	0	0	0	0	0	0	0	0
13dab6f522e7c71f7b57d115772c5ad9	0	0	0	0	0	0	0	0	0	0	0	0	0	0	0	0	0	0	0	0	0	0	0	0	0	0	0	0	0	0	0	0	0	0	0	0	0	0	0	0	0	0	0	0	0	0	0	0	0
c84d5b7ebd8977e241c2aa6b195c1fd0	0	0	0	0	0	0	0	0	0	0	0	0	0	0	0	0	0	0	0	0	0	0	0	0	0	0	0	0	0	0	0	0	0	0	0	0	0	0	0	0	0	0	0	0	0	0	0	0	0
db94dbb8659215e831eb98e2afdf2ccd	0	10	0	0	0	0	0	0	17	27	0	0	0	0	0	0	0	0	0	0	0	0	0	0	0	0	0	0	0	0	0	0	0	0	0	0	0	0	0	0	0	0	0	0	0	0	0	0	0
54c46d92d777985e2bb8170b317870d9	0	0	0	0	0	0	0	0	60	60	0	0	0	0	0	0	0	83	0	83	0	0	0	0	114	0	0	0	0	114	0	0	0	0	0	0	0	0	0	0	0	0	0	0	0	0	0	0	0
ce2b913942473870cf696e1bde906f6a	0	0	0	31	35	27	29	4	0	126	0	0	0	0	0	0	0	25	0	25	0	0	0	0	0	7	0	0	0	7	0	0	0	0	0	0	0	0	0	0	0	0	0	0	0	7	0	0	0
b87faa5a443dbeb4a3492b51b4ccb621	0	11	0	0	31	0	0	21	29	92	0	0	0	0	0	0	0	49	0	49	0	0	0	0	0	0	0	0	28	28	0	0	0	0	0	0	0	0	0	0	0	0	0	0	0	0	0	0	0
2e6cf18ec96455e3813108400aaea3a8	0	0	0	0	0	0	0	0	0	0	0	0	0	0	0	0	0	0	0	0	0	0	0	0	0	0	0	0	0	0	0	0	0	0	0	0	0	0	0	0	0	0	0	0	0	0	0	0	0
6aab38bda69b338f1ea14872af592313	0	0	0	0	0	0	0	0	0	0	0	0	0	0	0	0	0	0	0	0	0	0	0	0	0	0	0	0	0	0	0	0	0	0	0	0	0	0	0	0	0	0	0	0	0	0	0	0	0
bea637b0ddf3d35a5a159dea5717173b	0	0	0	0	0	0	0	0	0	0	0	0	0	0	0	0	0	0	0	0	0	0	0	0	0	0	0	0	0	0	0	0	0	0	0	0	0	0	0	0	0	0	0	0	0	0	0	0	0
7eee40e6ac01780376e913d3e1557694	15	0	0	0	0	0	0	0	0	15	0	0	0	0	0	0	0	0	0	0	0	0	0	0	0	0	0	0	0	0	0	0	0	0	0	0	0	0	0	0	0	0	0	0	0	0	0	0	0
e871be681cb26c7eb2a6bf8adfd0cb89	0	0	0	0	0	0	0	0	0	0	0	0	0	0	0	0	0	0	0	0	0	0	0	0	0	0	0	7	0	7	0	0	11	0	0	0	0	0	0	11	0	0	0	0	0	0	0	0	0
191261f60d2530cd3b679cbe9abdfe0b	0	24	4	0	0	0	0	0	46	74	0	0	0	0	0	0	0	2	0	2	0	0	8	0	0	18	0	0	0	26	0	0	22	0	0	10	16	0	0	48	0	0	0	0	0	0	0	0	18
4bf4ac1d2c7c925d530b86b0e1f5a4bb	0	0	0	0	0	0	0	0	0	0	0	0	0	0	0	0	0	0	0	0	0	0	0	0	0	0	0	0	0	0	0	0	0	0	0	0	34	0	0	34	0	0	0	0	0	0	0	0	0
79ead2945dcad292d55252a9d3333a83	0	0	0	0	0	22	0	0	0	22	0	0	0	21	0	0	0	0	0	21	0	0	0	0	0	0	0	0	0	0	0	0	0	0	0	0	0	0	0	0	0	0	0	0	0	0	0	0	0
237067e1828e7787d5caa5cb15c37000	0	0	0	0	25	24	0	0	0	49	0	27	27	0	0	16	16	15	0	101	0	0	0	0	0	0	0	0	0	0	0	0	0	0	0	0	0	0	0	0	0	0	0	0	0	0	0	0	0
6530b6e58d47d50a1b39a4d8679cb9c3	0	0	0	23	0	24	0	0	27	74	0	0	0	0	0	0	0	0	0	0	0	0	0	0	0	0	0	0	0	0	0	0	0	0	10	0	0	0	0	10	0	0	0	0	0	0	0	0	0
c9bdc4d88db1553b6e1f76242d3149f8	0	0	0	0	0	0	0	0	0	0	0	0	0	0	0	0	0	0	0	0	0	0	0	0	0	0	0	0	0	0	0	0	0	0	0	0	0	0	0	0	0	0	0	0	0	0	0	0	0
88af51150f7cf665dc39d9e9d304ba8e	0	0	0	0	0	0	0	0	30	30	0	0	0	0	0	0	0	0	0	0	0	0	0	0	0	0	0	0	0	0	0	0	0	11	0	0	0	0	0	11	0	0	0	0	0	0	0	0	0
dad3364dffe9bb341502e751ecf773b7	51	0	0	0	0	0	0	0	0	51	0	0	0	0	0	0	0	0	0	0	0	59	0	0	0	0	0	0	0	59	0	0	0	0	0	0	0	0	0	0	0	0	0	0	0	0	55	0	0
121a8aaefe6b2f013eb86ca979c4ff4c	0	0	7	0	0	0	0	0	0	7	19	0	0	0	0	17	0	0	0	36	0	0	0	0	0	0	0	0	0	0	24	21	12	0	0	0	0	0	0	57	13	0	0	0	0	0	0	0	0
ba15556f0fab937c0f01b6602f2ffb80	0	0	0	0	0	0	0	0	0	0	0	0	0	0	0	0	0	0	0	0	0	0	0	0	0	0	0	0	0	0	0	0	0	0	0	0	0	0	0	0	0	0	0	0	0	0	0	0	0
f52e262ae9f1a59561e30204db845101	0	0	8	0	0	0	0	0	0	8	0	0	0	0	0	0	0	0	0	0	0	0	0	0	0	0	0	0	0	0	0	0	16	0	0	0	0	0	0	16	0	0	0	0	0	0	0	0	0
e76d4e144b3180512b8f9242419ffdc6	0	0	0	0	0	0	0	0	0	0	0	0	0	17	0	0	0	0	0	17	0	0	0	12	0	0	0	0	0	12	0	0	0	0	0	0	0	0	0	0	14	0	0	7	0	6	0	0	0
7228aec6c28205ca0b9a39193dde6554	0	0	0	0	0	0	0	0	35	35	0	0	0	0	0	0	0	0	0	0	0	0	0	0	0	0	0	0	0	0	0	0	0	0	0	0	0	0	7	7	6	0	0	0	34	5	0	0	0
9fdfec29134347364c82b21fb0cdefb0	0	20	0	20	0	28	20	0	23	111	0	0	0	0	0	0	0	0	0	0	0	0	0	0	0	8	0	0	0	8	0	0	0	0	0	0	0	0	0	0	0	0	0	0	0	0	0	0	0
7588bbda46d13242d9a2ac512fd1d38f	0	8	0	0	0	0	0	0	0	8	0	0	0	0	5	0	3	0	0	8	0	0	0	0	0	0	0	0	0	0	0	0	0	0	0	0	0	0	8	8	0	0	0	0	0	0	0	0	0
7978532d21ffe78cc702abbcb80e7cd8	0	7	0	0	35	0	0	28	18	88	0	0	0	0	0	0	0	29	0	29	0	0	0	0	0	0	0	0	21	21	0	0	0	0	0	0	0	0	0	0	0	0	0	0	0	0	0	0	0
2c7637e1e2da66561a7e460f4b58f598	0	0	0	0	22	0	0	0	0	22	15	0	0	0	0	0	38	0	0	53	0	22	0	0	0	0	0	0	0	22	0	0	0	0	0	0	0	0	0	0	0	0	0	0	0	0	0	0	0
296f7568d05dbfc794c1455e77c48261	0	0	0	0	0	0	0	0	0	0	0	0	0	0	0	0	0	0	0	0	0	0	0	0	0	0	0	0	0	0	0	0	0	0	0	0	0	0	0	0	0	0	0	0	0	0	0	0	0
9786e4679b50d167bf7853bc87f551e5	0	0	0	0	0	0	0	0	0	0	0	0	0	7	0	0	0	0	0	7	0	0	0	0	0	0	0	0	0	0	0	0	0	0	0	0	0	0	0	0	0	0	0	0	0	0	0	0	0
9b5cfafb82f0a98b5bab0a9513af8718	6	0	0	0	0	0	13	0	0	19	0	0	7	10	0	0	0	0	0	17	0	0	0	5	0	0	0	0	0	5	13	0	0	0	0	0	0	0	0	13	0	0	0	0	0	0	0	0	0
806fe04702731fd68540be1192b2a5d0	0	0	0	0	0	0	0	0	0	0	0	0	0	0	0	0	0	0	0	0	0	0	0	0	0	0	0	0	0	0	0	0	0	0	0	0	0	0	0	0	0	0	0	0	0	0	0	0	0
1b1ca00845299e4b4a653bf8dadc8a8b	0	0	0	0	0	0	0	0	0	0	0	0	0	0	0	0	0	0	0	0	0	0	0	0	0	0	0	0	0	0	0	0	0	0	0	0	0	0	0	0	0	0	0	0	0	0	0	0	0
39cb3466f9954c4d9140bfcfe4a33c01	0	0	0	0	0	0	0	0	0	0	0	0	0	0	0	0	0	0	0	0	0	0	0	0	0	0	0	0	0	0	0	0	0	0	0	0	0	0	3	3	6	0	0	0	0	0	0	0	0
304b09db2a36b940c594913c3a15cd06	0	0	0	0	0	0	0	0	0	0	0	54	0	0	0	0	0	0	0	54	0	0	0	0	0	56	0	0	0	56	0	0	0	0	0	0	0	0	0	0	0	0	0	0	0	0	0	0	0
d10941c7fd187f8915d25fdb67397c69	28	0	0	0	0	0	0	0	75	103	0	0	0	23	0	0	12	0	0	35	0	0	0	0	0	0	0	0	0	0	0	0	9	0	0	0	0	0	0	9	0	0	0	0	0	0	0	0	0
054e6ba1a60edccc2ad205f22b81e2cb	0	0	0	0	0	0	0	0	0	0	0	0	0	0	0	0	0	0	0	0	0	0	10	0	17	0	0	0	0	27	0	0	0	0	0	0	0	0	0	0	0	0	0	0	0	0	0	0	0
853dd39636feb75acca2bf06bd36ba5e	0	0	0	0	0	0	0	0	0	0	0	0	0	0	0	0	0	0	0	0	0	0	0	0	0	0	0	0	0	0	0	0	0	0	0	0	0	0	0	0	0	0	0	0	0	0	0	0	0
fefb5cc70064aba82ab5d7fcb32d3048	0	11	0	0	9	13	12	0	20	65	0	0	0	0	0	0	6	0	0	6	0	0	0	26	0	0	13	0	0	39	0	0	0	0	0	0	0	0	0	0	16	0	0	0	0	0	0	0	0
4b336f1957cb2f3d9438fdbedbb06c6a	0	32	0	0	7	0	0	0	0	39	0	0	0	0	0	0	6	0	0	6	22	0	0	0	0	0	0	0	0	22	0	0	0	42	0	0	0	0	0	42	0	0	0	0	0	0	0	0	0
ab9eefb6f9e0aaec882d8262cfeb75b5	0	0	0	0	0	0	0	0	0	0	0	0	0	0	0	0	0	0	0	0	0	0	0	0	0	0	0	0	0	0	0	0	0	0	0	0	0	0	0	0	0	0	0	0	0	0	0	0	0
5737e69a364f3c811533981398c97133	0	0	0	0	0	0	0	0	0	0	0	0	0	0	0	0	0	0	0	0	0	0	0	0	0	0	0	0	0	0	0	0	0	0	0	0	0	0	0	0	0	0	0	0	0	0	0	0	0
b4b43722935d718ccd878ff8e56a2921	0	0	0	0	0	0	0	0	0	0	0	0	0	0	0	0	0	0	0	0	0	0	0	0	0	0	0	0	0	0	0	0	0	0	0	0	0	0	0	0	0	0	0	0	0	0	0	0	0
c14cda37fec55b5e1ee95e6e0b3567f8	0	0	0	14	0	0	0	0	22	36	0	0	0	0	0	0	0	33	0	33	0	0	0	0	0	34	0	0	0	34	9	0	0	0	0	0	0	0	0	9	0	0	0	0	0	0	9	0	0
2e7322adb34663e71a3a8ae9d2e20874	0	0	0	0	0	0	0	0	0	0	0	0	0	0	0	0	26	0	0	26	0	0	0	0	0	0	0	0	0	0	0	0	0	0	0	0	0	0	0	0	0	0	0	0	0	0	0	0	0
585911b5b7f33d3c2796ea34242cb443	0	0	0	0	0	0	0	0	0	0	0	0	0	0	0	0	0	0	0	0	0	0	0	0	0	0	0	0	0	0	0	0	0	0	0	0	0	0	0	0	0	0	0	0	0	0	0	0	0
d542a77ba4283477b70a8cd976cc3c74	0	0	22	0	0	18	17	0	22	79	0	0	0	0	0	0	6	0	0	6	0	0	0	0	0	10	0	0	0	10	0	0	0	0	0	0	0	0	0	0	0	0	0	0	0	0	0	0	0
308f243a7b27c66d9c333fe661529c8e	0	0	0	0	42	0	0	13	0	55	0	0	0	0	13	9	0	14	0	36	0	0	0	0	0	0	0	0	0	0	0	0	0	0	0	0	0	0	0	0	0	0	0	0	0	0	0	0	0
cb0f33c776d7b3f3a41243f2e06b7c91	0	0	0	0	0	0	0	0	0	0	0	0	0	0	0	0	0	14	13	27	0	0	0	0	0	7	0	0	0	7	0	0	0	0	0	0	0	0	0	0	0	0	0	0	0	0	0	0	0
9016b08c6e017b362df03cb4c63d23f8	0	0	0	0	0	29	0	0	0	29	0	0	0	0	0	0	0	0	0	0	0	0	0	0	0	0	0	0	0	0	0	0	0	0	0	0	0	0	0	0	10	4	0	0	0	9	0	0	0
aecb1f50c3c0bd8d879f1dbfe29345dc	19	0	0	0	15	25	11	11	13	94	9	0	0	16	0	0	0	0	9	34	6	0	0	0	0	0	0	0	0	6	0	0	0	0	0	0	0	0	0	0	15	0	0	0	0	0	0	0	0
d41173a4de7580468a89a61bc89a916e	0	0	0	0	0	28	0	0	0	28	0	0	0	0	0	0	0	0	0	0	0	9	0	0	0	0	0	0	0	9	0	0	0	0	0	0	0	0	0	0	25	0	0	0	0	0	0	0	0
d8e34d32bcd9aca46a8faa1fd941c3cd	6	0	0	0	0	0	0	0	0	6	0	0	0	0	0	0	0	0	0	0	0	0	0	0	0	0	0	0	0	0	0	0	0	0	0	0	0	0	0	0	0	0	0	0	0	0	0	0	0
2c3c118ad9e94e2e6022cba6351628c7	0	0	0	0	8	21	0	0	0	29	0	10	9	0	0	22	0	0	0	41	0	6	0	4	0	16	0	0	0	26	10	0	0	0	0	0	0	0	0	10	0	0	21	0	20	0	0	8	0
47a672427011fbb0eacabb7dac996f92	57	0	0	0	0	0	0	0	0	57	0	0	0	0	0	15	0	13	0	28	0	0	0	0	0	0	0	0	0	0	2	0	0	0	0	0	0	0	0	2	0	0	0	0	0	0	0	0	0
34bab623dbd5bdad5ab4725ff37aa22f	0	0	0	0	0	0	0	0	0	0	0	0	0	0	0	0	0	0	0	0	0	0	0	0	0	0	0	0	0	0	0	0	0	0	0	0	0	0	0	0	0	0	0	0	0	0	0	0	0
671e6e19b0c85d56304cbbac04042efb	0	0	0	0	0	0	0	0	0	0	0	0	0	0	0	0	0	0	0	0	0	0	0	0	0	0	0	0	0	0	0	0	0	0	0	0	0	0	0	0	0	0	0	0	0	0	0	0	0
5ab14cabcac98887a5a7e0f371e1a065	0	0	0	0	0	0	0	0	0	0	0	0	0	0	0	0	0	0	0	0	0	0	0	0	0	0	0	0	0	0	0	0	0	0	0	0	0	0	0	0	0	0	0	0	0	0	0	0	0
f39e1105b807a6e87ba87a12d2c2d7b9	0	27	0	0	29	0	6	0	20	82	7	0	0	0	0	0	0	0	0	7	0	0	0	0	0	0	0	0	0	0	0	0	0	0	0	0	0	0	0	0	79	0	0	0	0	0	0	0	0
95d6c855ff6b0756eca14982aeeb44a6	0	0	0	0	0	0	0	0	0	0	0	0	0	0	0	0	0	0	0	0	0	0	0	0	0	0	0	0	0	0	0	0	50	0	0	53	37	61	19	220	0	0	0	0	0	0	0	0	0
9d8990819a2dbcb78777ab948274fb7e	0	0	0	0	0	0	0	0	0	0	0	0	0	0	0	0	0	0	0	0	0	0	0	0	0	0	0	0	0	0	0	0	0	0	0	0	0	0	0	0	0	0	0	0	0	0	0	0	0
d417210d7da0a677b9bff5d16ee02ca7	0	0	0	0	0	0	0	0	0	0	70	0	0	35	0	0	0	0	0	105	0	0	0	0	0	0	0	0	0	0	0	0	0	0	0	0	0	0	0	0	0	0	0	0	0	0	0	0	0
d0a45699fb1aa24e0ab316f35fd71f77	0	18	0	0	0	0	3	0	0	21	0	0	0	0	6	0	0	0	0	6	0	0	0	0	0	0	0	0	0	0	0	17	0	3	0	0	0	0	0	20	0	0	0	0	0	0	0	0	0
6899fbcf7c4ff804452cf23814161ec8	0	0	0	0	0	0	0	0	0	0	0	0	0	0	0	0	0	0	0	0	0	0	0	0	0	0	0	0	0	0	0	0	0	0	0	0	0	0	0	0	0	0	0	0	0	0	0	0	0
631840e265cdc82de262ef71288e63d9	0	0	0	0	0	0	4	0	0	4	10	0	0	0	0	0	0	0	0	10	0	0	0	13	0	0	0	0	0	13	0	0	0	0	0	0	0	0	8	8	0	0	0	0	0	0	0	0	0
d6e4a4b10d100d7e76b2abb23b73e823	0	0	0	0	0	0	0	0	0	0	0	0	0	0	0	0	0	0	0	0	0	0	0	0	0	0	0	0	0	0	0	0	0	0	0	0	0	0	0	0	0	0	0	0	0	0	0	0	0
5c05fc98dcfdda283cf09d0dfad32db5	0	0	0	0	0	0	0	0	0	0	0	0	0	0	0	0	0	0	0	0	0	0	0	0	0	0	0	0	0	0	0	0	0	0	0	0	0	0	0	0	0	0	0	0	0	0	0	0	0
e75ef20124fa8cca36a3b48852a188f6	0	29	0	0	0	0	72	0	0	101	0	0	0	0	0	0	0	0	0	0	0	0	0	0	0	0	0	0	44	44	0	0	0	25	0	0	43	0	0	68	0	0	0	0	0	0	0	0	0
73ce2971575bcac7c95a2b1d7022513a	0	0	0	0	0	0	0	0	0	0	0	0	0	0	0	0	0	0	0	0	0	0	0	0	0	0	0	0	0	0	0	0	0	0	0	0	0	0	0	0	0	0	0	0	0	0	0	0	0
c050fac9eedc4b081f46b3e4f6cb24ff	0	0	0	0	0	0	0	0	0	0	0	0	0	0	0	0	0	0	0	0	0	0	0	0	0	0	0	0	0	0	0	0	0	0	0	0	0	0	0	0	0	0	0	0	0	0	0	0	0
28d3ec840cdd9dfb5e6b1a2dd90e5148	0	0	0	0	0	0	0	0	0	0	0	0	0	0	0	0	0	0	0	0	0	0	0	0	0	0	0	0	0	0	0	0	0	0	0	0	0	0	0	0	0	0	0	0	0	0	0	0	0
4ac5d2fa035444f9487705c2992ce189	0	0	0	0	0	0	0	0	0	0	0	0	0	0	0	0	0	0	0	0	0	0	0	0	0	0	0	0	0	0	0	0	0	0	0	0	0	0	0	0	0	0	0	0	0	0	0	0	0
eb69cdae9688387d497b02ca3c7d57e3	0	0	0	0	0	0	0	0	0	0	0	0	0	0	0	0	0	0	0	0	0	0	0	0	0	0	0	0	0	0	0	0	0	0	0	0	0	0	109	109	17	0	0	20	0	0	0	0	0
3182e7e73ef01a6be67debcf3cfb7ce0	0	0	0	0	0	0	0	0	0	0	0	0	0	18	0	0	0	0	0	18	0	0	0	0	0	0	0	0	0	0	11	0	0	0	0	0	0	0	0	11	0	0	0	0	0	15	0	0	0
f43afe1d5189f34a042247058f561840	0	0	0	0	0	0	0	0	0	0	0	0	0	0	0	0	0	0	0	0	0	0	0	0	0	0	0	0	0	0	0	0	0	0	0	0	0	0	0	0	0	0	0	0	0	0	0	49	0
14e060e4e3558e421aa78fb383c0bd40	0	0	0	0	0	0	0	0	0	0	0	0	0	0	0	0	0	0	0	0	0	0	0	0	0	0	0	0	0	0	0	0	0	0	0	0	0	0	0	0	0	0	0	0	0	0	0	0	0
2ddfc3e8a5fdf8120a16efeed8cd8c0c	0	0	0	0	0	0	0	0	0	0	0	0	22	5	0	0	0	0	0	27	0	0	16	0	0	0	0	0	0	16	0	0	0	0	0	0	0	0	0	0	0	0	0	0	0	0	0	0	0
cf4a63359720b17f0d69f02a1b061b64	0	0	0	0	0	0	0	0	0	0	0	0	0	0	0	86	0	0	0	86	0	0	0	0	0	0	0	0	0	0	0	0	0	0	0	38	0	0	0	38	0	0	0	0	0	0	0	0	28
d33dbe04c73dd602ad22b64711077362	0	0	0	0	0	0	0	0	0	0	0	0	42	0	0	0	0	0	0	42	0	0	0	0	0	0	0	0	0	0	0	0	0	0	0	0	0	0	0	0	0	0	0	0	0	20	0	96	0
60b48ace5ce2ca148a096e976fd6373d	12	0	0	0	0	0	0	0	0	12	0	0	0	0	0	0	0	0	0	0	0	0	0	0	0	0	0	0	0	0	0	0	0	42	0	0	0	0	0	42	0	0	0	0	0	0	0	0	0
9c78ab80bc898331cd65a5fbb9241507	0	0	0	0	0	0	0	0	0	0	0	0	0	0	0	0	0	0	0	0	0	0	0	0	0	0	0	0	0	0	0	0	0	0	0	0	0	0	0	0	0	0	0	0	0	0	0	0	0
889749465f0d4b4e3629fd53ce497506	0	0	0	0	0	0	0	0	0	0	0	0	6	0	0	0	0	0	7	13	0	0	0	0	0	0	0	0	0	0	16	0	29	41	10	0	22	0	0	118	0	0	0	0	0	0	0	0	0
ac00fe9632318bef30b00ae3a34b412f	0	0	0	0	0	0	0	0	0	0	0	0	0	0	0	0	0	0	0	0	0	0	0	0	0	0	0	0	0	0	0	0	0	0	0	0	0	0	0	0	0	0	0	0	0	0	0	0	0
999228e72a916f22437fec3dae476b4b	0	0	0	0	0	0	0	0	0	0	0	0	0	0	0	0	0	0	0	0	0	0	0	0	0	0	31	0	0	31	0	0	0	0	0	0	0	0	0	0	0	16	0	0	0	0	0	0	0
77e915ed495a35619f9c2d9de00efefd	25	0	0	0	0	0	0	0	0	25	0	0	0	0	0	0	0	0	0	0	0	0	0	0	0	0	0	0	0	0	0	0	0	0	0	0	0	0	0	0	0	0	0	0	0	0	0	0	0
9a0b11e84953e67c7acfa14839fdb386	22	0	0	28	21	24	0	11	0	106	0	20	0	0	0	0	0	0	0	20	21	0	0	12	0	0	0	0	0	33	10	0	0	24	0	0	0	0	0	34	0	0	0	0	0	0	0	0	0
1e2919eb184770bceb1fb6ab7d6c0b9e	0	0	0	0	0	0	0	0	0	0	0	0	15	13	9	0	0	0	0	37	0	0	0	0	0	0	0	0	0	0	0	0	0	0	0	8	0	0	0	8	0	0	0	0	0	0	0	0	0
470a61469a5913d819d199f2f6e1007c	0	0	0	0	0	0	0	0	0	0	0	0	0	0	0	0	0	0	0	0	0	0	0	0	0	0	0	0	0	0	0	0	0	0	0	0	0	0	0	0	0	0	0	0	0	0	0	0	0
90ed6bb025550437e2634812df6b1857	0	0	0	0	0	0	0	0	0	0	0	0	0	0	0	0	0	0	0	0	0	0	0	0	0	0	20	0	0	20	0	0	0	0	0	0	0	0	0	0	0	0	0	0	0	0	0	0	0
455235060d52a7637844e8ef77285238	0	0	0	0	0	0	0	0	0	0	0	0	0	0	0	0	0	0	0	0	0	0	0	0	0	0	0	0	0	0	0	0	0	0	0	0	0	0	0	0	0	0	0	0	0	0	0	0	0
69ac18477d30ecd10f5ba5a54e46489e	0	17	0	0	0	0	0	0	0	17	0	0	0	0	0	0	0	0	0	0	0	0	0	0	0	0	0	0	0	0	0	0	0	0	0	0	0	0	0	0	0	0	0	0	0	0	0	0	0
141bf3e1826e25d3f85df4f4d3c1e780	0	0	0	0	0	0	0	32	0	32	0	0	0	0	0	0	0	0	0	0	0	0	0	8	0	0	0	0	0	8	0	0	0	0	0	0	0	0	0	0	0	0	0	0	0	0	0	0	0
953b5e2f58a46933e632327891716682	0	0	0	0	0	0	0	0	0	0	0	0	0	0	0	0	0	0	0	0	0	0	0	0	0	0	0	0	0	0	4	0	0	0	0	0	16	0	0	20	0	0	0	0	0	0	0	0	16
96d84edc8dcaa74a3ad27dc806c45a05	0	0	0	0	0	0	0	0	0	0	0	0	0	0	0	0	0	0	0	0	0	0	0	0	0	0	0	0	0	0	0	0	0	0	0	0	0	0	0	0	0	0	0	0	0	0	0	0	0
2397d72affa07c60ec19e8aa288514f7	0	0	0	0	0	0	0	0	0	0	0	0	0	0	0	11	0	0	0	11	0	0	0	0	0	0	0	0	0	0	0	0	0	0	0	0	0	0	106	106	23	0	0	20	0	0	0	0	0
1e3daadfc9448682be521eeb3a80f61b	0	0	0	0	0	0	14	0	0	14	0	0	10	8	0	0	0	0	0	18	0	0	0	0	0	0	0	0	0	0	0	0	0	0	0	0	0	0	0	0	0	5	0	0	30	0	0	0	0
3f7f3ccb60b03a51ffe229ce4e3ff8db	0	12	0	0	0	0	0	0	0	12	0	0	0	8	0	0	0	0	0	8	0	0	0	0	0	0	0	0	0	0	0	0	0	0	0	0	0	0	0	0	0	0	0	0	0	0	0	0	0
027660c97d107c2613475bf3c374635f	13	0	0	0	0	0	7	0	0	20	0	0	0	0	0	0	21	0	0	21	0	0	0	0	30	0	0	0	0	30	0	0	0	0	0	0	0	0	9	9	0	0	0	0	0	0	0	0	0
3bc2902ac63e81aeae95d893994faec4	0	0	0	0	28	0	0	0	0	28	0	0	0	0	0	0	0	0	0	0	0	0	0	0	0	0	0	0	0	0	0	0	0	0	0	0	0	0	0	0	0	0	0	0	0	0	0	0	0
cf2d671123ec87d2907ba2a5d4c3cdb3	0	0	0	0	0	0	0	0	0	0	0	23	0	0	0	0	0	0	0	23	0	0	0	0	0	0	0	0	0	0	0	0	0	0	0	0	0	0	0	0	0	0	0	0	0	0	0	0	0
293d640e4803c12a7f477813ac65d881	0	0	0	0	0	0	0	0	0	0	11	0	0	0	0	0	0	0	0	11	0	0	23	0	0	0	0	0	0	23	0	0	0	0	0	0	0	0	0	0	0	0	0	0	0	0	0	0	0
eba08b4c5d2dfbd7d819fcb9a03aabae	0	0	0	0	0	0	0	0	0	0	0	0	0	0	0	0	0	0	0	0	0	0	0	0	0	0	0	0	0	0	0	0	0	0	0	0	0	0	0	0	0	0	0	0	0	0	0	0	0
cf2418b436406d98147b59ca8baf58a7	0	0	0	0	13	15	0	0	0	28	0	0	3	0	0	6	0	0	0	9	0	0	0	1	0	0	0	0	0	1	0	0	0	0	0	0	0	0	0	0	0	0	0	0	0	0	0	0	0
3e2fe34abfd6f5f144467e227bc14e5b	0	0	0	0	0	0	21	0	0	21	0	0	0	0	0	0	0	0	0	0	0	0	0	0	0	0	0	0	0	0	0	18	0	0	0	0	0	0	0	18	49	0	0	16	0	0	0	0	0
49d157059d14113cc662966924ee2c0f	0	28	0	0	38	0	0	0	37	103	0	0	0	0	0	0	0	0	0	0	0	0	0	0	0	0	0	17	0	17	0	0	0	0	0	0	0	0	0	0	0	0	0	0	0	0	0	0	0
689af89963ab94970a67a62209d456e0	0	0	0	0	0	0	0	0	0	0	0	0	0	0	0	0	0	0	0	0	0	0	0	0	0	0	42	0	0	42	0	0	0	0	0	0	0	0	0	0	0	0	0	0	0	0	0	0	0
bcfa208a42508c39cdb7c4b965d6f179	0	0	0	0	0	0	0	0	33	33	0	0	0	0	0	0	0	0	0	0	0	0	0	0	0	0	0	0	0	0	0	0	0	0	0	0	0	0	0	0	0	0	0	0	0	0	0	0	0
a106fd4e98f0bc1d0ce489502291312a	0	0	0	0	0	0	16	0	12	28	0	0	0	0	0	0	0	0	0	0	0	0	0	0	0	0	10	0	0	10	0	0	0	0	0	0	0	0	0	0	0	0	0	0	0	0	0	0	0
953f9d2074d6958d9f75206c217fd09a	0	0	0	0	0	0	0	0	0	0	0	0	0	0	0	0	0	0	0	0	0	0	0	0	0	0	0	0	0	0	0	0	0	0	0	0	0	0	0	0	0	0	0	0	0	0	0	0	0
a8043c5302c218098c017ff228a6879c	0	0	0	0	0	66	0	0	18	84	0	0	0	0	0	0	0	0	0	0	0	0	0	0	0	0	0	0	0	0	0	0	0	0	0	0	0	0	17	17	0	0	0	0	0	0	0	0	0
fc1ce602e6cf86ddd5d37f587b5ba79f	0	0	0	0	3	0	0	0	0	3	0	0	0	0	0	2	0	0	0	2	0	0	6	0	0	0	0	0	0	6	12	0	0	0	0	0	0	0	0	12	0	0	0	0	0	0	0	0	0
b3c8bae6cb2d7dd0675a354e5811d3f9	0	0	0	0	0	0	0	0	0	0	0	0	0	0	0	0	0	73	0	73	0	0	0	0	0	0	0	0	76	76	0	0	0	0	0	0	0	0	0	0	0	0	0	0	0	0	0	0	0
568eff915a7ca023b7d2f5cc2f66b0ac	0	0	0	0	0	0	0	0	0	0	30	0	0	0	0	0	0	0	0	30	4	0	13	0	0	0	0	0	0	17	0	0	0	0	0	0	0	0	0	0	29	0	0	0	0	0	0	0	0
e13a305714c783af7043bb88464b8167	0	0	0	0	0	0	0	0	0	0	0	0	0	0	0	0	0	0	0	0	0	0	47	0	0	0	0	0	0	47	0	0	0	0	0	0	26	0	0	26	0	0	0	0	0	0	0	0	0
67747a6b2dffa26a79024159e0aa60b4	0	0	0	0	0	0	0	0	0	0	0	0	0	0	0	0	0	0	0	0	0	0	0	0	0	0	0	0	0	0	0	0	0	0	0	0	0	0	0	0	0	0	0	0	0	0	0	0	0
c4f564b0f2c4ff4741687a51cb4230f4	16	0	0	9	0	0	0	0	0	25	0	0	0	0	0	0	0	0	0	0	0	0	0	0	0	0	0	0	0	0	0	0	0	0	0	0	0	0	0	0	0	0	0	0	0	0	0	0	0
fb97bf3402c4dc907c33d63869207657	0	0	0	0	0	0	0	0	0	0	0	0	0	0	0	0	0	0	0	0	0	0	0	0	0	0	0	0	0	0	0	0	0	0	0	0	0	0	0	0	0	0	0	0	0	0	0	0	0
d43bd060c42a6ab3e7beffcdacae163e	0	4	0	0	0	0	0	0	0	4	0	0	0	0	0	0	0	0	0	0	0	0	0	0	0	0	0	0	0	0	0	0	0	0	0	0	0	0	0	0	0	0	0	0	0	0	0	0	0
fae8d3aed8fb2a7c62f30fc771553131	0	0	0	0	0	0	0	0	0	0	0	0	0	0	0	0	0	0	0	0	0	0	0	0	0	0	0	0	0	0	0	0	0	0	0	0	0	0	0	0	0	0	0	0	0	0	0	0	0
4549d4e856c4dbd13af102e2f917a287	0	0	0	0	0	0	0	0	0	0	0	0	0	0	0	0	0	0	0	0	0	0	0	0	0	0	0	0	0	0	0	0	0	0	0	0	0	0	0	0	0	0	0	0	0	0	0	0	0
cd654b398366c5ef70a4f8c59ad1c546	0	0	0	0	0	0	0	0	0	0	0	0	0	0	0	0	0	0	0	0	0	0	0	0	0	0	0	0	0	0	0	0	0	0	0	0	0	0	0	0	0	0	0	0	0	0	0	0	0
3c2ca5dbca29aec576eef537f455a1c7	0	0	0	0	0	15	0	0	39	54	0	0	0	0	0	8	0	7	0	15	0	0	0	0	0	0	0	0	0	0	0	0	0	0	0	0	0	0	0	0	0	0	0	11	0	0	0	0	0
6c28aa04e142ad0b89836af4ba433fb4	0	0	0	0	0	0	9	0	0	9	5	0	0	0	0	0	0	0	0	5	9	0	0	0	0	0	0	0	0	9	0	0	0	0	0	0	0	0	0	0	9	0	0	0	0	0	0	0	0
0b9d589998884353017ebb422b14edf0	0	0	0	0	0	0	0	0	0	0	0	0	0	0	0	0	0	0	0	0	0	0	0	0	0	0	0	0	0	0	0	0	0	0	0	0	34	0	0	34	0	0	0	0	0	0	24	0	0
c3b38a18bd982a267f0722b7826b6fe4	0	0	0	0	0	0	0	0	0	0	0	0	0	0	0	0	0	0	0	0	0	0	0	0	0	0	0	0	0	0	0	0	0	0	0	0	0	0	0	0	0	0	0	0	0	0	0	0	56
8078fc70c761c2a9b2ac2aae6f4a15c9	0	0	0	0	0	0	0	0	0	0	0	0	0	0	0	0	0	0	0	0	0	0	0	0	0	0	0	0	0	0	0	0	0	0	0	0	0	0	0	0	0	0	0	0	0	0	0	0	0
b783949c53a9e6671c4e4cf5a098632e	0	7	0	0	16	0	0	0	0	23	3	0	0	0	0	0	0	0	0	3	0	0	0	0	0	0	0	0	0	0	0	0	0	0	8	7	0	5	6	26	0	0	0	5	0	0	0	0	0
f43602fbd51e926d221e20baca2819d5	0	0	28	0	0	0	0	0	0	28	0	0	0	0	0	0	0	0	0	0	0	0	25	20	0	0	0	0	0	45	0	0	0	0	0	0	0	0	0	0	0	0	0	0	0	0	0	0	0
50467d2997281e80c8496c110edc712d	24	0	0	0	27	0	0	32	0	83	0	0	0	0	0	0	0	0	0	0	0	30	0	0	0	0	0	0	0	30	0	32	0	0	0	0	0	0	0	32	0	0	0	30	0	0	0	0	0
2a4a1f2a60dfeaacf70d5d08e874bb99	0	0	0	0	0	0	0	0	0	0	32	0	0	0	0	0	0	0	0	32	0	0	0	23	0	0	0	0	0	23	0	0	0	0	0	0	0	0	0	0	0	0	0	0	0	7	8	0	0
4d71ae6d43fa534c71c6ca88517faa02	0	0	0	0	0	0	0	0	0	0	0	0	0	0	0	0	0	0	0	0	0	0	0	0	0	0	0	0	0	0	0	0	0	0	0	0	0	0	0	0	0	0	0	0	0	0	14	0	0
d7b6735ef581d97badeb9e83d55f0f51	0	0	0	0	0	0	0	0	0	0	0	0	37	0	0	0	0	14	0	51	0	0	0	0	0	0	0	0	0	0	27	0	0	0	0	0	0	0	0	27	9	0	0	0	0	0	0	0	0
3eb9169e7c86a4f3e1c2835383677d02	0	0	0	0	21	0	0	4	0	25	0	0	0	5	0	0	0	0	0	5	0	9	6	0	29	0	0	0	0	44	0	0	0	0	0	0	0	4	0	4	0	0	0	0	0	0	0	0	0
a6e20789b399ac36e04370a935508765	0	0	0	0	0	0	0	0	0	0	0	0	9	21	17	0	0	0	0	47	0	0	0	0	0	0	0	0	0	0	0	0	0	0	0	12	0	0	0	12	0	0	0	0	0	0	0	0	0
c780260d3ee5bf08a216581aa8ad6f83	10	0	0	0	0	0	0	0	0	10	0	0	11	29	0	0	0	0	0	40	0	0	0	0	0	11	0	0	0	11	0	0	0	0	0	11	0	0	0	11	0	0	0	0	0	0	0	0	0
d1677be129f0d44ba39e1e2ac2046e47	17	0	0	0	0	0	16	0	0	33	0	0	0	5	0	0	8	0	0	13	0	0	0	0	0	0	0	0	0	0	0	0	0	0	6	0	0	0	0	6	0	0	0	7	0	0	0	0	0
b97396516afe7c7863d59abeeb646e05	0	0	0	0	0	0	0	0	0	0	0	0	0	0	0	0	0	0	0	0	0	0	0	0	0	0	0	0	0	0	0	0	0	0	0	0	0	0	0	0	0	0	0	0	0	0	0	0	0
e196728a78bba864427c6b43b52a5cd4	0	0	0	0	0	0	0	0	0	0	0	0	0	0	0	0	0	0	0	0	0	0	0	0	0	0	0	0	0	0	0	0	0	0	0	0	0	0	0	0	10	0	0	0	0	0	0	0	0
0ba43b3f322f3373e4918954adcfee31	0	29	0	0	0	23	0	0	0	52	0	0	0	0	0	0	0	0	0	0	0	0	0	0	0	0	0	0	0	0	0	0	0	0	0	0	0	0	0	0	0	0	0	11	0	0	0	0	0
6ed4448eceb6ee3e75e8f164e7ad3b25	0	0	0	0	0	0	0	0	0	0	0	0	0	0	0	0	0	0	0	0	0	0	0	0	0	0	0	0	0	0	0	0	0	0	0	6	0	0	0	6	0	0	0	0	0	0	0	0	0
ebc4dc210da7cfd1da86d1bba5f2ff8b	0	0	0	0	0	0	0	0	0	0	0	0	0	0	0	0	0	0	0	0	0	0	0	0	0	0	0	0	0	0	0	0	0	0	0	0	0	0	0	0	0	0	0	0	0	0	0	0	0
07b7b5bce5a194d99af0098a5cee2fde	0	0	0	0	0	0	0	0	0	0	0	0	0	0	0	0	0	0	0	0	7	0	0	0	0	0	0	0	0	7	0	0	0	0	0	0	0	0	0	0	0	0	0	0	0	0	0	0	11
5749621a4dd3e649fa045ad9c53a92bd	0	0	0	0	0	0	0	0	0	0	0	0	0	0	4	0	0	0	0	4	0	0	0	0	0	0	0	0	0	0	0	0	0	0	0	0	0	0	0	0	0	0	0	0	0	0	0	0	0
53f3cfd9b917c2cb80488cb0eddb6808	0	29	0	0	0	0	0	0	0	29	0	0	0	0	0	0	0	20	0	20	0	0	0	0	0	0	0	0	0	0	0	0	0	0	0	0	0	0	0	0	0	0	0	0	0	0	0	0	0
5c39e85500733b25d88d153920e0a170	9	0	0	0	0	0	0	0	0	9	0	0	19	17	0	0	0	0	0	36	0	0	0	0	0	12	0	0	0	12	0	0	0	0	0	8	0	0	0	8	0	0	0	0	0	0	0	0	0
d3fe3955f59edf8d7c5a4326b332d96a	0	6	0	0	0	0	0	0	42	48	0	20	0	0	0	0	0	0	0	20	0	0	0	0	0	0	0	0	0	0	0	0	0	0	0	0	54	0	17	71	0	0	0	0	0	0	0	0	0
2a1c2ecbe025a7d71b238816dcbdf636	0	0	35	0	0	0	0	0	0	35	0	0	0	0	0	0	0	0	0	0	0	0	33	16	0	0	0	0	0	49	0	0	0	0	0	0	0	0	0	0	0	0	0	0	0	0	0	0	0
c5c461281c9890e6062e63fe35903b66	0	0	0	19	22	13	0	0	23	77	0	0	0	0	0	0	0	0	0	0	0	0	0	0	25	0	0	0	0	25	0	0	0	0	0	0	0	0	0	0	0	0	0	0	0	0	0	0	0
71057ef9dbe6da787cbdb4ffac39c547	0	0	0	0	19	0	0	0	0	19	0	0	0	0	0	0	0	0	0	0	0	0	0	0	0	0	0	0	0	0	0	0	0	0	0	0	0	0	0	0	0	0	0	0	0	0	0	0	0
951d496441afacf641108a40053be449	0	21	0	0	0	0	0	0	0	21	0	0	0	0	0	0	0	0	0	0	8	0	0	7	0	0	0	0	0	15	0	0	0	0	0	0	0	0	0	0	67	0	0	0	0	0	20	0	0
6860b3e4804deda477e9ee10a77b4b4a	0	0	0	0	0	0	0	0	0	0	0	0	0	0	0	0	0	0	0	0	0	0	0	0	0	0	21	0	0	21	0	0	0	0	0	0	0	0	0	0	0	19	0	0	0	0	0	0	0
4e1528951be8933a11159235994b386a	0	0	0	0	0	0	0	0	0	0	0	0	0	0	0	0	0	0	0	0	0	0	0	0	0	0	58	0	0	58	0	0	0	0	0	0	0	0	0	0	0	0	0	0	0	0	0	0	0
cd82f2089aa7d8d80c8b42b032998c42	0	0	0	0	0	0	0	0	0	0	0	0	0	0	0	0	0	0	0	0	0	39	0	0	0	0	0	0	0	39	0	0	0	0	0	0	0	0	0	0	0	0	0	0	0	0	0	0	0
e524570f7f2881f4cf9b96b4e9412638	0	0	0	0	0	0	0	0	0	0	0	0	0	0	0	0	0	0	0	0	0	0	0	0	0	0	0	0	0	0	0	0	0	0	0	0	0	0	0	0	0	0	0	0	0	0	0	0	0
988598e856197850f1dc45df763170d2	0	0	0	0	0	0	0	0	0	0	0	0	0	0	0	0	0	0	0	0	0	0	0	0	0	0	0	0	0	0	0	0	0	0	0	0	0	0	0	0	0	0	0	0	0	0	0	0	0
c3be0f67b3e1fcedfeeb4935268a449e	0	0	0	0	0	0	0	0	0	0	0	0	0	0	0	0	0	0	0	0	0	0	0	0	0	0	0	0	0	0	0	0	0	0	0	0	0	0	0	0	0	0	0	0	0	0	0	0	0
f09d17995a1b1afe8f1a1ecc480f4e15	0	0	0	0	0	0	0	0	0	0	0	0	0	0	0	0	0	0	0	0	0	0	0	0	0	0	0	0	0	0	0	0	0	0	0	0	0	0	0	0	0	0	0	0	0	0	0	0	0
903834a7d4a9c479a2b0c6d451a723b1	0	0	0	12	22	10	0	0	17	61	0	0	0	0	0	0	0	0	0	0	0	0	0	0	33	0	0	0	0	33	0	0	0	0	0	0	0	0	0	0	0	0	0	0	0	0	0	0	0
a493b057731f36bc3d39b8263ae7b7b1	0	22	0	0	0	0	0	0	0	22	0	0	0	0	0	0	0	0	0	0	23	0	0	0	0	17	0	0	0	40	0	0	0	0	31	0	0	0	0	31	0	0	0	0	0	0	0	0	0
9ae632f312e1b2374e4acae64e9584bc	0	0	0	0	0	0	0	0	0	0	0	0	0	0	0	0	0	0	0	0	0	0	0	0	0	0	0	0	0	0	0	0	0	0	0	0	0	0	0	0	0	0	0	0	0	0	0	0	0
8884d038e4ec59c8d6994f0287cf5128	0	0	0	0	0	0	0	0	0	0	0	0	0	0	0	0	0	0	0	0	0	0	0	0	0	0	0	0	0	0	0	0	0	0	0	0	0	0	0	0	0	0	0	0	0	0	0	0	0
1590cb7fa8545afdb4f5ac1f3d5e5eb4	0	0	0	0	0	0	0	0	0	0	0	0	0	0	0	0	0	0	0	0	0	0	0	0	0	0	0	0	0	0	0	0	0	0	0	0	0	0	0	0	0	0	0	0	0	0	0	0	0
7809dd25545bfd628a619a96893e0b4c	0	0	0	0	0	0	0	0	0	0	0	0	0	0	0	0	0	0	0	0	0	0	0	0	0	0	0	0	0	0	0	0	0	0	0	0	0	0	0	0	7	0	0	0	0	0	0	0	12
1b1a14aad0b4047dc8d30cbf8416f7d6	11	0	0	0	0	0	0	0	15	26	0	0	0	0	0	0	0	0	0	0	0	0	0	0	0	0	0	0	0	0	0	0	0	0	0	0	0	0	0	0	0	0	0	0	0	0	15	0	0
4cce510ec8a5ccb65b0c5f2f6109626b	0	0	0	0	0	0	0	0	0	0	0	0	0	0	0	0	0	0	0	0	0	0	12	0	0	0	0	0	0	12	0	0	0	0	0	0	0	20	0	20	0	0	0	0	0	0	0	0	0
2e81fef889158e2fe9a4d3be4dd3a355	0	0	0	0	0	0	0	0	0	0	0	0	0	0	0	0	0	0	0	0	0	0	0	0	0	0	0	0	0	0	0	0	0	0	0	0	0	0	0	0	0	0	0	0	0	0	0	0	0
70491b964ed19b597a269bc83762469a	0	0	0	0	0	0	0	0	0	0	0	0	0	0	0	0	0	0	0	0	0	0	0	0	0	0	0	0	0	0	0	0	0	0	0	0	0	0	0	0	0	0	0	0	0	0	0	0	0
7ac44f4b72cfb0a33f1b346cde4b1207	0	0	0	0	0	0	0	0	0	0	0	17	0	0	0	0	0	0	0	17	0	0	0	0	0	0	0	0	0	0	0	0	0	0	0	0	0	0	0	0	0	0	0	0	0	0	0	0	0
f43ae0340f126612da2f9dfebeb535bf	7	0	0	0	0	0	0	0	0	7	0	0	0	0	0	0	0	0	0	0	0	0	0	0	0	0	0	0	0	0	0	0	0	0	0	0	0	0	0	0	0	0	0	0	0	0	0	0	0
fdad95a2623ef33a8750bb33d0638bed	0	0	0	0	0	0	0	0	0	0	0	0	0	0	0	0	0	0	0	0	0	0	0	0	0	0	0	0	0	0	0	0	0	0	0	0	0	0	0	0	0	0	0	0	0	0	0	0	0
b29d98302ca38b718da2e014e1950121	0	0	11	0	0	0	0	0	0	11	0	0	0	19	0	0	38	0	0	57	0	0	0	7	0	0	0	0	14	21	0	0	6	0	0	0	0	0	0	6	0	0	0	0	0	0	0	0	0
2bacb0c3fd580500e38d4692105a9535	0	0	0	0	0	0	0	0	0	0	0	0	0	0	0	0	0	0	0	0	0	0	2	0	0	0	0	0	0	2	0	3	0	0	0	0	4	0	0	7	0	0	0	0	0	0	0	0	0
ce3b66d0fa575ec80cea04b9a03fe1f9	0	0	0	0	0	0	0	0	0	0	0	0	0	20	0	0	0	0	0	20	0	0	0	0	0	0	0	0	0	0	0	0	0	0	0	0	0	0	0	0	0	0	0	0	6	0	0	0	0
2b5fa20aaa021cbd0e0f2b167eb2c6a7	0	0	0	0	0	0	0	0	0	0	0	0	7	0	0	0	0	0	0	7	0	0	0	0	0	0	0	0	0	0	0	0	0	0	0	0	0	0	0	0	0	0	0	0	0	0	0	0	0
492f9f1951788af409dc91af7507549d	0	0	0	39	0	0	15	21	11	86	0	0	0	0	0	0	0	18	18	36	0	0	0	0	0	0	0	0	0	0	0	0	0	0	0	0	0	0	0	0	0	0	0	0	0	0	0	0	0
9f2a50c173e2157a993db805bd0f5b8e	0	0	0	0	0	0	0	0	0	0	0	0	0	0	0	0	0	0	0	0	0	0	12	0	0	0	0	0	0	12	0	0	0	0	0	0	0	0	0	0	0	0	0	0	0	0	0	0	0
dabbb08773fba4b0b7465bb92d380224	0	0	0	0	0	0	0	0	0	0	0	0	0	0	0	0	8	0	0	8	0	0	0	0	0	0	0	0	0	0	0	0	0	0	0	0	13	0	0	13	0	22	0	0	0	17	0	0	0
0a240cbceb630ae46183748dd1b7f5e0	0	0	0	0	0	0	0	0	0	0	0	0	0	0	0	0	0	0	0	0	0	0	0	0	0	0	0	0	0	0	0	0	0	0	0	0	0	0	0	0	0	13	11	0	0	0	0	0	0
ec2e8b6cc695f3809d0818242addfd9d	0	0	0	9	0	0	0	0	0	9	0	0	0	0	0	0	0	0	0	0	0	0	0	0	0	0	8	0	0	8	0	0	0	0	0	0	0	0	5	5	0	0	0	0	0	0	4	0	0
f3721a34d0e968e5142040c1e2126715	0	0	0	0	0	0	0	0	0	0	0	0	0	0	0	0	0	0	0	0	0	0	0	0	0	0	0	0	0	0	0	0	0	0	0	0	0	0	0	0	0	0	0	0	0	0	0	0	0
24208d7af8659cff1c9bead17a245989	0	0	0	0	0	0	0	0	0	0	0	55	22	0	0	0	0	0	0	77	0	0	0	0	0	0	0	0	0	0	34	0	0	0	0	0	0	0	0	34	0	0	0	0	0	0	0	0	0
87617f3eb97e8c3cae07a7710009d4f4	0	56	0	0	28	0	0	0	0	84	0	0	0	0	0	0	0	0	0	0	0	0	0	13	0	0	0	0	0	13	0	0	0	0	0	0	0	0	0	0	0	0	0	0	0	0	0	0	0
30aa726c8eee3c229d0f29a9444062bd	0	0	0	0	0	0	0	0	0	0	0	0	0	0	0	0	0	0	0	0	0	0	0	0	0	0	0	0	0	0	0	0	0	0	0	0	0	0	0	0	0	0	0	0	0	0	0	0	0
528b53da1ac3e858810a4143ddc5c915	6	0	0	0	5	0	3	0	0	14	0	0	0	0	6	0	8	0	10	24	0	0	0	0	0	0	0	0	0	0	0	0	0	0	0	0	0	6	0	6	0	0	0	0	0	0	0	0	0
9a6dc52543070b36be2595a3317db49b	0	0	0	0	0	0	0	0	0	0	0	0	0	0	4	0	6	0	0	10	0	0	0	7	0	14	0	0	0	21	0	0	0	9	0	10	0	5	0	24	0	0	0	0	25	0	0	0	0
4e441c97fd25e15a9e5c67fd7c9dacd0	0	9	0	0	0	0	0	0	0	9	0	30	20	0	0	0	0	0	0	50	0	0	0	0	0	0	0	0	0	0	0	0	0	0	0	0	0	9	0	9	0	0	34	0	0	0	0	0	0
c0d3c05349a4d4bdd418156f16779dea	0	0	0	0	0	0	0	0	0	0	0	0	0	0	0	0	0	0	0	0	0	0	0	0	0	0	0	0	0	0	0	0	0	20	0	0	0	0	0	20	27	0	0	0	0	0	0	0	0
53be6c96b00bd686b5ae129d349fc4c8	0	0	0	0	0	0	0	0	62	62	0	0	0	0	0	0	0	0	0	0	0	0	0	0	98	0	0	0	0	98	0	0	0	0	0	0	0	0	0	0	0	0	0	0	0	0	0	0	0
e1f849afc1e570e0c63808acaf5aadeb	0	0	0	0	0	0	0	0	0	0	0	0	0	0	0	0	0	0	0	0	0	0	0	0	0	0	0	0	0	0	0	0	0	0	0	0	0	0	0	0	0	9	25	0	0	0	0	0	0
bb469c4a8943c4d60efa638b27689eb2	0	0	0	0	0	0	0	0	0	0	13	0	0	0	0	0	0	0	0	13	0	0	0	0	0	0	0	0	0	0	0	0	0	0	0	0	0	0	0	0	0	0	0	0	0	0	0	0	0
cff68bbfc9d4066b9c8bbeb8c356ecc8	0	0	0	0	0	0	0	0	0	0	0	0	0	0	0	0	0	0	0	0	0	0	0	0	0	0	0	0	0	0	0	0	0	0	0	0	0	0	0	0	0	0	0	0	0	0	0	0	0
a001f9d8f498b2d9d50cb01e0cf5c95d	0	0	0	0	0	0	0	0	0	0	0	30	0	0	5	0	0	0	0	35	0	0	0	0	0	0	0	0	0	0	24	0	0	0	0	12	0	0	0	36	0	0	0	0	0	0	0	0	0
317de3f8be239bf1963fd2e6cb878efd	0	0	0	0	0	0	0	0	0	0	0	0	0	0	0	0	0	0	0	0	0	0	0	0	0	0	0	0	0	0	0	0	0	0	0	0	0	0	0	0	0	0	0	0	0	0	0	0	0
205ab5ebac71bbc7c20822ef98e6dd0d	0	0	0	0	0	0	0	0	0	0	0	0	0	0	0	0	0	0	0	0	0	0	0	0	0	0	0	0	0	0	0	0	0	0	0	0	0	0	0	0	0	0	0	0	0	0	0	0	0
7342dd69a6a3725ad30634e5f2a173c8	13	0	0	0	0	0	25	0	0	38	0	0	0	0	0	0	0	0	0	0	0	0	0	0	0	0	0	0	0	0	0	15	0	0	0	0	0	0	0	15	0	0	0	0	0	0	0	0	0
a020bd80b6f333ffc280b7ede5eb0d92	0	0	0	0	0	0	0	0	0	0	0	0	0	0	0	0	0	0	0	0	0	0	0	0	52	0	0	0	0	52	12	0	0	0	0	0	0	0	0	12	0	0	0	0	0	0	0	0	0
a82a43771457bae4d1dcd988d9620652	0	0	0	0	0	0	0	0	0	0	0	0	0	0	0	0	0	0	0	0	0	0	0	0	0	0	0	0	0	0	0	0	0	0	0	0	0	0	0	0	0	0	0	0	0	0	0	0	0
6aab65a62fb768e00a99b5b550b33350	0	0	0	0	0	0	0	0	0	0	0	0	0	0	0	0	0	0	0	0	0	0	0	0	0	0	0	0	7	7	0	0	0	0	0	0	0	0	0	0	6	0	19	0	0	0	0	15	0
2a1ac3761b4f2ae3fa707614bb9016af	0	0	0	0	0	0	0	0	0	0	0	0	0	0	0	0	0	0	0	0	0	0	0	0	0	0	0	0	0	0	0	0	0	0	0	0	0	0	0	0	0	0	0	0	0	0	0	0	0
a72808cdfdd6b5e9758330cf1d835339	0	0	0	0	0	0	0	0	0	0	0	0	0	0	0	0	0	0	0	0	0	0	0	0	0	0	0	0	0	0	0	0	0	0	0	0	0	0	0	0	0	0	0	0	0	0	0	0	0
c42c378e13faf2ddd14fafdcb7b71024	0	18	0	0	0	0	0	0	0	18	0	0	0	0	0	0	0	0	0	0	0	0	0	0	0	0	0	0	0	0	0	22	0	0	0	0	0	0	0	22	0	0	0	0	0	0	0	0	0
0fba1cf63b1b859db9c393eb3872922d	0	0	0	0	0	0	0	0	33	33	0	0	0	0	0	0	0	0	0	0	0	5	0	0	0	0	0	0	0	5	0	0	10	21	0	0	0	0	7	38	0	0	0	0	0	0	0	0	0
8e9400c1cecb11d2d024eb691cc994af	12	0	0	0	0	0	0	0	0	12	0	0	0	0	0	0	0	0	0	0	0	0	0	0	0	0	0	0	0	0	15	0	0	0	0	0	0	0	0	15	0	0	0	0	0	0	0	0	0
ee4b4e8a7587f65860cd97ad897cab68	0	0	0	23	0	0	13	18	17	71	0	0	0	0	0	0	0	13	21	34	0	0	0	0	0	0	0	0	0	0	0	0	0	0	0	0	0	0	0	0	0	0	0	0	0	0	0	0	0
a00741aaac8bfa1543defad87ed03961	21	0	0	0	0	0	0	0	0	21	0	0	0	0	0	0	0	0	0	0	0	0	30	0	0	0	0	0	0	30	0	0	0	0	0	0	0	0	0	0	0	0	0	0	0	0	0	0	0
af293a7a9693ac3e002ba916bf6a4899	0	0	0	0	0	0	0	0	0	0	0	0	0	0	0	0	0	0	0	0	0	0	0	0	0	0	0	0	0	0	0	0	0	0	0	0	0	0	0	0	0	0	0	0	0	0	0	0	0
ce8682c3837f5019745f7ce8d140b450	0	0	0	0	0	0	0	0	0	0	0	0	0	0	9	0	0	0	0	9	0	0	0	0	0	0	0	0	0	0	35	0	0	0	0	0	0	0	0	35	0	0	0	0	0	0	0	0	0
62ad5a48146b8a6146936457f494ae08	0	0	0	0	0	0	0	0	0	0	0	0	0	0	0	0	0	0	0	0	0	0	0	0	0	0	0	0	0	0	0	0	0	0	0	0	8	0	0	8	0	0	0	0	0	0	0	0	0
99639a4983a6b1eb7df3272f826c18fd	0	0	0	0	0	0	0	0	0	0	0	0	0	0	0	0	0	0	0	0	0	0	0	0	0	0	0	0	0	0	0	0	0	0	0	0	0	23	0	23	0	0	0	0	0	0	0	0	0
43adfaa5d51b6f9d9df9c6f38f3c61e6	0	0	0	0	0	0	0	0	64	64	0	0	0	0	0	0	0	0	0	0	0	0	0	0	0	0	0	0	0	0	0	0	0	22	0	0	0	0	0	22	0	0	0	0	0	9	0	0	0
abb4caf91a242b8033d76310eaffe50e	22	0	0	0	24	0	21	0	0	67	0	0	0	0	0	0	17	0	0	17	0	0	0	0	0	0	0	0	0	0	0	0	0	0	0	0	0	0	0	0	0	0	0	10	0	0	0	7	0
d9e8895ea65523beb13049c050ed6e34	0	0	0	0	0	0	0	0	0	0	0	0	0	0	0	0	0	0	0	0	0	0	0	0	0	0	0	0	0	0	0	0	0	0	0	0	0	0	0	0	0	0	0	0	0	0	0	5	0
09ee7b9c056d43988b3a4532b30cd5d9	0	0	0	0	0	0	0	0	0	0	9	0	0	0	0	12	0	0	0	21	0	0	0	0	0	0	0	0	0	0	0	0	0	0	0	0	6	0	0	6	0	0	0	0	0	0	0	0	0
9362f1e3ff3ab0de7d39d10b8401f81b	0	0	0	0	0	0	0	0	0	0	0	0	0	0	0	0	12	0	0	12	0	0	0	0	0	0	0	0	0	0	0	0	0	0	0	0	0	6	0	6	0	0	0	0	0	0	0	0	0
be8f65ea7998dcbc4f05e11a3b51de6e	0	0	0	0	0	0	0	0	0	0	10	37	0	0	0	0	0	5	0	52	0	0	0	0	0	0	0	0	0	0	27	0	0	0	0	0	0	0	0	27	0	0	0	0	0	0	0	0	0
19b363b40b57366296c469af0f24c723	0	0	0	0	0	0	0	0	0	0	0	0	0	0	0	0	0	0	0	0	0	0	0	0	0	0	0	0	0	0	0	0	0	0	0	0	0	0	0	0	0	0	0	0	0	0	0	0	0
1126e642a44b99fb05fa9c0c11058e00	0	0	0	0	0	0	0	0	0	0	0	0	0	0	0	0	0	5	0	5	0	0	27	0	0	0	0	0	0	27	0	0	0	0	0	0	0	0	0	0	0	0	0	0	0	0	0	0	0
ba5fb1c919c7bc833df0805afcec4ecc	0	0	0	0	0	0	0	0	0	0	4	0	0	0	0	0	0	0	0	4	0	0	0	0	0	0	0	0	0	0	0	0	0	0	0	0	0	0	0	0	0	0	0	0	0	0	0	0	0
5605934c0ff5c8831d1e932cdb97dd9a	0	0	0	0	0	0	0	0	0	0	0	0	0	0	0	0	0	0	0	0	0	0	0	0	0	0	0	0	0	0	0	0	0	0	0	0	0	0	0	0	0	0	0	0	0	0	0	0	0
314f5ea7a739e5460051363887d7bab3	0	0	0	0	0	0	0	0	0	0	0	0	0	0	0	0	0	0	0	0	0	0	0	0	0	0	0	0	0	0	0	0	0	0	0	0	0	0	0	0	0	0	0	0	0	0	0	0	0
93ac41a658eec8f9a3cf33c8d57472cb	0	0	0	0	0	0	0	0	0	0	0	0	0	0	0	0	0	0	0	0	0	0	0	0	0	0	0	0	0	0	0	0	0	0	0	0	0	0	0	0	0	0	0	0	0	0	0	0	0
ae84834d376e2965f58f50c3f5fdc3e8	0	0	0	0	0	0	0	0	0	0	0	0	0	0	0	0	0	0	0	0	0	0	0	0	0	0	0	0	0	0	0	0	0	0	0	0	0	0	0	0	0	0	0	0	0	0	0	0	0
26a2f8791dda0c19857d0e36cf14962d	0	0	0	0	0	0	0	0	0	0	0	0	0	0	0	0	0	0	0	0	0	6	0	0	0	0	0	0	0	6	0	0	0	0	0	0	0	0	0	0	0	0	0	0	0	0	0	0	0
3f44b23aa3669e0bd259b05a914a023b	0	0	0	0	0	0	0	0	2	2	0	0	19	0	0	0	0	0	0	19	0	0	0	0	0	0	0	0	0	0	0	0	0	0	0	0	0	0	1	1	0	0	0	0	0	0	0	0	0
f2298df8cd7de9c07b48ed20ce9985d6	0	0	0	0	0	0	0	0	0	0	0	0	0	0	0	0	0	0	0	0	0	0	0	0	0	0	0	0	0	0	0	0	0	0	0	0	0	0	0	0	0	0	0	0	0	0	0	0	0
64316fa245c054e4d39dec78030093c9	0	0	0	0	0	0	0	0	0	0	0	0	0	0	0	0	0	0	0	0	0	0	0	0	0	0	0	0	0	0	0	0	0	0	0	0	0	0	0	0	0	0	0	0	0	0	0	0	0
f5e58a09072a2059b5f72e662869030c	0	0	0	0	0	0	0	0	0	0	0	0	0	0	60	0	0	0	0	60	0	0	0	0	0	0	0	0	0	0	0	0	0	0	0	0	0	0	0	0	0	0	0	0	0	0	0	0	0
e97c590bb45c3003640266ad7db0a6d6	0	0	7	0	15	0	0	0	0	22	0	0	4	0	0	0	0	0	0	4	0	0	0	0	0	0	0	0	0	0	0	0	0	0	0	0	0	0	0	0	0	0	0	0	0	0	0	0	0
abc4dcff6c32c57a7450fd8116b0ed6f	0	0	0	0	0	0	0	0	0	0	0	0	0	0	0	0	0	0	0	0	0	0	0	0	0	0	0	0	0	0	0	0	0	0	0	0	0	0	0	0	0	0	0	0	0	0	0	0	0
34ddea5b1bb0fd09fdfe705fee220be5	0	0	0	0	0	0	0	0	0	0	0	0	0	0	0	0	0	0	0	0	0	0	0	0	0	0	0	0	0	0	0	0	0	0	0	0	0	0	0	0	0	0	0	0	0	0	0	0	0
644bb280e5522425457dcd1e59f4bde1	0	0	0	0	0	0	0	0	0	0	0	0	0	0	0	0	0	0	0	0	0	0	0	0	0	0	0	0	0	0	0	0	0	0	0	0	0	0	0	0	0	0	0	0	0	0	0	0	0
b4570d474e814fc35657ce0f32de97c2	0	0	0	0	0	0	0	0	0	0	0	0	0	0	0	0	0	0	0	0	0	0	0	0	0	0	0	0	0	0	0	0	0	0	0	0	0	0	0	0	0	0	0	10	0	0	0	0	0
beb3914c384ae5cd66f44e18d1f2be68	0	0	0	0	0	0	0	0	0	0	0	0	0	0	0	0	0	0	0	0	0	0	0	0	0	0	0	0	0	0	0	0	0	0	0	0	0	0	0	0	0	0	0	0	0	36	0	31	0
3c5021dd838d791b3fe1d14fa1071712	0	19	0	0	0	0	0	0	0	19	0	0	0	0	0	0	0	0	0	0	0	0	0	0	0	0	0	0	0	0	0	0	0	0	0	0	0	0	0	0	0	0	0	0	0	0	0	0	0
aff460e9c25dda86ef4c1acd4253fab9	0	0	0	0	0	0	0	0	0	0	0	0	0	0	0	0	0	0	0	0	0	0	0	0	0	0	0	0	0	0	0	0	0	0	0	0	33	0	0	33	0	0	0	0	0	0	0	0	0
b0cec76d74b173916ea1fa158153bb8a	0	0	0	0	0	0	0	0	0	0	0	0	0	0	0	0	0	0	0	0	0	0	0	14	0	0	0	0	0	14	0	0	0	0	0	0	0	0	0	0	0	0	0	0	0	0	0	0	0
892df514aa7df4336867e7f58483e87c	0	0	0	0	0	0	0	0	0	0	0	0	0	0	0	0	0	0	0	0	0	0	0	0	0	0	0	0	0	0	0	0	0	0	0	0	0	0	0	0	0	0	0	0	0	0	0	0	0
274ce40183da8b88cfd9c285a16c7931	0	0	0	0	0	0	0	0	0	0	0	0	0	0	0	14	0	0	0	14	0	0	0	0	0	0	0	0	0	0	0	0	0	0	0	0	0	0	0	0	0	0	0	0	0	0	0	0	13
f4d38acc5d62cd26f697d1250dd2def0	0	0	0	0	8	0	0	0	0	8	8	0	0	0	0	0	0	0	0	8	0	0	0	0	0	0	0	0	6	6	0	0	7	0	0	0	0	0	0	7	0	0	4	7	0	0	0	0	0
773a445678f920c90178f97c7040472b	0	0	0	0	0	0	0	0	0	0	0	0	0	0	0	0	0	0	0	0	0	0	0	0	0	0	0	0	0	0	0	0	0	0	0	0	0	0	0	0	0	0	0	0	0	0	0	0	0
3bd261c436681c351473040a5c12be93	0	0	0	0	0	0	0	0	0	0	0	0	0	0	0	0	0	0	0	0	0	0	0	0	22	0	0	0	0	22	0	0	0	0	0	0	0	0	0	0	0	0	0	0	0	7	25	0	0
7e891b4967e8446fb859b5a94abc5a16	2	0	3	0	0	0	0	0	0	5	0	6	0	0	0	0	0	0	0	6	0	0	0	5	0	0	0	0	0	5	0	0	0	0	0	0	0	0	0	0	0	0	0	0	0	0	0	0	2
3e6da7652688dadea471fb6332f970a9	0	14	0	0	0	0	0	0	0	14	0	0	9	0	0	0	0	0	0	9	0	0	0	0	0	0	0	0	0	0	0	0	23	0	0	0	0	15	0	38	0	0	0	0	0	0	0	0	0
c14b0ab3d91a3d138568b02a1faaf095	0	0	0	0	0	0	0	0	0	0	0	0	0	0	0	0	0	0	0	0	0	0	0	0	0	0	0	0	0	0	0	0	0	0	0	0	0	0	0	0	0	0	0	0	0	0	0	0	0
d4a84a7a75c9e04921057544967de528	0	0	0	0	0	0	0	0	0	0	0	0	0	0	0	0	0	0	0	0	0	0	0	0	0	0	0	0	0	0	0	0	0	0	0	0	0	0	0	0	0	0	0	0	0	0	0	0	0
4f098ea6e319b7eb8a353098524a5f97	0	0	0	0	0	0	0	0	0	0	0	0	0	0	0	0	0	0	0	0	0	0	0	0	0	0	0	0	0	0	0	0	0	0	0	0	0	0	0	0	0	0	0	0	0	0	0	0	0
828c9a8d40fd1c7c1ebf8b3b414da70d	0	0	0	0	0	0	0	0	0	0	0	0	0	0	0	0	0	0	0	0	0	0	0	0	12	0	0	0	0	12	0	0	0	0	0	0	0	0	0	0	0	0	0	0	0	0	0	0	0
e8215b4a53841f13e057caf3a2f92053	0	0	0	0	0	0	0	0	0	0	0	0	0	0	0	0	0	0	0	0	0	0	0	0	8	0	0	0	0	8	0	0	0	0	0	0	0	0	0	0	0	0	0	0	0	0	0	0	0
3f4f118c0831a3e57c2bba1271863cd1	0	0	0	24	0	23	0	0	0	47	0	0	0	0	0	0	0	0	0	0	0	0	0	0	0	0	0	0	0	0	0	0	0	0	0	0	0	0	0	0	0	0	10	0	0	0	0	0	0
156b9cdd623f4ddc95707e64ac01d951	0	0	0	0	0	0	0	0	0	0	0	0	0	0	0	0	0	0	0	0	0	0	0	0	0	0	0	0	0	0	0	0	0	0	0	0	0	0	0	0	0	0	0	0	0	0	0	0	0
e86bbfb3afded156df565304fd1b15c4	0	0	0	0	0	0	0	0	0	0	0	0	0	0	0	0	0	0	0	0	0	0	0	0	0	0	0	0	0	0	0	0	0	0	0	0	0	0	0	0	0	0	0	0	0	0	0	0	0
376e50539a906530c3d9f7d469408547	0	0	0	0	0	0	0	0	0	0	0	0	0	0	0	0	0	0	0	0	0	0	0	0	0	0	0	0	0	0	0	0	0	0	0	0	0	0	0	0	0	0	0	0	0	0	0	0	0
693b38019b55273ce80fffdcfbbf0de1	0	0	0	0	0	0	0	0	0	0	0	0	0	0	0	0	0	0	0	0	0	0	0	0	0	0	0	0	0	0	0	0	0	0	0	0	0	0	0	0	0	0	0	0	0	8	0	0	0
e42404b0797e5fd58f9ce02e236baedc	0	0	0	0	0	0	0	0	0	0	0	0	0	0	0	0	0	0	0	0	0	0	0	0	0	0	0	0	0	0	0	0	0	0	0	0	0	0	0	0	0	0	0	0	0	0	0	0	0
b7561192d4f0c0c83853ba0bd7aaa9bd	0	0	0	0	0	0	0	0	0	0	0	0	0	0	0	0	0	0	0	0	0	0	0	0	0	0	0	0	0	0	0	0	0	0	0	0	0	0	0	0	0	0	0	0	0	0	0	0	0
476ac6e82d73e95a9b7b976ff90c2f2a	0	0	0	0	0	0	0	0	0	0	0	0	0	0	0	0	0	0	0	0	0	0	0	0	0	0	0	0	0	0	0	0	0	0	0	0	0	0	0	0	0	0	0	0	0	0	0	0	0
95be2b53e5f856d65bd4e4a1cffa9a73	0	0	0	0	0	0	0	0	0	0	0	0	0	0	0	0	0	0	0	0	0	0	0	0	0	0	0	0	0	0	0	0	0	0	0	0	0	0	0	0	0	0	0	0	0	0	0	0	0
1e3b1bd4fb31f3e65f5a56eae9903aa6	0	0	0	0	0	0	0	0	0	0	0	0	0	0	0	0	0	0	0	0	0	0	0	0	0	0	0	0	0	0	0	0	0	0	0	0	0	0	0	0	0	0	0	0	0	0	0	0	0
695cc1fbcb9a0f877be0e98bf663d003	23	0	0	8	0	0	0	6	0	37	0	0	0	0	0	0	0	0	0	0	0	0	0	0	0	0	0	0	0	0	0	18	0	0	0	0	0	0	7	25	0	0	0	0	0	0	0	0	0
1359b4e55808a6444ea405cb100ca60b	0	0	0	0	0	0	0	0	0	0	0	0	0	0	0	0	0	0	0	0	0	0	0	0	0	0	0	0	0	0	0	0	0	0	0	0	0	0	0	0	0	0	0	0	0	0	0	0	0
09562f4049ea0787d85ca09be69eb228	0	0	0	0	0	0	0	0	0	0	0	0	0	0	0	0	0	0	0	0	0	0	0	0	0	0	0	0	0	0	0	0	0	0	0	0	0	0	0	0	0	0	0	0	0	0	0	0	0
51c540aff867cf2a3d50059a63873255	0	0	0	0	0	0	0	0	0	0	0	0	0	0	0	0	0	0	0	0	0	0	0	0	0	0	0	0	0	0	0	0	29	0	0	41	15	39	0	124	0	0	0	0	0	0	0	0	0
de866d8661a04fee72f2a236ed2d184c	26	0	0	0	0	0	0	0	0	26	0	0	0	0	0	0	0	0	0	0	0	0	8	0	0	0	0	0	0	8	0	0	0	0	0	0	0	0	0	0	0	0	0	0	0	0	0	0	0
4c2981ae2db0b4306fd8864dad582614	0	0	0	0	0	0	0	0	0	0	0	0	0	0	0	0	0	0	0	0	0	0	0	0	0	0	0	0	0	0	0	0	0	0	0	0	0	0	0	0	0	0	0	0	0	0	0	0	0
4d4df9d2c3d7f817ba547fa68de15960	0	0	0	0	0	0	0	0	0	0	0	0	0	0	0	0	0	0	0	0	0	0	0	0	0	0	0	0	0	0	0	0	0	0	0	0	0	19	0	19	0	0	0	0	0	0	0	0	0
f502e9068a1aa60b2017d446606870a9	0	0	0	17	25	0	0	0	0	42	0	0	0	0	0	0	0	0	0	0	0	0	0	0	0	0	0	0	0	0	0	0	0	0	0	0	0	0	0	0	0	0	0	0	0	0	0	0	0
c03ea8cc0a528cea259f40683faabd7d	0	0	0	0	0	0	0	0	0	0	0	0	0	0	0	7	0	0	0	7	0	0	0	0	0	0	0	0	0	0	0	0	0	0	0	0	0	0	0	0	0	0	0	0	0	0	0	0	0
d5ee35925a2bed0628a5f0e159f79647	0	0	0	0	0	0	0	0	0	0	0	0	0	0	0	0	0	0	0	0	0	0	0	0	0	0	0	0	0	0	0	0	0	0	0	0	0	0	0	0	0	0	0	0	0	0	0	0	0
77c5e51c0817de5db9c42bc1bcf4dcec	0	0	0	0	0	0	0	0	0	0	0	0	0	0	0	0	0	0	0	0	0	0	0	0	0	0	0	0	0	0	0	0	0	0	0	0	0	0	0	0	0	0	0	0	0	0	0	0	0
16543c6defbeada6d7be3ffaa863423e	0	0	0	0	0	0	0	0	0	0	0	0	0	0	0	0	0	0	0	0	0	0	0	0	0	0	0	0	0	0	0	0	0	0	0	0	0	0	0	0	0	0	0	0	0	0	0	0	0
e5d013268a2041d0a6582a73cb1c5973	0	0	0	0	0	0	0	0	0	0	0	0	0	0	0	0	0	0	0	0	0	0	0	0	0	0	0	0	0	0	0	0	0	0	0	0	0	0	0	0	0	0	0	0	0	0	0	0	0
f0fcd263ebadc400d9c036e1e2fc68df	0	26	0	9	0	0	0	0	0	35	0	0	0	0	0	0	0	0	0	0	0	0	0	0	34	0	0	0	0	34	0	0	0	0	0	0	0	0	0	0	0	0	0	0	29	0	0	0	0
ce1012a1a250e5121f15d8352fc1c6de	0	0	0	0	0	0	0	0	0	0	0	0	0	0	0	0	0	0	0	0	0	0	0	0	0	0	0	0	0	0	0	0	0	0	0	0	0	0	0	0	0	0	0	0	0	0	0	0	0
99da73249d9597f576d8288f023725a3	0	0	0	0	0	0	0	0	0	0	0	0	0	0	0	0	0	0	0	0	0	0	0	0	0	0	0	0	0	0	0	0	0	0	0	0	0	0	0	0	0	0	0	0	0	0	0	0	0
049640599e8a55f2c662d808d076d2e8	0	0	0	0	0	0	0	0	0	0	0	0	0	17	0	0	0	0	0	17	0	0	0	0	0	0	0	0	0	0	0	0	0	0	0	0	0	0	0	0	0	0	0	0	0	0	0	0	0
1b537ba667f1bc80f276f2c06329e18c	0	0	0	0	0	0	0	0	0	0	0	0	0	0	0	0	0	0	0	0	0	0	0	0	0	0	0	0	0	0	0	0	0	0	0	0	0	0	0	0	0	0	0	0	0	0	0	0	0
e68f67fea6596954732b29458fda12ab	0	0	0	0	0	0	0	0	0	0	0	0	0	0	0	0	0	0	0	0	0	0	0	0	0	0	0	0	0	0	0	0	0	0	0	0	0	0	0	0	0	0	0	0	0	0	0	0	0
1b3b6b8875dce1d483e6c6e0b07499f1	0	0	0	0	0	0	0	0	0	0	0	0	0	0	0	0	0	0	0	0	0	0	0	0	0	0	0	0	0	0	0	0	0	0	0	0	0	0	0	0	0	0	0	0	0	0	0	3	0
eaaea07eb05020a229fbe891b4ebbf54	0	0	0	0	0	0	0	0	0	0	6	0	0	0	0	0	23	0	0	29	0	0	13	7	0	0	6	0	0	26	0	0	0	0	0	0	0	0	5	5	49	0	0	0	0	0	0	0	0
12172252489048217023fb7ec0f56c7e	0	0	0	0	0	0	0	0	0	0	0	0	0	0	0	0	0	0	0	0	0	0	7	7	0	0	0	0	0	14	0	0	0	0	0	0	0	9	0	9	0	0	0	0	17	0	0	0	0
d4eab3e7c17e776f6e06ec5f2a5334fc	0	0	0	0	0	0	0	0	0	0	0	0	0	0	0	0	0	0	0	0	0	0	0	0	0	0	0	0	0	0	0	0	0	0	0	0	0	0	0	0	0	0	0	0	0	0	0	0	0
6f53b7410916e43c3bcc90d0b74c72ba	0	0	0	0	0	0	0	3	0	3	0	0	32	0	13	22	0	9	3	79	0	0	0	0	0	0	0	0	0	0	0	17	0	7	0	0	0	0	0	24	11	0	0	0	0	0	0	0	0
34811a0ab78ccc1297f6eb6606bbc541	0	22	0	0	0	0	0	0	0	22	0	0	17	16	0	0	0	0	0	33	0	0	0	0	0	0	0	0	0	0	0	0	0	0	0	0	4	0	0	4	0	0	10	0	0	0	0	0	0
255aa6185780603d6d8adb1dec5fca08	0	0	0	0	0	0	0	0	0	0	0	0	0	0	0	0	0	0	0	0	0	0	0	0	0	0	0	0	18	18	0	0	0	0	0	0	0	21	3	24	0	0	0	0	0	0	0	0	9
d758080c5a93ff359012c455e98ee5ce	0	0	0	7	22	25	0	0	0	54	0	0	0	0	0	0	0	0	0	0	0	0	0	0	0	0	0	0	0	0	0	0	0	0	0	0	0	0	0	0	0	0	0	0	0	0	0	0	0
64bcca2733384308222dbb1363a74ccb	0	0	0	0	0	0	0	0	0	0	0	0	0	0	0	0	0	0	0	0	0	0	0	0	0	0	0	0	0	0	0	0	0	0	0	0	0	0	0	0	0	0	0	0	0	0	0	0	0
713ddcc36ccd492ff0e0578ceea1a25a	0	0	0	0	0	0	0	0	0	0	0	0	0	0	0	0	0	0	0	0	0	0	0	0	0	0	0	0	0	0	0	0	0	0	0	0	0	0	0	0	0	0	0	0	0	0	0	0	0
275e54ad4435d03fc33d74714e977542	0	0	0	0	0	0	0	0	0	0	0	0	0	0	0	0	0	0	0	0	0	0	0	0	0	0	0	0	0	0	0	0	0	0	0	0	0	0	0	0	0	0	0	0	0	0	0	0	0
a77e58bfad4e104885186b3d06c4e146	0	0	0	0	0	0	0	0	0	0	0	0	0	0	0	0	0	0	0	0	0	0	0	0	0	0	0	0	0	0	0	0	0	0	0	0	0	0	0	0	0	0	0	0	26	0	0	0	0
93d893622370c3b6b5fad32693c18c88	0	0	0	0	0	0	0	0	0	0	0	0	0	0	0	0	0	0	0	0	0	0	0	0	0	0	0	0	0	0	0	0	0	0	0	0	0	0	0	0	0	0	0	0	0	0	0	0	0
459ab1859a1d3ef4dfe76ab357d66f1a	0	0	0	0	0	0	0	0	0	0	0	0	0	0	0	0	0	0	0	0	0	0	0	0	0	0	0	0	0	0	0	0	0	0	0	0	0	0	0	0	0	0	0	0	0	0	0	0	0
0c1b528efae8d7f7c1515db3cf7cdf21	0	0	0	0	0	0	0	0	0	0	0	0	0	0	0	0	0	0	0	0	0	0	0	0	0	0	0	0	0	0	0	0	0	0	0	0	0	0	0	0	0	0	0	0	0	0	0	0	0
b630f4c67f245ef28479631557927fbf	0	0	0	0	0	15	0	0	0	15	0	41	18	0	0	0	0	0	0	59	0	0	0	0	0	0	0	0	0	0	0	0	0	0	0	0	0	0	0	0	0	0	0	0	0	0	0	0	0
8764657a618f88cb20235f16cec3e1f7	0	0	0	0	0	0	0	0	0	0	0	0	0	0	0	0	0	0	0	0	0	0	0	0	0	0	0	0	0	0	0	0	16	0	0	51	0	28	0	95	0	0	0	0	0	0	0	0	0
19f6c19c984b238fcefa6ddbc7469d8d	0	0	0	0	0	0	0	0	52	52	0	0	0	0	0	0	0	0	0	0	0	0	0	0	62	0	0	0	0	62	0	0	0	0	0	0	0	0	0	0	0	0	0	0	0	0	0	0	0
4659c34d86831c2d355ea7148bf1f8dc	0	0	0	0	0	0	0	0	0	0	0	0	0	0	0	0	0	0	0	0	0	0	0	0	0	0	0	0	0	0	0	0	0	0	0	0	0	0	0	0	0	0	0	0	0	0	0	0	0
d63eea85998e8e7625c199bed587769d	0	0	0	0	0	0	0	0	0	0	0	0	0	0	0	0	0	0	0	0	0	0	0	0	0	0	0	0	0	0	0	0	0	0	0	0	0	0	0	0	0	0	0	0	0	0	0	0	0
c0c0ad09d478fa7a49d094dede433973	0	0	0	0	0	0	0	0	0	0	0	0	0	0	0	0	0	0	0	0	0	0	0	0	0	0	0	0	0	0	0	0	0	0	0	0	0	0	0	0	0	0	0	0	0	0	0	0	0
3a98540034e4251bfed472bb794ae8f9	0	0	0	0	0	0	0	0	0	0	0	0	0	0	0	0	0	0	0	0	0	0	0	0	0	0	0	0	0	0	0	0	0	0	0	0	0	0	0	0	0	0	0	0	0	0	0	0	0
74dfd5f349b67a550f6fd9abb552c76c	28	0	0	0	0	0	0	0	0	28	0	0	0	0	0	0	0	0	0	0	0	0	0	0	0	0	0	0	0	0	28	0	0	0	0	0	0	0	0	28	0	0	0	0	0	0	0	0	0
350e33548fde6c076b666fd9a8678614	0	8	0	14	0	12	0	0	0	34	0	0	0	0	0	0	0	0	0	0	0	0	0	0	31	0	0	6	0	37	0	0	0	0	0	0	0	0	0	0	0	0	0	0	0	0	0	0	0
c32ecf31860e1cca225772011eff6508	0	0	0	0	0	0	0	7	0	7	12	0	0	0	0	0	0	0	0	12	0	0	4	0	0	0	0	0	0	4	0	0	0	15	0	0	0	0	0	15	0	0	0	0	0	0	0	0	0
f209b9504b8fa8c8511d2772fe3f8f7f	0	0	0	0	0	0	0	0	0	0	0	0	0	0	0	0	0	0	0	0	0	0	0	0	0	0	0	0	0	0	0	0	0	0	0	0	0	0	0	0	0	0	0	0	0	0	0	0	0
47b676f5fd4b05d1bae4f35d390e8e2f	0	0	0	0	0	0	0	0	0	0	0	0	0	0	0	0	0	0	0	0	0	0	0	0	0	0	0	0	0	0	0	0	0	0	0	0	0	0	0	0	0	0	0	0	0	0	0	0	0
f8591556c18a0e57a061aee5c5e8096f	0	0	0	0	0	0	6	0	0	6	0	0	0	0	0	0	0	0	0	0	0	0	0	0	0	0	0	0	0	0	0	0	0	0	11	0	0	0	0	11	0	0	0	0	0	0	0	0	0
02d488f291d34c83d93f58071a319e34	0	0	0	0	0	0	0	0	0	0	0	0	0	0	0	0	0	0	0	0	0	0	0	0	0	0	0	0	0	0	0	0	0	0	0	0	0	0	0	0	0	0	0	0	0	0	0	0	0
318d4eb6c0259b5591cd2d90d4857fea	0	0	0	0	0	0	0	0	0	0	0	0	0	0	0	0	0	0	0	0	0	0	0	0	0	0	0	0	0	0	0	0	0	0	0	0	0	0	0	0	0	0	0	0	0	0	0	0	0
fffc271c3a6e4a9f0370bfbd7a33d649	0	0	0	0	0	0	0	0	0	0	0	0	0	0	0	0	0	0	0	0	0	0	0	0	0	0	0	0	0	0	0	0	0	0	0	0	0	0	0	0	0	0	0	0	0	0	0	0	0
2e9663ccc7912cbfa5b64f052f0f4c6f	0	0	0	0	0	0	0	0	0	0	0	0	0	0	0	0	0	0	0	0	0	0	3	0	0	0	0	0	0	3	0	0	0	0	3	0	0	0	0	3	0	0	0	0	0	0	0	0	0
62b5c9ab09277c5542150477beb7fa92	0	0	0	0	0	0	0	0	0	0	0	0	0	0	0	0	0	0	0	0	0	0	0	0	0	0	0	0	0	0	0	0	0	16	0	0	0	0	0	16	0	0	0	0	0	0	0	0	0
47062c3b3c195f885283bc70d966aa0f	0	0	0	0	0	0	0	0	0	0	0	0	0	0	0	0	0	0	0	0	8	0	0	0	0	0	0	0	0	8	0	0	0	0	0	0	0	0	0	0	0	0	0	0	0	0	0	0	0
d36d9b0362f257d48751e319768e00e8	0	0	0	0	0	0	0	0	0	0	0	0	0	0	0	0	0	0	0	0	0	0	0	0	0	0	0	0	0	0	0	0	0	0	0	0	0	0	0	0	0	0	0	0	0	0	0	0	0
1ecb02ba09ea428eb2e0b409cca3a709	0	0	0	0	0	0	0	0	0	0	0	0	0	0	0	0	0	0	0	0	0	0	0	0	0	0	0	0	0	0	0	0	0	0	0	0	0	0	0	0	0	0	0	0	0	0	0	0	0
947ee442cd60aa06272a03d60e9f14b7	0	18	0	0	11	0	8	0	19	56	0	0	0	0	0	0	0	0	0	0	0	0	0	0	0	0	0	0	0	0	0	0	0	0	0	0	0	0	0	0	15	0	0	0	0	0	0	0	0
fd486e1217edde04d9d7c639120dcf93	0	0	0	0	12	0	0	0	0	12	0	0	0	0	0	0	0	0	0	0	0	0	0	0	0	0	0	0	0	0	0	0	0	0	0	0	0	0	0	0	0	0	0	0	0	0	0	0	0
48355024c2db67714df1593ec6f85b33	0	0	0	0	0	0	0	0	0	0	0	0	0	0	0	0	0	0	0	0	0	0	0	0	0	0	0	0	0	0	0	0	0	0	0	0	0	0	0	0	0	0	0	0	0	0	0	0	0
0b3b3ded8d3c08b207c01d053d583a3d	0	0	7	0	0	0	12	0	0	19	0	0	0	0	0	0	0	0	0	0	0	0	0	5	0	0	0	0	0	5	0	0	0	0	0	0	0	0	0	0	0	0	0	0	0	0	0	0	0
24431c2466d5c44229bcf53d4be99f0e	0	0	0	0	0	0	0	0	0	0	0	0	0	0	0	0	0	0	0	0	0	0	0	0	0	0	0	0	0	0	0	0	0	0	0	0	0	0	0	0	0	0	0	0	0	0	0	0	0
abe77eb78b496df6f47699f877159d4f	0	0	0	0	0	0	0	0	0	0	0	0	0	0	0	0	0	0	0	0	0	0	0	0	0	0	0	0	0	0	0	0	0	0	0	0	0	0	0	0	0	0	0	0	0	0	0	0	0
504a18d8bf2f51cd7ba6222b9d6e0d21	0	0	0	0	0	0	0	0	0	0	0	0	0	0	0	0	0	0	0	0	0	0	0	0	0	0	0	0	0	0	0	0	0	0	0	0	0	0	0	0	0	0	0	0	0	0	0	0	0
d54665fbaabf2e336fcd664ce378dc73	0	0	0	0	0	0	0	0	0	0	0	0	0	0	0	0	0	0	0	0	0	0	0	0	0	0	0	0	0	0	0	0	0	0	0	0	0	0	0	0	0	0	0	0	0	0	0	0	0
2542fb9a5ea00ea4b5070447526c10c8	0	0	0	0	17	11	0	0	0	28	0	0	0	0	0	0	0	0	0	0	0	0	0	0	0	0	0	0	0	0	0	0	0	0	0	0	0	0	0	0	0	0	0	0	0	0	0	0	0
4f10b862ed066373b67cc9cd3397c347	0	0	0	12	0	0	0	0	0	12	0	0	0	0	0	0	0	0	0	0	0	0	0	0	46	0	0	9	0	55	0	0	0	0	4	0	0	0	6	10	0	0	0	0	6	5	0	0	0
ccadd15f2dc0626eb80449cf2a413d0b	27	0	0	0	0	0	0	0	0	27	0	0	0	0	0	0	0	0	0	0	0	0	0	0	0	0	0	0	0	0	0	0	0	0	0	0	0	0	0	0	0	0	0	0	0	0	0	0	0
300cbbb43853225be56e3eb7d65f5250	6	0	0	0	0	0	0	0	0	6	0	0	0	0	0	0	0	0	0	0	0	0	0	8	0	0	0	0	0	8	0	0	0	22	0	0	0	0	0	22	0	0	0	0	0	0	10	0	0
0b9e7687c32436bb48f677d230e9ddb0	0	0	0	0	0	0	0	0	0	0	0	0	0	0	0	0	6	0	0	6	0	0	0	0	0	0	0	0	0	0	0	0	0	0	0	0	0	0	0	0	0	0	0	0	0	0	0	0	0
e505b5b74d9bb1dd7e4fa51e3f5fbfc5	0	0	0	0	0	0	0	0	0	0	0	0	0	0	0	0	0	0	0	0	0	0	0	0	0	0	0	0	0	0	0	0	0	0	0	0	0	0	0	0	0	0	0	0	0	0	0	0	0
03c7df8c3f92addff3c8d1c85399411e	0	0	0	0	0	0	0	0	0	0	0	0	0	0	0	0	0	0	0	0	0	0	0	0	0	0	0	0	0	0	0	0	0	0	0	0	0	0	0	0	0	0	0	0	0	0	0	0	0
9e4c5d4fb55c7cb5c97fd17e4460ba77	0	24	0	0	0	0	0	0	0	24	0	0	0	0	0	0	0	0	0	0	0	0	0	0	0	0	0	15	0	15	0	0	0	0	6	0	0	0	0	6	0	0	0	0	0	0	0	0	0
58a071293e61025ab099ebe036028594	0	0	0	0	0	0	0	0	0	0	0	0	0	0	0	0	0	0	0	0	0	0	0	0	0	0	0	0	0	0	0	0	0	0	0	0	0	0	0	0	0	0	0	0	0	0	0	0	0
99d5ecc333f36576f1da632f885a84c3	0	0	0	0	0	0	0	0	0	0	0	0	0	0	0	0	0	0	0	0	0	0	0	0	0	0	0	0	0	0	0	0	0	0	0	0	0	0	0	0	0	0	0	0	0	0	0	0	0
5dcc538d957267f0aa28d18d84afe774	0	0	0	0	0	0	0	0	0	0	0	0	0	0	0	0	0	0	0	0	0	0	0	0	0	0	0	0	0	0	0	0	0	0	0	0	0	0	0	0	0	0	0	0	0	0	0	0	0
aecc25dab1d03aff16534a2f46b33837	0	0	0	0	0	0	0	0	0	0	0	0	0	0	0	0	0	0	0	0	0	0	0	0	0	0	0	0	0	0	0	0	0	0	0	0	0	0	0	0	6	0	0	0	0	0	0	0	0
4f854f0d1b5d5ee872642fab067364f3	0	0	0	0	0	9	0	0	0	9	7	0	0	0	0	0	0	0	0	7	0	0	0	0	0	0	0	0	0	0	0	0	0	0	0	0	0	0	0	0	0	0	0	0	0	0	0	0	0
82e41120ad18626879cb9df42c61efd3	0	0	0	0	0	14	0	0	38	52	0	0	0	0	0	11	0	7	0	18	0	0	9	0	0	0	0	0	0	9	0	0	0	0	0	0	0	0	0	0	0	0	0	0	0	0	0	0	0
d0c723537959948105a76b5e0814d002	0	0	0	0	0	0	0	0	0	0	0	0	0	0	0	0	0	0	0	0	0	0	0	0	0	0	0	0	0	0	0	0	0	0	13	17	0	0	0	30	0	0	0	0	0	0	0	0	0
d6da331b525c29b977ce2c0e88e07d2b	0	0	0	0	0	0	0	0	0	0	0	0	0	0	0	0	0	0	0	0	0	0	0	0	0	0	0	0	0	0	0	0	0	0	0	7	0	0	0	7	0	0	0	0	0	0	0	0	0
be2658b1e12db6a894c81c2f31f0e4ac	0	0	0	0	0	0	0	0	0	0	0	0	0	0	0	0	0	0	0	0	0	0	0	0	0	0	0	0	0	0	0	0	0	0	0	0	0	0	0	0	0	0	0	0	0	0	0	0	0
af7e0f7a536a2e9e415ed6d2843e3014	0	0	0	0	0	0	0	0	0	0	0	0	0	0	0	0	0	0	0	0	0	0	0	0	0	0	0	0	0	0	0	0	0	0	0	0	0	0	0	0	0	0	0	0	0	0	0	0	0
9884b66dfa1d30590ebeed2917d52019	0	0	0	0	0	0	0	0	0	0	0	0	0	0	0	0	0	0	0	0	0	0	0	0	0	5	0	0	0	5	0	0	0	0	0	0	0	0	0	0	0	0	0	0	0	0	0	0	0
8e3825e028efe74e712358a026550f1e	0	0	0	0	0	0	0	0	0	0	0	0	0	0	0	0	0	0	0	0	15	0	0	0	0	0	0	0	0	15	0	0	0	0	0	0	0	0	0	0	0	0	0	0	0	0	0	0	0
5272b246d186567ccc7beab9e850b0a7	0	0	0	0	0	0	0	0	0	0	0	0	0	0	0	0	0	0	0	0	0	0	0	0	0	0	0	0	0	0	0	0	0	0	0	0	0	0	0	0	0	0	0	0	0	0	0	0	0
5b12688d01103d971b546d99288d1abe	0	0	0	0	0	0	0	0	0	0	0	0	0	0	0	0	0	0	0	0	0	0	0	0	0	0	0	0	0	0	0	0	0	0	0	0	0	0	0	0	0	0	0	0	0	0	0	0	0
d4f8957b61d090b9ffc62efa568701e9	0	0	0	0	0	4	0	0	0	4	0	0	0	0	0	0	0	11	0	11	0	0	0	0	0	0	0	0	0	0	0	0	0	0	0	0	0	0	0	0	21	0	0	0	0	0	0	0	0
41a2169a33a09e04033f948ef1f63d04	0	0	0	0	0	0	0	0	0	0	0	0	0	0	0	0	0	0	0	0	0	0	0	0	0	0	0	0	0	0	0	0	0	0	0	0	0	0	0	0	0	0	0	0	0	0	0	0	0
cbae1a91cf2c2fe0435f4d3182d21961	0	0	0	0	0	0	0	0	0	0	18	0	0	0	0	0	0	0	20	38	0	0	0	0	0	0	0	0	0	0	0	0	0	0	0	0	0	0	0	0	0	0	0	0	0	0	0	0	0
9051643c4b680f246441563f93b2edd8	0	0	0	0	0	0	0	0	0	0	0	0	0	0	0	0	0	0	0	0	0	0	0	0	0	0	0	0	0	0	0	0	0	0	0	0	0	0	0	0	0	0	0	0	0	0	0	0	0
5313a6baead1af04cba735bb606c17a3	0	0	0	0	0	0	0	0	0	0	0	0	0	0	0	0	0	0	0	0	0	0	0	0	0	0	0	0	0	0	0	0	0	0	0	0	0	0	0	0	0	0	0	0	0	0	0	0	0
532c5fb074b20469bc70fcd36d2f46f6	0	0	0	0	0	0	0	0	0	0	0	0	0	0	0	0	0	0	0	0	0	0	0	0	0	0	0	0	0	0	0	0	0	0	0	0	0	0	0	0	0	0	0	0	0	0	0	0	0
4f8b98b0952ad95dd2cb6502f88cf3bd	0	0	0	0	0	0	0	0	0	0	0	0	0	0	0	0	0	0	4	4	0	0	0	0	0	0	0	0	0	0	0	0	0	0	0	0	0	0	0	0	0	0	0	0	0	8	0	0	0
180b462c4c06d72493f5751be59ee6ab	0	0	0	0	0	24	0	0	0	24	0	0	0	0	0	0	0	0	0	0	0	0	0	0	0	0	0	8	0	8	0	0	4	0	6	3	0	0	5	18	0	0	0	0	0	8	2	0	5
200519d6ef1edd1e54533831fe5fe4f7	0	0	0	0	0	0	0	0	0	0	0	0	0	0	0	0	14	0	0	14	0	0	0	0	0	0	0	0	0	0	0	0	0	0	0	0	0	0	0	0	0	0	0	0	0	0	0	0	0
1827852fa6636d6d150fbc89931829e2	0	0	0	0	0	0	0	0	0	0	0	0	0	0	0	0	0	0	0	0	0	0	0	0	0	0	0	0	0	0	0	0	0	0	0	0	0	0	0	0	0	0	0	0	0	0	0	0	0
929b1a7b6d03dacfe9c880445df343cf	0	17	0	0	0	0	0	0	0	17	0	0	0	9	0	0	0	0	0	9	0	0	0	0	0	0	0	0	0	0	0	0	0	0	0	0	0	0	0	0	0	0	0	0	0	0	0	0	0
d163d8e0464b5d0118f6b6c5e8065e54	0	0	0	0	0	0	0	3	0	3	0	0	0	0	0	0	0	14	0	14	0	0	0	8	0	0	0	7	0	15	0	0	0	3	0	0	0	0	0	3	0	0	0	0	0	0	0	0	0
ad236074fe95f90a2a0df2a2487c6ea1	0	0	0	0	0	0	0	0	0	0	0	0	0	0	0	0	0	0	0	0	0	0	0	0	0	0	0	0	0	0	0	0	0	0	0	0	0	0	0	0	0	0	0	0	0	0	0	0	0
daf127e62bff678c6f85afe0e84249a3	0	9	0	0	0	19	0	0	0	28	0	0	0	0	0	0	0	0	0	0	0	0	0	0	0	0	0	0	0	0	0	0	0	0	9	0	0	0	28	37	0	0	0	0	0	0	0	0	0
80b1fab46144ba37edadda6002c490b1	0	0	0	0	0	0	0	0	0	0	0	0	0	0	0	0	0	0	0	0	0	0	0	0	0	0	0	0	0	0	0	0	0	0	0	0	0	0	0	0	0	0	0	0	0	0	0	0	0
c0046175e962959cc7f512d2e8e78f92	0	0	0	0	0	0	0	0	0	0	0	0	0	0	0	0	0	0	0	0	0	0	0	0	0	0	0	0	0	0	0	0	0	0	0	0	0	0	0	0	0	0	0	0	0	0	0	0	0
19efc7cd4754ecba9589a442d3c61f86	0	0	0	0	0	0	0	0	0	0	0	0	0	0	0	0	0	0	0	0	0	0	0	0	0	0	0	0	0	0	39	0	0	0	0	0	0	0	0	39	0	0	0	3	0	0	0	0	0
068291a055ce0c8770e044a9ceff8e44	0	0	0	0	0	0	0	0	0	0	0	0	11	0	0	0	0	0	0	11	0	0	0	0	0	0	0	0	0	0	0	0	0	0	0	0	0	0	0	0	0	0	0	0	0	0	0	0	0
df2160641d6e04367aa1b27a9be6703d	0	0	0	0	0	0	0	0	0	0	0	0	0	0	0	0	0	0	0	0	0	0	0	0	0	0	0	0	6	6	0	0	0	0	0	0	0	0	0	0	0	0	0	0	0	0	0	0	0
a403df61ba876340165b2beadd551f7e	0	0	0	0	0	0	0	0	0	0	0	0	0	0	0	0	0	0	0	0	0	0	0	0	0	0	0	0	0	0	0	0	0	0	0	0	0	0	0	0	0	0	0	0	0	0	0	0	0
b9a4e4f25e302b09a55d0fca012cd672	0	0	0	0	0	0	0	0	0	0	0	0	0	0	0	0	0	0	0	0	0	0	0	0	0	0	0	0	0	0	0	0	0	0	0	0	0	0	0	0	0	0	0	0	0	0	0	0	0
ebe48ac4db0d1ab3b3cc6231f705c2e0	0	0	0	0	0	0	0	0	0	0	0	0	0	0	0	0	0	0	0	0	0	0	0	0	0	0	0	0	0	0	97	0	0	0	0	0	0	0	0	97	0	0	0	0	0	0	0	0	0
43965e6fd97914b387bb0d21a470f96f	22	14	0	0	0	0	0	0	0	36	0	0	0	0	0	0	0	0	0	0	0	0	0	0	0	0	0	0	0	0	0	0	0	0	0	0	0	0	0	0	0	0	0	0	0	0	0	0	0
0c3cb9a7efe659fa75e2d6ffaf7e6f43	0	0	0	0	0	0	0	0	0	0	0	0	0	0	0	0	0	0	0	0	0	0	0	0	0	0	0	0	0	0	0	0	0	0	0	0	0	0	0	0	0	0	0	0	0	0	0	0	0
07414c31337988d9e61e7e51377e96cc	0	0	0	0	0	0	0	0	0	0	0	0	0	0	0	0	0	0	0	0	0	0	0	0	0	0	0	0	0	0	0	0	0	0	0	0	0	0	0	0	0	0	0	0	0	0	0	0	0
f9f87d90a49535c47efc8000068af171	0	0	0	0	47	0	0	0	0	47	0	0	0	0	0	0	0	0	0	0	0	0	0	0	0	0	0	0	0	0	0	0	0	0	0	0	0	0	0	0	0	0	0	0	0	0	0	0	0
0717a7806e14ab2d5de086b02bac9b93	0	0	0	0	0	0	0	0	0	0	0	0	0	0	0	0	0	0	0	0	0	0	0	0	0	0	0	0	0	0	0	0	37	0	0	0	0	0	0	37	0	0	0	0	0	0	0	0	0
34075a4c0bebd700bd1e9426e9ae7f44	0	0	0	0	0	0	0	0	96	96	0	0	0	0	0	0	0	0	0	0	0	0	0	0	0	0	0	0	0	0	0	0	0	0	0	0	0	0	0	0	0	0	0	0	0	0	0	0	0
e347fb8f2e83d95944e98b02d4c29259	0	0	0	0	0	0	0	0	0	0	0	0	0	0	0	0	0	0	0	0	0	0	0	0	0	0	0	0	0	0	0	0	0	0	0	0	0	0	0	0	0	0	0	0	0	0	0	0	0
331250033820f2615f47d44edae9a0ff	0	0	0	0	13	0	0	0	0	13	0	0	0	0	0	0	0	0	0	0	0	0	0	0	0	0	0	0	0	0	0	0	0	0	0	0	0	0	0	0	12	0	0	0	0	0	0	0	0
9643e3d2268de9f5e5d551f6737cb7fa	0	0	0	0	0	0	0	0	0	0	0	0	0	0	0	0	0	0	0	0	0	0	0	0	0	0	0	0	0	0	0	0	0	0	0	0	0	0	0	0	0	0	0	0	0	0	0	0	0
d2d1fb71bbb41e66cbb9b73aa851c642	0	0	0	0	95	0	0	0	0	95	0	0	0	0	0	0	0	0	0	0	0	0	0	0	0	0	0	0	0	0	0	0	0	0	0	0	0	0	0	0	0	0	0	0	0	0	0	0	0
f188cff5c4d61419484ec9f58f485ba3	0	0	0	0	0	0	0	0	0	0	0	0	0	0	0	0	0	0	0	0	0	0	0	0	0	0	0	0	0	0	0	0	0	0	0	0	0	0	0	0	0	0	0	0	0	0	0	0	0
eaa22c72d2775b7de59ebbaf7dce2929	0	0	0	0	0	0	0	0	0	0	0	0	0	0	0	0	0	0	0	0	0	0	0	0	0	0	0	0	0	0	0	0	0	0	0	0	0	0	0	0	0	0	0	0	0	0	0	0	0
52e2f525a4dd2bd15122b3fb38232c90	0	0	0	0	0	0	0	0	0	0	0	0	0	0	0	0	0	0	0	0	0	0	0	0	0	0	0	0	0	0	0	0	0	0	0	0	0	0	0	0	0	0	0	0	0	0	0	0	0
8e064056fbdf8090332ff6a49b5dc92f	0	0	0	0	0	0	0	0	0	0	0	0	0	11	0	8	0	0	0	19	0	0	8	0	0	0	0	0	0	8	0	0	18	9	0	0	0	0	0	27	0	0	0	0	0	0	0	0	0
3dcca60c2eef4ff48c7bd487f3166475	0	0	0	0	0	0	0	0	0	0	0	0	0	0	0	0	0	0	0	0	0	0	0	0	0	0	0	0	0	0	0	0	0	0	0	0	0	0	0	0	0	0	0	0	0	0	0	0	0
3878e24c47b4a19e442f4330cd7562c8	0	0	0	0	0	0	0	0	0	0	0	0	0	0	0	0	0	0	0	0	0	0	0	0	0	0	0	0	0	0	0	0	0	0	0	0	0	0	0	0	0	0	0	0	0	0	0	0	0
131c83416d7dcf50b30e597086518d04	0	0	8	0	0	0	0	0	0	8	0	0	0	0	0	0	0	0	0	0	0	0	0	0	0	0	0	0	0	0	4	0	0	0	0	0	0	0	0	4	0	0	0	0	35	0	0	0	0
fb3d46cfe37df945f9e846a8102be023	0	0	0	0	0	0	0	0	0	0	0	0	0	0	0	0	0	0	0	0	0	0	0	0	0	0	0	0	0	0	0	0	0	0	0	0	0	0	0	0	0	3	0	0	0	0	0	0	0
3478c2ec4ef7e205f259e419c1f368b3	19	0	0	0	0	0	0	0	0	19	0	0	0	0	0	0	0	0	0	0	0	0	0	0	0	0	0	0	0	0	0	0	0	0	0	3	0	0	0	3	0	0	0	0	0	0	0	0	0
47ae187614ee530aeede84743ea5575e	0	0	0	0	0	0	0	0	0	0	0	0	0	0	0	0	0	0	0	0	0	0	0	0	0	0	0	0	0	0	0	0	0	0	0	0	0	0	0	0	0	0	0	0	0	0	0	0	0
1bec2862d4038698c7e2da4eaf23a56d	0	0	0	0	0	0	0	0	0	0	0	60	22	0	0	0	0	0	0	82	0	0	0	0	0	0	0	0	0	0	0	0	0	0	0	0	0	0	0	0	0	0	0	0	0	0	0	0	0
1adb80544065440fdfb3336e130c7a5d	0	0	0	0	0	0	0	0	0	0	0	0	0	0	0	0	0	0	0	0	0	0	0	0	0	0	0	0	0	0	0	0	0	0	0	0	0	0	0	0	0	0	0	0	0	0	0	0	0
b90fead7c9736fa780c3d375546c06c8	0	0	0	0	0	0	0	0	0	0	0	0	0	0	0	0	0	0	0	0	0	0	0	0	0	0	0	0	0	0	0	0	0	0	0	0	0	0	0	0	0	0	0	0	0	0	0	0	0
a00aed81524b105db38a6fb5574d2b59	0	0	0	0	0	0	0	0	0	0	0	0	0	0	0	0	0	0	0	0	0	0	0	0	0	0	0	0	0	0	0	0	0	0	0	0	0	0	0	0	0	0	0	0	0	0	0	0	0
f95697ee728055484c0e2ffacc29bda3	0	0	0	0	0	0	0	0	0	0	0	0	0	0	0	0	0	0	0	0	0	0	0	0	0	0	0	0	0	0	0	0	0	0	0	0	0	0	0	0	0	0	0	0	0	0	0	0	0
61b1ee428cc6e7123ac8315f11389769	0	0	0	0	0	0	0	0	0	0	0	0	0	0	0	0	0	0	0	0	0	0	0	0	0	0	0	0	0	0	0	0	0	0	0	0	0	0	0	0	0	0	0	0	0	0	0	0	0
a576a23824599d69223ab0e3670b26a3	0	0	0	0	0	0	0	0	0	0	0	0	0	0	0	0	0	0	26	26	0	0	0	0	0	0	0	0	0	0	0	0	0	0	0	0	0	0	0	0	0	0	0	0	0	0	0	0	0
58c54ccd5760aef535672c065964119c	0	0	0	0	0	0	0	0	0	0	0	0	0	0	0	0	0	0	0	0	0	0	0	0	0	0	0	0	0	0	0	0	0	0	0	0	0	0	0	0	0	0	0	0	0	0	0	0	0
1696998e9d4b49f18ea083c55f9ac6c8	0	0	0	0	0	0	0	0	0	0	0	0	0	0	0	0	0	0	0	0	0	0	0	0	0	0	0	0	0	0	0	0	0	0	0	0	0	0	0	0	0	0	0	0	0	0	0	0	0
0f5c4d91d080239942fd165c4b3bf789	0	0	0	0	0	6	0	0	0	6	0	0	0	0	0	0	0	0	0	0	0	0	0	0	0	0	0	0	0	0	3	0	0	0	0	0	0	0	0	3	0	0	0	0	0	0	0	0	0
afa5864a7f98d46c2c0d3f5d075cff27	0	0	0	0	0	0	0	0	0	0	0	17	0	0	0	0	0	0	0	17	0	0	0	0	0	0	0	0	0	0	35	0	14	11	0	6	0	0	0	66	0	0	0	0	0	0	0	0	0
4a91118c3af10aa3da551dcfa075fa3c	0	0	0	0	0	0	0	0	0	0	0	0	0	0	0	0	0	0	0	0	0	0	0	0	0	0	0	0	0	0	0	0	0	0	0	0	0	0	12	12	0	0	0	0	0	0	0	0	0
507cc04d137ed7da924895289d0e4d52	0	0	0	0	0	0	0	0	0	0	0	0	0	0	0	0	0	0	0	0	0	0	0	0	0	0	0	0	0	0	0	0	0	0	0	0	0	0	0	0	0	0	0	0	0	0	0	0	0
4874cd45fee4b5151d630c3e61ce02e3	0	0	0	0	0	0	0	0	0	0	0	0	0	0	0	0	0	0	0	0	0	0	0	0	0	0	0	0	0	0	0	0	0	0	0	0	0	0	0	0	0	0	0	0	0	0	0	0	0
511a45ed69f1a03dcc678867ca41df90	0	23	0	0	0	0	10	0	0	33	0	0	0	0	0	0	0	0	0	0	0	0	0	0	29	0	0	0	0	29	0	0	0	0	0	0	0	0	0	0	0	0	0	0	0	0	0	9	0
5c3ef828447599fbad78f2ac1320d47f	0	0	0	0	0	0	0	0	0	0	0	23	0	0	0	0	0	0	0	23	0	0	0	0	0	0	0	0	0	0	0	0	0	0	0	0	0	0	0	0	0	0	0	0	0	0	0	0	0
d027852cfb21efc44a0ec18b4680e775	0	0	0	4	21	0	0	0	0	25	0	0	0	0	0	0	0	0	0	0	9	0	0	0	0	0	0	0	0	9	5	0	0	0	0	0	0	0	0	5	0	0	0	0	0	0	0	0	0
8f079f7c0369b7920bdcb92498b9944f	0	0	0	0	0	0	0	0	0	0	0	0	0	0	0	0	0	0	0	0	0	0	0	0	0	0	0	0	0	0	0	0	0	0	0	0	0	0	0	0	0	0	0	0	0	0	0	0	0
f1a621303c4a45ff959e2e6c0c5703cb	0	0	0	0	0	0	0	0	0	0	0	0	0	0	0	0	0	0	0	0	0	0	0	0	0	0	0	0	0	0	0	0	0	0	0	0	0	0	0	0	0	0	0	0	0	0	0	0	0
f9456be160af6debbc5c6fa3a3d1a6a3	0	0	0	0	0	0	0	0	0	0	0	0	0	0	0	0	0	0	0	0	0	0	0	0	0	0	0	0	0	0	0	0	0	0	0	0	0	0	0	0	0	0	0	0	0	0	0	0	0
7664362da1acb7a23b4a94256ed6f0ce	20	0	0	0	0	0	0	0	0	20	0	0	0	0	0	0	0	0	0	0	0	0	0	0	0	0	0	0	0	0	0	0	0	0	0	0	0	0	0	0	0	0	0	0	0	0	0	0	0
e9bc50c5fad8800e91c1386b0ea75062	0	0	0	0	0	0	0	0	0	0	0	0	0	0	0	0	10	0	0	10	0	0	0	0	0	0	0	0	0	0	0	0	0	0	0	0	0	0	0	0	0	0	12	0	0	0	0	0	0
99078232fd3297c18796b1ad8f1f058a	0	0	0	0	0	0	0	0	0	0	0	0	0	0	0	0	0	0	0	0	0	0	0	3	0	0	0	0	0	3	0	0	0	0	0	0	0	0	0	0	0	0	0	0	0	0	0	0	0
892750b964be3ea276b7aef36db90919	0	0	0	0	0	0	0	0	0	0	0	0	0	0	0	0	0	0	0	0	0	0	0	0	0	0	0	0	0	0	0	0	0	0	0	0	0	0	0	0	0	0	0	0	0	0	0	0	0
8ffacc539aa97fcbdecbae97dc919ee8	0	0	0	0	0	0	0	0	0	0	0	0	0	0	0	0	0	0	0	0	0	0	0	0	0	0	0	0	0	0	0	0	0	0	0	0	0	0	0	0	0	0	0	0	0	0	0	0	0
a6959b2f459a7b3bd86b44f81b7ea5d1	0	0	0	0	0	0	0	0	0	0	0	0	0	0	0	0	0	0	0	0	0	0	0	0	0	0	0	0	0	0	0	0	0	0	0	0	0	0	0	0	0	0	0	0	0	0	0	0	0
9f3a747cdfea59fc08bac99ba3fe7a7c	0	0	0	38	0	0	0	0	0	38	0	0	0	0	0	0	0	0	0	0	0	0	0	0	0	0	0	0	18	18	0	0	0	0	10	0	0	0	0	10	0	0	0	0	0	0	0	0	0
7efc503ed41dc3c4c68deb7cdd9e31b9	0	0	0	0	0	0	0	0	0	0	0	0	0	0	0	0	0	0	0	0	0	0	0	0	0	0	0	0	0	0	0	0	0	0	0	0	0	0	0	0	0	0	0	0	0	0	0	0	0
5ddc2d61725a9fe08b72fd6c2714b1ea	0	0	0	0	0	0	0	0	0	0	0	0	0	0	0	0	0	0	0	0	0	0	0	0	0	0	0	0	0	0	0	0	0	0	0	0	0	0	0	0	0	0	0	0	0	0	0	0	0
4ae62ffb66618619efdffd696e6b97a4	0	0	0	0	0	0	0	0	0	0	0	0	0	0	0	0	0	0	0	0	0	0	0	0	0	0	0	0	0	0	0	0	0	0	0	0	0	0	0	0	0	0	0	0	0	0	0	0	0
be01b0d04a1ddb8ba31abe685f71aeb8	0	0	4	0	0	0	0	0	0	4	0	0	0	0	0	0	0	0	44	44	0	0	0	0	0	0	0	0	0	0	0	0	0	0	0	0	0	0	0	0	0	0	0	0	0	0	0	0	0
bc416577f3b71951626e8c248ac086c1	0	0	0	0	0	0	0	0	0	0	8	0	0	0	0	0	0	0	0	8	0	0	0	0	0	0	0	0	0	0	0	0	0	0	0	0	0	0	0	0	0	0	19	0	0	0	0	0	0
00a6523b67af5706fcf22f1cc4f15778	0	0	0	0	0	0	0	0	0	0	0	0	0	0	0	11	0	0	0	11	0	0	0	0	0	0	0	0	0	0	0	0	0	0	0	0	0	0	0	0	0	0	0	0	0	0	0	0	0
3d61429d944db63cf9ad953f513280b4	0	0	0	0	0	0	0	0	0	0	0	0	0	0	0	0	0	0	0	0	0	0	0	0	0	0	0	0	0	0	0	0	0	0	0	0	0	0	0	0	0	0	0	0	0	0	0	0	0
4a6c08734bb3b61a100246834bea03be	0	0	0	0	0	0	0	0	0	0	0	0	0	0	0	0	0	0	0	0	0	0	3	0	0	0	0	0	0	3	0	0	0	0	0	0	0	0	0	0	0	0	0	0	0	0	0	0	0
b333ee98c6d6440a1c40ea3675ad2560	0	0	0	0	0	0	12	0	0	12	0	0	0	0	0	0	0	0	0	0	0	0	0	0	0	0	0	0	0	0	0	0	0	0	0	0	0	0	0	0	0	0	0	0	0	0	0	0	0
be14599fd7c8d7f47525ef12dfc3f960	0	0	0	0	0	0	0	0	0	0	0	0	0	0	0	0	0	0	0	0	0	0	0	0	0	0	0	0	0	0	0	0	0	0	0	0	0	0	0	0	0	0	0	0	0	0	0	0	0
81712fc35cdb15f00c151879ee2107f2	0	0	0	0	0	0	0	0	0	0	0	0	0	0	0	0	0	0	0	0	0	0	0	0	0	0	0	0	0	0	0	0	0	0	0	0	0	0	0	0	0	0	0	0	0	0	0	0	0
46d6143b3381b89b84aa08622f78f3e4	0	0	0	0	0	0	0	0	0	0	0	0	0	0	0	0	0	0	0	0	0	0	0	0	0	0	0	0	0	0	0	0	0	0	0	0	0	0	0	0	0	0	0	0	0	0	0	0	0
a93cde12e913f11455bff2aad9b8b43a	0	0	0	0	0	0	0	0	0	0	0	0	0	0	0	0	0	0	0	0	0	0	0	0	0	0	0	0	0	0	0	0	0	0	0	0	0	0	0	0	0	0	0	0	0	0	0	0	0
53f3f0d4aa38469fe779b6c6f7765e9a	0	0	0	0	0	0	0	0	0	0	0	0	0	0	0	0	0	0	0	0	0	0	0	0	0	0	0	0	0	0	0	0	0	0	0	0	0	11	0	11	0	0	0	0	0	0	0	0	0
f228b170bd0585eb848e23814c35f439	0	0	0	0	0	0	0	0	0	0	0	0	0	0	0	0	0	0	0	0	0	0	0	0	0	0	0	0	0	0	0	0	0	0	0	0	0	0	0	0	0	0	0	18	24	0	0	0	0
f4598bf8fcc13923cdceeffb390e7d71	0	0	0	0	0	0	0	0	8	8	0	0	0	0	0	0	0	0	0	0	0	0	0	0	0	0	0	0	0	0	0	0	0	0	0	0	0	0	0	0	9	0	0	0	0	0	0	0	0
fea8590b48fc4db94b427eebfe56136c	0	0	14	0	0	0	0	0	0	14	0	5	0	0	0	0	0	0	0	5	0	0	0	0	0	10	0	0	0	10	0	0	7	0	0	0	0	0	0	7	0	0	0	0	0	0	0	0	0
f58a1ae12997ad635148e09823ca2b1e	0	0	0	0	0	0	0	0	0	0	0	0	0	0	0	0	0	0	0	0	0	0	0	0	0	0	0	0	0	0	0	5	0	6	0	0	0	0	0	11	0	0	0	0	0	0	0	0	0
0f2a9843095c1ad7fd018c19daf54a9b	0	0	0	0	0	0	0	0	0	0	0	0	0	0	0	0	0	0	0	0	0	0	0	0	0	0	0	0	0	0	0	0	0	0	0	0	0	0	0	0	0	0	0	0	0	0	0	0	0
8112e766c5334bceaed2f4b6752a5f1f	0	0	0	0	0	0	0	0	0	0	0	0	0	0	0	0	0	0	0	0	0	0	0	0	0	0	0	0	0	0	0	0	0	0	0	0	0	0	0	0	9	0	0	0	0	0	0	0	0
952d8802fe9e10079638e2540e44b0bf	0	0	0	0	0	0	0	0	0	0	0	0	0	0	0	0	0	0	0	0	0	0	0	0	0	0	0	0	0	0	0	0	0	0	0	0	0	0	0	0	0	0	0	0	0	8	0	0	0
d891ff4b994121d09b8d99fe3b2dd981	0	0	0	0	22	10	0	0	17	49	0	0	0	0	3	7	0	0	0	10	0	0	0	0	0	0	0	0	0	0	0	0	0	0	0	0	0	0	0	0	0	0	0	0	0	0	0	0	0
8fb053805c55fb1d3cc8c8e305cf7ad7	0	0	0	0	0	0	0	0	0	0	0	0	0	0	0	0	0	0	0	0	0	0	0	0	0	0	0	0	0	0	0	0	0	0	0	0	0	0	0	0	0	0	0	0	0	0	0	0	0
7c135ee67fba0b7faf7657eecb640f68	0	0	0	0	0	0	0	0	0	0	0	0	0	0	0	0	0	0	0	0	0	0	0	0	0	0	0	0	0	0	0	0	0	0	0	0	0	0	0	0	0	0	0	0	0	0	0	0	0
4ab0e3187d86091324ffe965ebf1a07f	0	0	0	0	0	0	0	0	0	0	0	0	0	4	0	10	0	0	0	14	0	0	0	0	0	0	0	0	0	0	0	0	0	0	10	0	0	0	0	10	0	0	0	0	0	0	0	0	0
5523befe41c506882bc07e13c68626c4	0	0	0	0	18	0	0	0	0	18	0	0	0	0	0	0	0	0	0	0	0	0	0	0	0	0	0	0	0	0	2	0	0	0	0	0	0	0	0	2	0	0	0	0	0	0	0	0	0
b7df8b79761edeb6236993d459e38b0a	0	0	0	0	0	0	0	0	0	0	0	0	0	0	0	0	0	0	0	0	0	0	0	0	0	0	0	0	0	0	0	0	0	0	0	0	0	0	0	0	0	0	0	0	0	0	0	0	0
8d8075b099617b4a30c2508f1b2b8ab1	0	0	0	0	0	0	0	0	0	0	0	0	0	0	0	0	0	0	0	0	0	0	0	0	0	0	0	0	0	0	0	0	0	0	0	0	0	0	0	0	0	0	0	0	0	0	0	0	0
3ad7dc100cd72dad605c581e90ccd7fc	0	0	0	0	0	0	0	0	0	0	0	0	0	0	0	0	0	0	0	0	0	0	0	0	0	0	0	0	0	0	0	0	0	0	0	0	0	0	0	0	0	0	0	0	0	0	0	0	0
f3e34c2319fb87ecec0ca8669f23cb03	0	0	0	0	0	0	0	0	0	0	0	0	0	0	0	0	0	0	0	0	0	0	0	0	0	0	0	0	0	0	0	0	0	0	0	0	0	0	0	0	0	0	0	0	0	0	0	0	0
ed0d37da52db533133927765d06c8a5d	15	0	0	0	0	0	0	0	0	15	0	0	0	0	0	0	0	25	0	25	0	0	0	0	0	0	0	0	0	0	0	0	0	0	0	0	0	0	0	0	0	0	0	0	0	6	0	0	0
a31f6899a9851bfe725d1e9c729a659e	0	0	0	0	15	0	5	0	14	34	0	0	0	0	9	0	0	0	13	22	0	0	0	0	0	0	0	0	0	0	0	0	0	0	0	0	0	0	0	0	0	0	0	0	0	0	0	0	0
b7d5ec47b927396c0ae6d5e5ce1e0a9f	0	0	0	0	0	0	5	0	11	16	0	0	0	0	0	0	0	0	0	0	0	0	0	0	0	0	0	0	0	0	0	0	0	0	0	0	0	0	0	0	0	0	0	0	0	0	0	0	0
753b3a6b23667ddd561dfc6b64501b89	0	0	6	0	0	0	0	0	0	6	0	6	0	0	0	0	0	0	0	6	0	0	0	0	0	6	0	0	0	6	0	0	3	0	0	0	0	0	0	3	0	0	0	0	0	0	0	0	0
61396fb809c28c07655e63a8d21b9c10	0	0	0	3	9	0	0	0	0	12	0	0	0	0	0	0	9	0	0	9	4	0	0	0	0	0	0	0	0	4	0	0	0	0	0	0	0	0	0	0	0	0	0	0	0	0	0	0	0
88843c4c005f8ef35a550e49c957ed07	0	0	0	0	0	0	0	0	0	0	0	0	0	0	0	0	0	0	0	0	0	0	0	0	0	0	0	0	0	0	0	0	0	0	0	0	0	0	0	0	0	0	0	0	0	0	0	0	0
5f37f5a23e9e62c5b94a625dfaa81f3c	0	0	0	0	0	0	0	0	0	0	0	0	0	0	0	0	0	0	0	0	0	0	0	0	0	0	0	0	0	0	0	0	0	0	0	0	0	0	0	0	0	0	0	0	0	0	0	0	0
1f242da1e6c53a5f6df451a7995d89d5	0	0	0	0	0	0	0	0	0	0	0	0	0	0	0	0	0	0	0	0	0	0	0	0	0	0	0	0	0	0	0	0	0	0	0	0	0	0	0	0	0	0	0	0	0	0	0	0	0
0013b3516352ab382771f135f7f75b77	0	0	0	0	0	0	0	0	0	0	0	0	0	0	0	0	0	0	0	0	0	0	0	0	0	0	0	0	0	0	0	0	0	0	0	0	0	0	0	0	0	0	0	0	0	0	0	0	0
bc45bb6c0c1aa0bdc16146f5b23afa53	0	0	0	0	0	0	0	0	0	0	0	0	0	0	0	0	0	0	0	0	0	0	0	0	0	0	0	0	0	0	0	0	0	0	0	0	0	0	0	0	0	0	0	0	0	0	0	0	0
9dc9d9794aa3dd4dadcfb8f02ded456c	0	0	0	0	0	0	0	0	0	0	0	0	0	0	0	0	0	0	0	0	0	0	0	0	0	0	0	0	0	0	0	0	0	0	0	0	0	0	0	0	0	0	0	0	0	0	0	0	0
873c5839b6de644045faea0b8c6a238b	26	0	0	0	0	0	22	0	0	48	0	0	0	0	0	0	0	0	0	0	0	0	0	0	0	0	0	0	0	0	0	0	0	0	0	0	0	0	0	0	0	0	0	0	0	0	0	0	0
5857748ec8653c68e8b92704320026d8	0	0	0	0	0	0	0	0	0	0	0	0	0	0	0	0	0	0	0	0	0	9	0	0	0	0	0	0	0	9	0	0	0	0	0	0	0	0	0	0	0	0	0	0	0	0	0	0	0
e367fc2f94175320daccfe1247a8b877	0	0	0	0	23	0	14	0	17	54	0	0	0	0	0	0	0	0	0	0	0	0	0	0	15	0	0	12	0	27	0	0	0	0	0	0	0	0	0	0	0	0	0	0	0	0	0	0	0
3f8cd1740e8b1aee28e5825260f1bba3	0	0	0	0	0	0	0	0	0	0	0	0	0	0	0	0	0	0	0	0	0	0	0	0	0	0	0	0	0	0	0	0	0	0	0	0	0	0	0	0	0	0	0	0	0	0	0	0	0
804cfec7ccd972349399ace3446070d2	0	0	0	0	0	0	0	0	0	0	0	0	0	0	0	0	0	0	0	0	0	0	0	0	0	0	0	0	0	0	0	0	0	0	0	0	0	0	0	0	0	0	0	0	0	0	0	0	0
66c0b33384b02c3e08df4f10af1d193f	0	0	0	0	0	0	0	0	0	0	0	0	0	0	0	0	0	0	0	0	0	0	0	0	0	0	0	0	0	0	0	0	0	0	0	0	0	0	0	0	0	0	0	0	0	0	0	0	0
5488e7cf68139ccd6245128a85321d26	0	0	0	0	0	0	0	0	0	0	0	0	0	0	0	0	0	0	0	0	0	0	0	0	0	0	0	0	0	0	0	0	0	0	0	0	0	0	0	0	0	0	0	0	0	0	0	0	0
1ad5f24792ca74f8fc7cda30d43c5d88	0	0	0	0	0	0	0	0	0	0	0	0	0	0	0	0	0	0	0	0	0	0	0	0	0	0	0	0	0	0	0	0	0	0	0	0	0	0	0	0	6	0	0	0	0	0	0	0	0
a1693d37cbf2a30e3856300dbab5b9ba	0	0	0	0	0	0	0	0	0	0	0	0	0	0	0	0	0	0	0	0	0	0	0	0	0	0	0	0	0	0	0	0	0	0	0	0	0	0	0	0	0	0	0	0	0	0	0	0	0
d4fa689c0543686e20a04664b2e5a529	0	0	0	0	0	0	0	0	0	0	0	0	0	0	0	9	0	0	0	9	0	0	0	0	0	0	0	0	0	0	0	0	0	0	0	0	0	0	0	0	0	0	0	0	0	0	0	0	0
d79796beb31e70a3fee87f76705a5a84	0	0	0	0	0	0	0	0	0	0	0	0	0	0	0	0	0	0	0	0	0	0	0	0	0	0	0	0	0	0	0	0	80	0	0	0	0	0	0	80	0	0	0	0	0	0	0	0	0
51f65243ef1b9b3fd543e1fa3802e203	0	0	0	0	0	0	0	0	0	0	0	0	0	0	0	0	0	0	0	0	0	0	13	0	0	0	0	0	0	13	0	0	0	10	0	0	0	0	0	10	0	0	0	0	0	0	0	0	0
e2e83a157da5c6c302f88615b9f03a87	0	0	0	0	0	0	0	0	0	0	0	0	0	0	0	0	0	0	0	0	0	0	0	0	0	0	0	0	0	0	0	0	0	0	0	0	0	0	0	0	0	0	0	0	0	0	0	0	0
aa935680e6cebb10fe00aa76de40e3b4	0	0	0	0	0	0	0	0	0	0	0	0	0	0	0	0	0	0	0	0	0	0	0	0	0	0	0	0	0	0	0	0	0	0	0	0	0	0	0	0	0	0	0	0	0	0	0	0	0
8a95a6c8bf10960c653339c132a134ca	0	0	0	0	0	0	0	0	0	0	0	0	0	0	0	0	0	0	0	0	0	0	0	0	0	0	0	0	0	0	0	0	0	0	0	0	0	0	0	0	0	0	0	0	0	0	0	0	0
84314b8cab25069f99a7bef587f15624	0	0	0	0	0	0	0	0	0	0	0	0	0	0	0	0	0	0	0	0	0	0	0	0	0	0	0	0	0	0	0	0	0	0	0	0	0	0	0	0	0	0	0	0	0	0	0	0	0
e4cc6d15a61b51857f614e41b93d0e5f	0	0	0	0	0	0	0	0	0	0	0	0	0	0	0	0	0	0	0	0	0	0	0	0	0	0	0	0	0	0	0	0	0	0	0	0	0	0	0	0	0	0	0	0	0	0	0	0	0
976b62f1b5d04dc5cbc393b4a2263b94	0	0	0	0	0	0	0	0	0	0	0	0	0	0	0	0	0	0	0	0	0	0	0	0	0	0	0	0	0	0	0	0	0	0	0	0	0	0	0	0	0	0	0	0	0	0	0	0	0
60489499c3458fd428e28e032e03304f	0	0	0	0	0	0	0	0	0	0	0	0	0	0	0	0	0	0	0	0	0	0	0	0	0	0	0	0	0	0	16	0	0	0	0	0	0	0	0	16	0	0	0	0	0	0	0	0	0
3b2944c1bdecad2f13ace7f0274e27f7	0	0	0	0	0	0	0	0	0	0	0	0	0	0	0	0	0	0	0	0	0	0	0	0	0	0	0	0	0	0	0	0	0	0	0	0	0	0	0	0	0	0	0	0	0	0	0	0	0
80deb25116ce68e27039b827d83c0947	0	0	0	0	0	0	0	0	0	0	0	0	0	0	0	0	0	0	0	0	0	0	0	0	0	0	0	0	0	0	0	0	0	0	0	0	0	0	0	0	0	0	0	0	0	0	0	0	0
8e626771aabf581c2b5ca8baad9828e8	0	0	0	0	0	0	0	0	0	0	0	0	0	0	0	0	0	0	0	0	0	0	0	0	0	0	0	0	0	0	0	0	0	0	0	0	0	0	0	0	0	0	0	0	0	0	0	0	0
2778c60449dc1931b804e0acf2aa4d61	0	0	0	0	0	0	0	0	0	0	0	0	0	0	0	0	0	0	0	0	0	0	0	0	0	0	0	0	0	0	0	0	0	0	0	0	0	0	0	0	0	0	0	0	0	0	0	0	0
5e5d0657d99716dd49e0487abcf220cd	0	0	0	0	0	0	0	0	0	0	0	0	0	0	0	0	0	0	0	0	0	0	0	0	0	0	0	0	0	0	0	0	0	0	0	0	0	0	0	0	0	0	0	0	0	0	0	0	0
627a7abdf800e6f08bd27b9b35f3c2eb	0	0	0	0	0	0	0	0	0	0	0	0	0	0	0	0	0	0	0	0	0	0	0	0	0	0	0	0	0	0	0	0	0	0	0	0	0	0	0	0	0	0	0	0	0	0	0	0	0
035c9cdc4777e91f2a5c0879caca516c	0	0	0	0	0	0	0	0	0	0	0	0	0	0	0	78	0	0	0	78	0	0	0	0	0	0	0	0	0	0	0	0	0	0	0	0	0	0	0	0	0	0	0	0	0	0	0	0	0
9422cb40363f67c0a7a202ec08fd91fa	0	0	0	0	0	0	0	0	0	0	0	0	0	0	0	7	0	0	0	7	0	0	0	0	0	0	0	0	0	0	0	0	0	0	0	0	0	0	0	0	0	0	0	0	0	0	0	0	0
40272e53964250376370119b41b700db	0	0	0	0	0	0	0	0	0	0	0	0	0	0	0	0	0	0	0	0	0	0	0	0	0	0	0	0	0	0	0	0	0	0	0	0	0	0	0	0	0	0	0	0	0	0	0	0	0
b6201c2fe248d3b8c548e349c8632e53	0	0	0	0	0	0	0	0	0	0	0	0	0	0	0	0	0	0	0	0	0	0	0	0	0	0	0	0	0	0	0	0	0	0	0	0	0	0	0	0	0	0	0	0	0	0	0	0	0
010a4d7ea7531fae12ae5bccaa89823e	0	0	0	0	0	0	5	0	0	5	0	0	0	0	0	0	0	0	0	0	0	0	0	0	0	0	0	0	0	0	0	0	0	0	0	0	0	0	0	0	0	0	0	0	0	0	0	0	0
391f8d3d59b6527acb3ae77401c34da2	0	0	0	0	0	0	0	0	0	0	0	0	0	0	0	0	0	0	0	0	0	0	0	0	0	0	0	0	0	0	0	0	0	0	0	0	0	0	0	0	0	0	0	0	0	0	0	0	0
edd65b5da814ade4b48d06740c3692fc	0	0	0	0	0	0	0	0	0	0	0	0	0	0	0	0	0	0	0	0	0	0	0	0	0	0	0	0	0	0	0	0	0	0	0	6	0	0	7	13	0	0	0	0	0	0	0	0	0
f24c2620a24a2c47fa47ee4b6bbec8b6	0	15	0	0	0	0	0	0	0	15	0	0	0	0	0	0	0	0	0	0	0	6	0	0	0	0	0	0	0	6	0	0	0	0	0	0	0	0	0	0	0	0	0	0	0	0	0	0	0
77e2a592a2faa1a0a47ef98fbe707903	0	0	0	0	28	0	11	0	12	51	0	0	0	0	0	0	0	0	0	0	0	0	0	0	16	0	0	10	0	26	0	0	0	0	0	0	0	0	0	0	0	0	0	0	0	0	0	0	0
70c4ff77bd4a0b68033fd666139c12cf	0	0	0	0	0	0	0	0	0	0	0	0	0	0	0	0	0	0	0	0	0	0	0	0	0	0	0	0	0	0	0	0	0	0	0	0	0	0	0	0	0	0	0	0	0	0	0	0	0
d75097f6bda27c08cf349c792a311bec	0	0	0	0	0	0	0	0	0	0	0	0	0	0	0	0	0	0	0	0	0	0	0	0	0	0	0	0	0	0	0	0	0	0	0	0	0	0	0	0	0	0	0	0	0	0	0	0	0
403b0a9d11a821a30d81a4e1cfc52385	0	0	0	0	0	0	0	0	0	0	0	0	0	0	0	0	0	0	0	0	0	0	0	0	0	0	0	0	0	0	0	0	0	0	0	0	0	0	0	0	0	0	0	0	0	0	0	0	0
275e3afe4b3e28878b4b15722786cd67	0	0	0	0	0	0	0	0	0	0	0	0	0	0	0	0	0	0	0	0	0	0	0	0	0	0	0	0	0	0	0	0	0	0	0	0	0	0	0	0	0	0	0	0	0	0	0	0	0
dbce5f9ee7f587b988a0509af47bf6ae	0	0	0	0	0	0	0	0	0	0	0	0	0	0	0	0	0	0	0	0	0	0	0	0	0	0	0	0	0	0	0	0	0	0	0	0	0	0	0	0	0	0	0	0	0	0	0	0	0
a7e99dc227a19a61049e527d00dee271	0	0	0	0	0	0	0	0	0	0	0	0	0	0	0	0	0	0	0	0	0	0	0	0	0	0	0	0	0	0	0	0	0	0	0	0	0	0	0	0	0	0	0	0	0	0	0	0	0
eedcf8f593f7295d17aec4501ad9296a	0	0	11	0	0	0	0	0	0	11	15	0	0	0	0	0	0	0	0	15	0	0	0	0	0	0	0	0	0	0	0	0	6	0	0	0	0	0	0	6	0	0	0	0	0	0	0	0	0
88962247294855307c89ba38efb9b9ec	0	0	0	0	0	0	0	0	0	0	0	0	0	0	0	0	0	0	0	0	0	0	0	0	0	0	0	0	0	0	0	0	0	0	0	0	0	0	0	0	0	0	0	0	0	30	0	0	0
add1d0ddac7ac90183cc81d4b154a81c	0	0	0	0	0	0	0	0	0	0	0	0	0	0	0	0	0	0	0	0	0	0	0	0	0	0	0	0	0	0	0	0	0	0	0	0	0	0	0	0	0	0	0	0	0	0	0	0	0
e64b1b69b184d86d008ac9d41535f6f1	0	0	0	0	0	0	0	0	0	0	0	0	0	0	0	0	0	0	0	0	0	0	0	48	0	0	0	0	0	48	0	28	0	0	0	0	0	0	0	28	0	0	0	0	0	0	0	0	0
29b592528ad814098ca85c0855e1d1f7	0	0	0	0	0	0	0	0	0	0	0	0	0	0	0	0	0	0	0	0	0	0	0	0	0	0	0	0	0	0	0	0	0	0	0	0	0	0	0	0	0	0	0	0	0	0	0	0	0
15dc133828628cbf15291cc4e0c4dd75	0	0	0	0	0	0	0	0	0	0	0	0	0	0	0	0	0	0	0	0	0	0	0	0	0	0	0	0	0	0	0	0	0	0	0	0	0	0	0	0	0	0	0	0	0	0	0	0	0
ed3d275c9cd3d84f1737640a7b714025	0	0	0	0	0	0	0	0	0	0	0	0	0	0	0	0	0	0	0	0	0	0	0	0	0	0	0	0	0	0	0	0	0	0	0	0	0	0	0	0	0	0	0	0	0	0	0	0	0
ef357fb07881ce17b13549b60791f06d	0	0	0	0	0	0	0	0	0	0	0	0	0	0	0	0	0	0	0	0	0	0	0	0	0	0	0	0	0	0	0	0	0	0	0	0	0	0	0	0	0	0	0	0	0	0	0	0	0
966a419c70c7c9e6d2f4c75ab986ec8d	0	0	0	0	0	0	0	0	0	0	0	0	0	0	0	0	0	0	0	0	0	0	0	0	14	0	0	0	0	14	0	0	0	0	0	0	0	0	0	0	0	0	0	0	0	0	0	0	0
e932ceb0f1a037e13721770d8edc5bb2	0	0	0	0	0	0	0	0	0	0	0	0	0	0	0	0	0	0	0	0	0	0	0	0	0	0	0	0	0	0	0	0	0	0	0	0	23	0	0	23	0	0	0	0	0	0	0	0	0
b622c558d5216a0417747855bf9c6c3a	0	0	0	0	0	0	0	0	0	0	0	0	0	0	0	0	0	0	0	0	0	0	0	0	0	0	0	0	0	0	0	0	0	0	0	0	0	0	0	0	0	0	0	0	0	0	0	0	0
5dd0f680633a715d7ca27ba7934ab615	0	0	0	0	0	0	0	0	0	0	0	0	0	0	0	0	0	0	0	0	0	0	0	0	0	0	0	0	0	0	0	0	0	0	0	0	0	0	0	0	0	0	0	0	0	0	0	0	0
0999cbc3094b6e56f3a9caa38c0cdfb2	0	0	0	0	0	0	0	0	0	0	0	0	0	0	0	0	0	0	0	0	0	0	0	0	0	0	0	0	0	0	0	0	0	0	0	0	0	0	0	0	0	0	0	0	0	0	0	0	0
ef1744eea60143121ddeb886e99f19fb	0	0	0	0	0	0	0	0	0	0	0	0	0	0	0	0	0	0	0	0	0	0	0	0	0	0	0	0	0	0	0	0	0	0	0	0	0	0	0	0	0	0	0	0	0	0	0	0	0
92347ca4488fcae3be4a91235d717167	0	0	0	0	0	0	0	0	0	0	0	0	0	0	0	0	0	0	0	0	0	0	0	0	0	0	0	0	0	0	0	0	0	0	0	0	0	0	0	0	0	0	0	0	0	0	0	0	0
c2c66437f9bfe561ef155f0d47ea7ad9	0	0	0	0	0	0	0	0	0	0	0	0	0	0	0	0	0	0	0	0	0	0	0	0	0	0	0	0	0	0	0	0	0	0	0	0	0	0	0	0	0	0	0	0	0	0	0	0	0
04fcddbdf73a515323930ac1ca63f3b9	0	0	0	0	0	0	0	0	0	0	2	0	0	0	0	0	0	0	0	2	0	0	0	0	0	0	0	0	0	0	0	0	0	0	0	0	0	0	0	0	0	2	0	0	0	0	0	0	0
6e017233230b4466160059c699b56657	0	0	0	0	0	0	0	0	0	0	0	0	0	0	0	0	0	0	0	0	0	0	0	0	0	0	0	0	0	0	0	0	0	0	0	0	0	0	0	0	0	0	0	0	0	0	0	0	0
8d9bcfdd43c6e1f1c826e221e936baad	0	0	0	0	0	0	0	0	0	0	0	0	0	0	0	0	0	0	0	0	0	0	0	0	0	0	0	0	0	0	0	0	0	0	0	0	0	0	0	0	0	0	0	0	0	0	0	0	0
39cc4455c50955bdcf73efcbe5f1c0cc	0	0	0	0	0	0	0	0	0	0	0	0	0	34	0	0	0	0	0	34	0	0	0	0	0	0	0	0	0	0	0	0	0	0	0	0	0	0	0	0	0	0	0	0	0	0	0	0	0
ed47d5b7c4b6e8b34cb6399c54fe524e	0	0	0	0	0	0	0	0	0	0	0	0	0	0	0	0	0	0	0	0	0	0	0	0	0	0	0	0	0	0	0	0	0	0	0	0	20	0	0	20	0	0	0	0	0	0	0	0	0
3c9989763baf7db1bc67f667890388c0	0	0	0	0	0	0	0	0	0	0	0	0	0	0	0	0	0	0	0	0	0	0	0	0	0	0	0	0	0	0	0	0	0	0	0	0	0	0	0	0	0	0	0	0	0	0	0	0	0
8ca7feeca649345be010e6d3937326df	0	0	0	0	0	0	0	0	0	0	0	0	0	0	0	0	0	0	0	0	0	0	0	0	0	0	0	0	0	0	0	0	0	0	0	0	0	0	0	0	0	0	0	0	0	0	0	0	0
6de20a35153eb450da2a5672bfa5e242	0	0	0	0	0	0	0	0	0	0	0	0	0	0	0	0	0	0	0	0	0	0	0	0	0	0	0	0	0	0	0	0	0	0	0	0	0	0	0	0	0	0	0	0	0	0	0	0	0
c7ba47a7f7361165a7d28edb8bbde890	0	0	0	0	0	0	0	0	0	0	0	0	0	0	0	0	0	0	0	0	0	0	0	0	0	0	0	0	0	0	0	0	0	0	0	0	0	0	0	0	0	0	0	0	0	0	0	0	0
5cd7e483601a05295a2c1733f997b85d	0	0	0	0	0	0	0	0	0	0	0	0	0	0	0	0	0	0	0	0	0	0	0	0	0	0	0	0	0	0	0	0	0	0	0	0	0	0	0	0	0	0	0	0	0	0	0	0	0
2c8f957fef286b39310b25f2689340f0	0	0	0	0	0	0	0	0	0	0	0	0	0	0	0	0	0	0	0	0	0	0	0	0	0	0	0	0	0	0	0	0	0	0	0	0	0	0	0	0	0	0	0	0	0	0	0	0	0
f3c0f0a5c3a03cf24a075ef80948dff2	0	0	0	0	0	0	0	0	0	0	0	0	0	0	0	0	0	0	0	0	0	0	0	0	0	0	0	0	0	0	0	0	0	0	0	0	0	0	0	0	0	0	0	0	0	0	0	0	0
fbbc597995c5fc604bbf326c25dd17a9	0	0	0	0	0	0	0	0	0	0	0	34	0	0	0	0	0	0	0	34	0	0	0	0	0	0	0	0	0	0	0	0	0	0	0	0	0	0	0	0	0	0	0	0	0	0	0	0	0
251735821965cdc3de62c7a2b5a7f4ba	0	0	0	0	0	0	0	0	0	0	0	0	0	0	0	0	0	0	0	0	0	0	0	0	0	0	0	0	0	0	0	0	0	0	0	0	0	0	0	0	0	0	0	0	0	0	0	0	0
2e754d18414a817012ea6ec7042d51b2	0	0	0	0	0	0	0	0	0	0	0	0	0	0	0	0	0	0	0	0	0	0	0	0	0	0	0	0	0	0	0	0	0	0	0	0	0	0	0	0	0	0	0	0	0	0	0	0	0
8fa229eb6f0e7ce00487899f8dcaf1dd	0	0	0	0	0	0	0	0	0	0	0	0	0	0	0	0	0	0	0	0	0	0	0	0	0	0	0	0	0	0	0	0	0	0	0	0	0	0	0	0	0	0	0	0	0	0	0	0	0
e25e1afb78e3ac662486f1f63f53d162	0	0	0	0	0	0	0	0	0	0	0	0	26	0	0	0	0	0	0	26	0	0	0	0	0	0	0	0	0	0	0	0	0	0	0	0	0	0	0	0	0	0	0	0	0	0	0	0	0
7dc1176f682d5e1399fd975cf66d2e36	0	0	0	0	0	0	0	0	0	0	0	0	0	0	0	0	0	0	0	0	0	0	0	0	0	0	0	0	0	0	0	0	0	0	0	0	0	0	0	0	0	0	0	0	0	0	0	0	0
d63db38d8f02251868a67e5e802a134c	0	0	0	0	0	0	0	0	0	0	10	0	0	0	0	0	0	0	0	10	0	0	0	0	0	0	0	0	0	0	30	0	0	0	0	0	0	0	0	30	0	0	0	0	0	0	0	0	0
34c8d72b23bf2c2f37c06209e2f53844	0	0	0	0	0	0	0	0	0	0	0	0	0	0	0	0	0	0	0	0	0	0	11	0	0	0	0	0	0	11	0	0	0	0	0	0	0	0	0	0	0	0	0	0	0	0	0	0	0
e0af3ae2e8567265990ce1c9e64c1d06	0	0	0	0	0	0	0	0	0	0	0	0	0	0	0	0	0	0	0	0	0	3	0	6	0	0	0	0	0	9	0	0	0	0	5	0	0	0	0	5	0	0	0	0	0	0	0	0	0
924e8add371bba07c95dfb8ee8f3a4c9	0	0	0	0	0	0	0	0	0	0	0	0	0	0	0	0	0	0	0	0	0	0	0	0	0	0	0	0	0	0	0	0	0	0	0	72	0	0	0	72	0	0	0	0	0	0	0	0	0
795343c11fca69ff11ce07e90f5fb374	0	0	0	0	0	0	0	0	0	0	0	0	0	0	0	0	0	0	0	0	0	0	0	0	0	0	0	0	0	0	0	0	0	0	0	0	0	0	0	0	0	0	0	0	0	0	0	0	0
14004875ee7660ad8a4ce72d2907a8c6	0	0	0	0	0	0	0	0	0	0	0	0	0	0	0	0	0	0	0	0	0	0	0	0	0	0	0	0	0	0	0	0	0	0	0	0	0	0	0	0	0	0	0	0	0	0	0	0	0
80a3df3dced3c7657c2ca09a2bc88b06	0	0	0	0	0	0	0	0	0	0	0	0	0	0	0	0	0	0	0	0	0	0	0	0	0	0	0	0	0	0	0	0	0	0	0	0	0	0	0	0	0	0	0	0	0	0	0	0	0
7c3918144bbbaa2210c7d75e541da263	0	0	0	0	0	0	0	0	0	0	0	0	0	0	0	0	0	0	0	0	0	0	0	0	0	0	0	0	0	0	0	0	0	0	0	0	0	0	0	0	0	0	0	0	0	0	0	0	0
ad2b847ca8909783474ea818cb3f5c08	0	0	0	0	0	0	0	0	0	0	0	0	0	0	0	0	0	0	0	0	0	0	0	0	0	0	0	0	0	0	0	0	0	0	0	0	0	0	0	0	0	0	0	0	0	0	0	0	0
682bc00d8fde7fd8791faeb56ec29c93	0	0	0	0	0	0	0	0	0	0	0	0	0	0	0	0	0	0	0	0	0	0	0	0	0	0	0	0	0	0	0	0	0	0	0	0	0	0	0	0	0	0	0	0	0	0	0	0	0
474555cd2fc9f28f8e9fc1b63ca22aca	0	0	0	0	0	0	0	0	0	0	0	0	0	0	0	0	0	0	0	0	0	0	0	0	0	0	0	0	0	0	0	0	0	0	0	0	0	0	0	0	0	0	0	0	0	0	0	0	0
b30ade31590151d420d99fd943849d88	0	0	0	0	0	0	0	0	0	0	0	0	0	0	0	0	0	0	0	0	0	0	0	0	0	0	0	0	0	0	0	0	0	0	0	0	0	0	0	0	0	0	0	0	0	0	0	0	0
7736bd4cb854d5e83ce39c8c5e4fea05	0	0	0	0	0	0	0	0	0	0	0	0	0	0	0	0	0	0	0	0	0	0	0	0	0	0	0	0	0	0	0	0	0	0	0	0	0	0	0	0	0	0	0	0	0	0	0	0	0
f8b7f605f1dfa3b944df11dc91e1e8be	0	16	0	0	0	0	0	0	0	16	0	0	0	0	0	0	0	0	0	0	0	0	0	6	0	0	0	0	0	6	0	0	0	0	0	0	0	0	0	0	12	0	0	0	0	0	9	0	0
2bf89781e456ed06b5d6d159333f1b19	0	0	0	0	0	0	0	0	0	0	0	0	0	0	0	0	0	0	0	0	0	0	0	0	0	0	0	0	0	0	0	0	0	0	0	0	12	0	0	12	0	0	0	0	0	0	0	0	0
eca866cec6d53fdc9f0399bf86b56296	0	0	0	0	0	0	4	0	0	4	0	0	0	0	0	0	0	0	0	0	0	0	0	0	0	0	0	0	0	0	0	0	0	0	0	0	0	0	0	0	0	0	0	0	0	0	0	0	0
64e9adc2fce78cd355bd4a33bb90faeb	0	0	0	0	0	0	0	0	0	0	0	0	0	0	0	0	0	0	0	0	0	0	0	0	0	0	0	0	0	0	0	0	0	0	0	0	0	0	0	0	0	0	0	0	0	0	0	0	0
adbfbe780eeb8d34b01284911f909829	0	0	0	0	0	0	0	0	0	0	0	0	0	0	0	0	0	0	0	0	0	0	0	0	0	0	0	0	0	0	0	0	0	8	0	0	0	0	0	8	0	0	0	0	0	0	0	0	0
2d44814ba87d8e61b928ed6549926cc9	0	0	0	0	0	0	0	0	0	0	0	0	0	0	0	0	0	0	0	0	0	0	0	0	0	0	0	0	0	0	0	0	0	0	0	0	0	0	0	0	0	0	0	0	0	0	0	0	0
c6ffda2b3b27ae421a55e3ee4939751a	0	0	0	0	0	0	0	0	0	0	0	0	0	0	0	0	0	0	0	0	0	0	0	0	0	0	0	0	0	0	0	0	0	0	0	0	0	0	0	0	0	0	0	0	0	0	0	0	0
4d8f0c652dc249c81391655f5323ee34	0	0	0	0	0	27	0	0	0	27	13	0	0	0	0	0	0	0	0	13	0	0	0	0	0	0	0	0	0	0	0	0	0	0	0	0	0	0	0	0	0	0	0	0	0	0	0	0	0
bcf82c6310c9a3fb94c502fa2f46fed6	0	0	0	0	0	0	0	0	0	0	0	0	0	0	0	0	5	0	0	5	0	0	0	0	0	0	0	0	0	0	0	0	0	0	0	0	0	0	0	0	0	0	0	0	0	0	0	0	0
1d9b131b968eb5d22cb810f3236a9ab5	0	0	0	0	0	0	0	0	0	0	0	0	0	0	0	6	0	0	0	6	0	0	0	0	0	0	0	0	0	0	0	0	0	3	0	0	0	0	0	3	0	0	0	0	0	0	0	0	0
4ceb4d77aefafdbc816fe24588da6f97	0	0	0	0	0	0	0	0	0	0	0	0	0	0	0	0	0	0	0	0	0	0	0	0	16	0	0	0	0	16	0	0	0	0	0	0	0	0	0	0	0	0	0	0	0	0	0	0	0
43ad06a7c47672e6ee411ac8e9fe62ca	0	0	0	0	7	0	0	0	0	7	0	0	0	0	0	0	0	0	0	0	0	0	0	0	0	0	0	0	0	0	0	0	0	0	0	0	0	0	0	0	0	0	0	0	0	0	0	0	0
a5a314318705652f6d672367630e7289	0	0	0	0	0	0	0	0	0	0	0	0	0	0	0	0	0	0	0	0	0	0	0	0	0	0	0	0	0	0	0	0	0	0	0	0	0	0	0	0	0	0	0	0	0	0	0	0	0
6374c1920535ce600bdc18885c9ba48b	0	0	0	0	0	0	0	0	0	0	0	0	0	0	0	0	0	0	0	0	0	0	0	0	0	0	0	0	0	0	0	0	0	0	0	0	0	0	0	0	0	0	0	0	0	0	0	0	0
aef303a968761d4f29bf8908a27d968d	0	0	0	0	0	0	0	0	0	0	0	0	0	0	0	0	0	0	0	0	0	0	0	0	0	0	0	0	0	0	0	0	0	0	0	0	0	0	0	0	0	0	0	0	0	0	0	0	0
1dd3ee1533ed867c3fac1bd5a9956110	0	0	0	0	0	0	0	0	0	0	0	0	0	0	0	0	0	0	0	0	0	0	0	0	0	0	0	0	0	0	0	0	0	0	0	0	0	0	0	0	0	0	0	0	0	0	0	0	0
16d19c209d567d7416505806de7d5b3a	0	0	0	0	0	0	0	0	0	0	0	0	0	0	0	0	0	0	0	0	0	0	0	0	0	0	0	0	0	0	0	0	0	0	0	0	0	0	0	0	0	0	0	0	0	0	0	0	0
160f8611055ac5e419c880fda906d661	0	0	0	0	0	0	0	0	0	0	0	0	21	0	0	0	0	0	0	21	0	0	0	0	0	0	0	0	0	0	12	0	0	0	0	0	0	0	0	12	0	0	0	0	0	0	0	0	0
41ffa6ec5598c9344f7edf72a3ecf308	0	0	0	0	0	0	0	0	30	30	0	0	0	0	0	0	0	0	0	0	0	0	0	0	0	0	0	0	0	0	0	0	0	0	0	0	0	0	0	0	0	0	0	0	0	0	0	0	0
475b158aebb82c0a3b8778ef5f8b25a6	0	0	0	0	0	0	0	0	0	0	0	0	0	0	0	0	0	0	0	0	0	0	0	0	0	0	0	0	0	0	0	0	0	0	0	0	0	0	0	0	0	0	0	0	0	0	0	0	0
9ef078a9151cadf9b9c37b0414c7d1f6	0	0	0	0	0	0	0	0	0	0	0	0	0	0	0	0	0	0	0	0	0	0	0	0	0	0	0	0	0	0	0	0	0	0	0	0	0	0	0	0	0	0	0	0	0	0	0	0	0
14a53050dee0ac64f6fa3ca2ce4e8e86	0	0	0	0	0	0	0	0	0	0	0	0	0	0	0	0	0	0	0	0	0	0	0	0	0	0	0	0	0	0	0	0	0	0	0	0	0	0	0	0	0	0	0	0	0	0	0	0	0
785bfa080a56e97072006431838aab8b	0	0	0	0	0	0	0	0	0	0	0	0	0	0	0	0	0	0	0	0	0	0	0	0	0	0	0	0	0	0	0	0	0	0	0	0	0	0	0	0	0	0	0	0	0	0	0	0	0
afef4d21e46fb69861b4c96be0a85499	0	0	0	0	0	0	0	0	0	0	0	0	0	0	0	0	3	0	0	3	0	0	0	0	0	0	0	0	0	0	0	0	0	0	0	0	0	0	0	0	0	0	0	13	0	0	10	0	0
7d67a2a63150e720aa986b66e47882bd	0	0	0	0	0	0	26	0	9	35	0	0	9	0	0	0	0	0	0	9	0	0	0	0	0	0	0	0	0	0	0	0	0	0	0	0	0	0	0	0	0	0	0	0	0	0	0	0	0
7dd964e4840b5750cc681d841416fa5a	0	0	0	0	0	0	0	0	0	0	0	0	0	0	0	0	0	0	0	0	0	0	0	0	0	0	0	0	0	0	0	0	0	0	0	0	0	0	0	0	0	0	0	0	0	0	0	0	0
49730468387594a8c32aa83f93aa8ad1	0	0	0	27	0	0	0	0	0	27	0	0	0	0	0	0	0	0	0	0	0	0	0	0	0	0	0	0	18	18	0	0	0	0	15	0	0	0	0	15	0	0	0	0	0	0	0	0	0
2238967f78998fee7f8b6d541f136422	0	0	0	0	0	0	0	0	0	0	0	0	0	0	0	0	0	0	0	0	0	0	0	0	0	0	0	0	0	0	0	0	0	0	0	0	0	0	0	0	0	0	0	0	0	0	0	0	0
13150ae81aa0f42fbbd5b581ce952977	0	0	0	0	0	0	0	0	0	0	0	0	0	0	0	0	0	0	0	0	0	0	0	0	0	0	0	0	0	0	0	0	0	0	0	0	0	0	0	0	0	0	0	0	0	0	0	0	0
02eb6a4cb05a3e73f8a6f4484a73dda7	0	0	0	18	0	0	0	0	23	41	0	0	0	0	0	0	0	0	0	0	0	0	0	0	0	0	0	0	0	0	0	0	0	0	0	0	0	0	0	0	0	0	0	0	0	0	0	0	0
2819617f47f3a1096a5add13f178dcdb	0	0	0	0	0	0	0	0	0	0	0	0	0	0	0	0	0	0	0	0	0	0	0	0	0	0	0	0	0	0	0	0	0	0	0	0	0	0	0	0	4	0	0	0	0	0	0	0	0
9f78bea8d498c67697cfdc7a2bfd178d	0	0	0	0	0	0	0	0	0	0	4	0	0	0	0	0	0	0	0	4	0	0	0	0	0	0	0	0	0	0	0	0	0	0	0	0	0	0	0	0	0	0	0	0	0	0	0	0	0
4fb92f62f50ff1a4bdfb71338d046994	0	0	0	0	0	0	0	0	0	0	0	0	0	0	0	0	0	0	0	0	0	0	0	0	0	0	0	0	0	0	0	0	0	0	0	0	0	0	0	0	0	0	0	0	0	0	0	0	0
796dda4cdecedad4c7aef15b0a9b319a	0	0	0	0	0	0	0	0	0	0	0	0	0	0	0	0	0	0	0	0	0	0	0	0	0	0	0	0	0	0	0	0	0	0	0	0	0	0	0	0	0	0	0	0	0	0	0	0	0
3ce4db299c0923b25ec64fd3864a2ade	0	0	0	0	0	0	0	0	0	0	0	0	0	0	0	0	0	0	0	0	0	0	0	0	0	0	0	0	0	0	0	0	0	0	0	0	0	0	0	0	0	0	0	0	0	0	0	0	0
13440959deab9908c66d6b3ccd7745c6	0	0	0	0	0	0	0	0	0	0	0	0	0	0	0	0	0	0	0	0	21	0	0	0	0	0	0	0	0	21	0	0	0	0	0	0	0	0	0	0	0	0	0	0	0	0	0	0	0
51baebd0a6e77e2d20c92b6f6175ed25	0	0	0	0	0	0	0	0	0	0	0	0	0	0	0	0	0	0	0	0	0	10	0	0	0	0	0	0	0	10	0	0	0	0	0	0	0	0	0	0	0	0	0	0	0	0	0	0	0
1b49a8a0ff1c022edf247fd9779301bd	0	0	0	0	0	26	0	0	0	26	0	0	0	0	0	0	0	0	0	0	0	0	0	0	0	0	0	0	0	0	0	0	0	0	0	0	0	0	0	0	0	0	0	0	0	0	0	0	0
c3cdbf75fbfed81bf3c065b2ead3eae6	0	0	0	0	0	0	0	0	0	0	0	0	0	0	0	0	0	0	0	0	0	0	0	0	0	0	0	0	0	0	0	0	0	0	0	0	0	0	0	0	0	0	0	0	0	0	0	0	0
aa4f1863c825486ae3b8f1531065a8c6	0	0	0	0	0	0	0	0	0	0	0	0	0	0	0	0	0	0	0	0	0	0	0	0	0	0	0	0	0	0	0	0	0	0	0	0	0	0	0	0	0	0	0	0	0	0	0	0	0
31dfa9a44dd27703064f361cc734db3a	0	0	0	0	0	0	0	0	0	0	0	0	0	0	0	0	0	0	0	0	0	0	0	0	0	0	0	0	0	0	0	0	0	0	0	0	0	0	0	0	0	0	0	0	0	0	0	0	0
ae203f52936db275d58eecd36eeab082	0	0	0	0	31	0	0	0	0	31	0	0	0	0	0	0	0	0	0	0	0	0	0	0	0	0	0	0	0	0	0	0	0	0	0	0	0	0	0	0	0	0	0	0	0	0	0	0	0
179f90231f8c9e83fc4536868204ceeb	0	0	0	0	0	0	0	0	0	0	0	0	0	0	0	0	0	0	0	0	0	0	0	0	0	0	0	0	0	0	0	0	0	0	0	65	0	0	0	65	0	0	0	0	0	0	0	0	0
9098e33cecb5deef380dda797a01a8d7	0	0	0	0	0	0	0	0	0	0	0	0	0	0	0	0	0	0	0	0	0	0	0	0	0	0	0	0	0	0	0	0	0	0	0	0	0	0	0	0	0	0	0	0	0	0	0	0	0
eb1b484bbccf6c20f809f0845f78d8e4	0	0	0	0	0	0	0	0	0	0	0	0	0	0	0	0	0	0	0	0	0	0	0	0	0	0	0	0	0	0	0	0	0	0	0	0	0	0	0	0	0	0	0	0	0	0	0	0	0
50231bdcb4802356ed7c0a174e1e12e5	0	0	0	0	0	0	0	0	0	0	0	0	0	0	0	0	0	0	0	0	0	0	0	0	0	0	0	0	0	0	0	0	0	0	0	0	0	0	0	0	0	0	0	0	0	0	0	0	0
557352c12cb19f409bf5053e855b13c4	0	0	0	0	0	0	0	0	0	0	0	0	0	0	0	0	0	0	0	0	0	0	0	0	0	0	0	0	0	0	0	0	0	0	0	0	0	0	0	0	0	0	0	0	0	0	0	0	0
5ea9c9f304117560f595b8d4da978533	0	0	0	0	0	0	0	0	0	0	0	0	0	0	0	0	0	0	0	0	0	0	0	0	0	0	0	0	0	0	0	0	0	0	0	0	0	0	0	0	0	0	0	0	0	0	0	0	0
5f0153d55658ad6f57833246fd44f43e	0	0	0	0	0	0	0	0	0	0	0	0	0	0	0	0	0	0	0	0	0	0	0	0	0	0	0	0	0	0	0	0	0	0	0	0	0	24	0	24	0	0	0	0	0	0	0	0	0
a9c4623c2c150c952b7d3cbd50c0f2ad	0	0	0	0	0	0	0	0	0	0	0	0	0	0	0	0	0	0	0	0	0	0	0	0	0	4	0	0	0	4	0	0	0	0	0	0	0	0	0	0	0	0	0	0	0	0	0	0	0
4c4b38812f5fe5c18221c721631474af	0	0	0	0	0	0	0	0	0	0	0	0	0	0	0	0	0	0	0	0	0	0	0	0	0	0	0	0	0	0	0	0	0	0	0	0	0	0	0	0	0	0	0	0	0	0	0	0	0
34249e4279dfb001139a6cdfd3594f3b	0	0	0	0	0	0	0	0	0	0	0	0	0	0	0	0	0	0	0	0	0	0	0	0	0	0	0	0	0	0	0	0	0	35	0	0	0	0	0	35	0	0	0	0	0	0	0	0	0
e301292d1a5a0ac905188e7ee9f4dacd	0	0	0	0	0	0	0	0	0	0	0	0	0	0	0	0	0	0	0	0	0	0	0	0	0	0	0	0	0	0	0	0	0	0	0	4	0	0	0	4	0	0	0	0	0	0	0	0	0
dd6e9dcebf06aaacd068d7e00971ed8b	0	23	0	0	0	0	0	5	0	28	0	0	0	0	0	0	0	0	0	0	0	0	0	0	0	12	0	0	0	12	0	0	0	0	0	0	0	0	0	0	0	0	0	0	0	0	0	0	0
23dc4ba01f34a60fd49ce9a051a0ac8e	0	0	0	0	0	0	0	0	0	0	0	0	0	0	0	0	0	0	0	0	0	0	0	0	0	0	0	0	0	0	0	0	0	0	0	0	0	0	0	0	0	0	0	0	0	0	0	0	0
d03629bbe204b3e9103d1272f99a5577	0	0	0	0	0	0	0	0	0	0	0	0	0	0	0	0	0	0	0	0	0	0	0	0	0	0	0	0	0	0	0	0	0	0	0	0	0	0	0	0	0	0	0	0	0	0	0	0	0
82df21d03909750ff75fa23f98611d80	0	0	0	0	0	0	0	0	0	0	0	0	0	0	0	0	0	0	0	0	0	0	0	0	0	0	0	0	0	0	0	0	0	0	0	0	0	0	0	0	0	0	0	0	0	0	0	0	0
d43182074167229d83319dde78504337	0	0	0	0	0	0	0	0	0	0	0	0	0	0	0	0	0	0	0	0	0	0	0	0	0	0	0	0	0	0	0	0	0	0	0	0	0	0	0	0	0	0	0	0	0	0	0	0	0
332e094b6839352bfc6961c4e2ffcf95	0	0	0	17	0	0	0	0	0	17	0	0	0	0	0	0	0	0	0	0	0	0	0	0	19	0	0	0	0	19	0	0	0	0	0	0	0	0	0	0	0	0	0	0	0	0	0	0	0
f6278a7a658a3ed794812d0cd5eef895	0	0	0	0	0	0	0	0	0	0	0	0	0	7	0	0	0	0	3	10	0	0	0	0	8	0	0	0	0	8	0	0	0	0	8	0	0	0	0	8	0	0	0	6	0	0	0	0	0
2d0689e33bcca185359cb01ac2604679	0	0	0	0	0	0	0	0	0	0	0	13	0	0	0	0	0	0	0	13	0	0	0	0	0	0	0	0	0	0	0	0	0	0	0	0	0	0	0	0	0	0	0	0	0	0	0	0	0
69982d10c466bd2389d01655a8e903cd	0	0	0	0	0	0	0	6	16	22	0	0	0	0	0	0	0	7	0	7	0	0	0	0	0	0	0	0	0	0	0	0	0	0	0	0	0	0	0	0	0	0	0	0	0	0	0	0	0
a0accdd0d407ab42d2d952c844515fc7	0	0	0	0	0	0	0	0	0	0	0	0	0	0	0	0	0	0	0	0	0	0	0	0	19	0	0	0	0	19	0	0	0	0	0	0	0	0	0	0	0	0	0	0	0	0	0	0	0
e0fd40ee5f3bea31a909cd88a75533d5	0	0	0	0	16	0	0	0	0	16	0	0	0	0	0	0	0	0	0	0	0	0	0	0	0	0	0	0	0	0	0	0	0	0	0	0	0	0	0	0	0	0	0	0	0	0	0	0	0
efa7d752e7f27e8fcf5597e7efad9edb	0	0	0	0	0	0	0	0	0	0	0	0	0	0	0	0	0	0	0	0	0	0	0	0	0	0	0	0	0	0	0	0	0	0	0	0	0	0	0	0	0	0	0	0	0	0	0	0	0
eda215366209cdbcd5c8a11edb9fcb0c	0	0	0	0	0	0	0	0	0	0	0	0	0	0	0	0	0	0	0	0	0	0	0	0	0	0	0	0	0	0	0	0	0	0	0	0	0	0	0	0	0	0	0	0	0	0	0	0	0
9bebc74502908c649cf1b43dd1c0814c	0	0	0	0	0	0	0	0	0	0	0	0	0	0	0	0	0	0	0	0	0	0	0	0	0	0	0	0	0	0	0	0	0	0	0	0	0	0	0	0	0	0	0	0	0	0	0	0	0
9bef94413da941c8096342d7d88bdeb5	0	0	0	0	0	0	0	0	0	0	0	0	0	0	0	0	0	0	0	0	0	0	0	0	0	0	0	0	0	0	0	0	0	0	0	0	0	0	0	0	0	0	0	0	0	0	0	0	0
2413083446c4640577da678eb99e7b54	0	0	0	0	0	0	0	0	0	0	0	0	0	0	0	0	0	0	0	0	0	0	0	0	0	0	0	0	0	0	0	0	0	0	0	0	0	0	0	0	0	0	0	0	0	0	0	0	0
1211ed55a0a95e979bb4a980e8289a20	0	0	0	0	0	0	0	0	0	0	0	0	0	0	0	0	0	0	0	0	0	0	0	0	0	0	0	0	0	0	0	0	0	0	0	0	0	0	0	0	0	0	0	0	0	0	0	0	0
48dbf1f411a678c94a09834b84ba0e69	15	0	0	0	0	0	0	0	0	15	0	0	0	0	0	0	0	0	0	0	0	0	0	0	0	0	0	0	0	0	0	0	0	0	0	0	0	0	0	0	0	0	0	0	0	0	0	0	0
2aa8dba55d19603c9bc67f46faf55ccd	0	0	0	0	0	0	0	0	0	0	0	0	0	0	8	5	0	0	0	13	0	0	0	0	0	0	0	0	0	0	0	0	0	0	0	0	0	0	0	0	0	0	0	0	0	0	0	0	0
00126c1e425b9497e29cbbb976637c85	12	0	0	0	0	0	0	0	50	62	0	0	0	0	0	0	0	0	0	0	0	0	0	0	0	0	0	0	0	0	0	0	0	0	0	0	0	0	0	0	0	0	0	0	0	0	0	0	0
ee4ed0e5149de0265ad4109174d4c4cc	0	0	0	0	62	0	0	0	0	62	0	0	0	0	0	0	0	0	0	0	0	0	0	0	0	0	0	0	0	0	0	0	0	0	0	0	0	0	0	0	0	0	0	0	0	0	0	0	0
905318f13a2ead84748201ceaee011f4	0	0	0	0	0	0	62	0	0	62	0	0	0	0	0	0	0	0	0	0	0	0	0	0	0	0	0	0	0	0	0	0	0	0	0	0	0	0	0	0	0	0	0	0	0	0	0	0	0
5b7355518787e6d6aa35f74cb606ef6d	0	0	0	0	0	0	0	0	0	0	0	0	0	0	0	0	0	0	0	0	0	0	0	0	0	0	0	0	0	0	0	0	0	0	0	0	0	0	0	0	0	0	0	0	0	0	0	0	0
b9506748288f238899addf43f48a8567	0	0	0	0	0	0	0	0	0	0	0	0	0	0	0	0	0	0	0	0	0	0	0	0	0	0	0	0	0	0	0	0	0	0	0	0	0	0	0	0	0	0	0	0	0	0	0	0	0
60572b1c45f7d963a9da99f4dd05f16b	0	0	0	0	0	0	0	0	0	0	0	0	0	0	5	0	0	0	0	5	0	0	0	0	0	0	0	0	0	0	0	0	0	13	0	0	0	0	0	13	0	0	0	0	0	0	0	0	0
a84c9e8c8d325e245f416561daa0f76c	0	0	0	0	0	0	0	0	0	0	0	0	0	0	0	0	0	0	0	0	0	0	0	0	0	0	0	0	0	0	0	0	0	0	0	0	0	0	0	0	0	0	0	0	0	0	0	0	0
246b656551b9fcdc86c426eba243c7ad	0	0	0	0	0	0	0	0	0	0	0	0	0	0	0	0	0	0	0	0	0	0	0	0	0	0	0	0	0	0	0	0	0	0	0	0	0	0	0	0	0	0	0	0	0	0	0	0	0
83d8ef4e84a58199dab1237036feb1c2	0	0	0	0	0	0	0	0	0	0	0	0	0	0	0	0	0	0	0	0	0	0	0	0	0	0	0	0	0	0	0	0	0	0	0	0	0	0	0	0	0	0	0	0	0	0	0	0	0
b2bf0ab570aacca340fca841425136e8	0	0	0	0	0	0	0	0	0	0	0	0	0	0	0	0	0	0	0	0	0	0	0	0	0	0	0	0	0	0	0	0	0	0	0	0	0	0	0	0	0	0	0	0	0	0	0	0	0
53d7ecb5194a56df8cfe5721bda55d85	0	0	0	0	0	0	0	0	0	0	0	0	0	0	0	0	0	0	0	0	0	0	0	0	0	0	0	0	0	0	0	0	0	0	0	0	0	0	0	0	0	0	0	0	0	0	0	0	0
8ccd5732a9725e3ac7d59a908de4a96e	0	0	11	0	0	0	0	0	0	11	0	0	0	0	0	0	0	0	0	0	0	0	0	0	0	0	0	0	0	0	0	0	0	0	0	0	0	0	0	0	0	0	0	0	0	0	0	0	0
97d8c96723e057e9bc9568fb4433297f	0	0	0	0	0	0	0	0	0	0	0	0	0	0	0	0	0	0	0	0	0	0	0	0	0	0	0	0	0	0	0	0	0	0	0	0	0	0	0	0	0	0	0	0	0	0	0	0	0
3d1e34313fb03e486661a6c603dd55a1	0	0	0	0	0	0	0	0	0	0	0	0	0	0	0	0	0	0	0	0	0	0	0	0	0	0	0	0	0	0	0	0	0	0	0	0	0	0	0	0	0	0	0	0	0	0	0	0	0
c41634fd0c5b7429fe50e3b65b8b8b53	0	0	0	0	0	0	0	0	0	0	0	0	0	0	0	0	0	0	0	0	0	0	0	0	0	0	0	0	0	0	0	0	0	0	0	0	0	0	0	0	0	0	0	0	0	0	0	0	0
d1683fe4bace5fae8d66dd219c0c2a09	0	0	0	0	0	0	0	0	0	0	0	0	0	0	0	0	0	0	0	0	0	0	0	0	0	0	0	0	0	0	0	0	0	0	0	0	0	0	0	0	0	0	0	0	0	0	0	0	0
fc8eff3625c3476020073a8c05daf751	0	0	0	0	0	0	0	0	0	0	0	0	0	0	0	0	0	0	0	0	0	0	0	0	0	0	0	0	0	0	0	0	0	0	0	0	0	0	0	0	0	0	0	0	0	0	0	0	0
ebfd012acd8b069c41e5ee943a44af94	0	11	0	0	0	0	0	0	0	11	0	0	0	0	0	2	0	0	0	2	0	4	0	0	0	0	0	0	0	4	0	0	0	0	0	0	0	0	0	0	6	0	0	0	0	0	0	0	0
72ccae0854bc660eefb910bb808cf555	0	0	0	0	0	0	0	0	0	0	0	0	0	0	0	0	0	0	0	0	0	0	0	0	0	0	0	0	0	0	0	0	0	0	0	0	0	0	0	0	0	0	0	0	0	0	0	0	0
ea8ac4d82ed7c8c81148f8a9d33cebd4	0	0	0	0	0	0	0	0	0	0	0	0	0	0	0	0	0	0	0	0	0	0	0	0	0	0	0	14	0	14	0	0	0	0	0	0	0	0	0	0	0	0	0	0	0	0	0	0	0
0c38189d9f1ee13dcc541d0945bf49de	0	0	0	0	0	0	0	0	0	0	0	0	0	0	0	0	0	0	0	0	0	0	0	0	0	0	0	0	0	0	0	0	0	0	0	0	0	0	0	0	0	0	0	0	0	0	0	0	0
f5172887508b0784535f59d23d44fe51	0	0	0	0	0	0	0	0	0	0	0	0	0	0	0	0	0	0	0	0	0	0	0	0	0	0	0	0	0	0	0	0	0	0	0	0	0	0	0	0	0	0	0	0	0	0	0	0	0
127383295d06af4c4d3ab12d195af5ce	0	0	0	0	0	0	0	0	0	0	0	0	0	0	0	0	0	0	0	0	0	0	0	0	0	0	0	0	0	0	0	0	0	0	0	0	0	0	0	0	0	0	0	0	0	0	0	0	0
658ca412d46f7faba5d49a3dc59041c8	0	0	0	0	0	0	0	0	0	0	0	0	0	0	0	0	0	0	0	0	0	0	0	0	0	0	0	0	0	0	0	0	0	0	0	0	0	0	0	0	0	0	0	0	0	0	0	0	0
99ecefc1fea4274018461e2082d25bfb	0	0	0	0	0	0	0	0	0	0	0	0	0	0	0	0	0	0	0	0	0	0	0	0	0	0	0	0	0	0	0	0	0	0	0	0	0	0	0	0	0	0	0	0	0	0	0	0	0
b83b716d87ab39b71f942aeae7de8d8f	0	0	0	0	0	0	0	0	0	0	0	0	0	0	0	0	0	0	0	0	0	0	0	0	0	0	0	0	0	0	0	0	0	0	0	0	0	0	0	0	0	0	0	0	0	0	0	3	0
9b02472cef5c3ebe37b0f0279a406fba	0	0	0	0	0	0	0	0	0	0	0	0	0	0	0	0	0	0	0	0	0	0	0	0	0	0	0	0	0	0	0	0	0	0	0	0	0	0	0	0	0	0	0	0	0	0	0	0	0
2562cdb255388ac0e4a0b6706e8a46f5	0	0	0	0	0	0	0	0	0	0	0	0	0	0	0	0	0	0	0	0	0	0	0	0	0	0	0	0	0	0	0	0	0	0	0	0	0	0	0	0	0	0	0	0	0	0	0	0	0
13a3653fd178174f07623b9123706e25	0	0	0	0	0	0	0	0	0	0	0	0	0	0	0	0	0	0	0	0	0	0	0	0	0	0	0	0	0	0	0	0	0	0	11	0	14	0	0	25	0	0	0	0	0	0	0	0	0
2bf0824fc33a0ed819185cbafc517878	0	0	0	0	18	0	8	0	13	39	0	0	0	0	0	0	0	0	0	0	0	0	0	0	0	0	0	0	0	0	0	0	0	0	0	0	0	0	0	0	0	0	0	0	0	0	0	0	0
6001b5ba2ed730cf92b1cdd2d80745ed	0	0	0	0	13	0	0	0	0	13	0	0	0	0	0	0	0	0	0	0	0	0	0	0	0	0	0	0	0	0	0	0	0	0	0	0	0	0	0	0	0	0	0	0	0	0	0	0	0
a7af114a4d7336ad6e3fedce8b067a85	0	0	0	0	0	0	0	0	0	0	0	0	0	0	0	0	0	0	0	0	0	0	0	0	0	0	0	0	0	0	0	0	0	0	0	0	0	0	0	0	0	0	0	0	0	0	0	0	0
0fe6dc3645ab9b523d3e979173274d5b	0	0	0	0	0	0	0	0	0	0	0	0	0	0	0	0	0	0	0	0	0	0	0	0	0	0	0	0	0	0	0	0	0	0	0	0	0	0	0	0	0	0	0	0	0	0	0	0	0
e757fa2373abb5227950418cd796499f	0	0	0	0	0	0	0	0	0	0	0	0	0	0	0	0	0	0	0	0	0	0	0	0	0	0	0	0	0	0	0	0	0	0	0	0	0	0	0	0	0	0	0	0	0	0	0	0	0
033ff14b66bfddc568f9549eeca659a6	0	0	0	0	0	0	0	0	0	0	0	0	0	0	0	0	0	0	0	0	0	0	0	0	0	0	0	0	0	0	0	0	0	0	0	0	0	0	0	0	0	0	0	0	0	0	0	0	0
d203779ef0cb011929ae1a9aa2276cc5	0	0	0	0	0	0	0	0	0	0	0	0	0	0	0	0	0	0	0	0	0	0	0	0	0	0	0	0	0	0	0	0	0	0	0	0	0	0	0	0	0	0	0	0	0	0	0	0	0
12b42ad0927f29ead0ae5147c99ac049	0	0	0	0	0	0	0	0	0	0	0	0	0	0	0	0	0	0	0	0	0	0	0	0	0	0	0	0	0	0	0	0	0	0	0	0	0	0	0	0	0	0	0	0	0	0	0	0	0
11812149e16a2234545145cfb819da62	0	0	0	0	0	0	0	0	0	0	0	0	0	0	0	0	0	0	0	0	0	0	0	0	0	0	0	0	0	0	0	0	0	0	0	0	0	0	0	0	0	0	0	0	0	0	0	0	0
a9f68f21b736f4178b90913a6ad521f6	0	0	0	0	0	0	0	0	0	0	0	0	9	0	0	0	0	0	0	9	0	0	0	0	0	0	0	0	0	0	0	0	0	0	0	0	0	0	0	0	0	0	0	0	0	0	0	0	0
b49be7fbecb861a8690cdbfd32a52f1d	0	0	0	0	0	0	0	0	0	0	0	0	0	0	0	0	0	0	0	0	0	0	0	0	0	0	0	0	0	0	0	0	0	36	9	0	0	0	0	45	0	0	0	0	0	0	0	0	0
c8ccd7ae079ac490f21ba4caa494fccb	0	0	0	0	0	0	0	0	16	16	0	0	0	0	0	0	0	0	0	0	0	0	0	0	0	0	0	0	0	0	0	0	0	0	0	0	0	0	0	0	0	0	0	0	0	0	0	0	0
cdb367aa87fd717b7608206c79f4d56c	0	0	0	0	0	0	0	0	0	0	0	0	0	0	0	0	0	0	0	0	0	0	0	0	0	0	0	0	0	0	0	0	0	0	0	0	0	0	0	0	0	0	0	0	0	0	0	0	0
8ff11595076e5e0a73ce229c4220d612	0	0	0	0	0	0	0	0	0	0	0	0	0	0	0	0	0	0	0	0	0	0	0	0	0	0	0	0	0	0	0	0	0	0	0	0	0	0	0	0	0	0	0	0	0	0	0	0	0
8fbe5d9fd681f6666309ffb163299d14	0	0	0	0	0	0	0	0	0	0	0	0	0	0	0	0	0	0	0	0	0	0	0	0	0	0	0	0	0	0	0	0	0	0	0	0	0	0	0	0	0	0	0	0	0	0	0	0	0
91a78d4f9f311379103e1e9cbed5c895	0	0	0	0	0	0	0	0	0	0	0	0	0	0	0	0	0	0	0	0	0	0	0	0	0	0	0	0	0	0	0	0	0	0	0	0	0	0	0	0	14	0	0	0	0	0	0	0	0
44e3af069670df444088c684c52fefac	0	0	0	0	0	0	0	0	0	0	0	6	0	0	0	0	0	0	0	6	0	0	0	0	0	0	0	0	0	0	0	0	0	0	0	0	0	0	0	0	0	0	0	0	0	0	0	0	0
407d7bc5ea025b789200ee36508b46b7	0	0	0	0	0	0	0	0	0	0	0	0	0	0	0	0	0	0	0	0	0	0	0	0	0	0	0	0	0	0	0	0	0	0	0	0	0	0	0	0	0	0	0	0	0	0	0	0	0
7b2aea88bde36d7c754567ec056df2f4	0	0	0	0	0	0	0	0	0	0	0	0	0	0	0	0	0	0	0	0	0	0	0	0	0	0	0	0	0	0	0	15	0	0	0	0	0	0	0	15	0	0	0	0	0	0	0	0	0
398a41d14ddf9d44459d65b4afe0da07	0	0	0	0	0	0	0	0	0	0	0	0	0	0	0	0	0	0	0	0	0	0	0	0	0	0	0	0	0	0	0	0	0	0	0	0	0	0	0	0	0	0	0	0	0	0	0	0	0
ec7a83d3622a6fa691308034f825ee8a	0	0	0	0	0	0	0	0	0	0	0	0	0	0	0	0	0	0	0	0	0	0	0	0	0	0	0	0	0	0	0	0	0	0	0	0	0	0	0	0	0	0	0	0	0	0	0	0	0
4bed596db68fc80f8d580cb90276cf6b	0	0	0	0	0	0	0	0	0	0	0	0	0	0	0	0	0	0	0	0	0	0	0	0	0	0	0	0	0	0	0	0	0	0	0	0	0	0	0	0	0	0	0	0	0	0	0	0	0
f71b8c373914b3c13adcf988b3081414	0	0	0	0	0	0	0	0	0	0	0	0	0	0	0	0	0	0	0	0	0	0	0	0	0	0	0	0	0	0	0	0	0	0	0	0	0	0	0	0	0	0	0	0	0	0	0	0	0
65f243876ddd3ae90c0b16471ee4868b	0	0	0	0	0	0	0	7	0	7	0	0	0	0	0	0	0	7	0	7	0	0	0	0	0	0	0	0	0	0	0	0	0	0	0	0	0	0	0	0	0	0	0	0	0	0	0	0	0
9690fa55d60fa1b4ba7b6c747de9f2a4	0	0	0	0	23	18	0	0	0	41	0	0	0	0	0	0	0	0	0	0	0	0	0	0	0	0	0	0	0	0	0	0	0	0	0	0	0	0	0	0	0	0	0	0	0	0	0	0	0
453929bb8a6d8707ddb97f7767156e1d	0	0	0	0	0	0	0	0	0	0	0	0	0	0	0	0	0	0	0	0	0	0	4	0	0	0	0	0	0	4	0	0	0	0	0	0	0	0	0	0	0	0	0	0	0	0	0	0	0
ded65b4b53aa1c7e9751349314f485a5	0	0	0	0	55	0	0	0	0	55	0	0	0	0	0	0	0	0	0	0	0	0	0	0	0	0	0	0	0	0	0	0	0	0	0	0	0	0	0	0	0	0	0	0	0	0	0	0	0
027b4f50085ec9c7f35e37c3e1138809	0	0	0	0	0	0	0	0	0	0	0	0	0	0	0	0	0	0	0	0	0	0	0	0	0	0	0	0	0	0	0	0	0	0	0	0	0	0	0	0	0	0	0	0	0	0	0	0	0
f2cd5320f44a5eb017ea3a97129883c5	0	0	0	0	0	0	0	0	0	0	0	0	0	0	0	0	0	0	0	0	0	0	0	0	0	0	0	0	0	0	0	0	0	0	0	0	0	0	0	0	0	0	0	0	0	0	0	0	0
0b9fc01b601d76adf8ad6b9336659a8b	0	0	0	0	0	0	0	0	0	0	0	0	0	0	0	0	0	0	0	0	0	0	0	0	0	0	0	0	0	0	0	0	0	0	0	0	0	0	0	0	0	0	0	0	0	0	0	0	0
d54515f84aad0745607cd786cfdaee85	0	0	0	0	0	0	0	0	0	0	0	0	0	0	0	0	0	0	0	0	0	0	0	0	0	0	0	0	0	0	0	0	0	0	0	0	0	0	0	0	0	0	0	0	0	0	0	0	0
f7a9e09ecfa2d3815ab21d7827063bb4	0	0	0	0	0	0	0	0	0	0	0	0	0	0	0	0	0	0	0	0	0	0	0	0	0	0	0	0	0	0	0	0	0	0	0	0	0	0	0	0	0	0	0	0	0	0	0	0	0
b1da9409cbbde5c057ebd7f2d5436457	0	0	0	0	0	0	0	0	0	0	0	0	0	0	0	0	0	0	0	0	0	0	0	0	0	0	0	0	0	0	0	0	0	0	0	0	0	0	0	0	0	0	0	0	0	0	0	0	0
e729dfa7b563528870ca02318b7baf1d	0	0	0	0	0	0	0	0	0	0	0	0	0	0	0	0	0	0	0	0	0	0	0	0	0	0	0	0	0	0	0	0	0	0	0	0	0	0	0	0	0	0	0	0	0	0	0	0	0
ae64dcec4eb7eff609d9bf5939d93a87	0	0	0	0	0	0	0	0	0	0	0	0	0	0	0	0	0	9	0	9	0	0	0	0	0	0	0	0	0	0	0	0	0	0	0	0	0	0	0	0	20	0	0	0	0	0	0	0	0
02908f39475718a3c7412d52cf6602ce	0	0	0	0	0	12	0	0	0	12	0	0	0	0	0	0	0	0	0	0	0	0	0	0	0	0	0	0	0	0	0	0	0	0	0	0	0	0	0	0	8	0	13	0	0	4	0	0	2
fc968d255e86785276e9585c6390f6c7	0	0	0	0	0	0	0	0	0	0	0	0	0	0	0	0	0	0	0	0	0	0	0	0	0	0	0	0	0	0	0	0	0	0	0	0	0	0	0	0	0	0	0	0	0	0	0	0	0
58b3baa40a83a2491c32798813824b9e	10	17	0	0	23	0	0	0	0	50	0	0	0	0	0	0	0	0	0	0	0	0	0	0	0	0	0	0	0	0	0	0	0	0	0	0	0	0	0	0	0	0	0	0	0	0	0	0	0
1097fd51b5d27ce0911ceb1301f19628	0	0	0	0	0	0	0	0	0	0	0	0	0	0	0	0	0	0	0	0	0	0	0	0	0	0	0	0	0	0	0	0	0	0	0	0	0	0	0	0	0	0	0	0	0	0	0	0	0
c5de41650a6c682ea93bea109ef86622	0	0	0	0	0	0	0	0	0	0	0	0	0	0	0	0	0	0	0	0	0	0	0	0	0	0	0	0	0	0	0	0	0	0	0	0	0	0	0	0	0	0	0	0	0	0	0	0	0
34f007cbbc8eaa22810d250e47a76b67	0	0	0	0	0	0	0	0	0	0	0	0	0	0	0	0	0	0	0	0	0	0	0	0	0	0	0	0	0	0	0	0	0	0	0	0	0	0	0	0	0	0	0	0	0	0	0	0	0
afb0cb02c841704300d665e73e025956	0	0	0	0	0	0	0	0	0	0	0	0	0	0	0	0	0	0	0	0	0	0	0	0	0	0	0	0	0	0	0	0	0	0	0	0	0	0	0	0	0	0	0	0	0	0	0	0	0
503a98021b364fefe8b4e9c931b22660	0	0	0	0	0	0	0	0	0	0	0	0	0	0	0	0	0	0	0	0	0	0	0	0	0	0	0	0	0	0	0	0	0	0	0	0	0	0	0	0	0	0	0	0	0	0	0	0	0
a3a873572444705dd67d3b67e8501ca8	0	0	0	0	0	0	0	0	0	0	0	0	0	0	0	0	0	0	0	0	0	0	0	0	0	0	0	0	0	0	0	0	0	0	0	0	0	0	0	0	0	0	0	0	0	0	0	0	0
61f50fa0b4110be855773b85b09117e9	0	0	0	0	0	0	0	0	0	0	0	0	0	0	0	0	0	0	0	0	0	0	0	0	0	0	0	0	0	0	0	0	0	0	0	0	0	0	0	0	0	0	0	0	0	0	0	0	0
fd92abf980f0d20cdcb4cabaed4e27a6	0	0	0	0	0	0	0	0	0	0	0	0	0	0	0	0	0	0	0	0	0	0	0	0	0	0	0	0	0	0	0	0	0	0	0	0	0	0	0	0	0	0	0	0	0	0	0	0	0
37591506b326b033c7b8b55fa29f7b55	0	0	0	0	0	0	0	0	0	0	0	0	0	0	0	0	0	0	0	0	0	0	0	0	0	0	0	0	0	0	0	0	0	0	0	0	0	0	0	0	0	0	0	0	0	0	0	0	0
20fba6733009f7af20a91af56a2894dd	0	0	0	0	0	0	0	0	0	0	0	0	5	0	0	0	0	0	0	5	0	0	0	0	0	0	0	0	0	0	0	0	10	0	0	0	0	0	0	10	0	0	0	0	0	0	0	0	0
68da81a6d2c9495dbec1abd161cb702e	0	0	0	0	0	0	0	0	0	0	0	0	0	0	0	17	0	0	0	17	0	0	0	0	0	0	0	0	0	0	0	0	0	0	0	0	0	0	0	0	0	0	0	0	0	0	0	0	0
7afd2040867a3a3b0ed09e8d6f12272b	0	0	0	0	0	0	0	0	0	0	0	0	0	0	0	0	0	0	0	0	0	0	0	0	0	0	0	0	0	0	0	0	0	0	0	0	0	0	0	0	0	0	0	0	0	0	0	0	0
a166cf4d79fc77e6cc3bd1e0b100680a	0	0	0	0	0	0	0	0	0	0	0	0	0	0	0	0	0	0	0	0	0	0	0	0	23	0	0	0	0	23	0	0	0	0	0	0	0	0	9	9	0	0	0	0	0	0	0	0	0
2b7620990f7882edb77a7d0043d24274	0	0	0	0	0	0	0	0	0	0	0	0	0	0	0	0	0	0	0	0	0	0	0	0	10	0	0	0	0	10	0	0	0	0	0	0	0	0	0	0	0	0	0	0	0	0	0	0	0
d855149037962450098a6533e3ef0776	0	0	0	0	23	0	0	0	0	23	0	0	0	0	0	0	0	0	0	0	0	0	0	0	0	0	0	0	0	0	0	0	0	0	0	0	0	0	0	0	0	0	0	0	0	0	0	0	0
99f33d947411087ddddbf5bfea3932c5	0	0	0	0	0	0	0	0	0	0	0	0	0	0	0	0	0	0	0	0	0	0	0	0	0	0	0	0	0	0	0	0	0	0	0	0	0	0	0	0	0	0	0	0	0	0	0	0	0
befd459be9c50d9ee399ff1dcaab1bb4	0	0	0	0	0	0	0	0	0	0	0	0	0	0	0	0	0	0	0	0	0	0	0	0	0	0	0	0	0	0	0	0	0	0	0	0	0	0	0	0	0	0	0	0	0	0	0	0	0
a8af4019069ed3df6b625e35937332ad	0	0	0	0	0	0	0	0	0	0	0	0	0	0	0	0	0	0	0	0	0	0	0	0	0	0	0	0	0	0	0	0	0	0	0	0	0	0	0	0	0	0	0	0	0	0	0	0	0
8fd64bd88a444bb101f504173dab9f94	0	0	0	0	0	0	0	0	0	0	0	0	0	0	0	0	0	0	0	0	0	0	0	0	0	0	0	0	0	0	0	0	0	0	0	0	0	0	0	0	0	0	0	0	0	0	0	0	0
11c33e0bd218e5c864de72b0c5380517	0	0	0	0	0	0	0	0	0	0	0	0	0	0	0	0	0	0	0	0	0	0	0	0	0	0	0	0	0	0	0	0	0	0	0	0	0	0	0	0	0	0	0	0	0	0	0	0	0
23b6e29c67375c1e128bb246c5eaf331	0	0	0	0	0	0	0	0	0	0	0	0	0	0	0	0	0	0	0	0	0	0	0	0	0	0	0	0	0	0	0	0	0	0	0	0	0	0	0	0	0	0	0	0	0	0	0	0	0
98ebc2954a4806040747828b1d75c8d6	0	0	0	0	0	0	0	0	0	0	0	0	0	0	0	0	0	0	0	0	0	0	0	0	0	0	0	0	0	0	0	0	0	0	0	0	0	0	0	0	0	0	0	0	0	0	0	0	0
314ebdb5c21a25198ec7a481e91e08e5	0	0	0	0	0	0	0	0	0	0	0	0	0	0	0	0	0	0	0	0	0	0	0	0	0	0	0	0	0	0	0	0	0	0	0	0	0	0	0	0	0	0	0	0	0	0	0	0	0
b095c8b9f83946eb03f16b97ae86d6f1	0	0	0	0	0	0	0	0	26	26	0	0	0	0	0	0	0	0	0	0	0	0	0	0	0	0	0	0	0	0	0	0	0	0	0	0	0	0	0	0	0	0	0	0	0	0	0	0	0
9c9231252761d9f4b195dcf1f60828a7	0	8	0	0	0	0	0	0	0	8	0	0	0	0	0	0	0	6	0	6	0	0	0	0	0	0	0	0	0	0	0	0	0	0	0	0	0	0	0	0	0	0	0	0	0	0	0	0	0
73ddf773b58a2f0f9b737119511b7c77	0	0	0	0	0	0	0	0	0	0	0	0	0	0	0	0	0	0	0	0	0	0	0	0	0	0	0	0	0	0	0	0	0	0	0	0	0	0	0	0	0	0	0	0	0	0	0	0	0
0c14f07a5e6449a11a7b691624e6b387	0	0	0	0	0	0	0	0	0	0	0	0	0	0	0	0	0	0	0	0	0	0	0	0	0	0	0	0	0	0	0	0	0	0	0	0	0	0	0	0	0	0	0	0	0	0	0	0	0
87b7009e7e129a0ed5aefb8bdf894492	0	0	0	0	0	0	0	0	0	0	0	0	0	0	0	0	0	0	0	0	0	0	0	0	0	0	0	0	0	0	0	0	0	0	0	0	0	0	0	0	0	0	0	0	0	0	0	0	0
77997aeaa82b6255c34ca963a75d7081	0	0	0	0	0	0	0	0	0	0	0	0	0	0	0	0	0	0	0	0	0	0	0	0	0	0	0	0	0	0	0	0	0	0	0	0	0	0	0	0	0	0	0	0	0	0	0	0	0
c482297a2a21a1e0a905eb299b9374f0	0	0	0	0	0	0	0	0	0	0	0	0	0	0	0	0	0	0	0	0	0	0	0	0	0	0	0	0	0	0	0	0	0	0	0	0	0	0	0	0	19	0	0	0	0	0	0	0	0
b97249624b993d2a357ed3240d422bdf	11	0	0	0	0	0	0	0	0	11	0	0	0	0	0	0	0	0	0	0	0	0	0	0	0	0	0	0	0	0	0	0	0	0	0	0	0	0	0	0	0	0	0	0	0	0	0	0	0
4b05790ac4fa930cd6f2422cc37900e6	0	0	0	0	0	0	0	0	0	0	0	0	0	0	0	0	0	0	0	0	0	0	0	0	0	0	0	0	0	0	5	0	0	24	0	0	0	0	0	29	11	0	0	0	0	0	0	0	0
f8f5f981c5949e1706c78a4d53a91d30	0	0	0	0	0	0	0	0	0	0	0	0	0	0	0	0	0	0	0	0	8	0	0	0	0	0	0	0	0	8	0	0	0	0	0	0	0	0	0	0	0	0	0	0	0	0	0	0	0
c5b6544789557041d39a620357e152b2	0	0	0	0	0	0	0	0	0	0	0	0	0	0	0	0	14	0	0	14	0	0	0	0	0	0	0	0	0	0	0	0	0	0	0	0	0	0	0	0	0	0	0	0	0	0	0	0	0
bd5065aa0d832dc813ac7cff316e7ad6	0	0	0	0	11	0	0	6	8	25	0	0	0	0	0	0	0	11	0	11	0	0	0	0	0	0	0	9	0	9	0	0	0	0	0	0	0	0	0	0	0	0	0	0	0	0	0	0	0
056ee0242c4a90bfd50780152db9e2bf	0	0	0	0	0	0	0	0	0	0	0	0	0	0	0	0	0	0	0	0	10	4	0	0	0	0	0	0	0	14	0	0	0	0	0	0	0	0	0	0	0	0	0	0	0	0	0	0	0
ed21c3f19dd27b2c02ff0399c7bd2ea7	0	0	0	0	0	0	0	0	0	0	0	0	0	0	0	0	0	0	0	0	0	0	0	7	0	0	0	0	0	7	0	0	0	0	0	0	0	0	0	0	0	0	0	0	0	0	0	0	0
0ab379a1e72eef277418ee0c055cc0a5	0	0	0	0	0	0	0	0	0	0	0	0	0	0	0	0	0	0	0	0	0	0	0	0	0	0	0	0	0	0	0	0	0	0	0	0	0	0	0	0	0	0	0	0	0	0	0	0	0
d6ee966ea27a673c941e1398ed88f776	0	0	0	0	0	0	0	0	0	0	0	0	0	0	0	0	0	0	0	0	0	0	0	0	0	0	0	0	0	0	0	0	0	0	0	0	0	0	0	0	0	0	0	0	0	0	0	0	0
771c67b74894af258d291201eef62b5a	0	0	0	0	0	0	0	0	0	0	0	0	0	0	0	0	0	0	0	0	0	0	0	0	0	0	0	0	0	0	0	0	0	0	0	0	0	0	0	0	0	0	0	0	0	0	0	0	0
cd5f095844af7eae433c6fc686624b36	0	0	0	0	0	0	0	0	0	0	0	0	0	0	0	0	0	0	0	0	0	0	0	0	0	0	0	0	0	0	0	0	0	0	0	0	0	0	0	0	0	0	0	0	0	0	0	0	0
9fe30a063559337cda6f9d2cc23b3e3c	0	0	6	0	0	0	0	0	0	6	0	0	0	9	0	0	0	0	0	9	0	0	9	0	0	0	0	0	0	9	0	0	0	0	0	0	0	0	0	0	0	0	0	0	0	0	0	0	0
0f40589dc31166eb2c8b616a87f114c2	0	0	0	0	0	0	26	0	7	33	0	0	0	3	0	0	0	0	0	3	0	0	0	0	0	0	0	0	0	0	0	0	0	0	0	0	0	0	0	0	0	0	0	4	0	0	0	0	0
dff9d0b7c8659d6ef5251874bde920d1	0	0	0	0	0	0	0	0	0	0	0	0	0	0	0	0	0	0	0	0	0	0	0	0	0	0	0	0	0	0	0	0	0	0	0	0	0	0	0	0	0	0	0	0	0	0	0	0	0
a0a631dc264e143dc498b241df8fa5f4	0	0	0	0	0	0	0	0	0	0	0	0	0	0	0	0	0	0	0	0	0	0	0	0	0	0	0	0	0	0	0	0	0	0	0	0	0	0	0	0	0	0	0	0	0	0	0	0	0
d0b5c3909aaff1ba9fcc59ada38d079b	17	0	0	0	0	0	0	0	0	17	5	0	0	0	0	0	6	14	0	25	0	0	0	0	0	0	0	0	0	0	0	0	0	0	0	0	0	0	0	0	0	0	0	0	0	0	0	0	0
9b6f106659f043d8ad1029b767410809	0	0	0	0	0	0	0	0	0	0	0	0	0	0	0	0	0	0	0	0	0	0	0	0	0	0	0	12	0	12	0	0	0	0	0	0	0	0	0	0	0	0	0	0	0	0	0	0	0
0f2bdbe79fd529b1cdf6a57c89b60fcc	0	0	0	0	0	0	0	0	0	0	0	0	0	0	0	0	0	0	0	0	0	0	0	0	6	0	0	0	0	6	0	0	0	0	0	0	0	0	0	0	0	0	0	0	0	0	0	0	0
4e2b29b4741496bd21d62b549eb28bfd	0	0	0	0	0	0	6	0	0	6	0	0	0	0	0	0	0	0	0	0	0	0	0	0	0	0	0	0	0	0	0	0	0	0	0	0	0	0	0	0	0	0	0	0	0	0	0	0	0
590a0471c698d979f1c2a406ae03e9ea	0	0	0	0	0	0	0	0	0	0	0	0	0	0	0	0	0	0	0	0	0	0	0	0	0	0	0	0	0	0	0	0	0	0	0	0	0	0	0	0	0	0	0	0	0	0	0	0	0
de7a7819b97a3f9aef203f5d2757a7a6	0	0	0	0	0	0	0	0	0	0	0	0	0	0	0	0	0	0	0	0	0	0	0	0	0	0	0	0	0	0	0	0	0	0	0	0	0	0	0	0	0	0	0	0	0	0	0	0	0
0cfbc20178d4c91288d67435581a57dc	0	0	0	0	0	0	0	0	0	0	0	0	0	0	0	0	0	0	0	0	0	0	0	0	0	0	0	0	0	0	0	0	0	0	0	0	0	0	0	0	0	0	0	0	0	0	0	0	0
78089436535f01b952ed438ab7b19f9c	0	0	0	0	0	0	0	0	0	0	0	0	0	0	0	0	0	0	0	0	0	0	0	0	0	0	0	0	0	0	0	0	0	0	0	0	0	0	0	0	0	0	0	0	0	0	0	0	0
fa7f19a701b1147a2f74097f5d315122	0	0	0	0	0	0	0	0	0	0	0	0	0	0	0	0	0	0	0	0	0	0	0	0	0	0	0	0	0	0	0	0	0	0	0	0	0	0	0	0	0	0	0	0	0	0	0	0	0
f23220382c6e44ef5ceda8c11fef95ba	0	0	0	0	0	0	0	0	0	0	0	0	0	0	0	0	0	0	0	0	0	0	0	0	0	0	0	0	0	0	0	0	0	0	0	0	0	0	0	0	0	0	0	0	0	0	0	0	0
49d693781dd56b198e64d889f71d09af	0	0	0	0	0	0	0	0	0	0	0	0	0	0	0	0	0	0	0	0	0	0	0	0	0	0	0	0	0	0	0	0	0	0	0	0	0	0	0	0	0	0	0	0	0	0	0	0	0
fc805a898b9a18dd61a53bc780d6dbbc	0	0	0	0	0	0	0	0	0	0	0	0	0	0	0	0	0	0	0	0	0	0	0	0	0	0	0	0	0	0	0	0	0	0	0	0	0	0	0	0	0	0	0	0	0	0	0	0	0
5e858faa4a88c4d9a400e97520452204	0	0	0	0	0	0	0	0	0	0	0	0	0	0	0	0	0	0	0	0	0	0	0	0	0	0	0	0	0	0	0	0	0	0	0	0	0	0	0	0	0	0	0	0	0	0	0	0	0
b0b24f00cf6ee0f0b2c418c8819a1fae	0	0	0	0	0	0	0	0	0	0	0	0	0	0	0	0	0	0	0	0	0	0	0	0	0	0	0	0	0	0	0	0	0	0	0	0	0	0	0	0	0	0	0	0	0	0	0	0	0
0c6e29342cdaaf7f71538f52e08f16b1	0	0	0	0	0	0	0	0	0	0	0	0	0	0	0	0	0	0	0	0	0	0	0	0	0	0	0	0	0	0	0	0	0	0	0	0	0	0	0	0	0	0	0	0	0	0	0	0	0
0194e85d9bd81d6ca8b0c1213e66438e	0	0	0	0	0	0	0	0	0	0	0	22	0	0	0	0	0	0	0	22	0	0	0	0	0	0	0	0	0	0	0	0	0	0	0	0	0	0	0	0	0	0	0	0	0	0	0	0	0
e84aa7e5b8ed215804ac61a00016cbe8	12	0	0	0	0	0	0	0	0	12	0	0	0	0	0	0	0	0	0	0	0	0	0	0	0	0	0	0	0	0	0	0	0	0	0	0	0	0	0	0	0	0	0	19	0	0	0	0	0
9ef9a6795e101e2e877a2d136bad732b	0	7	0	0	0	0	0	0	0	7	0	0	0	0	0	0	0	0	0	0	0	0	0	0	0	0	0	0	0	0	0	0	0	0	0	0	0	0	0	0	0	0	0	0	0	0	0	6	0
6426a069e09b33b69d5e09600d65e930	0	0	0	0	0	0	0	0	0	0	0	0	0	0	0	0	12	0	0	12	0	0	0	0	0	0	0	0	0	0	0	0	0	0	0	0	0	0	0	0	0	0	0	0	0	0	0	0	0
39ff3960f12fd69a915f84a32820a9fd	0	0	0	0	0	0	0	0	0	0	0	28	0	0	0	0	0	0	0	28	0	0	0	0	0	0	0	0	0	0	0	0	0	0	0	0	0	0	0	0	0	0	0	0	0	0	0	0	0
1e00fede1599b2c535fc14536afa743b	0	0	0	0	0	0	0	0	0	0	0	0	0	0	0	0	0	0	0	0	0	0	0	0	0	0	0	0	0	0	0	11	0	0	0	0	0	0	0	11	0	0	0	0	0	0	0	0	0
7f3048f540285d6316434caee1ea9ef2	0	0	0	0	0	0	0	0	0	0	0	0	0	0	0	0	0	0	0	0	0	0	0	7	0	0	0	0	0	7	0	0	0	0	0	0	0	0	0	0	0	0	0	0	0	0	0	0	0
34ba30db67bfcf30161e5da838f75217	0	0	12	0	0	0	0	0	0	12	0	0	0	0	0	0	0	0	0	0	0	0	0	0	0	0	0	0	0	0	0	0	0	0	0	0	0	0	0	0	0	0	0	0	0	0	0	0	0
a40847040bf1bdbcd3db78dcf28ededc	0	0	0	0	0	0	0	0	0	0	0	0	0	0	0	0	0	0	0	0	0	0	0	0	0	0	0	0	0	0	0	0	0	0	0	0	0	0	0	0	0	0	0	0	0	0	0	0	0
201878254fd6df8bbee045e4099417a1	0	0	0	0	0	0	0	0	0	0	0	0	0	0	0	0	0	0	0	0	0	0	0	0	0	0	0	0	0	0	0	0	0	0	0	0	0	0	0	0	0	0	0	0	0	0	0	0	0
2a2a7f2f31296434d67961d8ae04c4f5	0	0	0	0	0	0	0	0	0	0	0	0	0	0	0	0	0	0	0	0	0	0	0	0	0	0	0	0	0	0	0	0	0	0	0	0	0	0	0	0	0	0	0	0	0	0	0	0	0
e8316d8c4f8de3459f29285016b5e388	0	0	0	0	0	0	0	0	0	0	0	0	0	0	0	0	0	0	0	0	0	0	0	0	0	0	0	0	0	0	0	0	0	0	0	0	0	0	0	0	0	0	0	0	0	0	0	0	0
45e26f37fdf464719a2dd648d8316e9b	0	0	0	0	0	0	0	0	0	0	0	0	0	0	0	0	0	0	0	0	0	0	0	0	0	0	0	0	0	0	0	0	0	0	0	0	0	0	0	0	0	0	0	0	0	0	0	0	0
5ec5148e3f6535c1027163bc715b20c5	0	0	0	0	0	0	0	0	0	0	0	0	0	0	0	0	0	0	0	0	0	0	0	0	0	0	0	0	0	0	0	0	0	0	0	0	0	0	0	0	0	0	0	0	0	0	0	0	0
4e22bf4a10e95c91a072fde43cd2af18	0	0	0	0	0	0	0	0	0	0	0	0	0	0	0	0	0	0	0	0	0	0	0	0	0	0	0	0	0	0	0	0	0	0	0	0	0	0	0	0	0	0	0	0	0	0	0	0	0
dc60921ede7239748f6133fb5782e718	0	0	0	0	0	0	0	0	0	0	0	0	0	0	0	0	0	0	0	0	0	0	0	0	0	0	0	0	0	0	0	0	0	0	0	0	0	0	0	0	0	0	0	0	0	0	0	0	0
0e1f91026c6936230e4a877c71b5263a	0	0	0	0	0	0	0	0	0	0	0	0	0	0	0	0	0	0	0	0	0	0	0	0	0	0	0	0	0	0	0	0	0	0	0	0	0	0	0	0	0	0	0	0	0	0	0	0	0
75307c3dc6295cac3594a42a5d9ff1d9	0	0	0	0	0	0	0	0	0	0	0	0	0	0	0	0	0	0	0	0	0	0	0	0	0	0	0	0	0	0	0	0	0	0	0	0	0	0	0	0	0	0	0	0	0	0	0	0	0
2f7ba0e9a9f4ea77c94e5ab8a7ac5e0e	0	0	0	0	0	0	0	0	0	0	0	0	0	0	0	0	0	0	0	0	0	0	0	0	0	0	0	0	0	0	0	0	0	0	0	0	0	0	0	0	0	0	0	0	0	0	0	0	0
1cf6192d15532ecd79d13e0995621700	15	0	0	0	0	0	0	0	0	15	0	0	0	0	0	0	0	0	0	0	0	0	0	0	0	0	0	0	0	0	3	0	0	0	0	0	10	0	0	13	0	0	0	0	0	0	0	0	0
1d516cc2625c677f231fbd3e0e2969a0	0	0	0	0	0	0	0	0	0	0	2	0	0	0	0	0	0	0	0	2	0	0	0	0	0	0	0	0	0	0	0	0	0	0	0	0	0	0	0	0	0	0	0	0	0	0	0	0	0
71a9128d0aef5c3bc70e4eabc94fbeea	0	0	0	0	0	0	0	0	0	0	0	0	0	0	0	0	0	0	0	0	0	0	0	0	0	0	0	0	0	0	0	0	0	0	0	0	0	0	0	0	0	0	0	0	0	0	0	0	0
0c7925e38329d8438abfb14670ad468c	0	0	0	0	0	0	0	0	0	0	0	0	0	0	0	0	0	0	0	0	0	10	0	0	0	0	0	0	0	10	0	0	0	0	0	0	0	0	0	0	0	0	0	0	0	0	0	0	0
cd2de37e45779b798c935b8eecff361d	0	0	0	0	0	0	0	0	0	0	0	0	0	0	0	0	0	0	0	0	0	0	3	0	0	0	0	0	0	3	0	0	0	0	0	0	0	0	0	0	0	0	0	0	0	0	0	0	0
ef22add7a50082202ed6ed40519db0d3	0	0	20	0	0	0	0	0	0	20	0	0	0	0	0	0	0	0	0	0	0	0	0	0	0	0	0	0	0	0	0	0	0	0	0	0	0	0	0	0	0	0	0	0	0	0	0	0	0
228b83487913535d777e4486479e5fd4	0	0	0	0	0	0	0	0	0	0	0	0	0	0	0	0	0	0	0	0	0	0	0	0	0	0	0	0	0	0	0	0	0	0	0	0	0	0	0	0	0	0	0	0	0	0	0	0	0
56b7283eafc5005598ea799611f79739	0	0	0	0	0	0	0	0	0	0	0	0	0	0	0	0	0	0	0	0	0	0	0	0	0	0	0	0	0	0	0	0	0	0	0	0	0	0	0	0	0	0	0	0	0	0	0	0	0
c9a755dba97688b7607b48d910dbd772	0	0	0	0	0	0	0	0	0	0	0	0	0	0	0	0	0	0	0	0	0	0	0	0	0	0	0	0	0	0	0	0	0	0	0	0	0	0	0	0	0	0	0	0	0	0	0	0	0
7d1eb159ff49b0c4d0dcf48a66345d79	0	0	0	0	0	0	0	0	0	0	0	0	0	0	0	0	0	0	0	0	0	0	0	0	0	0	0	0	0	0	0	0	0	0	0	0	0	0	0	0	0	0	0	0	0	0	0	0	0
44698f1c517d5d9c92863433936955b7	0	0	0	0	0	0	0	0	0	0	0	0	0	0	0	0	0	0	0	0	0	0	0	0	0	0	0	0	0	0	0	0	0	0	0	0	0	0	0	0	0	0	0	0	0	0	0	0	0
e80d2c301db166575832d8bbcde457fd	0	0	0	0	0	0	0	0	0	0	0	0	0	0	0	0	0	0	0	0	0	0	0	0	0	0	0	0	0	0	0	0	0	0	0	0	0	0	0	0	0	0	0	0	0	0	0	0	0
17d90bc409d261406174726869caf64f	0	0	0	0	0	0	0	0	0	0	0	0	0	0	0	0	0	0	0	0	0	0	0	0	0	0	0	0	0	0	0	0	0	0	0	0	0	0	0	0	0	0	0	0	0	0	0	0	0
afbf532ddd91261ddc9002cbba60c8bc	0	0	0	0	0	0	18	0	0	18	0	0	0	0	0	0	0	8	0	8	0	0	0	0	0	0	0	0	0	0	0	0	0	0	0	0	0	0	0	0	0	0	0	0	0	0	0	0	0
827c023716df4b71a9ab508c530ed11c	0	0	0	0	0	0	0	0	0	0	0	0	47	0	0	0	0	0	0	47	0	0	0	0	0	0	0	0	0	0	0	0	0	0	0	0	0	0	0	0	0	0	0	0	0	0	0	0	0
a67c9395d5f87649704340bbd745e83d	0	0	0	0	0	0	0	0	0	0	0	0	0	0	0	0	0	0	0	0	0	0	0	0	0	0	0	0	0	0	0	0	0	0	0	0	0	7	0	7	0	0	0	0	0	0	0	0	0
87f3b6285e9d673c2f0f744b13e833f6	0	0	0	0	0	0	0	0	0	0	0	0	0	0	0	0	0	0	0	0	0	0	0	0	0	0	0	0	0	0	0	0	0	0	0	0	0	0	0	0	0	0	0	0	0	0	0	0	0
22da1dbb127d17549980442a2fc245b5	0	0	0	0	0	0	0	0	0	0	0	0	0	0	0	0	0	0	0	0	0	0	0	0	0	0	0	0	0	0	0	0	0	0	0	0	0	0	0	0	0	0	0	0	0	0	0	0	0
9795fc85e07561a0fe60d258d673e820	0	0	0	0	0	0	0	0	0	0	0	0	0	0	0	0	0	0	0	0	0	0	0	0	0	0	0	0	0	0	0	0	0	0	0	0	0	0	0	0	0	0	0	0	0	0	0	0	0
8664f2727f1a276fda85bae8c125ff7e	0	0	0	0	0	0	0	0	0	0	0	0	0	0	0	0	0	0	0	0	0	0	0	0	0	0	0	0	0	0	0	0	0	0	0	0	0	0	0	0	0	0	0	0	0	0	0	0	0
a7fe7ed6810ad33c5aceb8468be3fe69	0	0	0	0	0	0	0	0	0	0	0	0	0	0	0	0	0	0	0	0	0	0	0	0	0	0	0	0	0	0	0	0	0	0	0	0	0	0	0	0	0	0	0	0	0	0	0	0	0
b502a44c82ed3034a8c479f48b2c95b5	0	0	0	0	0	0	0	0	0	0	0	0	0	0	0	0	0	0	0	0	0	0	0	0	0	0	0	0	0	0	0	0	0	0	0	0	0	0	0	0	0	0	0	0	0	0	0	0	0
82c9a2a3469acdf83d4fc790ef4b323a	0	0	0	0	0	0	0	0	0	0	0	0	0	0	0	0	0	0	0	0	0	0	0	0	0	0	0	0	0	0	0	0	0	0	0	0	0	0	0	0	0	0	0	0	0	0	0	0	0
10eebaedd291368f6b0d0f91573d407d	0	0	0	0	0	0	0	0	0	0	0	0	0	0	0	0	0	0	0	0	0	0	0	0	0	0	0	0	0	0	0	0	0	0	0	0	0	0	0	0	0	0	0	0	0	0	0	0	0
15c92956fdb68ffdf0675745a48be98e	0	0	0	0	0	0	0	0	0	0	0	0	0	0	0	0	0	0	0	0	0	0	0	0	0	0	0	0	0	0	0	0	0	0	0	0	0	0	0	0	0	0	0	0	0	0	0	0	0
148fac2634a823645d12931c985608c6	0	0	0	0	0	0	0	0	0	0	0	0	0	0	0	0	0	0	0	0	0	0	0	0	0	0	0	0	0	0	0	0	0	0	0	0	0	0	0	0	0	0	0	0	0	0	0	0	0
bfff3551abdb35adb81ad8f9d0c59127	0	0	5	0	0	0	0	0	0	5	0	0	0	7	0	0	0	0	0	7	0	0	5	0	0	0	0	0	0	5	0	0	0	0	0	0	0	0	0	0	0	0	0	0	0	0	0	0	0
eef82525e26e6d37a4e95d7800319c9d	0	0	0	0	0	0	0	0	0	0	0	0	0	0	0	0	0	0	0	0	0	0	0	0	0	0	0	0	0	0	0	0	0	0	0	0	0	0	0	0	0	0	0	0	46	0	0	0	0
e58a0b0d9dba7e986157d896cf162c48	0	0	0	0	0	0	0	0	0	0	0	0	0	0	0	0	10	0	0	10	0	0	0	0	0	0	0	0	0	0	0	0	0	0	0	0	0	0	0	0	0	0	0	0	0	0	0	0	5
39f44a41b1a041855751311cf5084b0b	0	11	0	0	0	0	0	0	0	11	0	0	0	0	0	0	0	0	0	0	0	0	0	0	0	0	0	0	0	0	0	0	0	0	0	0	0	0	0	0	0	0	0	0	0	0	0	0	0
a6ebc12725876049a1b212a92cc41185	0	0	0	0	12	0	0	0	0	12	0	0	0	0	0	0	0	0	0	0	0	0	0	0	0	0	0	0	0	0	0	0	0	0	0	0	0	0	0	0	0	0	0	0	0	0	0	0	0
2ae41d704ec3f4c6a2079e1165109b77	0	0	0	0	0	0	0	0	0	0	0	0	0	0	0	0	0	0	0	0	0	0	0	0	0	0	0	0	0	0	0	0	0	0	0	0	0	0	0	0	0	0	0	0	0	0	0	0	0
c93b572d7ff71e1480a6696f0d2e4c9e	0	0	0	0	0	0	0	0	0	0	0	0	0	0	0	0	0	0	0	0	0	0	0	0	0	0	0	0	0	0	0	0	0	0	0	0	0	0	0	0	0	0	0	0	0	0	0	0	0
55fc4110a9b3aa74e9756aa19fb73a32	0	0	0	0	0	0	0	0	0	0	0	0	0	0	0	0	0	0	0	0	0	0	0	0	0	0	0	0	0	0	0	0	0	0	0	0	0	0	0	0	0	0	0	0	0	0	0	0	0
662f775b4e22e5d8f32a6b07743a9a87	0	0	0	0	0	0	0	0	0	0	0	0	0	0	0	0	0	0	0	0	0	0	0	0	0	0	0	0	0	0	0	0	0	0	0	0	0	0	0	0	0	0	0	0	0	0	0	0	0
e6531a31b206d1fffbdd41550de46a2c	0	0	0	0	0	0	0	0	0	0	0	0	0	0	0	0	0	0	0	0	0	0	0	0	0	0	0	0	0	0	0	0	0	0	0	0	0	0	0	0	0	0	0	0	0	0	0	0	0
683151c319b565b4965fedb25eec800b	0	0	0	0	0	0	0	0	0	0	0	0	0	0	0	0	0	0	0	0	0	0	0	0	0	0	0	0	0	0	0	0	0	0	0	0	0	0	0	0	0	0	0	0	0	0	0	0	0
8a6c17184286af1325f235122fc61711	0	0	0	0	0	0	0	0	0	0	0	0	0	0	0	0	0	0	0	0	0	0	0	0	0	0	0	0	0	0	0	0	0	0	0	0	0	0	0	0	0	0	0	0	0	0	0	0	0
4dbbfdda9ae6bd582f5541b08fd7262d	0	0	0	0	0	0	0	0	0	0	0	0	0	0	0	0	0	0	0	0	0	0	0	0	0	0	0	0	0	0	0	0	0	0	0	0	0	0	0	0	0	0	0	0	0	0	0	0	0
2455a077b454bed3aafe35711a331a42	0	0	7	0	0	0	0	0	0	7	0	0	0	0	0	0	0	0	0	0	0	3	0	0	0	0	0	0	8	11	6	0	0	0	0	0	0	0	0	6	0	0	0	0	0	0	0	0	0
088aa754b34f3a8243d14c9f69afaddf	0	0	0	10	0	0	0	9	0	19	0	0	0	0	0	0	0	0	0	0	0	0	0	0	0	0	0	0	0	0	0	0	0	0	0	0	0	0	0	0	0	0	0	0	0	0	0	0	0
6a0e1c19d9fd5be17fc92b1ad135c12f	0	0	0	0	0	0	0	0	0	0	0	0	0	0	0	0	0	0	0	0	0	0	0	0	0	5	0	0	0	5	0	0	0	0	0	0	0	0	0	0	0	0	0	0	0	0	0	0	0
c77d9ee120c2e2743d6f3ed5aa2f6c73	0	14	0	0	0	0	0	0	0	14	0	0	0	0	0	0	0	0	0	0	0	5	0	0	0	0	0	0	0	5	0	0	0	0	0	0	0	0	0	0	0	0	0	0	0	0	0	0	0
23cdb423fc22613e4b1c927d7d176221	0	0	0	0	0	0	0	0	0	0	0	0	0	0	0	0	0	0	0	0	0	0	0	0	0	0	0	0	0	0	0	2	0	0	0	0	0	0	0	2	0	0	0	0	0	0	0	0	0
3137009f4145ea141bb1ca1b0bd92632	0	0	0	0	0	0	0	0	0	0	0	0	0	0	0	0	0	0	0	0	0	0	0	0	0	0	0	3	0	3	0	0	0	0	0	0	0	0	0	0	0	0	0	0	0	0	0	0	0
85f8798ec4d97b6cdf861aef00b23172	0	0	0	0	0	0	0	0	0	0	0	0	4	0	0	0	0	0	0	4	9	0	0	0	0	0	0	0	0	9	0	0	0	0	0	0	0	0	0	0	0	0	0	0	0	0	0	0	0
7e4ef780876e1238eed8afa66cc4ac82	0	0	0	0	0	0	0	0	0	0	0	0	0	0	0	0	0	0	0	0	0	0	0	0	0	0	0	0	0	0	0	0	0	0	0	0	0	0	0	0	0	0	0	0	0	0	0	0	0
c043204848bc534255613add52c4bc26	0	0	0	0	0	45	0	0	0	45	0	0	0	0	0	0	0	0	0	0	0	0	0	0	0	0	0	0	0	0	0	0	0	0	0	0	0	0	0	0	0	0	0	0	0	0	0	0	0
ac18fb0c4030736a73dedc4b14a26890	0	0	0	0	0	0	0	0	0	0	0	0	0	0	0	0	0	0	0	0	0	0	0	0	0	0	0	0	0	0	0	0	0	0	0	0	0	0	0	0	0	0	0	0	0	0	0	0	0
aded64d18b233c87f404afcc5aff0bc5	0	0	0	0	0	0	0	0	0	0	0	0	0	0	0	0	0	0	0	0	0	0	0	0	0	0	0	0	0	0	0	0	0	0	0	0	0	0	0	0	0	0	0	0	0	0	0	0	0
a0db4186d91f765c36b615d569ca58af	0	0	0	0	0	0	0	0	0	0	0	0	0	0	0	0	0	0	0	0	0	0	0	0	0	0	0	0	0	0	0	0	0	0	0	0	0	0	0	0	0	0	0	0	0	0	0	0	0
5eb82b3035725f3ab1cba51d2a30f082	0	0	0	0	0	0	0	0	0	0	0	0	0	0	0	0	0	0	0	0	0	0	0	0	0	0	0	0	0	0	0	0	0	0	0	0	0	0	0	0	0	0	0	0	0	0	0	0	0
1e1c7e28900db774f39279b072cc3eae	0	0	0	0	0	0	0	0	0	0	0	0	0	0	0	0	0	0	0	0	0	0	0	0	0	0	0	0	0	0	0	0	0	0	0	0	0	0	0	0	0	0	0	0	0	0	0	0	0
2d061fb670395269da636b3714bffb58	0	0	0	0	0	0	0	0	0	0	0	0	0	0	0	0	0	0	0	0	0	0	0	0	0	0	0	0	0	0	0	0	0	0	0	0	0	0	0	0	0	0	0	0	0	0	0	0	0
2b6c168d19a4c4b60df8a664d18eba44	0	0	0	0	0	0	0	0	0	0	0	0	0	0	0	0	0	0	0	0	0	0	0	0	0	0	0	0	0	0	0	0	0	0	0	0	0	0	0	0	0	0	0	0	0	0	0	0	0
185a2a22d0fb8589396150730c9ca64a	0	0	0	0	0	0	0	0	0	0	0	0	0	0	0	0	0	0	0	0	0	0	0	0	0	0	0	0	0	0	0	0	0	0	0	0	0	0	0	0	0	0	0	0	0	0	0	0	0
3443be62d40304b5ac1a392d6f0dba8b	0	0	0	0	0	0	0	0	0	0	0	0	0	0	0	0	0	0	0	0	0	0	0	0	0	0	0	0	0	0	0	0	0	0	0	0	0	0	0	0	0	0	0	0	0	0	0	0	0
5421e56c6ae74e54187a4f658aead527	0	0	0	0	0	0	0	0	0	0	0	0	0	0	0	0	0	0	0	0	0	0	0	0	0	0	0	0	0	0	0	0	0	0	0	0	0	0	0	0	0	0	0	0	0	0	0	0	0
be5c2a2c138e49f2252d4785b1e251ae	0	0	0	0	0	0	0	0	0	0	0	0	0	0	0	0	0	0	0	0	0	0	0	0	0	0	0	0	0	0	0	0	0	0	0	0	0	0	0	0	0	0	0	0	0	0	0	0	0
6328b09b4275d178631b3cd0c2f95984	0	0	0	0	0	0	0	0	0	0	0	0	0	0	0	0	0	0	0	0	0	0	0	0	0	0	0	0	0	0	0	0	0	0	0	0	0	0	0	0	0	0	0	0	0	0	0	0	0
63f396ae25ec46e97179d506dd4ea9a0	0	0	0	0	0	0	0	0	0	0	0	0	0	0	0	0	0	0	0	0	0	0	0	0	0	0	0	0	0	0	0	0	0	0	0	0	0	0	0	0	0	0	0	0	0	0	0	0	0
85aea5ea276be0766554894a35afffaa	0	0	0	0	0	0	0	0	0	0	0	0	0	0	0	0	0	0	0	0	0	0	0	0	0	0	0	0	0	0	0	0	0	0	0	0	0	0	0	0	0	0	0	0	0	0	0	0	0
b98f232390e45c880bdba3939b083f8b	0	0	0	0	0	0	0	0	0	0	0	0	0	0	0	0	0	0	0	0	0	0	0	0	0	0	0	0	0	0	0	0	0	0	0	0	0	0	0	0	0	0	0	0	0	0	0	0	0
de439c7851bd2d600477224e84335619	0	0	0	0	0	0	27	0	0	27	0	0	0	0	0	0	0	0	0	0	0	0	0	0	0	0	0	0	0	0	0	0	0	0	0	0	0	0	0	0	0	0	0	0	0	0	0	0	0
1ea5a16b9469fca6dc94993d25c54058	0	0	0	0	0	0	0	0	0	0	0	0	0	0	0	0	0	0	0	0	0	0	0	0	0	0	0	0	0	0	0	0	0	0	0	0	0	0	0	0	0	0	0	0	0	0	0	0	0
d2cad58d1bf08669eacb4065f3dcd467	0	0	0	0	0	0	0	0	0	0	0	0	0	0	0	0	0	0	0	0	0	0	0	0	0	0	0	0	0	0	0	0	0	0	0	0	0	0	0	0	21	0	0	0	0	0	0	0	0
799b9d191a7be9802af40b2c1a1ed465	0	0	0	0	0	0	0	0	0	0	0	0	0	0	0	0	0	0	0	0	0	8	0	0	0	0	0	0	0	8	0	0	0	0	0	0	0	0	0	0	0	0	0	0	0	0	0	0	0
5e7cb579668e8fa2cbd0c9c84df7664f	10	0	0	0	0	0	0	0	0	10	0	0	0	0	0	0	0	0	0	0	0	0	0	0	29	0	0	0	0	29	0	0	0	0	0	0	0	0	0	0	0	0	0	0	0	0	0	0	0
e98e74409a3bea3bb7ffc94a25e5c1b2	0	0	0	0	0	0	0	0	0	0	0	31	0	0	4	4	0	0	0	39	0	0	0	0	0	0	0	0	0	0	0	0	0	0	0	0	0	0	0	0	0	0	0	0	0	0	0	0	0
fbb5f03b68616ef622f7dc3f925e4d26	0	0	0	0	0	0	0	0	0	0	0	0	0	0	0	0	0	0	0	0	0	0	0	0	0	0	0	0	0	0	0	0	0	0	0	0	0	7	0	7	0	0	0	0	0	0	0	0	0
37e54bc06a8bf75af4d5802a951841fc	0	0	0	0	0	0	0	0	0	0	0	0	0	0	0	0	0	0	0	0	0	0	0	0	0	0	0	0	0	0	0	0	0	0	0	0	0	0	0	0	0	0	0	0	0	0	0	0	0
a19367b0d8bf501e2d8675128ab1f379	0	0	0	0	0	0	0	0	0	0	0	0	0	0	0	0	0	0	0	0	0	0	0	0	0	0	0	0	0	0	0	0	0	0	0	0	0	0	0	0	0	0	0	0	0	0	0	0	0
cb738640b8f3118f7cf538bc24c7486c	0	0	0	0	0	0	0	0	0	0	0	0	0	0	0	0	0	0	0	0	0	0	0	0	0	0	0	0	0	0	0	0	0	0	0	0	0	0	0	0	0	0	0	0	0	0	0	0	0
327ae428b9e2d3d3b77e1afee10e98ea	0	0	0	0	0	0	0	0	0	0	0	0	0	0	0	0	0	0	0	0	0	0	0	0	0	0	0	0	0	0	0	0	0	0	0	0	0	0	0	0	0	0	0	0	0	0	0	0	0
809746e1e4dd2b3179aaa83b14426ec2	0	0	0	0	0	0	0	0	0	0	0	0	0	0	0	0	0	0	0	0	0	0	0	0	0	0	0	0	0	0	0	0	0	0	0	0	0	0	0	0	0	0	0	0	0	0	0	0	0
7359d4c71617e8e2cf74b2e25d98f67d	0	0	0	0	0	0	0	0	0	0	0	0	0	0	0	0	0	0	0	0	0	0	0	0	0	0	0	0	0	0	0	0	0	0	0	0	0	0	0	0	0	0	0	0	0	0	0	0	0
7991dd4ba1ce84188f647289dcc99fc0	0	0	0	0	0	0	0	0	0	0	0	0	0	0	0	0	0	0	0	0	0	0	0	0	0	0	0	0	0	0	0	0	0	0	0	0	0	0	0	0	0	0	0	0	0	0	0	0	0
6b97d042ce3c320fcdcdc171693741dc	0	0	0	0	0	0	0	0	0	0	0	0	0	0	0	0	0	0	0	0	0	0	0	0	0	0	0	0	0	0	0	0	0	0	0	0	0	0	0	0	0	0	0	0	0	0	0	0	0
ec1b25319cbc3b2cd4a5287081e7cc23	0	0	0	0	0	0	0	0	0	0	0	0	0	0	0	0	0	0	0	0	0	0	0	0	0	0	0	0	0	0	0	0	0	0	0	0	0	0	0	0	0	0	0	0	0	0	0	0	0
1be388d1cdba0e672d5e1edeffdb415c	0	0	0	0	0	0	0	0	0	0	0	0	0	0	0	0	0	0	0	0	0	0	0	0	19	0	0	0	0	19	0	0	0	0	0	0	0	0	0	0	0	0	0	0	0	0	0	0	0
653a9380889ba4d2a49bc91ede77d91b	0	0	0	0	0	0	0	0	0	0	0	0	0	0	0	0	0	0	0	0	0	0	0	0	0	0	0	0	0	0	0	0	0	0	0	0	0	0	8	8	0	0	0	0	0	0	0	0	0
5feee67a94e7fb62dea5da5e830bafee	30	0	0	0	0	0	0	0	0	30	0	0	0	0	0	0	0	0	0	0	0	0	0	0	0	0	0	0	0	0	0	0	0	0	0	0	0	0	0	0	0	0	0	0	0	0	0	0	0
c71fb770a9c9a7c54105074cb81c6e65	0	0	0	0	0	0	0	0	0	0	0	0	0	0	0	0	0	0	0	0	0	0	0	0	0	0	0	0	0	0	0	0	0	0	0	0	0	0	0	0	0	0	0	0	0	0	0	0	0
b6f0fc1c67c9a6d0bf194abed914c630	0	0	0	0	0	0	0	0	0	0	0	0	0	0	0	0	0	0	0	0	0	0	0	0	0	0	0	0	0	0	0	0	0	0	0	0	0	0	0	0	0	0	0	0	0	0	0	0	0
cfb668d5293e21f98da7ebb28542b49a	0	0	0	0	0	0	0	0	0	0	0	0	0	0	0	0	0	0	0	0	0	0	0	0	0	0	0	0	0	0	0	0	0	0	0	0	0	0	0	0	0	0	0	0	0	0	0	0	0
120cb6db3b54b5a5958ee8820c8856bd	0	0	0	0	0	0	0	0	0	0	0	0	0	0	0	0	0	0	0	0	0	0	0	0	0	0	0	0	0	0	0	0	0	0	0	0	0	0	0	0	0	0	0	0	0	0	0	0	0
2a8966efdf1448840b9ab73bad4e088b	0	0	0	0	0	0	0	0	0	0	0	0	0	0	0	0	0	0	0	0	0	0	0	0	0	0	0	0	0	0	0	0	0	0	0	0	0	0	0	0	0	0	0	0	0	0	0	0	0
8f6b2da8bf5d6568bfe1400c2fdac8ae	0	0	0	0	0	0	0	0	0	0	0	0	0	0	0	0	0	0	0	0	0	0	0	0	0	0	0	0	0	0	0	0	0	0	0	0	0	0	0	0	0	0	0	0	0	0	0	0	0
e7fd4d1b44c5324cc94c9abe1420621a	0	0	0	0	0	0	0	0	0	0	0	0	0	0	0	0	0	0	0	0	0	0	0	0	0	0	0	0	0	0	0	0	0	0	0	0	0	0	0	0	0	0	0	0	0	0	0	0	0
a431a1c43e82de5b885d7cab6edcf491	0	0	0	0	0	0	0	0	0	0	0	0	0	0	0	0	0	0	0	0	0	0	0	0	0	0	0	0	0	0	0	0	0	0	0	0	0	0	0	0	0	0	0	0	0	0	0	0	8
e86c06e459daf1b1f946d2caf11e2572	0	0	0	0	0	0	0	0	0	0	7	0	0	0	0	0	0	0	0	7	0	0	0	0	0	0	0	0	0	0	7	0	0	0	0	0	0	0	0	7	0	0	0	0	0	0	0	0	0
fb9bb86448dc7c344e6725bce7506bdd	0	0	0	0	0	0	0	0	0	0	0	21	0	0	0	0	0	18	0	39	0	0	0	0	0	0	0	0	0	0	0	0	0	0	0	0	0	0	0	0	0	0	0	0	0	0	0	0	0
845c13c7b96245bce8372ad9bad88482	0	21	0	0	0	0	0	0	0	21	0	0	21	0	0	0	0	0	0	21	0	0	0	0	0	0	0	0	0	0	0	0	0	0	0	0	0	0	0	0	0	0	0	0	0	0	0	0	0
62ca2e6b32147517a84f61de4facbaa6	0	0	0	0	0	0	0	0	0	0	0	0	0	0	0	0	10	0	0	10	0	0	0	0	0	0	0	0	0	0	0	0	0	0	0	0	0	0	0	0	0	0	0	0	0	0	0	0	0
db2c28ac9cb06e3b939b4b7f0d5bb0ea	0	0	0	0	0	0	0	0	0	0	0	0	0	0	0	0	0	0	0	0	0	0	0	0	0	0	0	0	0	0	0	0	0	0	0	0	0	0	0	0	0	0	0	0	0	0	0	0	0
4541c943040eb5fc8381bac15eaec55e	0	0	0	0	0	0	0	0	0	0	0	0	0	0	0	0	0	0	0	0	0	0	0	0	0	0	0	0	0	0	0	0	0	0	0	0	0	0	0	0	0	0	0	0	0	0	0	0	0
5a42b5af616ba5ec60f2afb5b4fb90a3	0	0	0	0	0	0	0	0	0	0	0	0	0	0	0	0	0	0	0	0	0	0	0	0	0	0	0	0	0	0	0	0	0	13	0	0	0	0	0	13	0	0	0	0	0	0	0	0	0
6fb989245d350bad0edaa20ee745ff09	0	0	0	0	0	0	0	0	0	0	0	0	0	0	0	0	0	0	0	0	0	0	0	0	0	0	0	0	0	0	0	0	0	0	0	0	0	0	0	0	0	0	0	0	0	0	0	0	0
0e7ac15769d34636088008dd636367f7	0	0	0	0	0	0	0	0	0	0	0	0	0	0	0	0	0	0	0	0	0	0	0	0	0	0	0	0	0	0	16	0	0	0	0	0	0	0	0	16	0	0	0	0	0	0	0	0	0
b6611fdf6f5b834cdbe7701e9578ab8d	0	0	0	0	0	42	0	0	0	42	0	0	0	0	0	0	0	0	0	0	0	0	0	0	0	0	0	0	0	0	0	0	0	0	0	0	0	0	0	0	0	0	0	0	0	0	0	0	0
0fac83ebdaa3963cb34a6f748fe03a2f	0	0	0	0	0	0	8	0	0	8	0	0	0	0	0	0	0	0	0	0	0	0	0	0	0	0	0	0	0	0	0	0	0	0	0	0	0	0	0	0	0	0	0	0	0	0	0	0	0
6f0903d1e62e75d20cfebc06ed1f91b9	0	0	0	0	0	0	0	0	42	42	0	0	0	0	0	0	0	0	0	0	0	0	0	0	0	0	0	0	0	0	0	0	0	0	0	0	0	0	0	0	0	0	0	0	0	0	0	0	0
2c334e12d288f5e1611b86e4f57a2354	0	0	0	0	0	0	0	0	0	0	0	0	0	0	0	0	0	0	0	0	0	0	0	0	0	0	0	0	0	0	0	0	0	0	0	0	0	0	0	0	0	0	0	0	0	0	0	0	0
09f5ea0b19584aaed7fd23e2165f36a0	0	0	0	0	0	0	0	0	0	0	0	0	0	0	0	0	0	0	0	0	0	0	0	0	0	0	0	0	0	0	0	0	0	0	0	0	0	0	0	0	0	0	0	0	0	0	0	0	0
9c5f79645a5de5c5e2663dc4b42343e2	0	0	0	0	0	0	0	0	0	0	0	0	0	0	0	0	0	0	0	0	0	0	0	0	0	0	0	0	0	0	0	0	0	0	0	0	0	0	0	0	0	0	0	0	0	0	0	0	0
2d5a2c8e02d2a8a105ff4102a2d67fe4	0	0	0	0	0	0	0	0	0	0	0	0	0	0	0	0	0	0	0	0	0	0	0	0	0	0	0	0	0	0	0	0	0	0	0	0	0	0	0	0	0	0	0	0	0	0	0	0	0
3eb766e9108f00260f81dfa22487cdc1	0	0	0	0	0	0	0	0	0	0	0	0	0	0	0	0	0	0	0	0	0	0	0	0	0	0	0	0	0	0	0	0	0	0	0	0	0	0	0	0	0	0	0	0	0	0	0	0	0
d1f8449ab18095314a786a529d0b30bd	0	0	0	0	0	0	0	0	0	0	0	0	0	0	0	0	0	0	0	0	0	0	0	0	0	0	0	0	0	0	0	0	0	0	0	0	0	0	0	0	0	0	0	0	0	0	0	0	0
c7f64c1eae538f07d817129ded37ab2d	0	0	0	0	0	0	0	0	0	0	0	0	0	0	0	0	0	0	0	0	0	0	0	0	0	0	0	0	0	0	0	0	0	0	0	0	0	0	0	0	0	0	0	0	0	0	0	0	0
73b95d911234dc1814261fbffcb6ead8	0	0	0	0	0	0	0	0	0	0	0	0	0	0	0	0	0	0	0	0	0	0	0	0	0	0	0	0	0	0	0	0	0	0	0	0	0	0	0	0	0	0	0	0	0	0	0	0	0
9c8a5eb25297af3057e20346a5983f70	0	0	0	0	0	0	0	0	0	0	0	0	0	0	0	0	0	0	0	0	0	0	0	0	0	0	0	0	0	0	0	0	0	0	0	0	0	0	0	0	0	0	0	0	0	0	0	0	0
3ca891492c53fe78fba321442b851bde	0	0	0	0	0	0	0	0	0	0	0	0	0	0	0	0	0	0	0	0	0	0	0	0	0	0	0	0	0	0	0	0	0	0	0	0	0	0	0	0	0	0	0	0	0	0	0	0	0
d43fe5043a2240cc7aede663747cbffb	0	0	0	0	0	0	0	0	0	0	4	0	0	0	0	0	0	0	0	4	0	0	0	0	0	0	0	0	0	0	0	0	0	0	0	0	0	0	0	0	0	0	0	0	0	0	0	0	0
a0b8cbc33d2e403bd52cc85cc1f197b4	0	0	0	0	10	0	0	0	0	10	0	0	0	0	0	0	0	0	0	0	0	0	0	0	0	0	0	0	0	0	0	0	0	0	0	0	12	0	0	12	0	0	0	0	0	0	0	0	0
7127f7bb5cdf6881cc1c335736ef67ca	0	0	0	0	0	0	0	0	0	0	0	0	0	0	0	0	0	0	0	0	0	0	0	0	0	0	0	0	0	0	0	0	0	0	0	0	0	0	0	0	0	0	0	0	0	0	0	0	0
29ffc4b50bdd828f05d6900f7e920226	0	0	0	0	0	0	0	0	0	0	0	0	0	0	0	0	0	0	0	0	0	0	0	0	41	0	0	0	0	41	0	0	0	0	0	0	0	0	0	0	0	0	0	0	0	0	0	0	0
b82edee8bcf7be3d4bf007380806dd02	0	0	0	0	0	22	0	0	0	22	0	0	0	0	0	0	0	0	0	0	0	0	0	0	0	0	0	0	0	0	0	0	0	0	0	0	0	0	0	0	0	0	0	0	0	0	0	0	0
40be2358f08160b57e0a95f27f16ad06	0	0	0	0	0	0	0	0	0	0	0	0	0	0	0	0	0	0	0	0	0	0	0	0	0	0	0	0	0	0	0	0	0	0	0	0	0	0	0	0	0	0	0	0	0	0	0	0	0
3d0f5514dec6f80df5586820b28d3973	0	0	0	0	0	0	0	0	0	0	0	0	0	0	0	0	0	0	0	0	0	0	0	0	0	0	0	0	0	0	0	0	0	0	0	0	0	0	0	0	0	0	0	0	0	0	0	0	0
3e218a0dfd068090172bfd2f0a2c8927	0	0	0	0	0	0	0	0	0	0	0	0	0	0	0	0	0	0	0	0	0	0	0	0	0	0	0	0	0	0	0	0	0	0	0	0	0	0	0	0	0	0	0	0	0	0	0	0	0
afbfc17f9f8024de868ed82730932572	0	0	0	0	0	0	0	0	0	0	0	0	0	0	0	0	0	0	0	0	0	0	0	0	0	0	0	0	0	0	0	0	0	0	0	0	0	0	0	0	0	0	0	0	0	0	0	0	0
362f56e06e28e2d010a631a89ba21681	0	0	0	0	0	0	0	0	0	0	0	0	0	0	0	0	0	0	0	0	0	0	0	0	0	0	0	0	0	0	0	0	0	0	0	0	0	0	0	0	0	0	0	0	0	0	0	0	0
39ea9285d853ce028e2722f54b8073f2	0	0	0	0	0	0	0	0	0	0	0	0	0	0	0	0	0	0	0	0	0	0	0	0	0	0	0	0	0	0	0	0	0	0	0	0	0	0	0	0	0	0	0	0	0	0	0	0	0
a31b30047074336443b2d804e602dba9	0	0	0	0	0	0	0	0	0	0	0	0	0	0	0	0	0	0	0	0	0	0	0	0	0	0	0	0	0	0	0	0	0	0	0	0	0	0	0	0	0	0	0	0	0	0	0	0	0
e2ccdac8c45bbed41fa5619250ab260e	0	0	0	0	0	0	0	0	0	0	0	0	0	0	0	0	0	0	0	0	0	0	0	0	0	0	0	0	0	0	0	0	0	0	0	0	0	0	0	0	0	0	0	0	0	0	0	0	0
e2c77613de3e1ffe701bdb28417ee259	0	0	0	0	0	0	0	0	0	0	0	0	0	0	0	0	0	0	0	0	0	0	0	0	0	0	0	0	0	0	0	0	0	0	0	0	0	0	0	0	0	0	0	0	0	0	0	0	0
475119a3ea15e0aea8bf37c960f65615	0	0	0	0	0	0	0	0	0	0	0	0	0	0	0	0	0	0	0	0	0	0	0	0	0	0	0	0	0	0	0	0	0	0	0	0	0	0	0	0	0	0	0	0	0	0	0	0	0
c7c58743486150ad5d3ac31b66273c58	0	0	0	0	0	0	0	0	0	0	0	0	0	0	0	0	0	0	0	0	0	2	0	0	0	0	0	0	0	2	0	0	0	0	0	0	0	0	0	0	0	0	0	0	0	0	0	0	0
0277e000ea57c843a3acceb564c1a656	0	0	0	0	0	0	0	0	0	0	0	0	0	0	0	0	0	0	0	0	0	0	0	0	40	0	0	0	0	40	0	0	0	0	0	0	0	0	0	0	0	0	0	0	0	0	0	0	0
0109f8306f61f1649c08f1a46263dc5d	0	0	0	0	0	0	0	0	0	0	0	0	0	0	0	0	0	0	0	0	0	0	0	0	36	0	0	0	0	36	0	0	0	0	0	0	0	0	0	0	0	0	0	0	0	0	0	0	0
18ebab139851908f4a46a7738d64e4ad	0	0	0	0	0	0	0	0	0	0	0	0	0	0	0	0	0	0	0	0	0	0	0	0	28	0	0	0	0	28	0	0	0	0	0	0	0	0	0	0	0	0	0	0	0	0	0	0	0
067fe65268940eac9be87cb547d6a7ca	0	0	0	8	0	0	0	0	0	8	0	0	0	0	0	0	0	0	0	0	0	0	0	0	0	0	0	4	0	4	0	0	0	0	0	0	0	0	0	0	0	0	0	0	0	0	0	0	0
8480684c7e4d7de5a13efe924b1ca71e	0	0	0	0	0	10	0	0	0	10	0	0	0	0	0	0	0	0	0	0	0	0	0	0	0	0	0	0	0	0	0	0	0	0	0	0	0	0	0	0	0	0	0	0	0	0	0	0	0
7fc8dbf32db173332aa4ddeff315da68	0	0	0	0	0	0	0	0	40	40	0	0	0	0	0	0	0	0	0	0	0	0	0	0	0	0	0	0	0	0	0	0	0	0	0	0	0	0	0	0	0	0	0	0	0	0	0	0	0
6d30ed7bb90d527d4935a22a49598cee	0	0	0	0	0	0	0	0	0	0	0	0	0	0	0	0	0	0	0	0	0	0	0	0	0	0	0	0	0	0	0	0	0	0	0	0	0	0	0	0	0	0	0	0	0	0	0	0	0
70162aeb4df740b9195440b0aecc84ae	0	0	0	0	0	0	0	0	0	0	0	0	0	0	0	0	0	0	0	0	0	0	0	0	0	0	0	0	0	0	0	0	0	0	0	0	0	0	0	0	0	0	0	0	0	0	0	0	0
e66ad11bee3b7c113b96e464cdf90530	0	0	0	0	0	0	0	0	0	0	0	0	0	0	0	0	0	0	0	0	0	0	0	0	0	0	0	0	0	0	0	0	0	0	0	0	0	0	0	0	0	0	0	0	0	0	0	0	0
c194ce9b4d0bcdc1daa20d43a0ff2b55	0	0	0	0	0	0	0	0	0	0	0	0	0	0	0	0	0	0	0	0	0	0	0	0	0	0	0	0	0	0	0	0	0	0	0	0	0	0	0	0	0	0	0	0	0	0	0	0	0
38215737504d4d93de15b8c1b4261284	0	0	0	0	0	0	0	0	0	0	0	0	0	0	0	0	0	0	0	0	0	0	0	0	0	0	0	0	0	0	0	0	0	0	0	0	0	0	0	0	0	0	0	0	0	0	0	0	0
5d6f1b4d8553567d6e0f3eb604111d16	0	0	0	0	0	0	0	0	0	0	0	0	0	0	0	0	0	0	0	0	0	0	0	0	0	0	0	0	0	0	0	0	0	0	0	0	0	0	0	0	0	0	0	0	0	0	0	0	0
419e2196de4ef692f970c23114f09fa3	0	0	0	0	0	0	0	0	0	0	0	0	0	0	0	0	0	0	0	0	0	0	0	0	0	0	0	0	0	0	0	0	0	0	0	0	0	0	0	0	0	0	0	0	0	0	0	0	0
fadcda72a497778353923508d20c9816	0	0	0	0	0	0	0	0	0	0	0	0	7	0	0	0	0	0	0	7	0	0	0	0	0	0	0	0	0	0	0	0	0	0	0	0	0	0	0	0	0	0	0	0	0	0	0	0	0
72cdedc70d0e3565fb88879dc8d6a4a9	0	0	0	0	0	0	0	0	0	0	0	0	0	0	0	0	0	0	0	0	0	0	0	0	0	0	0	0	0	0	0	0	0	0	0	0	0	0	0	0	0	0	0	0	0	0	0	0	0
6196011522762b931742ce259fe87a4a	0	0	0	0	10	0	0	8	3	21	0	0	0	0	0	0	0	11	0	11	0	0	0	0	0	0	0	3	0	3	0	0	0	0	0	0	0	0	0	0	0	0	0	0	0	0	0	0	0
3983a9624311bb9995af9a720812c638	0	0	0	0	0	0	0	0	0	0	0	0	0	0	0	0	0	0	0	0	0	0	0	0	0	0	0	0	0	0	0	0	0	13	0	0	0	0	10	23	0	0	0	0	0	0	0	0	0
8c38f131a4e71b0731cf120e2f2bd36c	0	0	0	7	0	0	0	0	0	7	0	0	0	0	0	0	0	0	0	0	0	0	0	0	0	9	0	0	0	9	0	0	0	0	0	0	0	0	0	0	0	0	0	0	0	0	0	0	0
b298a856614ce0c596074a68eea92945	0	0	0	9	0	0	0	0	0	9	0	0	0	0	0	0	0	0	0	0	0	0	0	0	0	0	0	0	0	0	0	0	0	0	0	0	0	0	0	0	0	0	0	0	0	0	0	0	0
4ebb54b05097df56b270993b2321b053	0	0	0	0	0	0	0	0	0	0	0	0	0	0	0	0	0	0	0	0	0	0	0	0	0	0	0	0	0	0	0	0	0	0	0	0	0	0	0	0	0	0	0	0	0	0	0	0	0
f8871db2e7198b0228785f01227df785	0	0	0	0	0	0	0	0	0	0	0	0	0	0	0	0	0	0	0	0	0	0	0	0	0	0	0	0	0	0	0	0	0	0	0	0	0	0	0	0	0	0	0	0	0	0	0	0	0
aabf4039f35935a0b1a2e714daff3be1	0	0	0	0	0	0	0	0	0	0	0	0	0	0	0	0	0	0	0	0	0	0	0	0	0	0	0	0	0	0	0	0	0	0	0	0	0	0	0	0	0	0	0	0	0	0	0	0	0
be2ba6af4a556ca033756c4f351ea2cb	0	0	0	0	0	0	0	0	0	0	0	0	0	0	0	0	0	0	0	0	0	0	0	0	0	0	0	0	0	0	0	0	0	0	0	0	0	0	0	0	0	0	0	0	0	0	0	0	0
df186640d7a9b997d4f35cd964c07950	0	0	0	0	0	0	0	0	0	0	0	0	0	0	0	0	0	0	0	0	0	0	0	0	0	0	0	0	0	0	0	0	0	0	0	0	0	0	0	0	0	0	0	0	0	0	0	0	0
ddb6c83ff085d8fed6a78b3c54930ca7	0	0	0	0	0	0	0	0	0	0	0	0	0	0	0	0	0	0	0	0	0	0	0	0	0	0	0	0	0	0	0	0	0	0	0	0	0	0	0	0	0	0	0	0	0	0	0	0	0
d04688cb65b8b85a5ddfd4180e689003	0	0	0	0	0	0	0	0	0	0	0	0	0	0	0	0	0	0	0	0	0	0	0	0	0	0	0	0	0	0	0	0	0	0	0	0	0	0	0	0	0	0	0	0	0	0	0	0	0
98e8df24d90915f7a22c2f27e62d48d6	0	0	0	0	0	0	0	0	0	0	0	0	0	0	0	0	0	0	0	0	0	0	0	0	0	0	0	0	0	0	0	0	0	0	0	0	0	0	0	0	0	0	0	0	0	0	0	0	0
21a61a43f60e367ce0f0724142c8a997	0	0	0	0	0	0	0	0	0	0	0	0	0	0	0	0	0	0	0	0	0	0	0	0	0	0	0	0	0	0	0	0	0	0	0	0	0	0	0	0	0	0	0	0	0	0	0	0	0
9595df8a510dede97e5398e8a7d35afd	0	0	0	0	0	0	0	0	0	0	0	0	0	0	0	0	0	0	0	0	0	0	0	0	0	0	0	0	0	0	0	0	0	0	0	0	0	0	0	0	0	0	0	0	0	0	0	0	0
c787ca279ca2b20f3ff30a294b1770aa	0	0	0	0	0	0	0	0	0	0	0	0	0	0	0	0	0	0	0	0	0	0	0	0	0	0	0	0	0	0	0	0	0	0	0	0	0	0	0	0	0	0	0	0	0	0	0	0	0
4e2aac56ff1d34a7fcbb9342a05fd187	0	0	0	0	0	0	0	0	0	0	0	0	0	0	0	0	0	0	0	0	0	0	0	0	0	0	0	0	0	0	0	0	0	0	0	0	0	0	0	0	0	0	0	0	0	0	0	0	0
933c985dedea42d15838196fc1ca02cc	0	0	0	0	0	0	0	0	0	0	0	0	0	0	0	0	0	0	0	0	0	0	0	0	0	0	0	0	0	0	12	0	0	0	0	0	0	0	0	12	0	0	0	0	0	0	0	0	0
3746e0e1ab814cc905441593f1625e41	0	4	0	0	0	0	0	0	0	4	0	0	0	0	0	0	0	0	0	0	0	0	0	0	0	0	0	0	0	0	0	0	0	0	9	0	0	0	0	9	0	0	0	0	0	0	0	5	0
28b2b8674f6d7bba52ac779167591821	0	0	0	0	0	0	0	0	0	0	0	0	0	0	0	0	0	0	0	0	0	0	0	0	32	0	0	0	0	32	0	0	0	0	0	0	0	0	0	0	0	0	0	6	0	0	0	0	0
66cb10688987773e36be31b76acbb716	0	0	0	0	0	0	0	0	0	0	0	4	0	0	0	0	0	0	0	4	0	0	0	0	0	0	0	0	0	0	5	0	0	0	0	0	0	0	0	5	0	0	0	0	0	0	0	0	0
16ddaa46310ee36613d86e60bf562bc3	0	0	0	0	0	0	0	0	0	0	0	0	0	0	0	0	0	0	0	0	0	0	0	0	0	0	0	0	0	0	0	0	0	0	0	0	0	0	0	0	0	0	0	0	0	0	0	0	0
d89387d21050a665b2a463eb95feac14	0	0	0	0	21	0	0	0	0	21	0	0	0	0	0	0	0	0	0	0	0	0	0	0	0	0	0	0	0	0	0	0	0	0	0	0	0	0	0	0	0	0	0	0	0	0	0	0	0
a7b0a972b50db987b9109bb7cf2ffa74	0	0	0	0	0	0	0	0	0	0	0	0	0	0	0	0	0	0	0	0	0	0	0	3	0	9	0	0	0	12	0	0	0	0	0	0	0	0	0	0	0	0	0	0	0	0	0	0	0
d8c16bdff1f6d16e1d81e5f591a461f1	0	0	0	0	0	0	0	0	0	0	0	0	0	19	0	0	0	0	0	19	0	0	0	0	0	0	0	0	0	0	0	0	0	0	0	0	0	0	0	0	0	0	0	0	0	0	0	0	0
b73a3d4622389e6dc44e5e835de14ee6	0	0	0	0	0	0	0	0	0	0	0	0	0	0	0	0	32	0	0	32	0	0	0	0	0	0	0	0	0	0	0	0	0	0	0	0	0	0	0	0	0	0	0	0	0	0	0	0	0
0ecd4a23df53fba00dae763d2079f573	0	0	0	0	18	0	0	0	14	32	0	0	0	0	0	0	0	0	6	6	0	0	0	0	0	0	0	0	0	0	0	0	0	0	0	0	0	0	0	0	0	0	0	0	0	0	0	0	0
56b0b8763470d7e78f8de9e115a7486b	0	0	0	0	0	0	0	0	0	0	0	0	0	0	0	0	0	0	0	0	0	0	0	0	0	0	0	0	0	0	0	0	0	0	0	0	0	0	0	0	0	0	0	0	0	0	0	0	0
1b1f6e50f8e53e319c937fa5210712eb	0	0	0	0	0	0	0	0	0	0	0	0	0	0	0	0	0	0	0	0	0	0	0	0	0	0	0	0	0	0	0	0	0	0	0	0	21	0	0	21	0	0	0	0	0	0	0	0	0
ae15f077719ffea475b4b27780845f6e	0	0	0	0	0	0	0	0	0	0	0	0	0	0	0	0	0	0	0	0	0	0	0	0	0	0	0	0	0	0	0	0	0	0	0	0	0	0	0	0	0	0	0	0	0	0	0	0	0
052493335184d046973e7ca962f24570	0	0	0	0	0	0	0	0	0	0	0	0	0	0	0	0	0	0	0	0	0	0	0	0	0	0	0	0	0	0	0	0	0	0	0	0	0	0	0	0	0	0	0	0	0	0	0	0	0
7b598f115d010f25b06d347b266a92d9	0	0	0	0	0	0	0	0	0	0	0	0	0	0	0	0	0	0	0	0	0	0	0	0	0	0	0	0	0	0	0	0	0	0	0	0	0	0	0	0	0	0	0	0	0	0	0	0	0
c7b05766c6e97dbd7c459635192ad7ca	0	0	0	0	0	0	0	0	0	0	0	0	0	0	0	0	0	0	0	0	0	0	0	0	0	0	0	0	0	0	0	0	0	0	0	0	0	0	0	0	0	0	0	0	0	0	0	0	0
2555c506a6554f4852bda9f46cc9d448	0	0	0	0	0	0	0	0	0	0	0	0	0	0	0	0	0	0	0	0	0	0	0	0	0	0	0	0	0	0	0	0	0	0	0	0	0	0	0	0	0	0	0	0	0	0	0	0	0
3504b3122aa62a0034ada1731271c682	0	0	0	0	0	0	0	0	0	0	0	0	0	0	0	0	0	0	0	0	0	0	0	0	0	0	0	0	0	0	0	0	0	0	0	0	0	0	0	0	0	0	0	0	0	0	0	0	0
7535fbdeb407f307c266d051378b78c9	0	0	0	0	0	0	0	0	0	0	0	0	0	0	0	0	0	0	0	0	0	0	0	0	0	0	0	0	0	0	0	0	0	0	0	0	0	0	0	0	0	0	0	0	0	0	0	0	0
8cec6eb35d190bdef26617c99ee2afc8	0	0	0	0	0	0	0	0	0	0	0	0	0	0	0	0	0	0	0	0	0	0	0	0	0	0	0	0	0	0	0	0	0	0	0	0	0	0	0	0	0	0	0	0	0	0	0	0	0
e4935fb12e5e961e9953f12a7f8d7418	0	0	0	0	0	0	0	0	0	0	0	0	0	0	0	0	0	0	0	0	0	0	0	0	0	0	0	0	0	0	0	0	0	0	0	0	0	0	0	0	0	0	0	0	0	0	0	0	0
84482ebf36050d7cadc588c6b2c6cfc7	0	0	0	0	0	0	0	0	0	0	0	0	0	0	0	0	0	0	0	0	0	0	0	0	0	0	0	0	0	0	0	0	0	0	0	0	0	0	0	0	0	0	0	0	0	0	0	0	0
11d216f69fadbbd42fe6c37695b6dc1e	0	0	0	0	0	0	0	0	0	0	0	0	0	0	0	0	0	0	0	0	0	0	0	0	0	0	0	0	0	0	0	0	0	0	0	0	0	0	0	0	0	0	0	0	0	0	0	0	0
4fd33cd01d872e81bca161079d5f83c1	0	0	0	0	0	0	0	0	0	0	0	0	0	0	0	0	0	0	0	0	0	0	0	0	0	0	0	0	0	0	0	0	0	0	0	0	0	0	0	0	0	0	0	0	0	0	0	0	0
13033c9f7fed7f7acf95d449ab94547f	0	0	0	0	0	0	19	0	0	19	0	0	0	0	0	0	0	0	0	0	0	0	0	0	0	0	0	0	0	0	0	0	0	0	0	0	0	0	0	0	0	0	0	0	0	0	0	0	0
384863bd8b6612fc8adb40190e8ed146	0	0	0	0	0	0	0	0	0	0	0	0	0	0	0	0	0	0	0	0	0	0	0	0	0	0	0	0	0	0	25	0	0	0	0	0	0	0	0	25	0	0	0	0	0	0	0	0	0
34e7ec7697f8cd1ef590f152241965df	0	0	0	0	0	0	0	0	0	0	0	0	0	0	0	0	0	0	0	0	0	0	0	0	0	0	0	0	0	0	0	37	0	0	0	0	0	0	0	37	0	0	0	0	0	0	0	0	0
076266abdb426dceafbfaab2f3da57dc	29	0	0	0	0	0	0	0	0	29	0	0	0	0	0	0	0	0	0	0	0	0	0	0	0	0	0	0	0	0	0	0	0	0	0	0	0	0	0	0	0	0	0	0	0	0	0	0	0
9f03992c2963d9220d87d4402645fe2b	0	0	0	0	0	0	0	0	0	0	0	0	0	0	0	0	0	0	0	0	0	0	0	0	0	0	0	0	0	0	0	0	0	0	0	0	0	0	0	0	0	0	0	0	0	0	0	0	0
7a415c9121721289656a1391212d3250	0	0	0	0	0	0	0	0	0	0	0	0	0	0	0	0	0	0	0	0	0	0	0	0	0	0	0	0	0	0	0	0	0	0	0	0	0	0	0	0	0	0	0	0	0	0	0	0	0
d1efb766a0a07e2b5d0e2d005279d58a	0	0	0	0	0	0	0	0	0	0	0	0	0	0	0	0	0	0	0	0	0	0	0	0	0	0	0	0	0	0	0	0	0	0	0	0	0	0	0	0	0	0	0	0	0	0	0	0	0
48fcc63059a68b1b5bf76c7159c547dc	0	0	0	0	0	0	0	0	0	0	0	0	0	0	0	0	0	0	0	0	0	0	0	0	0	0	0	0	0	0	0	0	0	0	0	0	0	0	0	0	0	0	0	0	0	0	0	0	0
303493027e5cffe2420c839569c13c0e	0	0	0	0	0	0	0	0	0	0	0	0	0	0	0	0	0	0	0	0	0	0	0	0	0	0	0	0	0	0	0	0	0	0	0	0	0	0	0	0	0	0	0	0	0	0	0	0	0
25953dc32d0121e4351f15fc5a8cbf29	0	0	0	0	0	0	0	0	0	0	0	0	0	0	0	0	0	0	0	0	0	0	0	0	0	0	0	0	0	0	0	0	0	0	0	0	0	0	0	0	0	0	0	0	0	0	0	0	0
3a9ef057f042b07dc0e0fbc865dffe59	0	0	0	0	0	0	0	0	0	0	0	0	0	0	0	0	0	0	0	0	0	0	0	0	0	0	0	0	0	0	0	0	0	0	0	0	0	0	0	0	0	0	0	0	0	0	0	0	0
b17bc2eb8b2715ed03c1a3e599b1dcf1	0	0	0	0	0	0	0	0	0	0	0	0	0	0	0	0	0	0	0	0	0	0	0	0	0	0	0	0	0	0	0	0	0	0	0	0	0	0	0	0	0	0	0	0	0	0	0	0	0
db8d6420c2af5211916880984923487f	0	0	0	0	0	0	0	0	0	0	0	0	0	0	0	0	0	0	0	0	0	0	0	0	0	0	0	0	0	0	0	0	0	0	0	0	0	0	0	0	0	0	0	0	0	0	0	0	0
f7d6edf8210fffd13dbdd180ef90c224	0	0	0	0	0	0	0	0	0	0	0	0	0	0	0	0	0	0	0	0	0	0	0	0	0	0	0	0	0	0	0	0	0	0	0	0	0	0	0	0	0	0	0	0	0	0	0	0	0
68dde03a38f1aafbcd82f79763ad696c	0	0	0	0	0	0	0	0	0	0	0	0	0	0	0	0	0	0	0	0	0	0	0	0	0	0	0	0	0	0	0	0	0	0	0	0	0	0	0	0	0	0	0	0	0	0	0	0	0
40c01e1d47af255409e2939be943908b	0	0	0	0	0	0	0	0	0	0	0	0	0	0	0	0	0	0	0	0	0	0	0	0	0	0	0	0	0	0	0	0	0	0	0	0	0	0	0	0	0	0	0	0	0	0	0	0	0
38cafde37a233d3ca51f45f2b89b8442	0	0	0	0	0	0	0	0	0	0	0	0	0	0	0	0	0	0	0	0	0	0	0	0	0	0	0	0	0	0	0	0	0	0	0	0	0	0	0	0	0	0	0	0	0	0	0	0	0
364e379fda887cceea25860233434dbd	0	0	0	0	0	0	0	0	0	0	0	0	0	0	0	0	0	0	0	0	0	0	0	0	0	0	0	0	0	0	0	0	0	0	0	0	0	0	0	0	0	0	0	0	0	0	0	0	0
892d38539170e5a8844fcfe011aac2c1	0	0	0	0	0	0	0	0	0	0	0	0	0	0	0	0	0	0	0	0	0	0	0	0	0	0	0	0	0	0	0	0	0	0	0	0	0	0	0	0	0	0	0	0	0	0	0	0	0
e3951572d758dc8cde987f537b5db7ca	0	0	0	0	0	0	0	0	0	0	0	0	0	0	0	0	0	0	0	0	0	0	0	0	0	0	0	0	0	0	0	0	0	0	0	0	0	0	0	0	0	0	0	0	0	0	0	0	0
24cc33aae84d6ebd7937e2f690aa88ee	0	0	0	0	0	0	0	0	0	0	0	0	0	0	0	0	0	0	0	0	0	0	0	0	0	0	0	0	0	0	0	0	0	0	0	0	0	0	0	0	0	0	0	0	0	0	0	0	0
c8b4f63c627d7078bb6cc41bf88c6884	0	0	0	0	0	0	0	0	0	0	3	0	4	0	0	0	0	0	0	7	0	0	0	0	0	0	0	0	0	0	0	0	4	0	0	0	0	0	0	4	3	0	0	0	0	0	0	0	0
855332d595579b1006b8f187262c4dd1	0	0	0	0	0	0	0	0	0	0	0	0	0	0	0	0	4	0	0	4	0	0	0	0	0	0	0	0	0	0	0	0	0	0	0	0	0	0	0	0	0	0	5	0	0	0	0	0	0
c14383a14650b6e99672b58cabb4f912	5	0	0	0	0	0	0	0	0	5	0	0	0	0	0	0	0	0	0	0	0	0	0	0	0	0	0	0	0	0	0	0	0	0	0	0	7	0	0	7	0	0	0	0	0	0	0	0	0
9eeb3a89e19cbc25a1ae954c73b53fdc	0	0	0	6	11	0	0	0	0	17	0	0	0	0	0	0	0	0	0	0	0	0	5	0	0	0	0	0	0	5	0	0	0	0	0	0	0	0	0	0	0	0	0	0	0	0	0	0	0
3ad4328884de0e5c560438d56d395ede	0	0	0	0	0	0	0	0	0	0	4	0	0	0	0	0	0	0	0	4	0	0	0	0	0	4	0	0	0	4	0	0	0	0	0	0	0	0	0	0	0	0	0	0	0	0	0	0	0
97588f3409e875d56887c75e4d82cd43	0	0	0	0	0	0	0	0	0	0	0	0	0	0	0	0	0	0	0	0	0	0	0	0	0	0	0	0	0	0	14	10	0	0	0	0	0	0	0	24	0	0	0	0	0	0	0	0	0
ddb23948e174ee7a3a4176507c78fe95	0	0	2	0	0	0	0	0	0	2	0	0	0	0	0	0	0	0	0	0	0	0	0	0	0	0	0	0	0	0	0	0	0	0	0	3	0	0	0	3	0	0	0	0	0	0	0	0	0
dafd79092ebf4297f49bf9f36240902e	0	0	0	0	0	0	0	0	0	0	0	0	0	0	0	0	0	0	0	0	0	0	0	0	0	0	0	0	0	0	11	0	11	0	0	0	14	0	0	36	0	0	0	0	0	0	0	0	0
4db2e3d0f5a136f506e8af1d4524fd8e	0	0	0	0	0	0	0	0	0	0	0	0	0	0	0	0	0	0	0	0	0	0	0	0	0	0	0	0	0	0	0	0	0	0	0	0	9	0	0	9	0	0	0	0	0	0	0	0	0
7736bd57df3f7a581e93094f122a6f0b	0	0	0	0	0	22	0	0	0	22	0	0	0	0	0	0	0	0	0	0	0	0	0	0	0	0	0	0	0	0	0	0	0	0	0	0	0	0	0	0	0	0	0	0	0	0	0	0	0
a395810989a8ad1511cea9a4683dba67	0	0	0	0	0	0	0	0	0	0	0	0	0	0	0	0	0	0	0	0	0	0	0	0	0	0	0	0	0	0	0	0	0	0	0	0	0	0	0	0	0	0	0	0	0	0	0	0	0
dcab2bc2da084fdba68c0997ffc40b35	0	0	0	0	0	0	0	0	0	0	0	0	0	0	0	0	0	0	0	0	0	0	0	0	0	0	0	0	0	0	0	0	0	0	0	0	0	0	0	0	0	0	0	0	0	0	0	0	0
a65f288c770ea5a6626d42a26e0c04af	0	0	0	0	0	0	0	0	0	0	0	0	0	0	0	0	0	0	0	0	0	0	0	0	0	0	0	0	0	0	0	0	0	0	0	0	0	0	0	0	0	0	0	0	0	0	0	0	0
49ade2d14d6c04f458f7f6930b8b8d60	0	0	0	0	0	0	0	0	0	0	0	0	0	0	0	0	0	0	0	0	0	0	0	0	0	0	0	0	0	0	0	0	0	0	0	0	0	0	0	0	0	0	0	0	0	0	0	0	0
de6d76586f0787eefa00ec0f5c320d69	0	0	0	0	0	0	0	0	0	0	0	0	0	0	0	0	0	0	0	0	0	0	0	0	0	0	0	0	0	0	0	0	0	0	0	0	0	0	0	0	0	0	0	0	0	0	0	0	0
087feca87d3c3d3dac1f82152221b0ff	0	0	0	0	0	0	0	0	0	0	0	0	0	0	0	0	0	0	0	0	0	0	0	0	0	0	0	0	0	0	0	0	0	0	0	0	0	0	0	0	0	0	0	0	0	0	0	0	0
e28fbc79d682d2082e5119b50c51f454	0	0	0	0	0	0	0	0	0	0	0	0	0	0	0	0	0	0	0	0	0	0	0	0	0	0	0	0	0	0	0	0	0	0	0	0	0	0	0	0	0	0	0	0	0	0	0	0	0
41997520ed2ee7a780523d7e319277a2	0	0	0	0	0	0	0	0	0	0	0	0	0	0	0	0	0	0	0	0	0	0	0	0	0	0	0	0	0	0	0	0	0	0	0	0	0	0	0	0	0	0	0	0	0	0	0	0	0
561e1d542822605e5f7dc2a5d63c7de5	0	0	0	0	0	0	0	0	0	0	0	0	0	0	0	0	0	0	0	0	0	0	0	0	0	0	0	0	0	0	0	0	0	0	0	0	0	0	0	0	0	0	0	0	0	0	0	0	0
5711363fcd44ddbcc85c1e105d575a20	0	0	0	0	0	0	0	0	0	0	0	0	0	0	0	0	0	0	0	0	0	0	0	0	0	0	0	0	0	0	0	0	0	0	0	0	0	0	0	0	0	0	0	0	0	0	0	0	0
e103fc50476ab86837b5683a44f27875	0	0	0	0	0	0	0	0	0	0	0	0	0	0	0	0	0	0	0	0	0	0	0	0	0	0	0	0	0	0	0	0	0	0	0	0	0	0	0	0	0	0	0	0	0	0	0	0	0
5b4697ba78ff25b084509ff0bd965223	0	0	0	0	0	0	0	19	0	19	0	0	0	0	0	0	0	0	0	0	0	0	0	0	0	0	0	0	0	0	0	0	0	0	0	0	0	0	0	0	0	0	0	0	0	0	0	0	0
e5d9efc17a5527ac80696a3b055dcfee	0	0	0	0	0	0	0	0	0	0	0	0	0	0	0	0	0	0	0	0	0	0	0	0	0	0	0	0	0	0	0	0	0	0	0	0	0	0	0	0	0	0	7	0	0	0	0	0	0
f25720c94db9935491a832dd446f09f8	0	0	0	0	0	0	0	0	0	0	0	0	0	0	0	0	0	0	0	0	0	0	0	0	0	0	0	0	0	0	0	0	0	0	0	0	0	0	0	0	0	0	0	0	0	0	0	0	0
4fb0678cb2874409c22808a16432bcf7	0	0	0	0	0	0	0	0	0	0	0	0	0	0	0	0	0	0	0	0	0	0	0	0	0	0	0	0	0	0	0	0	0	0	0	0	0	0	0	0	0	0	0	0	0	0	0	0	0
b7e98286102cb1ae9060f8a6f3f23c0e	0	0	0	0	0	0	0	0	0	0	0	35	0	0	0	0	0	0	0	35	0	0	0	0	0	0	0	0	0	0	0	0	0	0	0	0	0	0	0	0	0	0	0	0	0	0	0	0	0
aeee679a9d2ab56471972c3e265777d0	0	0	0	0	0	0	0	0	0	0	0	0	25	0	0	0	0	0	0	25	0	0	0	0	0	0	0	0	0	0	0	0	0	0	0	0	0	0	0	0	0	0	0	0	0	0	0	0	0
78c4eb58a0df600da5dfc99e42c7a0d2	0	0	0	0	0	0	0	0	0	0	0	0	0	0	0	0	0	0	0	0	0	0	0	0	0	0	0	0	0	0	0	0	0	0	0	0	11	0	0	11	0	0	0	0	0	0	0	0	0
bbd8aece4ab1224c574c1d10e0a175f9	0	0	0	0	0	0	0	0	0	0	0	0	0	0	0	0	0	0	0	0	0	0	0	0	35	0	0	0	0	35	0	0	0	0	0	0	0	0	0	0	0	0	0	0	0	0	0	0	0
b4af2126e739cd1f01a0ea0eb69b8d01	0	0	0	0	0	0	0	0	0	0	0	0	0	0	0	0	0	0	0	0	0	0	0	0	0	0	0	35	0	35	0	0	0	0	0	0	0	0	0	0	0	0	0	0	0	0	0	0	0
1363b16d1e23cc868698fc9d3dbbb3ce	35	0	0	0	0	0	0	0	0	35	0	0	0	0	0	0	0	0	0	0	0	0	0	0	0	0	0	0	0	0	0	0	0	0	0	0	0	0	0	0	0	0	0	0	0	0	0	0	0
c593b2389dbdf84613a3abdadbbba9bd	0	0	0	0	0	0	0	0	0	0	0	0	0	0	0	0	0	0	0	0	0	0	0	0	0	0	0	0	0	0	0	0	0	0	0	0	0	0	0	0	0	0	0	0	0	0	0	0	0
ed169fa2cd5ca9a5d895035798ce98cd	0	0	0	0	0	0	0	0	0	0	0	0	0	0	0	0	0	0	0	0	0	0	0	0	0	0	0	0	0	0	0	0	0	0	0	0	0	0	0	0	0	0	0	0	0	0	0	0	0
ecad4c249dfd478d2c8e03f1127f5027	0	0	0	0	0	0	0	0	0	0	0	0	0	0	0	0	0	0	0	0	0	0	0	0	0	0	0	0	0	0	0	0	0	0	0	0	0	0	0	0	0	0	0	0	0	0	0	0	0
ad689a65f8ebe58157c01464df02d834	0	0	0	0	0	0	0	0	0	0	0	0	0	0	0	0	0	0	0	0	0	0	0	0	0	0	0	0	0	0	0	0	0	0	0	0	0	0	0	0	0	0	0	0	0	0	0	0	0
1b8cb0cf0a7f738f2d8e8bf30ba292e4	0	0	0	0	0	0	0	0	0	0	0	0	0	0	0	0	0	0	0	0	0	0	0	0	0	0	0	0	0	0	0	0	0	0	0	0	0	0	0	0	0	0	0	0	0	0	0	0	0
8d4835b665e35b0c2305015059f5b52d	0	0	0	0	0	0	0	0	0	0	0	0	0	0	0	0	0	0	0	0	0	0	0	0	0	0	0	0	0	0	0	0	0	0	0	0	0	0	0	0	0	0	0	0	0	0	0	0	0
75de9ff7a38f2b84b264b393efd1ba8e	0	0	0	0	0	0	0	0	0	0	0	0	0	0	0	0	0	0	0	0	0	0	0	0	0	0	0	0	0	0	0	0	0	0	0	0	0	0	0	0	0	0	0	0	0	0	0	0	0
dbfb2c24987bfbc4052b12d70ee6498f	0	0	0	0	0	0	0	0	0	0	0	0	0	0	0	0	0	0	0	0	0	0	0	0	0	0	0	0	0	0	0	0	0	0	0	0	0	0	0	0	0	0	0	0	0	0	0	0	0
a8062520779576eba57c4f2ed591df6c	0	0	0	0	0	0	0	0	0	0	0	0	0	0	0	0	0	0	0	0	0	0	0	0	0	0	0	0	0	0	0	0	0	0	0	0	0	0	0	0	0	0	0	0	0	0	0	0	0
03381fa20ffdb526460d2af1fa232ad0	0	0	0	0	0	0	0	0	0	0	0	0	0	0	0	0	0	0	0	0	0	0	0	0	0	0	0	0	0	0	0	0	0	0	0	0	0	0	0	0	0	0	0	0	0	0	0	0	0
4ba1fec8bfe45e791e422b4f3ef6678a	0	0	0	0	0	0	0	0	0	0	0	0	0	0	0	0	0	0	0	0	0	0	0	0	0	0	0	0	0	0	0	0	0	0	0	0	0	0	0	0	0	0	0	0	0	0	0	0	0
27bfc0c46fbbe3cc2b350704dce5a4e3	0	0	0	0	0	0	0	0	0	0	0	0	0	0	0	0	0	0	0	0	0	0	0	0	0	0	0	0	0	0	0	0	0	0	0	0	0	0	0	0	0	0	0	0	0	0	0	0	0
754c740613a420280e8e69ee80fee93a	0	0	0	0	0	0	0	0	0	0	0	0	0	0	0	0	0	17	0	17	0	0	0	0	0	0	0	0	0	0	0	0	0	0	0	0	0	0	0	0	0	0	0	0	0	0	0	0	0
5ae9adf42fa7a8d2806a489802545fe1	0	0	0	0	15	0	0	0	0	15	0	0	0	0	0	0	0	0	0	0	0	0	6	0	0	0	0	0	0	6	0	0	0	0	0	0	0	0	0	0	0	0	0	0	0	0	0	0	0
40539aea61f480e7d3b143856d686f78	0	0	0	0	0	0	0	0	0	0	0	0	0	0	0	0	0	0	0	0	0	0	0	0	0	0	0	0	0	0	0	0	0	0	0	0	0	0	0	0	0	0	0	0	0	0	0	0	0
22ee6804cf1f32e89b5071c28f3d560c	0	0	0	0	0	0	0	0	0	0	0	0	0	0	0	0	0	0	0	0	0	17	0	0	0	0	0	0	0	17	0	0	0	0	0	0	0	0	0	0	0	0	0	0	0	0	0	0	0
d07d80a13a5f53f20ccbd3b4364d8b8a	0	0	0	0	0	0	0	0	0	0	0	0	0	0	0	0	0	0	0	0	0	0	0	0	0	0	0	0	0	0	0	0	0	0	0	0	0	0	0	0	0	0	0	0	0	0	0	5	0
373807c32b29775718e23fa0709ac255	0	0	0	0	0	0	0	0	0	0	2	0	4	0	0	0	0	0	0	6	0	0	0	0	0	0	0	0	0	0	0	0	6	0	0	0	0	0	0	6	0	0	0	3	0	0	0	0	0
99a04f5e0d5892606661be1efbf006af	0	0	0	0	0	0	0	0	0	0	0	0	0	0	0	34	0	0	0	34	0	0	0	0	0	0	0	0	0	0	0	0	0	0	0	0	0	0	0	0	0	0	0	0	0	0	0	0	0
7db8d29b21157e4cac883d89b7732c40	0	0	0	0	0	0	0	0	0	0	0	0	0	0	0	0	0	0	0	0	0	0	0	0	0	0	0	0	0	0	12	0	0	0	0	0	0	0	0	12	0	0	0	0	0	0	0	0	0
227dbcb1d5ba89232a58bbf5b2c64e1d	16	0	0	0	0	0	0	0	0	16	0	0	0	0	0	0	0	0	0	0	0	0	0	0	0	0	0	0	0	0	0	0	0	0	0	0	0	0	0	0	0	0	0	0	0	0	0	0	0
a2ac171a7b318477f5a83ee8b96ed72a	0	0	0	4	0	0	0	0	0	4	0	0	0	0	0	0	0	0	0	0	0	0	0	0	0	0	0	0	0	0	0	0	0	0	0	0	0	0	0	0	0	0	0	0	0	0	0	0	0
cc38e95d31a81e91cffc1ad41c0fa36d	0	0	0	0	0	0	0	0	34	34	0	0	0	0	0	0	0	0	0	0	0	0	0	0	0	0	0	0	0	0	0	0	0	0	0	0	0	0	0	0	0	0	0	0	0	0	0	0	0
ec14d5dbcf205a185fabc77cc962ef93	0	0	0	0	0	0	0	0	0	0	0	0	0	0	0	0	0	0	0	0	0	0	0	0	0	0	0	0	0	0	0	0	0	0	0	0	0	0	0	0	0	0	0	0	0	0	0	0	0
77be1400f23ad35b5b524109bd7a2b01	0	0	0	0	0	0	0	0	0	0	0	0	0	0	0	0	0	0	0	0	0	0	0	0	0	0	0	0	0	0	0	0	0	0	0	0	0	0	0	0	0	0	0	0	0	0	0	0	0
d861e3eee1a880cbe869ebd2654737f5	0	0	0	0	0	0	0	0	0	0	0	0	0	0	0	0	0	0	0	0	0	0	0	0	0	0	0	0	0	0	0	0	0	0	0	0	0	0	0	0	0	0	0	0	0	0	0	0	0
85145e015d011d4853a0dd7aec3bfd33	0	0	0	0	0	0	0	0	0	0	0	0	0	0	0	0	0	0	0	0	0	0	0	0	0	0	0	0	0	0	0	0	0	0	0	0	0	0	0	0	0	0	0	0	0	0	0	0	0
34a23e3868e73676ff8ff36305affd89	0	0	0	0	0	0	0	0	0	0	0	0	0	0	0	0	0	0	0	0	0	0	0	0	0	0	0	0	0	0	0	0	0	0	0	0	0	0	0	0	0	0	0	0	0	0	0	0	0
f86f2ba386d42b19b7fcfa25dbaf889f	0	0	0	0	0	0	0	0	0	0	0	0	0	0	0	0	0	0	0	0	0	0	0	0	0	0	0	0	0	0	0	0	0	0	0	0	0	0	0	0	0	0	0	0	0	0	0	0	0
3bba9b02273af8d16284fae4731256ee	0	0	0	0	0	0	0	0	0	0	0	0	0	0	0	0	0	0	0	0	0	0	0	0	0	0	0	0	0	0	0	0	0	0	0	0	0	0	0	0	0	0	0	0	0	0	0	0	0
079a8dbd7d233406898587317de166e2	0	0	0	0	0	0	0	0	0	0	0	0	0	0	0	0	0	0	0	0	0	0	0	0	0	0	0	0	0	0	0	0	0	0	0	0	0	0	0	0	0	0	0	0	0	0	0	0	0
e46fa927c38fcd676b3e655c28c70e54	0	0	0	0	0	0	0	0	0	0	0	0	0	0	0	0	0	0	0	0	0	0	0	0	0	0	0	0	0	0	0	0	0	0	0	0	0	0	0	0	0	0	0	0	0	0	0	0	0
2a16058342b3d3645627b316445d55f5	0	0	0	0	0	0	0	0	0	0	0	0	0	0	0	0	0	0	0	0	0	0	0	0	0	0	0	0	0	0	0	0	0	0	0	0	0	0	0	0	0	0	0	0	0	0	0	0	0
9d9fe9a2f7b408975fb7b482f27efd64	0	0	0	0	0	0	0	0	0	0	0	0	0	0	0	0	0	0	0	0	0	0	0	0	0	0	0	0	0	0	0	0	0	0	0	0	0	0	0	0	0	0	0	0	0	0	0	0	0
0f4514ab76aaf280cf97368ddaa16570	0	0	0	0	0	0	0	0	0	0	0	0	0	0	0	0	0	0	0	0	0	0	0	0	0	0	0	0	0	0	0	0	0	0	0	0	0	0	0	0	0	0	0	0	0	0	0	0	0
af3bd383cef5f72b11c4a88edf2511de	0	0	0	0	0	0	0	0	0	0	0	0	0	0	0	0	0	0	0	0	0	0	0	0	0	0	0	0	0	0	0	0	0	0	0	0	0	0	0	0	0	0	0	0	0	0	0	0	0
73781e7add8ea3c3880c871ea41a2f6f	0	0	0	0	0	0	0	0	0	0	0	0	0	0	0	0	0	0	0	0	0	0	0	0	0	0	0	0	0	0	0	0	0	0	0	0	0	0	0	0	0	0	0	0	0	0	0	0	0
0a1f8cef9383efcadbd56c3fbd3e2952	0	0	0	0	0	0	0	0	0	0	0	0	0	0	0	0	0	0	0	0	0	0	0	0	0	0	0	0	0	0	0	0	0	0	0	0	0	0	0	0	0	0	0	0	0	0	0	0	0
d0791657a61e1d9668eeb5822d2f0b38	0	0	0	0	0	0	0	0	0	0	0	0	0	0	0	0	0	0	0	0	0	0	0	0	0	0	0	0	0	0	0	0	0	0	0	0	0	0	0	0	0	0	0	0	0	0	0	0	0
52c1bb3deccedcd3711f41ede8161b56	0	0	0	0	0	0	0	0	0	0	0	0	0	0	0	0	0	0	0	0	0	0	0	0	0	0	0	0	0	0	0	0	0	0	0	0	0	0	0	0	0	0	0	0	0	0	0	0	0
2d1271b88395fdf5bce4a90a4703d578	0	0	0	0	0	0	0	0	0	0	0	0	0	0	0	0	0	0	0	0	0	0	0	0	0	0	0	0	0	0	0	0	0	0	0	0	0	0	0	0	0	0	0	0	0	0	0	0	0
998a8852999ef6850046b825a7d7eb7b	0	0	0	0	0	0	0	0	0	0	0	0	0	0	0	0	0	0	0	0	0	0	0	0	0	0	0	0	0	0	0	0	0	0	0	0	0	0	0	0	0	0	0	0	0	0	0	0	0
7a44ab3fc79827edb86894f587468717	0	0	0	0	0	0	0	0	0	0	0	0	0	0	0	0	0	0	0	0	0	0	0	0	0	0	0	0	0	0	0	0	0	0	0	0	0	0	0	0	0	0	0	0	0	0	0	0	0
aaa0ad0a6d0356e25da4fdcd80ae2e27	0	0	0	0	0	0	0	0	0	0	0	0	3	7	0	0	0	0	0	10	0	0	0	0	0	0	0	0	0	0	0	0	0	0	0	0	0	0	0	0	0	13	0	0	0	0	0	0	0
d1ff29d3049d1a875373dc6c45229337	4	0	0	0	0	0	0	0	0	4	0	0	0	0	0	0	0	0	0	0	0	0	0	0	0	0	0	0	0	0	0	0	0	0	0	0	0	0	0	0	0	0	0	0	13	0	0	0	0
f80c51b878ac1072a88ac1bd0e5dd2da	0	0	0	0	0	0	0	0	0	0	0	0	0	0	0	0	0	0	0	0	0	0	0	0	0	0	0	0	0	0	0	0	0	0	0	0	0	0	0	0	0	0	0	0	0	0	0	0	0
fff8a87ba4683598ebdb3476e572c3af	0	0	0	0	0	0	0	0	0	0	0	0	0	0	0	0	0	0	0	0	0	0	0	0	0	0	0	0	0	0	0	0	0	0	0	0	0	0	0	0	0	0	0	0	0	0	0	0	0
10b21dca7394bb2b5d23e827040cda15	0	0	0	0	0	0	0	0	0	0	0	0	0	0	0	0	0	0	0	0	0	0	0	0	0	0	0	0	0	0	0	0	0	0	0	0	0	0	0	0	0	0	0	0	0	0	0	0	0
b860505c8fad2abe6192f38b01126365	0	0	0	0	0	0	0	0	3	3	0	0	0	0	0	0	0	3	0	3	0	0	0	0	0	0	0	0	0	0	0	0	0	0	0	0	3	0	0	3	0	0	0	0	0	0	0	0	0
d74c002bae9335a6302461cf5cf305a6	0	0	0	0	0	0	0	0	0	0	0	0	0	0	9	0	0	0	0	9	0	0	0	0	0	0	0	0	0	0	0	0	0	0	0	0	0	0	0	0	0	0	0	0	0	0	0	0	0
14f42bc37692fa8fa562677e6c1b0cf6	0	0	0	0	0	0	0	0	0	0	0	0	0	0	0	0	33	0	0	33	0	0	0	0	0	0	0	0	0	0	0	0	0	0	0	0	0	0	0	0	0	0	0	0	0	0	0	0	0
ea1e23d9e7b196adee1954045e1d639d	0	0	0	0	0	0	0	0	0	0	0	0	0	0	0	0	0	0	0	0	0	0	0	0	0	0	0	0	0	0	17	0	0	0	0	0	0	0	0	17	0	0	0	0	0	0	0	0	0
24a76a7fe44866fc7e23a1096d3efdff	0	0	0	0	0	0	0	0	0	0	0	0	0	0	0	0	0	0	0	0	0	0	0	0	21	0	0	0	0	21	0	0	0	0	0	0	0	0	0	0	0	0	0	0	0	0	0	0	0
5b66b492b405966ea0a3e08bf11f7625	0	0	0	0	0	33	0	0	0	33	0	0	0	0	0	0	0	0	0	0	0	0	0	0	0	0	0	0	0	0	0	0	0	0	0	0	0	0	0	0	0	0	0	0	0	0	0	0	0
8d6ed920f0e58061959c64752c93ca77	0	0	0	0	0	0	0	0	0	0	0	0	0	0	0	0	0	0	0	0	0	0	0	0	0	0	0	0	0	0	0	0	0	0	0	0	0	0	0	0	0	0	0	0	0	0	0	0	0
5de156613500b4358145bc01a587da01	0	0	0	0	0	0	0	0	0	0	0	0	0	0	0	0	0	0	0	0	0	0	0	0	0	0	0	0	0	0	0	0	0	0	0	0	0	0	0	0	0	0	0	0	0	0	0	0	0
f91656aedb91d76d42de7bf2ef9875ef	0	0	0	0	0	0	0	0	0	0	0	0	0	0	0	0	0	0	0	0	0	0	0	0	0	0	0	0	0	0	0	0	0	0	0	0	0	0	0	0	0	0	0	0	0	0	0	0	0
f7934add957213217a83c273eba0f34b	0	0	0	0	0	0	0	0	0	0	0	0	0	0	0	0	0	0	0	0	0	0	0	0	0	0	0	0	0	0	0	0	0	0	0	0	0	0	0	0	0	0	0	0	0	0	0	0	0
2b6db98d30cda7534489b68aa66f13ae	0	0	0	0	0	0	0	0	0	0	0	0	0	0	0	0	0	0	0	0	0	0	0	0	0	0	0	0	0	0	0	0	0	0	0	0	0	0	0	0	0	0	0	0	0	0	0	0	0
a9f0c71d103bf89ebd94fc6c45ef4fec	0	0	0	0	0	0	0	0	0	0	0	0	0	0	0	0	0	0	0	0	0	0	0	0	0	0	0	0	0	0	0	0	0	0	0	0	0	0	0	0	0	0	0	0	0	0	0	0	0
26052217baf02119e0df863d7db1512d	0	0	0	0	0	0	0	0	0	0	0	0	0	0	0	0	0	0	0	0	0	0	0	0	0	0	0	0	0	0	0	0	0	0	0	0	0	0	0	0	0	0	0	0	0	0	0	0	0
e380977a46460b489f31b69c55d33e63	0	0	0	0	0	0	0	0	0	0	0	0	0	0	0	0	0	0	0	0	0	0	0	0	0	0	0	0	0	0	0	0	0	0	0	0	0	0	0	0	0	0	0	0	0	0	0	0	0
60ea3b568d52e6c0b8f5cf60e5b489f3	0	0	0	0	0	0	0	0	0	0	0	0	0	0	0	0	0	0	0	0	0	0	0	0	0	0	0	0	0	0	0	0	0	0	0	0	0	0	0	0	0	0	0	0	0	0	0	0	0
121d2e9369eeb8ce914b9173b1351ea3	0	0	0	0	0	0	0	0	0	0	0	0	0	0	0	0	0	0	0	0	0	0	0	0	0	0	0	0	0	0	0	0	0	0	0	0	0	0	0	0	0	0	0	0	0	0	0	0	0
e7bd2f2e1f6158db5f00b87f77509775	0	0	0	0	0	0	0	0	0	0	0	0	0	0	0	0	0	0	0	0	0	0	0	0	0	0	0	0	0	0	0	0	0	0	0	0	0	0	0	0	0	0	0	0	0	0	0	0	0
be0000caed676edd2c828a2d910bb865	0	0	0	0	0	0	0	0	0	0	0	0	0	0	0	0	0	0	0	0	0	0	0	0	0	0	0	0	0	0	0	0	0	0	0	0	0	0	0	0	0	0	0	0	0	0	0	0	0
854596d6c11070d47f74f0dfac24be0e	0	0	0	0	0	0	0	0	0	0	0	0	0	0	0	0	0	0	0	0	0	0	0	0	0	0	0	0	0	0	0	0	0	0	0	0	0	0	0	0	0	0	0	0	0	0	0	0	0
40b3748cf4b933cb6aa783fba69cad4e	0	0	0	0	0	0	0	0	0	0	0	0	0	0	0	0	0	0	0	0	0	0	0	0	0	0	0	0	0	0	0	0	0	0	0	0	0	0	0	0	0	0	0	0	32	0	0	0	0
e84bb095efe0b6a51609eb7d8678d29d	0	0	0	0	0	0	0	0	0	0	0	0	0	0	0	0	0	0	0	0	0	0	0	0	0	0	0	0	0	0	0	0	0	0	0	0	0	0	0	0	0	0	0	0	0	0	0	0	0
1ba56ac8a572f29c7b61cdf0195279fd	0	0	0	0	0	0	0	0	22	22	0	0	0	0	0	0	10	0	0	10	0	0	0	0	0	0	0	0	0	0	0	0	0	0	0	0	0	0	0	0	0	0	0	0	0	0	0	0	0
d92d35662b240ff8604566b362ede1c7	0	0	0	0	0	0	0	0	0	0	0	0	0	0	0	0	0	32	0	32	0	0	0	0	0	0	0	0	0	0	0	0	0	0	0	0	0	0	0	0	0	0	0	0	0	0	0	0	0
ead7877d2a85f886ffd4bc5c4dd50be8	32	0	0	0	0	0	0	0	0	32	0	0	0	0	0	0	0	0	0	0	0	0	0	0	0	0	0	0	0	0	0	0	0	0	0	0	0	0	0	0	0	0	0	0	0	0	0	0	0
e4ef45104283c44b98f419528f46b38e	20	0	12	0	0	0	0	0	0	32	0	0	0	0	0	0	0	0	0	0	0	0	0	0	0	0	0	0	0	0	0	0	0	0	0	0	0	0	0	0	0	0	0	0	0	0	0	0	0
a61cc5f25926186587acf8e0e668aa81	0	0	0	0	32	0	0	0	0	32	0	0	0	0	0	0	0	0	0	0	0	0	0	0	0	0	0	0	0	0	0	0	0	0	0	0	0	0	0	0	0	0	0	0	0	0	0	0	0
da2a305b9b63b91873d6440288610d3c	0	0	0	0	0	0	32	0	0	32	0	0	0	0	0	0	0	0	0	0	0	0	0	0	0	0	0	0	0	0	0	0	0	0	0	0	0	0	0	0	0	0	0	0	0	0	0	0	0
5abfba5cd1b5c06b27fbc675fb95bf08	0	0	0	0	0	0	0	32	0	32	0	0	0	0	0	0	0	0	0	0	0	0	0	0	0	0	0	0	0	0	0	0	0	0	0	0	0	0	0	0	0	0	0	0	0	0	0	0	0
3aeb911fcc399157f3dba19f8916b073	0	0	0	0	0	0	0	0	0	0	0	0	0	0	0	0	0	0	0	0	0	0	0	0	0	0	0	0	0	0	0	0	0	0	0	0	0	0	0	0	0	0	0	0	0	0	0	0	0
21b07d95d1af0ebdb47b847689663c30	0	0	0	0	0	0	0	0	0	0	0	0	0	0	0	0	0	0	0	0	0	0	0	0	0	0	0	0	0	0	0	0	0	0	0	0	0	0	0	0	0	0	0	0	0	0	0	0	0
de6c6a6ddfc8fde01449327f7b0d23d1	0	0	0	0	0	0	0	0	0	0	0	0	0	0	0	0	0	0	0	0	0	0	0	0	0	0	0	0	0	0	0	0	0	0	0	0	0	0	0	0	0	0	0	0	0	0	0	0	0
74bc7ab3fe18eb49668af5d13e933713	0	0	0	0	0	0	0	0	0	0	0	0	0	0	0	0	0	0	0	0	0	0	0	0	0	0	0	0	0	0	0	0	0	0	0	0	0	0	0	0	0	0	0	0	0	0	0	0	0
399d0898e83c166b5d1ee12853b5e10d	0	0	0	0	0	0	0	0	0	0	0	0	0	0	0	0	0	0	0	0	0	0	0	0	0	0	0	0	0	0	0	0	0	0	0	0	0	0	0	0	0	0	0	0	0	0	0	0	0
9595161bff5a35879b274372a31d37d0	0	0	0	0	0	0	0	0	0	0	0	0	0	0	0	0	0	0	0	0	0	0	0	0	0	0	0	0	0	0	0	0	0	0	0	0	0	0	0	0	0	0	0	0	0	0	0	0	0
25d499bd184d7ae783972ac6f9efcd3a	0	0	0	0	0	0	0	0	0	0	0	0	0	0	0	0	0	0	0	0	0	0	0	0	0	0	0	0	0	0	0	0	0	0	0	0	0	0	0	0	0	0	0	0	0	0	0	0	0
b349beafc2375770c3184254a92748d9	0	0	0	0	0	0	0	0	0	0	0	0	0	0	0	0	0	0	0	0	0	0	0	0	0	0	0	0	0	0	0	0	0	0	0	0	0	0	0	0	0	0	0	0	0	0	0	0	0
c2d4c44f0476f7b1c0796379f01629ba	0	0	0	0	0	0	0	0	0	0	0	0	0	0	0	0	0	0	0	0	0	0	0	0	0	0	0	0	0	0	0	0	0	0	0	0	0	0	0	0	0	0	0	0	0	0	0	0	0
08e0faa041d57213294d12717fbc1306	0	0	0	0	0	0	0	0	0	0	0	0	0	0	0	0	0	0	0	0	0	0	0	0	0	0	0	0	0	0	0	0	0	0	0	0	0	0	0	0	0	0	0	0	0	0	0	0	0
e216a8e4bffd184bc821af631bdec975	0	0	0	0	0	0	0	0	0	0	0	0	0	0	0	0	23	0	0	23	0	0	0	0	0	0	0	0	0	0	0	0	0	0	0	0	0	0	0	0	0	0	0	8	0	0	0	0	0
6c15a80aa87a24f63dd2b78e81555a8a	0	0	0	0	0	0	0	0	0	0	0	5	0	0	0	0	0	0	0	5	0	0	0	0	0	0	0	0	0	0	0	0	0	0	0	0	0	0	0	0	0	0	0	0	0	0	0	0	0
71ddd8f796a63622aff5aa9d6ccaf118	0	0	0	0	0	0	0	0	0	0	0	0	0	0	0	0	0	22	9	31	0	0	0	0	0	0	0	0	0	0	0	0	0	0	0	0	0	0	0	0	0	0	0	0	0	0	0	0	0
151c1e03e7a9c73233673abdd3dc0d7d	0	0	0	0	0	0	0	0	0	0	0	0	0	0	0	0	0	6	0	6	0	0	0	0	0	0	0	0	0	0	0	0	0	0	0	0	0	0	0	0	0	0	0	0	0	0	0	0	0
e7bb5b80d9e55e987c2064a84c5f4339	0	0	0	0	0	0	0	0	0	0	0	0	0	0	0	0	0	0	0	0	0	0	0	0	0	0	0	0	0	0	0	0	0	0	0	0	0	0	0	0	0	0	0	0	0	0	0	0	0
8d48458738b5a4c5464bbaf110bcd53a	0	0	0	0	0	0	0	0	0	0	0	0	0	0	0	0	0	0	0	0	0	0	0	0	0	0	0	0	0	0	0	19	0	0	0	0	0	0	0	19	0	0	0	0	0	0	0	0	0
42fe55a9c0a641a112732ddc1fec0504	0	0	0	0	0	0	0	0	0	0	0	0	0	0	0	0	0	0	0	0	0	0	0	0	0	0	0	0	0	0	0	0	0	0	0	0	0	0	31	31	0	0	0	0	0	0	0	0	0
3571824534e830bbe145feb32b0be626	0	0	0	0	0	0	0	0	0	0	0	0	0	0	0	0	0	0	0	0	0	0	0	0	31	0	0	0	0	31	0	0	0	0	0	0	0	0	0	0	0	0	0	0	0	0	0	0	0
3b8489f15d80d04b1591aea761ad58e3	0	0	0	0	0	0	0	0	0	0	0	0	0	0	0	0	0	0	0	0	0	0	0	0	0	0	0	0	0	0	0	0	0	0	0	0	0	0	0	0	0	0	0	0	0	0	0	0	0
771ef19241b37fc813ff8a492d92a2ab	0	0	0	0	0	0	0	0	0	0	0	0	0	0	0	0	0	0	0	0	0	0	0	0	0	0	0	0	0	0	0	0	0	0	0	0	0	0	0	0	0	0	0	0	0	0	0	0	0
86be1bbae758f6086b05d99a3cea76f3	0	0	0	0	0	0	0	0	0	0	0	0	0	0	0	0	0	0	0	0	0	0	0	0	0	0	0	0	0	0	0	0	0	0	0	0	0	0	0	0	0	0	0	0	0	0	0	0	0
7b0a9f82c10eccde6e76c8329bac9a5d	0	0	0	0	0	0	0	0	0	0	0	0	0	0	0	0	0	0	0	0	0	0	0	0	0	0	0	0	0	0	0	0	0	0	0	0	0	0	0	0	0	0	0	0	0	0	0	0	0
04c7002129f6b7dcdd201387874346da	0	0	0	0	0	0	0	0	0	0	0	0	0	0	0	0	0	0	0	0	0	0	0	0	0	0	0	0	0	0	0	0	0	0	0	0	0	0	0	0	0	0	0	0	0	0	0	0	0
ca374d08e78226f8841d0cfc2d47c47a	0	0	0	0	0	0	0	0	0	0	0	0	0	0	0	0	0	0	0	0	0	0	0	0	0	0	0	0	0	0	0	0	0	0	0	0	0	0	0	0	0	0	0	0	0	0	0	0	0
2235f0b2deed199d744cd44f08f2c7a2	0	0	0	0	0	0	0	0	0	0	0	0	0	0	0	0	0	0	0	0	0	0	0	0	0	0	0	0	0	0	0	0	0	0	0	0	0	0	0	0	0	0	0	0	0	0	0	0	0
6aa6ede7079c2d5f94f1d10b0b91409e	0	0	0	0	0	0	0	0	0	0	0	0	0	0	0	0	0	0	0	0	0	0	0	0	0	0	0	0	0	0	0	0	0	0	0	0	0	0	0	0	0	0	0	0	0	0	0	0	0
5521eeac3dd222a507af0c1cc275baec	0	0	0	0	0	0	0	0	0	0	0	0	0	0	0	0	0	0	0	0	0	0	0	0	0	0	0	0	0	0	0	0	0	0	0	0	0	0	0	0	0	0	0	0	0	0	0	0	0
d45e94af502004c0242d38175ff27b91	0	0	0	0	0	0	0	0	0	0	0	0	0	0	0	0	0	0	0	0	0	0	0	0	0	0	0	0	0	0	0	0	0	0	0	0	0	0	0	0	0	0	0	0	0	0	0	0	0
9b887d0e5fc738bd32de949e894d9231	0	0	0	0	0	0	0	0	0	0	0	0	0	0	0	0	0	0	0	0	0	0	0	0	0	0	0	0	0	0	0	0	0	0	0	0	0	0	0	0	0	0	0	0	0	0	0	0	0
0486f2bba056827ff5639ebc81bafc03	0	0	0	0	0	0	0	0	0	0	0	0	0	0	0	0	0	0	0	0	0	0	0	0	0	0	0	0	0	0	0	0	0	0	0	0	0	0	0	0	0	0	0	0	0	0	0	0	0
9211c857dfee5aed222fdc48e2986e11	0	0	0	0	0	0	0	0	0	0	0	0	0	0	0	0	0	0	0	0	0	0	0	0	0	0	0	0	0	0	0	0	0	0	0	0	0	0	0	0	0	0	0	0	0	0	0	0	0
ebf0bb9100bdad9acba0b49906776d11	0	0	0	0	0	0	0	0	0	0	0	0	0	0	0	0	0	0	0	0	0	0	0	0	0	0	0	0	0	0	0	0	0	0	0	0	0	0	0	0	0	0	0	0	0	0	0	0	0
04204e5a51a179c4befb8b4b8d2743ee	0	0	0	0	0	0	0	0	0	0	0	0	0	0	0	0	0	0	0	0	0	0	0	0	0	0	0	0	0	0	0	0	0	0	0	0	0	0	0	0	0	0	0	0	0	0	0	0	0
b09c286e1d8364ec3774922b31925aed	0	0	0	0	0	0	0	0	0	0	0	0	0	0	0	0	0	0	0	0	0	0	0	0	0	0	0	0	0	0	0	0	0	0	0	0	0	0	0	0	0	0	0	0	0	0	0	0	0
52365dcdc3c2f477d9ae82f4f9b328f6	0	0	0	0	0	0	0	0	0	0	0	0	0	0	0	0	0	0	0	0	0	0	0	0	0	0	0	0	0	0	0	0	0	0	0	0	0	0	0	0	0	0	0	0	0	0	0	0	0
e893878c0fcc9cc147be60842724c04d	0	0	0	0	0	0	0	0	0	0	0	0	0	0	0	0	0	0	0	0	0	0	0	0	0	0	0	0	0	0	0	0	0	0	0	0	0	0	0	0	0	0	0	0	0	0	0	0	0
ad1e9fdbfb8b2e6ea197d394c92003da	0	0	0	0	0	0	0	0	0	0	0	0	0	0	0	0	0	0	0	0	0	0	0	0	0	0	0	0	0	0	0	0	0	21	0	0	0	0	0	21	0	0	0	0	0	0	0	0	0
a48374f5bf1f0f4eb440fe9493b25c04	0	0	0	0	0	0	0	0	1	1	0	0	0	0	0	0	0	6	0	6	0	0	0	0	0	0	0	0	0	0	0	0	0	0	0	0	5	0	0	5	0	0	0	0	0	0	0	0	0
aeb04008550d13e9ddcbf04fa2dd03c0	0	0	0	0	0	0	0	0	0	0	0	0	0	0	0	0	0	0	0	0	0	0	0	0	0	0	0	0	0	0	0	0	0	0	0	0	0	0	0	0	0	0	0	0	0	0	0	0	0
292ff4c1b6f7b052016d8f2ca270b361	0	0	0	0	0	0	0	0	0	0	0	0	0	0	0	0	0	0	0	0	0	0	0	0	0	0	0	0	0	0	0	0	0	0	0	0	0	0	0	0	0	0	0	0	0	0	0	0	0
a8c21e56cdb35629b302a2a121fa1e5f	0	0	0	0	0	0	0	0	0	0	0	0	0	0	0	0	0	0	0	0	0	0	0	0	0	0	0	0	0	0	0	0	0	6	0	0	0	0	0	6	0	0	0	0	0	0	0	0	0
111343f5fd55f4511c631f597c1f5889	0	0	0	11	0	0	0	0	0	11	0	0	0	0	0	0	0	0	0	0	0	0	0	0	0	0	0	0	0	0	0	0	0	0	6	0	0	0	0	6	0	0	0	0	0	0	0	0	0
2732c6efab389ab6c43d2a3fe9dc5aab	0	0	0	0	0	0	0	0	0	0	0	0	0	0	0	0	0	0	0	0	0	0	0	0	30	0	0	0	0	30	0	0	0	0	0	0	0	0	0	0	0	0	0	0	0	0	0	0	0
82acc80e3a63cb6dc837b94d1f87f536	0	0	0	0	0	0	0	0	0	0	0	0	0	0	0	0	0	0	0	0	0	0	0	0	30	0	0	0	0	30	0	0	0	0	0	0	0	0	0	0	0	0	0	0	0	0	0	0	0
974f27f8df8ebdc4b67f95abf0539ee4	0	0	0	20	0	0	0	0	0	20	0	0	0	0	0	0	0	0	0	0	0	0	0	0	0	0	0	0	0	0	0	0	0	0	0	0	0	0	0	0	0	0	0	0	0	0	0	0	0
e61bb9d652466d02d2bfce68a0711945	0	0	0	0	0	30	0	0	0	30	0	0	0	0	0	0	0	0	0	0	0	0	0	0	0	0	0	0	0	0	0	0	0	0	0	0	0	0	0	0	0	0	0	0	0	0	0	0	0
da9cfc231f96015525cee7c782f37c62	0	0	0	0	0	0	0	0	0	0	0	0	0	0	0	0	0	0	0	0	0	0	0	0	0	0	0	0	0	0	0	0	0	0	0	0	0	0	0	0	0	0	0	0	0	0	0	0	0
f1f413e448d0df6d5a2b44ba51eba034	0	0	0	0	0	0	0	0	0	0	0	0	0	0	0	0	0	0	0	0	0	0	0	0	0	0	0	0	0	0	0	0	0	0	0	0	0	0	0	0	0	0	0	0	0	0	0	0	0
911a0e15548f4299c048064722dbcf02	0	0	0	0	0	0	0	0	0	0	0	0	0	0	0	0	0	0	0	0	0	0	0	0	0	0	0	0	0	0	0	0	0	0	0	0	0	0	0	0	0	0	0	0	0	0	0	0	0
71b81c3c1c95d21bcb129d0fc2a5b4c4	0	0	0	0	0	0	0	0	0	0	0	0	0	0	0	0	0	0	0	0	0	0	0	0	0	0	0	0	0	0	0	0	0	0	0	0	0	0	0	0	0	0	0	0	0	0	0	0	0
2eb4e41154355de61ffe325af67b0a3d	0	0	0	0	0	0	0	0	0	0	0	0	0	0	0	0	0	0	0	0	0	0	0	0	0	0	0	0	0	0	0	0	0	0	0	0	0	0	0	0	0	0	0	0	0	0	0	0	0
b18909a6d1d9b82486089837cfd7b5bf	0	0	0	0	0	0	0	0	0	0	0	0	0	0	0	0	0	0	0	0	0	0	0	0	0	0	0	0	0	0	0	0	0	0	0	0	0	0	0	0	0	0	0	0	0	0	0	0	0
ea61a3751ca0f8dd16ae6b09eefa5ffd	0	0	0	0	0	0	0	0	0	0	0	0	0	0	0	0	0	0	0	0	0	0	0	0	0	0	0	0	0	0	0	0	0	0	0	0	0	0	0	0	0	0	0	0	0	0	0	0	0
4645c173ae7bd3114ce5732a819a53f8	0	0	0	0	0	0	0	0	0	0	0	0	0	0	0	0	0	0	0	0	0	0	0	0	0	0	0	0	0	0	0	0	0	0	0	0	0	0	0	0	0	0	0	0	0	0	0	0	0
d7873c631cf73c564f8fe7cb19a93a0b	0	0	0	0	0	0	0	0	0	0	0	0	0	0	0	0	0	0	0	0	0	0	0	0	0	0	0	0	0	0	0	0	0	0	0	0	0	0	0	0	0	0	0	0	0	0	0	0	0
a7b7968c0af2dbeaa1d98032627716ce	0	0	0	0	0	0	0	0	0	0	0	0	0	0	0	0	0	0	0	0	0	0	0	0	0	0	0	0	0	0	0	0	0	0	0	0	0	0	0	0	0	0	0	0	0	0	0	0	0
3ed709bb4c55d760a4bc04125de740ec	0	0	0	0	8	0	0	0	0	8	0	0	0	0	0	0	0	0	0	0	0	0	0	0	0	0	0	0	0	0	0	0	0	0	0	0	0	0	0	0	0	0	0	0	0	0	0	0	0
1073ee9d0a1a7e1c9bb6a4fc06821e75	0	0	0	0	0	0	0	0	0	0	0	0	0	0	0	0	0	0	0	0	0	0	0	0	0	0	0	0	0	0	0	0	0	0	0	0	0	0	0	0	0	0	0	0	0	0	0	0	0
a02166fed68c875fba3e358cb61658d8	0	0	0	0	0	0	0	0	0	0	0	0	0	0	0	0	0	0	0	0	0	0	0	0	0	0	0	0	0	0	0	0	0	0	0	0	0	0	0	0	0	0	0	0	0	0	0	0	0
4adeade79f93661b55b72fc6409c65ca	0	0	0	0	0	0	0	0	0	0	18	0	0	11	0	0	0	0	0	29	0	0	0	0	0	0	0	0	0	0	0	0	0	0	0	0	0	0	0	0	0	0	0	0	0	0	0	0	0
981a9f949c65ed80e3154ddc27720f71	0	0	0	0	0	0	0	0	0	0	0	0	0	0	0	0	0	21	0	21	0	0	0	0	0	0	0	0	0	0	0	0	0	0	0	0	0	0	0	0	0	0	0	0	0	0	0	0	0
0f88d32925c9033d4afcbb37040f3134	0	0	0	0	0	0	0	0	0	0	0	0	0	0	0	0	0	0	0	0	0	0	0	0	0	0	0	0	0	0	20	0	0	0	0	0	0	0	0	20	0	0	0	0	0	0	0	0	0
a63d4616e129624e6c3f6e77661f372c	0	0	0	7	0	0	0	6	0	13	0	0	0	0	0	0	0	0	0	0	0	0	0	0	0	0	0	0	0	0	0	0	0	0	5	0	0	0	0	5	0	0	0	0	0	0	0	0	0
f2898d20976baa0c1bca20e2008c9b36	0	0	0	0	0	29	0	0	0	29	0	0	0	0	0	0	0	0	0	0	0	0	0	0	0	0	0	0	0	0	0	0	0	0	0	0	0	0	0	0	0	0	0	0	0	0	0	0	0
63776ae07aeb65cd44cc17c9c4e49715	0	0	0	0	0	29	0	0	0	29	0	0	0	0	0	0	0	0	0	0	0	0	0	0	0	0	0	0	0	0	0	0	0	0	0	0	0	0	0	0	0	0	0	0	0	0	0	0	0
b3d420802980bc7936e8a590d0178e44	0	0	0	0	0	0	0	0	0	0	0	0	0	0	0	0	0	0	0	0	0	0	0	0	0	0	0	0	0	0	0	0	0	0	0	0	0	0	0	0	0	0	0	0	0	0	0	0	0
a3a2f370c5859950c51a640d611822c5	0	0	0	0	0	0	0	0	0	0	0	0	0	0	0	0	0	0	0	0	0	0	0	0	0	0	0	0	0	0	0	0	0	0	0	0	0	0	0	0	0	0	0	0	0	0	0	0	0
80f9690112440564100c0d2211c9f7f2	0	0	0	0	0	0	0	0	0	0	0	0	0	0	0	0	0	0	0	0	0	0	0	0	0	0	0	0	0	0	0	0	0	0	0	0	0	0	0	0	0	0	0	0	0	0	0	0	0
3e4b662d248e2c21c7973f5015e7170c	0	0	0	0	0	0	0	0	0	0	0	0	0	0	0	0	0	0	0	0	0	0	0	0	0	0	0	0	0	0	0	0	0	0	0	0	0	0	0	0	0	0	0	0	0	0	0	0	0
0d311db2be42b8a8f5f05ece0ac699db	0	0	0	0	0	0	0	0	0	0	0	0	0	0	0	0	0	0	0	0	0	0	0	0	0	0	0	0	0	0	0	0	0	0	0	0	0	0	0	0	0	0	0	0	0	0	0	0	0
4cae97d8cbc33a86023feac0872978d4	0	0	0	0	0	0	0	0	0	0	0	0	0	0	0	0	0	0	0	0	0	0	0	0	0	0	0	0	0	0	0	0	0	0	0	0	0	0	0	0	0	0	0	0	0	0	0	0	0
d54c7d7bb32c487fa69d52e356de059f	0	0	0	0	0	0	0	0	0	0	0	0	0	0	0	0	0	0	0	0	0	0	0	0	0	0	0	0	0	0	0	0	0	0	0	0	0	0	0	0	0	0	0	0	0	0	0	0	0
b0fcc6188a9cb0626db0fff21612265a	0	0	0	0	0	0	0	0	0	0	0	0	0	0	0	0	0	0	0	0	0	0	0	0	0	0	0	0	0	0	0	0	0	0	0	0	0	0	0	0	0	0	0	0	0	0	0	0	0
6cb337c404f36a9cc5214665922fb6d3	0	0	0	0	0	0	0	0	0	0	0	0	0	0	0	0	0	0	0	0	0	0	0	0	0	0	0	0	0	0	0	0	0	0	0	0	0	0	0	0	0	0	0	0	0	0	0	0	0
863e8ccb35b76ca12c920a52311b2850	0	0	0	0	0	0	0	0	0	0	0	0	0	0	0	0	0	0	0	0	0	0	0	0	0	0	0	0	0	0	0	0	0	0	0	0	0	0	0	0	0	0	0	0	0	0	0	0	0
d4c7b61e3845cc5d5d490dd09e3ecbb1	0	0	0	0	0	0	0	0	0	0	0	0	0	0	0	0	0	0	0	0	0	0	0	0	0	0	0	0	0	0	0	0	0	0	0	0	0	0	0	0	0	0	0	0	0	0	0	0	0
e5274a1652e7ab2eb7a3f40a86eb7821	0	0	0	0	0	0	0	0	0	0	0	0	0	0	0	0	0	0	0	0	0	0	0	0	0	0	0	0	0	0	0	0	0	0	0	0	0	0	0	0	0	0	0	0	0	0	0	0	0
fd7f5a6434b22ba56e606f2053325d77	0	0	0	0	0	0	0	0	0	0	0	0	0	0	0	0	0	0	0	0	0	0	0	0	0	0	0	0	0	0	0	0	0	0	0	0	0	0	0	0	0	0	0	0	0	0	0	0	0
5e10e5946630aa8caad8ae942e6939dd	0	0	0	0	0	0	0	0	0	0	0	0	0	0	0	0	0	0	0	0	0	0	0	0	0	0	0	0	0	0	0	0	0	0	0	0	0	0	0	0	0	0	0	0	0	0	0	0	0
8fbde4e826175473e8b0d152902c3aa8	0	0	0	0	0	0	0	0	0	0	0	0	0	0	0	0	0	0	0	0	0	0	0	0	0	0	0	0	0	0	0	0	0	0	0	0	0	0	0	0	0	0	0	0	0	0	0	0	0
f588dd47896e1db039838940eff9a320	0	0	0	0	0	0	0	0	0	0	0	0	0	0	0	0	0	0	0	0	0	0	0	0	0	0	0	0	0	0	0	0	0	0	0	0	0	0	0	0	0	0	0	0	0	0	0	0	0
173082bba74cbf47437204594505a465	0	0	0	0	0	0	0	0	0	0	0	0	0	0	0	0	0	0	0	0	0	0	0	0	0	0	0	0	0	0	0	0	0	0	0	0	0	0	0	0	0	0	0	0	0	0	0	0	0
85dad9725db4ca9a5ed4ae6f23452d27	0	0	0	0	0	0	0	0	0	0	0	0	0	0	0	0	0	0	0	0	0	0	0	0	0	0	0	0	0	0	0	0	0	0	0	0	0	0	0	0	0	0	0	0	0	0	0	0	0
85beb08ccb6431cd88c64fc5034169b1	0	0	0	0	0	0	0	0	0	0	0	0	0	0	0	0	0	0	0	0	0	0	0	0	0	0	0	0	0	0	0	0	0	0	0	0	0	0	0	0	0	0	0	0	0	0	0	0	0
efc755f43a1a4c82c7bf69dfe3735fe4	0	0	0	0	0	0	0	0	0	0	0	0	0	0	0	0	0	0	0	0	0	0	0	0	0	0	0	0	0	0	0	0	0	0	0	0	0	0	0	0	0	0	0	0	0	0	0	0	0
922e6a1b8012529df9053b506b23aec5	0	0	0	0	0	0	0	0	0	0	0	0	0	0	0	0	0	0	0	0	0	0	0	0	0	0	0	0	0	0	0	0	0	0	0	0	0	0	0	0	0	0	0	0	0	0	0	0	0
53faab1a68488a5da1f6acb29bb0c67b	0	0	0	0	0	0	0	0	0	0	0	0	0	0	0	0	0	0	0	0	0	0	0	0	0	0	0	0	0	0	0	0	0	0	0	0	0	0	0	0	0	0	0	0	0	0	0	0	0
a4dd744800188a6778b0316bf93240be	0	0	0	0	0	0	0	0	0	0	0	0	0	0	0	0	0	0	0	0	0	0	0	0	0	0	0	0	0	0	0	0	0	0	0	0	0	0	0	0	0	0	0	0	0	0	0	0	0
cd20d0ee08e8b7f0ce90d5197bac56c9	0	0	0	0	0	0	0	0	0	0	0	0	0	0	0	0	0	0	0	0	0	0	0	0	0	0	0	0	0	0	0	0	0	0	0	0	0	0	0	0	0	0	0	0	0	0	0	0	0
c16a22c01d70d9d83db69add5a64285e	0	0	0	0	0	0	0	0	0	0	0	0	0	0	0	0	0	0	0	0	0	0	0	0	0	0	0	0	0	0	0	0	0	0	0	0	0	0	0	0	0	0	0	0	0	0	0	0	0
c23073bd51a0239545c535362de39ec5	0	0	0	0	0	0	0	0	0	0	0	0	0	0	0	0	0	0	0	0	0	0	0	0	0	0	0	0	0	0	0	0	0	0	0	0	0	0	0	0	0	0	0	0	0	0	0	0	0
109c988bc613ee46282fb47ff12a5f24	0	0	0	0	0	0	0	0	0	0	0	0	0	0	0	0	0	0	0	0	0	0	0	0	0	0	0	0	0	0	0	0	0	0	0	0	0	0	0	0	0	0	0	0	0	0	0	0	0
f7bbf55cff9b0935147433362d0f84e3	0	0	0	0	0	0	0	0	0	0	0	0	0	0	0	0	0	0	0	0	0	0	0	0	0	0	0	0	0	0	0	0	0	0	0	0	0	0	0	0	0	0	0	0	0	0	0	0	0
317da0d2cecebc97985abfb52d7b4bfe	0	11	0	0	0	0	0	0	0	11	0	0	0	0	0	0	0	0	0	0	0	0	0	0	0	0	0	0	0	0	0	0	0	0	0	0	0	0	0	0	0	0	0	0	0	0	0	0	0
fe7abf3cd6d809a0cad435ba4b6de2cc	0	0	0	0	0	0	0	0	0	0	0	0	0	0	0	0	0	0	0	0	0	0	0	0	0	0	0	0	0	0	0	0	0	0	0	0	0	0	0	0	0	0	0	0	0	0	0	0	0
5418d7ee58bd88a017343b391764237a	0	0	0	0	0	0	0	0	0	0	0	0	0	0	0	0	0	0	0	0	0	0	0	0	0	0	0	0	0	0	0	0	0	0	0	0	0	0	0	0	0	0	0	0	0	0	0	0	0
ca826013b77d79c157fa83603803fb69	0	0	0	0	0	0	0	0	0	0	9	0	0	0	7	0	0	0	0	16	0	0	0	0	0	0	0	0	0	0	0	0	0	0	0	0	0	0	0	0	0	0	0	7	0	0	0	0	0
3104f20c6e3f18739804951e33d09d72	0	0	0	0	0	0	0	0	0	0	0	28	0	0	0	0	0	0	0	28	0	0	0	0	0	0	0	0	0	0	0	0	0	0	0	0	0	0	0	0	0	0	0	0	0	0	0	0	0
99661ea25072c86eea822f9a0268ec19	0	0	0	0	0	0	0	0	0	0	0	28	0	0	0	0	0	0	0	28	0	0	0	0	0	0	0	0	0	0	0	0	0	0	0	0	0	0	0	0	0	0	0	0	0	0	0	0	0
b865bceb0b526421c5a3f40048145a0f	0	0	0	0	0	0	0	0	0	0	0	14	0	0	0	2	0	0	0	16	0	0	0	0	0	0	0	0	0	0	0	0	0	7	0	0	0	0	0	7	0	0	0	0	0	0	0	0	0
a396b1b8a35e5ee403885240131fb18f	0	0	0	0	0	0	0	0	0	0	0	0	0	0	0	0	0	0	28	28	0	0	0	0	0	0	0	0	0	0	0	0	0	0	0	0	0	0	0	0	0	0	0	0	0	0	0	0	0
9131c0bdf21653f5fb9c53eb6293f535	0	0	0	0	0	10	0	0	0	10	0	0	0	0	0	0	0	0	0	0	0	0	0	0	0	0	0	0	0	0	5	0	0	0	0	0	0	0	0	5	0	0	0	0	0	0	0	0	0
091805fe8c5a9e59294002d61ba2b9db	0	0	0	0	0	0	0	0	0	0	0	0	0	0	0	0	0	0	0	0	0	0	0	0	0	0	0	0	0	0	0	0	0	28	0	0	0	0	0	28	0	0	0	0	0	0	0	0	0
d0c5044d4cd813eb7ce383f961250cf5	28	0	0	0	0	0	0	0	0	28	0	0	0	0	0	0	0	0	0	0	0	0	0	0	0	0	0	0	0	0	0	0	0	0	0	0	0	0	0	0	0	0	0	0	0	0	0	0	0
841c6adadf63d72adbf843bbb70ae17d	0	0	0	0	0	0	0	0	28	28	0	0	0	0	0	0	0	0	0	0	0	0	0	0	0	0	0	0	0	0	0	0	0	0	0	0	0	0	0	0	0	0	0	0	0	0	0	0	0
7baeaacd818f7e765d538847a2b79c61	0	0	0	0	0	0	0	0	0	0	0	0	0	0	0	0	0	0	0	0	0	0	0	0	0	0	0	0	0	0	0	0	0	0	0	0	0	0	0	0	0	0	0	0	0	0	0	0	0
777a6b5c9de0454c58ae79050f030c3a	0	0	0	0	0	0	0	0	0	0	0	0	0	0	0	0	0	0	0	0	0	0	0	0	0	0	0	0	0	0	0	0	0	0	0	0	0	0	0	0	0	0	0	0	0	0	0	0	0
cfe3e55cd0de4389a1f91ee3feaea409	0	0	0	0	0	0	0	0	0	0	0	0	0	0	0	0	0	0	0	0	0	0	0	0	0	0	0	0	0	0	0	0	0	0	0	0	0	0	0	0	0	0	0	0	0	0	0	0	0
b7b01aec2cf7a0225eb19527ef321354	0	0	0	0	0	0	0	0	0	0	0	0	0	0	0	0	0	0	0	0	0	0	0	0	0	0	0	0	0	0	0	0	0	0	0	0	0	0	0	0	0	0	0	0	0	0	0	0	0
ea7b1dd35a4f5e9fb42aefc022ac414b	0	0	0	0	0	0	0	0	0	0	0	0	0	0	0	0	0	0	0	0	0	0	0	0	0	0	0	0	0	0	0	0	0	0	0	0	0	0	0	0	0	0	0	0	0	0	0	0	0
3cecfefe701fd16e6713ab4af3fe2b69	0	0	0	0	0	0	0	0	0	0	0	0	0	0	0	0	0	0	0	0	0	0	0	0	0	0	0	0	0	0	0	0	0	0	0	0	0	0	0	0	0	0	0	0	0	0	0	0	0
5b3a3945831758c3b8f98279090a1ea0	0	0	0	0	0	0	0	0	0	0	0	0	0	0	0	0	0	0	0	0	0	0	0	0	0	0	0	0	0	0	0	0	0	0	0	0	0	0	0	0	0	0	0	0	0	0	0	0	0
0829a7d48f308812de6b46c217e283e1	0	0	0	0	0	0	0	0	0	0	0	0	0	0	0	0	0	0	0	0	0	0	0	0	0	0	0	0	0	0	0	0	0	0	0	0	0	0	0	0	0	0	0	0	0	0	0	0	0
7416a10615608cce5b4d762e0d469205	0	0	0	0	0	0	0	0	0	0	0	0	0	0	0	0	0	0	0	0	0	0	0	0	0	0	0	0	0	0	0	0	0	0	0	0	0	0	0	0	0	0	0	0	0	0	0	0	0
a3e521d041a9dc3c0256fc2048e7dd5b	0	0	0	0	0	0	0	0	0	0	0	0	0	0	0	0	0	0	0	0	0	0	0	0	0	0	0	0	0	0	0	0	0	0	0	0	0	0	0	0	0	0	0	0	0	0	0	0	0
6b27a5d0b822ba02214e1010f73f9bbf	0	0	0	0	0	0	0	0	0	0	0	0	0	0	0	0	0	0	0	0	0	0	0	0	0	0	0	0	0	0	0	0	0	0	0	0	0	0	0	0	0	0	0	0	0	0	0	0	0
cb685ff072096264146818e1491289ef	0	0	0	0	0	0	0	0	0	0	0	0	0	0	0	0	0	0	0	0	0	0	0	0	0	0	0	0	0	0	0	0	0	0	0	0	0	0	0	0	0	0	0	0	0	0	0	0	0
2038082d978a6e25e93e0c73930f8f62	0	0	0	0	0	0	0	0	0	0	0	0	0	0	0	0	0	0	0	0	0	0	0	0	0	0	0	0	0	0	0	0	0	0	0	0	0	0	0	0	0	0	0	0	0	0	0	0	0
8c39e625b7923b05dbebcaef9ff717a1	0	0	0	0	0	0	0	0	0	0	0	0	0	0	0	0	0	0	0	0	0	0	0	0	0	0	0	0	0	0	0	0	0	0	0	0	0	0	0	0	0	0	0	0	0	0	0	0	0
0da8a5bc9c4ba5b1c52b0f96b2402969	0	0	0	0	0	0	0	0	0	0	0	0	0	0	0	0	0	0	0	0	0	0	0	0	0	0	0	0	0	0	0	0	0	0	0	0	0	0	0	0	0	0	0	0	0	0	0	0	0
0b31bdbb6c42eef4095e2dfff3197117	0	0	0	0	0	0	0	0	0	0	0	0	0	0	0	0	0	0	0	0	0	0	0	0	0	0	0	0	0	0	0	0	0	0	0	0	0	0	0	0	0	0	0	0	0	0	0	0	0
e361caeb0a71e26dc03632a14f158d15	0	0	0	0	0	0	0	0	0	0	0	0	0	0	0	0	0	0	0	0	0	0	0	0	0	0	0	0	0	0	0	0	0	0	0	0	0	0	0	0	0	0	0	0	0	0	0	0	0
aa80065dde12e6ad16ed0618c586e8bc	0	0	0	0	0	0	0	0	0	0	0	0	0	0	0	0	0	0	0	0	0	0	0	0	0	0	0	0	0	0	0	0	0	0	0	0	0	0	0	0	0	0	0	0	0	0	0	0	0
891d29fb93216d32ad0e06c6ada51f5d	0	0	0	0	0	0	0	0	0	0	0	0	0	0	0	0	0	0	0	0	0	0	0	0	0	0	0	0	0	0	0	0	0	0	0	0	0	0	0	0	0	0	0	0	0	0	0	0	0
c092b4b4057def0045444f3404cd8377	0	0	0	0	0	0	0	0	0	0	0	0	0	0	0	0	0	0	0	0	0	0	0	0	0	0	0	0	0	0	0	0	0	0	0	0	0	0	0	0	0	0	0	0	0	0	0	0	0
8cf7488c58e08acd4d9d85653107f985	0	0	0	0	0	0	0	0	0	0	0	0	0	0	0	0	0	0	0	0	0	0	0	0	0	0	0	0	0	0	0	0	0	0	0	0	0	0	0	0	0	0	0	0	0	0	0	0	0
1d60f5b239e5034281d329400d7dfb70	0	0	0	0	0	0	0	0	0	0	0	0	0	0	0	0	0	0	0	0	0	0	0	0	0	0	0	0	0	0	0	0	0	0	0	0	0	0	0	0	0	0	0	0	0	0	0	0	0
948f4e064820aeaeeb8b3984b94c898e	0	0	0	0	15	0	0	0	0	15	0	0	0	0	0	0	0	0	0	0	0	0	0	0	0	0	0	0	0	0	0	0	4	0	0	0	0	0	0	4	0	0	0	0	0	0	0	0	0
96e5bdcc9dfe15a8335724354e9801cc	0	0	0	0	0	9	0	0	7	16	0	0	0	0	0	0	0	0	0	0	0	0	0	0	0	0	0	0	0	0	0	0	0	0	0	0	0	0	0	0	0	0	0	0	0	0	0	0	0
4a683df38a9c765ada7f29f731abb648	0	0	0	0	0	0	0	0	0	0	0	0	0	0	0	0	0	0	0	0	0	0	0	0	0	0	0	0	0	0	5	0	0	0	0	0	0	0	0	5	0	0	0	0	0	0	0	0	0
c85057ccb5796849d20961013bd5f3bb	0	0	0	0	0	0	0	0	0	0	0	0	0	0	0	0	0	0	0	0	0	0	0	0	0	0	0	0	0	0	0	0	0	27	0	0	0	0	0	27	0	0	0	0	0	0	0	0	0
aae6dbe586de5e4ac16d980b1724a9b5	0	0	0	0	0	0	0	0	0	0	0	0	0	0	0	0	0	0	0	0	0	0	10	0	0	0	0	0	0	10	0	0	0	0	0	0	0	0	0	0	0	0	0	0	0	0	0	0	0
5ed5799caf608d008d58417fe0935a02	0	0	0	0	27	0	0	0	0	27	0	0	0	0	0	0	0	0	0	0	0	0	0	0	0	0	0	0	0	0	0	0	0	0	0	0	0	0	0	0	0	0	0	0	0	0	0	0	0
cebb5dfdaf4ae87264f150f472e9edf7	0	0	0	0	0	0	27	0	0	27	0	0	0	0	0	0	0	0	0	0	0	0	0	0	0	0	0	0	0	0	0	0	0	0	0	0	0	0	0	0	0	0	0	0	0	0	0	0	0
ddd844a2fb66054f2987b4f61e5418f3	0	0	0	0	0	0	0	0	27	27	0	0	0	0	0	0	0	0	0	0	0	0	0	0	0	0	0	0	0	0	0	0	0	0	0	0	0	0	0	0	0	0	0	0	0	0	0	0	0
89ce9d513de7313a08b107ec39e1f740	0	0	0	0	0	0	0	0	0	0	0	0	0	0	0	0	0	0	0	0	0	0	0	0	0	0	0	0	0	0	0	0	0	0	0	0	0	0	0	0	0	0	0	0	0	0	0	0	0
e97a1508b24ece0e45e6643c1ad95435	0	0	0	0	0	0	0	0	0	0	0	0	0	0	0	0	0	0	0	0	0	0	0	0	0	0	0	0	0	0	0	0	0	0	0	0	0	0	0	0	0	0	0	0	0	0	0	0	0
019ce10845b4546eb7e2a63f73141166	0	0	0	0	0	0	0	0	0	0	0	0	0	0	0	0	0	0	0	0	0	0	0	0	0	0	0	0	0	0	0	0	0	0	0	0	0	0	0	0	0	0	0	0	0	0	0	0	0
514233f2d750387ded2dfa53ee42695e	0	0	0	0	0	0	0	0	0	0	0	0	0	0	0	0	0	0	0	0	0	0	0	0	0	0	0	0	0	0	0	0	0	0	0	0	0	0	0	0	0	0	0	0	0	0	0	0	0
c1cccf4c99b7712f68aedfeb07a349a0	0	0	0	0	0	0	0	0	0	0	0	0	0	0	0	0	0	0	0	0	0	0	0	0	0	0	0	0	0	0	0	0	0	0	0	0	0	0	0	0	0	0	0	0	0	0	0	0	0
04639c55000cc2ccd14d8c524109749f	0	0	0	0	0	0	0	0	0	0	0	0	0	0	0	0	0	0	0	0	0	0	0	0	0	0	0	0	0	0	0	0	0	0	0	0	0	0	0	0	0	0	0	0	0	0	0	0	0
f5016e96577a3277088797d04139e7d7	0	0	0	0	0	0	0	0	0	0	0	0	0	0	0	0	0	0	0	0	0	0	0	0	0	0	0	0	0	0	0	0	0	0	0	0	0	0	0	0	0	0	0	0	0	0	0	0	0
c916277e03993976e4b877c684d11496	0	0	0	0	0	0	0	0	0	0	0	0	0	0	0	0	0	0	0	0	0	0	0	0	0	0	0	0	0	0	0	0	0	0	0	0	0	0	0	0	0	0	0	0	0	0	0	0	0
8f2aef6870a837b174aa43ff0c4b63ef	0	0	0	0	0	0	0	0	0	0	0	0	0	0	0	0	0	0	0	0	0	0	0	0	0	0	0	0	0	0	0	0	0	0	0	0	0	0	0	0	0	0	0	0	0	0	0	0	0
ca2309dedb44a644b6580199803ec8a2	0	0	0	0	0	0	0	0	0	0	0	0	0	0	0	0	0	0	0	0	0	0	0	0	0	0	0	0	0	0	0	0	0	0	0	0	0	0	0	0	0	0	0	0	0	0	0	0	0
8a6cec44f5ed95c03294f3984dda34ad	0	0	0	0	0	0	0	0	0	0	0	0	0	0	0	0	0	0	0	0	0	0	0	0	0	0	0	0	0	0	0	0	0	0	0	0	0	0	0	0	0	0	0	0	0	0	0	0	0
79c0d22b62c20134f43d1bcd5bfc7324	0	0	0	0	0	0	0	0	0	0	0	0	0	0	0	0	0	0	0	0	0	0	0	0	0	0	0	0	0	0	0	0	0	0	0	0	0	0	0	0	0	0	0	0	0	0	0	0	0
4ce5ceb90dc9ea0c5d90863844dc4e93	0	0	0	0	0	0	0	0	0	0	0	0	0	0	0	0	0	0	0	0	0	0	0	0	0	0	0	0	0	0	0	0	0	0	0	0	0	0	0	0	0	0	0	0	0	0	0	0	0
0ac35eef8c041d80c1a5b1851a480f86	0	0	0	0	0	0	0	0	0	0	0	0	0	0	0	0	0	0	0	0	0	0	0	0	0	0	0	0	0	0	0	0	0	0	0	0	0	0	0	0	0	0	0	0	0	0	0	0	0
d93c1bcd767412cdc3532c4c68d7c65b	0	0	0	0	0	0	0	0	0	0	0	0	0	0	0	0	0	0	0	0	0	0	0	0	0	0	0	0	0	0	0	0	0	0	0	0	0	0	0	0	0	0	0	0	0	0	0	0	0
1af573b9829a6ea13701a12817875a5d	0	0	0	0	0	0	0	0	0	0	0	0	0	0	0	0	0	0	0	0	0	0	0	0	0	0	0	0	0	0	0	0	0	0	0	0	0	0	0	0	0	0	0	0	0	0	0	0	0
4fa3f6584a36bf042a74f2d30d68fb53	0	0	0	0	0	0	0	0	0	0	0	0	0	0	0	0	0	0	0	0	0	0	0	0	0	0	0	0	0	0	0	0	0	0	0	0	0	0	0	0	0	0	0	0	0	0	0	0	0
efefa39a1358ac19d3b04a73af8c53f0	0	0	0	0	0	0	0	0	0	0	0	0	0	0	0	0	0	0	0	0	0	0	0	0	0	0	0	0	0	0	0	0	0	0	0	0	0	0	0	0	0	0	0	0	0	0	0	0	0
76471a7a069a71ed3bab7a389acb5566	0	0	0	0	0	0	0	0	0	0	0	0	0	0	0	0	0	0	0	0	0	0	0	0	0	7	0	0	0	7	0	0	0	0	0	0	0	0	0	0	0	0	0	0	0	0	0	0	0
1ddc34b23a993468ac3b9de76004f253	0	0	0	0	0	0	0	0	0	0	0	0	0	0	0	0	0	0	0	0	0	0	0	0	0	0	0	0	0	0	0	0	0	0	0	0	0	0	0	0	0	0	0	0	26	0	0	0	0
486addb8e3b77b808597c849a34a95dc	0	0	0	0	0	0	0	0	0	0	0	0	0	0	0	0	0	0	0	0	0	0	0	0	0	0	0	0	0	0	0	0	0	0	0	0	0	0	0	0	0	0	0	0	0	0	0	0	0
07a5b82179c17b28ce51e1757357688f	0	0	0	0	0	0	0	0	0	0	0	9	0	0	0	5	0	8	0	22	0	0	0	0	0	0	0	0	0	0	0	0	0	0	0	0	0	0	0	0	0	0	0	0	0	0	0	0	0
feb21d774c9495ab62dff7aed4cccfa3	0	0	0	0	0	0	0	0	0	0	0	0	26	0	0	0	0	0	0	26	0	0	0	0	0	0	0	0	0	0	0	0	0	0	0	0	0	0	0	0	0	0	0	0	0	0	0	0	0
a5769f93464b20df1138a678922367f9	0	0	0	0	0	0	0	0	0	0	0	0	0	0	0	0	0	0	0	0	0	0	0	0	0	0	0	0	0	0	0	0	0	0	0	0	0	0	0	0	0	0	0	0	0	0	0	0	0
d18bbca30985bd93d533756ff068c1a1	0	0	0	0	0	0	0	0	0	0	0	0	0	0	0	0	0	0	0	0	0	0	0	0	0	0	0	0	0	0	0	0	0	0	0	0	0	0	0	0	0	0	0	0	0	0	0	0	0
d67327e3d4e1a5c938a035595483ac05	0	0	0	0	0	0	0	0	0	0	0	0	0	0	0	0	0	0	0	0	0	0	0	0	26	0	0	0	0	26	0	0	0	0	0	0	0	0	0	0	0	0	0	0	0	0	0	0	0
ef5d0ae4ea88b68528b0129bf3d97440	26	0	0	0	0	0	0	0	0	26	0	0	0	0	0	0	0	0	0	0	0	0	0	0	0	0	0	0	0	0	0	0	0	0	0	0	0	0	0	0	0	0	0	0	0	0	0	0	0
a134e8e0cd83928d72e615f481698dfb	0	0	0	0	0	0	0	0	0	0	0	0	0	0	0	0	0	0	0	0	0	0	0	0	0	0	0	0	0	0	0	0	0	0	0	0	0	0	0	0	0	0	0	0	0	0	0	0	0
6f981dfa44dd9010d7c3208404c31c4d	0	0	0	0	0	0	0	0	0	0	0	0	0	0	0	0	0	0	0	0	0	0	0	0	0	0	0	0	0	0	0	0	0	0	0	0	0	0	0	0	0	0	0	0	0	0	0	0	0
9b668a78dea1121ceba4e8ba92dcde3d	0	0	0	0	0	0	0	0	0	0	0	0	0	0	0	0	0	0	0	0	0	0	0	0	0	0	0	0	0	0	0	0	0	0	0	0	0	0	0	0	0	0	0	0	0	0	0	0	0
55995eb0c8480471805524428dc387a6	0	0	0	0	0	0	0	0	0	0	0	0	0	0	0	0	0	0	0	0	0	0	0	0	0	0	0	0	0	0	0	0	0	0	0	0	0	0	0	0	0	0	0	0	0	0	0	0	0
fd19a8f453d201ed7fcf81a50759392b	0	0	0	0	0	0	0	0	0	0	0	0	0	0	0	0	0	0	0	0	0	0	0	0	0	0	0	0	0	0	0	0	0	0	0	0	0	0	0	0	0	0	0	0	0	0	0	0	0
688ee8228124cbfec4419fdb6016a4dd	0	0	0	0	0	0	0	0	0	0	0	0	0	0	0	0	0	0	0	0	0	0	0	0	0	0	0	0	0	0	0	0	0	0	0	0	0	0	0	0	0	0	0	0	0	0	0	0	0
8cffed91537c0ec79aff2975bce4ec80	0	0	0	0	0	0	0	0	0	0	0	0	0	0	0	0	0	0	0	0	0	0	0	0	0	0	0	0	0	0	0	0	0	0	0	0	0	0	0	0	0	0	0	0	0	0	0	0	0
fb59144ed8290a99717067a92a86d604	0	0	0	0	0	0	0	0	0	0	0	0	0	0	0	0	0	0	0	0	0	0	0	0	0	0	0	0	0	0	0	0	0	0	0	0	0	0	0	0	0	0	0	0	0	0	0	0	0
cc2c595b9ee7c8774d76c2c7ed6e7ba4	0	0	0	0	0	0	0	0	0	0	0	0	0	0	0	0	0	0	0	0	0	0	0	0	0	0	0	0	0	0	0	0	0	0	0	0	0	0	0	0	0	0	0	0	0	0	0	0	0
e8231f6178e4037f77f3033e3410c8f5	0	0	0	0	0	0	0	0	0	0	0	0	0	0	0	0	0	0	0	0	0	0	0	0	0	0	0	0	0	0	0	0	0	0	0	0	0	0	0	0	0	0	0	0	0	0	0	0	0
d021664e8c2ac439f03810d0161ccfae	0	0	0	0	0	0	0	0	0	0	0	0	0	0	0	0	0	0	0	0	0	0	0	0	0	0	0	0	0	0	0	0	0	0	0	0	0	0	0	0	0	0	0	0	0	0	0	0	0
7092b76ae958c6d409fa1337935263cf	0	0	0	0	0	0	0	0	0	0	0	0	0	0	0	0	0	0	0	0	0	0	0	0	0	0	0	0	0	0	0	0	0	0	0	0	0	0	0	0	0	0	0	0	0	0	0	0	0
8cb1ae00ed566b451877668a7d7b228f	0	0	0	0	0	0	0	0	0	0	0	0	0	0	0	0	0	0	0	0	0	0	0	0	0	0	0	0	0	0	0	0	0	0	0	0	0	0	0	0	0	0	0	0	0	0	0	0	0
02b445d9af82cf502ef0bb2d3a7030fb	0	0	0	0	0	0	0	0	0	0	0	0	0	0	0	0	0	0	0	0	0	0	0	0	0	0	0	0	0	0	0	0	0	0	0	0	0	0	0	0	0	0	0	0	0	0	0	0	0
a9440334596a5ead5d7c04a58797f31f	0	0	0	0	0	0	0	0	0	0	0	0	0	0	0	0	0	0	0	0	0	0	0	0	0	0	0	0	0	0	0	0	0	0	0	0	0	0	0	0	0	0	0	0	0	0	0	0	0
14bded82f44500c3e60852fa7c918525	0	0	0	0	0	0	0	0	0	0	0	0	0	0	0	0	0	0	0	0	0	0	0	0	0	0	0	0	0	0	0	0	0	0	0	0	0	0	0	0	0	0	0	0	0	0	0	0	0
a105cb61edf17f821a714e16003b6e16	0	0	0	0	0	0	0	0	0	0	0	0	0	0	0	0	0	0	0	0	0	0	0	0	0	0	0	0	0	0	0	0	0	0	0	0	0	0	0	0	0	0	0	0	0	0	0	0	0
b4ddf1bb0066ad5580f3d583ce2caad5	0	0	0	0	0	0	0	0	0	0	0	0	0	0	0	0	0	0	0	0	0	0	0	0	0	0	0	0	0	0	0	0	0	0	0	0	0	0	0	0	0	0	0	0	0	0	0	0	0
cc698589ba8c842e5c38b4efc4bf048b	0	0	0	0	0	0	0	0	0	0	0	0	0	0	0	0	0	0	0	0	0	0	0	0	0	0	0	0	0	0	0	0	0	0	0	0	0	0	0	0	0	0	0	0	0	0	0	0	0
6ed0b62ff91af6c6ecfc0ef34e59a4c0	0	0	0	0	0	0	0	0	0	0	0	0	0	0	0	0	0	0	0	0	0	0	0	0	0	0	0	0	0	0	0	0	0	0	0	0	0	0	0	0	0	0	0	0	0	0	0	0	0
881f6742196fb4cfdb75fdf49833d6b1	0	0	0	0	0	0	0	0	0	0	0	0	0	0	0	0	0	0	0	0	0	0	0	0	0	0	0	0	0	0	0	0	0	0	0	0	0	0	0	0	0	0	0	0	0	0	0	0	0
637d726cbb77f5fcbb88572d135aab35	0	0	0	0	0	0	0	0	0	0	0	0	0	0	0	0	0	0	0	0	0	0	0	0	0	0	0	0	0	0	0	0	0	0	0	0	0	0	0	0	0	0	0	0	0	0	0	0	0
2541aa0175baed4d8037dd9add458550	0	0	0	0	0	0	0	0	0	0	0	0	0	0	0	0	0	0	0	0	0	0	0	0	0	0	0	0	0	0	0	0	0	0	0	0	0	0	0	0	0	0	0	0	0	0	0	0	0
70e14e31dd3f3bd1f23b03a70fc04f39	0	0	0	0	0	0	0	0	0	0	0	0	0	0	0	0	0	0	0	0	0	0	0	0	0	0	0	0	0	0	0	0	0	0	0	0	0	0	0	0	25	0	0	0	0	0	0	0	0
1a36fdb034867e30b6b65d513925c79d	0	0	0	0	0	0	0	0	0	0	0	0	0	0	0	0	0	0	0	0	0	0	0	0	0	0	0	0	0	0	0	0	0	0	0	0	0	0	0	0	0	0	0	0	25	0	0	0	0
615ea5c74d2de4aa1e856a40f3c0fcce	0	0	0	0	0	0	0	0	0	0	0	0	0	0	0	0	0	0	0	0	0	0	0	0	0	0	0	0	0	0	0	0	0	0	0	0	0	0	0	0	0	0	0	0	0	0	0	0	0
edf372134aafc0697dbd36db4b66d8de	0	0	0	0	0	0	0	0	0	0	0	0	0	0	0	0	0	0	0	0	0	0	0	0	0	0	0	0	0	0	0	0	0	0	0	0	0	0	0	0	0	0	0	0	0	0	0	0	0
299fc37ff9b2cf71102fdcd27c03986e	0	0	0	0	0	0	0	0	0	0	0	0	0	0	0	0	0	0	0	0	0	0	0	0	0	0	0	0	0	0	0	0	0	0	0	0	0	0	0	0	0	0	0	0	0	0	0	0	0
1a21f035a5ffd9c1afd88390598d0771	0	0	0	0	0	0	0	0	0	0	0	25	0	0	0	0	0	0	0	25	0	0	0	0	0	0	0	0	0	0	0	0	0	0	0	0	0	0	0	0	0	0	0	0	0	0	0	0	0
67cef763b5fe08c6728629977702eb6a	0	0	0	18	0	0	0	0	0	18	0	0	0	0	0	0	0	0	0	0	0	0	0	0	0	0	0	0	0	0	0	0	0	0	0	0	0	0	0	0	0	0	0	0	0	0	0	0	0
b45f3d85aef184f5f428f772365ccc55	0	0	0	0	0	0	0	0	0	0	0	0	0	0	0	0	0	0	0	0	0	0	0	0	0	0	0	0	0	0	0	0	0	14	0	0	0	0	0	14	0	0	0	0	0	0	0	0	0
14a02f896bbea31c0282462d2c5f6bac	0	0	0	0	0	0	0	0	0	0	0	0	0	0	0	0	0	0	0	0	0	0	0	0	0	0	0	0	0	0	0	0	0	15	0	0	0	0	0	15	0	0	0	0	0	0	0	0	0
bb0829d68dc0a9d47cf970fe2492baa5	0	0	0	0	0	0	0	0	0	0	0	0	0	0	0	0	0	0	0	0	0	0	0	0	25	0	0	0	0	25	0	0	0	0	0	0	0	0	0	0	0	0	0	0	0	0	0	0	0
ca82d9555342058200645967730eb317	0	0	0	0	25	0	0	0	0	25	0	0	0	0	0	0	0	0	0	0	0	0	0	0	0	0	0	0	0	0	0	0	0	0	0	0	0	0	0	0	0	0	0	0	0	0	0	0	0
a42f02d5f7dcdd878dc1c8c0268fce16	0	0	0	0	0	0	0	0	0	0	0	0	0	0	0	0	0	0	0	0	0	0	0	0	0	0	0	0	0	0	0	0	0	0	0	0	0	0	0	0	0	0	0	0	0	0	0	0	0
75e831cdce5b4fe9b17b063127557e1e	0	0	0	0	0	0	0	0	0	0	0	0	0	0	0	0	0	0	0	0	0	0	0	0	0	0	0	0	0	0	0	0	0	0	0	0	0	0	0	0	0	0	0	0	0	0	0	0	0
88fe5cc3d56a3de4fdb144638f40d4b2	0	0	0	0	0	0	0	0	0	0	0	0	0	0	0	0	0	0	0	0	0	0	0	0	0	0	0	0	0	0	0	0	0	0	0	0	0	0	0	0	0	0	0	0	0	0	0	0	0
ae8aec5627f07696624b41bf6b24a698	0	0	0	0	0	0	0	0	0	0	0	0	0	0	0	0	0	0	0	0	0	0	0	0	0	0	0	0	0	0	0	0	0	0	0	0	0	0	0	0	0	0	0	0	0	0	0	0	0
2bf853225c40b586b5a38ffa3cca15c0	0	0	0	0	0	0	0	0	0	0	0	0	0	0	0	0	0	0	0	0	0	0	0	0	0	0	0	0	0	0	0	0	0	0	0	0	0	0	0	0	0	0	0	0	0	0	0	0	0
07297bae6d5496fcd64a1251f4e7ae5f	0	0	0	0	0	0	0	0	0	0	0	0	0	0	0	0	0	0	0	0	0	0	0	0	0	0	0	0	0	0	0	0	0	0	0	0	0	0	0	0	0	0	0	0	0	0	0	0	0
2f63c5fc6ff07353925ab488816735d5	0	0	0	0	0	0	0	0	0	0	0	0	0	0	0	0	0	0	0	0	0	0	0	0	0	0	0	0	0	0	0	0	0	0	0	0	0	0	0	0	0	0	0	0	0	0	0	0	0
8b709ce7f1339c88ebc29d7f3ba9b091	0	0	0	0	0	0	0	0	0	0	0	0	0	0	0	0	0	0	0	0	0	0	0	0	0	0	0	0	0	0	0	0	0	0	0	0	0	0	0	0	0	0	0	0	0	0	0	0	0
df348a600786e3a9d8322aaec0b3e1a4	0	0	0	0	0	0	0	0	0	0	0	0	0	0	0	0	0	0	0	0	0	0	0	0	0	0	0	0	0	0	0	0	0	0	0	0	0	0	0	0	0	0	0	0	0	0	0	0	0
8733d8bf1ae8cfd0208fffd7fd490996	0	0	0	0	0	0	0	0	0	0	0	0	0	0	0	0	0	0	0	0	0	0	0	0	0	0	0	0	0	0	0	0	0	0	0	0	0	0	0	0	0	0	0	0	0	0	0	0	0
0d1368cc7a33437811c891dbc7f97f00	0	0	0	0	0	0	0	0	0	0	0	0	0	0	0	0	0	0	0	0	0	0	0	0	0	0	0	0	0	0	0	0	0	0	0	0	0	0	0	0	0	0	0	0	0	0	0	0	0
c0c03749924d9495772b17c79ae3fcaa	0	0	0	0	0	0	0	0	0	0	0	0	0	0	0	0	0	0	0	0	0	0	0	0	0	0	0	0	0	0	0	0	0	0	0	0	0	0	0	0	0	0	0	0	0	0	0	0	0
6e43951043941806f4d0134d5630f014	0	0	0	0	0	0	0	0	0	0	0	0	0	0	0	0	0	0	0	0	0	0	0	0	0	0	0	0	0	0	0	0	0	0	0	0	0	0	0	0	0	0	0	0	0	0	0	0	0
a59d3b2b23c70ceac58469f6b6154763	0	0	0	0	0	0	0	0	0	0	0	0	0	0	0	0	0	0	0	0	0	0	0	0	0	0	0	0	0	0	0	0	0	0	0	0	0	0	0	0	0	0	0	0	0	0	0	0	0
44eddbbdd922c76fed6e325865a9090e	0	0	0	0	0	0	0	0	0	0	0	0	0	0	0	0	0	0	0	0	0	0	0	0	0	0	0	0	0	0	0	0	0	0	0	0	0	0	0	0	0	0	0	0	0	0	0	0	0
417a31b1c6339083c8174f019c401722	0	0	0	0	0	0	0	0	0	0	0	0	0	0	0	0	0	0	0	0	0	0	0	0	0	0	0	0	0	0	0	0	0	0	0	0	0	0	0	0	0	0	0	0	0	0	0	0	0
b075ca1926b34481ce1feb50d2f200a6	0	0	0	0	0	0	0	0	0	0	0	0	0	0	0	0	0	0	0	0	0	0	0	0	0	0	0	0	0	0	0	0	0	0	0	0	0	0	0	0	0	0	0	0	0	0	0	0	0
e6b1600a621ae93f3f8dbfe4d85d9b32	0	0	0	0	0	0	0	0	0	0	0	0	0	0	0	0	0	0	0	0	0	0	0	0	0	0	0	0	0	0	0	0	0	0	0	0	0	0	0	0	0	0	0	0	0	0	0	0	0
2fe200fe422d366782c7ccdef8d4c9b5	0	0	0	0	0	0	0	0	0	0	0	0	0	0	0	0	0	0	0	0	0	0	0	0	0	0	0	0	0	0	0	0	0	0	0	0	0	0	0	0	0	0	0	0	0	0	0	0	0
a43db966e77d648c62bfdaf23a701dd0	0	0	0	0	0	0	0	0	0	0	0	0	0	0	0	0	0	0	0	0	0	0	0	0	0	0	0	0	0	0	0	0	0	0	0	0	0	0	0	0	0	0	0	0	0	0	0	0	0
c367bb4035bbbfb51258a8c8afb652e7	0	0	0	0	0	0	0	0	0	0	0	0	0	0	0	0	0	0	0	0	0	0	0	0	0	0	0	0	0	0	0	0	0	0	0	0	0	0	0	0	0	0	0	0	0	0	0	0	0
462e6808cc3a20abc0d91adaaf5a94e2	0	0	0	0	0	0	0	0	0	0	0	0	0	0	0	0	0	0	0	0	0	0	0	0	0	0	0	0	0	0	0	0	0	0	0	0	0	0	0	0	0	0	0	0	0	0	0	0	0
9e21baafe75ff888a0d6cff3c3256445	0	0	0	0	0	0	0	0	0	0	0	0	0	0	0	0	0	0	0	0	0	0	0	0	0	0	0	0	0	0	0	0	0	0	0	0	0	0	0	0	0	0	0	0	0	0	0	0	0
1b3c9f6311106a025afe37e98ad3c59b	0	0	0	0	0	0	0	0	0	0	0	0	0	0	0	0	0	0	0	0	0	0	0	0	0	0	0	0	0	0	0	0	0	0	0	0	0	0	0	0	0	0	0	0	0	0	0	0	0
3887e4bbf714bf4161ca584ed44e373b	0	0	0	0	0	0	0	0	0	0	0	0	0	0	0	0	0	0	0	0	0	0	0	0	0	0	0	0	0	0	0	0	0	0	0	0	0	0	0	0	0	0	0	0	0	0	0	0	0
d4ea4d524beb75678d91c098e65f691b	0	0	0	0	0	0	0	0	0	0	0	0	0	0	0	0	0	0	0	0	0	0	0	0	0	0	0	0	0	0	0	0	0	0	0	0	0	0	0	0	0	0	0	0	0	0	0	0	0
ae1fc6dfc0c8dc83e23e88158624ee56	0	0	0	0	0	0	0	0	0	0	0	0	0	0	0	0	0	0	0	0	0	0	0	0	0	0	0	0	0	0	0	0	0	0	0	0	0	0	0	0	0	0	0	0	0	0	0	0	0
5bd2899110d8c49f86d11b2cd4d40abf	0	0	0	0	0	0	0	0	0	0	0	0	0	0	0	0	0	0	0	0	0	0	0	0	0	0	0	0	0	0	0	0	0	0	0	0	0	0	0	0	0	0	0	0	0	0	0	0	0
bd7583c29956840dff8c0810aa0acf29	0	0	0	0	0	0	0	0	0	0	0	0	0	0	0	0	0	0	0	0	0	0	0	0	0	0	0	0	0	0	0	0	0	0	0	0	0	0	0	0	0	0	0	0	0	0	0	0	0
68d012e83fe2a8129b7f4bf87df850c7	0	0	0	0	0	0	0	0	0	0	0	0	0	0	0	0	0	0	0	0	0	0	0	0	0	0	0	0	0	0	0	0	0	0	0	0	0	0	0	0	0	0	0	0	0	0	0	0	0
5abce3bf5ea356faa4de7dae1b399482	0	0	0	0	0	0	0	0	0	0	0	0	0	0	0	0	0	0	0	0	0	0	0	0	0	0	0	0	0	0	0	0	0	0	0	0	0	0	0	0	0	0	0	0	0	0	0	0	0
d2f07af747027683a23e40da1004911c	0	0	0	0	0	0	0	0	0	0	0	0	0	0	0	0	0	0	0	0	0	0	0	0	0	0	0	0	0	0	0	0	0	0	0	0	0	0	0	0	0	0	0	0	0	0	0	0	0
0bad6330e138dc21a45dd767749dff97	0	0	0	0	0	0	0	0	0	0	0	0	0	0	0	0	0	0	0	0	0	0	0	0	0	0	0	0	0	0	0	0	0	0	0	0	0	0	0	0	0	0	0	0	0	0	0	0	0
5503cc9d83cb4e6394d499a905b0044e	0	0	0	0	0	0	11	0	0	11	0	0	0	0	0	0	13	0	0	13	0	0	0	0	0	0	0	0	0	0	0	0	0	0	0	0	0	0	0	0	0	0	0	0	0	0	0	0	0
b46e364d2aecc073c7d0c95169447ed8	0	0	13	0	0	0	0	0	0	13	0	0	0	0	0	0	0	0	0	0	0	0	0	0	0	0	0	0	0	0	0	0	11	0	0	0	0	0	0	11	0	0	0	0	0	0	0	0	0
c9ac611b03cdfa38bfe72306edb14c57	0	0	0	0	0	0	0	0	0	0	0	0	0	0	0	0	0	0	0	0	0	0	0	0	0	0	0	0	0	0	0	0	0	24	0	0	0	0	0	24	0	0	0	0	0	0	0	0	0
5efce54b776ff83acfe405f50c84132e	17	0	0	0	0	0	0	0	0	17	0	0	0	0	0	0	0	0	0	0	0	0	0	0	0	0	0	0	0	0	0	0	0	0	0	0	7	0	0	7	0	0	0	0	0	0	0	0	0
ac014df8ad47d5dfd21f3c52b0808030	0	0	0	0	0	0	0	0	0	0	0	0	0	0	0	0	0	0	0	0	0	0	7	0	0	0	0	0	0	7	0	0	0	0	0	0	0	0	0	0	0	0	0	0	0	0	0	0	0
12dcbd73f9fce5f230394eabd0e896b9	0	0	0	0	0	0	0	0	0	0	0	0	0	0	0	0	0	0	0	0	0	0	0	0	0	24	0	0	0	24	0	0	0	0	0	0	0	0	0	0	0	0	0	0	0	0	0	0	0
884ff3520ff19aeaee7e8885065b20db	24	0	0	0	0	0	0	0	0	24	0	0	0	0	0	0	0	0	0	0	0	0	0	0	0	0	0	0	0	0	0	0	0	0	0	0	0	0	0	0	0	0	0	0	0	0	0	0	0
d06834ae5f4eb9106f6f6046498f826f	0	0	0	0	0	24	0	0	0	24	0	0	0	0	0	0	0	0	0	0	0	0	0	0	0	0	0	0	0	0	0	0	0	0	0	0	0	0	0	0	0	0	0	0	0	0	0	0	0
cf1f88cfe7485532ca6d0d6ef4ae4a1e	0	0	0	0	0	0	0	0	0	0	0	0	0	0	0	0	0	0	0	0	0	0	0	0	0	0	0	0	0	0	0	0	0	0	0	0	0	0	0	0	0	0	0	0	0	0	0	0	0
6a2c66c9a4a7b115c4269a26b345d8c7	0	0	0	0	0	0	0	0	0	0	0	0	0	0	0	0	0	0	0	0	0	0	0	0	0	0	0	0	0	0	0	0	0	0	0	0	0	0	0	0	0	0	0	0	0	0	0	0	0
e6ce0e74466020f722cdd24269bb95d8	0	0	0	0	0	0	0	0	0	0	0	0	0	0	0	0	0	0	0	0	0	0	0	0	0	0	0	0	0	0	0	0	0	0	0	0	0	0	0	0	0	0	0	0	0	0	0	0	0
8b4f3b8d9078e39140c2adfb13208882	0	0	0	0	0	0	0	0	0	0	0	0	0	0	0	0	0	0	0	0	0	0	0	0	0	0	0	0	0	0	0	0	0	0	0	0	0	0	0	0	0	0	0	0	0	0	0	0	0
d60510528415c49f40cc2808b96a5690	0	0	0	0	0	0	0	0	0	0	0	0	0	0	0	0	0	0	0	0	0	0	0	0	0	0	0	0	0	0	0	0	0	0	0	0	0	0	0	0	0	0	0	0	0	0	0	0	0
d681a3649a7e3b36296db2186cddd64b	0	0	0	0	0	0	0	0	0	0	0	0	0	0	0	0	0	0	0	0	0	0	0	0	0	0	0	0	0	0	0	0	0	0	0	0	0	0	0	0	0	0	0	0	0	0	0	0	0
7beef12faabb33fa9c7dd5968866e499	0	0	0	0	0	0	0	0	0	0	0	0	0	0	0	0	0	0	0	0	0	0	0	0	0	0	0	0	0	0	0	0	0	0	0	0	0	0	0	0	0	0	0	0	0	0	0	0	0
b5b5632ee8123c470c5d3ba99022413d	0	0	0	0	0	0	0	0	0	0	0	0	0	0	0	0	0	0	0	0	0	0	0	0	0	0	0	0	0	0	0	0	0	0	0	0	0	0	0	0	0	0	0	0	0	0	0	0	0
64fe7d06857d9c1776ad3741fa61061b	0	0	0	0	0	0	0	0	0	0	0	0	0	0	0	0	0	0	0	0	0	0	0	0	0	0	0	0	0	0	0	0	0	0	0	0	0	0	0	0	0	0	0	0	0	0	0	0	0
2f1f88a5ba8c4ea32ac4dfdc296e9cc7	0	0	0	0	0	0	0	0	0	0	0	0	0	0	0	0	0	0	0	0	0	0	0	0	0	0	0	0	0	0	0	0	0	0	0	0	0	0	0	0	0	0	0	0	0	0	0	0	0
cca94afd75bf9af31421ec27a8f8f669	0	0	0	0	0	0	0	0	0	0	0	0	0	0	0	0	0	0	0	0	0	0	0	0	0	0	0	0	0	0	0	0	0	0	0	0	0	0	0	0	0	0	0	0	0	0	0	0	0
ce08674caaf92880bb438076c7f03d05	0	0	0	0	0	0	0	0	0	0	0	0	0	0	0	0	0	0	0	0	0	0	0	0	0	0	0	0	0	0	0	0	0	0	0	0	0	0	0	0	0	0	0	0	0	0	0	0	0
870cadad5631a4e37129db0d26c61d2b	0	0	0	0	0	0	0	0	0	0	0	0	0	0	0	0	0	0	0	0	0	0	0	0	0	0	0	0	0	0	0	0	0	0	0	0	0	0	0	0	0	0	0	0	0	0	0	0	0
c3f22c32f03a59c577db8d5fa0eeb508	0	0	0	0	0	0	0	0	0	0	0	0	0	0	0	0	0	0	0	0	0	0	0	0	0	0	0	0	0	0	0	0	0	0	0	0	0	0	0	0	0	0	0	0	0	0	0	0	0
e67ae6c5f818326fdabfb712c60fabbc	0	0	0	0	0	0	0	0	0	0	0	0	0	0	0	0	0	0	0	0	0	0	0	0	0	0	0	0	0	0	0	0	0	0	0	0	0	0	0	0	0	0	0	0	0	0	0	0	0
63cb1f10ac0069aa959a568b82817658	0	0	0	0	0	0	0	0	0	0	0	0	0	0	0	0	0	0	0	0	0	0	0	0	0	0	0	0	0	0	0	0	0	0	0	0	0	0	0	0	0	0	0	0	0	0	0	0	0
486c55921868aff5ef8326be1502bda0	0	0	0	0	0	0	0	0	0	0	0	0	0	0	0	0	0	0	0	0	0	0	0	0	0	0	0	0	0	0	0	0	0	0	0	0	0	0	0	0	0	0	0	0	0	0	0	0	0
7aa0bab8912137eea84f9b037ec86ffc	0	0	0	0	0	0	0	0	0	0	0	0	0	0	0	0	0	0	0	0	0	0	0	0	0	0	0	0	0	0	0	0	0	0	0	0	0	0	0	0	0	0	0	0	0	0	0	0	0
76ebde37891bb0af8a9ee88f95d79550	0	0	0	0	0	0	0	0	0	0	0	0	0	0	0	0	0	0	0	0	0	0	0	0	0	0	0	0	0	0	0	0	0	0	0	0	0	0	0	0	0	0	0	0	0	0	0	0	0
d9fa177f5c1e5dae52fa81edf17b44f1	0	0	0	0	0	0	0	0	0	0	0	0	0	0	0	0	0	0	0	0	0	0	0	0	0	0	0	0	0	0	0	0	0	0	0	0	0	0	0	0	0	0	0	0	0	0	0	0	0
e11912b834924a4a2e7176b0f41dfaac	0	0	0	0	0	0	0	0	0	0	0	0	0	0	0	0	0	0	0	0	0	0	0	0	0	0	0	0	0	0	0	0	0	0	0	0	0	0	0	0	0	0	0	0	0	0	10	0	0
73af07981c763c3fe35d86a686b73954	0	0	0	0	0	0	0	0	0	0	0	0	0	0	0	0	0	0	0	0	0	0	0	0	0	0	0	0	0	0	0	0	0	0	0	0	0	0	0	0	0	0	0	0	0	0	0	0	0
48f6e6349f8a55b507bddc1e0f9f0f38	0	0	0	0	0	0	0	0	0	0	0	0	0	0	0	0	0	0	0	0	0	0	0	0	0	0	0	0	0	0	0	0	0	0	0	0	0	0	0	0	0	0	0	0	0	0	0	0	0
4e02bcb6e04dbe328e2cd396996f347c	0	0	0	0	0	0	0	0	0	0	0	0	0	0	0	0	0	0	0	0	0	0	0	0	0	0	0	0	0	0	0	0	18	0	0	0	0	0	0	18	0	0	0	0	0	0	0	0	0
00d7d0b0027b98683f7c2b86d6aefa34	0	0	0	0	0	0	0	0	0	0	0	0	0	0	0	0	0	0	0	0	0	0	0	0	23	0	0	0	0	23	0	0	0	0	0	0	0	0	0	0	0	0	0	0	0	0	0	0	0
561eacbd2cf38e144af2a01a22408661	0	0	0	0	0	0	9	0	0	9	0	0	0	0	0	0	0	0	0	0	0	0	0	0	0	0	0	0	0	0	0	0	0	0	0	0	0	0	0	0	0	0	0	0	0	0	0	0	0
f7df407e91af66d071ce2821a8b2f712	0	0	0	0	0	0	8	0	0	8	0	0	0	0	0	0	0	0	0	0	0	0	0	0	0	0	0	0	0	0	0	0	0	0	0	0	0	0	0	0	0	0	0	0	0	0	0	0	0
2489bc230421e92c1f356b41bd2265a0	0	0	0	0	0	0	0	0	0	0	0	0	0	0	0	0	0	0	0	0	0	0	0	0	0	0	0	0	0	0	0	0	0	0	0	0	0	0	0	0	0	0	0	0	0	0	0	0	0
4a4889542e390b2f727a6e1540a009f9	0	0	0	0	0	0	0	0	0	0	0	0	0	0	0	0	0	0	0	0	0	0	0	0	0	0	0	0	0	0	0	0	0	0	0	0	0	0	0	0	0	0	0	0	0	0	0	0	0
9ac00da3443435682693db9def6db018	0	0	0	0	0	0	0	0	0	0	0	0	0	0	0	0	0	0	0	0	0	0	0	0	0	0	0	0	0	0	0	0	0	0	0	0	0	0	0	0	0	0	0	0	0	0	0	0	0
e5ce43460aca3ab7ef727e68171a1254	0	0	0	0	0	0	0	0	0	0	0	0	0	0	0	0	0	0	0	0	0	0	0	0	0	0	0	0	0	0	0	0	0	0	0	0	0	0	0	0	0	0	0	0	0	0	0	0	0
4d9e355e7665e949431af947f749fb1c	0	0	0	0	0	0	0	0	0	0	0	0	0	0	0	0	0	0	0	0	0	0	0	0	0	0	0	0	0	0	0	0	0	0	0	0	0	0	0	0	0	0	0	0	0	0	0	0	0
72b7e6a06597e1b1b00b5694d7759c48	0	0	0	0	0	0	0	0	0	0	0	0	0	0	0	0	0	0	0	0	0	0	0	0	0	0	0	0	0	0	0	0	0	0	0	0	0	0	0	0	0	0	0	0	0	0	0	0	0
8385e65ec07355aadf790ec7a9743b13	0	0	0	0	0	0	0	0	0	0	0	0	0	0	0	0	0	0	0	0	0	0	0	0	0	0	0	0	0	0	0	0	0	0	0	0	0	0	0	0	0	0	0	0	0	0	0	0	0
bb88cf39521354bd51c38bf47f3be9a3	0	0	0	0	0	0	0	0	0	0	0	0	0	0	0	0	0	0	0	0	0	0	0	0	0	0	0	0	0	0	0	0	0	0	0	0	0	0	0	0	0	0	0	0	0	0	0	0	0
d3aaa1cb54eb52e5b11d301224b2538f	0	0	0	0	0	0	0	0	0	0	0	0	0	0	0	0	0	0	0	0	0	0	0	0	0	0	0	0	0	0	0	0	0	0	0	0	0	0	0	0	0	0	0	0	0	0	0	0	0
05c8aea735e93b1b37e376f7ef845aa7	0	0	0	0	0	0	0	0	0	0	0	0	0	0	0	0	0	0	0	0	0	0	0	0	0	0	0	0	0	0	0	0	0	0	0	0	0	0	0	0	0	0	0	0	0	0	0	0	0
ec93f54272470cd54410322d68e10f9c	0	0	0	0	0	0	0	0	0	0	0	0	0	0	0	0	0	0	0	0	0	0	0	0	0	0	0	0	0	0	0	0	0	0	0	0	0	0	0	0	0	0	0	0	0	0	0	0	0
6dac8df0bceab02efb089e98a0141537	0	0	0	0	0	0	0	0	0	0	0	0	0	0	0	0	0	0	0	0	0	0	0	0	0	0	0	0	0	0	0	0	0	0	0	0	0	0	0	0	0	0	0	0	0	0	0	0	0
76cedcee3280c76c3c72e925dd890547	0	0	0	0	0	0	0	0	0	0	0	0	0	0	0	0	0	0	0	0	0	0	0	0	0	0	0	0	0	0	0	0	0	0	0	0	0	0	0	0	0	0	0	0	0	0	0	0	0
821902aaabc96864cfc13f74c3bcbcd9	0	0	0	0	0	0	0	0	0	0	0	0	0	0	0	0	0	0	0	0	0	0	0	0	0	0	0	0	0	0	0	0	0	0	0	0	0	0	0	0	0	0	0	0	0	0	0	0	0
433d89d482801215eaa5ea44a5028516	0	0	0	0	0	0	0	0	0	0	0	0	0	0	0	0	0	0	0	0	0	0	0	0	0	0	0	0	0	0	0	0	0	0	0	0	0	0	0	0	0	0	0	0	0	0	0	0	0
a920caffdd3a39d29a13b7fb8992c6cd	0	0	0	0	0	0	0	0	0	0	0	0	0	0	0	0	0	0	0	0	0	0	0	0	0	0	0	0	0	0	0	0	0	0	0	0	0	0	0	0	0	0	0	0	0	0	0	0	0
a331399db98a4b562cce2247e8da21e9	0	0	0	0	0	0	0	0	0	0	0	0	0	0	0	0	0	0	0	0	0	0	0	0	0	0	0	0	0	0	0	0	0	0	0	0	0	0	0	0	0	0	0	0	0	0	0	0	0
32773fd5a30894023baafb85c12c334d	0	0	0	0	0	0	0	0	0	0	0	0	0	0	0	0	0	0	0	0	0	0	0	0	0	0	0	0	0	0	0	0	0	0	0	0	0	0	0	0	0	0	0	0	0	0	0	0	0
55e9faaaf775976ff7c550035fb5e295	0	0	0	0	0	0	0	0	0	0	0	0	0	0	0	0	0	0	0	0	0	0	0	0	0	0	0	0	0	0	0	0	0	0	0	0	0	0	0	0	0	0	0	0	0	0	0	0	0
c53950176e3c23085b6d008549041209	0	0	0	0	0	0	0	0	0	0	0	0	0	0	0	0	0	0	0	0	0	0	0	0	0	0	0	0	0	0	0	0	0	0	0	0	0	0	0	0	0	0	0	0	0	0	0	0	0
77df4dbe37bc14c0bf2cb85beb67a7e4	0	0	0	0	0	0	0	0	0	0	0	0	0	0	0	0	0	0	0	0	0	0	0	0	0	0	0	0	0	0	0	0	0	0	0	0	0	0	0	0	0	0	0	0	0	0	0	0	0
85ea20252fe63930ce12949a573cb94f	0	0	0	0	0	0	0	0	0	0	0	0	0	0	0	0	0	0	0	0	0	0	0	0	0	0	0	0	0	0	0	0	0	0	0	0	0	0	0	0	0	0	0	0	0	0	0	0	0
ca94eb987d266cca9ed04cb79e8f5ee4	0	0	0	0	0	0	0	0	0	0	0	0	0	0	0	0	0	0	0	0	0	0	0	0	0	0	0	0	0	0	0	0	0	0	0	0	0	0	0	0	0	0	0	0	0	0	0	0	0
ead4e09b5ba3bf78946221c96285be16	0	0	0	0	0	0	0	0	0	0	0	0	0	0	0	0	0	0	0	0	0	0	0	0	0	0	0	0	0	0	0	0	0	0	0	0	0	0	0	0	0	0	0	0	0	0	0	0	0
3ee676f76035226c8493e6af7fe27edb	0	0	0	0	0	0	0	0	0	0	0	0	0	0	0	0	0	0	0	0	0	0	0	0	0	0	0	0	0	0	0	0	0	0	0	0	0	0	0	0	0	0	0	0	0	0	0	0	0
9c4cecf4ded10753b3579c53979b59dd	0	0	0	0	0	0	0	0	0	0	0	0	0	0	0	0	0	0	0	0	0	0	0	0	0	0	0	0	0	0	0	0	0	0	0	0	0	0	0	0	0	0	0	0	0	0	0	0	0
f435b4e85f06e0222007ca8ee7e87877	0	0	0	0	0	0	0	0	0	0	0	0	0	0	0	0	0	0	0	0	0	0	0	0	0	0	0	0	0	0	0	0	0	0	0	0	0	0	0	0	0	0	0	0	0	0	0	0	0
331247d7ff5b18b3c0e9ee5487936fe0	0	0	0	0	0	0	0	0	0	0	0	0	0	0	0	0	0	0	0	0	0	0	0	0	0	0	0	0	0	0	0	0	0	0	0	0	0	0	0	0	0	0	0	0	0	0	0	0	0
9384abd03260635717d9388ffea13dcd	0	0	0	0	0	0	0	0	0	0	0	0	0	0	0	0	0	0	0	0	0	0	0	0	0	0	0	0	0	0	0	0	0	0	0	0	0	0	0	0	0	0	0	0	0	0	0	0	0
2aeaafa9ea3b034541d317a59901825c	0	0	0	0	0	0	0	0	0	0	0	0	0	0	0	0	0	0	0	0	0	0	0	0	0	0	0	0	0	0	0	0	0	0	0	0	0	0	0	0	0	0	0	0	0	0	0	0	0
97fdde8fb26efdaa77008b1356e4cfd7	0	0	0	0	0	0	0	0	0	0	0	0	0	0	0	0	0	0	0	0	0	0	0	0	0	0	0	0	0	0	0	0	0	0	0	0	0	0	0	0	0	0	0	0	0	0	0	0	0
4e6efe9fdbac40711324b500f431da85	0	0	0	0	0	0	0	0	0	0	0	0	0	0	0	0	0	0	0	0	0	0	0	0	0	0	0	0	0	0	0	0	0	0	0	0	0	0	0	0	0	0	0	0	0	0	0	0	0
f09cad5b79f45792399c178942ce6eee	0	0	0	0	0	0	0	0	0	0	0	0	0	0	0	0	0	0	0	0	0	0	0	0	0	0	0	0	0	0	0	0	0	0	0	0	0	0	0	0	0	0	0	0	0	0	0	0	0
97a75daa4b1a59554f5997a4747d458b	0	0	0	0	0	0	0	0	0	0	0	0	0	0	0	0	0	0	0	0	0	0	0	0	0	0	0	0	0	0	0	0	0	0	0	0	0	0	0	0	0	0	0	0	0	0	0	0	0
6a7dc07bf627a9c04bed3d34fd4f3827	0	0	0	0	0	0	0	0	0	0	0	0	0	0	0	0	0	0	0	0	0	0	0	0	0	0	0	0	0	0	0	0	0	0	0	0	0	0	0	0	0	0	0	0	0	0	0	0	0
05711c67dba8bc48784a7ea7dd836f2c	0	0	0	0	0	0	0	0	0	0	0	0	0	0	0	0	0	0	0	0	0	0	0	0	0	0	0	0	0	0	0	0	0	0	0	0	0	0	0	0	0	0	0	0	0	0	0	0	0
412fefa86046ae6a731239fbb830c418	0	0	0	0	0	0	0	0	0	0	0	0	0	0	0	0	0	0	0	0	0	0	0	0	0	0	0	0	0	0	0	0	0	0	0	0	0	0	0	0	0	0	0	0	0	0	0	0	0
6060df1c5af89081605a9c0f2bfa7c54	0	0	0	0	0	0	0	0	0	0	0	0	0	0	0	0	0	0	0	0	0	0	0	0	0	0	0	0	0	0	0	0	0	0	0	0	0	0	0	0	0	0	0	0	0	0	0	0	0
7b5e39a50333231a10811470023173d7	0	0	0	0	11	0	0	0	0	11	0	0	0	0	0	0	0	0	0	0	0	0	8	0	0	0	0	0	0	8	0	0	0	0	0	0	0	0	0	0	0	0	0	0	0	0	0	0	0
530b27c3e020bddd35d41cb8f1cd29d4	0	0	0	0	0	0	0	0	0	0	0	22	0	0	0	0	0	0	0	22	0	0	0	0	0	0	0	0	0	0	0	0	0	0	0	0	0	0	0	0	0	0	0	0	0	0	0	0	0
8b6a75b2c79bad6d6bae4961f708a083	0	0	0	0	0	0	0	0	0	0	0	0	0	0	0	0	0	18	0	18	0	0	0	0	0	0	0	0	0	0	0	0	0	0	0	0	0	0	0	0	0	0	0	0	0	0	0	0	0
9cb15bc43d947d424b46e97d9661a79f	0	0	0	0	0	0	0	0	0	0	0	0	0	0	0	0	0	0	0	0	0	0	0	0	0	0	0	0	0	0	0	0	0	0	0	0	0	0	0	0	0	0	0	0	0	0	0	0	0
bd5111120f124092b0e580f3e101f787	0	0	0	0	0	0	0	0	0	0	0	0	0	0	0	0	0	0	0	0	0	0	0	0	0	0	0	0	0	0	22	0	0	0	0	0	0	0	0	22	0	0	0	0	0	0	0	0	0
6a6b5a561d033aa8e9f11900753d7cd5	0	0	0	0	0	0	0	0	0	0	0	0	0	0	0	0	0	0	0	0	0	0	0	0	0	0	0	0	0	0	0	0	0	0	22	0	0	0	0	22	0	0	0	0	0	0	0	0	0
f1b91492b71f9830d2ef657ed35f37c8	17	0	0	0	0	0	0	0	0	17	0	0	0	0	0	0	0	0	0	0	0	0	0	0	0	0	0	0	0	0	0	0	0	0	0	0	0	0	0	0	0	0	0	0	0	0	0	0	0
32fda6960a2d1159ea2ae2cef1b91023	0	22	0	0	0	0	0	0	0	22	0	0	0	0	0	0	0	0	0	0	0	0	0	0	0	0	0	0	0	0	0	0	0	0	0	0	0	0	0	0	0	0	0	0	0	0	0	0	0
18ffc3c7d12f61a3f46f304978f0a418	0	0	0	13	0	0	0	0	0	13	0	0	0	0	0	0	0	0	0	0	0	0	0	0	0	0	0	0	0	0	0	0	0	0	0	0	0	0	0	0	0	0	0	0	0	0	0	0	0
bccc867fa27de08f4a3c31c1cd1edfc5	0	0	0	0	11	0	0	0	0	11	0	0	0	0	0	0	0	0	0	0	0	0	0	0	0	0	0	0	0	0	0	0	0	0	0	0	0	0	0	0	0	0	0	0	0	0	0	0	0
1e49fc22e2171d278bad9b70ee7e053a	0	0	0	0	0	0	0	0	22	22	0	0	0	0	0	0	0	0	0	0	0	0	0	0	0	0	0	0	0	0	0	0	0	0	0	0	0	0	0	0	0	0	0	0	0	0	0	0	0
f66ffd1f21cca06195ca21dfd97c98e7	0	0	0	0	0	0	0	0	0	0	0	0	0	0	0	0	0	0	0	0	0	0	0	0	0	0	0	0	0	0	0	0	0	0	0	0	0	0	0	0	0	0	0	0	0	0	0	0	0
9a02c4504bb32d21749e277948b3bff8	0	0	0	0	0	0	0	0	0	0	0	0	0	0	0	0	0	0	0	0	0	0	0	0	0	0	0	0	0	0	0	0	0	0	0	0	0	0	0	0	0	0	0	0	0	0	0	0	0
b1a01892b0ea118de5fb3539735753a6	0	0	0	0	0	0	0	0	0	0	0	0	0	0	0	0	0	0	0	0	0	0	0	0	0	0	0	0	0	0	0	0	0	0	0	0	0	0	0	0	0	0	0	0	0	0	0	0	0
1a7dc181acce71ea67adec2534946588	0	0	0	0	0	0	0	0	0	0	0	0	0	0	0	0	0	0	0	0	0	0	0	0	0	0	0	0	0	0	0	0	0	0	0	0	0	0	0	0	0	0	0	0	0	0	0	0	0
307c3a60d0c11291b6ceca776a0a30db	0	0	0	0	0	0	0	0	0	0	0	0	0	0	0	0	0	0	0	0	0	0	0	0	0	0	0	0	0	0	0	0	0	0	0	0	0	0	0	0	0	0	0	0	0	0	0	0	0
7b1c6cade17d76305cc264ff37774ad3	0	0	0	0	0	0	0	0	0	0	0	0	0	0	0	0	0	0	0	0	0	0	0	0	0	0	0	0	0	0	0	0	0	0	0	0	0	0	0	0	0	0	0	0	0	0	0	0	0
53b4723433a4369362455f28c9c797af	0	0	0	0	0	0	0	0	0	0	0	0	0	0	0	0	0	0	0	0	0	0	0	0	0	0	0	0	0	0	0	0	0	0	0	0	0	0	0	0	0	0	0	0	0	0	0	0	0
edb44e9147f76d0995809f46278921d2	0	0	0	0	0	0	0	0	0	0	0	0	0	0	0	0	0	0	0	0	0	0	0	0	0	0	0	0	0	0	0	0	0	0	0	0	0	0	0	0	0	0	0	0	0	0	0	0	0
691a4ffc68ce66fd4ce01d93c180d8aa	0	0	0	0	0	0	0	0	0	0	0	0	0	0	0	0	0	0	0	0	0	0	0	0	0	0	0	0	0	0	0	0	0	0	0	0	0	0	0	0	0	0	0	0	0	0	0	0	0
1e4670f7718f097aaf2e60cec8401090	0	0	0	0	0	0	0	0	0	0	0	0	0	0	0	0	0	0	0	0	0	0	0	0	0	0	0	0	0	0	0	0	0	0	0	0	0	0	0	0	0	0	0	0	0	0	0	0	0
47fae7d37ba06250af50d08da99d2182	0	0	0	0	0	0	0	0	0	0	0	0	0	0	0	0	0	0	0	0	0	0	0	0	0	0	0	0	0	0	0	0	0	0	0	0	0	0	0	0	0	0	0	0	0	0	0	0	0
35f18dfe9e41988a58795754c311e40b	0	0	0	0	0	0	0	0	0	0	0	0	0	0	0	0	0	0	0	0	0	0	0	0	0	0	0	0	0	0	0	0	0	0	0	0	0	0	0	0	0	0	0	0	0	0	0	0	0
ec3e0361da84bc7cbc0742cfd99992cc	0	0	0	0	0	0	0	0	0	0	0	0	0	0	0	0	0	0	0	0	0	0	0	0	0	0	0	0	0	0	0	0	0	0	0	0	0	0	0	0	0	0	0	0	0	0	0	0	0
eef3f836d562ddc0436132ec8446c1a0	0	0	0	0	0	0	0	0	0	0	0	0	0	0	0	0	0	0	0	0	0	0	0	0	0	0	0	0	0	0	0	0	0	0	0	0	0	0	0	0	0	0	0	0	0	0	0	0	0
d1e1ab0c394947e39cf3ece8bfbd49d7	0	0	0	0	0	0	0	0	0	0	0	0	0	0	0	0	0	0	0	0	0	0	0	0	0	0	0	0	0	0	0	0	0	0	0	0	0	0	0	0	0	0	0	0	0	0	0	0	0
76ef7c282d1ae92668029a79ec9fddf2	0	0	0	0	0	0	0	0	0	0	0	0	0	0	0	0	0	0	0	0	0	0	0	0	0	0	0	0	0	0	0	0	0	0	0	0	0	0	0	0	0	0	0	0	0	0	0	0	0
175c71bd589e6f46c079d25ee5e923f4	0	0	0	0	0	0	0	0	0	0	0	0	0	0	0	0	0	0	0	0	0	0	0	0	0	0	0	0	0	0	0	0	0	0	0	0	0	0	0	0	0	0	0	0	0	0	0	0	0
848eee2a937d40cbde8ad9fcc7708a7f	0	0	0	0	0	0	0	0	0	0	0	0	0	0	0	0	0	0	0	0	0	0	0	0	0	0	0	0	0	0	0	0	0	0	0	0	0	0	0	0	0	0	0	0	0	0	0	0	0
22435c3708a9f561b62ea3bece12e1bf	0	0	0	0	0	0	0	0	0	0	0	0	0	0	0	0	0	0	0	0	0	0	0	0	0	0	0	0	0	0	0	0	0	0	0	0	0	0	0	0	0	0	0	0	0	0	0	0	0
b9577bbadf4f32afafb00552669e2707	0	0	0	0	0	0	0	0	0	0	0	0	0	0	0	0	0	0	0	0	0	0	0	0	0	0	0	0	0	0	0	0	0	0	0	0	0	0	0	0	0	0	0	0	0	0	0	0	0
e6828b648aa21850a58f782ee035f585	0	0	0	0	0	0	0	0	0	0	0	0	0	0	0	0	0	0	0	0	0	0	0	0	0	0	0	0	0	0	0	0	0	0	0	0	0	0	0	0	0	0	0	0	0	0	0	0	0
a63aea31f195cbfc5e4fb345b2826638	0	0	0	0	0	0	0	0	0	0	0	0	0	0	0	0	0	0	0	0	0	0	0	0	0	0	0	0	0	0	0	0	0	0	0	0	0	0	0	0	0	0	0	0	0	0	0	0	0
a4f7639d582f21651599a6b852d396aa	0	0	0	0	0	0	0	0	0	0	0	0	0	0	0	0	0	0	0	0	0	0	0	0	0	0	0	0	0	0	0	0	0	0	0	0	0	0	0	0	0	0	0	0	0	0	0	0	0
b441e6bcc1b311bf4cea5c718ebf20d3	0	0	0	0	0	0	0	0	0	0	0	0	0	0	0	0	0	0	0	0	0	0	0	0	0	0	0	0	0	0	0	0	0	0	0	0	0	0	0	0	0	0	0	0	0	0	0	0	0
2ffb4e4832a2114d1757f15ec838fc3b	0	0	0	0	0	0	0	0	0	0	0	0	0	0	0	0	0	0	0	0	0	0	0	0	0	0	0	0	0	0	0	0	0	0	0	0	0	0	0	0	0	0	0	0	0	0	0	0	0
61076893a815261985ac25ab1456a5bd	0	0	0	0	0	0	0	0	0	0	0	0	0	0	0	0	0	0	0	0	0	0	0	0	0	0	0	0	0	0	0	0	0	0	0	0	0	0	0	0	0	0	0	0	0	0	0	0	0
acc6a8dec22d5d23b80439f3a7e6ce43	0	0	0	0	0	0	0	0	0	0	0	0	0	0	0	0	0	0	0	0	0	0	0	0	0	0	0	0	0	0	0	0	0	0	0	0	0	0	0	0	6	0	0	0	0	0	0	0	0
81af89288d42a34f81d57718ae83cad6	0	0	0	0	0	0	0	0	0	0	0	0	0	0	0	0	0	0	0	0	0	0	0	0	0	0	0	0	0	0	0	0	0	0	0	0	0	0	13	13	0	0	8	0	0	0	0	0	0
9c2c4fca69e34a1d0eb29b3703eb88d0	0	0	0	0	0	0	0	0	0	0	0	0	0	0	0	0	0	0	0	0	0	0	0	0	0	0	0	0	0	0	0	0	0	0	0	0	0	0	0	0	0	0	0	7	0	0	0	0	0
f58346ffc0c4f70a41a6986c8ec3c975	0	0	0	0	0	0	0	0	0	0	0	0	0	0	0	0	0	0	0	0	0	0	0	0	0	0	0	0	0	0	0	0	0	0	0	0	0	0	0	0	0	0	0	0	9	0	0	0	0
eb9a75be57d10fc5b40304f4c4aa1c15	0	0	0	0	0	0	0	0	0	0	0	0	0	21	0	0	0	0	0	21	0	0	0	0	0	0	0	0	0	0	0	0	0	0	0	0	0	0	0	0	0	0	0	0	0	0	0	0	0
2ea3471fe7f09d787038c282036af1f9	0	0	0	0	0	0	0	0	0	0	0	0	0	0	0	4	0	0	0	4	0	0	0	0	0	0	0	0	0	0	0	0	0	0	0	0	0	0	0	0	0	0	0	0	0	0	0	0	0
8d9c122d079d13e8cc0ba46bce006b2f	0	0	0	0	0	5	0	0	0	5	0	0	0	0	0	0	0	8	0	8	0	0	0	0	0	0	0	0	0	0	0	0	0	0	0	0	0	0	0	0	0	0	0	0	0	0	0	0	0
b99e10b8d06698d7c982ded30bb157e1	0	0	0	0	0	0	0	0	0	0	0	0	0	0	0	0	0	0	0	0	0	0	0	0	0	0	0	0	0	0	0	0	0	0	0	0	0	0	0	0	0	0	0	0	0	0	0	0	0
b81964316622c2bebaddeaea36bd9a70	0	0	0	0	0	0	0	0	0	0	0	0	0	0	0	0	0	0	0	0	0	0	0	0	0	0	0	0	0	0	0	0	0	0	0	0	0	0	0	0	0	0	0	0	0	0	0	0	0
35129a2b93d97376ed1d6d9ba6634c49	0	0	0	0	0	0	0	0	0	0	0	0	0	0	0	0	0	0	0	0	0	0	0	0	0	0	0	0	0	0	0	0	10	0	0	0	0	0	0	10	0	0	0	0	0	0	0	0	0
7bfef212809d64f972ed20d9c87a6a3a	21	0	0	0	0	0	0	0	0	21	0	0	0	0	0	0	0	0	0	0	0	0	0	0	0	0	0	0	0	0	0	0	0	0	0	0	0	0	0	0	0	0	0	0	0	0	0	0	0
6f27c4239a36539e19e76b0846b4e1e4	21	0	0	0	0	0	0	0	0	21	0	0	0	0	0	0	0	0	0	0	0	0	0	0	0	0	0	0	0	0	0	0	0	0	0	0	0	0	0	0	0	0	0	0	0	0	0	0	0
8f7ff76468c880be95185a2cf8ac7edb	0	0	0	0	0	0	0	0	17	17	0	0	0	0	0	0	0	0	0	0	0	0	0	0	0	0	0	0	0	0	0	0	0	0	0	0	0	0	0	0	0	0	0	0	0	0	0	0	0
4d1c917e8f2e8505613384525c440012	0	0	0	0	0	0	0	0	0	0	0	0	0	0	0	0	0	0	0	0	0	0	0	0	0	0	0	0	0	0	0	0	0	0	0	0	0	0	0	0	0	0	0	0	0	0	0	0	0
12b5b574415cf7aab9e0c8c7df41c73a	0	0	0	0	0	0	0	0	0	0	0	0	0	0	0	0	0	0	0	0	0	0	0	0	0	0	0	0	0	0	0	0	0	0	0	0	0	0	0	0	0	0	0	0	0	0	0	0	0
e92b6b5fe01a0951539cdf0e79de6e39	0	0	0	0	0	0	0	0	0	0	0	0	0	0	0	0	0	0	0	0	0	0	0	0	0	0	0	0	0	0	0	0	0	0	0	0	0	0	0	0	0	0	0	0	0	0	0	0	0
f9eeac59876eb76fbe9ac7fd1a19abf6	0	0	0	0	0	0	0	0	0	0	0	0	0	0	0	0	0	0	0	0	0	0	0	0	0	0	0	0	0	0	0	0	0	0	0	0	0	0	0	0	0	0	0	0	0	0	0	0	0
fdd872c10f8c6116a2c55d714f70b921	0	0	0	0	0	0	0	0	0	0	0	0	0	0	0	0	0	0	0	0	0	0	0	0	0	0	0	0	0	0	0	0	0	0	0	0	0	0	0	0	0	0	0	0	0	0	0	0	0
ab3c61a572c02fb1d404ac2dcdbd8b9c	0	0	0	0	0	0	0	0	0	0	0	0	0	0	0	0	0	0	0	0	0	0	0	0	0	0	0	0	0	0	0	0	0	0	0	0	0	0	0	0	0	0	0	0	0	0	0	0	0
b57f497630e905e935e6ad29708f0f19	0	0	0	0	0	0	0	0	0	0	0	0	0	0	0	0	0	0	0	0	0	0	0	0	0	0	0	0	0	0	0	0	0	0	0	0	0	0	0	0	0	0	0	0	0	0	0	0	0
b7f37add0c1071b11a72b4f11d857c4a	0	0	0	0	0	0	0	0	0	0	0	0	0	0	0	0	0	0	0	0	0	0	0	0	0	0	0	0	0	0	0	0	0	0	0	0	0	0	0	0	0	0	0	0	0	0	0	0	0
ad8a2751bf93ec7890aba6af25d208df	0	0	0	0	0	0	0	0	0	0	0	0	0	0	0	0	0	0	0	0	0	0	0	0	0	0	0	0	0	0	0	0	0	0	0	0	0	0	0	0	0	0	0	0	0	0	0	0	0
81def433abe9a0e51e60bf1f9df1d2c6	0	0	0	0	0	0	0	0	0	0	0	0	0	0	0	0	0	0	0	0	0	0	0	0	0	0	0	0	0	0	0	0	0	0	0	0	0	0	0	0	0	0	0	0	0	0	0	0	0
de172463183a6a2695e141dcca090616	0	0	0	0	0	0	0	0	0	0	0	0	0	0	0	0	0	0	0	0	0	0	0	0	0	0	0	0	0	0	0	0	0	0	0	0	0	0	0	0	0	0	0	0	0	0	0	0	0
ae32d2a19a20ea884fb4756ac559aa96	0	0	0	0	0	0	0	0	0	0	0	0	0	0	0	0	0	0	0	0	0	0	0	0	0	0	0	0	0	0	0	0	0	0	0	0	0	0	0	0	0	0	0	0	0	0	0	0	0
13e53dc7a573b1dca5d73fa278723aee	0	0	0	0	0	0	0	0	0	0	0	0	0	0	0	0	0	0	0	0	0	0	0	0	0	0	0	0	0	0	0	0	0	0	0	0	0	0	0	0	0	0	0	0	0	0	0	0	0
cfc46bf9a68dc503c4f937cd13169da9	0	0	0	0	0	0	0	0	0	0	0	0	0	0	0	0	0	0	0	0	0	0	0	0	0	0	0	0	0	0	0	0	0	0	0	0	0	0	0	0	0	0	0	0	0	0	0	0	0
232a5a09b9c04be6ddaa1869f003029a	0	0	0	0	0	0	0	0	0	0	0	0	0	0	0	0	0	0	0	0	0	0	0	0	0	0	0	0	0	0	0	0	0	0	0	0	0	0	0	0	0	0	0	0	0	0	0	0	0
a653ad9cc7ef5a0141d993deea846bda	0	0	0	0	0	0	0	0	0	0	0	0	0	0	0	0	0	0	0	0	0	0	0	0	0	0	0	0	0	0	0	0	0	0	0	0	0	0	0	0	0	0	0	0	0	0	0	0	0
2d0f14d336f82b318a25d15f20fd390f	0	0	0	0	0	0	0	0	0	0	0	0	0	0	0	0	0	0	0	0	0	0	0	0	0	0	0	0	0	0	0	0	0	0	0	0	0	0	0	0	0	0	0	0	0	0	0	0	0
2f13456486d121e2f5a767e367f1c0fa	0	0	0	0	0	0	0	0	0	0	0	0	0	0	0	0	0	0	0	0	0	0	0	0	0	0	0	0	0	0	0	0	0	0	0	0	0	0	0	0	0	0	0	0	0	0	0	0	0
e307189dd9f92551c24a34e33326f96d	0	0	0	0	0	0	0	0	0	0	0	0	0	0	0	0	0	0	0	0	0	0	0	0	0	0	0	0	0	0	0	0	0	0	0	0	0	0	0	0	0	0	0	0	0	0	0	0	0
[truncated: 1,957 more rows]
[truncated: 31 more columns]

## Sheet: LR2_36_01
Genotype	LRII36_01
Day	Day1			Day2			Day3				Day1			Day2			Day3				Day1			Day2			Day3				Day1		Day2			Day3				Day1			Day2			Day3
Replica	R1	R2	R3	R1	R2	R3	R1	R2	R3		R1	R2	R3	R1	R2	R3	R1	R2	R3		R1	R2	R3	R1	R2	R3	R1	R2	R3		R2	R3	R1	R2	R3	R1	R2	R3		R1	R2	R3	R1	R2	R3	R1	R2	R3
Treatment	Control	Control	Control	Control	Control	Control	Control	Control	Control	Control_total	PET	PET	PET	PET	PET	PET	PET	PET	PET	PET_total	PFOS	PFOS	PFOS	PFOS	PFOS	PFOS	PFOS	PFOS	PFOS	PFOS_total	PFOA	PFOA	PFOA	PFOA	PFOA	PFOA	PFOA	PFOA	PFOA_total	PET_PFOA	PET_PFOA	PET_PFOA	PET_PFOA	PET_PFOA	PET_PFOA	PET_PFOA	PET_PFOA	PET_PFOA	PET_PFOA_total
5a8e8257739ac2a1b52a438d5c6f2f18	37295	145554	61036	19251	79730	11050	55662	69977	121909	601464	245095	17530	284443	195816	76738	147058	22020	71767	240	1060707	268882	59529	268104	82335	318205	147358	98316	237474	162092	1642295	510306	164925	55756	309059	253446	77290	98736	205946	1675464	177483	325414	203684	67724	53536	181933	79371	96332	83422	1268899
469e8ac376b9694e577c762d2acf85af	24040	98235	42507	13286	56578	7669	37830	49961	91575	421681	158708	12059	192379	135901	55615	107459	15621	51158	167	729067	183484	40540	186118	56391	210442	101055	66260	157699	120248	1122237	348995	115014	35596	208993	170774	54042	64683	145458	1143555	195361	363556	224963	70137	57973	198074	87751	106091	94406	1398312
f2608b2964c358709ab061884c2ef05c	271812	162259	189347	216390	95759	102959	347302	86998	0	1472826	432316	12752	59235	139964	137526	73591	266882	312137	386	1434789	228867	0	282163	254856	67757	266795	168286	157154	138371	1564249	9028	226153	292788	32299	255652	249950	125223	0	1191093	62118	32074	59944	128293	84031	66381	87739	55663	70943	647186
d958ddfb766fa657f21810668052c8ff	123616	79003	88894	99186	43783	49094	153239	41012	59213	737040	187739	6065	27633	64879	69938	40952	123876	143484	195	664761	104788	408	141362	119489	33146	123308	77110	73943	68737	742291	4613	111583	133006	15258	109903	113542	53694	0	541599	64116	33079	62417	126975	86982	68453	91280	58316	75897	667515
35a08b2cd4ea31983ded4d916e058977	0	0	0	0	0	0	0	0	0	0	0	0	0	0	0	0	0	0	0	0	0	0	0	0	0	0	0	0	0	0	0	0	0	0	0	0	0	194784	194784	0	0	0	0	0	0	0	0	0	0
27ed4ea5d922bfb4bbe8bb7bcf41d318	0	0	0	0	0	0	0	0	0	0	0	0	0	0	0	0	0	0	0	0	0	0	0	0	0	0	0	0	0	0	0	0	0	0	0	0	0	81025	81025	0	0	0	0	0	0	0	0	0	0
9888dac64cbf7a4cabbb7323955476ed	18434	125478	34273	128876	121677	109345	160009	213457	69036	980585	83096	2064	89064	54553	40164	134822	142980	146551	696	693990	38880	272	55549	40202	25824	105284	135728	31800	148949	582488	2391	10578	74610	7024	33268	175318	92087	62716	457992	14417	1453	6103	14850	10329	69443	36018	41578	85521	279712
f4519a10d29b41fcb29db4e9cb3653f6	8483	61603	15926	59453	55930	51834	73184	100735	31647	458795	36823	1011	41577	24293	20785	75931	67005	68600	295	336320	17922	147	28165	18494	12929	49491	61679	14942	74114	277883	1140	5256	34017	3382	14418	80057	40173	26318	204761	14899	1406	5914	15116	10669	72953	37583	44048	91563	294151
326481378072da6f54d5b92576cc3a72	27163	6366	53912	41073	6415	23283	11680	7394	41006	218292	35423	354	7530	5650	5094	23374	115626	3349	30	196430	20455	2274	46598	21601	29816	88506	11955	34054	34849	290108	66683	12822	27206	27656	18266	80434	41326	23488	297881	4312	290	13273	1490	687	2106	1021	237	0	23416
a00e4532c96e71ed11f60b48835f5135	4333	16059	7668	2530	9981	1467	8012	9949	17048	77047	27160	2109	43295	25508	9921	21312	2440	7814	24	139583	35014	7947	33777	11085	39010	19396	13334	29541	20953	210057	63013	20733	7010	42631	37069	10146	10851	28846	220299	21284	48049	29316	9328	7277	24502	9611	12540	9987	171894
0c4d8d981ba24a3eb077fef905a7773c	2765	11062	5282	1668	7132	1022	5422	7099	12960	54412	17731	1473	29206	18068	7075	15645	1688	5706	0	96592	23996	5536	23332	7513	26059	13517	9219	19425	15703	144300	42660	14437	4632	29141	24953	7177	7138	20344	150482	23442	53404	32128	9562	7920	26867	10543	14326	11069	189261
675abe33b6674fd101b47ad9e4c26f3e	13510	3259	27068	21080	3283	12084	5915	3705	20236	110140	17171	185	3729	2685	2745	14206	59921	1760	0	102402	10079	1030	25900	10853	15128	44137	6053	17055	18775	149010	32714	6999	12816	13112	8654	40047	19663	10699	144704	4356	268	13696	1426	717	2181	1090	266	20	24020
376ef64373e694da0ecea919fc5124d9	51948	21483	7691	56320	66188	518	2044	1472	1180	208844	41846	1201	6036	89898	141372	3222	3232	18117	0	304924	12501	703	3742	59127	48575	306	908	10152	151	136165	6560	3061	25686	53558	1098	1377	1815	3236	96391	3769	8216	2300	72507	70407	413	2258	2752	13	162635
d07e9b0a27ac930f584ba34c40aa80bb	33742	14114	5154	38523	46814	416	1373	997	860	141993	26880	811	3957	61292	101511	2271	2307	13077	10	212116	8392	493	2554	40237	31992	198	648	6588	98	91200	4491	1988	16473	35781	772	880	1151	2229	63765	3785	8569	2445	73628	75470	443	2443	2949	14	169746
02be874404ee521287f13aa4484c39e5	24346	40081	3276	29969	52157	1474	8158	6604	1307	167372	7519	354	39818	11123	33465	16779	1193	10556	109	120916	7476	817	22991	13293	15693	1574	2048	10987	1731	76610	12942	5444	13698	17976	4225	10473	8427	4677	77862	2905	3351	8489	3712	8640	2555	1902	1855	109	33518
e7ac45e0aeb46bb50e16a6f7df0ada78	11844	20333	1567	15124	25478	727	4047	3402	646	83168	3655	173	18759	5172	18363	10238	674	5188	37	62259	3613	348	12153	6711	7516	729	1017	5571	1020	38678	6302	2801	6486	8399	1907	5236	3938	2088	37157	3044	3458	8198	3594	8749	2542	1958	1946	107	33596
ea0800a3c11a1cea9d679fdf081d0e0d	129	1682	40910	98	51	71324	658	164	5711	120727	245	9	8499	131	68	42889	129	78	203	52251	138	68	350	205	679	2832	289	731	852	6144	3477	1567	21	208	63	116	2104	482	8038	37	0	65	50	34	1256	1881	254	62	3639
8341894fc01951f1782e1b8a2866749b	3235	3684	7366	8271	4273	3060	2728	1718	3090	37425	10957	374	2347	1496	2339	573	4000	3279	0	25365	3973	132	11554	1945	4735	4809	2342	1934	4207	35631	1374	6627	1715	1053	5169	3296	3931	2784	25949	1079	182	1099	508	418	539	562	548	0	4935
4fcf7133f087bcb5bcc508334224bf3c	744	274	587	471	391	5297	186	121	19954	28025	254	0	3460	357	152	940	149	457	40	5809	631	244	25803	842	2782	5779	513	5395	26521	68510	1133	12408	1027	751	35183	3939	932	61403	116776	93	1016	2879	335	239	2161	452	448	1303	8926
545100c39ff4b62e59f1d6fee9387fdc	106	1111	28027	79	35	50311	429	101	4250	84449	171	0	5739	80	55	31563	89	50	132	37879	79	57	270	144	465	2022	206	489	640	4372	2377	1046	17	151	40	89	1272	367	5359	37	4	69	66	0	1359	2009	255	35	3834
570355999c59916844b6408814e4eb35	0	1660	33374	105	33	55772	387	121	4730	96182	264	0	6658	103	67	33170	126	78	150	40616	70	46	370	138	412	2254	287	704	686	4967	2578	1503	33	161	82	101	1640	406	6504	51	0	58	28	0	976	1570	252	47	2982
94382f21781a6dafd1dc7f03dec47aa8	590	91	1142	668	617	376	534	74	1487	5579	95	0	4108	199	508	1020	105	367	55	6457	413	370	1133	2658	1871	2546	957	3251	3593	16792	929	2724	1668	1975	5040	3646	2494	7009	25485	808	564	1244	804	357	933	840	412	19	5981
0016dade7442fdc5b9314100492fda7a	0	1083	22842	0	41	39398	258	89	3563	67274	185	0	4452	68	49	24035	85	50	91	29015	59	39	228	86	266	1607	187	435	551	3458	1861	1049	22	97	0	62	1145	293	4529	49	0	58	25	0	1199	1671	242	38	3282
b819828d38c37cddba19e7c079b53769	16041	11032	2565	6912	5480	51	0	0	103	42184	38747	1479	723	7723	7199	161	0	91	0	56123	15424	1161	194	7427	4156	46	78	102	78	28666	2840	988	1285	2392	378	24	38	253	8198	3140	2569	182	1452	3344	0	9	198	0	10894
e148a9145c7b24eb5989679e89ea8ae7	1465	1837	3610	3822	1943	1431	1307	805	1438	17658	4930	163	1150	705	1239	359	1866	1527	0	11939	1885	74	5922	910	2373	2305	1133	941	2098	17641	656	3263	863	497	2344	1597	1745	1215	12180	1017	196	1084	453	422	550	528	532	0	4782
35cd44f82487cb84024cd15ba68a56ae	279	44	603	317	303	188	245	34	728	2741	41	0	2000	137	289	642	52	201	30	3392	172	196	662	1327	935	1255	436	1530	1848	8361	400	1392	730	975	2354	1789	1146	3275	12061	877	564	1308	794	377	968	892	424	15	6219
9f65f304cfe1ae8488ce89a095cd03c1	375	134	309	241	166	2763	126	74	10229	14417	125	0	1658	202	91	596	92	244	0	3008	296	109	14119	416	1492	3033	292	2697	14779	37233	595	6868	513	368	16270	2138	483	28477	55712	98	984	2988	327	229	2020	503	477	1382	9008
66b3cb40baa725dda42e229cae8267a7	1946	4929	718	7432	10344	272	1178	608	1266	28693	11543	371	199	7702	6784	516	308	2367	17	29807	1696	940	838	4692	10893	390	1006	6754	151	27360	2972	200	3476	7943	548	1881	3481	1174	21675	999	391	61	1115	1634	64	222	624	0	5110
9f0a08939646fd773271c9a6f82b1781	956	755	1558	800	193	898	119	45	301	5625	1333	33	3014	271	270	725	78	144	0	5868	1683	557	6636	3396	3263	1243	781	4402	319	22280	6822	3278	1408	4436	1231	4038	2338	1131	24682	736	6269	4419	444	346	657	232	167	36	13306
b21dff2364c1fd87ea847570b4e4e52c	7611	5507	1227	3189	2546	0	0	0	56	20136	17427	767	337	3552	3724	83	0	47	0	25937	7103	543	111	3624	2091	23	21	45	52	13613	1467	497	616	1155	183	0	27	127	4072	3227	2589	162	1502	3401	0	0	182	26	11089
ffecd0109ba29bdb8de8d9deda73b950	619	1847	6308	351	188	2242	227	754	3130	15666	7573	302	566	343	2439	137	176	3702	0	15238	554	188	5473	540	1453	5514	146	857	4022	18747	12842	6390	1033	2181	1828	798	881	5773	31726	218	46	386	66	55	0	0	51	6	828
2e476de4b1e8d6aee8a8fda2629243f8	2839	655	42	5494	523	196	11473	2108	363	23693	4604	55	117	1072	1122	49	1060	1775	0	9854	384	102	137	3714	2092	306	3059	3502	454	13750	293	410	4956	1133	453	12723	3024	1438	24430	149	107	121	3306	318	68	1996	1059	0	7124
a5221bca47972e1b596a14ccf2ec5483	58	731	830	146	3266	291	288	11687	786	18083	571	16	45	155	140	38	55	874	0	1894	293	21	4699	109	262	225	327	0	4569	10505	0	3930	90	0	353	842	31	8051	13297	20	0	171	21	8	0	0	8	1604	1832
c55d543cf08a2bc69c18761a02d5c75f	2826	2585	1533	6430	3897	993	5597	1368	1187	26416	3069	68	961	3171	6832	2008	723	885	0	17717	2147	197	2359	3347	3650	592	1514	2981	558	17345	1148	1424	2751	3766	1779	1051	1059	651	13629	217	234	325	816	582	184	620	298	58	3334
1c0144882347cb3c002dbd2f98a87e2a	431	410	795	357	70	463	49	29	193	2797	657	0	1488	130	134	398	31	76	0	2914	805	284	3577	1696	1680	566	392	2083	159	11242	3516	1704	619	2234	590	1949	1071	521	12204	705	6396	4707	377	333	577	224	179	50	13548
a6fddfc375441ae3cc03f8e4f8ef8ba6	2463	3005	3404	1154	953	216	927	106	41	12269	2820	108	1568	108	476	1814	196	97	2	7189	738	921	212	634	2155	419	342	696	598	6715	1459	1300	2798	1438	568	428	8093	100	16184	0	34	122	165	36	137	42	44	26	606
b453d80e67b66ef91901f908b7ca5e6b	995	2556	320	3752	4923	131	582	304	587	14150	5237	162	93	3503	3613	285	165	1080	0	14138	712	444	482	2215	5276	186	509	3246	80	13150	1444	82	1547	3721	237	905	1590	520	10046	1073	371	58	1137	1698	80	245	623	0	5285
bcba0f85e14c5a435fd6e14ec09e44a8	557	309	303	5591	147	2568	2884	172	258	12789	289	0	263	608	77	228	297	162	7	1931	338	607	608	811	1050	2173	575	1185	3267	10614	1429	12418	706	483	642	2458	507	1128	19771	283	1051	914	141	107	627	244	85	220	3672
e3808cc1cc5a00a9509e4a4fe1f39c54	103	1630	122	823	171	101	307	544	2116	5917	133	0	341	182	305	554	102	519	24	2160	149	189	1616	167	2032	1671	322	252	3541	9939	1128	1074	246	2044	3586	662	113	4147	13000	197	15	23	376	55	194	159	303	2925	4247
a125f7ea946b06bfc357d31575999b71	1722	4326	5797	1167	2474	281	61	54	477	16359	3501	233	361	2926	4723	30	403	705	0	12882	2013	165	3873	2049	2267	813	42	2298	502	14022	5375	2919	663	762	101	606	183	370	10979	1012	547	362	0	111	2265	0	0	25	4322
adc7d5e1d5a90e9011a5b7d0266b180a	1436	1300	822	3245	1965	535	2820	712	569	13404	1530	36	509	1483	3828	1218	407	506	19	9536	1124	107	1313	1760	1772	328	706	1583	306	8999	577	691	1303	1797	793	593	504	314	6572	230	259	321	818	635	186	578	288	61	3376
e8d28f0383e8d0603da463d505097ffb	1456	339	0	2662	270	90	5791	1037	172	11817	2123	27	40	509	649	21	525	895	0	4789	198	45	77	1900	1085	154	1644	1685	251	7039	151	216	2297	521	188	6069	1395	625	11462	146	123	145	3263	296	74	1951	1049	0	7047
9289020ddf7e125bb11350fbdc0f15b1	1182	1448	1959	545	477	96	459	53	27	6246	1370	51	753	51	277	1031	100	55	0	3688	359	439	95	347	1047	190	149	387	301	3314	687	715	1334	732	264	196	3872	42	7842	22	29	111	130	41	130	63	53	29	608
925c77c4658dbe591fc2b4acb029a57d	310	975	3147	208	94	1109	125	384	1567	7919	3933	155	305	207	1334	75	73	2025	0	8107	275	85	3120	287	738	2890	76	462	2177	10110	6426	3312	551	999	841	414	430	2700	15673	202	60	393	51	59	30	0	49	0	844
ca941d1873960b8daefaf47bb8a1494e	1203	2053	337	3988	5147	130	532	348	636	14374	5498	176	132	3639	3126	309	151	1268	0	14299	991	340	334	2147	5241	199	499	3038	94	12883	1255	54	1757	3341	241	1125	1626	577	9976	422	135	36	559	710	27	81	255	0	2225
30b3f4a5cb4b99911df3c977a43d5f6a	51	1025	80	518	109	75	198	439	1628	4123	93	16	235	132	224	408	77	369	0	1554	97	145	1160	96	1281	1147	235	121	2626	6908	717	730	190	1323	2433	436	81	2842	8752	168	11	22	350	63	215	152	350	3209	4540
5583c15c78bda56ab8139c20222192f4	35	416	455	84	1658	150	151	5818	372	9139	247	0	0	73	86	0	0	476	0	882	129	0	2492	66	150	115	160	0	2324	5436	6	2044	45	0	206	460	0	3621	6382	0	0	151	0	0	24	5	0	1731	1911
39af99b891680de6838939af2ffcd55e	3538	318	684	996	1679	294	160	49	145	7863	677	32	1217	159	263	241	180	31	7	2807	2741	749	354	916	2423	377	634	1812	291	10297	2428	2124	1926	5616	1531	880	1090	893	16488	325	1639	1702	289	200	298	237	125	79	4894
d5c1053e5e8bea3375265d00ec436196	298	159	153	2815	79	1378	1639	106	120	6747	149	0	150	324	50	147	148	83	0	1051	182	277	357	408	564	1161	303	598	1756	5606	743	6672	353	244	319	1253	226	545	10355	258	1008	984	114	120	642	217	99	241	3683
54e4ba32e458d4dcd16b737096ee07e2	0	0	522	0	0	47	16	928	179	1692	0	0	27	47	0	33	164	353	0	624	0	0	1401	10	912	210	31	509	220	3293	807	650	0	1206	208	44	3366	323	6604	0	0	206	0	0	31	0	0	53	290
f86c0f123c46f5b3e8b9c45cc36ab043	916	2269	2957	595	1305	129	50	0	259	8480	1661	123	205	1425	2601	23	215	391	0	6644	982	59	2165	1002	1126	448	0	1114	293	7189	2705	1543	307	358	33	297	78	150	5471	1108	623	348	33	90	2396	0	23	34	4655
bd7882adbcf3a71773de47c3882188ac	0	0	254	11	0	0	0	476	80	821	0	0	0	20	8	17	80	149	0	274	0	0	730	0	431	121	0	268	156	1706	395	321	0	514	96	0	1473	128	2927	0	0	211	0	0	25	0	15	51	302
5bf3cf11961d64be4ac309350ba86aa9	581	985	184	1811	2420	54	267	181	287	6770	2555	79	47	1676	1555	158	87	553	0	6710	446	148	205	1001	2467	106	225	1493	45	6136	650	38	793	1539	105	510	704	279	4618	471	145	34	566	711	32	103	287	0	2349
adae552db52c6353e707a87f1c180ceb	1655	120	887	1171	839	358	204	135	186	5555	81	10	628	135	144	525	176	77	0	1776	934	223	566	1217	2159	658	457	1490	363	8067	1836	3273	578	378	638	902	214	477	8296	60	4288	1347	95	108	137	49	50	38	6172
3a7a36025876294dce5bc683ef8f3377	1708	186	375	517	929	148	78	22	78	4041	297	0	577	82	138	155	82	16	0	1347	1394	343	173	480	1142	184	316	902	159	5093	1185	1079	983	2520	648	470	494	424	7803	375	1674	1644	297	158	266	241	101	81	4837
101640dc48dcc94e7430d22db2c5233e	84	847	2143	110	48	1131	112	356	1496	6327	1050	61	272	144	777	113	73	1572	0	4062	156	56	1238	214	410	1907	118	320	2049	6468	4019	2691	304	448	811	260	338	2811	11682	37	28	184	0	24	39	13	18	0	343
1ced4bf1837923d1352bc47fb6556441	787	426	2664	553	49	715	708	88	526	6516	502	17	782	269	422	349	118	558	0	3017	298	65	1154	605	137	295	173	293	167	3187	247	736	174	399	1580	336	74	905	4451	70	196	302	107	73	87	84	128	40	1087
cec7192f79912059e7d156e5c2dbafc2	3479	335	69	767	37	14	737	60	31	5529	1888	0	33	194	165	0	153	87	0	2520	305	45	7	248	765	21	162	85	40	1678	1322	44	187	192	71	549	68	17	2450	352	56	0	28	27	0	25	0	0	488
b815b0dbfaa6629640f514dcd5e9d87d	143	45	141	584	200	902	1426	129	76	3646	268	0	255	107	52	580	688	521	0	2471	306	241	237	398	744	279	690	2578	272	5745	317	1724	316	282	229	4096	1294	302	8560	19	403	601	188	155	572	284	461	144	2827
6c735f0d2bcdd83b5887da644af4111f	433	85	35	99	60	49	54	29	47	891	36	0	162	165	67	250	7	207	6	900	93	819	22	63	2960	42	387	410	126	4922	1055	0	495	836	39	243	192	494	3354	27	65	141	0	21	335	442	463	119	1613
41534695618c037b0be9baf57c52f24b	1323	552	2183	471	70	606	697	42	483	6427	329	0	603	268	369	345	69	474	0	2457	403	90	1851	271	161	239	133	105	95	3348	113	589	372	229	1449	177	35	816	3780	102	203	244	210	66	90	77	75	26	1093
08f5ebef98c1e281ab29d6a5b5cd0d4e	816	81	539	645	435	190	110	54	93	2963	52	0	270	67	54	329	83	47	9	911	470	119	348	667	1077	370	217	791	170	4229	938	1824	285	184	300	488	107	208	4334	55	4338	1366	82	126	136	54	41	35	6233
adbac1599fff58a0c3b18d2c1c1a9758	1673	183	0	338	0	0	343	19	0	2556	928	0	0	105	85	0	79	43	0	1240	143	0	0	88	344	0	85	55	0	715	685	28	88	102	18	260	51	0	1232	302	60	21	23	0	18	19	19	0	462
e92f8c26d3532e0b7c58226556b39295	402	218	1281	254	31	347	338	44	268	3183	257	0	395	133	218	204	88	252	0	1547	160	34	581	288	77	131	84	158	83	1596	117	403	86	167	718	201	31	375	2098	74	185	320	111	81	111	82	131	45	1140
265193c26cef29e3684a219b367d1a7e	183	31	29	42	27	20	31	0	31	394	24	4	89	109	26	161	0	101	0	514	46	354	17	46	1392	24	192	196	81	2348	554	4	213	390	0	134	92	217	1604	0	53	158	28	19	285	416	515	134	1608
448729f4ddfb5f38d15423c3d7ceeeb1	66	0	232	0	62	286	0	0	97	743	107	0	315	37	70	89	31	22	0	671	169	457	504	104	1806	511	83	398	883	4915	2766	282	345	1051	801	343	234	222	6044	146	297	69	42	57	49	59	48	60	827
731e87b9f5b1c190106852520b44be16	714	332	1078	221	37	336	388	18	238	3362	151	0	279	128	185	220	41	256	0	1260	188	38	998	125	83	113	83	55	50	1733	94	305	158	137	672	88	0	362	1816	86	196	228	187	76	119	92	64	28	1076
fcbc0ecc2706150ae6a536df0fe7543a	82	22	72	257	97	467	730	69	51	1847	155	0	114	40	35	344	369	268	10	1335	168	109	127	244	385	140	369	1342	125	3009	163	956	179	145	109	2163	631	156	4502	25	433	568	210	151	600	263	450	174	2874
a6983429e6ce3e12346908b360e2b059	38	440	1101	61	27	591	64	198	771	3291	545	27	120	79	465	64	46	793	0	2139	87	30	718	83	223	1047	51	141	1115	3495	2002	1469	172	185	371	125	148	1318	5790	35	30	226	20	0	31	0	0	0	342
22bcb7803f32752e0af8878452df597e	29	0	117	0	24	155	0	0	65	390	58	0	179	14	37	58	0	0	0	346	76	212	273	60	960	256	0	201	479	2517	1441	149	151	513	376	177	118	109	3034	153	341	72	43	52	41	49	45	52	848
b59e99f0f0a3b274b0448914c8658b74	119	391	196	857	336	104	449	67	120	2639	470	0	241	452	1233	364	91	146	0	2997	469	87	159	669	763	178	147	152	105	2729	215	262	357	442	186	103	91	105	1761	32	122	97	99	116	34	64	45	38	647
c955359fa564acaf148fcd56a50d16cc	428	37	116	142	339	71	0	9	32	1174	135	11	252	0	14	49	0	0	0	461	550	192	506	156	430	220	25	122	72	2273	375	26	32	193	47	0	0	22	695	19	85	28	0	24	0	0	0	0	156
b3069dcc554265fa513104d2d917aa30	0	0	0	45	18	292	3805	101	430	4691	3	0	0	0	4	102	224	101	0	434	0	0	0	0	90	44	1225	895	61	2315	0	0	109	36	259	1707	2025	851	4987	0	0	0	33	0	8	90	56	0	187
6413db727c667a093ef231ac3cb09479	387	74	54	282	143	51	101	12	51	1155	0	0	228	107	127	26	28	62	0	578	284	229	264	235	1013	508	99	470	635	3737	341	419	346	390	725	209	160	247	2837	44	331	1226	69	27	139	43	41	29	1949
3cd2257cb2a60c07283cc1c3516a0367	201	0	49	78	154	46	0	0	0	528	69	0	111	0	0	30	0	0	0	210	242	81	254	78	211	127	0	54	38	1085	217	0	0	89	32	0	0	0	338	17	100	29	0	0	20	0	0	0	166
faf4d610a7da531656b5509b1fcbd554	21	0	18	0	0	37	0	40	0	116	25	0	611	0	0	166	17	30	0	849	115	22	37	382	611	51	360	784	64	2426	63	17	27	47	19	0	0	0	173	0	190	203	245	114	57	389	55	8	1261
3cb7cb0ce5e9e146613add94707370ca	603	489	226	176	101	23	273	106	0	1997	735	20	179	80	101	90	51	55	0	1311	324	62	207	77	1055	76	146	1364	38	3349	49	0	1837	167	212	241	775	52	3333	99	0	0	39	0	0	11	13	0	162
65f303a70a60e57bd6b51881f2d4b794	14	0	10	0	0	29	0	36	0	89	23	0	412	0	0	112	22	20	0	589	55	19	23	253	409	29	236	581	36	1641	46	0	13	25	14	0	0	0	98	13	198	235	312	114	65	445	41	16	1439
d5b321d10fb465a0f66f0948b507c7c0	72	235	108	390	186	70	211	37	67	1376	244	40	92	210	645	213	43	92	0	1579	195	34	77	359	390	68	52	67	45	1287	114	134	192	213	82	52	47	55	889	40	95	81	87	112	0	51	52	0	518
fbcb2b050da82386feefa4711eb10d25	600	398	64	454	384	17	98	203	37	2255	491	53	33	497	1064	0	66	133	0	2337	217	625	50	518	380	0	68	164	0	2022	573	0	0	290	72	161	50	67	1213	60	114	0	37	111	0	30	35	0	387
8b74d2e532afbdc56e891a9266da4925	297	254	152	145	254	0	35	6	0	1143	625	45	101	177	335	28	16	26	0	1353	266	84	325	358	507	0	19	676	0	2235	903	197	174	783	63	18	42	0	2180	152	187	72	81	137	0	0	17	0	646
c14bdcdee27b7575be8970cb688ea129	220	51	25	155	69	21	56	0	40	637	0	0	133	60	53	32	0	14	0	292	155	86	146	123	489	263	56	245	338	1901	155	197	183	191	375	107	80	110	1398	42	366	1330	62	37	122	31	40	0	2030
a5ef7d31c74cc585a9fe2a2f6abe0412	33	168	28	201	54	30	764	435	31	1744	249	0	1156	70	89	214	17	83	0	1878	54	0	0	58	298	23	0	15	30	478	186	0	41	229	39	213	19	0	727	179	0	0	48	61	0	0	46	15	349
891402c33fe52514ffa49d8ca6918fdc	345	289	116	98	62	16	144	60	0	1130	373	0	122	49	62	67	35	51	0	759	191	54	120	43	611	35	83	864	36	2037	26	0	1044	90	143	172	397	32	1904	81	0	0	28	10	0	0	11	0	130
94ac53b0faf4db2267bcc0847a3158d6	723	327	234	613	425	0	193	25	21	2561	469	31	78	553	770	53	67	92	0	2113	261	47	38	432	406	0	59	396	0	1639	245	29	230	570	156	67	111	44	1452	92	107	0	230	138	0	0	0	0	567
0f939b34b6d6700b60c2ee4c137153b1	250	102	94	122	202	11	0	0	19	800	132	0	311	22	41	36	0	0	0	542	199	306	115	69	357	0	22	179	0	1247	2051	33	240	1307	36	34	50	34	3785	123	309	88	41	21	0	20	0	0	602
ebe6b58b4cc138d741488bc2d5719da6	0	85	17	119	35	23	488	281	0	1048	159	11	817	62	76	182	17	68	0	1392	44	0	21	36	196	0	18	13	17	345	134	0	19	156	0	142	16	0	467	173	36	0	51	60	0	33	41	0	394
eda058a0fd7839a36319990046b9d7bd	0	0	12	27	0	147	1853	59	223	2321	0	0	0	0	0	54	111	50	0	215	0	0	0	0	51	0	577	483	34	1145	0	0	47	0	121	809	992	408	2377	0	0	0	0	0	0	107	67	0	174
e88f669fd756af4745b9ed415ff13f63	46	42	151	217	0	91	0	0	184	731	0	0	175	66	38	0	0	21	0	300	36	10	630	0	112	155	0	0	93	1036	63	179	0	75	764	599	0	87	1767	0	32	56	0	0	47	0	26	0	161
cf8e75c97b5576f0b084f19dfdcfaaaf	269	217	21	253	164	0	42	108	22	1096	232	0	0	262	600	0	0	74	0	1168	129	272	37	205	206	0	35	75	0	959	299	0	0	121	26	75	24	39	584	47	120	0	22	109	0	0	42	0	340
11db858e4ffbbce26e745b012e80309c	138	163	76	58	137	0	0	0	0	572	299	26	58	87	198	0	0	0	0	668	126	39	167	143	291	0	0	354	0	1120	426	102	92	342	0	11	17	0	990	156	183	76	79	154	0	19	0	0	667
6b7ebe91d9ed068221f68cfd109b3a79	62	79	53	197	61	144	705	129	53	1483	0	10	88	51	138	255	112	318	0	972	65	31	29	241	220	203	305	195	97	1386	53	146	139	93	119	303	549	75	1477	4	0	25	0	0	0	61	44	0	134
7d540eada9f85c8ecbca5c0c4400b4ab	0	47	271	34	9	63	0	0	130	554	0	0	227	24	13	65	0	6	0	335	45	46	470	0	111	140	0	0	78	890	773	661	0	406	559	0	5	38	2442	0	0	79	0	0	60	0	0	0	139
f30d49432760712ee187e5d0826ffa94	0	0	10	255	0	730	43	0	200	1238	0	0	0	76	11	75	0	0	5	167	17	0	0	0	52	246	41	0	3000	3356	0	73	0	0	1104	9	0	674	1860	0	0	21	0	0	54	0	0	150	225
76ee249ef9fb0e13adaf2e507e610f8d	49	162	222	116	37	108	301	66	68	1129	0	3	203	60	58	294	21	33	3	675	80	29	69	168	240	151	101	213	268	1319	0	153	0	235	173	122	124	140	947	0	62	80	0	0	72	34	9	53	310
3afd7ffed25c4a14062122b20fe6e0da	136	330	53	296	169	0	64	913	57	2018	248	14	13	170	381	37	46	47	0	956	167	80	18	98	90	48	122	153	37	813	378	37	0	168	7	52	27	71	740	75	27	0	42	0	0	0	21	0	165
1af09838511a264f8960906701260360	0	99	51	0	45	0	0	0	75	270	135	0	163	0	40	101	0	46	0	485	178	0	141	49	231	79	62	138	92	970	304	108	0	167	151	0	58	116	904	92	197	94	0	35	107	55	74	0	654
1c65d3399ab8de1c968cae25fcb9bd19	360	0	40	301	188	0	37	9	32	967	110	0	106	20	27	29	0	28	0	320	673	120	49	190	164	32	29	73	0	1330	227	38	74	389	74	27	105	24	958	78	123	110	75	47	34	38	16	0	521
c9d83c7905bdba696b3c0fb08528a5d9	103	54	45	41	89	0	0	0	0	332	44	0	139	16	19	18	0	0	0	236	92	140	63	45	158	0	0	117	0	615	1026	15	95	615	0	0	24	0	1775	122	328	93	42	22	31	0	0	0	638
579be4f0b5307459698e72422aff5032	103	0	48	47	0	54	0	15	37	304	34	0	189	19	43	101	15	0	0	401	85	99	66	51	116	36	39	348	25	865	542	43	201	895	0	147	45	46	1919	22	69	65	0	13	0	0	0	0	169
864fa5582b24fcf889e4dd7b8d76806f	0	29	211	48	0	144	0	33	601	1066	0	3	599	28	0	390	0	0	0	1020	58	49	159	28	87	638	40	81	464	1604	359	516	36	186	936	57	0	891	2981	80	55	138	35	0	224	0	16	23	571
073c9b5629b6fcf4230c5a4b83e59a3f	346	195	116	311	232	0	71	0	0	1271	196	0	30	221	401	33	35	36	0	952	109	0	24	191	196	0	25	209	0	754	120	0	119	302	73	29	61	0	704	80	94	0	206	115	0	24	16	0	535
f8ee208b9e0fac5e3cbe9ef26a34ff09	0	0	0	1501	0	0	332	2911	0	4744	0	0	0	10	0	0	70	0	0	80	36	0	0	0	0	0	132	294	51	513	49	0	31	31	0	93	0	0	204	76	0	0	32	0	0	0	0	0	108
60a360b874e0b78892cd2acf24aa4c77	36	32	109	43	139	27	27	14	30	457	134	21	35	378	1220	82	65	416	0	2351	286	9	66	258	513	0	43	155	33	1363	151	75	326	78	44	140	157	36	1007	41	74	8	60	94	0	0	0	0	277
14bf25d3dafce329fa97a833cafad4b4	0	22	66	88	0	37	0	0	84	297	0	0	71	0	0	0	0	0	0	71	26	11	352	0	52	77	0	0	54	572	28	85	0	23	324	327	0	44	831	0	33	42	0	0	67	0	0	0	142
8e218a901256a247aac33e055b3450e4	0	64	0	0	0	0	0	0	59	123	0	0	117	71	43	74	0	34	0	339	108	0	103	0	144	0	48	89	57	549	214	58	0	135	119	0	0	0	526	136	213	160	0	0	110	51	0	0	670
cf312f0c6e35b386015668cdb8cc75b8	0	87	0	0	0	0	0	0	0	87	151	0	132	0	0	0	0	39	0	322	124	0	139	0	182	90	0	127	72	734	235	0	0	147	118	0	0	105	605	107	182	110	0	26	84	0	59	0	568
897c1e4e5dd1b8f5db165bdf805a647d	260	63	180	72	61	44	43	37	100	860	1057	0	122	47	58	170	75	30	0	1559	201	0	180	180	13	72	19	0	73	738	0	48	40	0	20	156	0	36	300	34	0	66	40	17	0	0	0	0	157
9a5c1a82ee3d50a75c36e7827ef38a6c	33	64	60	30	0	31	39	14	19	290	0	8	0	31	14	0	42	34	0	129	35	0	476	0	6	44	22	0	43	626	0	344	40	0	30	23	0	29	466	0	0	66	0	0	0	0	11	14	91
de419b090f6743874330204d51a01966	0	51	232	32	12	647	44	28	480	1526	0	0	71	0	0	327	13	29	23	463	56	36	40	74	68	627	21	113	1410	2445	187	93	90	51	212	65	39	264	1001	39	9	12	24	12	65	0	19	38	218
5407c9b6549e4dbe2a46f739c0c70b24	0	53	0	0	0	0	0	0	0	53	84	0	110	0	0	0	0	26	0	220	114	0	80	0	103	48	0	86	63	494	174	0	0	83	92	0	0	74	423	109	220	141	0	39	104	0	58	0	671
04b51c7764e47d89d1a0849b65ef33ec	24	41	28	16	0	17	13	0	0	139	10	0	0	0	0	6	46	0	0	62	0	0	349	25	0	40	0	0	25	439	0	232	0	0	34	0	0	0	266	17	0	47	0	0	0	14	0	0	78
8e2b183556c1d5f21149cae088cccf7b	39	0	28	95	32	79	33	28	167	501	0	0	0	17	44	0	0	0	4	65	93	112	0	48	54	301	349	71	149	1177	216	0	44	335	102	155	0	339	1191	11	38	0	0	25	113	38	34	109	368
c6244eb19caf1d85c809162985345ef8	0	0	0	0	0	0	0	0	0	0	160	0	0	0	0	90	0	0	0	250	0	0	0	0	0	0	0	0	0	0	240	0	0	152	0	0	0	0	392	0	316	210	0	0	217	83	0	0	826
459b0726a5a59912cb2fa70149577671	0	0	151	0	0	18	0	0	67	236	0	0	100	0	0	42	0	0	0	142	0	23	290	10	61	75	10	0	55	524	358	344	0	169	260	24	0	0	1155	0	8	81	0	0	54	0	0	19	162
816a4d462ad97331d45e83b51e1a94c5	0	0	0	0	0	0	0	45	81	126	0	0	230	0	0	0	0	0	0	230	0	0	188	59	0	0	0	0	0	247	320	0	0	0	0	49	0	0	369	155	321	188	0	0	187	0	0	0	851
e38be0a5c6675644a04f72eea1e88086	0	87	119	183	156	0	39	0	14	598	54	0	89	28	0	0	46	0	0	217	143	69	0	221	201	0	76	123	0	833	297	56	139	317	70	33	48	16	976	52	79	117	137	32	0	0	18	0	435
f6a21dca1c5401d3ff09137ebcb65341	62	69	17	280	73	13	144	1137	82	1877	139	4	22	68	108	35	117	31	0	524	67	40	34	61	388	78	198	204	180	1250	113	74	0	105	246	198	46	164	946	29	19	0	0	21	13	0	29	37	148
91589b8c5ba3f411ac4b4cce0fe8d361	195	0	20	184	105	0	0	0	0	504	61	0	41	0	10	0	0	17	0	129	381	78	35	105	78	0	21	28	0	726	124	32	33	188	31	23	59	0	490	77	124	94	97	0	0	22	27	0	441
d7302b8b2a3b53270f9c4200fbfec011	21	0	0	1038	0	0	244	2111	24	3438	0	0	0	0	0	0	36	4	0	40	21	0	0	0	46	0	61	165	28	321	24	0	0	0	0	71	0	0	95	52	0	0	0	0	0	31	0	0	83
ffc1985bd148fe6ef1d6ceb6d017294e	171	61	44	164	37	36	227	84	37	861	0	5	100	50	81	174	44	80	0	534	141	51	54	155	263	161	87	250	148	1310	0	50	45	166	58	68	167	128	682	0	46	0	58	0	0	0	0	57	161
784f644042d4d78ace6291c924d3a278	30	61	38	96	37	66	344	68	34	774	0	0	56	26	58	147	68	146	0	501	30	0	0	119	102	101	156	114	54	676	0	89	93	53	48	152	265	46	746	0	28	39	45	12	19	75	49	15	282
a08e270a420633e1f53d3f7ef07ba06f	43	0	0	22	0	39	0	15	0	119	0	0	94	20	23	56	0	0	0	193	60	46	37	30	51	14	19	168	0	425	304	24	95	445	0	73	0	0	941	27	57	88	0	0	4	10	16	0	202
a581a0e2bf9cac15a631ab867da34fd0	27	80	85	52	0	57	151	25	41	518	0	0	68	31	33	155	0	0	0	287	0	0	34	91	111	85	56	97	163	637	0	75	0	96	75	69	57	60	432	0	71	91	9	27	59	32	0	50	339
940b2d73e7431ad97e2c06066538827c	48	0	0	38	51	0	0	0	0	137	0	0	132	0	0	59	0	0	0	191	0	22	0	26	84	184	21	14	118	469	428	108	0	174	179	37	59	177	1162	34	225	437	17	36	28	0	7	84	868
74ec67d6535ea9e90ae67ed6f3139266	0	14	0	0	0	14	18	14	0	60	1	0	169	21	7	24	0	25	0	247	59	0	9	83	144	0	110	116	18	539	14	0	9	11	0	24	0	0	58	0	87	85	46	38	29	131	12	0	428
0b3bd03044f415d42e23c60fd32382a5	63	192	0	161	84	0	37	483	0	1020	141	0	0	117	221	0	0	33	0	512	82	29	0	58	0	0	56	82	25	332	188	0	0	104	0	0	0	39	331	83	30	12	0	31	0	0	0	0	156
315d5756b8b6832b470809e9717488f8	86	69	0	0	41	33	45	58	40	372	180	0	54	12	0	0	0	0	0	246	38	908	3	0	206	72	28	82	33	1370	216	111	0	76	38	61	72	14	588	110	47	33	0	31	24	0	24	9	278
89303f03b4431c7678477175e7f3600f	35	0	50	83	66	20	0	0	12	266	88	0	232	0	19	19	28	0	0	386	84	209	25	113	151	13	22	47	8	672	715	61	23	180	41	11	29	15	1075	0	33	55	7	31	33	13	0	0	172
9b4d60b04216cee36b8c4980272bceaa	0	0	0	0	0	0	0	0	0	0	91	0	0	0	0	73	0	0	0	164	85	0	80	0	0	51	0	90	0	306	191	52	0	0	0	0	0	0	243	131	237	110	0	35	0	53	49	50	665
c962fc591b3cc126dae7f35c1135a2fc	0	0	0	0	0	0	0	0	0	0	0	0	0	0	0	0	0	0	0	0	0	0	0	0	0	0	0	0	0	0	0	0	0	0	0	0	0	0	0	0	0	0	0	0	0	0	0	0	0
45f4e5cb01caa80a1085bbb56f2e550e	0	0	0	0	0	0	0	0	0	0	0	0	0	0	0	0	0	0	0	0	0	0	0	0	0	0	0	0	0	0	0	0	0	0	0	0	0	0	0	0	0	0	0	0	0	0	0	0	0
59eeb6641d21e3a2fc80a1fed947a10c	0	54	0	0	0	0	0	0	55	109	82	0	105	72	29	68	0	28	0	384	113	0	88	0	84	48	31	71	49	484	182	0	0	98	0	0	35	0	315	82	142	103	38	37	96	0	42	0	540
998a18a48401d845debe753d9573ca89	0	104	0	577	35	245	205	56	29	1251	0	4	30	89	38	42	14	28	0	245	54	51	0	30	0	227	0	101	285	748	46	249	0	100	90	95	92	65	737	53	19	55	0	0	22	0	16	27	192
5823ccecb2bd6bb20c50aeb1b6d61a62	63	0	62	79	53	66	307	204	28	862	0	0	88	37	86	96	65	110	0	482	57	0	58	83	30	43	162	409	46	888	39	20	280	112	167	134	140	22	914	0	0	0	25	0	0	36	25	23	109
22bbf0623d68b90811c4916646aea042	0	63	0	0	37	0	0	32	36	168	99	0	106	69	0	56	0	0	0	330	91	0	119	33	127	57	31	106	60	624	193	56	0	135	104	30	0	79	597	63	139	77	0	0	74	0	0	37	390
72dec4c28f80db8271c549f2bbc9fb19	324	54	54	161	73	24	0	0	0	690	154	5	58	0	0	26	0	0	0	243	183	18	38	78	17	0	36	182	0	552	98	111	286	78	0	31	48	15	667	29	22	39	23	18	0	0	5	0	136
7fadc3c5f37ba0f80499db8ab8cedcab	0	0	0	0	0	0	34	0	0	34	0	0	0	0	0	90	0	0	0	90	0	0	130	0	0	0	0	0	0	130	249	0	0	137	0	0	0	0	386	108	213	129	0	42	127	47	0	0	666
dd782f774f66384ca26251766057320b	0	0	55	31	71	0	0	0	0	157	58	0	0	203	644	50	36	230	0	1221	138	0	48	132	242	0	31	67	0	658	76	33	131	35	20	79	69	0	443	42	68	0	52	64	3	21	31	0	281
da2d6af9f4e93be88acda8c6f569ae7d	109	0	34	155	156	109	0	0	0	563	126	0	0	0	0	0	17	56	0	199	123	0	102	73	69	117	34	111	232	861	342	52	225	242	137	183	72	178	1431	86	23	0	45	19	0	0	0	0	173
e3ddab28ff7a13de7b75a4afce95b3db	0	0	105	27	0	68	0	21	276	497	0	0	258	0	0	277	0	0	0	535	35	0	78	0	40	263	24	37	264	741	182	278	0	81	413	30	0	387	1371	63	48	124	26	0	210	0	0	0	471
9ec54040eb6369389c7ff6dc10e9a92e	0	0	0	122	0	308	20	0	107	557	0	0	0	32	0	47	0	0	0	79	0	5	0	0	0	154	0	0	1612	1771	0	31	0	0	532	0	0	274	837	42	0	26	0	0	79	26	13	178	364
3e3b9b8e85f5e1e5286433022db56d2d	35	51	28	0	0	34	28	5	12	193	0	0	0	14	6	18	29	14	0	81	6	0	316	13	0	21	0	0	26	382	0	138	0	0	28	19	0	21	206	0	0	0	0	7	6	0	15	17	45
cbd7bd4b02540bcd9bcb0c50d5340973	377	26	114	144	122	54	45	58	44	984	0	0	87	78	226	27	0	47	0	465	23	0	35	0	71	26	29	107	41	332	74	0	0	216	67	119	60	46	582	23	24	29	0	31	10	0	0	23	140
7ba48c5f8d3b0f8c6a382d4c98c7c6ed	0	50	24	0	22	0	19	22	33	170	94	0	82	66	0	64	0	18	0	324	81	24	83	36	95	46	31	78	47	521	163	63	24	81	76	29	25	51	512	53	98	56	31	14	55	27	27	0	361
43abca28d60f58e3cca49da9120a37af	0	0	0	0	20	0	0	0	0	20	0	0	60	0	0	26	0	0	0	86	0	0	0	0	43	56	0	9	64	172	214	48	0	76	73	0	28	77	516	43	206	415	19	35	39	0	18	76	851
2b0b5903c71f01181652a57d6aec85f9	141	23	89	41	29	0	0	0	55	378	526	0	60	0	34	112	34	0	0	766	87	0	94	109	0	33	0	0	37	360	0	40	24	0	0	85	0	17	166	37	0	71	0	0	0	0	0	0	108
022a8e6c40014c6ad20d9dd746a4363b	0	60	0	0	0	77	0	0	44	181	101	0	189	0	0	0	0	0	0	290	0	0	0	0	917	0	0	0	51	968	0	203	116	16	0	0	334	0	669	0	0	0	0	0	0	0	45	0	45
d1d9c237e3fb3675b42c3565db64113a	18	0	25	48	26	61	20	0	85	283	0	0	16	0	0	0	0	8	0	24	60	51	0	30	37	161	171	40	95	645	109	0	29	191	38	82	0	176	625	0	0	8	0	0	102	41	0	106	257
b46c67fe6469c32d1cc546ff7ffca689	52	0	34	67	0	16	0	0	0	169	0	0	101	14	20	0	0	0	0	135	69	31	63	46	115	23	34	98	17	496	341	101	128	261	54	351	64	33	1333	0	42	60	16	20	27	7	0	0	172
d643209e9f3790f02caf5f93be8afb39	0	0	136	21	0	309	17	17	227	727	0	0	41	0	0	181	0	14	0	236	32	19	18	27	33	331	0	55	670	1185	95	47	46	17	94	44	28	104	475	21	12	0	26	0	58	11	0	35	163
efaa262a6d1c8d8597134dc3db3e341f	0	15	52	97	90	0	0	0	0	254	0	0	29	0	0	0	0	0	0	29	98	44	0	92	105	0	0	59	0	398	135	38	44	160	37	0	23	0	437	56	80	119	132	45	0	38	0	0	470
28c944c3c97e388c55c6e6457adef86f	367	0	26	56	0	0	0	0	31	480	0	9	267	13	62	36	0	0	0	387	82	62	27	49	78	11	0	127	0	436	103	59	64	197	99	52	15	43	632	59	121	78	43	53	16	0	29	0	399
7e2e3a6f9a0594c85f8327819e369d47	121	0	142	77	61	0	0	0	0	401	0	0	32	0	23	32	0	19	0	106	81	60	0	94	182	0	0	0	0	417	724	58	185	238	53	0	26	0	1284	47	76	63	69	22	11	0	0	0	288
d768e50c31ed2314b9278405fd9b472c	35	133	106	18	4	123	32	63	72	586	53	6	0	6	11	0	94	57	0	227	0	81	38	4	76	186	25	44	64	518	372	38	66	151	30	180	72	154	1063	2	0	0	4	7	9	0	0	0	22
da44d6f4082e2fa9d3bbccbcdfec8f29	42	26	0	0	0	0	25	24	20	137	100	0	30	0	0	0	0	0	0	130	22	407	0	0	117	28	0	50	0	624	108	62	0	33	18	46	43	0	310	88	70	33	0	0	22	15	26	0	254
b6617bd1b9050b134c56c951dce609e4	20	40	0	8	14	0	31	0	0	113	0	0	0	0	6	0	24	6	0	36	0	0	227	0	16	0	12	0	0	255	0	89	0	0	0	0	0	0	89	14	0	33	0	0	0	0	0	0	47
755ed8a46fd83cb47a220a78f8d1070b	89	21	0	83	34	25	116	44	0	412	0	0	50	0	37	104	27	48	0	266	81	0	38	73	114	75	42	101	101	625	24	0	22	108	36	41	74	51	356	21	43	42	53	35	9	36	0	58	297
d3646858b550762fd00c5c614b141efe	25	0	0	42	29	0	0	0	10	106	22	0	110	0	0	18	0	0	0	150	45	103	0	55	64	0	8	18	0	293	353	21	16	78	28	0	20	0	516	0	32	38	0	0	19	0	19	0	108
5b77537533757e5c0931ba71534e9bd8	179	47	0	57	88	0	0	0	0	371	0	0	88	0	81	0	0	0	0	169	107	0	93	86	71	57	0	93	0	507	175	91	145	241	0	0	57	0	709	119	122	66	44	35	36	0	0	0	422
50bcbc5fe5c53c765e51ea51a9b06597	0	0	5	36	26	26	33	0	33	159	0	0	30	50	30	34	0	0	0	144	34	47	41	60	80	169	0	58	95	584	219	93	0	86	71	50	89	163	771	21	0	25	0	26	20	0	0	0	92
707881937223dc318933179f5d5b9dda	0	67	0	50	0	11	109	31	38	306	68	0	30	24	22	12	12	15	0	183	0	53	0	28	216	65	55	152	44	613	1005	0	0	274	0	30	6	32	1347	30	0	0	0	0	0	0	0	0	30
f04b0fa396ca8d15c2dda6cfee574070	0	32	17	0	0	0	0	24	0	73	0	0	53	43	23	43	0	0	0	162	58	0	59	0	47	37	17	0	54	272	118	48	0	70	70	26	0	62	394	0	107	67	0	0	51	28	30	30	313
45047ae248f03650bba3db31c94f9c70	0	0	29	77	84	73	14	0	29	306	0	0	18	19	41	0	0	53	0	131	49	9	177	47	70	128	0	149	276	905	214	0	203	210	120	159	104	166	1176	26	0	0	0	23	0	0	0	0	49
b5f25a6334f3cfad647a5fa65255c890	0	0	0	0	0	62	0	0	24	86	123	0	132	16	0	0	0	0	0	271	69	0	0	0	430	0	27	0	36	562	0	328	0	0	10	0	386	0	724	0	0	7	0	0	0	0	0	26	33
09fe4d4f0e2883701c59e4795a09cacf	151	0	25	89	47	0	0	0	0	312	68	0	0	0	7	0	0	0	0	75	88	0	0	37	0	7	0	87	0	219	48	69	121	25	25	0	0	0	288	41	0	0	22	0	19	10	0	0	92
8fb7827ea4fb95cf097e589649d65465	29	24	0	164	37	0	85	557	38	934	77	0	0	23	47	26	71	24	0	268	26	21	19	31	162	48	108	88	102	605	55	37	0	46	117	116	0	82	453	22	0	13	0	0	0	27	0	0	62
9079f3fc8231161d2e248adc932810fc	0	54	0	311	0	117	126	0	0	608	0	0	0	50	23	34	0	17	0	124	31	32	0	0	0	125	0	59	153	400	27	121	0	49	41	34	61	39	372	29	18	66	20	14	0	0	0	23	170
873e0ff36c06f1f85374c273864cdd23	0	55	0	0	0	0	0	0	30	85	0	0	101	57	0	44	0	0	0	202	88	0	87	27	122	54	33	78	41	530	166	59	0	92	80	0	40	66	503	54	89	48	0	0	35	0	22	19	267
92d9bca2d1b8a0268ca975f319188f92	0	0	0	80	0	0	1246	38	0	1364	0	0	0	0	0	0	166	30	0	196	0	18	0	21	0	0	281	0	8	328	0	16	0	0	0	500	176	0	692	0	0	0	0	0	0	95	5	0	100
f67c22c31e28f85555c76450d986ff63	0	0	16	0	0	0	0	0	0	16	0	0	30	0	0	0	0	0	0	30	0	37	1	0	0	0	0	0	0	38	1713	0	0	198	0	0	64	0	1975	110	13	0	0	0	0	0	0	0	123
2efb584279ac3c095b426cc38535cdca	192	0	0	36	0	14	0	0	0	242	0	0	121	0	34	35	0	0	0	190	36	24	18	24	48	0	0	58	0	208	54	35	33	99	37	28	0	0	286	67	147	76	53	59	13	0	28	17	460
e46e81bbb64ce3397f218999b93440c6	34	0	0	33	31	32	162	84	15	391	0	0	43	0	36	74	40	47	0	240	0	0	29	51	24	27	84	219	25	459	19	0	148	35	95	60	42	16	415	0	0	20	26	25	0	29	28	0	128
bc39cc0de87d1579d20a8ecb7d5faed7	30	0	0	0	0	0	0	0	6	36	0	0	46	0	0	0	0	9	0	55	40	24	27	23	50	0	0	39	0	203	170	66	53	116	24	175	24	0	628	34	40	66	16	25	0	0	8	0	189
c14e055a2ec75649c70dcbdfe80bcad1	0	38	29	0	36	12	0	243	8	366	0	0	0	0	0	0	29	35	0	64	20	0	72	0	0	13	0	0	15	120	0	8	0	0	0	0	0	11	19	0	0	25	0	0	0	0	0	31	56
8fbf8b60f27232a4a5e9d359056dec69	0	0	0	0	32	0	0	0	0	32	0	0	115	89	0	0	0	0	0	204	104	0	0	0	113	0	0	0	58	275	178	0	0	103	88	0	0	0	369	0	87	0	0	0	0	0	0	31	118
fffa008870ae668545dad96c4b4079aa	0	34	0	0	0	0	0	0	0	34	62	0	68	0	0	0	0	0	0	130	61	0	66	0	79	0	0	62	42	310	96	48	0	67	66	0	0	57	334	0	119	71	0	0	46	0	0	25	261
1a62d5a173938a845f30b4c2239db5ab	0	30	0	0	0	0	0	0	0	30	52	0	75	10	0	0	0	0	0	137	0	0	0	0	479	0	0	0	37	516	0	119	54	0	0	0	152	0	325	0	0	0	0	0	0	0	0	38	38
8bf0416b80ea1646efe94c935f623917	0	52	0	0	0	0	0	0	0	52	0	0	108	68	0	0	0	0	0	176	95	0	92	0	87	0	0	71	0	345	135	59	0	120	72	0	0	0	386	0	114	72	0	0	60	0	0	0	246
59da37091d382f32ae36be2fbb733ae5	0	24	38	59	75	52	63	49	65	425	0	0	49	48	84	64	22	51	0	318	16	47	44	65	156	58	58	142	53	639	56	0	17	65	155	40	12	62	407	0	0	0	21	0	0	9	0	0	30
3b0c199fc9366f4ee2c4694bdcbc9f96	103	0	0	0	47	0	0	0	0	150	0	0	51	0	0	0	0	0	0	51	71	0	59	43	0	0	0	66	0	239	87	0	60	144	0	0	0	0	291	138	122	96	30	37	0	19	55	0	497
4d73c73c2d1f728068f680eeb28714c6	0	0	0	0	0	0	0	0	0	0	0	0	17	0	0	24	0	19	0	60	0	30	33	30	31	75	0	33	52	284	108	48	0	41	32	37	37	75	378	0	29	22	0	23	20	0	10	0	104
1ef6fccd7a9253a34a842f048252464e	65	0	0	265	10	0	763	50	0	1153	0	0	0	77	14	0	39	0	0	130	0	116	0	34	7	0	198	182	0	537	0	0	0	234	0	86	111	0	431	0	0	0	0	0	0	42	32	0	74
175a28b63bcdbbc2c6296d735ecf354d	0	0	0	0	0	0	0	0	20	20	56	0	55	0	0	42	0	0	0	153	60	0	54	0	85	41	0	47	42	329	97	0	0	64	61	0	0	44	266	37	84	54	0	0	37	0	18	0	230
c622a9ab24cb3acc7dfa508ae63cfabd	55	0	0	88	63	48	0	0	0	254	60	0	0	0	0	0	0	0	0	60	54	25	57	29	0	59	0	50	130	404	194	0	101	113	63	94	37	87	689	73	0	8	42	0	0	0	26	0	149
3d10693376bf2905ca07c83500969489	0	0	0	22	57	39	0	11	22	151	0	0	0	0	0	0	0	0	0	0	17	20	137	62	162	80	35	159	44	716	31	45	0	0	86	67	30	32	291	0	50	43	38	0	62	0	14	0	207
64fed9fc0c7699e88c83d3c542367e9e	48	0	61	39	22	0	0	0	0	170	0	0	12	0	17	19	0	0	0	48	39	21	0	41	87	0	0	0	0	188	368	38	76	106	0	0	0	0	588	38	76	68	51	24	0	0	0	0	257
3cdd1357fd6cb12fcc1068b22556830e	44	85	78	20	14	22	0	16	0	279	72	0	77	0	0	67	22	0	0	238	43	27	42	118	75	0	0	0	27	332	43	64	54	0	26	39	77	0	303	0	0	0	0	0	0	0	4	0	4
98085f690ff4ba39f42ecd13dba3eec4	0	59	0	178	151	0	78	43	13	522	80	19	0	91	164	20	66	78	0	518	44	17	0	79	149	0	21	73	0	383	21	0	56	99	0	31	84	13	304	0	24	0	23	0	0	0	0	0	47
d20d23be1d498636a132e949454e8a01	72	43	29	51	41	0	0	53	33	322	0	0	0	0	0	0	31	37	0	68	0	0	187	0	0	27	36	0	21	271	0	51	0	0	47	42	0	28	168	0	0	0	0	0	0	6	0	67	73
670fe6f7a9a2d54c3751b318dcf14467	180	18	46	81	57	32	24	0	0	438	0	0	38	50	130	22	20	17	0	277	0	21	23	0	0	0	0	62	0	106	40	0	0	88	35	51	17	20	251	16	0	21	0	0	8	12	41	0	98
bc18fdd7cda1a79049b82a0ff32078da	0	0	0	0	19	0	0	120	0	139	0	0	0	0	9	0	0	0	0	9	0	0	29	0	3	0	0	0	0	32	0	0	0	0	0	0	0	0	0	0	0	0	0	0	0	0	0	0	0
dc9f716d344b84953f0214f2b40cad1a	0	72	44	0	0	79	0	41	30	266	36	0	0	0	0	0	59	0	0	95	0	52	23	0	32	78	0	23	37	245	181	0	0	56	0	124	0	55	416	0	0	0	0	0	0	0	0	11	11
300ab9038cd2bc457959a0218db391a7	0	0	0	0	0	35	0	0	0	35	50	0	68	0	0	0	0	0	0	118	36	0	0	0	217	0	0	0	19	272	0	166	0	0	0	0	212	0	378	0	0	0	0	0	0	0	25	0	25
460bdb848f25902fc618b4b5692462b3	0	43	0	128	61	0	0	0	0	232	0	0	0	20	52	0	28	19	0	119	82	0	0	151	73	0	0	78	0	384	46	20	101	84	13	0	35	0	299	59	46	98	100	51	0	26	0	0	380
e80376775580042f213e5bd8b640e475	0	0	0	0	0	0	0	0	19	19	33	0	35	0	0	45	0	0	0	113	27	0	51	0	46	17	0	25	23	189	80	0	0	27	36	0	0	33	176	46	72	61	0	0	57	0	26	0	262
36553982d303df983616f554ac92d888	108	0	72	68	50	0	123	0	0	421	144	0	0	0	32	22	99	125	0	422	88	0	102	93	0	85	55	50	50	523	0	79	98	0	38	89	54	0	358	0	0	0	0	0	0	0	0	0	0
172f842c9c0eaadbc9873aa355ee5413	114	0	61	64	0	48	94	0	0	381	0	0	0	36	0	0	79	36	0	151	64	0	90	74	0	68	48	0	55	399	0	95	59	0	71	67	0	0	292	0	0	0	0	0	0	0	0	0	0
3f0ea2e8605ee222725f4572d483d63b	0	47	0	24	0	0	47	18	0	136	42	0	0	0	0	0	0	0	0	42	0	22	0	0	96	29	0	67	19	233	519	0	0	130	0	26	0	0	675	19	0	0	0	0	8	0	0	0	27
bd01170506554fa8e3bbd3f357f2cdcc	0	22	68	0	0	28	15	0	204	337	0	0	255	0	0	100	0	0	0	355	0	0	89	0	24	164	0	27	149	453	90	149	0	83	257	20	17	342	958	0	24	47	0	0	133	28	0	0	232
1ed2267a44a855553f88199c3f6385d5	240	0	62	34	45	0	59	4	5	449	61	0	0	0	11	70	19	37	0	198	74	26	0	60	65	0	14	0	25	264	0	166	125	51	0	17	82	0	441	0	0	0	0	0	0	0	0	0	0
d382d735e3fa0a0f81a7e8fd3d157067	273	101	53	43	40	9	0	0	13	532	57	0	137	0	11	33	0	0	0	238	80	0	102	0	31	18	0	0	0	231	130	208	0	117	45	59	0	0	559	0	53	42	0	32	0	0	0	0	127
481348807de2fce06d201dde26cee6b2	0	0	0	0	0	0	0	0	0	0	0	0	0	0	0	0	0	0	0	0	0	0	0	0	0	0	0	0	0	0	0	0	0	0	0	0	0	0	0	0	0	0	0	0	0	0	0	0	0
3674777c6651c321451d31a1a9e9040b	0	0	0	0	0	0	0	0	0	0	50	0	0	42	0	0	0	0	0	92	67	0	69	0	69	0	0	0	0	205	100	0	0	73	0	0	0	0	173	0	118	0	0	0	79	0	0	0	197
e7c5b8d08747cf413a771d8835d05bee	0	115	23	234	32	11	46	92	143	696	113	0	0	45	48	0	7	13	0	226	13	260	17	0	0	28	10	0	44	372	80	0	0	135	0	20	0	9	244	282	0	0	0	0	0	0	0	0	282
6b861eaba9a2afe0643dc9c975c89df3	0	37	0	0	0	0	0	0	0	37	37	0	55	35	0	26	0	0	0	153	46	0	42	0	57	27	0	31	38	241	91	0	0	53	50	0	0	37	231	30	58	41	0	0	0	0	0	0	129
4b777b718774087514b9b6df57a29455	0	0	0	0	0	0	0	0	0	0	0	0	183	0	0	65	0	7	0	255	0	3	0	0	5	20	0	0	27	55	37	0	0	0	21	15	0	25	98	21	39	36	0	0	5	7	0	13	121
1d4cb606405fb67c14023e83313691a7	0	67	0	38	0	27	241	64	20	457	0	0	0	0	0	38	96	123	0	257	0	0	0	0	0	0	78	69	0	147	0	0	50	58	52	84	220	0	464	0	0	0	0	0	0	20	17	5	42
70bb47960cb2337a37fd84612cad1031	0	22	0	0	0	0	0	0	0	22	28	0	30	26	0	25	0	0	0	109	37	0	32	0	31	23	0	25	17	165	65	0	0	35	32	0	0	28	160	41	87	54	0	0	0	0	0	0	182
5a1ce69d97faa212ae4090e47fa9243c	0	0	0	0	15	0	0	144	0	159	0	0	0	0	8	0	0	11	0	19	0	0	51	0	0	0	0	0	0	51	4	0	0	0	0	12	0	9	25	0	0	21	0	0	0	0	0	24	45
55ea4e626112d2e43c73cb8bb765286a	0	0	8	15	0	0	0	0	0	23	0	0	39	9	9	0	0	5	0	62	0	25	39	13	0	0	0	0	0	77	540	68	155	283	82	54	14	16	1212	48	25	0	51	17	0	0	11	0	152
6575a7ad07a596db15acca9e5d68f6a7	0	35	0	85	80	31	53	28	0	312	38	0	0	51	98	0	36	52	0	275	0	0	0	51	93	0	0	29	0	173	0	0	27	52	0	21	47	0	147	22	0	0	0	36	0	18	17	0	93
83f3b36de798bbaf42d196b6fdab4a0b	90	35	0	16	0	0	17	12	0	170	0	0	0	0	12	0	12	21	0	45	0	0	0	92	0	0	63	58	0	213	0	0	0	0	0	54	0	0	54	21	0	0	0	0	0	14	0	0	35
40c3c9ded7c5413b8ce407613820e5e0	0	0	0	0	0	0	0	0	0	0	0	0	23	0	0	0	0	0	0	23	0	23	3	0	0	0	0	0	0	26	834	0	0	78	0	0	21	0	933	104	0	0	0	0	0	0	0	0	104
b0bd14ff39685f008e94f8d25e4339b4	0	0	0	16	0	10	15	0	34	75	31	0	0	6	6	0	0	0	0	43	0	0	0	4	0	24	0	0	39	67	979	0	0	0	49	11	40	35	1114	0	0	0	0	0	0	0	0	0	0
3298ee1c778fab3fc585c1c210285504	0	0	0	69	25	0	0	0	0	94	0	0	0	0	0	0	16	0	0	16	47	0	0	92	0	0	0	0	0	139	0	34	47	32	0	0	0	0	113	62	63	93	125	67	5	23	26	0	464
04b72c25473891a7aded8f08cf77e71a	0	0	92	0	0	0	34	0	183	309	0	0	33	0	0	35	0	18	0	86	24	0	0	0	130	94	45	43	93	429	0	123	0	50	164	0	0	137	474	0	0	17	0	0	37	0	0	0	54
5210619111d18cfa03d039d554968240	174	136	0	75	37	28	23	30	0	503	232	0	45	0	0	66	19	0	0	362	92	0	0	10	244	29	0	25	0	400	0	0	400	50	55	59	204	47	815	0	0	0	0	0	0	0	0	0	0
2b50b908cf8ae228c369af058c523482	28	19	59	0	0	0	0	0	27	133	0	0	31	10	7	0	7	0	0	55	46	0	29	32	59	17	0	0	12	195	127	16	0	261	33	0	0	27	464	35	313	22	0	5	0	0	0	0	375
fed8764a16d62e46869a6759e8be5438	0	0	0	58	0	0	785	0	0	843	0	0	0	0	0	0	97	11	0	108	0	0	0	0	0	0	154	0	0	154	15	0	0	0	0	219	166	0	400	0	0	0	0	0	0	48	0	0	48
2a33de8b1694259df95379427e3b3c9a	0	85	0	0	0	0	0	0	0	85	1161	0	0	0	0	0	0	0	0	1161	0	0	0	0	0	0	0	0	0	0	0	0	0	0	0	0	0	0	0	761	33	0	0	0	0	0	0	0	794
6909e8c54c4660d6a80f220822568446	0	0	0	0	0	0	0	0	0	0	0	0	0	0	0	0	0	0	0	0	0	0	0	0	0	0	0	0	0	0	0	0	0	0	0	0	0	13	13	0	0	0	0	0	0	0	0	0	0
3337155254cf60afd83603c2614d10f2	0	0	0	24	0	0	594	0	12	630	0	0	0	0	0	0	72	0	0	72	0	0	0	0	0	0	168	0	0	168	0	0	0	0	0	261	68	0	329	0	0	0	0	0	0	130	0	0	130
c4ee3d11cb95b1a950089bf23a2fa872	0	0	0	53	0	0	604	0	0	657	0	0	0	0	0	0	75	0	0	75	0	0	0	44	0	0	196	0	0	240	31	0	0	0	0	227	167	0	425	0	0	0	0	0	0	48	0	0	48
49ff7fd63620874eb62191d22f6fa8ec	0	0	0	13	13	0	0	0	10	36	0	0	0	0	0	0	0	0	0	0	0	0	47	0	0	47	0	0	17	111	0	0	0	0	0	0	15	14	29	0	0	0	0	0	0	0	0	0	0
ba7e95504a09b006a9ed00690d5fd203	0	0	0	0	0	48	0	0	0	48	152	0	65	0	0	0	0	0	0	217	0	0	0	0	771	0	0	0	0	771	0	52	0	0	0	0	125	0	177	0	0	0	0	0	0	0	0	0	0
da483f46dfb9e919b9ceab13b4ba1fd6	0	0	0	41	47	27	0	0	0	115	0	0	0	0	0	0	0	0	0	0	30	0	96	24	32	63	0	76	145	466	94	0	97	95	56	85	54	66	547	0	22	0	0	31	26	0	0	0	79
a48d609057729ab7350bb4213bccedb9	0	33	0	48	0	0	185	48	0	314	0	0	227	12	18	52	0	15	0	324	0	0	0	0	87	0	0	0	0	87	49	0	0	0	0	32	0	0	81	24	6	0	0	0	0	0	0	0	30
f0f83eb2a5e5f4609537e85a6d57c22a	0	0	0	50	52	0	88	99	26	315	74	0	6	54	88	16	32	92	0	362	41	0	0	78	0	38	0	116	20	293	0	29	107	36	81	46	35	57	391	0	22	10	0	0	33	0	0	0	65
085de3fadb6c6a0086a24318f2bbd31c	95	25	24	0	31	18	0	0	0	193	322	0	62	0	0	0	0	0	0	384	32	0	0	35	134	0	0	159	0	360	0	0	240	28	0	32	156	0	456	0	0	0	0	0	0	0	0	0	0
53130b8b0e5745b5c3c26af111d177db	0	0	0	0	0	0	0	0	4	4	0	0	92	0	6	44	7	0	3	152	0	0	0	0	0	0	0	0	16	16	33	0	0	0	0	0	0	0	33	0	25	33	0	16	0	0	0	0	74
b816f7df785cc20c77e2342b35dd5335	25	43	52	16	0	0	0	0	0	136	46	0	44	0	0	31	0	0	0	121	30	22	0	67	56	0	0	0	0	175	0	51	35	0	0	0	40	0	126	0	0	0	0	0	20	0	0	0	20
f52cd7a70bc514002ffc12ffe35d9873	0	32	0	0	0	0	0	0	15	47	0	0	32	0	0	19	0	0	0	51	39	0	45	0	0	0	22	37	16	159	79	22	0	47	27	0	0	30	205	29	46	0	0	0	28	13	15	8	139
fa11ff98e3b6fc64bbb7f45e708659a9	0	5	0	8	22	0	0	0	0	35	0	0	0	0	25	0	0	0	0	25	29	103	0	18	0	0	0	0	0	150	601	0	77	78	0	0	36	0	792	28	19	19	0	0	0	0	10	0	76
f350d9ea26d070d7c921c4b37cc0bbaa	0	0	0	0	0	0	0	70	0	70	0	0	0	0	0	0	6	0	0	6	0	0	26	0	0	10	7	0	0	43	0	0	0	0	0	0	0	0	0	0	0	0	0	0	0	0	0	0	0
299b1ecdbaaecb8b75e5bc4b01c56cff	0	0	0	0	0	0	0	0	0	0	0	0	0	0	0	0	0	0	0	0	0	0	21	0	0	0	0	0	0	21	0	0	0	0	0	0	0	0	0	0	24	0	0	0	0	0	0	0	24
71364575358f79fde0351a76840f3700	0	0	0	128	52	0	0	0	0	180	232	0	0	0	51	0	160	147	0	590	0	0	0	0	0	146	0	85	0	231	0	0	0	0	0	0	0	0	0	0	0	0	83	55	0	49	0	29	216
d21166b573bc7c8f35a552fda76e05ba	5	0	47	59	67	0	42	36	5	261	0	0	38	76	74	59	0	0	0	247	45	0	54	87	8	10	39	130	0	373	46	58	0	54	22	33	0	23	236	0	0	0	30	0	0	0	0	0	30
df40675bb6709f63ac5f2a4ab63a4047	74	0	0	47	55	14	0	0	0	190	48	0	0	6	26	0	0	0	0	80	74	36	52	0	69	0	18	41	0	290	43	0	46	32	0	0	0	0	121	0	66	34	0	0	5	0	7	0	112
cae670efafaea33ef8acff02d94c150d	0	0	0	18	27	25	0	0	22	92	0	0	23	7	0	12	0	0	0	42	0	0	37	9	28	95	0	66	41	276	45	80	0	42	166	17	86	163	599	0	20	57	0	0	14	0	0	18	109
0dfeca005f640831c71497f971723598	0	0	0	12	39	0	0	0	7	58	0	0	0	0	0	0	0	0	0	0	0	7	0	0	0	10	0	0	100	117	0	0	0	0	0	0	0	4	4	0	0	0	0	0	0	0	0	34	34
75f828a8932d0fc5dc910d8b0ece2884	0	12	0	0	0	0	0	0	8	20	0	0	30	0	0	16	0	0	0	46	27	0	38	0	0	0	7	22	16	110	49	24	0	33	32	0	0	17	155	28	50	0	0	0	25	18	15	15	151
b17e3ade5d990514767087189379d429	0	25	0	33	0	0	118	55	0	231	0	0	159	0	9	45	0	20	0	233	0	0	0	0	58	0	0	0	0	58	31	0	0	0	0	27	0	0	58	29	0	0	0	0	0	0	0	0	29
8f4cde708b52021311e0b6ec9315937d	0	18	0	0	0	0	11	0	18	47	40	0	54	21	23	44	0	0	0	182	31	13	57	0	49	18	14	42	37	261	79	31	12	50	48	15	18	33	286	19	24	17	0	0	14	0	0	0	74
11128261d7b691723295a3132225c631	29	0	0	28	0	0	0	0	0	57	0	0	0	0	0	0	0	0	0	0	0	0	97	0	0	0	0	0	0	97	0	0	0	0	27	0	0	12	39	0	0	32	0	0	11	0	0	55	98
9e1e0f9c6a29fd158d57b251689edbd9	23	0	0	14	44	0	0	0	0	81	0	0	0	0	0	0	0	0	0	0	15	0	83	38	98	0	0	98	27	359	0	27	0	0	44	43	19	26	159	0	35	43	0	0	0	36	0	0	114
e12dfd8d41760e773cb0ffa2d6d87f12	0	0	0	0	0	0	0	0	0	0	0	0	0	0	0	0	0	0	0	0	0	0	0	0	0	0	0	0	0	0	0	0	0	0	0	0	0	0	0	0	0	0	0	0	0	0	0	0	0
2d61272813e8d3277e992f149a5b65a7	0	39	31	0	5	11	59	0	6	151	0	0	31	26	18	0	0	9	0	84	0	18	23	0	0	9	0	0	19	69	29	34	0	0	17	0	0	0	80	0	0	0	0	0	0	0	0	0	0
46ebe06851392bd3bf0af0b8ec22ffdd	41	0	0	140	0	0	382	26	0	589	0	0	0	38	0	0	0	23	0	61	21	49	0	0	0	0	77	103	0	250	0	0	0	108	0	52	65	0	225	0	0	0	0	0	0	49	0	0	49
71143d99cf4a36a2f25a1b7182513070	0	46	0	50	29	0	78	0	0	203	99	0	0	0	0	0	46	55	0	200	47	0	54	0	0	0	0	43	0	144	0	54	59	0	47	58	36	0	254	0	0	0	43	0	28	0	0	0	71
9728b6f3d5b424e19aa419268c49c7f2	52	16	0	0	0	0	0	0	0	68	0	0	0	17	0	0	0	0	0	17	0	0	0	34	0	0	31	0	0	65	0	0	0	0	0	0	0	0	0	0	0	0	15	0	0	0	0	0	15
f87390aa3e976785c8f2544248973de9	0	0	0	0	24	3	0	0	0	27	0	0	0	0	0	0	0	0	0	0	0	0	0	0	0	0	0	0	59	59	0	0	0	0	0	0	0	0	0	0	0	0	0	0	0	0	0	0	0
2627c51d6a68638001d41b3460f94893	226	136	41	70	36	0	0	15	0	524	78	0	23	33	0	33	32	20	0	219	95	56	42	67	88	13	0	0	13	374	0	0	215	100	71	51	0	0	437	0	0	0	0	0	0	0	0	0	0
218f197b9b450c2a8c5672d556fd1a54	0	0	48	81	37	15	26	15	0	222	0	0	16	15	0	0	0	0	0	31	135	28	87	46	49	16	42	0	25	428	40	54	29	93	54	27	37	24	358	12	17	23	18	0	0	0	0	0	70
75a972c971a301ee008d9b996c68d0c7	0	0	0	34	0	0	47	36	28	145	0	0	31	27	52	59	0	0	0	169	0	0	0	0	109	26	27	68	42	272	0	0	0	48	71	0	0	29	148	5	0	0	0	19	0	0	32	0	56
36072a704b850b011ac972e8b24fa48d	0	0	0	40	9	0	0	0	0	49	0	0	0	74	0	0	0	0	0	74	195	0	0	0	0	0	0	0	0	195	143	0	0	0	11	0	33	0	187	0	0	0	0	0	0	1102	0	0	1102
8cfd29888c8c4e785dcf92ec03e81401	0	0	0	0	0	0	0	0	0	0	0	0	0	0	0	0	0	0	0	0	0	0	0	0	0	0	0	0	0	0	0	0	0	0	0	0	0	0	0	0	0	0	0	0	0	0	0	0	0
a7720c7348118039485b1b9d1a6e9e86	0	0	0	260	0	0	59	687	0	1006	0	0	0	0	0	0	0	0	0	0	0	0	0	0	0	0	0	128	20	148	0	0	0	0	0	30	0	0	30	26	0	0	0	0	0	0	0	0	26
550ef7e620b61a9e575ef64fb28083d3	121	0	0	0	25	0	32	0	0	178	30	0	0	8	0	44	0	0	0	82	0	0	0	0	25	0	0	0	0	25	0	71	83	28	0	0	48	0	230	0	8	0	12	6	0	0	0	0	26
1c5f61427a96d56ead2a700d3497f37b	37	121	25	106	0	74	55	17	0	435	0	0	0	0	0	0	32	0	0	32	67	0	151	60	132	21	25	44	0	500	0	0	53	0	46	0	49	0	148	0	0	0	0	0	0	0	0	0	0
b81b292f9ce6c6699b051b2b1c06d63d	122	58	66	89	0	0	88	0	0	423	0	0	0	0	54	0	100	138	0	292	0	0	0	101	0	0	0	0	0	101	0	0	0	0	0	105	44	0	149	0	0	0	0	0	0	0	0	0	0
0bb3eb45c238a5fb359be934a59b6bdd	136	65	0	0	0	0	0	0	0	201	28	0	60	0	0	0	0	0	0	88	30	0	62	24	21	23	0	0	0	160	73	124	0	55	27	0	0	0	279	33	63	35	0	33	38	0	0	0	202
b0529d821cea86531bfe6ac29dc97c22	0	0	0	0	6	0	22	0	0	28	0	0	0	0	0	0	0	0	0	0	0	0	18	0	0	0	0	0	0	18	0	0	0	0	0	0	0	0	0	0	17	24	7	0	0	0	0	5	53
7ef377de3de84b6968502204cfa389c6	0	20	0	0	0	0	9	0	12	41	24	0	18	18	25	40	0	0	0	125	32	6	36	0	39	11	22	35	32	213	46	21	4	29	23	11	13	22	169	16	30	12	0	0	22	0	0	0	80
e3e8f6f40ac4bb228bd44c3d2c5bccba	50	53	34	49	0	0	33	0	0	219	331	0	24	0	0	0	0	0	0	355	62	0	65	0	205	0	0	75	0	407	27	0	176	32	65	0	59	0	359	0	0	0	0	0	0	0	0	0	0
a8fe37d451a9d5ed02dffa074a2eb382	0	56	0	0	0	0	0	0	0	56	601	0	0	0	0	0	0	0	0	601	0	0	0	0	0	0	0	0	0	0	0	0	0	0	0	0	0	0	0	799	38	0	0	0	0	0	0	0	837
a9504d32ecdffeb10c1b927eb2b8c104	0	0	32	61	44	43	0	0	18	198	0	0	63	0	0	48	0	0	0	111	40	0	201	43	112	18	16	82	83	595	48	43	56	0	46	7	24	19	243	0	22	0	0	0	36	0	0	0	58
a7f9f23c389f7de9b7796b0141b3ba98	0	0	0	0	0	0	0	0	0	0	0	0	0	0	0	0	0	0	0	0	0	0	0	0	0	0	0	0	0	0	0	0	0	0	0	0	0	0	0	0	0	0	0	0	0	0	0	0	0
7f0411e3d2bb979a663052f3319a06e2	0	22	41	83	0	0	26	0	0	172	0	0	59	0	0	0	0	0	0	59	0	21	85	0	0	26	0	0	29	161	66	55	0	14	35	0	0	25	195	14	0	0	0	0	0	0	0	0	14
991653d175994497f15122a736bc1ef8	0	0	62	23	0	25	0	55	0	165	0	0	0	0	0	0	0	37	0	37	0	0	63	31	23	0	47	0	86	250	0	78	0	0	47	52	0	65	242	11	0	45	0	0	0	0	0	0	56
fd30445b570e918bd60cfcc5aa8371ef	0	0	0	0	20	9	0	0	0	29	0	0	0	0	0	0	0	0	0	0	0	0	0	0	26	0	31	0	0	57	80	0	0	136	15	0	0	0	231	0	301	21	0	0	0	0	0	0	322
ba8f3fab97a9b02a8cdf9912589e8a96	0	0	39	0	0	21	0	0	77	137	0	0	120	11	0	69	0	0	0	200	0	0	31	0	24	81	0	0	69	205	50	94	0	43	118	0	13	151	469	0	0	48	0	27	119	0	0	0	194
57f761c7c4675dfe0802224b4c79bb14	0	0	0	0	7	0	0	0	0	7	0	0	0	0	0	0	0	0	0	0	0	0	0	0	0	13	0	0	27	40	500	0	0	0	24	0	0	23	547	0	0	0	0	0	0	0	0	0	0
b20dcba7661c877e2cd1a75372cd3685	0	0	0	0	0	0	0	0	0	0	0	0	0	0	0	0	0	0	0	0	0	0	0	0	0	0	0	0	0	0	0	0	0	0	0	0	0	0	0	0	0	0	0	0	0	0	0	0	0
4165da09904e9eeb4b6c1e1dc3112374	0	0	0	0	0	69	35	0	0	104	0	0	0	65	27	0	0	21	0	113	0	0	0	23	0	0	0	0	34	57	0	287	159	0	17	0	76	0	539	0	0	0	0	0	0	0	0	0	0
19f08e33dc222f044069fc5db123bd45	86	0	17	26	12	15	30	12	0	198	0	0	17	0	0	43	0	0	0	60	20	17	68	20	185	0	28	90	47	475	49	0	0	65	65	38	46	27	290	0	0	30	0	0	6	0	0	0	36
8ea420c8eb0d3a1c27e329ac8cfdc663	0	0	0	0	0	0	0	0	0	0	0	0	0	0	0	0	0	0	0	0	0	0	0	0	0	0	0	0	0	0	0	0	0	0	0	0	0	0	0	0	0	0	0	0	0	0	0	0	0
f17faca7968f357878220e5434c7c15b	0	69	0	0	0	0	0	0	0	69	829	0	0	0	0	0	0	0	0	829	0	0	0	0	0	0	0	0	0	0	0	0	0	0	0	0	0	0	0	482	0	0	0	0	0	0	0	0	482
ef07d968a15f1af16f57bde79ae67c40	0	36	0	20	0	0	130	58	0	244	0	0	0	0	0	0	48	53	0	101	0	0	0	12	0	0	48	62	0	122	0	0	0	0	0	25	119	8	152	0	0	0	0	10	0	0	19	0	29
acfd33c5ece8f0ebc9a45888e6824f50	0	0	0	0	0	0	40	0	0	40	0	0	0	0	0	0	40	22	0	62	34	0	39	0	0	35	0	0	0	108	0	56	36	0	34	0	0	0	126	0	0	0	0	0	0	0	0	0	0
25947360b878183362d73e9e2ecb9f16	0	0	0	0	0	0	0	0	0	0	0	0	67	0	0	0	0	0	0	67	0	0	0	0	0	0	0	62	0	62	0	0	0	0	0	0	0	0	0	0	123	77	0	0	0	0	0	0	200
e786d84e2e94d33110bfe6772076327b	146	58	0	26	55	15	0	0	0	300	0	0	0	0	0	0	0	0	0	0	69	0	0	30	0	0	0	64	0	163	0	0	0	82	0	0	0	0	82	0	0	34	0	0	0	0	0	0	34
1d8661beaeebde1724017a5c4b54d54e	0	0	0	0	0	0	0	0	0	0	0	0	45	0	0	39	0	0	0	84	0	30	0	0	20	0	0	0	0	50	53	0	26	0	4	0	0	0	83	17	15	61	13	0	0	10	0	0	116
b65be4d09779b06fde24860e018a30ef	0	0	0	16	31	15	31	0	0	93	49	0	42	0	0	0	36	0	0	127	101	14	41	77	252	56	0	79	37	657	70	0	0	50	36	0	0	0	156	0	40	0	0	0	20	0	5	0	65
c3caba3d57aea3cb9f3e9743571ff06b	0	0	0	87	0	15	0	0	25	127	0	0	0	0	0	0	0	10	0	10	0	0	0	0	0	21	28	0	0	49	0	120	0	0	244	36	0	67	467	0	15	0	15	0	0	0	0	0	30
983da91487c5d77fbe1fd3bda9e561db	0	0	0	0	0	0	0	0	0	0	0	0	42	0	0	24	0	0	0	66	0	0	0	0	0	0	0	0	13	13	38	0	0	0	0	0	0	0	38	18	22	50	16	0	0	0	18	0	124
c1c85f0797775bad59b55c1b7029de2e	0	0	0	0	0	0	0	0	0	0	78	0	36	0	0	0	0	0	0	114	0	0	0	0	384	0	0	0	0	384	0	31	0	0	35	0	65	0	131	0	0	0	0	0	0	0	0	0	0
ae95bc927be5b44154a949b6c2e3b522	0	0	0	22	0	0	0	0	0	22	0	0	0	32	0	0	0	0	0	32	72	0	0	0	0	0	0	0	0	72	75	0	0	0	0	0	0	0	75	0	0	0	0	0	0	1106	0	0	1106
9dbbff9f9e2d3388d61b536979e9f6d9	206	0	0	47	30	0	0	0	0	283	0	0	20	13	22	0	20	7	0	82	62	17	24	54	44	0	0	36	0	237	88	0	0	105	0	46	38	0	277	11	0	0	0	0	0	0	0	0	11
8d634f807e77152fb1ab5d8614ee8198	0	0	0	0	0	0	0	0	0	0	0	0	18	0	0	0	13	0	0	31	0	0	0	0	0	0	0	0	0	0	254	0	84	144	29	0	0	0	511	51	19	24	38	24	0	0	0	0	156
bf082f5d5d055d5952c3448c442196c8	93	0	0	0	0	16	0	0	0	109	0	0	13	0	0	127	0	0	0	140	0	0	26	0	4	43	0	0	19	92	0	12	0	0	218	0	0	79	309	0	0	0	0	0	0	0	0	88	88
c8da865b5d3f8df174321dc852e1e58c	50	0	0	0	25	0	0	0	0	75	30	0	33	0	0	0	0	11	0	74	35	0	0	0	36	7	0	0	0	78	25	0	20	0	0	11	0	0	56	9	48	0	0	0	0	0	0	0	57
f2b96e2b9e7ef0b0817d870ce43ec25d	0	0	0	0	0	0	0	0	0	0	0	0	0	0	0	0	0	0	0	0	0	55	0	0	0	0	0	0	0	55	276	0	26	29	0	0	0	0	331	36	25	0	0	0	8	0	0	0	69
044f4dec1fbe0dd484d4763e5cc66517	0	44	21	26	0	20	37	5	0	153	0	0	0	0	9	0	0	0	0	9	0	33	81	46	185	14	0	44	0	403	0	0	152	0	28	18	160	0	358	0	0	0	0	0	0	0	0	0	0
7245506530841fc58aa1d0c7c3280eef	0	0	8	0	14	24	0	0	78	124	0	0	55	0	0	76	0	0	0	131	0	12	10	0	73	0	0	0	20	115	20	220	0	0	46	22	36	115	459	0	30	31	0	0	34	0	0	0	95
8c9dc22239f64fb5617324b2b3b74d0c	0	0	0	29	0	0	420	0	0	449	0	0	0	0	0	0	48	0	0	48	0	0	0	0	0	0	84	0	0	84	7	0	0	0	0	106	82	0	195	0	0	0	0	0	0	53	0	0	53
8f9a7a707b6cef20fc928883b3cecda3	0	0	0	0	0	0	350	0	0	350	0	0	0	0	0	0	55	0	0	55	0	0	0	36	0	0	86	0	0	122	0	0	0	0	0	94	71	0	165	0	0	0	0	0	0	51	0	0	51
923a5f494451440cb9ccfd5f5207eec1	0	0	0	0	0	0	0	0	0	0	0	0	0	68	0	0	0	0	0	68	0	0	0	0	0	0	0	66	0	66	0	0	0	0	0	0	0	0	0	64	0	0	0	0	0	0	0	0	64
3214032ab2ddd2f25f2e8847bc58f048	0	0	22	11	0	0	0	40	23	96	0	0	32	0	0	0	0	38	0	70	0	0	0	30	87	22	65	43	0	247	0	0	0	0	30	22	42	28	122	0	0	0	0	0	0	0	0	0	0
c6b20caa7dc5fc1677908d31f558bc31	0	0	0	210	0	0	39	443	0	692	0	0	0	0	0	0	0	0	0	0	0	0	0	0	0	0	24	83	0	107	0	0	0	0	0	31	0	0	31	0	0	0	0	0	0	0	0	0	0
672fddf961276a8c1eeb68a58629e564	0	0	41	0	0	0	15	0	97	153	0	0	0	0	0	34	0	20	0	54	0	0	0	0	57	50	28	0	46	181	0	60	0	0	77	0	0	50	187	0	0	20	0	0	0	0	0	6	26
0ebd8173a0a88b81d86b8de90ddbfcff	0	65	0	55	47	31	55	81	24	358	28	0	34	0	16	47	70	54	0	249	0	0	0	0	0	35	48	0	60	143	0	0	0	0	0	68	36	25	129	0	0	0	0	0	0	20	0	0	20
2dbf402ad48bf40ef1e6546f3b2d11d7	0	0	0	26	33	0	0	0	0	59	0	0	0	0	55	0	0	0	0	55	25	0	0	51	0	0	0	0	0	76	206	0	153	95	15	0	0	0	469	0	0	0	17	19	0	0	0	0	36
ea6a8a098f4b4c6a458060923b9325d8	0	0	0	0	0	0	0	0	0	0	0	0	0	0	0	0	0	0	0	0	0	0	0	0	0	0	0	0	0	0	0	0	0	0	0	0	0	0	0	0	0	0	0	0	0	0	0	0	0
3e6a92b488dbac78896eeb3b003ebc08	0	0	22	19	37	0	0	16	0	94	0	5	0	45	44	41	0	36	0	171	0	0	38	36	0	0	0	80	0	154	23	20	0	0	0	0	0	0	43	23	37	36	0	17	0	0	2	0	115
bdc9d7bbb689097c39735e72b46934b3	0	0	0	0	0	13	0	0	8	21	0	0	0	0	19	0	0	0	0	19	0	0	0	0	0	32	0	40	23	95	0	0	0	0	12	0	0	0	12	0	15	0	0	0	0	0	0	0	15
9f551e6c57f3d3794d000dea23679843	0	0	0	0	8	27	0	8	40	83	0	0	0	0	0	0	7	0	0	7	14	0	0	0	0	164	29	16	59	282	0	13	0	0	3	20	0	60	96	0	0	0	0	0	0	0	0	118	118
16c39f1661354a4a7bfcf232eb6bf2bf	0	0	44	0	0	21	0	39	41	145	0	0	0	0	0	0	0	0	0	0	0	0	63	0	0	12	25	0	47	147	0	40	0	0	31	43	0	46	160	0	0	27	0	0	0	0	0	0	27
250bdd966cbd0aa611d935544ec13672	0	0	0	0	0	0	0	0	0	0	0	0	72	0	0	0	0	0	0	72	66	0	53	0	77	0	0	52	43	291	0	0	0	63	0	0	0	43	106	0	65	0	0	0	0	0	0	0	65
402450e1e1ba61f3c028d607e1b7a6d3	39	104	43	32	0	0	60	43	0	321	127	0	0	0	0	0	0	21	0	148	0	0	0	0	94	0	0	0	0	94	118	0	0	0	0	126	31	0	275	0	0	0	0	0	0	0	0	0	0
e8fbda59a709a61bb4daf11ded1a2e34	0	0	0	0	0	0	0	0	0	0	0	0	0	0	0	0	0	0	0	0	0	0	87	0	98	0	0	0	0	185	140	0	0	0	84	0	0	0	224	0	88	0	0	0	0	0	0	0	88
282acc68079c16d3661c7d39f8a65f72	0	0	0	0	0	0	0	0	0	0	0	0	47	35	0	0	0	0	0	82	44	0	46	0	58	0	22	42	0	212	86	0	0	47	43	0	0	37	213	0	0	0	0	0	0	0	0	0	0
2dacb5721cd9dc234d8676797fca1e9a	0	68	0	0	0	0	70	0	0	138	0	0	0	0	0	71	0	95	0	166	0	0	0	0	0	45	0	0	68	113	0	0	0	0	0	90	0	0	90	0	0	0	0	0	36	0	0	58	94
c682718316d72e9f2b76f81707321f35	0	0	7	15	0	58	19	20	10	129	0	0	0	0	0	11	0	7	0	18	0	15	0	14	0	39	0	25	8	101	0	0	55	0	12	11	0	18	96	0	0	0	0	0	0	13	0	9	22
4f177b95b188376f950273b9aa1e24eb	0	0	0	0	0	0	0	0	0	0	0	0	0	0	0	0	0	0	0	0	0	0	0	0	0	0	9	0	0	9	0	14	0	0	0	0	0	16	30	0	0	12	0	0	0	0	0	0	12
2e742477f0c8eb8bb6f6c40a5ee2ddbe	39	47	0	34	0	0	75	39	0	234	58	0	0	0	18	0	40	25	0	141	25	0	0	0	0	0	0	0	0	25	0	0	43	0	0	57	0	0	100	0	0	0	63	0	0	49	10	0	122
8628533a1d8fd1fe4b0975c5a1e7f7bf	96	71	0	50	0	0	0	0	0	217	99	6	23	0	0	54	0	21	0	203	56	0	0	0	167	20	0	0	0	243	0	0	204	21	22	43	98	0	388	0	0	0	0	0	0	0	0	0	0
989585aa1758da021db1b0dac1cc5059	0	0	0	0	31	0	48	46	0	125	36	0	0	26	52	0	0	59	0	173	0	0	0	50	0	0	0	53	0	103	0	0	58	31	28	28	0	0	145	16	0	0	31	33	0	12	37	5	134
654f12ec50b791ad9fc82b5f152d316f	78	0	0	0	0	0	0	0	0	78	0	0	0	0	0	0	0	0	0	0	0	31	0	0	0	0	0	0	0	31	875	0	0	0	0	0	0	0	875	0	0	0	0	0	0	0	0	0	0
202e9d5a63bf0b732ec3c57460d58339	0	0	0	0	0	0	0	0	0	0	0	0	0	0	0	0	0	0	0	0	0	0	0	0	0	44	0	29	31	104	40	40	0	11	68	0	27	98	284	0	19	55	0	0	18	0	14	16	122
9a0340294cd4d93f859afc22fbff9d45	120	120	0	0	0	0	0	16	0	256	0	0	0	0	0	0	25	16	0	41	61	0	0	0	32	0	18	38	0	149	36	0	93	0	34	62	0	0	225	0	0	0	0	11	0	0	0	0	11
1b129c16744a0340435af549c63ed3c8	198	68	0	22	0	34	0	0	0	322	0	0	42	31	19	0	6	0	0	98	58	17	39	30	51	0	8	39	0	242	0	0	82	57	20	20	43	11	233	0	0	0	0	0	0	0	0	0	0
c96048d0796eeda280e7c0948d93d598	0	39	0	0	0	0	0	0	0	39	404	0	0	0	0	0	0	0	0	404	0	0	0	0	0	0	0	0	0	0	0	0	0	0	0	0	0	0	0	489	0	0	0	0	0	0	0	0	489
eb5c5dc1093a844bfbfbd485469727d0	41	0	47	0	9	0	0	0	0	97	0	0	28	0	0	36	13	0	0	77	0	0	0	0	0	0	0	42	10	52	0	48	205	38	0	0	44	11	346	0	0	0	0	0	0	0	0	0	0
89729f456fb09f229f464ebce777246d	127	0	0	28	20	0	0	0	0	175	29	10	52	40	8	0	0	0	0	139	142	11	0	0	0	0	0	0	0	153	7	45	0	59	0	0	0	0	111	0	0	0	0	0	0	0	0	0	0
4cf0f03216443e393404d6fa1d934307	0	0	0	0	0	0	0	0	0	0	49	0	0	0	0	0	0	0	0	49	0	0	0	0	0	0	29	34	0	63	19	0	0	21	0	0	0	0	40	42	18	0	0	0	0	0	0	0	60
139ab00f27b7fe66c318523b8a2ff8c8	0	36	63	0	0	0	81	0	0	180	102	0	0	0	0	0	50	79	0	231	0	0	61	0	0	67	0	39	0	167	0	0	92	0	0	62	0	0	154	0	0	0	0	0	0	0	0	0	0
bb2784b3c36562ad654b6ad726336247	0	26	23	18	4	19	14	4	0	108	58	0	44	9	15	5	0	0	0	131	0	15	0	0	10	23	0	0	11	59	0	24	0	156	74	0	0	19	273	0	20	35	0	11	0	0	0	5	71
65acc3819fc2df7a4a1f30ec940a3291	0	0	0	0	0	0	0	0	0	0	0	0	0	0	0	0	0	0	0	0	0	0	0	0	43	20	0	0	0	63	0	0	0	0	35	0	0	0	35	0	0	0	0	0	0	0	0	33	33
c9e505172ac8eb43c55f380881c51bbd	0	0	0	0	0	0	0	0	0	0	76	0	0	0	0	0	0	0	0	76	0	0	70	0	0	0	0	64	0	134	130	0	0	0	0	0	0	0	130	0	118	0	0	0	0	0	0	0	118
86b4406a48102b1820f6c038c64a1b94	0	10	29	41	0	0	22	0	0	102	0	0	22	0	0	0	0	0	0	22	0	12	37	0	0	17	0	0	13	79	35	28	0	3	9	0	0	10	85	9	0	0	0	0	0	0	0	0	9
15108f6eb51edf12ce2f84f42505892f	108	0	0	0	0	0	0	0	0	108	0	0	0	0	0	0	0	4	0	4	34	0	0	30	30	0	0	27	0	121	39	0	0	52	33	0	23	0	147	0	21	31	0	0	0	0	23	0	75
5ad17a047ddefe3394ac766098dcb935	0	0	0	0	0	0	0	0	0	0	37	0	0	0	0	0	0	0	0	37	0	0	0	0	0	0	0	0	0	0	0	0	0	22	0	0	0	0	22	37	15	0	16	0	12	0	0	0	80
ba653409d408d3f113e6d8498ce46ae5	0	0	0	0	0	0	0	0	14	14	0	0	30	21	0	0	0	0	0	51	23	0	30	0	34	0	21	30	23	161	52	0	0	34	33	0	0	15	134	0	0	14	0	0	22	0	0	8	44
bb8d0e84738f9ce0058a57dc5c0d5cb3	0	0	0	44	0	0	0	0	0	44	0	0	0	0	0	0	17	0	0	17	0	0	0	0	0	0	0	0	0	0	0	70	0	0	132	37	24	36	299	0	12	0	0	0	19	0	0	32	63
b00fefdcec7b72744ac3f3895668e0ec	0	0	0	0	0	0	0	0	0	0	0	0	0	0	0	0	0	0	0	0	0	0	0	0	0	0	0	0	0	0	0	0	0	0	0	0	0	0	0	58	0	0	0	33	0	0	44	0	135
46fa91c4ac4fc4c067fb6c8cccd22681	27	53	0	0	15	0	0	11	0	106	38	0	0	14	36	0	0	7	0	95	0	60	0	0	20	0	0	0	0	80	134	0	0	0	0	12	0	0	146	0	0	0	0	0	0	0	0	0	0
121b77facaa19f7fa2418b105538785e	109	39	0	0	0	0	0	0	0	148	108	0	0	0	0	29	0	0	0	137	45	0	45	0	0	0	30	106	0	226	0	0	268	54	0	0	45	0	367	0	0	0	0	0	0	0	0	0	0
fca466b4fa788c5b533dfd1cf7840e70	0	0	0	0	0	0	14	12	0	26	0	0	0	0	0	0	0	20	0	20	0	0	0	21	47	0	36	0	0	104	0	0	0	0	0	0	20	0	20	0	0	0	9	3	25	0	0	0	37
4e98e8667b36512194e9e7115688f5e4	0	0	0	133	0	0	302	21	0	456	0	0	0	0	0	0	15	0	0	15	0	32	0	0	0	0	53	0	0	85	0	0	0	62	0	20	0	0	82	0	0	0	0	0	0	15	0	0	15
8b06e0d70f86870079660ae4d760a945	0	77	44	0	0	0	70	0	0	191	150	0	0	0	0	37	0	0	0	187	0	0	31	0	33	0	0	116	0	180	0	0	175	58	0	21	50	0	304	0	0	0	0	0	0	0	0	0	0
bea997cb6d7dbe14a1ef31fbff80d32f	0	0	25	0	0	0	16	0	0	41	0	0	40	0	10	0	8	0	0	58	87	9	0	34	0	0	33	0	0	163	148	0	39	52	0	21	60	0	320	29	4	0	0	8	0	0	0	0	41
3c16e74d697bcb3a2071ec152970c119	0	0	0	19	18	0	0	0	0	37	0	0	27	0	0	0	0	0	0	27	0	0	0	0	0	43	0	0	24	67	0	44	0	33	54	0	0	0	131	0	0	52	0	0	0	0	0	0	52
e3c1f5d2f6f5a1599554b973fe5dbe75	92	46	0	15	35	0	0	0	0	188	0	0	0	0	0	0	0	0	0	0	37	0	0	0	0	0	0	36	0	73	0	0	0	37	0	0	0	0	37	0	0	29	0	0	0	0	0	0	29
c54c24eb7a280c6e4f65858eaab900b5	55	0	0	0	0	0	0	0	0	55	0	0	0	0	0	72	0	0	0	72	0	0	0	0	0	27	0	0	0	27	0	0	0	0	78	0	0	26	104	0	0	0	0	0	6	0	0	83	89
6abdf2eac7643cdeec5e8fabc48277e7	0	0	0	0	0	0	0	0	0	0	0	0	0	0	0	0	0	0	0	0	0	0	0	0	0	0	0	0	0	0	0	0	0	0	0	0	0	0	0	0	0	0	0	0	0	0	0	0	0
9bf933f52198d6adceb4cc63f73ae291	0	0	0	0	0	19	17	50	11	97	0	0	0	0	0	34	0	0	0	34	37	0	34	0	0	0	0	0	53	124	0	21	0	0	47	38	0	0	106	0	0	23	0	0	0	0	0	0	23
32a6d9c2936949f398cbe88ea86772c7	0	0	0	44	0	0	36	0	0	80	64	0	0	12	22	0	47	30	0	175	0	0	44	31	0	0	16	0	0	91	0	54	34	0	45	34	16	0	183	0	0	0	0	0	7	11	0	16	34
96d61e70d79651bb3b9ac53785d284f0	0	0	0	23	0	0	52	0	0	75	30	0	0	20	0	0	21	0	0	71	0	0	0	19	0	0	0	0	0	19	0	0	28	0	0	35	0	0	63	14	0	0	59	0	0	50	0	0	123
540256037e96ccbe0cffdab4746f6ed2	0	15	0	0	0	0	29	0	0	44	0	0	14	0	0	25	0	0	0	39	0	0	0	0	0	0	0	0	0	0	18	144	67	0	0	0	44	0	273	0	0	0	26	0	0	0	0	0	26
905bc11aad87f683f190ca83435ec944	0	0	0	0	0	0	0	5	29	34	0	0	28	0	0	0	0	0	0	28	27	39	44	0	227	18	0	0	8	363	185	51	0	0	0	10	0	18	264	0	0	6	0	0	0	0	0	0	6
08b03f5cbe5e104920df39b4ca5f9da3	39	0	0	0	0	0	0	0	0	39	0	0	0	0	0	21	0	5	0	26	14	0	36	16	96	4	0	51	29	246	24	0	0	25	35	0	0	0	84	0	14	0	0	0	0	0	0	0	14
28f1d70b62b2e4dced14c8eb6cca8221	0	23	23	0	0	0	0	0	0	46	0	0	0	0	0	0	0	0	0	0	0	0	36	0	0	0	0	0	27	63	0	15	0	0	0	0	0	0	15	0	6	7	0	0	0	0	0	0	13
fc76ec0acb53325b657294f54be5ba2c	0	0	0	0	0	43	83	53	41	220	0	0	0	0	0	0	56	50	0	106	0	0	0	0	0	27	37	0	57	121	0	0	0	0	0	0	0	0	0	0	0	0	0	0	0	0	0	0	0
06409b4ed250d336bca804aeb0ab0017	0	0	0	0	0	0	0	0	0	0	0	0	0	0	0	0	0	0	0	0	0	0	0	0	0	0	0	0	0	0	0	0	0	0	0	0	0	0	0	0	0	0	0	0	0	0	0	0	0
d89fd1963e85e239cf2c415f07b79dee	0	27	0	0	0	30	42	43	7	149	18	0	0	0	0	0	0	0	0	18	0	0	27	0	0	41	0	0	49	117	0	0	0	0	33	34	0	40	107	0	0	0	0	0	0	0	0	0	0
7328cd9fb68ce12d8640a5e4323f89ca	0	0	0	0	0	0	70	0	0	70	83	0	0	0	0	28	52	56	0	219	0	0	53	0	0	0	0	0	0	53	0	0	0	0	0	43	0	0	43	0	0	0	28	0	0	0	0	0	28
f2080245dfda0ba7b0081753a8ffff6d	0	0	0	33	0	0	0	0	0	33	0	0	283	0	0	25	0	0	0	308	4	0	0	25	0	11	0	16	0	56	0	0	0	0	0	0	0	0	0	0	0	0	0	0	0	6	0	0	6
465bef7036d63c5bba9d5f1b62a6dd7e	0	0	0	0	23	0	27	0	32	82	0	0	0	0	0	20	28	0	0	48	0	0	81	0	120	0	0	0	0	201	0	159	0	0	0	0	43	0	202	0	0	0	0	0	0	0	0	4	4
41f3fe07a2973ef1331e8df759db80f1	0	0	0	0	0	0	0	0	0	0	0	0	0	0	0	0	0	0	0	0	0	0	0	0	0	0	0	0	0	0	0	0	0	0	0	0	0	0	0	0	0	0	0	0	0	0	0	0	0
21ad69e9b470eff6075689f4210174d9	0	0	0	0	0	0	0	0	0	0	0	0	0	0	0	0	0	0	0	0	90	0	91	0	0	0	0	0	0	181	142	0	0	99	0	0	0	0	241	0	0	0	0	0	0	0	0	0	0
4bee6143c0906417bb1df02e4f171734	0	0	0	0	0	0	0	0	9	9	0	0	19	15	0	0	0	0	0	34	22	0	38	0	13	0	14	21	13	121	35	0	0	20	24	0	0	11	90	0	0	14	0	0	19	0	0	15	48
e14d9340271d04ec117fcdffc7c84e5c	0	50	0	46	0	0	17	0	0	113	136	0	31	0	0	17	0	0	0	184	0	0	0	0	0	0	0	0	0	0	0	116	113	0	0	0	0	0	229	0	0	0	0	0	0	0	0	0	0
7a875a74d21011f97ad4a0e0770af56a	0	21	0	31	13	12	58	31	34	200	5	0	0	9	12	0	32	69	0	127	21	0	0	8	0	26	19	16	33	123	0	7	0	37	67	12	3	23	149	0	0	0	0	0	0	0	0	0	0
83220d90791fcfda4bbea1ef0f055403	0	0	0	25	46	12	0	21	8	112	0	0	0	0	0	0	42	30	0	72	0	0	0	37	148	0	33	29	0	247	9	0	0	65	0	34	83	0	191	0	0	0	0	7	0	0	0	0	7
6e4e803c5ba8aacdde38734bdaf6bc57	26	0	0	0	0	0	0	0	0	26	185	0	0	0	8	0	0	8	0	201	36	0	38	0	125	0	0	41	0	240	0	0	90	0	25	0	35	0	150	0	0	0	0	0	0	0	0	0	0
5c8ec4de925b7ab3947fb0658e9ca7af	0	132	0	0	0	0	0	0	0	132	0	0	0	0	0	84	0	38	0	122	47	18	0	0	68	0	0	48	0	181	24	0	61	95	0	0	63	19	262	0	0	0	0	0	0	0	0	0	0
58fdc1d8a82400cb900a7b3e9b6811c2	0	0	0	12	0	0	26	29	0	67	0	0	0	12	4	23	0	0	0	39	4	9	0	18	0	0	0	0	6	37	148	0	0	0	0	0	0	0	148	0	4	12	0	8	0	0	0	0	24
420d26fbe3d4d2eea9d16890c30425b7	0	0	0	0	0	0	0	0	0	0	0	0	0	0	0	0	0	0	0	0	0	0	0	0	0	0	0	0	0	0	25	0	0	0	0	0	0	0	25	26	32	24	0	0	18	0	0	0	100
dfb49a48238c7d9105d80c0108cf4751	0	49	0	0	0	0	0	0	0	49	0	0	0	0	0	46	0	0	0	46	61	0	0	0	28	41	0	0	0	130	0	89	63	37	0	23	31	0	243	0	0	0	0	4	0	0	0	0	4
adbc4656f8d10009f4494060e4e27fd4	0	0	0	11	0	0	0	0	0	11	0	0	0	0	0	0	0	0	0	0	48	0	29	42	139	0	0	46	18	322	0	0	0	0	0	0	0	0	0	0	36	35	0	0	0	8	0	0	79
5136141953986f3fb8e9ff36df903339	0	0	0	0	0	0	0	0	0	0	0	0	0	0	0	0	0	0	0	0	0	0	0	0	0	0	0	0	0	0	48	0	0	0	0	0	0	0	48	17	35	21	0	0	20	0	0	0	93
5db9dcfa5b0275246a9e0082deba4fe3	0	0	0	0	0	0	0	0	0	0	0	0	0	0	0	0	0	0	0	0	0	0	0	0	0	0	0	0	0	0	0	0	0	0	0	0	0	37	37	0	0	0	0	0	0	0	0	0	0
63218a04c57387ac7276c1c63e6fcc5d	0	0	0	0	0	0	28	0	0	28	0	0	0	0	0	0	0	0	0	0	0	0	0	0	0	0	0	0	0	0	0	0	0	0	0	0	0	0	0	0	0	0	0	0	0	0	0	0	0
1025128fc0377a1b4310ce5a2e5c8860	0	0	19	9	27	0	42	0	0	97	90	0	0	0	0	0	47	0	0	137	0	0	0	0	0	21	12	0	23	56	0	28	0	0	93	31	0	51	203	0	12	22	0	7	31	0	0	0	72
7c0ac0d0892152435d068cb2b640fd78	0	0	30	40	0	0	0	0	14	84	0	0	0	0	0	0	0	0	0	0	55	0	48	33	23	0	0	0	0	159	33	31	0	23	0	0	0	0	87	0	30	0	0	0	0	0	0	0	30
4c290136b7c738a3b272be814db6b99a	0	11	0	19	0	3	0	0	0	33	35	0	3	0	0	0	0	0	0	38	22	0	0	3	0	0	8	39	3	75	0	12	38	18	0	14	4	0	86	0	0	0	0	0	0	0	0	0	0
55b1731544a7e9b8c95550ba2bb67cfc	0	0	0	0	0	38	0	0	60	98	0	0	0	45	0	0	0	0	0	45	0	0	0	0	0	0	0	70	38	108	0	0	0	0	58	0	0	0	58	0	0	0	0	0	0	0	0	0	0
dae4b5d118d22ea997213db791b84cda	0	0	0	7	0	0	0	0	0	7	0	0	24	0	0	0	0	0	0	24	0	0	0	0	0	22	0	0	21	43	0	11	0	21	28	0	0	0	60	0	0	53	0	0	0	0	0	0	53
76bc5c2ffcf089a33f6b46e948c15688	0	0	0	0	0	0	0	0	0	0	0	0	0	0	0	0	0	0	0	0	0	0	0	26	0	0	0	0	0	26	91	0	83	45	0	0	0	0	219	16	13	0	23	24	0	0	0	0	76
538119b0b2b8e15dff095602498d728d	0	0	0	0	0	0	0	0	0	0	0	0	0	0	0	0	0	0	0	0	66	0	62	0	0	0	0	0	0	128	100	0	0	0	0	0	0	0	100	0	114	0	0	0	0	0	0	0	114
fcea40f6bf940a85335559478ee882b7	0	0	0	0	0	27	0	0	0	27	0	0	0	0	0	0	0	0	0	0	0	0	0	0	0	0	21	0	0	21	0	0	0	0	0	0	0	0	0	5	0	0	0	0	3	0	0	0	8
23f40a4818e0f3cea4cc3ae52bc84ac4	0	64	0	0	0	0	23	0	0	87	70	0	0	0	0	0	0	0	0	70	0	0	0	0	50	0	24	0	0	74	62	0	0	0	0	54	0	0	116	0	0	0	0	0	0	0	0	0	0
32e284f5e6f32ace90f026df51d01ff0	61	0	7	0	0	0	0	0	0	68	15	0	18	0	0	0	0	29	0	62	97	0	0	0	0	0	0	0	11	108	0	0	0	26	0	0	0	0	26	18	0	0	21	0	0	0	0	0	39
d2a2de7b5324bf346b203ae22fd038ab	0	0	0	0	0	0	0	0	0	0	12	0	21	14	0	0	0	0	0	47	16	0	12	0	33	0	0	13	0	74	31	16	0	19	20	0	0	0	86	9	13	16	0	0	0	0	8	0	46
096bb884430ecec76bc8f00c2f337a10	0	0	0	0	0	0	0	0	0	0	0	0	0	28	0	0	0	0	0	28	33	0	0	0	0	0	0	0	0	33	61	0	0	30	22	0	0	0	113	0	47	0	0	0	0	0	0	0	47
055a10791bad896beedca0de83fd17fd	0	0	35	0	0	0	0	0	0	35	292	0	0	8	0	28	0	0	0	328	18	0	0	30	6	0	13	23	0	90	0	0	115	23	25	0	0	0	163	0	0	0	0	0	0	0	0	0	0
ec6c25f331fb7f99ba25e91b30df8e3b	0	0	0	0	0	0	0	0	10	10	0	0	0	0	0	0	0	0	0	0	0	0	0	0	0	0	0	0	26	26	0	0	0	30	26	0	0	0	56	0	35	0	0	0	0	0	0	0	35
0d80ccc78eaf289cc1d522a8b1395bf2	0	48	37	0	24	0	0	0	0	109	0	0	14	0	0	0	0	0	0	14	12	25	0	0	96	16	0	0	0	149	0	0	106	0	0	0	0	15	121	0	0	0	0	0	0	0	0	0	0
74285d0632653a83c012bab4ab4aa00c	8	23	0	0	0	0	0	0	0	31	19	0	0	0	19	0	0	0	0	38	0	26	0	0	0	0	0	0	0	26	95	0	0	0	0	0	0	0	95	19	0	0	0	0	0	0	0	0	19
96e48a134cb0e1a056f9609ef1b68ccd	0	0	0	0	0	0	0	0	9	9	0	0	0	0	0	0	0	0	0	0	0	0	0	0	0	0	0	0	11	11	0	0	0	25	33	0	0	0	58	0	49	0	0	0	0	0	0	0	49
634eddba622a16b515909bdf28c77480	0	0	11	0	0	0	15	33	10	69	0	0	0	15	0	0	0	0	0	15	0	0	19	0	0	0	0	0	54	73	0	18	0	0	31	25	0	0	74	0	0	17	0	0	0	0	0	0	17
a77f83321030f6c3b0aff814825582b3	69	0	0	9	11	11	31	0	0	131	0	0	0	0	0	0	14	0	0	14	0	0	0	0	0	0	19	0	0	19	0	0	0	0	10	8	0	0	18	0	0	4	0	0	0	0	0	0	4
357699d9157d7cc038d5931c9a915598	0	50	0	24	0	0	0	0	0	74	82	0	0	0	0	0	0	0	0	82	0	0	0	0	0	0	0	0	0	0	0	0	62	0	0	0	0	0	62	0	0	0	50	0	0	0	0	0	50
3e7065bde45b29226728f131a8e165b6	2	0	0	84	0	0	24	7	0	117	44	0	0	15	14	27	31	70	0	201	21	0	21	42	0	0	19	0	13	116	0	42	30	0	0	19	0	18	109	0	0	0	0	0	0	0	0	0	0
7d0b82900291cb09473c8510f54885f9	0	0	0	0	0	0	0	0	0	0	9	0	10	12	0	0	0	0	0	31	9	0	11	0	19	0	0	9	0	48	19	9	0	13	15	0	0	0	56	11	26	26	0	0	0	0	8	0	71
82dbc180720bec8ce961edce9f1a4ca8	0	0	0	0	0	0	0	0	0	0	0	0	0	0	0	0	0	0	0	0	0	0	0	0	0	0	0	14	0	14	0	0	0	0	0	0	0	0	0	50	0	0	0	0	9	0	0	0	59
bf7d4373ecbe37b672f6bb1ca09b6c7a	0	0	0	0	0	0	0	0	0	0	0	0	18	0	0	0	0	0	0	18	24	0	0	0	0	0	0	0	0	24	0	0	0	32	30	0	0	0	62	0	0	12	0	0	13	0	12	0	37
b2c64e626658193403b2a1e18a67b473	0	0	0	0	0	18	17	30	14	79	0	0	0	0	0	0	0	0	0	0	0	0	0	0	0	0	18	0	31	49	0	0	0	0	15	22	0	29	66	0	0	17	0	0	0	25	0	0	42
0c74df28a2311d5067a60e4156bd8336	0	0	0	0	0	0	0	0	0	0	194	0	11	13	0	0	0	0	0	218	0	0	0	0	43	15	0	0	0	58	0	0	153	14	41	18	106	26	358	0	0	0	0	0	0	0	0	0	0
97301adddf4560991d3e3b956dd083e5	53	51	13	0	0	0	0	0	8	125	0	0	0	0	0	0	0	0	0	0	8	23	0	0	44	0	0	24	0	99	119	0	0	0	0	0	0	0	119	0	6	0	0	0	0	0	0	0	6
b18d53deb778c0861005642e2094b5f5	175	13	0	0	0	0	0	0	0	188	0	0	0	0	15	0	14	0	0	29	0	0	58	0	0	0	0	0	0	58	0	0	240	40	16	0	27	21	344	0	0	0	0	0	0	0	0	0	0
5f4df27d802c0b78427cc8b06a76bf84	0	0	32	0	0	0	0	0	0	32	0	0	0	20	0	22	10	5	0	57	46	13	0	0	0	0	9	109	0	177	0	0	137	7	54	71	0	0	269	0	0	0	0	0	0	0	0	0	0
ba8c2b36e32ae197d1839292991747f9	0	0	13	0	0	17	0	0	7	37	0	0	19	0	0	0	0	0	0	19	0	26	0	0	0	0	0	0	0	26	15	0	0	56	0	0	0	0	71	0	0	13	0	0	0	0	0	0	13
8555095c24b8640987feec5c507944d6	0	0	0	0	0	0	100	0	0	100	96	0	0	0	0	0	95	108	0	299	0	0	89	0	0	0	55	0	0	144	0	0	0	0	0	0	0	0	0	0	0	0	0	0	0	0	0	0	0
28860401b164d3dbf416494cca3930b1	0	0	0	0	0	0	0	0	0	0	0	0	0	0	0	0	0	0	0	0	0	0	0	0	0	0	0	0	0	0	0	0	0	0	0	0	0	240	240	0	0	0	0	0	0	0	0	0	0
9f08e1272fb0cf6378f2600f2a88ed6b	0	0	0	0	0	0	0	0	0	0	0	0	0	0	0	0	0	0	0	0	0	0	59	0	0	0	0	0	0	59	81	0	0	0	0	0	0	0	81	0	101	0	0	0	0	0	0	0	101
d369d5ca8df54d486c73586551e086f7	0	0	0	0	0	24	0	0	0	24	0	0	0	25	0	0	0	0	0	25	22	0	0	28	78	0	0	37	0	165	0	97	28	19	0	24	0	0	168	0	19	27	0	0	0	0	0	0	46
02ddbd65d42a088d60e8b685e0bd8c97	0	104	0	0	0	0	8	0	0	112	0	0	0	0	0	23	0	0	0	23	0	0	0	0	25	0	33	0	0	58	0	0	356	0	28	0	0	10	394	0	0	0	0	0	0	0	0	0	0
891b79e1ac15d32daadd7eeb9102e4f9	0	0	0	35	34	0	0	0	0	69	0	0	0	0	0	0	0	0	0	0	0	0	0	0	13	0	0	0	0	13	0	0	0	0	0	0	0	0	0	25	0	20	0	0	0	0	0	0	45
633bff25359f4db768933f90507af0d5	0	46	0	0	0	0	0	0	0	46	285	0	0	0	0	0	0	0	0	285	0	0	0	0	0	0	0	0	0	0	0	0	0	0	0	0	0	0	0	279	0	0	0	0	0	0	0	0	279
0199659434eb4899fd2923c46d0f43a9	0	0	0	0	0	0	0	0	0	0	0	0	0	0	17	0	0	12	0	29	39	10	0	23	51	0	0	0	0	123	30	0	0	0	0	0	0	0	30	0	34	0	0	0	0	0	0	0	34
37d992d00bd2eb13dc24eb7bcccbab62	0	9	11	6	27	0	0	0	2	55	120	6	50	7	18	7	0	5	0	213	11	2	0	0	31	12	0	0	3	59	24	8	0	16	0	0	0	11	59	13	8	0	0	3	0	0	0	0	24
b230476ec64ae7ba593e4e3d760c8288	0	0	0	0	0	0	0	0	0	0	0	0	14	0	0	0	0	0	0	14	20	0	0	0	0	0	0	0	0	20	0	0	0	23	14	0	0	0	37	0	0	12	0	0	23	0	13	0	48
13f05a3417e8a989fe6e52ddc90d4467	0	0	0	0	0	22	0	0	0	22	0	0	0	0	0	0	4	0	0	4	0	0	0	0	0	38	34	0	29	101	0	0	0	0	24	0	0	13	37	0	0	0	18	0	0	0	0	0	18
a4f7c5fae972f148753cd0cc220e8f3e	0	0	0	0	0	0	0	0	21	21	0	0	21	0	0	0	0	0	0	21	0	0	0	0	0	0	0	0	0	0	0	0	0	0	0	0	0	0	0	0	0	0	0	0	0	0	0	22	22
c5c3eb212ecc7b7954eccbede56f829c	0	0	0	0	0	0	0	0	0	0	0	0	169	0	0	0	0	0	0	169	0	0	0	0	0	0	0	0	0	0	0	0	0	0	0	0	0	0	0	0	0	0	0	0	0	0	0	0	0
bb8df1739d657fd3e060ae60770a31fe	0	24	0	0	0	0	0	0	0	24	0	0	0	0	0	0	0	0	0	0	0	0	30	8	0	94	0	0	37	169	0	0	0	0	0	0	0	9	9	0	0	0	0	0	0	0	0	0	0
9d893551677295440fad0ccdcb8addc9	0	0	0	60	62	0	0	82	0	204	0	0	58	0	0	64	0	71	0	193	0	0	0	0	0	52	0	0	0	52	0	0	0	0	0	0	0	0	0	0	0	0	0	0	0	0	0	0	0
6b4c6437a190e64ed8b9d17dce6cd80e	66	38	0	0	0	0	0	0	0	104	0	0	28	0	0	37	0	0	0	65	12	0	0	29	70	0	0	17	0	128	13	0	0	0	0	0	7	0	20	0	0	0	28	7	0	0	0	0	35
c11fcf64bb610412363c981544393516	0	0	0	0	0	0	0	0	0	0	0	0	0	0	0	0	0	0	0	0	0	0	0	0	0	0	0	0	0	0	0	0	0	0	0	0	0	0	0	0	0	0	0	0	0	0	0	0	0
63cf31824ff65035dbbf2233064fa5a1	0	0	0	0	0	0	0	0	0	0	131	0	0	0	0	0	88	0	0	219	0	0	93	0	0	70	0	0	0	163	0	0	0	0	0	88	0	0	88	0	0	0	0	0	0	0	0	0	0
ccac431f22cfee6982cfe86e0526fb1a	0	0	0	0	11	0	0	0	0	11	0	0	27	0	0	0	0	0	0	27	34	15	0	30	37	17	16	52	13	214	21	0	0	0	0	0	0	9	30	0	0	0	0	0	0	0	0	0	0
7324134fa70b5f27cd670e1aff7204ab	0	0	0	0	0	0	29	0	0	29	0	0	0	0	0	0	0	0	0	0	0	0	41	0	94	0	0	0	0	135	0	0	64	0	0	0	70	0	134	0	0	0	0	0	0	0	0	0	0
5b63b60a4d6366978056b5687331cf17	0	22	0	0	0	0	0	0	0	22	0	0	0	10	0	11	0	0	0	21	0	0	13	0	26	0	11	13	0	63	0	0	0	0	0	0	0	0	0	0	0	0	0	0	0	0	0	0	0
8a6c1fe3c3d26a1707ef8ff73da54f91	55	0	0	0	0	4	0	0	0	59	18	0	0	13	10	25	0	9	0	75	40	0	0	0	0	0	0	0	5	45	0	22	0	0	0	0	0	0	22	0	0	0	0	0	0	0	0	0	0
13a90e47d070f0d9e5c13976b8ebfc67	52	0	0	0	0	44	0	0	6	102	0	0	0	4	3	0	5	0	0	12	0	0	0	31	0	28	5	0	106	170	0	0	0	0	0	20	0	0	20	0	0	0	0	0	0	0	0	0	0
9580f203f27bec14d0688c29e52a49c9	0	0	0	0	0	0	0	0	0	0	0	0	0	0	0	0	0	3	0	3	0	0	0	0	23	97	0	0	34	154	0	0	0	0	0	0	0	41	41	0	0	4	0	0	19	5	0	93	121
8353b7b46f0cc3f5ab5c09976b33c576	0	0	0	0	0	0	64	0	0	64	50	0	0	0	0	0	38	51	0	139	44	0	70	57	0	0	0	0	0	171	0	59	0	0	0	37	0	0	96	0	0	0	0	0	0	0	0	0	0
bbd0dd9c4242e75cc0774c8ea3420806	0	0	0	0	0	0	13	26	0	39	0	0	0	0	0	0	8	0	0	8	0	0	0	8	0	0	8	0	0	16	89	0	0	0	0	0	0	0	89	0	0	0	0	0	0	6	0	0	6
698114c4859c15ffde6264d7876c2883	0	0	0	0	0	0	0	0	0	0	0	0	0	0	0	60	0	0	0	60	0	0	0	0	0	0	0	0	0	0	181	0	0	0	0	0	0	79	260	0	0	0	0	0	0	0	0	0	0
405ad3823f0de085dd2e4af77e8410b7	0	48	0	0	0	0	0	0	0	48	0	0	0	25	21	0	0	68	0	114	0	0	0	0	0	0	0	0	55	55	0	0	32	0	0	0	43	0	75	0	0	0	0	0	0	0	0	30	30
43fb2a1d33b1423a4d6431eab6a224f7	0	0	0	0	0	0	0	0	0	0	0	0	0	0	0	0	0	0	0	0	0	0	0	0	0	0	0	0	0	0	47	0	16	26	0	0	11	0	100	53	21	24	0	9	0	0	0	0	107
f3a5cf06e5eb0a44921da5c80c031293	62	0	48	0	0	0	0	0	0	110	0	0	40	0	0	0	0	0	0	40	18	0	0	29	67	0	0	26	0	140	0	0	0	0	0	12	0	0	12	22	7	0	0	0	0	0	0	0	29
1415aa91bbbda12b4603ef12b03d263a	109	0	0	0	6	0	0	13	0	128	0	0	0	0	0	0	0	0	0	0	0	0	0	29	0	0	0	0	0	29	13	23	0	80	32	0	0	17	165	0	0	11	0	0	0	0	7	0	18
cb36cafcfda1c4cafcc2955fad3b2991	0	0	0	24	13	0	36	0	0	73	40	0	0	0	30	26	32	34	0	162	34	0	0	0	0	39	22	31	0	126	0	26	36	0	0	32	0	0	94	0	0	0	0	0	0	0	0	0	0
c957c779f68d251c30a25030e3bf2385	107	0	0	0	0	0	36	0	0	143	239	0	0	8	0	0	0	0	0	247	63	0	0	0	0	0	0	0	18	81	0	0	0	27	48	0	0	0	75	0	0	0	0	0	0	0	0	0	0
6d804ed0e9040545a0c9049ff11c568d	0	133	0	33	0	0	0	0	0	166	0	0	0	0	0	0	0	0	0	0	0	108	0	0	0	0	0	0	0	108	74	0	0	37	0	0	0	0	111	0	0	0	0	0	0	0	0	0	0
a11647ea5b421713ef1c87555086577e	0	0	0	0	0	0	0	0	0	0	0	0	0	0	0	0	0	0	0	0	0	0	0	0	0	0	0	0	0	0	0	0	0	22	0	0	0	0	22	0	35	0	0	0	0	0	0	0	35
762f54e25739d362746fa10ed3064863	0	83	0	21	0	0	33	0	0	137	69	0	0	18	0	37	0	0	0	124	0	0	0	0	0	44	0	0	0	44	0	0	103	36	53	0	33	0	225	0	0	0	0	0	0	0	0	0	0
8e63c47ba0db599bf3d693177df8ca17	152	0	26	0	0	0	0	0	0	178	0	0	0	9	0	0	0	0	0	9	0	0	0	53	6	0	0	0	0	59	38	0	0	0	0	0	0	0	38	0	38	18	0	0	0	0	0	0	56
9e25bf2ad391afe36b978d4a29a49bb1	0	0	0	0	0	0	0	0	0	0	0	0	0	0	0	0	0	0	0	0	0	0	0	0	0	0	0	0	0	0	0	0	0	0	0	0	0	0	0	0	0	0	0	0	0	0	0	0	0
450ffcf911a42457aa836ef6db5afb5e	0	0	0	18	0	0	0	0	0	18	0	0	47	0	0	0	0	0	0	47	0	0	0	0	0	43	0	19	16	78	0	0	0	42	0	0	0	16	58	0	0	0	0	0	12	0	0	0	12
b3a88888f37cab592cc1168d85eb47ba	0	0	29	0	0	27	0	0	0	56	0	0	0	0	0	0	0	0	0	0	0	0	92	0	58	0	10	35	53	248	25	0	26	0	25	0	0	0	76	0	0	20	0	0	0	0	0	13	33
2e962151c7a3f71f7a09756748443189	0	0	0	0	0	0	0	0	0	0	136	0	0	0	0	0	6	0	0	142	17	0	35	0	39	13	0	0	0	104	0	0	35	0	12	24	46	0	117	0	0	0	27	26	0	0	0	0	53
5918466d89aec58096186c4eb1e4a738	4	24	0	8	13	0	0	17	0	66	10	0	0	25	19	0	0	7	0	61	0	0	0	0	6	12	0	0	0	18	17	38	0	0	0	11	0	0	66	0	0	17	0	0	0	0	0	0	17
e8fa589be4a81c77a7453cac6c57c795	0	0	0	0	0	0	0	0	0	0	0	0	0	0	0	0	0	0	0	0	39	0	0	0	6	0	0	0	0	45	82	0	0	32	0	0	42	0	156	0	0	0	45	0	0	5	3	0	53
8687120f05431279a86b95e7a7fc44a1	23	7	10	33	5	3	16	6	0	103	4	0	3	14	0	0	0	0	0	21	0	12	15	4	17	7	11	13	0	79	0	0	33	5	11	2	55	0	106	0	0	0	0	0	0	0	0	0	0
97df9934e84ceab5ef419433e1e7208b	0	23	0	0	0	0	0	0	0	23	0	0	0	9	0	7	0	0	0	16	0	0	14	0	4	0	13	10	0	41	0	0	0	0	0	0	0	0	0	0	0	0	0	0	0	0	0	0	0
8cdb7431947c5af4f7bc3b97155b3185	0	0	39	0	0	0	23	0	0	62	0	0	73	0	0	69	0	0	0	142	0	0	0	0	0	0	0	95	0	95	0	0	69	23	26	0	0	0	118	0	0	27	0	0	0	0	0	0	27
108028d2de234a608542215759016548	368	0	25	0	0	0	0	0	0	393	0	0	0	0	0	0	0	0	0	0	0	0	0	0	0	0	21	0	0	21	10	0	0	6	0	0	0	0	16	0	0	0	0	0	0	18	0	0	18
7fe443908c3125e9d6614720ef57562b	0	0	0	0	0	0	0	0	0	0	0	0	0	0	0	0	0	0	0	0	14	0	0	0	0	0	0	0	0	14	0	0	99	0	0	19	33	0	151	0	0	0	9	7	0	0	0	0	16
b722dc6559db3b9d5e67d1edeb0efa75	0	0	0	13	0	0	20	0	0	33	29	0	0	13	11	0	20	16	0	89	0	0	28	18	0	0	11	0	0	57	0	18	14	0	17	10	8	0	67	0	0	0	0	0	13	12	0	11	36
3b473fc1dc242f0a312f8964d3655ae3	0	0	0	0	0	0	0	0	0	0	0	0	0	0	0	40	0	0	0	40	0	0	0	0	0	0	0	0	0	0	106	0	0	0	0	0	0	64	170	0	0	0	0	0	0	0	0	0	0
3ff093cb923fc7813d1abbcd8850ccf9	66	0	0	19	0	0	0	0	0	85	0	0	40	0	7	0	0	0	0	47	0	0	0	0	0	0	0	0	0	0	0	29	0	0	29	0	0	0	58	0	16	8	0	0	0	0	0	0	24
0cec6b301b29237ca392dec46f6f110b	63	68	0	0	0	0	0	0	0	131	0	0	0	0	0	0	0	0	0	0	30	0	0	0	0	0	0	23	0	53	0	0	52	0	0	0	0	0	52	0	0	0	28	0	0	0	9	0	37
cce97191b443dee2006a10cf96d046a6	0	0	4	0	0	0	0	0	0	4	0	0	0	0	0	0	0	0	0	0	0	5	0	0	0	0	0	0	0	5	0	0	40	0	0	0	0	0	40	0	0	0	0	0	4	0	2	0	6
31619ec0ce892ade5db08d45a371d3c9	0	0	0	0	0	0	0	0	0	0	0	0	0	0	0	0	0	0	0	0	0	0	0	0	0	0	0	0	0	0	144	0	0	0	0	0	0	0	144	0	0	0	0	0	0	0	0	0	0
b0cfc7b6d89fd6b2ce6edd2ed618fc43	29	53	25	0	0	0	14	0	0	121	5	0	21	0	0	0	0	0	0	26	0	5	26	0	58	0	13	0	0	102	0	0	110	42	38	11	0	4	205	0	0	0	0	0	0	0	0	0	0
3545469ffcfba8140dd3eb313dc2c0d8	0	25	0	26	0	0	0	0	0	51	0	0	0	16	0	0	0	0	0	16	0	0	8	0	39	0	0	0	0	47	0	0	64	0	0	0	0	0	64	0	0	0	0	0	0	0	0	0	0
299b2e62dd1413bc242abe955163c92c	16	67	0	0	0	0	0	0	0	83	0	0	0	0	0	17	0	0	0	17	46	0	92	0	67	0	0	0	0	205	0	0	0	0	0	0	26	0	26	0	0	0	0	0	0	0	0	0	0
e414a4e4dd90804136ab517e225d498d	0	0	16	0	0	27	0	0	0	43	0	0	106	0	0	10	0	0	0	116	0	0	29	22	0	12	18	44	30	155	0	0	0	0	0	0	0	0	0	0	0	0	0	0	8	0	0	0	8
988f6094b28999e94ae08d1fb104adb6	0	0	0	0	18	0	0	0	0	18	0	0	0	0	0	4	0	0	0	4	0	0	0	0	0	0	0	0	0	0	0	0	0	0	10	0	0	0	10	0	0	0	8	0	0	0	0	0	8
ee54c4e91dacec15fbb1f34d9e5df122	0	0	0	23	0	0	0	0	0	23	0	0	0	0	0	15	0	0	0	15	18	0	0	0	0	0	0	0	0	18	0	29	0	25	29	32	32	0	147	0	25	10	18	0	0	0	0	0	53
e1bbb9198f355e080201b32030cb0382	0	0	54	0	0	0	0	0	18	72	0	0	0	0	8	0	0	0	0	8	54	0	0	0	0	0	75	0	0	129	0	0	0	0	0	0	0	0	0	0	0	0	0	0	0	0	0	0	0
94072ab06ed779003c844b8655c3abe2	0	0	0	10	0	13	0	3	0	26	0	0	0	0	0	0	0	0	0	0	74	9	0	42	0	0	0	0	0	125	0	0	52	0	12	0	0	5	69	0	0	0	0	0	0	0	0	0	0
d208dd64307ab7c0b373072640df51aa	0	0	23	0	0	0	0	0	0	23	34	0	0	0	0	0	0	0	0	34	12	0	0	0	0	0	0	20	0	32	0	0	89	22	0	0	0	0	111	0	0	0	0	0	0	0	0	0	0
5c3917e8e1cbfccd8c6399d41871f8d1	0	0	0	0	0	0	0	0	0	0	0	0	0	0	0	0	0	0	0	0	0	0	0	0	0	0	0	0	0	0	0	0	0	0	0	0	0	0	0	0	0	0	0	0	0	0	0	0	0
834673c7a7bf99874e9d68ee17f58bc2	0	0	0	0	0	0	0	0	0	0	0	0	0	0	0	0	0	0	0	0	0	24	47	0	0	46	0	0	17	134	0	0	0	28	0	0	0	0	28	0	23	48	0	0	0	0	0	0	71
3e6fbf413a507b66675fe1e36cb123c6	0	0	0	25	0	0	35	0	0	60	58	0	0	0	0	13	0	14	0	85	0	0	12	19	0	0	19	0	0	50	0	0	14	0	0	18	13	0	45	0	0	0	19	0	0	11	0	0	30
0c293510d3d3d7a7d981bda9cb73643e	50	66	0	0	12	0	0	11	0	139	0	0	0	0	0	0	0	9	0	9	0	0	0	0	40	0	33	20	0	93	19	0	0	53	0	0	0	0	72	0	7	0	0	0	0	0	0	0	7
9c464bb0ef31b189a0f8eea28d8b888f	0	0	0	0	0	0	0	0	0	0	0	0	0	11	0	0	0	0	0	11	13	0	0	0	0	0	0	0	0	13	38	0	0	18	18	0	0	20	94	0	20	16	0	0	0	0	0	0	36
3561b9a37067ce9dda0874415160d35a	0	0	0	0	0	0	0	0	0	0	0	0	0	0	0	9	0	0	0	9	0	0	0	0	0	0	10	0	19	29	0	0	0	0	0	0	0	7	7	0	0	0	0	0	0	0	0	0	0
8a1d4ec0c71e1f068e520d6957e8566a	0	0	0	0	0	0	0	0	0	0	0	0	0	0	0	0	0	0	0	0	0	0	0	0	0	0	0	0	0	0	0	0	0	0	0	0	0	0	0	0	0	0	0	0	0	0	0	0	0
093c5e7e72c208a1b5122e0f57fff92c	0	0	0	0	0	0	0	0	0	0	0	0	0	0	0	0	0	0	0	0	0	0	0	0	0	0	0	0	0	0	0	0	0	32	0	0	0	0	32	0	17	0	0	0	0	0	0	0	17
1266bddafa20237e0e27a878a056b1fc	0	10	3	0	0	5	0	0	0	18	37	0	0	0	0	8	0	0	0	45	26	0	0	5	0	0	0	13	0	44	14	29	0	0	18	0	0	0	61	0	0	3	0	0	0	0	0	0	3
5118d93de6e3162589feef3248af4c9e	0	0	0	0	0	0	0	0	0	0	0	0	0	0	0	0	0	0	0	0	0	0	0	0	36	0	0	0	0	36	0	0	0	15	0	0	0	0	15	0	30	0	22	0	0	0	0	0	52
3458e47c4eb94d8302a809850fa09dd7	0	0	0	0	0	0	0	0	0	0	0	0	0	0	0	0	0	0	0	0	0	0	0	0	0	0	0	0	0	0	0	0	0	0	0	0	0	0	0	0	0	0	0	0	0	0	0	0	0
08c40583a83f77703353112849714295	0	0	0	0	0	0	46	0	0	46	0	0	0	0	0	11	15	0	0	26	0	0	0	0	47	0	0	0	0	47	0	0	66	0	0	0	0	0	66	0	0	0	0	0	0	0	0	0	0
52840c1c2677a99988274095e74a23c6	0	0	0	0	0	0	0	0	0	0	0	0	0	0	0	0	0	0	0	0	0	0	0	0	0	0	0	0	0	0	0	0	0	0	0	0	0	0	0	0	0	0	0	0	0	0	0	0	0
13c83b72257e3f94e242ecb7f17547b8	0	0	0	0	0	0	0	0	0	0	0	0	0	0	0	0	0	0	0	0	0	0	0	0	0	0	0	0	0	0	0	0	0	0	0	0	0	0	0	0	0	0	0	0	0	0	0	0	0
9f6bd3e344181e54bf1dd88c428dfb0f	0	0	0	0	0	0	0	0	0	0	0	0	0	0	0	0	0	0	0	0	0	0	0	0	77	0	0	0	0	77	0	68	0	0	0	0	35	0	103	6	0	0	0	0	0	0	0	0	6
cab693c637469463f5527fac98266e4c	0	0	0	15	32	20	0	0	0	67	0	0	0	0	0	0	0	0	0	0	26	0	0	0	61	0	0	0	0	87	57	0	0	17	0	0	0	0	74	0	0	0	0	0	0	0	0	0	0
49ab58bb802f546107c07cbb2ecfc939	0	0	38	0	0	0	0	0	0	38	0	0	0	0	0	12	0	0	0	12	0	0	0	0	0	0	0	0	0	0	0	144	0	0	0	0	0	9	153	0	0	0	0	0	0	0	0	0	0
fa1481a18bf81ad68a163abd786ebdc8	0	14	28	0	0	15	9	0	34	100	0	0	0	0	0	0	0	0	0	0	0	0	0	7	0	21	0	0	36	64	0	7	0	0	9	10	0	23	49	0	0	0	0	0	0	0	0	0	0
cb34f9fdf7d55df15e824228a4b6ba05	0	0	0	0	0	0	0	0	0	0	0	0	31	0	0	0	0	0	0	31	0	0	0	47	0	93	23	0	79	242	0	0	0	0	0	0	0	0	0	0	0	0	0	0	0	0	0	0	0
4b8267aa623cc256b23457d1674c3916	0	0	0	0	0	0	31	31	0	62	36	0	0	0	0	63	28	0	0	127	0	0	0	0	0	33	0	0	36	69	0	0	0	0	0	33	0	0	33	0	0	0	0	0	0	0	0	27	27
7bc591f121016f813424f3154f61e74d	0	0	0	0	0	0	0	0	0	0	0	0	0	0	0	0	0	0	0	0	0	37	0	0	66	0	0	0	0	103	38	0	0	37	0	0	0	0	75	27	0	0	0	0	0	0	0	0	27
b5639edb3983272dfc78dc90c4c668a2	0	0	0	0	0	0	0	0	0	0	0	0	0	0	0	0	0	0	0	0	0	0	0	0	0	0	0	0	0	0	0	0	0	0	0	0	0	0	0	0	0	0	0	0	0	0	0	0	0
c14102e9853304473356dc3e06269b42	121	38	0	0	0	0	0	0	0	159	149	0	0	0	0	0	0	0	0	149	20	0	0	0	0	0	0	0	0	20	0	0	0	45	0	0	0	28	73	0	0	0	0	0	0	0	0	0	0
2b5ba9301522977159d501e455658137	0	0	0	0	0	0	0	0	0	0	0	0	72	0	0	0	0	0	0	72	0	0	0	0	0	0	0	0	0	0	0	0	0	0	0	0	0	0	0	0	0	0	0	0	0	0	0	0	0
803b88c023844e80a690315e2d51ad17	0	0	0	0	0	0	0	0	0	0	0	0	0	0	0	0	0	0	0	0	0	0	0	0	0	0	0	0	0	0	0	0	0	0	0	0	0	0	0	0	0	0	0	0	0	0	0	0	0
1007ff3aa633c3ce8494a7da9138df3f	0	0	0	0	0	0	0	0	0	0	0	0	0	0	0	0	0	0	0	0	0	0	0	0	0	0	0	0	0	0	0	0	0	0	0	0	0	0	0	0	19	0	25	0	0	0	0	0	44
52dcedbd69bc988715ac5de66e557833	35	0	0	0	0	0	0	0	0	35	0	0	0	0	0	0	0	0	0	0	0	0	0	0	0	0	0	0	0	0	0	0	0	0	0	0	0	7	7	0	0	0	0	0	0	3	0	0	3
22865865ce46b058adc8d410b5d37377	0	0	0	0	0	30	0	0	0	30	0	0	0	0	0	0	0	0	0	0	0	0	0	0	45	0	0	0	0	45	0	0	0	0	0	0	50	0	50	0	0	0	0	0	0	0	0	10	10
d864a9878c6b10d598daa078d52a8af2	0	0	0	15	29	0	0	0	0	44	80	0	0	0	0	0	0	0	0	80	0	0	0	0	0	0	18	22	0	40	0	0	0	0	0	17	0	10	27	0	0	16	0	0	0	0	0	0	16
1efec969cc86b573ad72bdec96ef323b	0	0	0	0	0	0	0	0	0	0	0	0	0	0	0	0	0	0	0	0	0	0	0	0	0	0	0	0	0	0	0	0	0	0	0	0	0	0	0	0	0	0	0	0	0	0	0	0	0
ef1b4a0089370085fdfb633038f3997d	0	33	0	0	0	0	0	0	0	33	0	0	0	0	0	0	0	0	0	0	0	0	0	0	24	0	0	18	0	42	58	0	0	0	0	0	0	0	58	0	0	17	0	0	12	0	0	0	29
ec7d6905b22adeea47a2ebf5881ccbc2	0	0	0	62	0	0	0	0	0	62	0	0	0	0	0	0	54	0	0	54	0	0	0	0	0	0	52	0	0	52	0	0	0	0	0	0	0	0	0	0	0	0	0	0	0	0	0	0	0
2e865e4c46b22e6e65a6f51d41d0dab5	0	0	0	0	0	0	0	0	0	0	0	0	0	0	0	0	0	0	0	0	0	0	0	0	0	0	0	0	0	0	0	0	0	21	0	0	0	0	21	0	0	0	0	0	0	0	0	0	0
6c8b5ed1545840d37193762301d21979	0	26	0	0	0	0	0	0	0	26	48	0	0	0	0	0	0	0	0	48	0	0	0	0	0	0	0	0	0	0	0	50	54	0	0	0	0	0	104	0	0	0	0	0	0	0	0	0	0
0155559bc2cbc36fb9ae02f726fe5e9d	0	0	0	26	0	0	0	0	0	26	0	0	0	0	0	0	0	0	0	0	0	0	0	0	47	0	0	0	0	47	0	51	0	0	0	20	0	0	71	12	29	36	0	0	0	0	0	0	77
7dd03e36d04952205fcd4858d2a830ba	0	0	0	0	0	0	0	0	0	0	0	0	0	10	0	0	0	0	0	10	11	0	0	0	0	0	0	0	0	11	18	0	0	11	11	0	0	6	46	0	22	7	0	0	0	0	0	0	29
914cf3ef9a65fb92321ece07713c4177	0	43	0	0	0	0	0	0	0	43	0	0	63	0	0	0	0	0	0	63	0	19	0	0	42	0	0	0	0	61	110	0	40	0	0	0	0	0	150	0	0	0	0	0	0	0	0	0	0
bd718849c1989babf1d9c98a538f5db7	0	0	0	0	0	0	0	0	0	0	0	0	0	0	0	0	0	0	0	0	0	0	0	0	0	28	0	0	0	28	0	0	0	47	0	0	0	0	47	0	0	0	0	0	0	0	0	0	0
9f911ae883b13dbac236861505b887aa	29	19	0	0	0	0	0	0	0	48	0	0	18	0	0	18	0	0	0	36	0	0	0	0	32	0	0	0	0	32	0	0	0	0	0	0	0	0	0	0	0	0	28	0	0	0	0	0	28
9f95d4577352620253bf5fb015f9278d	0	0	0	0	0	0	0	0	0	0	0	0	0	0	0	0	0	0	0	0	0	0	0	0	0	0	0	0	0	0	0	0	0	67	0	0	0	0	67	0	0	40	0	0	21	0	0	0	61
ffee4dba59207fe47e3fe4a074b44f0e	0	0	0	0	27	0	0	0	0	27	0	0	0	0	0	0	0	24	0	24	0	0	0	0	66	0	27	0	0	93	0	0	0	26	0	0	40	0	66	0	0	0	0	0	0	0	10	0	10
65019319889e754df87d8c98ef65c557	0	0	0	0	0	0	0	0	0	0	0	0	0	0	0	0	0	0	0	0	0	0	0	0	0	0	0	0	0	0	0	0	381	0	0	0	0	0	381	0	0	0	0	0	0	0	0	0	0
27986f28f95c1bad6a175621838365f6	0	0	0	0	0	0	0	0	0	0	0	0	0	0	0	0	0	0	0	0	0	0	0	0	0	0	0	0	0	0	0	0	0	0	0	0	0	0	0	0	0	0	0	0	0	0	0	0	0
f10e1777957f83920e160f9daf4bf51b	0	16	0	0	0	0	0	0	0	16	0	0	0	0	0	0	0	0	0	0	0	0	0	0	17	0	0	0	0	17	0	58	38	0	0	10	0	0	106	0	0	16	0	0	11	0	0	0	27
6c588c792e459a73dc38121443b669d8	0	0	0	0	0	0	0	0	0	0	57	0	0	0	0	0	0	6	0	63	0	0	0	0	0	0	0	0	0	0	0	0	0	0	36	0	0	0	36	0	0	0	8	0	0	0	0	0	8
9b7a53b8195af49a3df4f8de529feeb2	0	0	0	0	0	0	0	0	0	0	0	0	0	27	0	0	0	0	0	27	0	4	0	0	69	0	0	0	0	73	0	69	0	0	0	0	0	0	69	0	0	0	0	0	0	0	0	0	0
aeebca9ec1bf76241e54957f8995bb9e	62	0	0	0	0	0	0	0	0	62	0	0	0	0	0	0	0	0	0	0	0	0	0	0	0	46	0	0	0	46	0	0	0	0	0	47	0	0	47	0	0	0	0	0	0	0	0	0	0
4904f52a55f671ccf027b6141932e43d	0	0	0	0	27	0	26	0	0	53	0	0	0	0	0	0	0	0	0	0	0	0	0	0	0	0	0	0	0	0	0	0	233	14	20	8	31	0	306	0	0	0	0	0	0	0	0	0	0
816aac2412a72e052e30a24b13ee933c	30	0	0	0	0	0	7	9	0	46	55	2	0	0	0	0	0	9	0	66	22	0	0	0	24	0	0	35	0	81	17	14	30	0	0	0	0	0	61	0	0	0	0	0	0	0	0	0	0
a7853f4ed56ebcc11d31e6f75c0f7ba0	0	0	0	0	0	0	0	0	7	7	0	0	9	11	0	0	0	0	0	20	11	0	14	0	0	0	0	0	0	25	15	0	0	17	0	0	0	6	38	9	11	0	0	0	0	0	0	0	20
cadebcb5f083335cffaf8b5c5b0de270	0	0	0	0	0	0	0	0	0	0	0	0	0	0	0	0	0	0	0	0	0	0	0	0	0	0	0	0	0	0	0	0	0	0	0	0	0	0	0	0	0	0	0	0	0	0	0	0	0
8498d5ef203568a55e4d6ec94cd48487	0	0	0	0	0	11	0	0	0	11	0	0	0	0	0	22	0	0	0	22	0	0	72	0	0	0	0	0	12	84	0	48	0	0	22	0	0	0	70	0	0	0	0	0	0	0	0	0	0
4c664b5b6302018163dcb0e816559727	0	0	0	0	0	0	0	0	0	0	0	0	0	0	0	0	0	0	0	0	0	0	0	0	0	0	0	0	0	0	0	0	0	0	0	0	0	0	0	0	0	0	0	0	0	0	0	0	0
dd003ea31d7d9b1f57c0270042363d6b	0	0	0	0	0	0	0	0	0	0	66	0	0	0	0	0	0	0	0	66	0	0	0	0	0	11	0	0	11	22	0	0	141	0	0	0	0	0	141	0	0	0	0	0	0	0	0	0	0
cd911499ddfc4cfd5442a17d1168aacc	0	61	0	0	0	0	0	0	0	61	0	0	0	0	0	0	0	0	0	0	0	77	0	0	0	0	0	0	0	77	40	0	0	0	0	0	0	0	40	0	0	0	0	0	0	0	0	0	0
92fcc7daf092b92d60692dc6f1f65834	9	0	0	0	0	0	0	0	0	9	0	0	0	0	0	0	0	0	0	0	0	0	0	0	0	0	0	105	0	105	0	0	0	0	0	0	0	0	0	0	0	0	0	0	0	0	0	0	0
dea9fe5c78360e46aebf79ec241b7f24	0	0	0	0	0	0	0	78	0	78	0	0	0	0	0	55	0	0	0	55	0	0	0	0	0	0	55	0	0	55	0	0	0	0	0	68	0	0	68	0	0	0	0	0	0	0	0	0	0
0548447e0595be3ea658cef67b16d83f	0	0	0	26	0	0	42	0	0	68	57	0	0	0	0	0	18	34	0	109	17	0	0	0	0	18	19	0	0	54	0	0	0	0	31	16	0	0	47	0	0	0	0	19	0	0	0	0	19
7654f3b4d49d890847c34613a9e1fb16	0	37	0	0	0	0	56	52	0	145	0	0	0	0	0	0	40	0	0	40	0	0	0	0	0	0	0	0	41	41	0	0	0	0	0	44	0	0	44	0	0	0	0	0	0	0	0	0	0
abf16ecdff8e503a786441d220c63802	0	0	0	0	0	0	0	0	0	0	0	0	0	0	0	0	0	0	0	0	0	0	0	0	0	0	0	0	0	0	0	0	0	0	0	0	0	0	0	0	0	0	0	0	0	0	0	0	0
60b917669e72b5dc1f5db764606162e6	0	0	0	0	0	0	0	0	0	0	0	0	0	0	0	0	0	0	0	0	42	0	42	0	0	28	0	0	0	112	18	0	0	0	23	0	0	0	41	0	40	0	0	0	0	0	0	0	40
28654e219227848e9d61ea1892886868	0	0	0	0	0	0	0	0	0	0	0	0	5	0	0	0	0	0	0	5	0	3	0	0	0	0	0	0	0	3	0	0	0	0	0	0	0	0	0	0	0	10	0	0	12	0	0	0	22
44f5fcdcd040c2a0483ae7670d4f7946	0	0	0	0	0	4	0	0	0	4	0	0	51	0	0	0	0	0	0	51	0	0	0	0	27	0	15	0	0	42	0	20	0	0	0	0	0	0	20	0	0	0	0	0	0	23	0	0	23
71d7b85b81680aebca50e04b1f614026	0	0	0	0	0	0	0	0	0	0	0	0	0	16	0	0	0	0	0	16	0	0	0	0	0	0	0	0	0	0	30	0	123	28	0	0	0	0	181	0	0	0	0	0	0	0	0	0	0
35735bfa805fb50a0efc9f75b3a6b736	0	0	0	0	0	0	0	0	0	0	0	0	0	0	0	0	0	3	0	3	0	0	0	0	0	0	0	0	0	0	0	0	0	0	0	0	0	0	0	0	23	43	0	0	0	0	0	0	66
bb8e6cd763a428c82f3137964e5452c8	0	0	0	36	0	0	0	0	9	45	0	0	0	0	0	0	35	0	0	35	0	0	0	0	0	0	25	0	0	25	0	0	0	0	0	0	0	0	0	0	0	0	0	0	0	0	0	0	0
e473e3a6cdb85c5429d4e37552f721f9	0	0	21	0	0	0	0	4	0	25	0	0	56	0	0	0	0	0	0	56	0	0	36	0	0	0	0	0	0	36	0	30	0	0	0	0	0	0	30	0	0	0	0	0	27	0	0	0	27
3afe4672ba5bd084b058599170ac81eb	0	0	17	0	0	0	0	0	0	17	0	0	0	0	0	0	0	0	0	0	0	0	0	0	0	0	0	0	0	0	0	0	64	0	10	0	0	0	74	0	0	0	0	0	0	0	0	0	0
3e38647962b8d78697835d3887f7d9a6	0	0	16	34	0	0	0	0	0	50	0	5	0	0	0	25	0	0	0	30	0	0	0	0	0	0	0	85	0	85	0	0	89	4	0	0	0	0	93	0	0	0	0	0	0	0	0	0	0
52488609d3f9a399faa03f1c8b3560aa	0	0	0	0	0	0	0	0	0	0	0	0	0	0	0	0	0	0	0	0	0	0	0	0	0	0	0	0	0	0	0	0	0	0	0	0	0	0	0	0	105	0	0	0	0	0	0	0	105
ec4a61cf4cc790615f21728c0eca147f	0	0	0	0	0	0	0	0	0	0	0	0	0	0	0	0	0	0	0	0	14	0	27	0	0	0	0	0	0	41	0	0	128	4	17	21	0	0	170	0	14	6	0	0	0	0	0	0	20
fc90203271e06afca4255012aa687490	0	0	0	0	0	0	0	0	0	0	39	0	0	4	0	0	0	0	0	43	41	0	0	0	0	0	5	0	0	46	20	24	0	0	0	0	0	0	44	0	10	0	0	0	0	0	0	0	10
f8c73a0f7b0577e07d4c8897a22b8dc7	0	0	0	8	0	0	0	0	0	8	25	0	0	0	0	0	0	0	0	25	13	0	0	0	0	0	0	47	0	60	27	0	0	19	0	0	16	0	62	0	0	0	0	0	0	0	0	0	0
0f26d558c9e4deeb960505ed6d460f2c	28	0	0	0	6	0	0	0	0	34	0	0	17	0	0	0	0	0	0	17	0	16	0	0	6	0	0	0	0	22	46	0	0	0	0	0	0	0	46	0	0	0	0	4	0	0	0	0	4
9f6af0b15aea781e07876b31d1e74bdd	0	0	0	0	0	0	0	0	0	0	0	0	0	0	6	0	0	0	0	6	0	0	0	0	113	0	0	0	0	113	103	0	0	0	0	0	0	0	103	0	0	0	0	0	16	0	0	0	16
0670c45853ce7c499cebd8720f0a4642	0	14	0	0	12	8	22	26	0	82	0	0	13	0	8	45	9	0	0	75	0	0	0	0	0	0	23	0	24	47	0	0	14	0	0	17	0	0	31	0	0	0	0	0	0	0	0	0	0
83afc078a778bc0bc232796dd7ebdf40	0	0	0	0	0	0	0	0	0	0	0	0	0	0	0	0	0	0	0	0	0	0	0	0	0	0	0	0	0	0	0	0	0	0	0	0	0	0	0	0	0	0	0	0	0	0	0	0	0
471864a6d429d38873d581622e76f00e	0	0	0	0	0	0	0	0	2	2	0	0	0	0	0	0	0	0	0	0	0	0	44	0	0	30	0	0	8	82	0	93	0	0	42	0	0	43	178	0	0	0	0	0	0	0	0	0	0
f4d956e2f505c210a854be6046bd2647	0	0	0	11	0	0	0	0	0	11	0	0	0	0	0	0	0	0	0	0	0	0	0	0	0	0	0	0	0	0	0	18	0	0	0	28	26	0	72	0	24	10	18	0	0	0	0	12	64
ab72f5aba4e60f0d9c7c165d57a46ee5	0	0	31	0	37	0	6	0	0	74	38	0	0	14	0	18	0	0	0	70	47	0	0	20	0	0	0	31	0	98	0	0	0	0	0	0	0	0	0	0	0	0	0	0	0	0	0	0	0
8aa1b8418fe991953b80b64d4c7bbef0	87	0	0	16	26	0	0	0	0	129	0	0	0	0	0	0	0	0	0	0	0	0	0	0	106	0	0	0	0	106	8	0	0	21	0	0	0	0	29	0	0	0	0	0	0	0	0	0	0
e67846dc3c6082ac31e90f230c40ea64	23	21	0	0	0	0	0	0	0	44	0	0	13	0	0	24	0	0	0	37	7	0	0	21	15	0	0	17	0	60	0	0	0	0	0	0	6	0	6	0	0	0	16	7	0	0	0	0	23
e31969f0d95d5518e8b27c1a06a3766a	0	0	0	77	0	0	0	0	17	94	0	0	0	0	0	59	0	0	0	59	0	0	0	0	0	0	0	0	0	0	0	0	0	0	0	0	0	0	0	0	0	0	0	0	0	0	0	0	0
384997af792c9a4fd56346546dd09080	0	0	0	0	0	0	0	0	0	0	0	0	0	0	0	0	0	0	0	0	0	0	0	0	0	0	0	0	0	0	0	0	0	0	0	0	0	0	0	0	0	0	0	0	0	0	0	0	0
a114dec580226214804cd029fb8fe880	0	0	0	16	0	0	0	0	0	16	0	0	0	0	0	0	5	0	0	5	0	0	0	0	0	0	12	0	0	12	5	0	0	0	0	3	0	0	8	0	0	0	0	0	0	0	0	0	0
2fd7444af9a888b904ba8aa72bbc9db2	0	0	0	0	0	0	0	0	8	8	0	0	7	7	0	0	0	0	0	14	6	0	10	0	0	0	0	0	0	16	16	0	0	13	0	0	0	6	35	10	11	0	0	0	0	0	0	0	21
d53ff25d6eb3ed218b6f2073915f6baf	20	0	0	0	11	0	0	0	0	31	0	0	0	0	0	0	0	0	0	0	0	0	0	0	0	0	0	0	0	0	0	0	0	0	0	0	0	0	0	0	0	0	0	0	0	0	0	0	0
6885512a96666075b2a1fa21d37fcafe	0	0	0	0	0	0	0	0	0	0	0	0	0	0	0	0	0	0	0	0	0	0	0	0	0	0	0	0	0	0	0	0	0	0	0	0	0	0	0	0	0	0	0	0	0	0	0	0	0
fa6b12e74e1ff144782c79172f50a530	0	0	0	6	0	0	5	0	10	21	0	0	0	0	6	7	0	0	0	13	11	0	0	12	0	37	0	16	0	76	0	0	0	0	16	0	15	0	31	0	5	9	0	17	0	0	10	0	41
13dab6f522e7c71f7b57d115772c5ad9	15	28	0	0	33	0	0	0	0	76	0	0	0	0	17	0	0	0	0	17	0	0	0	0	0	0	16	28	0	44	19	0	41	0	0	0	23	0	83	0	0	0	0	0	0	0	0	0	0
c84d5b7ebd8977e241c2aa6b195c1fd0	0	0	0	20	0	0	0	0	0	20	0	0	0	0	0	0	0	0	0	0	0	0	42	0	0	0	0	0	0	42	0	0	83	27	0	0	10	0	120	0	0	0	0	0	0	0	0	0	0
db94dbb8659215e831eb98e2afdf2ccd	0	0	0	0	0	0	34	5	0	39	106	0	5	0	0	0	0	0	0	111	0	0	6	11	0	0	0	0	0	17	0	0	0	0	0	0	0	0	0	0	0	0	0	0	0	0	0	0	0
54c46d92d777985e2bb8170b317870d9	0	0	0	0	0	0	0	0	0	0	0	0	0	0	0	0	0	0	0	0	0	0	0	0	0	0	0	0	0	0	0	0	0	0	0	0	0	0	0	0	0	0	0	0	0	0	0	0	0
ce2b913942473870cf696e1bde906f6a	0	0	0	0	0	0	0	0	0	0	0	0	0	0	0	0	0	0	0	0	0	0	0	0	0	0	0	26	0	26	0	0	0	0	14	0	0	0	14	0	9	0	0	0	0	0	0	0	9
b87faa5a443dbeb4a3492b51b4ccb621	0	0	0	0	0	0	0	0	0	0	0	0	0	0	0	0	0	0	0	0	0	0	0	0	0	0	0	0	0	0	0	0	0	0	0	0	0	0	0	0	0	0	0	0	0	0	0	0	0
2e6cf18ec96455e3813108400aaea3a8	0	0	0	0	54	0	56	81	0	191	0	0	0	0	0	0	0	0	0	0	0	0	0	0	0	0	0	0	0	0	0	0	0	0	0	0	0	0	0	0	0	0	0	0	0	0	0	0	0
6aab38bda69b338f1ea14872af592313	28	29	0	0	0	0	0	0	0	57	22	0	0	0	0	0	0	0	0	22	18	0	0	0	40	0	0	17	7	82	0	0	78	22	19	0	25	0	144	0	0	0	0	0	0	0	0	0	0
bea637b0ddf3d35a5a159dea5717173b	61	0	8	0	0	0	0	0	0	69	48	0	0	0	0	12	0	0	0	60	0	0	0	33	0	0	20	0	0	53	0	0	0	52	0	26	14	16	108	0	0	0	0	0	0	0	0	0	0
7eee40e6ac01780376e913d3e1557694	0	0	0	0	26	0	0	0	0	26	0	0	0	0	17	12	0	8	0	37	0	0	0	0	27	0	0	35	0	62	0	0	0	0	0	0	0	0	0	0	0	0	14	0	0	0	0	0	14
e871be681cb26c7eb2a6bf8adfd0cb89	16	24	0	0	0	0	0	0	0	40	41	0	0	0	0	0	0	0	0	41	0	0	0	0	0	0	0	0	0	0	0	0	40	0	0	0	0	0	40	10	0	0	0	0	0	0	0	0	10
191261f60d2530cd3b679cbe9abdfe0b	10	0	0	0	0	0	0	0	0	10	0	0	0	0	18	0	0	0	0	18	0	0	0	0	0	0	0	0	0	0	0	28	0	0	0	0	0	0	28	0	0	0	22	0	0	0	0	0	22
4bf4ac1d2c7c925d530b86b0e1f5a4bb	58	0	0	54	0	0	0	0	0	112	0	0	0	0	0	0	16	0	0	16	22	0	0	0	0	0	0	0	0	22	0	0	0	0	0	0	92	0	92	0	0	0	0	0	0	0	0	0	0
79ead2945dcad292d55252a9d3333a83	34	0	0	0	37	0	0	0	0	71	0	0	15	0	0	0	13	0	0	28	0	0	0	24	32	0	0	0	0	56	0	0	0	0	0	0	0	0	0	0	10	0	0	0	0	0	0	0	10
237067e1828e7787d5caa5cb15c37000	0	0	0	0	0	0	0	0	0	0	0	0	0	0	0	0	0	0	0	0	0	0	0	0	0	0	10	0	0	10	45	0	0	0	0	0	0	0	45	0	0	0	0	0	0	0	0	0	0
6530b6e58d47d50a1b39a4d8679cb9c3	0	0	0	10	0	22	0	0	0	32	0	0	0	0	0	0	6	0	0	6	0	0	0	0	5	10	15	0	0	30	0	0	0	32	28	0	0	30	90	13	0	0	0	0	0	0	0	0	13
c9bdc4d88db1553b6e1f76242d3149f8	0	0	0	0	0	0	28	0	0	28	0	0	0	0	0	0	0	0	0	0	0	0	0	0	38	0	11	0	0	49	0	0	31	0	0	0	0	0	31	0	0	0	0	0	0	0	0	0	0
88af51150f7cf665dc39d9e9d304ba8e	0	0	0	0	0	0	0	0	0	0	0	0	0	0	12	0	0	0	0	12	0	0	0	0	0	0	0	0	0	0	0	0	242	0	0	0	0	0	242	0	0	0	0	0	0	0	0	0	0
dad3364dffe9bb341502e751ecf773b7	0	0	0	0	0	0	0	0	0	0	0	0	0	0	0	0	0	0	0	0	0	0	0	0	0	0	0	0	0	0	0	0	0	0	0	0	0	0	0	0	0	0	0	0	0	0	0	0	0
121a8aaefe6b2f013eb86ca979c4ff4c	0	0	0	0	0	0	0	0	0	0	0	0	0	0	0	0	0	0	0	0	45	0	0	0	0	0	0	0	0	45	0	0	0	0	0	0	0	0	0	22	41	0	0	0	0	0	0	0	63
ba15556f0fab937c0f01b6602f2ffb80	0	58	0	0	14	0	0	0	0	72	0	0	0	0	0	0	0	0	0	0	0	0	0	0	43	0	0	42	0	85	0	0	0	43	0	18	22	0	83	0	0	0	0	0	0	0	0	0	0
f52e262ae9f1a59561e30204db845101	0	0	19	0	0	0	0	0	0	19	111	0	17	0	0	0	0	0	0	128	0	5	0	0	0	0	0	0	0	5	0	0	55	0	16	0	0	0	71	0	0	0	0	0	0	0	0	0	0
e76d4e144b3180512b8f9242419ffdc6	0	0	0	0	0	0	0	0	0	0	0	0	0	0	33	29	0	0	0	62	0	0	0	0	0	0	0	0	0	0	24	0	0	0	0	0	92	19	135	0	0	0	0	0	0	0	0	0	0
7228aec6c28205ca0b9a39193dde6554	0	0	0	0	0	0	0	0	0	0	0	0	0	0	0	0	0	0	0	0	0	3	0	0	0	27	0	0	0	30	39	0	0	27	7	0	35	5	113	0	0	0	0	0	0	4	0	0	4
9fdfec29134347364c82b21fb0cdefb0	0	0	17	0	0	0	0	0	0	17	0	0	0	0	0	0	0	0	0	0	0	0	0	0	0	0	0	0	0	0	58	31	0	0	17	0	0	9	115	0	17	0	0	0	0	0	0	0	17
7588bbda46d13242d9a2ac512fd1d38f	0	0	25	0	0	0	0	0	0	25	0	0	9	0	0	0	0	0	0	9	0	0	0	0	0	0	0	0	0	0	0	0	0	0	0	0	0	0	0	0	0	0	0	0	5	0	0	0	5
7978532d21ffe78cc702abbcb80e7cd8	0	0	0	0	0	0	0	0	0	0	0	0	0	0	0	0	0	0	0	0	0	0	0	0	0	0	0	0	0	0	0	0	0	0	0	0	0	0	0	0	0	0	0	0	0	0	0	0	0
2c7637e1e2da66561a7e460f4b58f598	0	0	0	67	9	0	0	0	0	76	0	0	0	0	0	0	0	0	0	0	0	0	0	4	40	0	0	0	0	44	0	0	0	0	0	0	0	0	0	0	0	0	0	0	0	0	0	0	0
296f7568d05dbfc794c1455e77c48261	0	0	0	0	0	0	0	0	0	0	0	0	0	0	0	0	0	0	0	0	0	0	0	0	161	0	0	0	0	161	0	0	0	0	0	0	0	0	0	0	0	0	0	0	0	0	0	0	0
9786e4679b50d167bf7853bc87f551e5	0	0	30	9	0	0	0	0	0	39	0	0	0	0	0	0	0	0	0	0	49	9	0	0	75	0	0	0	0	133	0	0	0	21	0	12	0	0	33	0	0	0	0	0	0	0	0	0	0
9b5cfafb82f0a98b5bab0a9513af8718	0	0	7	0	0	10	0	0	0	17	0	0	0	0	0	0	0	0	0	0	18	9	0	14	0	0	0	0	0	41	0	0	0	7	64	0	0	0	71	0	0	0	0	0	0	0	0	0	0
806fe04702731fd68540be1192b2a5d0	0	0	0	0	0	0	0	0	0	0	0	0	0	0	0	0	0	0	0	0	0	0	51	0	51	0	0	0	0	102	72	0	0	48	0	0	0	0	120	0	0	0	0	0	0	0	0	0	0
1b1ca00845299e4b4a653bf8dadc8a8b	0	37	0	0	0	24	0	0	0	61	0	0	9	0	0	0	0	0	0	9	21	0	0	8	0	0	0	23	0	52	0	0	0	0	0	32	39	0	71	0	0	0	0	0	0	0	0	0	0
39cb3466f9954c4d9140bfcfe4a33c01	0	0	0	0	0	12	0	0	0	12	0	0	0	0	0	0	0	0	0	0	0	0	0	0	0	53	0	0	27	80	0	0	0	0	0	0	0	0	0	0	0	3	0	0	0	0	0	0	3
304b09db2a36b940c594913c3a15cd06	0	0	0	0	0	0	0	0	0	0	0	0	0	0	0	0	0	0	0	0	0	0	0	0	0	0	0	45	0	45	0	0	0	0	0	0	0	0	0	0	0	74	0	0	0	0	0	0	74
d10941c7fd187f8915d25fdb67397c69	0	0	0	0	10	0	0	0	0	10	0	0	0	0	0	0	0	0	0	0	0	0	0	0	0	7	0	60	0	67	12	22	0	0	0	0	0	17	51	0	0	0	0	0	0	0	0	0	0
054e6ba1a60edccc2ad205f22b81e2cb	0	0	0	0	0	0	0	0	0	0	0	0	0	12	0	0	0	0	0	12	31	0	0	0	0	0	0	0	0	31	0	73	0	0	23	0	0	0	96	0	0	0	0	0	0	0	0	0	0
853dd39636feb75acca2bf06bd36ba5e	186	0	0	0	0	0	0	0	0	186	0	0	0	0	0	0	0	0	0	0	0	0	10	0	0	0	0	38	0	48	0	0	0	0	0	0	0	0	0	0	0	0	0	0	0	0	0	0	0
fefb5cc70064aba82ab5d7fcb32d3048	0	0	0	0	0	0	0	0	0	0	0	0	0	0	0	0	0	0	0	0	0	0	0	0	0	0	0	0	0	0	0	0	0	0	0	0	0	0	0	0	0	0	0	0	0	0	0	0	0
4b336f1957cb2f3d9438fdbedbb06c6a	0	0	0	0	0	18	0	0	0	18	0	0	0	0	0	0	0	0	0	0	0	0	0	0	0	0	0	0	0	0	0	0	0	0	0	0	0	0	0	0	0	0	0	0	0	0	0	0	0
ab9eefb6f9e0aaec882d8262cfeb75b5	0	0	0	0	0	0	0	0	0	0	255	0	0	0	0	0	0	4	0	259	0	0	0	0	0	0	0	0	0	0	0	0	0	0	0	0	0	0	0	0	0	0	0	0	0	0	0	0	0
5737e69a364f3c811533981398c97133	50	0	18	0	0	0	14	0	0	82	0	0	9	14	0	8	0	0	0	31	10	0	8	7	10	7	0	26	0	68	0	0	44	43	0	0	0	0	87	0	0	0	0	0	0	0	0	0	0
b4b43722935d718ccd878ff8e56a2921	0	0	0	0	0	0	0	0	0	0	0	0	0	0	0	0	0	0	0	0	0	0	268	0	0	0	0	0	0	268	0	0	0	0	0	0	0	0	0	0	0	0	0	0	0	0	0	0	0
c14cda37fec55b5e1ee95e6e0b3567f8	0	0	0	0	0	0	0	7	0	7	0	0	12	13	0	0	0	0	0	25	0	0	0	0	0	0	30	0	0	30	0	0	0	0	0	0	0	0	0	0	0	0	0	0	0	0	0	0	0
2e7322adb34663e71a3a8ae9d2e20874	0	0	0	0	0	0	0	0	0	0	0	0	0	0	0	0	0	0	0	0	0	12	0	0	0	0	0	0	0	12	0	0	0	0	27	0	0	0	27	0	0	0	0	0	0	0	0	0	0
585911b5b7f33d3c2796ea34242cb443	0	0	0	0	0	0	0	0	0	0	0	0	18	0	0	0	0	0	0	18	0	0	0	0	74	0	0	0	0	74	0	0	0	0	0	0	60	0	60	0	0	0	0	0	0	0	0	0	0
d542a77ba4283477b70a8cd976cc3c74	0	0	0	26	0	0	0	21	0	47	0	0	0	26	0	0	0	0	0	26	0	0	0	0	0	0	27	38	0	65	9	0	0	0	0	0	0	0	9	0	0	0	0	0	0	0	0	0	0
308f243a7b27c66d9c333fe661529c8e	0	37	0	0	0	9	0	0	0	46	0	0	0	0	0	0	0	0	0	0	33	0	0	0	0	14	0	0	0	47	0	0	0	0	0	0	0	0	0	0	0	0	0	0	0	0	0	0	0
cb0f33c776d7b3f3a41243f2e06b7c91	0	0	0	0	0	0	0	0	21	21	0	0	0	0	0	0	0	0	0	0	0	0	0	0	0	4	15	0	16	35	0	0	0	0	16	0	0	0	16	0	0	0	0	0	0	0	4	0	4
9016b08c6e017b362df03cb4c63d23f8	67	0	0	0	0	0	0	0	0	67	0	0	0	0	0	0	0	0	0	0	0	0	0	0	0	0	0	0	28	28	0	24	0	0	0	0	0	0	24	0	0	0	0	0	0	0	0	0	0
aecb1f50c3c0bd8d879f1dbfe29345dc	0	0	0	0	0	0	0	0	0	0	0	0	0	0	0	0	0	0	0	0	0	0	0	0	2	0	0	0	0	2	0	0	0	0	0	0	0	0	0	0	8	0	0	0	5	0	0	0	13
d41173a4de7580468a89a61bc89a916e	0	0	0	0	17	0	0	0	0	17	0	0	0	0	0	0	0	0	0	0	22	0	0	0	0	0	0	0	0	22	0	32	0	0	0	0	0	0	32	21	22	9	0	0	0	0	0	0	52
d8e34d32bcd9aca46a8faa1fd941c3cd	0	0	0	0	0	0	0	0	0	0	0	0	0	0	0	0	0	0	0	0	0	0	0	0	0	0	0	0	0	0	16	0	33	0	21	0	0	0	70	0	0	0	0	0	0	0	0	0	0
2c3c118ad9e94e2e6022cba6351628c7	0	0	0	0	0	0	0	0	0	0	0	0	0	0	0	0	0	4	0	4	0	0	0	0	0	0	0	0	0	0	0	0	0	0	0	0	0	0	0	0	0	0	0	0	16	0	0	0	16
47a672427011fbb0eacabb7dac996f92	7	3	0	0	0	0	0	0	0	10	0	0	4	0	0	0	13	0	0	17	1	0	0	0	5	0	0	7	0	13	0	0	11	3	0	0	24	0	38	0	0	0	21	0	0	0	0	0	21
34bab623dbd5bdad5ab4725ff37aa22f	0	0	0	0	0	0	0	0	0	0	23	0	26	0	0	0	0	0	0	49	25	0	0	0	0	0	0	0	0	25	43	0	0	0	0	0	0	0	43	0	27	24	0	0	0	0	0	0	51
671e6e19b0c85d56304cbbac04042efb	0	0	0	0	0	0	0	0	0	0	0	0	0	32	66	0	0	0	0	98	0	0	0	0	0	0	0	0	0	0	0	0	0	0	0	0	0	0	0	0	0	0	72	75	0	0	0	0	147
5ab14cabcac98887a5a7e0f371e1a065	65	0	0	0	4	0	0	0	0	69	0	0	0	8	0	0	14	0	0	22	0	0	0	0	0	0	0	0	0	0	0	0	75	49	0	17	13	0	154	0	0	0	0	0	0	0	0	0	0
f39e1105b807a6e87ba87a12d2c2d7b9	0	0	0	8	0	0	0	0	0	8	0	0	0	0	0	0	0	0	0	0	0	0	0	0	0	0	0	0	0	0	0	0	0	0	0	0	0	0	0	0	0	0	0	0	0	0	0	0	0
95d6c855ff6b0756eca14982aeeb44a6	0	0	0	0	0	0	0	0	0	0	0	0	0	0	0	0	0	0	0	0	0	0	0	0	0	0	0	0	0	0	0	0	0	0	0	0	0	0	0	13	0	0	0	0	0	0	0	0	13
9d8990819a2dbcb78777ab948274fb7e	92	0	0	45	0	0	0	0	0	137	0	0	0	0	0	0	0	0	0	0	0	0	0	43	0	0	0	0	0	43	0	0	0	0	0	0	0	0	0	0	0	15	0	0	0	0	0	0	15
d417210d7da0a677b9bff5d16ee02ca7	0	0	0	0	0	0	0	0	0	0	0	0	15	0	0	0	0	0	0	15	0	0	0	0	0	0	0	0	0	0	0	0	0	0	0	64	0	0	64	0	0	0	0	11	10	0	0	0	21
d0a45699fb1aa24e0ab316f35fd71f77	5	12	0	0	0	0	0	0	0	17	0	0	0	0	0	7	0	0	0	7	0	5	0	0	0	0	0	0	0	5	0	0	0	2	8	0	41	0	51	0	0	0	0	0	0	0	0	0	0
6899fbcf7c4ff804452cf23814161ec8	0	0	0	0	0	0	0	0	0	0	0	0	0	0	0	0	0	0	0	0	0	0	0	0	0	0	0	0	0	0	0	0	0	0	0	0	0	0	0	0	0	0	0	0	0	240	0	0	240
631840e265cdc82de262ef71288e63d9	0	0	0	0	0	0	0	0	0	0	0	0	0	0	0	0	0	0	0	0	0	0	0	13	27	0	0	0	0	40	45	0	0	0	0	0	0	0	45	0	0	0	0	8	0	0	0	0	8
d6e4a4b10d100d7e76b2abb23b73e823	33	0	0	0	0	0	0	0	0	33	0	0	0	62	61	0	0	0	0	123	0	0	0	0	0	0	0	0	0	0	0	0	0	0	0	0	0	0	0	0	0	0	0	0	0	0	0	0	0
5c05fc98dcfdda283cf09d0dfad32db5	0	0	0	7	28	0	0	0	0	35	105	0	0	7	0	0	0	0	0	112	0	9	45	0	0	0	0	0	0	54	0	0	0	0	0	0	0	0	0	0	0	0	0	0	0	0	0	0	0
e75ef20124fa8cca36a3b48852a188f6	0	0	0	0	0	0	0	0	0	0	0	0	0	0	0	0	0	0	0	0	0	0	0	0	0	0	0	0	0	0	0	0	0	0	0	0	0	0	0	0	0	0	0	0	0	0	0	0	0
73ce2971575bcac7c95a2b1d7022513a	0	0	0	0	0	0	0	0	0	0	106	0	22	0	0	0	16	0	0	144	0	0	0	0	0	0	0	0	0	0	0	0	73	0	0	19	0	0	92	0	0	0	0	0	0	0	0	0	0
c050fac9eedc4b081f46b3e4f6cb24ff	0	0	0	0	0	0	0	0	0	0	97	0	0	0	0	0	0	0	0	97	0	0	21	0	56	0	0	0	0	77	28	0	0	0	0	0	0	0	28	0	0	0	0	0	0	0	0	0	0
28d3ec840cdd9dfb5e6b1a2dd90e5148	0	0	0	0	0	0	0	0	0	0	199	0	24	0	0	0	0	0	0	223	0	0	0	0	0	0	0	0	0	0	0	0	0	0	0	0	0	0	0	0	0	0	0	0	0	0	0	0	0
4ac5d2fa035444f9487705c2992ce189	0	0	0	0	0	0	0	0	0	0	0	0	17	0	0	16	0	0	0	33	48	0	0	0	0	0	24	0	0	72	0	0	0	50	0	0	0	2	52	0	0	0	0	0	0	0	0	0	0
eb69cdae9688387d497b02ca3c7d57e3	0	0	0	0	0	0	0	0	0	0	0	0	0	0	0	0	0	9	0	9	0	0	0	0	0	0	0	0	0	0	0	0	0	65	0	0	0	0	65	0	0	0	0	0	0	0	0	0	0
3182e7e73ef01a6be67debcf3cfb7ce0	0	0	0	0	0	0	0	0	0	0	0	0	0	19	34	0	0	16	0	69	0	0	0	10	0	0	0	0	0	10	0	0	0	0	0	9	8	0	17	0	0	0	0	0	0	0	10	0	10
f43afe1d5189f34a042247058f561840	0	0	0	25	0	0	0	0	0	25	0	0	0	0	0	21	0	55	0	76	0	0	0	0	0	0	0	0	0	0	0	0	0	0	0	0	0	0	0	0	0	0	0	0	0	0	0	0	0
14e060e4e3558e421aa78fb383c0bd40	0	0	0	0	0	0	0	0	48	48	0	0	53	0	0	0	0	0	0	53	0	0	0	0	0	0	0	0	25	25	0	0	0	0	0	0	0	0	0	0	0	0	0	13	0	0	0	0	13
2ddfc3e8a5fdf8120a16efeed8cd8c0c	0	0	10	0	0	0	0	0	0	10	0	0	37	0	0	0	0	0	0	37	0	0	0	0	0	0	0	0	0	0	0	0	0	33	0	0	0	0	33	0	0	0	0	0	0	0	0	0	0
cf4a63359720b17f0d69f02a1b061b64	0	0	0	0	0	0	0	0	0	0	0	0	0	0	0	0	0	0	0	0	0	0	0	0	0	0	0	0	0	0	0	0	0	0	0	0	0	0	0	0	0	0	0	0	0	0	0	0	0
d33dbe04c73dd602ad22b64711077362	0	0	0	0	0	0	0	0	0	0	0	0	0	0	0	0	0	0	0	0	0	0	0	0	0	0	0	0	0	0	0	0	0	0	0	0	0	0	0	0	0	0	0	0	0	0	0	0	0
60b48ace5ce2ca148a096e976fd6373d	175	0	0	0	0	0	0	0	0	175	0	0	0	0	0	0	0	0	0	0	0	0	0	0	0	0	0	0	0	0	0	0	0	0	0	0	0	0	0	0	0	0	0	0	0	0	0	0	0
9c78ab80bc898331cd65a5fbb9241507	0	0	0	0	0	0	0	0	0	0	0	0	0	0	0	0	0	0	0	0	0	0	0	0	0	0	0	0	0	0	0	0	0	0	0	0	0	0	0	0	15	0	36	24	0	0	0	0	75
889749465f0d4b4e3629fd53ce497506	0	0	0	0	0	0	0	0	0	0	0	0	0	0	0	0	0	0	0	0	0	0	0	0	0	0	0	0	0	0	0	0	0	0	0	0	0	0	0	0	38	0	0	0	0	0	0	0	38
ac00fe9632318bef30b00ae3a34b412f	0	0	0	0	0	0	62	0	0	62	0	0	0	0	0	0	0	0	0	0	0	0	0	0	0	0	0	0	0	0	0	0	0	0	0	0	0	0	0	0	0	0	0	0	0	0	0	0	0
999228e72a916f22437fec3dae476b4b	0	0	0	0	0	0	0	0	0	0	0	0	0	0	0	0	0	0	0	0	0	0	0	0	0	0	0	0	0	0	0	0	0	0	0	0	0	55	55	0	0	0	0	0	0	0	0	0	0
77e915ed495a35619f9c2d9de00efefd	9	0	0	0	0	0	0	0	0	9	0	0	0	0	0	6	0	0	0	6	0	13	0	0	0	0	0	0	0	13	155	0	0	0	16	0	0	0	171	0	0	0	0	0	0	0	0	0	0
9a0b11e84953e67c7acfa14839fdb386	0	0	0	0	0	0	0	0	0	0	0	0	0	0	0	0	0	0	0	0	0	0	0	0	0	0	0	0	0	0	0	0	0	0	0	0	0	0	0	0	0	0	0	0	0	0	0	0	0
1e2919eb184770bceb1fb6ab7d6c0b9e	0	0	0	0	0	0	0	0	0	0	0	0	0	0	0	11	0	0	0	11	0	0	0	0	0	0	0	0	0	0	0	0	0	39	0	0	0	26	65	0	0	0	0	0	0	7	0	7	14
470a61469a5913d819d199f2f6e1007c	0	0	0	0	0	0	0	0	0	0	0	0	0	0	0	0	0	0	0	0	0	0	0	0	0	0	0	0	0	0	0	0	0	0	0	0	0	0	0	0	15	0	44	0	0	0	0	0	59
90ed6bb025550437e2634812df6b1857	0	0	0	0	0	0	0	38	0	38	0	0	0	0	0	32	0	0	0	32	0	0	20	0	0	0	0	0	0	20	0	0	0	0	0	35	0	0	35	0	0	0	0	0	0	0	0	23	23
455235060d52a7637844e8ef77285238	0	0	0	0	0	0	0	0	0	0	0	0	0	0	0	0	0	0	0	0	0	0	0	0	0	0	0	0	0	0	0	0	0	222	0	0	0	0	222	0	0	0	0	0	0	0	0	0	0
69ac18477d30ecd10f5ba5a54e46489e	0	0	0	0	0	0	20	0	0	20	0	0	0	0	0	0	0	0	0	0	0	0	0	36	0	0	0	0	0	36	0	0	0	37	0	0	0	0	37	0	0	0	0	0	0	0	0	0	0
141bf3e1826e25d3f85df4f4d3c1e780	0	0	0	0	0	0	0	0	0	0	0	0	0	0	0	0	0	0	0	0	0	0	30	0	0	0	0	0	0	30	0	38	0	0	0	0	0	0	38	0	0	0	0	0	0	0	0	0	0
953b5e2f58a46933e632327891716682	0	0	0	0	0	0	0	0	29	29	0	0	0	0	0	0	0	0	0	0	0	31	0	0	0	13	0	23	37	104	0	0	0	0	0	0	0	51	51	0	0	0	0	0	0	0	0	0	0
96d84edc8dcaa74a3ad27dc806c45a05	0	0	0	0	0	0	0	0	0	0	0	0	0	0	0	0	0	0	0	0	60	0	0	0	34	0	0	0	0	94	0	0	0	36	0	0	0	0	36	0	0	0	0	0	0	0	0	0	0
2397d72affa07c60ec19e8aa288514f7	0	0	0	0	0	0	0	0	0	0	0	0	0	0	0	0	0	0	0	0	0	0	0	0	0	0	0	0	0	0	0	0	0	0	0	0	0	0	0	0	0	0	0	0	0	0	0	0	0
1e3daadfc9448682be521eeb3a80f61b	7	8	0	0	0	0	0	0	0	15	0	0	13	0	0	15	0	0	0	28	0	0	0	0	10	0	0	0	0	10	0	0	0	0	0	0	0	0	0	0	0	0	13	0	0	0	0	0	13
3f7f3ccb60b03a51ffe229ce4e3ff8db	28	0	0	0	24	0	0	0	0	52	0	0	0	0	0	0	0	0	0	0	47	16	0	0	0	0	0	0	0	63	0	0	0	0	0	0	0	0	0	0	0	0	0	0	0	0	0	0	0
027660c97d107c2613475bf3c374635f	0	0	0	0	0	0	0	0	0	0	0	0	0	0	0	0	0	0	0	0	0	0	0	0	0	0	0	0	0	0	0	0	0	0	0	17	0	0	17	0	0	0	0	0	0	0	0	0	0
3bc2902ac63e81aeae95d893994faec4	0	0	0	0	31	0	0	0	0	31	48	0	0	0	0	0	0	0	0	48	0	0	0	0	0	0	0	0	0	0	49	0	0	0	0	0	0	0	49	0	0	41	0	0	0	0	0	0	41
cf2d671123ec87d2907ba2a5d4c3cdb3	0	0	0	0	8	0	0	0	0	8	68	6	0	0	0	0	0	0	0	74	0	0	0	0	22	0	0	0	0	22	0	0	61	0	0	0	25	0	86	0	0	0	0	0	0	0	0	0	0
293d640e4803c12a7f477813ac65d881	0	0	16	0	0	28	0	0	0	44	0	0	0	0	0	0	0	0	0	0	0	0	0	0	0	0	0	0	0	0	0	0	0	0	0	14	0	7	21	0	0	0	0	0	0	0	0	0	0
eba08b4c5d2dfbd7d819fcb9a03aabae	0	0	0	0	0	0	0	0	0	0	46	0	0	0	0	0	0	0	0	46	0	0	0	0	0	0	0	0	0	0	0	0	78	0	0	0	0	0	78	0	0	0	0	0	0	0	0	0	0
cf2418b436406d98147b59ca8baf58a7	0	0	23	0	0	0	15	0	18	56	0	0	0	0	0	0	0	0	0	0	0	0	0	7	0	15	0	0	28	50	0	0	0	0	6	15	0	0	21	0	0	0	0	0	0	0	0	0	0
3e2fe34abfd6f5f144467e227bc14e5b	0	0	0	0	0	0	36	0	0	36	0	0	0	0	0	0	0	0	0	0	0	0	0	0	0	0	0	0	0	0	0	0	0	0	0	43	0	0	43	0	0	0	0	0	0	0	0	0	0
49d157059d14113cc662966924ee2c0f	0	0	0	36	0	0	0	0	8	44	0	0	0	0	0	25	0	0	0	25	0	0	0	0	0	0	0	0	0	0	0	0	0	0	0	0	0	0	0	0	0	0	0	0	0	0	0	0	0
689af89963ab94970a67a62209d456e0	0	0	21	0	0	0	0	0	0	21	0	0	0	0	0	96	0	0	0	96	0	0	0	0	0	0	0	0	0	0	0	0	0	0	0	0	0	0	0	0	0	0	0	0	0	0	0	0	0
bcfa208a42508c39cdb7c4b965d6f179	0	0	0	0	0	32	0	0	0	32	0	0	0	0	0	0	0	0	0	0	0	0	0	0	0	0	0	0	0	0	0	0	0	0	0	52	0	0	52	0	0	0	0	0	32	0	0	0	32
a106fd4e98f0bc1d0ce489502291312a	0	11	0	0	0	15	22	0	0	48	0	0	0	0	0	0	0	0	0	0	0	0	0	0	0	22	0	0	0	22	0	0	0	0	0	0	15	0	15	0	0	0	0	0	7	0	0	16	23
953f9d2074d6958d9f75206c217fd09a	0	0	0	0	0	0	0	0	0	0	0	0	0	0	0	0	0	0	0	0	0	0	0	0	0	0	0	57	0	57	0	0	0	0	0	0	0	0	0	0	0	0	0	0	0	0	0	0	0
a8043c5302c218098c017ff228a6879c	0	0	0	0	0	0	0	0	0	0	0	0	0	0	0	0	0	0	0	0	0	0	0	0	0	0	0	0	0	0	20	0	63	0	0	0	0	0	83	0	19	0	0	0	0	0	0	0	19
fc1ce602e6cf86ddd5d37f587b5ba79f	0	0	0	0	0	0	0	6	0	6	0	0	0	0	0	0	0	0	0	0	0	0	0	0	0	0	0	0	66	66	0	0	0	0	0	0	0	0	0	0	0	0	0	0	9	0	6	0	15
b3c8bae6cb2d7dd0675a354e5811d3f9	0	0	0	0	0	0	0	0	0	0	0	0	0	0	0	0	0	0	0	0	0	0	0	0	0	0	0	0	0	0	0	0	0	0	0	0	0	0	0	0	0	0	0	0	0	0	0	0	0
568eff915a7ca023b7d2f5cc2f66b0ac	0	0	0	0	0	0	0	0	0	0	0	0	0	0	0	0	0	0	0	0	7	0	0	0	0	0	0	18	0	25	0	0	0	0	0	0	0	0	0	0	0	0	0	0	0	0	0	0	0
e13a305714c783af7043bb88464b8167	0	0	0	0	19	0	0	0	0	19	0	0	0	0	0	0	0	0	0	0	0	0	0	0	0	0	0	0	0	0	0	0	0	0	0	0	0	0	0	0	0	0	0	0	0	0	0	0	0
67747a6b2dffa26a79024159e0aa60b4	0	0	0	0	0	0	0	0	0	0	0	0	0	0	0	13	0	0	0	13	0	6	0	0	55	0	0	0	0	61	0	23	28	0	0	0	0	0	51	0	0	0	0	0	0	0	0	0	0
c4f564b0f2c4ff4741687a51cb4230f4	0	0	31	42	0	0	0	0	0	73	0	0	0	0	8	0	9	0	0	17	26	0	0	0	0	0	0	0	0	26	0	0	0	0	0	0	0	0	0	0	0	0	0	0	0	0	0	0	0
fb97bf3402c4dc907c33d63869207657	0	0	0	0	0	0	0	0	0	0	156	0	0	0	0	0	0	0	0	156	0	0	0	0	0	0	0	0	0	0	0	0	40	0	0	0	0	0	40	0	0	0	0	0	0	0	0	0	0
d43bd060c42a6ab3e7beffcdacae163e	0	0	0	0	0	0	0	0	0	0	0	0	0	0	0	0	0	0	0	0	0	0	0	0	77	0	0	0	0	77	0	0	0	0	0	0	0	0	0	0	0	0	0	0	0	0	0	0	0
fae8d3aed8fb2a7c62f30fc771553131	0	0	0	0	0	0	0	0	0	0	0	0	0	0	0	0	0	0	0	0	0	0	51	0	0	0	0	0	0	51	0	0	144	0	0	0	0	0	144	0	0	0	0	0	0	0	0	0	0
4549d4e856c4dbd13af102e2f917a287	0	0	0	0	0	0	0	0	0	0	193	0	0	0	0	0	0	0	0	193	0	0	0	0	0	0	0	0	0	0	0	0	0	0	0	0	0	0	0	0	0	0	0	0	0	0	0	0	0
cd654b398366c5ef70a4f8c59ad1c546	25	19	0	0	0	6	0	0	0	50	0	0	0	0	0	13	0	0	0	13	0	0	0	0	22	0	0	12	0	34	0	0	44	23	0	0	0	0	67	0	0	0	0	0	0	0	0	0	0
3c2ca5dbca29aec576eef537f455a1c7	0	0	0	0	0	0	0	0	0	0	0	0	0	0	0	0	0	0	0	0	0	0	0	0	0	7	0	0	0	7	0	40	0	0	0	0	0	0	40	0	0	18	0	0	0	0	0	0	18
6c28aa04e142ad0b89836af4ba433fb4	50	0	0	0	0	0	0	0	0	50	0	0	0	0	0	0	0	0	0	0	0	0	0	0	48	0	0	0	0	48	0	0	0	0	0	0	0	0	0	0	9	0	0	0	0	0	0	0	9
0b9d589998884353017ebb422b14edf0	0	0	0	0	0	0	0	0	0	0	0	0	0	0	0	0	0	0	0	0	0	0	0	0	0	0	0	0	0	0	0	0	0	0	0	0	0	0	0	0	0	0	0	0	0	0	0	0	0
c3b38a18bd982a267f0722b7826b6fe4	0	0	0	0	0	0	0	0	0	0	0	0	0	0	0	0	0	0	0	0	0	0	0	0	0	63	0	0	0	63	0	0	0	0	0	35	0	0	35	0	0	0	0	37	0	0	0	0	37
8078fc70c761c2a9b2ac2aae6f4a15c9	0	0	0	18	0	0	33	0	0	51	0	0	0	0	0	0	32	44	0	76	0	0	0	0	0	12	0	0	0	12	0	0	0	0	0	0	0	0	0	0	0	0	0	0	0	0	0	0	0
b783949c53a9e6671c4e4cf5a098632e	0	0	0	0	0	0	0	0	0	0	0	0	0	0	0	0	0	0	0	0	0	0	0	0	0	23	0	0	0	23	0	0	0	0	0	0	0	0	0	0	0	0	0	0	0	0	0	10	10
f43602fbd51e926d221e20baca2819d5	0	0	0	0	0	0	0	0	0	0	0	0	0	0	0	0	0	0	0	0	0	0	0	0	0	0	0	0	0	0	0	0	0	52	0	0	0	0	52	0	0	0	0	0	0	0	0	0	0
50467d2997281e80c8496c110edc712d	0	0	0	0	0	0	0	0	0	0	0	0	0	0	0	0	0	0	0	0	0	0	0	0	0	0	0	0	0	0	0	0	0	0	0	0	0	0	0	0	0	0	0	0	0	0	0	0	0
2a4a1f2a60dfeaacf70d5d08e874bb99	70	0	0	0	0	0	0	0	0	70	0	0	0	0	0	0	0	0	0	0	0	0	0	0	0	0	0	0	0	0	0	0	0	0	0	0	0	0	0	0	33	0	0	8	0	0	0	0	41
4d71ae6d43fa534c71c6ca88517faa02	0	0	0	28	31	0	0	0	0	59	0	0	0	26	34	0	0	0	0	60	0	0	0	20	0	0	0	0	0	20	0	0	0	17	0	0	0	0	17	0	0	0	0	0	0	0	0	0	0
d7b6735ef581d97badeb9e83d55f0f51	0	0	0	0	0	0	0	0	0	0	0	0	0	0	0	0	0	0	0	0	0	0	0	0	0	0	0	0	0	0	0	0	61	0	0	0	0	0	61	4	0	0	0	0	0	0	0	0	4
3eb9169e7c86a4f3e1c2835383677d02	0	0	0	0	0	0	0	0	0	0	26	0	0	0	0	0	0	3	0	29	0	0	6	0	0	0	0	0	0	6	0	0	0	0	0	0	0	0	0	0	0	0	0	0	5	0	0	0	5
a6e20789b399ac36e04370a935508765	0	0	0	0	0	0	0	0	0	0	0	0	0	0	0	9	0	0	0	9	0	0	0	0	0	0	0	0	0	0	0	0	0	18	0	0	0	19	37	0	0	0	0	0	0	12	0	9	21
c780260d3ee5bf08a216581aa8ad6f83	0	0	0	0	0	0	0	0	0	0	0	0	0	0	0	0	0	0	0	0	0	0	15	0	0	0	0	16	0	31	0	0	0	0	0	0	0	0	0	0	30	0	0	0	0	0	0	0	30
d1677be129f0d44ba39e1e2ac2046e47	0	0	0	0	0	0	0	0	0	0	0	0	0	0	0	0	0	0	0	0	0	17	0	0	0	0	6	0	0	23	15	0	0	0	0	32	0	0	47	0	0	0	0	0	0	0	0	0	0
b97396516afe7c7863d59abeeb646e05	0	0	0	0	0	0	0	0	0	0	0	0	0	0	0	0	19	0	0	19	0	0	34	0	0	0	0	0	0	34	0	0	133	0	0	0	0	0	133	0	0	0	0	0	0	0	0	0	0
e196728a78bba864427c6b43b52a5cd4	0	0	0	0	0	0	0	0	0	0	0	0	0	0	0	0	0	0	0	0	0	0	0	0	0	0	0	0	0	0	0	75	0	0	0	0	0	0	75	0	0	0	0	0	0	0	0	0	0
0ba43b3f322f3373e4918954adcfee31	0	21	0	0	0	0	12	0	0	33	0	0	0	0	0	0	13	0	0	13	0	0	0	0	0	0	0	0	0	0	13	0	0	27	0	0	0	0	40	0	0	0	0	0	0	0	0	0	0
6ed4448eceb6ee3e75e8f164e7ad3b25	0	0	0	0	0	0	0	6	0	6	0	0	0	0	0	0	0	0	0	0	0	0	2	0	0	13	0	0	12	27	0	0	0	0	0	0	0	43	43	0	0	0	0	0	0	0	0	0	0
ebc4dc210da7cfd1da86d1bba5f2ff8b	0	0	0	44	0	0	0	0	0	44	0	0	0	0	0	0	0	0	0	0	0	0	0	0	0	0	0	0	0	0	0	0	0	0	0	0	63	0	63	0	0	0	0	0	0	0	0	0	0
07b7b5bce5a194d99af0098a5cee2fde	51	0	0	0	0	0	0	0	0	51	0	0	0	0	0	0	0	0	0	0	0	0	0	0	0	0	31	0	0	31	33	0	0	0	28	0	0	0	61	0	0	0	0	0	0	0	0	0	0
5749621a4dd3e649fa045ad9c53a92bd	0	0	0	0	0	0	0	0	0	0	29	0	0	0	0	0	0	0	0	29	0	0	0	0	38	0	0	0	0	38	0	0	0	0	0	13	38	0	51	0	0	0	0	0	0	0	0	0	0
53f3cfd9b917c2cb80488cb0eddb6808	0	0	0	0	0	22	0	0	0	22	0	0	11	0	0	0	0	0	0	11	0	0	0	0	0	0	0	0	0	0	0	74	0	0	0	9	0	0	83	0	0	0	0	0	0	0	0	0	0
5c39e85500733b25d88d153920e0a170	0	0	0	0	0	0	0	0	0	0	0	0	0	0	0	0	0	0	0	0	0	0	15	0	0	0	0	24	0	39	0	0	0	0	0	0	0	0	0	0	31	0	0	0	0	0	0	0	31
d3fe3955f59edf8d7c5a4326b332d96a	8	0	0	0	0	0	0	0	0	8	0	0	0	0	0	0	0	0	0	0	0	0	0	0	0	0	0	0	0	0	0	0	0	0	0	0	0	0	0	0	0	0	0	0	32	0	0	0	32
2a1c2ecbe025a7d71b238816dcbdf636	0	0	0	0	0	0	0	0	0	0	0	0	0	0	0	0	0	0	0	0	0	0	0	0	0	0	0	0	0	0	0	0	0	27	0	0	0	0	27	0	0	0	0	0	0	0	0	0	0
c5c461281c9890e6062e63fe35903b66	0	0	0	0	0	0	0	0	0	0	0	0	0	0	0	0	0	0	0	0	0	0	0	0	0	0	0	0	0	0	0	0	0	0	0	0	0	0	0	0	0	0	0	0	0	0	0	0	0
71057ef9dbe6da787cbdb4ffac39c547	0	0	0	0	0	0	0	0	0	0	0	0	0	0	0	0	0	0	0	0	0	0	0	0	0	0	0	0	0	0	0	0	0	0	0	0	0	0	0	0	0	0	0	0	0	0	0	0	0
951d496441afacf641108a40053be449	0	0	0	0	0	0	0	0	0	0	0	0	0	0	0	0	0	0	0	0	0	0	0	0	0	0	0	0	0	0	0	0	0	0	0	0	0	0	0	0	0	0	0	0	0	0	0	0	0
6860b3e4804deda477e9ee10a77b4b4a	0	0	0	0	0	0	0	0	0	0	0	0	0	0	0	0	0	0	0	0	0	0	0	0	0	0	0	0	0	0	0	0	0	0	0	0	0	23	23	0	0	0	0	0	0	0	0	0	0
4e1528951be8933a11159235994b386a	0	0	37	0	0	0	0	0	0	37	0	0	0	0	0	43	0	0	0	43	0	0	0	0	0	0	0	0	0	0	0	0	0	0	0	0	0	0	0	0	0	0	0	0	0	0	0	0	0
cd82f2089aa7d8d80c8b42b032998c42	0	0	0	0	0	0	0	0	0	0	0	0	0	0	0	0	0	0	0	0	0	0	0	0	21	0	38	0	0	59	0	0	0	0	0	0	0	0	0	0	0	0	0	0	0	0	0	25	25
e524570f7f2881f4cf9b96b4e9412638	0	0	0	0	0	0	0	0	0	0	0	0	0	5	0	0	0	0	0	5	0	0	0	0	0	0	0	0	0	0	0	43	0	0	26	0	0	0	69	0	0	0	0	0	50	0	0	17	67
988598e856197850f1dc45df763170d2	175	0	0	0	0	0	0	0	0	175	0	0	0	0	0	0	0	0	0	0	0	0	0	0	0	0	0	0	0	0	0	0	0	0	0	0	0	0	0	0	0	0	0	0	0	0	0	0	0
c3be0f67b3e1fcedfeeb4935268a449e	0	0	0	0	0	0	0	0	0	0	0	0	0	0	0	0	0	0	0	0	0	0	0	0	0	0	0	0	0	0	0	0	0	0	0	0	0	0	0	0	0	0	0	0	0	0	0	0	0
f09d17995a1b1afe8f1a1ecc480f4e15	0	0	0	0	0	0	0	0	0	0	0	0	0	0	0	0	0	0	0	0	0	0	0	0	0	0	0	0	0	0	0	0	174	0	0	0	0	0	174	0	0	0	0	0	0	0	0	0	0
903834a7d4a9c479a2b0c6d451a723b1	0	0	0	0	0	0	0	0	0	0	0	0	0	0	0	0	0	0	0	0	0	0	0	0	0	0	0	0	0	0	0	0	0	0	0	0	0	0	0	0	0	0	0	0	0	0	0	0	0
a493b057731f36bc3d39b8263ae7b7b1	0	0	0	0	0	0	0	0	0	0	0	0	0	0	0	0	0	0	0	0	0	0	0	0	0	0	0	0	0	0	0	0	0	0	0	0	0	0	0	0	0	8	0	0	0	0	0	0	8
9ae632f312e1b2374e4acae64e9584bc	0	96	0	0	0	0	0	0	0	96	0	3	0	0	0	0	0	0	0	3	0	0	0	0	0	0	0	0	0	0	0	7	0	0	0	0	26	0	33	0	0	0	0	0	0	0	0	0	0
8884d038e4ec59c8d6994f0287cf5128	0	12	0	0	17	0	0	27	0	56	0	0	0	0	0	13	0	22	0	35	0	0	0	0	0	0	0	0	11	11	0	0	0	0	0	14	0	0	14	0	0	0	0	0	0	0	0	0	0
1590cb7fa8545afdb4f5ac1f3d5e5eb4	0	0	0	0	0	0	0	0	0	0	0	0	0	0	0	0	0	0	0	0	0	0	0	0	0	0	0	0	0	0	0	0	0	0	0	0	0	0	0	0	0	0	0	0	0	0	0	0	0
7809dd25545bfd628a619a96893e0b4c	0	0	17	0	10	0	0	0	0	27	0	0	0	0	0	0	0	0	0	0	0	0	0	0	0	0	30	0	0	30	0	0	0	0	0	0	0	0	0	0	0	0	0	0	0	0	0	0	0
1b1a14aad0b4047dc8d30cbf8416f7d6	0	0	0	0	0	0	0	0	0	0	0	0	0	0	0	0	0	0	0	0	34	0	0	0	0	0	0	0	0	34	0	34	0	0	11	0	0	16	61	0	0	0	0	0	0	0	0	0	0
4cce510ec8a5ccb65b0c5f2f6109626b	0	0	0	0	0	0	0	0	0	0	36	0	0	0	0	0	0	0	0	36	11	0	0	0	0	0	0	0	0	11	0	0	0	0	0	0	0	0	0	0	25	0	0	0	0	0	0	0	25
2e81fef889158e2fe9a4d3be4dd3a355	0	0	0	0	0	0	0	0	60	60	0	0	0	0	0	0	0	0	0	0	0	0	0	0	0	41	0	0	39	80	0	0	0	0	0	0	0	0	0	0	0	0	0	0	0	0	18	0	18
70491b964ed19b597a269bc83762469a	0	50	45	0	0	0	0	0	0	95	0	0	0	0	0	22	0	16	0	38	27	0	0	0	0	0	0	0	0	27	0	0	0	0	0	0	0	0	0	0	0	0	0	0	0	0	0	0	0
7ac44f4b72cfb0a33f1b346cde4b1207	0	8	0	0	0	0	0	0	0	8	0	0	0	0	0	20	0	0	0	20	0	0	0	29	0	0	0	0	0	29	0	0	0	19	0	0	0	0	19	0	0	0	0	0	0	0	0	0	0
f43ae0340f126612da2f9dfebeb535bf	0	0	0	0	0	0	0	0	0	0	0	0	0	0	0	0	14	0	0	14	0	0	0	0	0	0	0	0	0	0	0	0	48	10	0	0	4	0	62	0	0	0	0	0	0	0	0	0	0
fdad95a2623ef33a8750bb33d0638bed	0	0	0	0	0	0	0	0	0	0	0	0	0	0	0	0	0	0	0	0	0	0	0	0	0	0	0	0	0	0	0	32	0	23	0	0	0	0	55	0	0	0	0	0	0	0	0	0	0
b29d98302ca38b718da2e014e1950121	0	0	0	0	0	0	0	0	0	0	0	0	0	0	0	0	0	0	0	0	0	6	0	0	0	0	0	0	0	6	0	0	0	0	0	0	0	0	0	0	0	0	0	0	0	0	0	0	0
2bacb0c3fd580500e38d4692105a9535	0	12	0	0	0	0	14	0	0	26	38	0	15	0	0	0	0	0	0	53	0	0	26	0	21	0	0	0	0	47	0	32	0	0	0	0	0	0	32	0	0	0	0	0	0	0	0	0	0
ce3b66d0fa575ec80cea04b9a03fe1f9	0	0	0	0	0	0	0	0	0	0	49	0	22	0	0	0	0	0	0	71	0	0	0	0	0	0	0	0	0	0	0	0	0	0	0	0	0	0	0	0	0	0	0	0	0	0	0	0	0
2b5fa20aaa021cbd0e0f2b167eb2c6a7	0	0	0	0	0	0	0	0	29	29	0	0	0	0	0	0	0	0	0	0	0	0	0	0	0	0	0	0	70	70	0	0	27	0	0	0	0	0	27	0	0	0	0	0	18	0	0	0	18
492f9f1951788af409dc91af7507549d	0	0	0	0	0	0	0	0	0	0	0	0	0	0	0	0	0	0	0	0	0	0	0	0	0	0	0	0	0	0	0	0	0	0	0	0	0	0	0	0	0	0	0	0	0	0	0	0	0
9f2a50c173e2157a993db805bd0f5b8e	0	0	0	0	7	0	45	0	0	52	0	0	0	0	0	0	0	0	0	0	0	0	0	0	0	0	0	0	0	0	0	0	0	0	0	0	0	0	0	0	0	0	0	0	0	0	0	0	0
dabbb08773fba4b0b7465bb92d380224	0	0	21	0	0	0	0	0	0	21	0	0	34	0	0	0	0	0	0	34	0	0	0	0	0	0	0	0	0	0	0	0	0	0	0	0	0	0	0	0	0	14	0	0	0	0	0	0	14
0a240cbceb630ae46183748dd1b7f5e0	0	0	0	0	0	0	0	0	0	0	0	0	0	0	0	10	0	0	0	10	0	0	8	0	0	0	0	13	0	21	22	0	0	16	0	0	0	0	38	0	15	0	0	0	0	0	0	0	15
ec2e8b6cc695f3809d0818242addfd9d	0	44	0	0	0	0	0	6	0	50	0	0	0	0	0	0	0	0	0	0	0	0	0	0	0	0	8	0	0	8	0	0	0	21	0	15	0	0	36	0	3	0	0	0	0	0	0	0	3
f3721a34d0e968e5142040c1e2126715	97	41	0	0	0	0	0	0	0	138	0	0	0	0	0	0	0	0	0	0	0	0	0	0	0	0	0	0	0	0	0	0	0	0	0	0	0	0	0	0	0	0	0	0	0	0	0	0	0
24208d7af8659cff1c9bead17a245989	0	0	0	0	0	0	0	0	0	0	0	0	0	0	0	0	0	0	0	0	0	0	0	26	0	0	0	0	0	26	0	0	0	0	0	0	0	0	0	0	19	0	0	0	0	0	0	0	19
87617f3eb97e8c3cae07a7710009d4f4	0	0	0	0	0	0	0	0	0	0	0	0	0	0	0	0	0	0	0	0	0	0	0	0	0	0	0	0	0	0	0	31	0	0	0	0	0	0	31	0	0	0	0	0	0	0	0	0	0
30aa726c8eee3c229d0f29a9444062bd	0	0	0	0	0	0	0	0	0	0	68	0	0	0	0	0	0	0	0	68	0	0	0	0	0	0	0	0	0	0	0	0	0	0	0	0	0	0	0	77	0	0	0	0	0	0	0	0	77
528b53da1ac3e858810a4143ddc5c915	0	0	0	0	0	0	0	0	0	0	0	0	0	0	0	0	0	0	0	0	0	0	0	0	0	19	0	0	0	19	0	0	0	0	0	0	0	0	0	0	0	0	0	0	0	8	0	16	24
9a6dc52543070b36be2595a3317db49b	0	0	0	0	11	0	0	0	0	11	0	0	6	0	6	0	0	6	0	18	0	0	0	0	0	0	0	0	0	0	0	0	0	0	0	0	0	0	0	0	0	6	0	0	0	0	0	0	6
4e441c97fd25e15a9e5c67fd7c9dacd0	0	0	0	0	0	0	0	0	0	0	0	0	0	0	0	0	0	0	0	0	0	0	0	0	0	0	0	0	0	0	0	0	0	0	0	0	0	0	0	0	0	0	0	0	0	0	0	0	0
c0d3c05349a4d4bdd418156f16779dea	0	25	0	7	0	0	0	0	0	32	0	0	0	0	0	0	0	0	0	0	0	0	0	44	0	0	0	0	0	44	0	0	0	0	0	0	0	0	0	0	0	21	0	0	0	0	0	0	21
53be6c96b00bd686b5ae129d349fc4c8	0	0	0	0	0	0	0	0	0	0	0	0	0	0	0	0	0	0	0	0	0	0	0	0	0	0	0	0	0	0	0	0	0	0	0	0	0	0	0	0	0	0	0	0	0	0	0	0	0
[truncated: 3,209 more rows]
[truncated: 30 more columns]
