# Supplementary material for: Multi-omics characterisation of Daphnia magna exposed to PFAS and microplastics: transcriptome and gut microbiome datasets
Source: Research Square preprint supplement (doi:10.21203/rs.3.rs-7840812/v1), 2025-11-13
Supplement: Supplementary file 3 [file f9278ed844db3d0ef1e8117f.xlsx]

## Sheet: LRV0_1
Genotype	LRV0_1
Day	Day1			Day 2			Day 3				Day1		Day2		Day 3				Day 1			Day 2			Day3				Day1			Day2		Day3				Day1		Day2			Day3				Day1
Replica	R1	R2	R3	R1	R2	R3	R1	R2	R3		R1	R2	R1	R2	R1	R2	R3		R1	R2	R3	R1	R2	R3	R1	R2	R3		R1	R2	R3	R1	R2	R1	R2	R3		R1	R2	R1	R2	R3	R1	R2	R3		R1	R2	R3
Treatment	LRV0_1_Control_R1D1	LRV0_1_Control_R2D1	LRV0_1_Control_R3D1	LRV0_1_Control_R1D2	LRV0_1_Control_R2D2	LRV0_1_Control_R3D2	LRV0_1_Control_R1D3	LRV0_1_Control_R2D3	LRV0_1_Control_R3D3	total	LRV0_1_PET-PFOA_R1D1	LRV0_1_PET-PFOA_R2D1	LRV0_1_PET-PFOA_R1D2	LRV0_1_PET-PFOA_R2D2	LRV0_1_PET-PFOA_R1D3	LRV0_1_PET-PFOA_R2D3	LRV0_1_PET-PFOA_R3D3	total	LRV0_1_PET-PFOA-PFOS_R1D1	LRV0_1_PET-PFOA-PFOS_R2D1	LRV0_1_PET-PFOA-PFOS_R3D1	LRV0_1_PET-PFOA-PFOS_R1D2	LRV0_1_PET-PFOA-PFOS_R2D2	LRV0_1_PET-PFOA-PFOS_R3D2	LRV0_1_PET-PFOA-PFOS_R1D3	LRV0_1_PET-PFOA-PFOS_R2D3	LRV0_1_PET-PFOA-PFOS_R3D3	total	LRV0_1_PET_R1D1	LRV0_1_PET_R2D1	LRV0_1_PET_R3D1	LRV0_1_PET_R1D2	LRV0_1_PET_R2D2	LRV0_1_PET_R1D3	LRV0_1_PET_R2D3	LRV0_1_PET_R3D3	total	LRV0_1_PET-PFOS_R1D1	LRV0_1_PET-PFOS_R2D1	LRV0_1_PET-PFOS_R1D2	LRV0_1_PET-PFOS_R2D2	LRV0_1_PET-PFOS_R3D2	LRV0_1_PET-PFOS_R1D3	LRV0_1_PET-PFOS_R2D3	LRV0_1_PET-PFOS_R3D3	total	LRV0_1_PFOA_R1D1	LRV0_1_PFOA_R2D1	LRV0_1_PFOA_R3D1
LOC116915296	715	564	197	72	133	294	448	828	362	3613	22	26	895	195	851	145	1129	3263	50	152	22	294	99	194	421	74	167	1473	51	653	253	209	489	470	907	46	3078	63	181	312	722	63	740	1347	486	3914	57	48	337
LOC116915298	5	3	4	0	0	3	1	3	3	22	1	1	2	0	3	1	4	12	0	8	0	0	0	0	0	0	0	8	1	8	5	2	9	3	9	0	37	1	2	0	4	2	3	2	1	15	0	2	4
LOC116915299	18	2	0	0	2	0	3	0	0	25	4	1	0	2	0	0	1	8	0	1	1	1	0	0	0	0	0	3	1	1	0	0	1	1	0	0	4	0	2	1	1	0	2	4	1	11	0	0	9
LOC116915300	188	126	101	15	56	66	270	194	112	1128	17	6	163	35	216	37	283	757	8	40	18	55	13	47	96	4	26	307	30	120	79	65	75	113	377	1	860	28	129	78	148	10	287	444	74	1198	18	23	159
LOC116915308	916	499	278	41	308	209	377	407	149	3184	35	41	536	57	230	32	773	1704	47	170	36	169	38	168	58	7	28	721	95	410	249	108	263	146	726	16	2013	133	345	290	633	35	256	978	100	2770	81	33	635
LOC116915310	967	675	41	469	822	750	1545	1659	1443	8371	25	44	2573	1035	2935	606	3700	10918	291	219	29	1441	282	679	1277	414	1498	6130	63	1307	394	1025	1585	1893	2346	617	9230	31	285	1335	1193	350	2129	3212	1904	10439	13	208	222
LOC116915312	0	2	3	0	0	2	5	2	0	14	0	0	0	2	0	2	2	6	0	0	0	1	0	0	1	0	0	2	0	0	1	1	0	4	3	0	9	0	0	0	0	0	6	2	0	8	0	0	2
LOC116915322	252	55	73	11	39	144	363	309	122	1368	20	7	107	31	156	9	293	623	21	36	29	20	13	21	41	7	23	211	19	94	22	18	32	195	288	7	675	32	37	38	109	16	137	385	43	797	19	19	56
LOC116915324	36	8	58	1	5	34	29	61	14	246	0	9	10	9	11	2	48	89	1	9	3	2	1	1	17	0	3	37	3	15	4	4	0	9	31	0	66	12	4	7	18	3	12	139	5	200	8	1	9
LOC116915326	5	2	1	0	2	4	5	10	7	36	0	0	18	2	7	0	30	57	0	0	0	4	0	0	4	0	1	9	0	2	0	2	7	6	16	0	33	0	1	11	9	1	15	33	4	74	0	0	4
LOC116915327	49	37	25	1	10	18	27	22	28	217	10	6	41	22	35	10	31	155	6	11	4	22	2	16	19	11	24	115	14	41	14	9	18	33	31	11	171	19	33	14	64	10	28	51	40	259	20	8	33
LOC116915328	114	79	54	16	45	68	103	72	117	668	2	6	93	53	107	56	213	530	16	26	8	39	16	23	82	22	35	267	17	90	26	27	61	79	117	6	423	14	51	33	73	8	232	132	82	625	18	14	87
LOC116915329	120	87	92	23	46	59	54	39	44	564	24	13	98	38	74	21	63	331	31	32	21	53	16	42	43	12	31	281	34	96	55	30	44	74	66	28	427	11	53	56	96	22	61	77	35	411	23	26	89
LOC116915330	279	208	87	39	113	201	153	244	219	1543	25	24	284	156	287	59	340	1175	71	122	25	111	41	50	193	59	104	776	38	237	118	88	157	305	300	63	1306	28	74	159	403	36	258	305	243	1506	51	36	143
LOC116915331	11	11	2	0	0	3	6	6	2	41	0	2	3	9	3	1	12	30	0	2	5	0	0	0	4	5	0	16	3	10	7	1	6	11	14	2	54	0	1	2	17	0	10	6	1	37	0	1	7
LOC116915332	87	70	32	9	27	43	44	84	35	431	3	4	101	7	64	11	106	296	4	24	5	28	3	26	25	3	3	121	13	64	31	23	41	26	94	3	295	15	40	45	119	2	68	180	25	494	9	3	54
LOC116915333	856	755	562	128	257	216	301	345	177	3597	131	123	670	152	240	57	421	1794	194	453	105	310	99	236	119	20	59	1595	262	960	624	258	330	190	725	20	3369	190	585	306	747	149	217	512	163	2869	274	119	784
LOC116915334	276	208	111	38	84	106	123	186	81	1213	6	18	290	56	169	30	370	939	31	84	33	81	24	74	101	18	78	524	28	157	114	63	134	118	224	18	856	43	110	130	282	23	211	452	117	1368	32	34	154
LOC116915335	188	110	77	9	36	84	120	169	83	876	12	5	142	55	111	16	210	551	22	46	11	31	13	30	46	12	22	233	23	127	61	38	82	87	184	12	614	22	64	44	135	7	100	266	41	679	12	21	122
LOC116915336	5	0	1	0	0	0	5	1	0	12	1	0	3	0	0	0	2	6	1	2	1	0	0	1	0	0	0	5	1	3	1	2	4	0	3	0	14	2	0	1	0	0	1	1	0	5	0	0	3
LOC116915338	121	130	54	18	49	62	79	90	82	685	10	12	197	64	95	41	142	561	37	31	39	62	19	33	48	33	38	340	23	73	58	32	79	133	126	13	537	16	91	52	94	12	132	176	43	616	23	51	91
LOC116915339	87	37	8	0	4	89	242	122	206	795	1	3	132	56	77	10	238	517	6	1	5	4	2	0	31	12	27	88	2	5	6	10	23	436	162	3	647	2	5	12	148	2	175	180	41	565	5	19	16
LOC116915340	1095	265	33	25	85	840	2713	2364	1593	9013	4	6	953	367	1999	289	1755	5373	36	28	14	158	55	38	634	194	113	1270	9	221	66	89	424	2376	2819	69	6073	20	54	193	1228	54	1917	2476	333	6275	28	19	123
LOC116915341	1158	224	21	29	66	669	1648	1624	1194	6633	1	6	1033	301	2148	264	2152	5905	25	21	6	89	31	52	783	145	98	1250	2	183	37	70	330	1503	2333	63	4521	10	26	153	1304	17	1899	2184	256	5849	7	22	71
LOC116915342	1	2	4	0	0	2	0	0	0	9	0	0	9	0	0	0	0	9	5	0	2	0	0	0	0	0	0	7	0	12	5	1	2	0	1	1	22	1	6	0	0	3	0	0	0	10	1	2	5
LOC116915343	3	4	3	1	0	0	2	2	0	15	0	0	2	1	0	0	0	3	1	0	1	0	0	0	0	0	0	2	0	6	9	0	2	0	1	0	18	1	2	0	4	0	0	1	0	8	0	1	14
LOC116915344	1	1	5	0	0	71	3	7	0	88	0	0	2	2	0	0	1	5	0	3	0	0	1	0	0	0	6	10	0	4	7	0	2	3	6	0	22	0	0	1	8	0	1	7	0	17	0	7	7
LOC116915345	16	18	6	0	1	15	13	8	13	90	1	1	4	2	1	0	11	20	3	4	1	0	0	2	8	0	0	18	0	9	3	2	4	5	4	2	29	0	5	7	3	2	4	8	3	32	0	1	5
LOC116915346	93	83	22	26	46	56	58	58	83	525	11	10	102	79	107	53	78	440	19	32	11	35	12	34	58	47	64	312	17	85	33	26	57	121	99	21	459	6	33	52	77	18	99	84	66	435	11	25	58
LOC116915347	17	17	3	0	0	99	21	46	8	211	1	0	0	10	1	1	9	22	1	0	2	0	0	1	6	3	0	13	0	12	2	1	1	16	11	0	43	0	0	0	6	0	4	28	0	38	0	0	18
LOC116915348	64	44	27	14	12	17	54	52	22	306	7	5	70	28	40	4	70	224	15	16	3	21	11	13	18	9	26	132	5	60	28	15	35	37	80	1	261	6	16	30	81	8	45	140	25	351	18	6	51
LOC116915349	146	90	59	20	23	73	186	192	99	888	11	11	114	48	130	27	190	531	28	32	13	24	9	17	42	26	20	211	15	112	36	34	39	143	220	10	609	24	56	54	135	9	128	280	55	741	21	14	76
LOC116915350	5	3	2	0	4	2	0	5	2	23	0	0	9	0	6	0	5	20	0	3	0	3	0	1	3	3	2	15	2	3	0	0	5	2	6	0	18	0	6	4	8	0	1	9	0	28	0	0	9
LOC116915351	88	46	1	19	42	74	118	114	155	657	0	1	168	115	225	54	295	858	19	20	0	56	26	32	109	98	156	516	5	77	14	65	86	238	173	63	721	0	7	105	112	15	166	254	181	840	0	11	19
LOC116915352	59	42	15	6	39	19	69	104	8	361	0	1	100	1	54	0	145	301	2	10	2	34	3	14	18	0	5	88	15	21	19	18	62	13	86	0	234	11	12	36	79	3	39	196	17	393	5	1	34
LOC116915353	33	19	12	4	12	10	21	63	11	185	1	0	75	2	22	6	77	183	2	7	0	25	1	10	15	0	6	66	5	9	10	13	37	4	37	0	115	12	22	30	61	5	30	123	17	300	2	1	13
LOC116915354	31	22	1	0	12	8	49	57	7	187	0	0	89	1	46	2	108	246	0	0	0	6	2	4	10	0	0	22	0	2	0	2	47	6	147	0	204	4	1	17	13	0	85	234	2	356	0	1	15
LOC116915355	7	3	0	0	0	1	1	0	0	12	0	0	2	0	0	0	1	3	0	0	2	0	0	1	0	0	0	3	1	2	0	0	0	0	2	0	5	0	0	0	0	0	1	1	0	2	3	5	2
LOC116915356	221	112	47	12	21	65	164	134	83	859	8	4	139	46	277	23	185	682	14	24	4	36	10	17	91	17	32	245	12	95	39	24	71	146	199	12	598	8	27	43	99	10	214	257	56	714	15	17	85
LOC116915357	0	0	0	0	0	1	4	2	1	8	0	0	0	0	1	0	2	3	0	2	0	0	0	0	1	0	0	3	0	0	1	0	1	0	5	0	7	0	1	0	0	0	0	1	0	2	0	0	6
LOC116915358	151	77	42	17	42	73	139	236	72	849	8	6	194	33	154	15	265	675	14	33	6	88	16	43	51	6	43	300	16	117	31	59	105	76	180	16	600	18	44	94	214	14	119	391	84	978	25	7	60
LOC116915359	268	274	188	48	120	134	216	311	209	1768	34	28	351	110	263	58	406	1250	52	130	40	135	36	116	113	25	100	747	72	301	113	89	141	158	315	42	1231	70	184	124	305	36	246	532	154	1651	66	57	258
LOC116915360	5	7	1	0	21	27	28	34	4	127	2	4	20	6	7	0	24	63	0	3	0	5	1	8	2	0	5	24	1	4	0	6	6	11	19	0	47	1	1	10	10	2	2	55	0	81	0	0	5
LOC116915362	220	101	109	16	28	102	106	90	49	821	21	25	99	38	48	12	111	354	28	70	33	39	6	41	31	7	12	267	56	175	105	29	64	54	126	1	610	33	97	63	130	12	75	159	44	613	64	28	133
LOC116915363	4	0	0	0	0	4	0	4	1	13	1	1	10	0	2	0	0	14	1	0	0	0	0	2	1	0	0	4	2	4	0	1	2	2	2	0	13	0	1	1	2	0	0	2	0	6	0	2	1
LOC116915364	221	101	60	10	49	99	202	253	158	1153	16	8	157	81	178	20	350	810	31	39	5	45	7	24	49	32	46	278	16	93	49	25	65	228	267	9	752	15	36	61	169	9	114	346	80	830	35	12	93
LOC116915365	32	26	14	0	7	22	32	44	11	188	6	4	22	12	14	0	33	91	7	6	1	4	2	1	9	4	7	41	4	16	10	3	9	30	28	2	102	2	19	4	29	6	19	61	8	148	16	2	27
LOC116915366	72	62	30	3	19	38	85	167	78	554	1	1	114	16	124	13	225	494	3	14	1	30	5	11	52	2	27	145	7	47	25	15	60	34	157	6	351	7	19	43	130	2	100	261	69	631	4	0	45
LOC116915367	62	39	13	0	34	15	43	77	12	295	0	1	96	6	53	1	148	305	1	9	1	24	3	27	6	0	14	85	4	22	14	16	51	14	83	0	204	7	28	63	39	2	52	154	21	366	1	6	47
LOC116915368	3	0	1	0	0	0	0	1	1	6	0	0	0	0	2	0	3	5	0	0	0	3	1	0	1	1	0	6	0	1	0	0	0	1	1	0	3	0	3	0	2	0	7	2	0	14	0	0	1
LOC116915369	62	53	21	5	19	58	41	73	61	393	2	6	90	45	79	6	120	348	15	29	4	27	10	31	30	13	18	177	8	70	34	31	61	43	84	17	348	9	31	34	82	2	63	124	44	389	6	6	62
LOC116915370	19	10	3	8	6	6	55	47	59	213	0	3	44	12	64	9	65	197	5	1	3	13	3	3	22	22	28	100	1	15	9	8	25	52	48	10	168	2	4	14	31	6	45	78	35	215	5	0	3
LOC116915371	647	420	149	40	294	391	1132	1402	270	4745	18	22	1206	117	743	84	1825	4015	56	112	33	297	60	185	268	20	113	1144	79	322	205	176	694	443	1598	33	3550	59	214	504	766	41	800	2618	269	5271	95	41	351
LOC116915374	23	12	12	0	9	19	28	49	17	169	1	0	25	6	32	2	48	114	0	3	1	3	1	8	11	6	1	34	2	29	6	8	1	13	42	9	110	7	14	13	33	4	14	81	5	171	2	3	23
LOC116915375	117	54	2	19	29	59	155	267	134	836	1	0	251	88	275	28	438	1081	11	4	0	40	12	18	78	31	61	255	5	55	21	41	110	117	189	21	559	1	7	87	199	7	150	444	101	996	1	1	15
LOC116915376	2	5	0	0	0	1	1	1	0	10	0	0	0	1	0	0	0	1	0	3	0	0	0	0	0	0	0	3	0	0	0	0	0	0	0	0	0	0	2	0	0	0	0	1	0	3	0	0	0
LOC116915377	111	61	25	13	33	83	201	190	164	881	12	11	100	41	113	42	174	493	12	33	7	38	8	27	65	11	33	234	8	77	39	25	47	150	172	22	540	8	34	40	112	10	133	272	41	650	14	13	65
LOC116915378	101	67	34	8	18	52	116	139	55	590	1	3	112	20	72	14	140	362	3	37	10	26	4	21	25	6	12	144	20	58	18	20	37	40	93	3	289	13	29	39	111	9	67	144	27	439	16	3	51
LOC116915379	580	233	55	13	48	255	569	685	290	2728	3	2	1007	188	688	41	470	2399	19	28	29	99	26	40	204	23	52	520	13	86	47	41	154	329	634	3	1307	10	44	131	651	26	644	903	92	2501	13	17	108
LOC116915380	101	87	25	9	64	38	69	67	39	499	7	2	110	15	67	9	123	333	5	20	1	28	12	37	23	5	11	142	6	56	25	18	94	30	89	7	325	7	31	58	106	7	78	150	18	455	5	9	66
LOC116915381	214	45	23	11	31	89	430	324	138	1305	14	13	218	37	498	56	175	1011	8	42	6	26	12	27	172	25	13	331	10	62	23	15	57	381	422	4	974	13	31	48	226	4	348	782	22	1474	27	9	60
LOC116915382	31	19	1	8	11	26	42	51	35	224	0	3	67	11	63	11	91	246	1	4	0	13	7	26	16	6	13	86	5	23	7	11	20	31	59	8	164	1	9	28	52	8	48	125	30	301	1	4	4
LOC116915383	136	88	50	6	33	75	174	163	132	857	13	12	121	46	164	37	137	530	26	17	11	21	9	8	66	73	28	259	13	51	39	11	46	211	268	8	647	2	37	39	155	11	201	301	50	796	17	17	64
LOC116915384	179	69	57	9	13	95	272	140	147	981	9	5	123	41	150	21	474	823	6	19	22	21	9	19	48	9	13	166	10	48	21	21	38	144	208	5	495	11	27	22	164	12	242	260	52	790	6	7	62
LOC116915385	887	485	360	77	302	332	925	1175	378	4921	35	52	763	106	783	107	1250	3096	57	202	64	224	51	242	291	29	62	1222	124	375	260	144	419	316	1662	13	3313	131	309	310	781	48	900	2209	195	4883	104	74	617
LOC116915386	131	83	35	9	27	89	129	161	72	736	4	5	93	19	71	26	192	410	9	21	6	27	6	14	44	7	6	140	10	54	33	17	42	64	120	2	342	12	35	21	130	11	92	199	50	550	10	7	63
LOC116915387	82	205	224	33	41	7	6	51	3	652	19	17	111	20	5	0	27	199	35	109	26	27	10	28	2	0	1	238	15	175	320	108	92	3	42	0	755	54	180	55	404	18	1	12	39	763	16	27	237
LOC116915388	8	5	6	0	0	0	13	11	4	47	0	1	7	1	4	1	10	24	0	5	0	2	0	0	0	0	0	7	0	7	3	2	0	4	11	0	27	2	0	0	3	0	10	10	3	28	0	0	5
LOC116915390	277	203	135	44	99	200	211	266	284	1719	5	11	328	139	343	65	464	1355	52	102	25	157	51	91	214	78	184	954	24	340	134	90	173	319	326	50	1456	25	126	152	325	30	343	387	279	1667	22	21	190
LOC116915391	1402	512	163	37	166	650	1570	1653	815	6968	34	27	1469	312	885	85	2145	4957	76	117	32	202	56	86	345	82	145	1141	46	530	123	138	289	982	1889	52	4049	45	150	264	1204	58	1059	2510	311	5601	33	40	407
LOC116915392	170	71	48	14	44	82	123	173	69	794	4	4	156	25	111	16	199	515	22	40	8	35	5	29	48	4	16	207	20	104	35	33	67	77	168	3	507	17	56	64	145	8	115	335	54	794	17	15	64
LOC116915393	2	2	0	0	0	5	1	2	0	12	1	2	2	0	1	0	1	7	0	2	0	0	0	0	0	0	0	2	0	0	1	0	0	4	4	3	12	3	2	0	0	0	0	2	1	8	0	0	2
LOC116915394	31	4	0	0	0	7	6	4	0	52	0	0	6	0	4	1	2	13	0	0	0	0	1	0	0	0	0	1	1	5	3	0	8	2	2	0	21	0	0	4	4	0	0	11	0	19	0	0	4
LOC116915395	1068	746	338	152	195	542	713	1028	700	5482	42	53	1156	460	1245	198	1463	4617	180	221	59	297	124	176	560	225	372	2214	148	914	293	258	502	983	1148	118	4364	99	237	478	1268	86	1008	1460	646	5282	99	73	492
LOC116915396	64	38	29	9	22	38	92	156	41	489	0	1	82	18	81	12	172	366	6	16	5	22	2	12	39	3	18	123	2	44	15	10	21	47	113	1	253	9	30	36	120	6	69	162	23	455	2	3	30
LOC116915397	57	56	35	4	51	11	20	28	9	271	0	1	53	6	16	1	49	126	6	19	1	30	3	39	12	3	3	116	6	48	32	26	46	5	45	0	208	6	40	30	57	1	21	55	9	219	6	4	63
LOC116915398	0	0	0	0	0	0	1	0	0	1	0	0	0	0	0	2	0	2	0	0	1	0	0	0	0	0	0	1	1	0	1	0	0	0	0	0	2	0	2	0	0	0	0	0	0	2	0	0	0
LOC116915399	0	0	0	0	0	0	0	0	0	0	0	0	0	0	0	0	0	0	0	0	0	0	0	1	0	0	1	2	0	0	0	0	0	0	0	0	0	1	2	0	0	0	1	11	0	15	1	0	0
LOC116915400	0	0	0	0	0	1	0	0	0	1	0	0	0	0	0	0	0	0	0	0	0	0	0	0	0	0	0	0	0	0	0	0	0	0	0	0	0	0	0	0	0	0	0	0	0	0	0	0	0
LOC116915401	353	449	488	138	397	32	35	2	29	1923	86	255	1294	119	47	63	1	1865	293	506	170	809	69	680	5	3	2	2537	258	888	975	672	434	145	571	2	3945	277	842	597	339	147	73	82	140	2497	117	169	806
LOC116915402	1069	705	343	111	222	475	1356	2149	828	7258	50	69	1175	214	1295	129	2674	5606	89	196	117	234	73	174	457	79	118	1537	105	737	247	126	414	503	2073	21	4226	94	322	425	1055	63	1306	2924	316	6505	144	71	476
LOC116915403	40	18	3	3	4	42	53	58	67	288	0	0	43	13	73	14	192	335	2	0	4	14	3	9	18	6	10	66	2	3	12	10	35	78	58	4	202	3	1	16	60	7	89	194	49	419	1	7	7
LOC116915404	4	1	0	0	5	8	5	8	5	36	0	0	4	1	15	0	6	26	0	0	0	1	0	2	1	0	0	4	1	0	4	3	6	3	10	0	27	0	6	0	4	0	13	20	0	43	3	0	0
LOC116915405	1	0	0	0	0	0	0	0	0	1	0	0	2	0	1	0	0	3	0	0	0	0	0	0	0	0	0	0	0	0	0	0	0	0	1	0	1	0	0	0	0	0	0	0	0	0	0	0	0
LOC116915406	1	0	1	0	0	1	2	0	0	5	0	0	0	0	0	0	2	2	0	1	0	0	0	0	0	0	0	1	0	1	0	0	0	0	0	0	1	1	0	0	0	0	0	0	0	1	0	0	0
LOC116915407	11	4	5	1	2	4	12	10	10	59	1	0	5	1	7	3	22	39	0	2	0	6	0	1	1	0	4	14	0	2	0	3	5	8	14	3	35	0	0	7	9	0	11	17	2	46	4	0	2
LOC116915408	1	1	0	0	0	0	1	0	0	3	0	0	0	0	0	0	1	1	0	2	0	0	0	1	0	0	1	4	1	0	0	0	2	0	0	0	3	0	0	2	0	0	0	3	0	5	1	0	4
LOC116915409	22	18	9	7	23	10	25	40	51	205	0	0	35	8	41	6	57	147	4	8	1	8	6	2	17	4	6	56	1	16	9	2	25	39	68	6	166	1	7	10	23	7	44	70	13	175	4	3	8
LOC116915411	256	136	51	14	38	177	526	724	194	2116	7	8	259	53	311	17	771	1426	18	49	13	60	17	42	81	5	20	305	25	114	42	34	58	190	572	5	1040	30	33	63	388	14	180	987	71	1766	10	9	82
LOC116915412	16	18	6	1	1	3	10	16	4	75	1	2	23	1	9	5	14	55	4	2	3	3	1	6	4	0	0	23	1	8	11	2	12	6	31	1	72	2	12	14	12	1	13	12	4	70	2	0	28
LOC116915413	734	412	167	110	169	505	1237	1615	688	5637	57	49	887	321	1058	110	1568	4050	78	101	41	209	81	132	319	192	244	1397	75	558	218	158	257	900	1525	70	3761	74	176	300	1015	63	814	2277	350	5069	79	48	289
LOC116915414	1	0	0	0	0	0	0	0	0	1	0	0	0	0	0	0	0	0	0	0	0	0	1	0	0	0	0	1	0	0	0	0	0	0	0	3	3	0	1	0	0	0	0	0	0	1	0	4	0
LOC116915415	0	0	0	0	0	0	0	0	0	0	0	0	0	0	0	0	0	0	0	0	0	0	0	0	0	0	0	0	0	0	0	0	0	0	0	0	0	0	1	0	0	0	1	0	0	2	0	0	1
LOC116915416	0	0	0	0	0	0	0	0	0	0	0	0	0	0	0	0	0	0	0	6	0	0	0	0	0	0	0	6	2	0	0	0	2	0	0	0	4	0	0	0	0	0	0	0	0	0	0	0	1
LOC116915417	1	1	5	0	0	0	1	0	1	9	0	0	0	1	0	0	0	1	0	2	0	0	0	0	0	0	0	2	0	6	2	1	0	0	1	0	10	0	2	0	2	0	2	0	0	6	0	4	6
LOC116915418	257	86	62	40	233	129	250	300	28	1385	27	6	316	45	216	53	1	664	37	71	13	103	37	81	67	27	8	444	38	138	52	46	175	159	152	3	763	37	67	202	502	26	17	859	20	1730	19	31	148
LOC116915419	1	2	1	0	0	0	2	2	4	12	0	0	2	0	8	0	1	11	0	0	0	0	0	1	2	0	0	3	1	1	1	0	0	0	4	0	7	0	0	0	1	1	1	3	0	6	0	0	0
LOC116915420	458	250	169	39	66	309	610	666	471	3038	30	19	305	161	401	54	829	1799	41	101	48	54	19	47	170	66	61	607	53	209	107	55	112	524	571	18	1649	23	144	84	404	24	358	787	165	1989	43	39	203
LOC116915422	272	60	24	8	389	58	56	39	10	916	7	5	164	15	21	3	18	233	6	32	3	122	25	72	5	3	0	268	12	74	42	27	200	52	60	0	467	41	71	158	186	17	19	111	5	608	15	25	135
LOC116915423	195	144	52	19	64	146	242	361	192	1415	5	8	259	79	227	33	332	943	30	23	9	51	13	24	122	48	81	401	18	137	29	50	98	319	290	17	958	4	30	81	242	16	205	438	108	1124	28	6	95
LOC116915424	36	11	10	4	18	17	14	12	13	135	6	0	56	20	27	12	3	124	1	8	14	23	8	3	7	3	6	73	12	4	14	8	13	33	14	0	98	5	6	15	18	2	24	19	1	90	9	15	10
LOC116915425	101	81	85	15	43	60	94	125	101	705	4	6	96	24	113	9	178	430	8	36	13	33	11	16	53	17	16	203	17	65	33	29	38	87	128	1	398	18	50	55	122	11	96	153	42	547	14	7	87
LOC116915426	48	13	22	11	43	8	17	7	0	169	2	4	29	10	14	6	0	65	1	6	4	6	1	6	4	4	0	32	11	51	1	5	5	4	16	7	100	3	21	27	40	2	2	32	1	128	3	3	40
LOC116915427	82	28	18	4	14	30	140	112	47	475	5	4	56	12	65	13	156	311	1	8	1	20	6	13	30	12	9	100	8	34	23	13	12	43	154	1	288	7	9	21	60	1	77	192	21	388	3	5	33
LOC116915428	2	3	0	0	1	0	2	4	6	18	0	0	4	2	3	0	10	19	0	0	0	5	0	0	0	0	1	6	0	0	0	1	0	0	1	0	2	0	0	1	5	1	1	5	0	13	3	0	3
LOC116915429	382	57	37	13	76	260	716	861	174	2576	5	4	250	30	235	18	703	1245	11	40	17	46	6	31	55	3	27	236	16	56	24	21	134	208	544	11	1014	15	40	107	215	3	201	1038	50	1669	14	10	79
LOC116915431	0	8	4	0	3	3	3	3	7	31	0	1	1	4	1	0	7	14	0	3	0	2	0	2	1	0	1	9	1	4	1	0	2	1	5	0	14	1	6	2	6	1	2	5	1	24	0	0	6
LOC116915432	255	88	18	5	42	121	178	332	72	1111	1	0	210	15	160	19	369	774	12	24	6	39	12	26	61	4	11	195	9	53	20	26	84	65	270	10	537	11	33	60	168	13	142	455	50	932	11	10	63
LOC116915433	131	37	48	8	30	65	152	149	157	777	12	14	64	49	107	30	166	442	15	28	15	23	7	27	44	45	22	226	12	99	35	10	14	159	152	7	488	6	54	23	131	9	80	157	39	499	3	2	52
LOC116915434	85	46	3	8	13	25	54	39	16	289	3	0	75	31	36	6	9	160	15	9	2	10	3	2	15	15	17	88	2	34	19	5	13	35	26	15	149	3	8	20	63	5	24	80	6	209	3	5	35
LOC116915435	1	0	0	0	1	0	0	0	0	2	0	0	0	1	0	0	0	1	0	0	0	0	0	0	0	0	0	0	0	1	0	0	0	0	0	0	1	0	0	0	0	0	0	0	0	0	0	0	2
LOC116915436	1	0	0	0	0	0	3	0	0	4	0	0	1	0	0	0	0	1	0	0	0	0	0	0	0	0	1	1	0	0	0	0	0	0	0	0	0	0	0	0	0	0	1	1	0	2	0	1	0
LOC116915437	3	1	3	0	1	0	0	0	0	8	0	0	0	0	0	0	0	0	0	0	0	0	0	0	0	0	0	0	0	0	3	0	0	0	0	0	3	0	0	0	0	0	0	0	0	0	0	0	8
LOC116915438	247	670	645	84	174	17	46	5	20	1908	44	67	348	113	10	7	1	590	183	379	140	93	37	78	0	1	4	915	70	759	1103	264	243	37	152	0	2628	142	477	158	659	40	27	33	83	1619	92	96	753
LOC116915439	103	40	46	11	18	75	148	182	110	733	8	3	71	35	96	6	187	406	5	22	13	32	3	22	32	14	17	160	7	59	37	24	15	91	158	3	394	13	21	18	112	7	98	247	38	554	12	3	61
LOC116915440	309	84	19	27	26	382	1690	1522	518	4577	13	3	301	91	641	43	979	2071	17	18	7	47	17	24	143	30	69	372	23	90	35	38	87	827	1389	28	2517	17	26	66	490	13	634	2085	74	3405	16	15	60
LOC116915441	125	56	41	7	32	63	184	209	67	784	8	5	149	20	165	22	193	562	5	8	7	18	6	12	51	8	7	122	16	35	25	13	21	82	284	2	478	10	26	42	124	6	182	468	17	875	9	15	42
LOC116915442	10	19	8	0	10	0	2	0	0	49	1	0	16	0	1	0	0	18	0	0	0	3	1	4	0	1	0	9	3	13	0	2	12	0	4	0	34	6	11	21	4	0	2	3	0	47	5	0	29
LOC116915443	41	27	11	0	10	7	9	11	1	117	1	1	14	1	10	1	8	36	3	5	9	8	3	2	1	0	0	31	4	13	15	5	0	3	12	0	52	1	11	14	21	1	7	20	1	76	3	7	22
LOC116915444	17	15	5	0	24	8	2	4	0	75	2	0	13	2	6	0	0	23	6	4	1	4	0	11	1	0	0	27	6	21	11	7	26	6	8	0	85	2	15	15	9	2	0	5	0	48	0	3	30
LOC116915445	93	41	26	16	42	224	606	804	465	2317	7	6	281	27	736	71	672	1800	1	11	19	24	6	19	174	82	28	364	24	28	16	13	93	593	1087	16	1870	18	29	37	268	16	1023	1462	25	2878	10	25	41
LOC116915446	203	101	55	30	69	136	344	429	337	1704	25	15	273	117	434	53	631	1548	24	40	22	83	34	47	151	83	172	656	32	170	57	65	78	338	425	45	1210	20	54	48	286	23	277	564	205	1477	11	37	67
LOC116915447	0	0	0	0	0	5	2	1	0	8	0	1	0	0	0	0	2	3	0	0	0	1	0	0	0	0	0	1	2	0	0	1	0	0	1	0	4	1	1	1	0	0	0	0	0	3	0	0	0
LOC116915448	78	249	375	42	33	5	9	40	1	832	57	54	200	22	0	0	31	364	95	228	72	59	12	30	0	4	4	504	79	395	412	167	82	20	45	0	1200	156	259	96	219	30	4	10	37	811	29	20	371
LOC116915449	68	175	98	18	24	8	22	10	1	424	11	34	147	30	3	1	1	227	16	84	22	22	12	38	0	0	1	195	13	144	192	69	56	5	119	0	598	47	156	61	287	11	2	24	32	620	28	36	211
LOC116915450	89	64	44	3	27	32	109	146	56	570	10	3	128	28	112	12	243	536	8	23	9	28	12	16	43	8	28	175	7	72	34	27	29	48	148	5	370	15	34	46	108	8	68	274	59	612	7	6	50
LOC116915451	186	115	4	37	79	313	82	120	249	1185	9	1	647	91	161	51	477	1437	16	7	23	86	14	26	79	14	77	342	29	1	37	45	355	190	212	3	872	3	14	126	256	46	398	282	107	1232	18	78	80
LOC116915452	28	4	0	1	2	0	3	0	0	38	0	0	7	0	0	0	0	7	0	0	1	3	1	0	0	0	0	5	0	0	0	1	5	1	4	0	11	0	0	4	15	3	0	7	0	29	0	2	3
LOC116915453	53	11	1	0	0	0	0	2	0	67	0	0	11	3	0	0	0	14	0	3	0	0	0	0	0	0	0	3	1	1	5	3	3	0	0	0	13	1	7	1	33	0	0	1	0	43	2	1	4
LOC116915454	33	87	46	1	36	2	6	8	5	224	3	3	78	3	5	0	12	104	4	13	3	15	2	20	0	0	2	59	15	53	67	47	58	8	27	0	275	21	86	56	55	8	11	22	3	262	5	7	115
LOC116915455	6	0	0	0	0	4	4	1	5	20	0	0	7	0	1	0	9	17	0	0	0	0	0	2	2	0	0	4	0	0	0	0	5	9	3	1	18	0	1	1	1	0	6	2	0	11	0	0	2
LOC116915456	55	164	162	27	28	8	12	28	3	487	15	21	133	24	1	4	9	207	18	52	17	47	2	68	0	0	3	207	24	163	158	105	113	8	47	0	618	42	160	72	123	9	9	18	17	450	16	11	268
LOC116915457	33	18	8	0	32	24	45	83	26	269	0	0	84	5	23	7	100	219	0	4	7	25	2	10	17	2	2	69	3	6	8	9	54	21	97	0	198	2	14	41	67	4	83	244	13	468	3	7	24
LOC116915460	232	102	71	40	45	178	453	357	360	1838	18	18	203	174	319	44	440	1216	36	77	24	76	16	33	127	96	123	608	33	184	90	51	104	464	318	65	1309	30	63	69	237	32	222	493	160	1306	32	29	76
LOC116915462	216	136	20	14	40	349	119	75	365	1334	4	3	816	138	291	93	692	2037	14	7	31	94	22	47	81	18	108	422	18	0	48	75	295	479	317	16	1248	3	7	140	170	70	798	273	160	1621	14	115	62
LOC116915463	26	17	36	0	2	27	38	26	65	237	5	0	38	16	34	15	98	206	6	9	0	4	1	3	30	15	6	74	3	16	10	2	8	75	68	1	183	5	8	9	66	1	71	82	48	290	7	5	18
LOC116915464	261	356	312	90	264	91	81	24	34	1513	156	176	1276	271	174	134	2	2189	153	457	120	962	75	557	28	21	3	2376	154	706	512	339	188	143	351	1	2394	383	542	477	697	194	132	414	114	2953	348	171	628
LOC116915466	5	1	0	0	0	0	6	4	0	16	0	0	5	1	0	0	3	9	0	0	0	0	0	0	0	0	0	0	2	0	0	0	2	2	2	0	8	0	2	0	0	0	1	4	0	7	0	0	1
LOC116915467	21	5	0	6	17	17	4	8	25	103	1	0	62	6	8	7	30	114	4	3	4	24	1	1	4	0	5	46	6	0	4	2	71	31	9	2	125	0	2	28	17	5	29	17	5	103	1	24	4
LOC116915468	42	19	5	2	9	46	117	129	47	416	3	1	44	23	54	0	129	254	4	3	6	5	2	5	17	0	4	46	3	16	3	5	17	60	130	3	237	2	13	17	48	4	31	146	6	267	3	0	9
LOC116915469	728	258	96	28	112	361	744	1014	281	3622	31	27	536	108	515	62	1165	2444	60	71	39	127	35	109	159	53	73	726	50	222	106	81	168	483	985	42	2137	50	103	213	650	35	421	1524	197	3193	67	42	246
LOC116915470	691	295	34	93	114	1023	260	222	861	3593	29	11	2227	486	716	248	1255	4972	49	42	131	348	91	120	252	69	337	1439	47	4	134	199	690	1302	779	83	3238	5	76	378	524	144	1651	678	311	3767	78	410	152
LOC116915471	19	19	3	18	33	30	14	20	51	207	5	2	85	16	29	16	50	203	4	3	11	26	15	12	18	4	25	118	14	0	11	9	80	59	37	2	212	0	12	28	25	21	68	49	17	220	7	43	14
LOC116915472	120	101	11	19	46	202	80	89	149	817	4	1	462	79	171	39	453	1209	4	4	26	55	11	31	47	9	54	241	6	3	26	44	209	188	236	8	720	1	24	116	178	27	429	222	109	1106	17	64	42
LOC116915473	267	151	23	23	34	229	87	138	154	1106	0	1	1020	49	118	34	356	1578	8	5	22	91	20	31	57	3	39	276	13	3	27	60	233	197	264	5	802	1	13	109	178	38	455	309	41	1144	8	100	79
LOC116915474	683	244	13	127	97	890	230	299	828	3411	32	8	1421	351	468	119	994	3393	36	28	93	207	71	77	185	52	273	1022	61	7	79	139	432	920	444	16	2098	1	54	292	526	125	790	528	293	2609	41	351	153
LOC116915477	4108	2181	902	394	832	2623	6802	8118	2941	28901	203	210	4313	1379	5929	663	8765	21462	331	646	272	1146	343	714	2028	467	1056	7003	486	2439	1012	906	1522	4326	9106	267	20064	456	901	1361	5724	279	4735	11774	2131	27361	509	235	1300
LOC116915478	225	115	4	34	82	214	79	181	212	1146	3	5	960	82	166	53	1002	2271	8	12	18	149	30	47	57	8	99	428	14	1	34	78	514	213	290	19	1163	1	11	240	250	34	429	585	147	1697	23	110	91
LOC116915479	1	0	0	0	10	6	2	2	0	21	0	0	6	0	1	0	1	8	0	0	0	0	2	0	0	0	0	2	0	0	0	0	3	3	2	0	8	0	3	1	0	0	7	4	0	15	0	5	1
LOC116915480	63	8	1	4	9	27	15	21	23	171	1	0	139	6	24	14	212	396	1	0	3	21	0	7	11	1	12	56	1	1	2	11	66	36	54	3	174	1	2	35	16	3	53	56	36	202	0	6	7
LOC116915481	556	697	439	151	127	51	71	721	22	2835	44	86	652	187	19	13	320	1321	83	330	133	124	47	199	20	0	22	958	87	562	1030	572	326	93	215	1	2886	204	638	293	2403	66	42	196	285	4127	112	104	783
LOC116915482	394	116	18	16	67	221	60	83	85	1060	10	5	615	61	86	13	180	970	9	13	28	63	14	43	29	15	31	245	16	10	37	42	196	111	109	1	522	4	19	135	174	28	191	196	27	774	22	81	97
LOC116915483	637	234	18	27	49	420	209	234	324	2152	6	2	1437	222	313	89	665	2734	10	5	48	125	34	59	89	11	97	478	22	3	48	105	332	570	410	14	1504	3	27	173	403	61	657	586	114	2024	18	160	128
LOC116915484	683	227	24	26	79	340	178	257	172	1986	20	7	1220	164	202	42	323	1978	24	31	34	77	30	53	76	9	35	369	30	9	45	75	310	478	356	13	1316	6	31	176	312	51	461	533	32	1602	12	175	137
LOC116915486	464	102	21	22	66	131	64	112	47	1029	3	1	756	44	76	10	60	950	7	23	16	81	11	41	53	4	23	259	9	5	20	70	240	81	89	0	514	2	22	152	154	15	117	222	11	695	8	55	103
LOC116915487	4	0	0	0	3	0	1	2	1	11	0	0	4	0	0	0	2	6	1	0	0	2	0	0	0	0	0	3	0	0	0	1	0	2	2	0	5	0	0	2	1	0	2	2	0	7	0	0	0
LOC116915488	308	79	13	26	54	126	37	45	98	786	6	4	727	53	130	37	293	1250	6	22	14	129	10	49	54	4	47	335	10	5	44	73	366	86	114	7	705	2	34	127	79	13	273	149	58	735	15	99	61
LOC116915489	138	86	4	14	48	30	10	75	16	421	4	5	366	25	20	14	36	470	4	8	13	64	8	32	21	3	14	167	9	5	5	31	220	38	69	7	384	2	16	108	32	8	54	244	6	470	7	48	51
LOC116915490	78	27	10	12	71	9	13	26	12	258	15	1	75	6	17	7	1	122	7	7	7	22	8	19	3	3	2	78	9	9	7	10	63	32	20	0	150	3	8	70	21	4	12	33	0	151	8	15	31
LOC116915491	48	16	35	1	67	16	18	0	3	204	12	11	64	2	21	6	1	117	8	21	8	43	6	21	1	2	1	111	25	72	24	10	42	8	58	1	240	14	48	35	38	7	15	29	7	193	18	6	43
LOC116915492	73	3	0	0	0	5	37	59	4	181	0	0	34	4	9	1	49	97	4	1	0	0	0	0	5	1	3	14	1	0	0	2	10	15	25	0	53	2	4	3	28	0	25	70	1	133	0	1	10
LOC116915493	29	75	30	2	19	4	1	5	0	165	2	2	12	0	0	0	9	25	2	7	1	14	1	4	0	0	0	29	0	6	66	33	50	2	9	0	166	12	64	11	20	0	0	13	5	125	3	4	61
LOC116915494	265	129	20	13	49	216	74	125	177	1068	2	3	955	84	183	62	498	1787	4	3	36	180	23	78	67	9	99	499	9	6	39	94	399	177	161	9	894	3	35	188	136	31	421	223	80	1117	16	132	72
LOC116915495	295	111	28	3	83	88	110	97	148	963	21	8	249	51	84	20	148	581	45	48	2	35	15	26	37	4	23	235	30	66	18	8	45	166	89	3	425	15	27	49	113	29	110	105	22	470	15	25	133
LOC116915496	0	1	3	1	10	1	5	11	5	37	1	1	13	10	1	0	4	30	0	1	0	1	0	4	6	3	1	16	1	2	3	1	0	6	2	1	16	0	3	0	5	0	5	3	2	18	4	3	2
LOC116915497	71	26	4	0	3	4	3	3	0	114	0	0	67	1	3	0	0	71	1	5	1	13	2	0	3	0	0	25	0	11	2	2	6	3	15	0	39	0	3	10	16	0	0	30	0	59	0	1	42
LOC116915500	633	219	19	31	26	400	526	571	990	3415	13	1	1785	367	652	142	2014	4974	29	11	16	121	25	42	221	27	187	679	25	12	38	91	219	753	685	25	1848	6	21	94	516	45	1448	824	444	3398	15	84	136
LOC116915501	15	2	3	0	3	5	17	9	8	62	0	0	17	2	7	1	25	52	0	0	1	2	0	0	3	0	0	6	2	0	0	2	5	18	19	0	46	1	1	2	18	0	8	22	0	52	0	4	6
LOC116915502	7	6	2	2	16	8	6	9	8	64	3	0	14	4	24	8	13	66	11	3	1	8	1	1	9	1	7	42	1	12	2	5	13	9	7	9	58	2	7	10	8	9	10	18	23	87	1	6	3
LOC116915503	423	293	30	11	11	407	882	936	365	3358	0	3	1767	287	303	18	959	3337	32	10	7	30	21	13	111	8	14	246	6	14	34	64	129	782	647	7	1683	4	19	40	753	20	627	655	40	2158	4	52	92
LOC116915504	82	31	12	7	24	53	16	27	38	290	1	0	366	16	46	8	164	601	1	1	5	55	7	15	27	1	20	132	6	0	10	22	119	34	63	1	255	1	5	68	53	13	152	75	42	409	0	21	16
LOC116915506	1	8	1	0	2	4	2	2	3	23	0	2	1	1	1	0	3	8	0	1	0	1	0	0	1	0	0	3	0	3	0	1	7	0	6	0	17	1	1	3	2	2	0	2	0	11	0	0	7
LOC116915507	451	207	98	67	143	324	686	639	622	3237	44	26	351	335	675	164	750	2345	85	118	64	140	38	73	261	194	219	1192	49	261	114	107	178	836	688	163	2396	39	119	116	492	55	446	775	275	2317	67	54	126
LOC116915508	76	9	8	0	4	20	209	169	156	651	0	1	63	18	197	34	261	574	0	2	1	9	4	6	67	20	12	121	3	12	3	4	13	144	355	6	540	0	6	7	94	0	150	279	37	573	0	2	12
LOC116915509	1	2	0	0	0	0	2	5	0	10	0	0	4	3	1	0	2	10	0	0	0	0	0	1	0	0	1	2	0	0	0	2	3	1	4	0	10	0	0	0	0	2	5	10	0	17	0	0	2
LOC116915510	2	0	0	0	2	0	3	6	0	13	0	0	2	1	4	0	10	17	0	0	0	0	0	0	0	0	1	1	0	2	0	0	0	2	4	0	8	0	0	4	0	0	0	5	1	10	0	0	0
LOC116915511	17	6	0	0	4	8	17	23	12	87	0	0	13	5	8	0	7	33	0	1	4	1	4	0	1	0	2	13	0	4	4	5	12	28	18	0	71	0	0	0	25	0	11	22	0	58	0	0	6
LOC116915512	3284	794	125	29	304	518	915	980	1022	7971	19	24	1961	385	1046	129	927	4491	286	188	29	214	109	70	301	92	134	1423	55	414	127	86	358	1400	1418	73	3931	55	97	397	1614	117	1326	1322	153	5081	64	107	835
LOC116915513	1740	986	309	392	497	1282	2725	2928	3137	13996	121	118	1773	1470	2813	505	4053	10853	327	397	166	763	278	353	1186	663	1545	5678	204	1412	386	495	736	3566	2643	754	10196	144	365	666	2360	210	1955	3181	1796	10677	217	182	461
LOC116915514	19	3	0	0	1	1	8	23	1	56	0	0	8	0	0	1	17	26	0	0	0	0	0	0	0	0	0	0	0	0	0	0	4	0	10	0	14	1	0	1	4	0	6	29	0	41	0	0	4
LOC116915515	465	70	30	4	75	14	59	148	16	881	0	0	301	0	44	10	177	532	2	34	1	44	3	22	9	0	2	117	11	34	21	10	131	27	161	1	396	12	15	78	123	4	85	381	4	702	1	5	168
LOC116915517	0	0	0	0	0	2	0	0	0	2	0	0	1	0	0	0	0	1	0	0	0	0	0	0	0	0	0	0	0	0	0	0	0	0	0	0	0	0	0	0	0	0	0	1	0	1	0	0	0
LOC116915518	105	5	2	0	2	0	26	112	0	252	0	0	53	0	6	0	49	108	0	0	0	2	0	2	1	0	0	5	0	2	2	0	18	2	46	0	70	1	1	10	11	1	25	179	1	229	0	0	17
LOC116915520	384	55	11	1	51	64	137	143	119	965	2	8	393	47	84	8	336	878	32	10	2	23	1	19	32	3	18	140	10	17	10	18	85	189	236	5	570	6	21	72	156	5	206	348	8	822	8	15	83
LOC116915521	1	0	0	0	10	0	1	5	0	17	0	0	5	0	0	0	2	7	0	0	0	0	0	1	0	0	0	1	0	0	0	0	7	0	4	0	11	2	0	5	0	0	2	2	0	11	0	0	1
LOC116915522	269	36	5	5	51	9	66	121	27	589	0	3	235	10	20	3	170	441	6	2	0	10	2	6	9	1	2	38	7	8	8	8	61	44	84	1	221	11	9	52	63	1	94	246	4	480	2	7	62
LOC116915524	8	3	0	0	1	3	2	6	2	25	0	0	3	0	4	0	3	10	0	2	0	3	1	4	1	0	0	11	2	1	0	0	3	1	2	0	9	1	0	8	0	0	1	6	0	16	0	0	6
LOC116915525	27	8	0	0	10	10	20	36	20	131	0	0	43	5	13	2	47	110	2	1	0	7	1	4	10	1	3	29	4	2	3	2	13	30	22	4	80	1	0	14	10	3	26	75	2	131	0	2	3
LOC116915526	1	0	1	0	0	0	3	5	0	10	0	0	2	0	0	0	1	3	0	0	0	0	1	0	0	0	0	1	0	0	0	0	3	1	9	0	13	0	0	1	3	0	1	3	0	8	0	0	0
LOC116915527	41	10	4	2	57	7	25	51	4	201	0	1	70	0	18	1	94	184	0	2	1	3	0	7	4	0	1	18	4	5	3	5	43	9	55	0	124	2	3	26	26	2	39	152	0	250	1	3	34
LOC116915528	264	25	7	1	64	22	96	206	21	706	1	4	178	4	29	5	203	424	4	3	0	21	1	6	5	1	3	44	3	13	8	10	92	51	126	0	303	3	21	44	93	2	78	431	2	674	2	9	103
LOC116915529	0	0	0	0	0	0	0	0	0	0	0	0	0	0	0	0	0	0	0	0	0	0	0	0	0	0	0	0	0	0	0	0	0	0	0	0	0	0	0	0	0	0	0	0	0	0	0	0	0
LOC116915531	24	22	0	0	0	93	22	42	15	218	0	0	0	8	1	6	26	41	5	3	0	0	0	1	34	5	1	49	0	7	1	1	0	52	42	2	105	0	2	4	6	0	5	29	19	65	0	1	2
LOC116915532	191	115	88	6	12	32	35	137	5	621	3	8	33	17	10	3	54	128	14	51	7	34	1	10	9	0	3	129	9	59	112	69	30	39	82	0	400	52	51	18	96	10	21	102	28	378	14	10	99
LOC116915534	39	45	85	38	65	5	15	1	4	297	22	22	122	27	8	12	2	215	18	33	16	112	10	74	1	0	0	264	31	84	78	62	56	23	103	0	437	21	83	66	94	21	13	25	45	368	17	16	92
LOC116915535	247	502	474	69	86	16	30	103	4	1531	54	55	231	52	5	3	42	442	155	256	92	50	15	73	11	1	0	653	102	606	821	253	182	56	267	0	2287	129	573	116	412	27	10	40	102	1409	57	66	574
LOC116915536	86	88	102	27	173	5	3	1	2	487	5	26	256	5	5	9	0	306	12	95	17	224	8	142	1	0	1	500	47	144	243	164	157	2	100	0	857	74	220	209	114	18	18	22	22	697	17	37	158
LOC116915537	58	40	47	16	85	5	2	0	3	256	4	8	169	2	9	8	0	200	7	50	10	139	4	83	1	0	0	294	16	94	134	88	63	7	71	0	473	44	117	105	55	12	12	21	14	380	14	19	96
LOC116915538	14	35	34	13	47	0	2	1	0	146	7	11	64	5	3	8	0	98	9	14	5	58	2	70	0	0	0	158	4	35	67	61	50	8	35	0	260	21	61	78	30	8	4	5	14	221	3	6	55
LOC116915539	1771	280	123	8	119	349	1013	974	628	5265	24	13	1222	184	331	41	1258	3073	144	82	22	44	18	29	78	20	35	472	41	151	55	36	110	1461	868	13	2735	30	38	84	909	25	698	1305	49	3138	11	48	300
LOC116915541	64	40	8	3	15	96	112	115	57	510	1	1	135	12	52	10	391	602	1	0	4	6	3	11	26	0	13	64	4	6	0	14	30	62	106	0	222	2	0	22	116	3	109	247	39	538	1	6	18
LOC116915543	28	47	15	0	26	13	15	45	6	195	0	0	97	0	41	1	127	266	1	10	3	49	2	26	22	0	7	120	2	20	17	13	71	2	84	0	209	14	33	71	53	2	67	97	18	355	4	3	36
LOC116915546	106	93	32	29	67	72	136	152	264	951	1	6	140	72	216	67	384	886	26	43	18	64	18	37	104	28	129	467	12	104	41	62	66	143	221	36	685	6	56	87	148	30	198	207	114	846	12	22	52
LOC116915547	84	59	35	12	15	79	94	110	141	629	5	4	109	65	151	22	144	500	14	34	24	45	10	33	55	34	52	301	24	79	47	25	44	156	127	18	520	17	39	53	111	9	111	171	75	586	15	18	31
LOC116915548	39	18	0	0	13	58	86	140	125	479	0	0	135	41	191	14	228	609	8	2	0	32	7	8	66	23	45	191	0	26	8	20	47	130	153	13	397	1	3	30	99	0	91	240	85	549	7	3	5
LOC116915549	16	19	0	1	12	16	46	69	48	227	1	0	61	24	81	3	152	322	1	3	0	19	2	9	27	4	30	95	0	17	4	11	35	31	62	4	164	0	1	29	52	3	39	105	39	268	0	0	2
LOC116915550	22	22	10	4	18	10	50	65	55	256	2	4	52	24	80	6	99	267	7	9	5	17	6	6	26	12	21	109	4	29	17	14	23	58	71	3	219	7	11	15	60	6	47	87	26	259	9	4	10
LOC116915551	61	31	19	15	28	70	123	102	127	576	2	8	112	70	217	35	197	641	17	14	12	44	10	28	68	29	62	284	16	66	15	41	61	139	149	29	516	2	32	35	86	14	128	182	94	573	6	9	14
LOC116915552	15	9	5	0	2	8	26	17	24	106	1	0	9	1	19	1	14	45	0	4	1	0	2	5	5	3	1	21	1	8	1	1	1	23	27	0	62	2	7	4	10	1	18	20	3	65	0	3	9
LOC116915553	29	13	1	4	24	10	61	79	76	297	2	2	52	26	88	13	122	305	3	3	0	20	11	9	39	9	54	148	1	38	12	19	31	44	79	13	237	0	10	38	53	12	60	118	45	336	3	2	3
LOC116915554	16	9	1	6	5	7	16	28	9	97	2	0	25	6	17	1	32	83	0	2	0	9	5	2	11	2	6	37	4	9	12	5	17	12	16	2	77	2	6	10	8	0	13	34	7	80	6	4	8
LOC116915558	3	0	0	0	0	2	6	12	7	30	1	0	2	9	5	1	21	39	0	0	0	0	0	1	3	1	3	8	0	1	0	1	1	6	11	3	23	0	0	2	3	0	4	12	2	23	0	0	2
LOC116915559	17	6	0	0	1	6	11	10	2	53	0	2	6	5	9	7	9	38	1	2	2	0	1	3	3	0	1	13	1	3	3	0	3	13	11	0	34	2	3	5	19	0	4	10	2	45	0	0	5
LOC116915560	6	4	4	0	7	3	21	35	22	102	0	2	18	5	26	3	59	113	0	0	0	3	1	1	13	0	6	24	0	3	2	5	19	14	23	5	71	0	2	13	26	0	19	54	7	121	0	0	0
LOC116915562	17	12	2	3	1	8	27	45	2	117	5	3	4	1	5	0	3	21	1	1	3	1	0	0	4	0	0	10	1	3	6	8	3	12	28	0	61	0	8	7	13	1	1	26	0	56	4	1	5
LOC116915563	5	1	2	3	0	8	13	9	17	58	1	0	3	3	20	2	18	47	0	0	3	0	1	0	5	5	2	16	1	2	0	0	1	8	12	2	26	0	3	7	8	0	8	14	3	43	6	0	1
LOC116915564	7	6	5	1	7	12	17	19	28	102	1	0	2	8	20	1	16	48	1	1	2	6	1	2	4	4	2	23	5	5	3	1	8	17	10	6	55	1	0	2	11	0	10	24	5	53	0	2	2
LOC116915566	23	18	4	1	5	8	19	9	17	104	2	2	10	1	9	2	30	56	4	16	7	5	3	5	10	2	0	52	3	12	5	2	5	5	15	0	47	10	16	1	19	2	22	30	15	115	2	8	18
LOC116915569	3	9	2	0	2	4	18	16	23	77	0	0	13	5	17	1	40	76	0	3	1	7	3	3	3	1	12	33	2	5	1	2	4	13	10	1	38	0	4	3	15	0	5	19	2	48	0	4	1
LOC116915573	7	3	4	0	4	1	15	11	6	51	0	0	4	0	5	0	11	20	2	0	0	2	0	1	0	0	0	5	0	4	1	0	1	6	13	0	25	0	1	0	17	0	4	13	2	37	0	1	5
LOC116915576	1	2	3	0	0	0	0	0	0	6	0	0	1	0	0	0	0	1	0	2	0	0	0	0	0	0	0	2	0	1	2	5	0	0	0	0	8	1	0	0	2	0	0	0	0	3	0	0	2
LOC116915582	1	8	10	7	0	2	5	0	7	40	2	5	2	0	1	1	16	27	12	7	8	0	1	1	1	0	0	30	6	26	16	3	1	9	7	0	68	9	22	12	7	5	14	7	3	79	0	12	8
LOC116915584	3	0	0	0	0	0	0	1	1	5	0	0	1	1	1	0	1	4	0	2	0	0	0	0	1	0	0	3	0	0	0	0	1	1	1	0	3	0	0	0	0	0	0	2	0	2	0	0	0
LOC116915585	555	234	118	49	113	333	618	906	449	3375	21	26	457	123	587	71	1120	2405	45	118	26	115	54	81	227	27	153	846	64	249	98	73	132	376	719	33	1744	51	142	134	665	30	395	1064	265	2746	56	36	133
LOC116915586	3	2	2	0	0	0	2	0	0	9	0	0	0	0	0	0	1	1	0	0	0	0	0	0	1	0	0	1	0	2	1	0	4	1	12	0	20	0	0	1	4	0	2	1	0	8	4	0	3
LOC116915588	5	0	0	0	0	0	0	0	0	5	0	0	0	1	1	0	2	4	0	3	0	0	0	0	0	0	0	3	0	0	0	0	5	0	1	0	6	0	3	0	3	0	1	3	0	10	0	1	0
LOC116915589	28	30	8	9	9	20	16	7	55	182	1	2	29	14	38	13	36	133	5	2	3	18	8	12	23	3	14	88	4	18	13	8	14	15	27	8	107	3	20	7	24	7	80	23	31	195	2	4	13
LOC116915590	9	2	5	1	0	1	2	1	0	21	1	0	3	0	0	0	0	4	1	3	2	1	0	1	0	0	0	8	0	3	4	0	0	0	2	0	9	1	9	0	8	0	1	1	0	20	4	4	2
LOC116915591	0	1	0	0	0	0	1	0	0	2	0	0	0	0	0	0	0	0	1	1	0	0	0	2	0	0	0	4	1	1	3	0	0	0	0	0	5	0	0	0	1	0	0	0	0	1	0	0	1
LOC116915601	0	0	5	0	2	2	1	2	4	16	0	0	5	0	2	0	3	10	0	3	0	1	0	0	2	0	1	7	0	3	1	0	0	0	2	0	6	1	1	1	1	0	2	1	0	7	0	0	1
LOC116915602	359	250	118	45	31	167	244	247	232	1693	41	19	246	131	324	73	222	1056	51	82	36	75	32	54	132	59	77	598	66	210	106	53	100	258	285	17	1095	20	138	69	208	35	295	320	100	1185	71	47	182
LOC116915603	20	5	0	0	22	7	10	18	0	82	0	0	36	0	9	0	16	61	0	2	0	5	0	2	2	0	0	11	0	0	1	1	36	4	14	0	56	0	3	19	12	0	8	40	2	84	0	0	6
LOC116915604	116	103	86	14	44	93	73	79	86	694	18	16	109	94	78	22	85	422	66	46	26	34	22	30	52	50	34	360	27	161	66	41	50	93	82	12	532	8	54	50	78	21	63	81	82	437	20	8	85
LOC116915605	22	12	10	0	5	9	10	11	5	84	3	1	21	0	16	2	22	65	2	8	0	6	2	5	12	2	0	37	5	25	5	0	8	15	21	0	79	3	17	8	24	2	7	37	2	100	2	4	19
LOC116915606	2	0	1	0	0	1	3	4	0	11	0	0	2	0	0	0	2	4	0	0	0	0	0	0	1	0	0	1	1	0	2	0	1	2	2	0	8	1	0	0	4	0	0	1	0	6	1	1	2
LOC116915607	69	45	54	12	27	13	15	29	13	277	7	3	49	11	13	9	11	103	10	37	9	10	5	12	8	8	1	100	8	59	39	18	27	32	38	0	221	7	35	42	41	2	33	51	10	221	14	3	70
LOC116915608	383	173	139	24	85	138	280	303	191	1716	9	12	285	63	229	31	337	966	41	78	28	85	31	39	80	26	48	456	67	153	89	40	83	161	301	14	908	25	118	110	253	17	197	473	77	1270	64	65	176
LOC116915610	761	543	380	110	200	375	631	681	409	4090	62	69	630	244	497	70	899	2471	87	313	100	168	74	158	223	61	143	1327	170	683	338	151	274	381	730	31	2758	113	312	257	819	71	535	885	254	3246	133	86	447
LOC116915611	116	49	39	15	41	84	189	247	77	857	5	1	145	26	114	18	218	527	13	29	20	39	9	15	21	5	28	179	22	73	21	16	63	93	156	17	461	11	36	44	102	9	91	305	29	627	6	11	65
LOC116915612	120	64	29	8	7	18	45	61	20	372	7	7	58	6	47	6	85	216	5	13	8	33	4	13	19	5	27	127	13	44	39	18	19	37	65	4	239	12	26	33	86	2	41	123	17	340	1	6	27
LOC116915613	1	2	0	0	0	0	4	4	6	17	0	0	6	1	8	0	20	35	0	0	1	2	0	4	2	0	0	9	0	2	0	0	5	8	9	3	27	0	1	1	0	0	0	15	5	22	0	0	0
LOC116915614	101	94	54	18	35	87	66	101	107	663	8	9	116	65	102	34	93	427	34	44	14	48	14	36	56	39	43	328	27	70	39	41	52	115	105	22	471	14	47	56	106	14	123	139	52	551	23	28	52
LOC116915615	134	101	41	24	41	82	121	159	95	798	15	12	207	67	170	50	268	789	33	38	10	106	34	62	77	40	134	534	18	128	58	71	127	116	188	68	774	23	51	89	95	52	177	353	111	951	6	36	63
LOC116915616	182	103	70	49	67	155	317	329	254	1526	20	6	197	109	425	72	396	1225	41	75	28	74	35	40	151	118	120	682	20	173	77	61	95	393	426	55	1300	19	81	67	210	22	251	500	135	1285	22	14	100
LOC116915617	183	71	36	9	33	72	153	260	59	876	3	8	185	16	132	14	264	622	6	27	4	39	8	24	31	1	16	156	22	73	32	28	35	44	163	1	398	21	52	67	126	10	128	334	38	776	14	5	47
LOC116915618	253	110	79	9	53	123	151	252	94	1124	9	4	160	59	176	17	260	685	15	47	12	44	7	18	81	10	30	264	21	148	62	43	50	158	271	10	763	30	58	48	155	14	130	307	118	860	29	11	93
LOC116915620	11	7	8	3	13	7	9	19	8	85	1	1	12	3	18	5	19	59	8	2	0	13	5	8	5	0	4	45	0	9	13	7	8	6	24	1	68	4	7	9	9	5	25	16	1	76	8	2	10
LOC116915621	9	4	2	0	0	51	129	92	176	463	0	0	48	37	41	16	321	463	2	4	3	6	0	2	60	9	21	107	3	8	1	3	7	147	64	6	239	2	0	15	86	3	166	248	53	573	10	3	3
LOC116915622	145	94	56	23	20	93	179	178	114	902	14	13	113	46	153	27	196	562	13	24	19	41	11	26	65	19	18	236	25	89	39	24	55	125	215	10	582	11	55	38	162	8	162	274	56	766	23	8	56
LOC116915623	29	4	1	2	0	27	8	37	2	110	0	0	3	1	2	3	22	31	0	0	1	1	0	0	2	0	0	4	0	1	0	1	0	6	43	0	51	0	1	0	2	0	2	27	1	33	0	2	1
LOC116915624	209	162	80	42	110	136	439	595	331	2104	8	14	534	132	640	82	1089	2499	25	69	15	165	49	89	165	58	161	796	14	199	89	131	199	305	624	46	1607	14	87	237	410	20	400	1079	283	2530	17	15	101
LOC116915625	47	18	9	5	5	13	18	25	6	146	4	3	29	8	4	0	3	51	0	14	2	2	3	3	0	2	0	26	7	10	2	3	4	7	17	0	50	0	5	5	23	1	8	23	1	66	0	1	20
LOC116915627	244	343	8	4	0	1576	536	886	460	4057	14	27	5	142	13	133	2445	2779	89	132	6	0	3	6	1096	34	40	1406	47	352	19	13	12	1261	1072	100	2876	9	34	34	104	6	593	1709	808	3297	132	0	1
LOC116915628	7	5	2	2	0	5	8	4	19	52	0	1	14	7	9	0	14	45	0	0	4	2	0	3	10	1	6	26	0	2	0	3	7	10	11	2	35	0	3	7	4	1	13	12	4	44	1	1	3
LOC116915629	305	139	43	54	76	146	444	444	294	1945	15	8	298	131	394	56	635	1537	28	45	30	92	36	51	147	35	115	579	26	162	42	73	109	299	461	55	1227	22	54	113	338	28	273	631	184	1643	21	20	109
LOC116915630	23	22	14	2	2	4	4	12	2	85	0	3	13	3	2	1	10	32	2	2	2	4	0	2	0	1	2	15	0	8	16	5	3	6	7	1	46	0	8	0	6	0	5	15	0	34	1	6	46
LOC116915631	376	105	24	16	22	377	426	251	456	2053	1	6	654	146	238	44	1355	2444	13	13	12	31	3	10	188	23	44	337	10	40	30	30	64	628	334	21	1157	11	7	60	411	19	738	506	160	1912	55	35	39
LOC116915632	135	66	29	8	33	78	140	180	80	749	9	11	145	44	157	21	235	622	10	36	9	33	10	26	55	17	30	226	21	73	23	17	66	135	206	4	545	16	31	77	155	10	132	267	63	751	7	6	74
LOC116915633	35	8	3	6	26	34	92	129	58	391	3	2	65	25	107	9	164	375	0	0	0	16	2	8	27	10	33	96	0	15	11	16	15	53	95	3	208	0	1	18	82	2	60	176	52	391	5	1	7
LOC116915634	3	2	0	0	0	38	34	37	10	124	0	0	8	1	8	0	50	67	0	0	0	4	0	0	9	0	1	14	0	1	0	0	4	9	18	0	32	3	0	7	2	0	9	59	3	83	6	0	0
LOC116915635	209	33	8	6	3	10	78	60	0	407	6	2	53	9	15	2	1	88	4	7	3	2	3	6	3	2	4	34	13	23	8	2	11	6	38	1	102	3	13	10	64	0	6	139	0	235	13	3	32
LOC116915636	136	67	30	7	19	100	90	128	102	679	0	1	113	52	145	22	144	477	19	11	0	25	10	11	56	14	19	165	0	67	14	13	40	95	114	8	351	1	24	56	166	9	144	193	62	655	3	7	42
LOC116915637	88	59	33	10	46	34	65	82	35	452	4	21	87	25	37	19	65	258	12	54	10	42	18	32	24	9	24	225	20	81	19	16	67	47	75	10	335	12	51	29	105	12	59	143	22	433	26	11	61
LOC116915638	259	206	83	23	86	132	284	393	234	1700	18	10	244	98	258	15	428	1071	19	82	12	64	24	56	106	15	41	419	33	185	70	52	112	185	300	9	946	32	130	125	283	24	192	449	88	1323	40	28	175
LOC116915639	10	8	1	6	0	79	169	67	72	412	2	3	59	25	13	1	203	306	0	1	0	1	0	1	6	3	1	13	0	0	2	3	5	156	66	0	232	3	0	6	102	1	45	140	2	299	8	0	3
LOC116915640	534	305	113	66	145	440	747	993	707	4050	28	30	700	358	765	121	1374	3376	81	99	38	203	68	92	275	159	337	1352	56	384	117	91	271	708	794	108	2529	34	118	213	753	49	538	1290	412	3407	71	44	160
LOC116915641	84	18	9	0	6	29	55	66	19	286	0	0	104	17	9	0	47	177	3	3	0	4	1	2	4	1	0	18	0	3	3	2	4	64	49	1	126	0	2	5	53	2	13	48	1	124	3	14	24
LOC116915642	130	38	33	2	10	93	227	254	85	872	11	5	52	52	90	11	196	417	15	33	16	7	6	12	22	18	4	133	19	40	21	7	14	193	169	10	473	6	14	32	124	12	45	265	29	527	15	3	39
LOC116915643	20	15	14	3	4	4	13	11	8	92	0	2	19	4	19	2	8	54	3	11	1	1	4	6	6	12	2	46	9	12	5	5	5	9	18	1	64	1	9	4	21	1	25	23	3	87	6	0	12
LOC116915644	162	110	97	15	49	128	148	190	104	1003	14	10	124	53	110	24	154	489	41	54	16	38	18	49	56	27	32	331	22	147	38	27	38	145	156	8	581	20	58	58	148	22	91	193	48	638	20	25	92
LOC116915645	0	4	0	0	0	1	2	2	3	12	0	1	2	0	3	0	7	13	0	0	0	4	0	0	0	1	1	6	0	0	0	1	0	0	6	0	7	1	2	1	4	0	3	6	1	18	0	0	1
LOC116915646	70	41	28	13	16	35	128	160	67	558	7	3	80	25	109	13	191	428	6	20	9	12	9	19	37	24	21	157	10	42	14	19	38	101	120	8	352	4	16	16	78	11	82	205	40	452	8	9	23
LOC116915647	33	31	1	7	3	31	71	69	68	314	0	0	26	11	146	18	111	312	4	2	0	3	2	5	46	13	6	81	1	29	8	3	10	61	93	3	208	0	6	8	65	2	101	113	29	324	3	5	11
LOC116915648	7	6	8	1	5	6	5	4	3	45	1	1	6	1	5	0	4	18	4	12	2	6	2	7	0	6	6	45	4	14	6	4	0	5	8	0	41	2	9	7	13	0	5	8	5	49	7	3	13
LOC116915649	74	17	52	0	38	22	34	7	7	251	8	14	132	15	9	2	23	203	11	33	7	35	2	22	8	0	2	120	17	48	10	3	24	17	48	3	170	22	24	42	38	8	16	47	4	201	18	9	36
LOC116915650	92	53	27	3	32	52	100	155	49	563	1	1	103	7	69	8	177	366	7	15	2	43	5	15	19	2	5	113	3	51	13	15	51	54	134	0	321	6	27	41	105	3	57	212	30	481	11	4	50
LOC116915651	8	1	4	0	0	0	4	0	0	17	0	2	2	0	1	0	0	5	0	0	7	0	0	0	0	0	0	7	3	2	0	0	0	1	0	0	6	1	0	0	0	1	1	2	0	5	5	2	0
LOC116915653	8	1	2	0	1	8	7	6	8	41	0	0	7	5	2	1	14	29	1	2	3	2	2	1	2	1	1	15	0	3	0	0	1	7	13	0	24	0	1	1	4	1	10	18	6	41	2	4	6
LOC116915654	109	86	49	22	29	76	141	143	142	797	4	4	163	63	155	48	322	759	17	25	10	42	8	10	101	67	55	335	5	100	35	40	63	215	201	9	668	14	38	66	108	13	193	280	124	836	16	27	68
LOC116915655	0	0	0	0	0	9	2	1	0	12	0	1	0	0	1	0	3	5	0	1	0	0	0	1	0	0	0	2	0	0	0	1	1	0	2	0	4	1	1	0	1	0	1	1	1	6	1	0	0
LOC116915656	94	77	39	9	48	28	99	176	45	615	1	1	134	13	94	9	203	455	7	18	3	35	8	36	18	2	17	144	7	65	27	21	85	40	177	2	424	12	42	63	143	4	85	253	32	634	1	7	62
LOC116915657	339	151	73	15	80	197	650	940	252	2697	17	16	303	32	327	16	954	1665	16	40	18	88	18	57	73	7	24	341	26	104	60	46	141	187	694	10	1268	26	68	134	337	15	300	1199	95	2174	14	14	161
LOC116915658	121	49	11	16	25	79	158	214	129	802	5	11	92	45	108	19	220	500	8	29	9	22	11	13	44	27	26	189	21	62	24	18	42	127	164	6	464	7	30	28	120	3	83	261	50	582	9	0	42
LOC116915659	177	143	72	16	69	82	162	239	66	1026	8	16	202	20	151	23	287	707	12	47	14	82	17	56	52	6	12	298	12	94	40	39	110	73	216	3	587	30	99	101	115	7	150	381	52	935	25	21	165
LOC116915664	294	127	73	38	34	218	484	481	272	2021	19	12	296	135	386	43	597	1488	47	36	12	79	18	45	158	70	95	560	32	168	64	66	102	306	450	37	1225	21	45	132	360	42	288	784	171	1843	8	28	97
LOC116915666	821	807	429	66	590	73	119	79	17	3001	66	63	533	21	134	72	1	890	79	326	29	266	66	259	35	4	3	1067	158	553	259	106	316	47	683	4	2126	144	548	364	377	53	74	320	58	1938	76	55	841
LOC116915667	1	1	1	0	8	0	0	0	0	11	0	0	1	0	0	0	0	1	0	0	0	0	0	0	0	0	0	0	0	0	0	0	1	0	1	0	2	0	2	0	1	0	0	0	0	3	0	0	0
LOC116915668	233	108	67	51	65	122	229	227	145	1247	22	7	236	73	159	42	325	864	40	35	14	72	28	52	79	36	55	411	33	153	45	38	93	207	331	35	935	29	50	105	256	38	192	392	118	1180	35	8	82
LOC116915672	205	65	32	14	30	100	208	249	105	1008	14	14	73	39	97	15	209	461	13	50	14	27	10	23	40	12	19	208	25	78	30	11	39	111	163	5	462	15	43	28	163	13	84	225	36	607	10	7	73
LOC116915673	292	195	74	34	101	222	424	460	261	2063	32	14	273	130	306	49	486	1290	61	103	44	75	31	76	111	75	95	671	57	219	101	69	117	306	431	65	1365	39	100	111	334	30	238	603	183	1638	31	28	125
LOC116915674	953	322	167	76	155	617	1485	1618	829	6222	68	47	593	348	985	90	1900	4031	112	139	78	128	67	128	318	124	171	1265	92	469	180	116	158	1179	1401	74	3669	57	185	155	1189	64	651	2102	301	4704	126	40	250
LOC116915675	185	68	62	12	25	86	220	254	231	1143	10	10	135	83	157	45	273	713	50	27	35	37	14	24	69	20	41	317	21	108	48	32	58	278	232	16	793	15	51	53	180	18	151	225	71	764	17	15	87
LOC116915676	926	585	191	84	208	658	1795	2073	996	7516	28	26	1120	325	1577	168	2890	6134	65	187	59	304	85	173	485	61	324	1743	55	510	234	232	466	1179	2364	95	5135	87	226	371	1341	69	1267	2909	550	6820	86	55	414
LOC116915677	251	64	15	1	21	86	106	103	61	708	3	0	75	44	57	6	98	283	13	8	7	23	5	7	38	10	15	126	10	56	20	9	6	121	88	2	312	7	17	26	122	4	54	136	25	391	12	10	59
LOC116915678	172	177	63	39	65	140	228	264	406	1554	13	13	260	107	341	59	310	1103	30	65	16	66	27	47	173	55	57	536	42	151	78	65	104	326	326	26	1118	33	57	61	214	21	314	307	137	1144	28	13	117
LOC116915680	67	3	2	0	4	15	129	140	24	384	0	0	87	2	22	3	292	406	0	2	0	1	0	4	5	0	0	12	2	0	0	0	24	25	85	0	136	0	1	5	40	1	144	227	0	418	2	0	5
LOC116915682	99	140	48	51	87	212	174	189	228	1228	30	18	256	109	87	29	343	872	27	38	33	100	26	75	116	36	25	476	17	77	52	50	69	189	175	1	630	27	72	85	229	27	156	534	87	1217	56	11	70
LOC116915685	0	0	1	0	3	0	1	1	0	6	1	1	0	0	0	0	0	2	0	2	0	0	0	0	0	0	1	3	0	0	0	0	0	0	1	0	1	0	0	1	0	0	0	6	0	7	0	0	0
LOC116915686	0	0	0	0	0	1	0	0	0	1	0	0	0	0	0	0	0	0	0	0	0	2	0	0	0	0	0	2	0	0	0	0	0	0	0	0	0	0	0	0	0	0	0	0	0	0	0	0	0
LOC116915687	77	44	2	4	12	19	58	51	68	335	1	8	49	28	78	12	82	258	18	1	9	8	3	2	24	14	19	98	2	52	3	5	17	53	69	12	213	3	1	17	63	7	41	87	46	265	2	11	28
LOC116915689	63	23	11	0	9	6	14	12	2	140	3	4	13	2	3	1	4	30	6	28	1	1	10	5	2	0	0	53	5	29	11	2	11	11	48	0	117	8	13	12	32	1	1	19	0	86	4	4	23
LOC116915690	3	2	0	0	2	0	5	4	0	16	0	0	0	1	2	0	0	3	0	0	0	0	0	0	0	0	0	0	0	2	0	0	0	3	1	0	6	0	0	0	0	0	1	5	0	6	0	0	0
LOC116915692	1	0	0	0	0	1	0	0	0	2	0	1	1	1	0	0	1	4	0	1	0	0	0	0	0	0	0	1	0	3	0	0	0	0	0	0	3	0	0	0	2	2	0	0	0	4	0	1	0
LOC116915693	253	169	64	26	60	124	178	256	116	1246	7	12	315	37	192	35	411	1009	19	60	24	71	24	54	100	4	39	395	39	120	79	68	161	93	304	6	870	32	93	103	283	16	230	590	96	1443	53	31	170
LOC116915694	13	13	0	0	8	3	16	16	8	77	0	0	39	2	10	1	35	87	2	3	2	5	2	0	7	1	12	34	2	3	2	4	19	5	16	0	51	2	4	8	20	2	9	38	7	90	0	0	9
LOC116915695	1	0	0	1	0	0	0	2	0	4	0	0	2	1	0	0	1	4	0	0	0	0	0	0	0	0	0	0	1	0	0	0	0	0	0	0	1	0	0	0	0	0	0	0	0	0	0	0	0
LOC116915696	17	16	2	1	5	12	21	43	34	151	0	1	41	5	54	15	85	201	4	2	1	8	6	8	15	2	19	65	1	8	4	11	32	19	36	1	112	0	9	15	20	0	28	88	24	184	0	0	2
LOC116915697	1058	277	124	38	15	238	521	584	269	3124	3	5	385	273	184	43	367	1260	71	67	23	61	20	25	101	72	119	559	8	368	55	57	100	534	357	28	1507	8	61	93	574	27	173	485	79	1500	12	36	155
LOC116915699	23	19	13	4	5	18	32	29	27	170	3	2	18	5	31	12	33	104	2	3	2	20	3	13	10	6	7	66	1	14	11	2	5	39	35	4	111	5	1	13	43	1	19	45	14	141	1	2	9
LOC116915700	7	5	0	4	3	6	16	27	24	92	0	0	17	8	22	2	45	94	0	0	0	0	3	8	15	5	6	37	0	12	3	7	7	15	21	2	67	1	0	9	5	0	12	38	7	72	0	3	2
LOC116915701	0	0	0	0	0	0	3	4	3	10	0	0	2	0	4	0	6	12	0	1	0	0	1	2	2	0	0	6	0	0	0	1	0	3	4	0	8	0	0	2	0	2	2	9	8	23	2	2	0
LOC116915702	2	0	3	0	0	0	1	0	0	6	0	0	0	0	0	0	1	1	0	0	0	0	0	0	0	0	0	0	0	0	0	0	0	0	0	0	0	0	0	0	0	0	0	1	0	1	0	0	0
LOC116915703	2	0	0	0	0	0	7	12	1	22	0	0	10	1	7	0	4	22	0	1	0	0	0	0	0	0	4	5	0	0	0	0	0	4	8	0	12	0	0	0	5	0	2	15	3	25	0	1	0
LOC116915706	91	49	9	5	25	37	57	121	24	418	0	3	97	19	55	7	128	309	9	6	3	21	7	8	29	6	20	109	9	31	13	15	40	40	80	9	237	14	12	30	75	3	67	172	35	408	11	7	37
LOC116915711	0	0	0	0	0	0	4	0	0	4	0	0	0	0	0	0	0	0	0	4	0	0	0	0	0	0	0	4	0	0	0	0	0	0	31	0	31	2	0	0	0	4	2	5	0	13	2	5	0
LOC116915714	3	2	1	0	0	0	1	1	1	9	0	0	1	0	0	0	2	3	0	0	0	0	0	0	0	0	0	0	0	2	0	0	1	0	1	0	4	2	5	0	4	0	1	2	0	14	0	0	1
LOC116915716	1	2	1	0	0	1	2	1	0	8	0	0	0	1	1	0	0	2	0	0	0	0	1	0	1	0	0	2	1	1	0	0	0	1	0	0	3	0	0	0	1	0	3	3	0	7	0	0	3
LOC116915718	42	6	21	2	8	4	9	3	2	97	2	3	9	3	1	1	3	22	9	11	1	4	2	3	1	1	0	32	9	32	11	12	11	12	14	2	103	1	17	3	17	3	0	6	1	48	11	5	18
LOC116915720	8	8	1	0	0	4	7	5	0	33	0	0	6	1	2	0	3	12	1	2	2	0	2	1	1	0	2	11	0	2	1	0	1	0	4	0	8	0	7	1	3	0	1	8	0	20	0	0	1
LOC116915724	0	0	0	0	0	0	1	1	0	2	0	0	0	3	1	0	0	4	0	0	0	0	1	3	0	0	0	4	3	2	0	0	0	1	2	0	8	0	0	0	0	0	1	3	0	4	0	1	0
LOC116915726	0	0	0	0	0	0	0	1	3	4	0	0	4	0	2	0	2	8	0	0	1	0	0	0	0	0	0	1	0	0	1	0	0	1	0	0	2	0	0	0	0	1	0	1	0	2	0	1	1
LOC116915730	0	2	0	0	0	0	0	0	0	2	0	0	0	0	1	0	0	1	0	0	0	0	0	0	0	0	0	0	0	1	1	0	1	0	0	0	3	0	0	0	0	0	0	11	0	11	1	1	0
LOC116915732	285	258	159	57	156	183	199	192	169	1658	24	28	427	104	221	64	400	1268	51	131	41	165	37	99	116	37	118	795	52	234	153	81	261	179	281	29	1270	60	166	223	303	50	349	495	177	1823	35	57	275
LOC116915733	285	282	76	96	102	806	559	398	1376	3980	26	11	624	461	868	290	1281	3561	62	47	54	143	38	74	272	311	378	1379	43	131	67	112	246	892	514	134	2139	30	64	217	596	97	1387	738	590	3719	45	113	120
LOC116915734	263	404	73	27	28	1455	666	876	953	4745	14	16	202	242	210	163	1261	2108	137	94	25	18	27	40	907	164	133	1545	43	337	41	41	61	1318	855	96	2792	18	43	83	316	29	818	1254	676	3237	178	29	86
LOC116915735	498	303	72	48	266	179	264	450	266	2346	9	23	1257	143	432	85	1146	3095	29	93	35	309	44	186	277	35	177	1185	47	226	114	132	505	287	780	60	2151	33	139	492	491	65	632	1343	231	3426	24	47	284
LOC116915736	3	50	1	1	2	238	134	136	104	669	0	4	12	18	7	16	566	623	4	17	1	0	0	5	117	10	5	159	1	52	0	2	14	157	163	4	393	3	3	12	63	0	193	399	36	709	5	2	4
LOC116915737	5	1	0	0	0	1	0	2	0	9	0	1	1	0	1	0	2	5	0	0	1	0	0	0	1	0	0	2	3	1	0	0	0	1	1	0	6	2	2	2	1	0	1	1	0	9	0	1	2
LOC116915738	33	20	3	2	3	18	18	20	12	129	0	1	15	7	17	4	29	73	2	6	1	4	3	0	15	4	2	37	4	16	4	3	10	23	23	1	84	2	2	2	34	0	12	24	9	85	3	1	13
LOC116915739	1	2	1	0	0	0	2	1	0	7	0	1	3	1	0	0	6	11	1	1	0	7	0	0	0	0	0	9	1	0	2	1	1	0	3	1	9	1	4	1	3	0	0	1	0	10	0	2	2
LOC116915740	169	76	68	16	47	110	106	149	90	831	13	12	136	51	73	20	107	412	34	36	11	50	15	40	33	26	15	260	16	93	52	21	59	93	106	10	450	12	50	41	127	20	78	146	47	521	19	32	77
LOC116915741	204	163	78	37	54	534	689	518	1316	3593	2	3	477	185	653	189	2922	4431	22	23	24	85	17	39	392	166	187	955	4	94	10	61	119	623	623	46	1580	18	7	189	689	39	1242	1308	609	4101	85	32	63
LOC116915742	583	160	66	45	98	327	527	911	446	3163	9	31	416	117	466	31	1081	2151	17	50	21	115	35	66	176	20	85	585	52	212	59	75	136	297	642	29	1502	21	81	134	639	48	408	968	207	2506	37	32	139
LOC116915743	613	262	75	62	57	459	867	1100	912	4407	26	32	478	158	854	82	1374	3004	21	97	40	131	45	56	394	36	154	974	52	322	97	75	181	534	957	34	2252	55	106	141	581	45	659	1216	325	3128	80	34	156
LOC116915744	3	1	0	0	0	0	4	1	5	14	1	0	3	0	5	0	5	14	0	1	0	1	0	0	8	1	2	13	1	1	0	0	0	5	3	3	13	1	1	4	7	0	4	11	0	28	1	0	0
LOC116915746	10	2	2	0	0	5	6	10	4	39	0	0	10	2	14	1	16	43	0	0	1	4	2	6	6	0	7	26	0	6	5	4	11	4	4	0	34	0	5	10	16	1	9	22	3	66	3	0	0
LOC116915747	4	0	0	0	3	5	6	18	2	38	0	2	5	2	16	0	11	36	0	0	0	3	0	0	0	1	1	5	0	5	0	1	0	8	4	0	18	0	0	1	7	0	2	16	8	34	0	0	0
LOC116915748	17	14	7	0	1	25	29	29	29	151	0	2	9	8	12	0	35	66	6	10	3	2	1	3	20	1	1	47	3	18	8	2	9	33	26	0	99	3	9	3	22	1	26	33	12	109	0	2	15
LOC116915750	4	2	0	0	0	10	4	5	0	25	0	0	0	6	0	0	5	11	0	1	0	0	0	0	0	0	0	1	0	3	0	2	0	2	5	0	12	1	0	0	2	0	3	7	0	13	1	0	4
LOC116915751	0	0	0	0	0	0	1	4	1	6	1	0	2	0	3	0	2	8	0	1	0	1	0	0	0	1	1	4	1	0	0	0	0	1	0	1	3	1	0	1	0	0	3	8	3	16	0	0	1
LOC116915752	0	2	0	0	7	6	1	4	1	21	0	0	7	1	2	0	5	15	0	0	1	1	0	1	1	0	2	6	0	2	0	1	16	1	0	0	20	0	2	7	1	0	4	3	2	19	0	3	0
LOC116915753	34	27	7	7	15	21	79	75	98	363	1	2	27	27	73	17	111	258	6	10	10	11	2	10	28	8	25	110	6	25	12	5	16	83	93	14	254	4	13	17	47	9	52	98	40	280	1	7	15
LOC116915754	154	84	59	25	62	92	196	259	150	1081	16	11	199	64	185	31	380	886	34	60	20	45	23	30	82	22	55	371	41	122	59	32	72	151	249	18	744	32	66	84	214	24	148	340	71	979	34	31	78
LOC116915756	5	2	5	0	0	0	1	0	2	15	0	1	0	0	0	0	1	2	0	0	0	0	0	0	0	0	0	0	0	0	2	0	0	0	0	0	2	0	2	0	5	0	0	2	0	9	0	0	3
LOC116915757	7	1	0	0	0	2	1	7	1	19	0	0	3	0	9	0	2	14	1	1	0	0	0	3	1	2	2	10	0	0	0	1	0	3	2	0	6	0	0	3	1	0	0	6	0	10	0	1	1
LOC116915759	20	45	1	3	1	91	105	83	81	430	1	3	15	7	47	15	301	389	2	13	1	5	0	4	76	0	3	104	5	39	4	3	2	42	123	2	220	2	8	12	49	0	203	265	54	593	7	9	7
LOC116915761	204	180	113	31	62	146	199	198	429	1562	26	30	186	155	171	32	313	913	80	109	41	82	25	46	109	70	98	660	64	169	108	30	77	259	202	30	939	33	94	77	223	27	185	214	119	972	46	46	105
LOC116915762	16	7	5	2	0	12	50	41	19	152	1	4	2	6	19	0	48	80	4	2	1	4	1	3	7	2	2	26	1	6	1	1	3	35	31	0	78	1	2	3	18	3	14	47	5	93	0	2	7
LOC116915763	1096	618	255	74	127	567	1015	987	1113	5852	57	76	858	402	893	180	1021	3487	121	199	94	229	82	160	342	125	185	1537	127	693	271	166	325	1003	1091	38	3714	117	353	197	939	113	1061	1102	361	4243	121	103	410
LOC116915764	207	87	97	41	53	77	243	260	166	1231	21	13	174	68	225	31	346	878	20	32	25	61	37	36	109	26	64	410	14	118	67	31	64	174	248	21	737	19	49	66	198	22	168	414	80	1016	19	15	99
LOC116915765	597	302	129	44	71	225	467	419	375	2629	20	17	356	183	331	46	362	1315	67	47	25	55	21	46	181	64	65	571	44	392	97	63	136	465	383	38	1618	14	97	109	357	25	323	536	89	1550	25	13	199
LOC116915766	574	177	65	33	153	196	354	618	266	2436	18	14	465	94	391	73	847	1902	28	67	20	161	45	88	130	16	114	669	29	178	72	130	168	292	751	57	1677	29	83	132	512	23	406	936	194	2315	14	26	155
LOC116915767	72	76	36	24	39	42	121	136	87	633	8	14	133	36	93	25	194	503	17	26	6	44	14	23	42	11	57	240	12	71	31	30	56	87	155	25	467	21	43	53	83	10	90	254	41	595	6	18	73
LOC116915768	0	0	0	1	0	0	0	1	0	2	0	0	2	0	2	0	0	4	0	2	0	0	0	0	0	0	0	2	1	1	5	0	0	0	0	0	7	1	0	2	4	0	1	0	0	8	0	0	1
LOC116915769	408	309	115	62	54	339	435	451	285	2458	37	22	385	222	321	86	345	1418	79	87	31	86	36	70	169	91	67	716	45	254	116	92	105	449	468	53	1582	34	128	86	443	45	373	536	150	1795	41	50	194
LOC116915771	209	94	51	18	55	162	321	447	180	1537	19	23	254	56	224	11	467	1054	37	38	7	37	11	26	47	12	32	247	22	111	35	20	71	235	237	38	769	15	65	76	195	11	118	550	54	1084	24	18	72
LOC116915772	223	184	84	43	125	116	182	215	119	1291	17	18	273	93	215	38	337	991	15	72	3	103	32	56	101	35	80	497	22	224	89	78	114	166	271	26	990	37	81	151	218	39	175	405	140	1246	39	22	156
LOC116915773	199	143	82	41	64	73	183	147	137	1069	42	30	154	89	161	54	142	672	57	56	23	46	19	41	61	110	83	496	35	197	58	25	86	192	161	39	793	23	92	45	143	25	100	190	104	722	49	27	148
LOC116915774	6515	3361	1204	444	1476	3927	7017	9913	4907	38764	327	286	6804	1621	7445	705	13711	30899	511	955	408	1512	395	1153	2785	586	941	9246	670	3234	1214	882	2235	5621	11635	252	25743	631	1303	2496	7761	341	6926	15937	2240	37635	817	404	2131
LOC116915776	423	219	106	20	91	185	290	483	166	1983	22	16	295	68	319	32	618	1370	27	85	45	80	38	72	107	15	62	531	39	233	92	55	91	202	485	9	1206	44	129	153	378	23	254	715	145	1841	21	30	146
LOC116915777	64	41	34	18	21	23	40	35	38	314	10	5	54	44	25	19	56	213	33	35	14	26	11	22	30	24	19	214	27	83	41	17	22	59	63	13	325	14	46	41	64	8	56	54	33	316	32	6	56
LOC116915778	312	225	103	37	59	202	281	379	357	1955	21	18	326	138	439	49	392	1383	44	80	15	110	54	65	186	98	105	757	22	369	130	69	127	304	452	27	1500	45	82	91	380	37	360	473	168	1636	40	23	177
LOC116915779	15	13	9	1	1	4	4	5	7	59	0	0	8	2	5	0	6	21	1	13	0	6	0	8	1	2	2	33	2	6	3	2	10	4	5	0	32	1	9	2	10	0	7	10	7	46	2	0	9
LOC116915780	0	0	1	0	0	0	0	0	0	1	0	2	0	0	1	0	1	4	0	0	0	0	0	0	0	0	1	1	0	0	0	0	0	0	1	0	1	0	0	1	0	0	1	0	0	2	0	0	0
LOC116915781	253	160	68	10	36	157	281	323	128	1416	20	11	161	65	159	16	315	747	11	63	26	28	13	24	67	21	18	271	40	161	72	25	33	163	283	2	779	12	63	69	267	10	155	391	61	1028	37	24	137
LOC116915782	140	94	38	2	42	40	97	122	47	622	3	3	142	20	83	9	224	484	4	23	4	51	10	27	41	7	9	176	18	70	33	30	94	54	143	4	446	11	52	76	119	9	79	248	24	618	4	7	101
LOC116915783	83	77	18	23	21	56	65	95	111	549	8	9	101	39	102	18	157	434	7	15	8	36	11	24	48	18	35	202	8	58	17	21	73	82	112	12	383	8	34	49	48	11	124	149	43	466	9	10	41
LOC116915784	260	120	87	10	61	171	255	326	156	1446	22	24	230	69	192	20	313	870	20	59	18	46	23	51	94	33	69	413	23	149	59	43	52	186	362	17	891	42	57	66	278	12	146	488	69	1158	55	11	105
LOC116915786	90	60	28	0	20	29	50	95	23	395	0	1	142	9	47	6	146	351	1	16	8	58	1	17	17	4	7	129	4	40	22	19	63	19	96	0	263	10	26	45	114	1	47	248	23	514	5	5	81
LOC116915787	68	35	16	8	19	33	152	190	114	635	3	3	95	52	162	18	225	558	5	13	0	42	10	23	67	30	54	244	9	47	18	23	37	158	187	15	494	7	21	31	134	14	119	232	71	629	2	4	15
LOC116915788	332	90	32	14	26	161	525	569	322	2071	8	9	253	49	336	25	688	1368	12	22	12	42	18	22	99	18	56	301	22	69	42	38	71	283	584	9	1118	12	36	57	293	10	264	708	112	1492	15	19	55
LOC116915789	7	1	0	0	0	5	2	5	1	21	2	0	2	0	1	1	0	6	1	0	0	0	0	0	0	0	0	1	0	4	2	1	5	2	1	0	15	1	2	0	5	0	2	2	1	13	0	0	1
LOC116915790	43	41	20	2	8	5	12	15	5	151	1	3	21	1	11	1	18	56	1	9	2	19	1	4	6	1	1	44	10	24	10	5	19	5	14	0	87	7	18	19	34	2	16	30	1	127	4	0	45
LOC116915792	8	1	0	0	0	0	3	2	0	14	0	0	4	2	2	0	1	9	0	1	0	0	0	0	1	0	1	3	0	9	0	0	0	3	1	0	13	0	1	0	0	0	1	1	0	3	1	0	2
LOC116915805	128	83	95	15	64	72	106	96	109	768	12	8	105	72	114	34	168	513	20	69	10	30	17	36	59	48	57	346	16	117	83	22	55	124	145	13	575	18	63	60	195	19	136	224	73	788	31	13	63
LOC116915806	65	52	7	2	16	22	59	122	23	368	0	1	121	8	71	3	166	370	0	12	3	22	14	28	29	0	8	116	5	36	16	13	46	23	136	0	275	9	16	38	88	2	59	262	39	513	2	4	38
LOC116915807	26	45	16	0	12	23	11	36	9	178	1	2	12	3	2	3	40	63	4	11	0	0	2	9	16	2	3	47	9	17	22	6	19	10	31	2	116	10	14	5	24	1	16	39	16	125	13	4	27
LOC116915808	306	254	109	36	77	128	165	254	121	1450	5	10	278	31	169	31	297	821	28	75	16	97	26	77	63	9	27	418	42	289	139	78	100	105	290	6	1049	23	134	90	295	22	213	324	85	1186	48	22	230
LOC116915809	2	0	0	0	0	2	2	2	1	9	0	0	1	0	2	0	4	7	0	0	0	1	0	1	2	1	0	5	1	1	1	0	0	1	2	0	6	0	1	0	6	0	0	6	0	13	0	0	0
LOC116915810	377	164	121	70	87	232	427	404	269	2151	56	27	286	209	293	56	455	1382	71	90	43	80	38	63	148	135	115	783	46	263	117	74	96	455	468	56	1575	49	108	135	441	48	280	590	167	1818	80	54	142
LOC116915811	37	58	19	3	19	27	35	49	17	264	2	2	67	11	28	3	52	165	1	13	0	13	4	4	20	2	7	64	2	29	20	10	24	20	54	2	161	3	17	29	52	0	45	101	15	262	4	2	61
LOC116915812	385	201	100	14	82	225	451	618	131	2207	11	19	334	46	263	33	673	1379	12	35	21	74	24	69	86	9	39	369	31	139	84	48	98	153	610	9	1172	35	88	91	387	9	199	972	65	1846	27	25	166
LOC116915813	77	33	9	3	11	53	104	102	63	455	0	2	58	22	75	19	176	352	1	9	1	17	5	3	24	10	11	81	4	36	11	9	21	57	101	12	251	3	12	14	78	3	65	104	29	308	2	2	10
LOC116915814	15	3	8	0	1	14	23	25	12	101	0	0	7	3	15	2	23	50	1	4	0	2	0	3	1	1	1	13	2	7	7	2	5	13	25	4	65	1	1	1	10	4	15	24	8	64	0	0	5
LOC116915815	201	94	58	24	52	66	234	297	200	1226	14	13	169	91	228	28	402	945	41	64	16	84	33	54	72	40	69	473	30	161	51	65	56	197	246	40	846	31	65	78	206	25	159	387	102	1053	22	18	100
LOC116915816	40	20	7	14	11	24	42	76	43	277	1	0	24	24	64	7	52	172	9	7	1	8	10	6	29	22	10	102	5	33	6	11	18	72	45	8	198	0	13	18	56	6	55	53	39	240	8	1	11
LOC116915818	1	3	0	0	0	2	0	0	4	10	0	0	3	2	2	2	3	12	3	1	1	1	1	4	1	1	0	13	2	1	2	1	1	7	1	0	15	0	1	2	2	0	2	5	0	12	0	0	1
LOC116915822	12	5	3	0	6	5	14	32	2	79	0	0	18	0	9	0	24	51	0	4	0	1	0	0	1	0	1	7	1	4	0	2	5	5	26	0	43	0	2	12	16	0	10	42	5	87	0	1	6
LOC116915824	26	5	4	8	2	15	37	37	25	159	1	0	16	10	21	16	51	115	4	2	0	3	1	2	19	14	8	53	1	11	7	5	6	37	40	2	109	2	10	5	24	0	27	60	8	136	5	3	4
LOC116915825	22	34	7	0	4	77	17	67	7	235	3	0	7	4	5	1	38	58	2	5	2	0	0	0	28	1	2	40	5	20	13	8	4	28	70	0	148	0	3	5	5	0	16	108	11	148	9	1	8
LOC116915826	1023	804	75	151	96	2140	707	765	2015	7776	69	10	2686	1497	1285	313	898	6758	105	41	323	334	96	156	290	431	348	2124	124	7	222	233	470	3188	1298	109	5651	6	94	283	1270	306	2501	905	244	5609	132	678	283
LOC116915827	0	3	0	0	2	1	0	1	0	7	0	0	1	0	0	0	2	3	0	0	0	1	0	0	1	0	2	4	0	0	0	0	23	0	1	0	24	0	0	8	2	0	5	0	0	15	0	0	0
LOC116915828	7	12	0	3	1	31	7	8	15	84	1	0	23	3	20	0	8	55	0	0	1	8	0	3	4	1	1	18	0	0	2	0	23	28	22	0	75	0	0	7	5	3	31	16	0	62	0	4	0
LOC116915829	0	0	0	0	0	0	2	3	1	6	0	0	1	0	4	0	0	5	0	0	0	0	0	0	1	0	0	1	0	0	0	0	0	0	0	0	0	0	0	0	1	0	0	1	1	3	0	0	0
LOC116915830	194	35	9	0	23	27	63	50	53	454	1	4	198	13	36	5	106	363	5	10	0	14	3	2	31	5	3	73	4	14	3	6	44	59	83	0	213	2	5	24	100	4	90	104	1	330	1	10	41
LOC116915831	27	45	12	1	7	15	7	10	6	130	2	2	21	11	13	5	7	61	10	3	3	6	1	9	6	0	2	40	6	34	15	5	21	8	11	0	100	6	17	19	27	4	8	6	2	89	8	9	25
LOC116915833	2	1	7	0	0	0	0	2	3	15	0	1	5	0	2	1	3	12	1	2	1	2	0	0	2	0	0	8	1	4	4	4	0	2	9	0	24	1	1	1	6	0	1	7	4	21	0	1	3
LOC116915835	17	8	6	8	4	3	6	6	6	64	2	0	6	3	3	0	3	17	5	7	0	1	0	1	1	4	2	21	0	13	13	0	14	3	9	0	52	1	9	3	15	2	3	4	1	38	1	0	12
LOC116915836	33	3	3	0	2	3	5	12	7	68	0	0	8	10	1	0	2	21	0	4	2	1	2	0	1	0	0	10	0	11	1	0	0	7	15	0	34	0	3	0	16	0	1	24	1	45	5	4	5
LOC116915837	437	300	243	60	161	188	385	555	207	2536	52	27	365	116	353	60	614	1587	28	151	77	147	47	94	141	17	66	768	99	337	135	72	153	168	476	9	1449	88	220	182	378	32	324	585	173	1982	66	49	326
LOC116915838	13	6	0	1	0	9	9	12	3	53	0	0	12	4	2	0	2	20	2	11	0	0	0	1	1	0	0	15	0	6	0	1	3	5	1	0	16	0	1	1	8	1	3	8	0	22	0	0	2
LOC116915840	0	1	0	0	0	0	0	2	0	3	0	0	0	0	1	0	1	2	0	0	0	0	0	0	0	0	0	0	0	0	0	0	0	1	1	0	2	0	1	0	2	0	0	0	0	3	0	0	0
LOC116915841	589	273	205	65	88	437	1038	1031	622	4348	58	51	343	242	497	92	867	2150	69	169	58	79	57	85	183	90	114	904	81	364	165	67	113	734	870	78	2472	76	154	121	579	40	377	1136	212	2695	105	74	206
LOC116915842	0	0	0	0	0	0	0	0	0	0	0	0	0	0	0	0	0	0	0	0	0	0	0	0	0	0	0	0	0	0	0	0	0	0	0	0	0	0	0	0	0	0	0	0	0	0	0	0	0
LOC116915843	4	1	0	0	4	0	2	2	3	16	1	0	6	0	4	0	5	16	0	1	1	0	0	1	0	0	3	6	0	2	1	0	0	2	0	1	6	0	0	2	3	0	0	9	0	14	0	0	0
LOC116915846	14	10	3	1	0	6	11	9	5	59	0	0	8	4	5	3	17	37	0	3	0	2	0	1	2	0	1	9	2	9	1	1	0	7	5	0	25	0	1	3	7	2	4	7	4	28	3	0	3
LOC116915847	156	143	97	111	146	155	385	447	308	1948	27	15	299	225	523	143	512	1744	64	98	34	202	80	119	207	136	331	1271	53	290	86	113	206	409	453	161	1771	35	108	220	337	74	305	570	329	1978	34	25	136
LOC116915848	1	1	0	0	0	0	1	3	2	8	1	0	1	2	2	0	2	8	0	0	0	0	0	0	2	0	0	2	0	0	0	1	0	0	0	0	1	0	0	0	0	0	0	3	0	3	0	0	0
LOC116915850	1575	1294	406	61	946	637	1599	3032	509	10059	24	39	3078	115	1528	86	5095	9965	45	216	40	535	71	440	421	24	54	1846	81	669	307	204	1531	422	4125	14	7353	140	484	1434	1717	37	2020	7700	280	13812	86	48	1185
LOC116915851	1138	529	200	24	112	166	405	377	112	3063	11	22	528	65	104	23	437	1190	61	226	19	80	18	59	59	2	15	539	60	440	127	79	140	141	660	0	1647	40	186	105	651	32	142	807	10	1973	55	71	576
LOC116915852	871	260	85	14	167	404	1124	1452	432	4809	10	17	809	95	482	42	1267	2722	20	60	19	123	17	77	143	38	51	548	31	144	77	57	226	582	1117	21	2255	26	65	233	613	17	456	1810	85	3305	29	20	220
LOC116915853	87	48	18	60	52	82	205	204	289	1045	1	5	146	122	336	54	310	974	30	17	5	63	33	41	116	90	169	564	2	121	24	51	96	225	216	49	784	7	19	78	120	20	202	336	132	914	0	27	15
LOC116915854	1	1	0	1	5	4	20	20	14	66	0	0	13	3	27	2	28	73	0	6	0	1	0	1	6	4	2	20	1	2	0	1	5	10	19	1	39	0	1	7	4	0	9	24	7	52	3	8	0
LOC116915855	5	2	0	0	0	3	5	2	2	19	0	0	2	1	0	0	2	5	0	0	1	1	0	0	0	0	0	2	0	2	2	1	5	1	0	0	11	1	0	0	0	0	6	5	0	12	1	0	5
LOC116915856	337	269	196	54	137	276	327	501	234	2331	45	41	382	129	272	84	447	1400	48	135	56	123	30	125	163	44	65	789	101	307	169	126	214	260	515	9	1701	58	207	141	487	95	302	541	222	2053	118	50	214
LOC116915857	394	310	254	32	105	613	720	707	618	3753	33	47	1119	355	463	101	1339	3457	35	118	98	166	25	102	352	28	83	1007	66	223	189	99	170	512	770	17	2046	92	196	152	529	52	977	1745	301	4044	107	85	216
LOC116915858	446	102	27	11	1	104	387	209	140	1427	2	4	143	47	108	16	219	539	19	13	2	8	7	5	28	11	12	105	5	43	19	20	48	264	497	1	897	3	17	28	222	2	221	559	15	1067	7	8	94
LOC116915859	71	68	56	15	30	38	65	78	22	443	6	12	117	20	61	26	107	349	5	26	7	45	6	31	25	13	17	175	14	46	22	25	50	42	97	2	298	9	47	39	56	3	52	154	33	393	14	5	56
LOC116915860	0	1	0	0	0	0	0	0	0	1	0	0	0	0	0	0	0	0	0	0	0	0	0	0	0	0	0	0	1	0	1	0	0	0	1	0	3	0	0	0	0	0	0	0	0	0	0	0	0
LOC116915861	82	34	0	1	8	22	13	33	1	194	0	0	57	0	12	0	60	129	0	0	1	0	0	5	1	0	3	10	0	29	18	11	9	3	109	1	180	0	2	19	70	0	5	69	1	166	0	3	45
LOC116915862	26	16	11	4	41	3	4	1	0	106	2	0	23	2	3	0	0	30	3	8	2	8	4	9	6	0	0	40	9	13	4	7	13	6	9	2	63	4	21	18	13	3	3	18	0	80	2	5	16
LOC116915864	2487	373	74	13	72	910	2142	2425	842	9338	8	2	2035	243	1371	61	3415	7135	17	12	12	103	29	32	377	13	67	662	2	218	35	71	361	1183	2986	28	4884	10	47	275	2589	22	1609	3749	221	8522	2	13	178
LOC116915865	3	6	0	0	0	0	0	7	0	16	0	0	0	1	0	0	1	2	2	2	0	0	0	0	0	0	0	4	0	1	1	2	0	0	1	0	5	0	0	1	2	0	0	1	0	4	1	0	2
LOC116915866	11	1	0	0	0	1	4	3	1	21	0	0	3	0	0	0	1	4	0	0	0	0	0	2	0	0	0	2	0	0	0	0	0	0	3	0	3	0	0	0	0	0	0	5	0	5	0	0	1
LOC116915869	26	4	1	0	0	3	8	1	3	46	0	1	9	0	2	0	3	15	1	3	0	0	1	0	4	0	2	11	0	3	0	3	0	1	4	0	11	0	5	2	2	0	2	6	1	18	0	4	4
LOC116915870	238	95	70	32	49	145	322	291	320	1562	10	22	216	93	242	52	469	1104	42	67	24	86	27	68	82	34	79	509	20	122	78	59	63	306	291	23	962	20	67	69	209	27	203	398	118	1111	33	19	101
LOC116915871	746	369	145	55	78	440	780	884	857	4354	29	52	609	251	859	103	1587	3490	63	143	67	190	65	97	358	74	220	1277	70	372	144	106	253	657	951	79	2632	57	128	175	1005	69	759	1091	387	3671	84	59	233
LOC116915872	23	8	9	0	5	6	21	43	5	120	0	0	24	2	25	0	32	83	2	5	2	0	0	1	11	2	5	28	0	5	5	2	7	5	67	1	92	0	1	10	13	0	34	101	1	160	0	1	11
LOC116915873	4	0	0	0	0	2	5	1	1	13	0	1	2	0	3	0	1	7	0	0	0	1	0	0	2	0	0	3	0	1	4	0	3	1	6	0	15	0	0	0	0	0	2	1	0	3	0	0	5
LOC116915874	136	150	82	22	76	79	112	161	68	886	14	10	146	58	144	21	246	639	32	61	19	105	22	46	66	19	23	393	24	165	80	53	67	95	164	3	651	34	75	79	159	15	126	248	81	817	28	26	125
LOC116915875	54	16	2	0	6	66	56	62	47	309	4	0	46	36	65	21	72	244	1	1	0	4	2	0	41	15	3	67	2	15	1	4	23	96	75	1	217	0	2	10	84	4	77	93	12	282	0	5	3
LOC116915876	12	1	0	0	0	22	108	52	38	233	0	1	12	7	122	16	25	183	0	0	0	1	1	0	35	6	0	43	1	2	0	2	10	61	161	1	238	1	2	8	51	0	56	77	15	210	0	0	5
LOC116915877	300	200	101	23	62	176	382	408	174	1826	14	25	321	82	301	38	513	1294	21	88	25	67	22	70	135	13	44	485	45	231	86	83	120	223	517	27	1332	49	116	125	329	18	284	784	104	1809	34	27	171
LOC116915878	4	2	1	1	2	9	0	23	0	42	0	0	2	1	0	0	5	8	3	1	0	0	1	1	0	0	0	6	0	4	2	6	2	6	31	0	51	0	2	0	11	0	0	20	0	33	0	0	5
LOC116915879	256	94	41	34	35	163	260	311	182	1376	20	10	194	98	210	36	435	1003	46	65	21	24	16	51	71	28	59	381	25	99	30	34	45	261	271	16	781	16	36	60	278	14	173	300	101	978	19	22	71
LOC116915880	192	125	120	14	156	13	16	19	15	670	11	14	89	21	7	6	9	157	74	137	15	47	25	22	0	2	2	324	41	200	76	26	45	25	71	0	484	33	46	43	152	8	14	11	8	315	39	48	95
LOC116915881	1026	507	477	35	331	83	47	315	38	2859	22	31	274	44	7	18	109	505	92	299	49	115	39	107	9	2	0	712	97	738	262	78	126	114	405	0	1820	172	226	156	668	43	28	163	79	1535	123	79	556
LOC116915882	161	93	56	20	57	95	318	369	283	1452	9	8	132	64	237	25	332	807	25	38	21	66	23	34	98	27	59	391	20	114	57	43	68	199	259	28	788	24	38	58	186	33	186	447	105	1077	25	14	67
LOC116915884	2507	2100	104	1163	1418	1364	2931	3897	2226	17710	26	73	5082	1609	5551	950	7282	20573	473	525	101	2750	804	1403	2227	642	3090	12015	103	3568	1082	1889	2733	2592	4552	954	17473	117	766	2659	3437	790	4065	8349	3382	23565	68	491	601
LOC116915885	132	49	6	1	7	44	9	73	0	321	0	1	21	7	1	1	25	56	0	17	5	3	1	4	3	0	0	33	4	24	25	9	7	32	64	0	165	1	11	10	96	5	1	50	11	185	9	15	44
LOC116915886	159	118	139	21	83	18	23	46	7	614	11	18	93	19	2	4	10	157	37	95	21	24	20	33	0	0	0	230	29	159	122	36	54	24	75	0	499	18	68	50	211	12	8	16	16	399	30	37	130
LOC116915887	531	167	132	22	99	62	41	116	17	1187	3	8	106	21	3	1	39	181	33	61	23	26	19	33	1	2	0	198	12	216	47	27	49	57	172	0	580	41	39	36	294	12	5	60	16	503	27	20	119
LOC116915888	94	7	6	2	0	18	5	45	0	177	0	0	2	1	0	0	26	29	0	6	0	0	0	1	1	0	0	8	1	7	3	3	0	22	37	0	73	2	0	3	5	0	2	28	4	44	1	4	13
LOC116915889	86	33	27	8	21	53	133	95	89	545	5	0	54	47	57	15	85	263	16	8	9	12	6	12	25	24	6	118	5	55	23	9	6	79	99	6	282	5	17	10	61	10	49	131	27	310	12	5	39
LOC116915890	45	50	52	3	66	14	0	4	5	239	0	7	28	12	0	1	2	50	26	47	4	11	7	18	1	0	0	114	6	52	29	7	28	11	18	0	151	11	15	19	56	12	3	3	5	124	18	4	39
LOC116915892	37	33	2	19	13	19	54	66	59	302	0	5	76	14	96	12	147	350	9	9	0	30	7	13	30	6	25	129	4	28	7	15	37	48	74	14	227	1	15	40	46	4	61	138	39	344	1	3	11
LOC116915894	1	0	1	0	0	0	1	1	1	5	0	0	1	1	3	1	9	15	0	0	0	0	0	0	5	1	1	7	0	0	1	1	2	3	2	0	9	0	1	6	4	0	2	10	5	28	0	1	0
LOC116915895	2	0	0	0	0	1	1	5	2	11	0	0	0	0	2	0	2	4	0	0	0	2	1	0	1	0	0	4	0	0	0	0	0	0	1	0	1	0	0	1	0	0	1	2	0	4	6	1	0
LOC116915896	61	83	5	2	4	75	53	72	10	365	0	0	27	8	17	4	43	99	5	7	7	4	8	2	4	1	1	39	6	6	4	3	15	12	73	0	119	3	5	3	123	0	13	102	2	251	2	0	18
LOC116915897	137	58	27	10	18	85	241	322	130	1028	5	7	189	44	214	20	422	901	9	33	9	59	11	23	55	10	37	246	20	68	22	24	81	136	278	14	643	3	36	65	220	6	166	449	77	1022	7	3	45
LOC116915899	63	39	21	13	22	41	65	51	39	354	0	1	76	37	62	22	66	264	20	9	10	22	14	14	18	12	44	163	4	58	18	23	44	52	80	10	289	10	27	28	50	10	57	111	35	328	7	7	27
LOC116915900	138	91	52	10	5	28	24	49	29	426	1	4	74	27	26	6	42	180	7	32	1	1	2	11	8	5	3	70	17	120	82	27	24	30	75	2	377	6	53	24	116	1	25	42	24	291	8	8	110
LOC116915901	187	223	91	27	25	244	163	264	115	1339	3	13	155	58	96	47	383	755	28	56	15	83	17	48	151	20	31	449	19	256	93	50	107	122	166	6	819	22	98	91	196	14	210	386	103	1120	43	13	180
LOC116915902	692	271	98	37	246	411	800	1655	287	4497	10	15	951	85	806	60	1717	3644	22	98	34	134	41	122	215	6	63	735	48	204	99	76	359	313	1107	25	2231	59	122	365	872	23	410	2237	203	4291	46	29	180
LOC116915903	153	50	18	7	9	101	246	269	128	981	3	6	122	26	141	22	330	650	6	26	8	16	12	7	56	14	21	166	11	60	23	13	39	135	218	6	505	8	16	34	110	5	119	330	66	688	16	4	42
LOC116915904	67	45	14	17	27	36	81	129	45	461	4	4	130	12	83	11	242	486	4	16	2	30	4	13	23	4	20	116	7	51	23	23	37	41	112	2	296	14	18	40	109	1	63	202	36	483	8	3	24
LOC116915905	40	19	1	2	5	11	16	38	16	148	1	0	40	7	31	1	57	137	1	17	1	11	2	4	12	0	6	54	3	27	2	6	28	15	44	3	128	1	5	22	18	4	29	40	11	130	7	0	26
LOC116915906	0	0	0	0	0	9	0	1	0	10	0	0	0	0	3	0	1	4	0	0	2	0	0	0	0	0	1	3	0	1	0	1	0	2	0	0	4	0	0	0	0	0	0	0	0	0	0	0	0
LOC116915907	4	3	2	0	5	0	1	3	0	18	0	1	11	0	0	0	6	18	0	0	0	4	0	1	0	0	0	5	0	1	3	1	11	0	2	0	18	1	2	3	1	0	1	9	0	17	0	0	9
LOC116915908	25	23	9	14	17	13	13	16	13	143	2	2	37	8	21	10	32	112	6	16	0	27	6	18	19	2	21	115	2	33	16	10	13	18	38	7	137	8	7	13	28	7	24	13	30	130	18	6	16
LOC116915909	36	25	1	21	33	18	52	82	44	312	0	0	127	18	81	15	192	433	7	2	0	42	7	24	39	2	37	160	1	35	9	29	63	42	91	7	277	1	3	55	67	2	93	204	47	472	1	4	2
LOC116915910	264	98	52	12	51	101	295	313	173	1359	10	9	212	58	239	50	417	995	18	35	8	29	5	31	83	18	16	243	17	84	35	20	73	283	448	15	975	16	42	51	236	8	277	607	65	1302	17	14	109
LOC116915911	145	67	32	16	44	109	216	268	117	1014	7	16	149	65	179	25	254	695	20	38	17	45	15	24	59	21	58	297	13	91	30	30	77	168	222	25	656	15	21	55	210	8	122	314	72	817	25	14	33
LOC116915912	30	13	19	2	7	19	13	10	9	122	1	0	11	8	10	3	17	50	7	2	1	3	1	1	10	1	4	30	7	20	12	7	13	5	16	1	81	6	10	4	33	1	3	8	11	76	8	0	22
LOC116915914	46	33	6	5	9	21	85	100	64	369	0	3	38	32	76	7	151	307	1	7	4	12	2	5	12	11	24	78	5	25	13	11	3	74	62	2	195	1	12	14	76	3	46	116	19	287	10	8	12
LOC116915916	1	0	0	0	0	0	0	1	0	2	0	2	0	0	1	0	1	4	0	0	0	0	0	0	0	1	0	1	1	0	0	0	0	0	0	0	1	0	0	0	0	0	0	3	0	3	1	0	0
LOC116915917	134	106	17	35	56	38	106	170	54	716	0	0	253	14	217	22	313	819	5	27	1	122	16	42	73	11	40	337	9	87	48	72	177	35	237	4	669	12	35	144	189	12	134	614	108	1248	5	13	58
LOC116915918	94	43	25	5	34	32	51	47	51	382	7	6	58	22	63	31	59	246	7	20	8	19	2	20	45	8	9	138	12	46	18	6	26	79	79	0	266	6	16	26	99	11	78	63	24	323	0	12	42
LOC116915919	0	0	1	0	0	1	0	0	1	3	0	0	2	3	0	0	0	5	0	0	1	0	0	0	0	0	0	1	0	0	0	0	0	4	0	0	4	0	3	0	0	0	0	1	0	4	0	0	0
LOC116915920	19	22	6	0	30	10	1	10	7	105	0	2	35	0	8	2	20	67	1	5	0	11	5	14	5	0	3	44	2	8	6	6	17	3	17	0	59	1	31	26	5	2	18	32	8	123	1	1	34
LOC116915921	144	105	34	17	33	60	160	189	118	860	7	7	141	43	141	29	202	570	13	42	8	66	18	33	42	13	46	281	17	103	32	15	38	76	187	12	480	18	65	57	128	12	109	288	70	747	26	14	78
LOC116915922	274	100	28	4	44	99	125	172	48	894	4	3	204	38	71	3	206	529	3	31	13	71	12	33	36	6	5	210	22	114	69	36	63	89	179	3	575	32	51	59	203	11	106	265	17	744	24	18	115
LOC116915923	64	20	24	0	12	15	61	57	5	258	1	2	50	5	53	5	42	158	0	0	0	3	1	2	11	0	2	19	3	16	8	5	10	23	98	0	163	2	10	6	26	2	59	125	7	237	2	1	35
LOC116915925	385	586	181	73	44	327	476	555	274	2901	31	14	1310	287	445	61	136	2284	35	64	171	144	38	75	147	43	46	763	98	128	132	64	220	366	613	17	1638	24	158	118	455	55	624	864	9	2307	54	153	348
LOC116915926	311	196	112	17	92	156	305	442	127	1758	23	19	293	75	167	31	500	1108	25	79	18	61	16	49	66	22	35	371	48	176	88	53	126	158	321	12	982	54	74	99	311	16	156	584	73	1367	40	26	160
LOC116915927	5	4	1	3	0	3	6	8	1	31	0	0	7	0	2	0	3	12	0	3	0	0	0	2	0	3	0	8	3	3	0	0	3	1	4	0	14	2	3	0	2	0	3	7	0	17	0	3	4
LOC116915928	8	9	4	0	0	4	6	5	1	37	0	0	3	1	1	0	7	12	0	1	0	1	0	2	1	0	0	5	1	2	3	2	0	2	7	0	17	0	2	3	7	1	4	10	1	28	0	2	5
LOC116915929	11	4	14	2	5	9	5	4	5	59	3	3	10	1	5	1	7	30	6	12	1	3	2	6	6	0	1	37	7	27	15	5	13	7	11	1	86	4	25	6	4	4	9	3	3	58	9	4	21
LOC116915930	219	149	58	28	125	76	207	349	117	1328	6	9	324	46	231	24	484	1124	19	73	21	109	23	62	87	21	54	469	31	125	40	47	142	161	354	16	916	49	89	117	265	14	206	548	71	1359	27	31	139
LOC116915932	13	3	3	0	4	1	4	5	1	34	1	0	3	0	0	0	6	10	0	0	0	0	0	0	0	0	0	0	0	1	0	0	1	1	4	0	7	0	1	0	0	0	2	14	1	18	0	0	0
LOC116915933	89	38	28	4	30	56	152	152	59	608	7	2	77	38	78	15	172	389	5	14	10	20	7	15	23	11	15	120	13	38	15	22	25	117	140	5	375	7	13	29	82	0	61	222	49	463	15	4	39
LOC116915934	33	16	4	1	3	7	19	50	7	140	0	0	85	24	21	0	7	137	0	1	3	2	0	1	6	0	0	13	1	0	3	1	6	53	24	0	88	0	1	0	36	0	20	23	0	80	1	2	8
LOC116915937	0	0	0	0	0	2	0	0	2	4	0	0	0	1	1	0	0	2	0	1	0	1	4	0	1	0	2	9	0	0	0	0	0	0	0	0	0	0	3	0	2	1	0	5	0	11	2	1	0
LOC116915938	148	117	34	13	16	180	127	147	143	925	6	2	140	127	113	13	237	638	14	13	35	27	10	15	63	27	23	227	18	26	41	19	37	193	134	2	470	6	23	32	177	18	156	218	89	719	36	29	38
LOC116915939	336	166	193	20	202	27	15	39	23	1021	11	15	95	29	6	11	8	175	45	150	11	51	18	43	0	1	1	320	46	291	44	18	57	36	88	0	580	50	74	60	219	17	16	22	17	475	43	40	152
LOC116915940	17	15	6	0	1	4	5	3	0	51	4	0	9	1	4	0	1	19	8	2	0	0	0	0	1	0	0	11	2	14	7	0	0	2	4	0	29	0	4	1	19	2	2	4	1	33	3	0	6
LOC116915941	1	0	0	0	4	0	0	0	0	5	0	1	0	0	0	0	0	1	0	0	0	0	0	0	0	0	0	0	0	0	0	0	0	1	0	0	1	0	4	0	2	0	0	3	0	9	0	0	1
LOC116915944	0	0	0	0	0	0	0	0	0	0	0	0	0	0	0	0	0	0	0	6	0	1	0	0	0	0	0	7	0	3	0	0	3	3	0	0	9	0	0	0	0	0	0	0	0	0	0	0	0
LOC116915946	142	87	46	7	54	45	98	157	45	681	3	5	143	23	103	4	207	488	6	45	8	39	6	34	42	4	16	200	9	77	25	20	60	55	142	15	403	13	46	85	133	9	89	269	28	672	13	6	123
LOC116915947	1	0	2	0	0	1	0	1	0	5	0	0	2	0	0	0	0	2	0	0	0	0	0	0	0	0	0	0	0	1	1	0	0	0	0	0	2	0	0	0	0	0	2	2	0	4	0	0	3
LOC116915948	12	9	9	8	7	0	9	8	5	67	4	1	9	5	17	3	19	58	6	7	2	4	2	4	3	0	5	33	2	14	11	6	16	11	18	3	81	0	5	6	9	1	11	17	7	56	2	1	9
LOC116915949	127	173	175	89	69	115	149	185	183	1265	60	53	160	115	173	39	246	846	117	166	46	72	42	85	111	50	89	778	70	202	189	66	94	249	226	34	1130	49	163	94	236	34	150	247	195	1168	39	43	137
LOC116915951	4	2	0	0	2	2	0	6	0	16	0	2	5	0	4	0	5	16	0	1	0	1	0	1	1	0	0	4	0	1	1	1	2	1	10	0	16	0	1	7	2	1	4	6	2	23	1	1	0
LOC116915953	12	6	8	8	2	13	27	30	33	139	2	0	16	10	25	2	40	95	2	0	1	0	2	4	12	4	17	42	3	6	7	5	15	18	37	3	94	3	6	6	24	4	27	49	13	132	8	0	1
LOC116915955	225	177	92	41	46	106	212	303	252	1454	14	25	179	137	303	36	301	995	30	85	32	97	18	68	107	66	95	598	43	207	67	54	89	214	284	17	975	38	64	90	240	28	168	367	134	1129	55	24	124
LOC116915956	12	1	0	0	0	4	2	0	1	20	0	0	3	4	1	2	0	10	0	2	0	0	0	0	0	0	0	2	0	2	3	0	0	1	0	0	6	2	0	0	1	1	0	1	0	5	0	0	1
LOC116915957	29	13	9	2	8	8	15	11	12	107	0	2	16	2	8	1	27	56	3	13	1	6	1	6	2	1	1	34	7	12	5	5	11	10	42	0	92	2	6	14	20	4	15	37	5	103	3	0	12
LOC116915958	279	188	106	25	148	91	90	123	64	1114	32	18	180	73	105	24	133	565	59	111	47	61	26	67	43	23	60	497	54	199	134	45	172	78	127	17	826	33	117	128	211	36	82	162	83	852	55	35	203
LOC116915959	1723	1115	569	231	387	1037	1778	1829	1208	9877	214	57	1263	784	901	244	1115	4578	282	461	142	402	182	271	415	397	409	2961	214	1113	441	305	537	2176	1811	146	6743	172	390	471	1614	181	1154	1760	487	6229	181	209	801
LOC116915960	29	14	6	6	15	28	75	74	72	319	2	0	62	60	113	19	150	406	5	8	4	26	3	5	36	40	49	176	0	35	4	13	36	88	111	19	306	0	5	30	60	14	59	128	81	377	0	0	4
LOC116915961	125	54	19	7	19	55	109	218	56	662	8	2	111	21	105	14	228	489	8	17	3	20	7	20	40	2	19	136	16	45	24	14	27	43	126	6	301	17	18	33	115	9	75	189	44	500	2	7	46
LOC116915962	40	20	9	3	17	22	68	75	27	281	2	7	53	7	37	1	96	203	4	12	1	8	2	11	6	1	5	50	3	16	10	4	27	23	62	5	150	4	8	25	38	0	32	144	14	265	7	5	15
LOC116915963	521	292	199	38	91	249	523	649	383	2945	42	46	427	149	387	40	753	1844	70	139	80	124	35	96	143	38	76	801	98	341	156	93	165	444	671	38	2006	67	209	135	436	24	405	931	165	2372	69	36	321
LOC116915964	135	83	41	10	12	46	165	210	81	783	14	2	96	36	169	13	269	599	10	23	9	21	18	21	34	10	26	172	5	81	40	20	40	91	178	7	462	18	66	29	143	0	96	298	30	680	22	8	50
LOC116915965	179	97	79	29	48	85	174	212	207	1110	9	5	121	61	187	23	267	673	24	76	20	56	23	32	82	25	66	404	22	143	62	36	77	115	173	21	649	27	75	53	169	13	132	240	93	802	28	6	111
LOC116915967	3453	711	161	62	149	1873	4609	6786	1362	19166	15	21	3323	267	2834	107	7307	13874	27	83	27	262	83	126	780	28	139	1555	67	340	128	210	581	1037	5069	22	7454	64	129	471	3101	56	2354	9479	625	16279	58	27	469
LOC116915968	129	45	16	4	15	56	122	182	43	612	8	2	56	16	74	4	158	318	6	14	3	15	1	11	24	0	3	77	19	25	11	13	19	79	141	4	311	2	13	20	76	4	49	221	18	403	5	1	18
LOC116915971	185	104	40	20	61	77	184	300	114	1085	9	2	295	34	259	29	503	1131	20	34	7	100	22	57	107	12	64	423	21	94	64	63	116	104	352	21	835	20	81	103	282	20	236	610	95	1447	20	11	107
LOC116915972	266	153	88	20	65	154	278	302	165	1491	16	20	236	84	279	36	303	974	31	58	18	78	20	60	102	28	63	458	38	174	76	70	120	208	307	26	1019	34	85	118	216	22	275	444	85	1279	38	13	118
LOC116915973	175	95	33	20	27	125	317	300	194	1286	9	8	133	51	214	34	380	829	27	38	10	29	9	27	98	10	33	281	15	87	20	30	38	244	306	8	748	10	40	41	160	12	138	383	57	841	15	7	75
LOC116915974	41	14	4	0	0	7	4	7	3	80	0	0	15	3	2	0	2	22	1	0	0	0	1	1	1	0	4	8	0	9	2	0	1	10	3	0	25	1	3	0	13	0	0	14	2	33	2	2	12
LOC116915975	12	25	2	19	13	8	27	19	33	158	0	4	34	20	45	18	48	169	13	12	1	36	18	14	20	28	74	216	4	44	23	26	21	48	48	26	240	2	5	16	33	19	30	62	48	215	5	4	6
LOC116915977	2	0	0	0	0	1	1	0	0	4	0	0	0	1	1	0	0	2	2	0	0	0	0	0	0	2	0	4	1	0	0	0	0	0	3	0	4	1	0	0	1	0	2	2	0	6	7	2	2
LOC116915978	249	142	88	24	41	122	210	307	132	1315	7	11	206	40	223	18	404	909	8	68	9	63	17	53	79	15	32	344	26	168	66	36	71	112	279	11	769	21	74	87	249	14	179	459	107	1190	24	21	150
LOC116915979	127	75	30	4	25	100	141	170	24	696	4	8	47	25	27	13	88	212	6	15	14	17	2	10	20	1	4	89	13	43	26	16	23	44	140	2	307	7	37	20	46	3	46	206	22	387	12	7	40
LOC116915982	72	43	31	8	8	60	142	174	67	605	3	4	102	27	125	10	175	446	0	7	9	13	5	8	25	6	30	103	10	49	14	8	29	78	149	12	349	4	18	31	122	0	67	212	35	489	9	2	26
LOC116915984	242	104	64	21	14	126	180	277	63	1091	3	7	253	38	109	12	251	673	10	32	7	37	10	23	38	6	9	172	14	82	30	23	59	71	169	0	448	10	45	69	196	14	103	351	36	824	7	9	85
LOC116915986	0	1	0	0	2	0	3	5	2	13	0	0	3	2	2	1	1	9	0	2	0	1	0	0	4	0	0	7	0	0	0	0	1	2	6	0	9	0	0	0	2	0	11	15	0	28	0	1	1
LOC116915987	555	288	84	42	150	248	522	691	359	2939	27	23	570	96	445	50	1079	2290	27	68	17	107	37	72	181	10	101	620	44	188	105	53	185	409	908	25	1917	50	111	170	534	24	449	1065	194	2597	52	27	216
LOC116915988	108	68	30	15	37	45	90	118	47	558	2	2	140	27	131	21	208	531	13	27	0	52	4	25	30	11	30	192	12	65	36	27	58	59	156	5	418	21	31	58	138	10	125	279	48	710	6	9	61
LOC116915989	3038	795	126	114	158	1476	4182	3740	3127	16756	13	29	2639	1240	5532	1061	2628	13142	186	92	81	270	97	122	2058	1252	292	4450	26	712	170	249	786	6400	4966	461	13770	32	133	394	3246	125	5097	4020	622	13669	46	72	328
LOC116915990	604	481	434	85	208	200	252	258	212	2734	111	79	446	121	228	80	326	1391	152	285	92	171	80	160	148	58	90	1236	167	572	340	152	258	233	394	29	2145	138	389	172	481	89	315	456	213	2253	209	136	500
LOC116915991	14	14	2	0	3	4	13	22	6	78	1	0	17	1	25	2	31	77	0	3	2	8	0	3	6	0	0	22	0	5	3	8	2	9	31	1	59	3	5	12	12	2	16	38	3	91	2	0	3
LOC116915992	543	397	208	78	141	279	503	573	549	3271	38	52	519	190	515	97	908	2319	83	186	56	197	83	121	309	69	167	1271	78	479	210	139	208	479	609	55	2257	72	228	189	455	72	540	817	333	2706	88	62	276
LOC116915993	343	241	145	29	105	125	272	389	138	1787	12	19	312	34	237	42	501	1157	23	83	29	63	20	79	64	28	28	417	40	189	113	64	130	129	397	17	1079	52	137	126	250	24	254	529	59	1431	21	32	278
LOC116915994	333	234	89	41	80	203	430	742	232	2384	6	13	409	72	434	37	1055	2026	27	75	19	108	35	95	114	19	53	545	20	169	88	54	152	215	788	19	1505	51	70	165	496	17	373	1251	145	2568	35	7	215
LOC116915995	986	254	88	38	102	479	923	1085	531	4486	25	35	697	188	545	88	1187	2765	71	75	20	118	41	54	236	69	57	741	54	239	94	72	231	624	981	22	2317	27	74	153	705	43	564	1340	186	3092	33	31	211
LOC116915996	189	137	84	46	63	101	201	262	233	1316	8	13	219	143	296	59	339	1077	43	63	17	102	50	46	130	63	140	654	21	200	77	84	110	257	296	45	1090	14	79	105	184	21	215	393	190	1201	48	8	96
LOC116915997	0	0	0	0	0	0	1	0	0	1	0	0	0	0	0	0	0	0	0	1	0	1	0	0	3	0	0	5	0	0	0	0	0	0	2	1	3	0	0	0	0	0	1	2	0	3	0	1	1
LOC116915998	79	73	35	8	39	27	56	74	48	439	8	14	59	14	34	5	89	223	6	40	10	41	8	26	18	8	22	179	24	60	31	15	27	32	67	1	257	9	42	27	107	8	47	75	38	353	21	26	59
LOC116916000	0	0	1	0	0	0	2	0	2	5	0	1	2	2	0	0	1	6	0	0	0	0	0	0	0	0	0	0	0	0	0	0	0	0	2	0	2	0	2	0	1	0	1	1	2	7	0	0	0
LOC116916001	216	127	93	18	105	107	281	331	142	1420	15	16	267	44	199	26	435	1002	26	78	24	84	16	59	58	6	42	393	25	138	68	52	116	145	281	9	834	31	101	127	216	15	164	455	61	1170	24	15	185
LOC116916002	1433	1539	221	47	1386	182	464	1341	219	6832	4	12	5567	29	1403	102	4323	11440	12	109	10	1130	49	678	533	5	61	2587	45	389	292	506	2533	174	3665	5	7609	162	545	2540	1354	24	2952	6490	311	14378	34	26	1403
LOC116916003	189	64	70	3	62	89	204	270	247	1198	19	10	116	52	236	16	467	916	13	45	19	30	12	22	73	16	45	275	22	112	48	22	81	175	278	7	745	15	41	31	183	13	174	258	93	808	45	10	85
LOC116916004	101	42	28	1	14	78	96	86	17	463	0	6	58	3	22	4	78	171	7	9	7	12	5	19	6	0	0	65	15	42	13	15	19	27	93	0	224	5	31	10	126	7	32	148	5	364	7	6	58
LOC116916007	1	0	0	0	0	2	0	0	4	7	0	0	0	1	0	0	0	1	0	0	4	0	0	0	1	0	0	5	1	1	0	0	0	0	1	0	3	0	0	0	0	0	1	1	1	3	4	2	0
LOC116916008	0	0	1	0	0	1	0	3	0	5	0	0	0	1	1	0	2	4	0	0	0	0	0	0	0	0	0	0	0	0	0	0	0	1	0	0	1	0	1	0	0	1	0	1	0	3	0	0	0
LOC116916009	88	32	16	3	3	38	62	83	36	361	4	0	53	25	43	14	49	188	13	9	4	10	4	4	20	9	7	80	3	55	10	6	16	74	61	13	238	4	22	11	55	8	43	76	19	238	1	10	30
LOC116916011	2	0	2	0	0	2	3	0	1	10	1	0	0	0	1	0	1	3	0	0	0	0	0	2	1	0	1	4	0	1	3	2	0	5	0	0	11	0	1	0	3	1	0	8	0	13	0	0	0
LOC116916012	260	236	60	40	72	385	364	519	384	2320	11	20	276	160	435	68	740	1710	52	62	13	116	28	28	292	50	223	864	21	275	79	108	163	511	646	80	1883	12	74	110	371	17	360	702	263	1909	26	15	97
LOC116916013	157	109	59	20	62	119	178	256	83	1043	10	7	215	43	173	12	315	775	20	38	16	66	12	49	66	21	46	334	13	93	42	35	114	83	247	11	638	15	51	93	209	14	141	472	76	1071	10	9	74
LOC116916014	2085	1618	488	248	892	726	1787	3850	740	12434	24	45	3354	235	2604	283	5214	11759	131	349	59	1344	238	799	976	42	489	4427	142	1263	623	851	1667	804	3714	166	9230	206	649	1480	2465	173	2497	6390	1073	14933	126	170	1026
LOC116916015	179	149	103	69	73	92	109	93	132	999	26	27	190	123	173	76	121	736	82	74	31	134	43	85	106	146	184	885	41	251	99	93	114	173	151	85	1007	31	96	94	193	32	128	235	110	919	52	40	132
LOC116916016	157	144	78	20	50	74	124	149	73	869	11	16	116	44	134	15	194	530	24	56	20	40	19	50	42	7	41	299	36	146	47	57	60	51	167	24	588	23	72	68	158	18	86	258	51	734	23	16	98
LOC116916017	936	514	291	97	199	538	1100	1355	541	5571	57	40	779	362	937	122	1316	3613	104	186	100	205	56	146	407	144	205	1553	116	677	331	137	328	956	1569	54	4168	120	231	268	1206	63	799	1746	380	4813	140	54	423
LOC116916018	102	46	10	7	90	112	265	562	50	1244	0	5	382	3	259	23	491	1163	1	12	8	42	5	39	114	1	6	228	5	24	16	24	219	74	777	2	1141	5	14	70	209	6	552	1468	37	2361	6	6	22
LOC116916019	187	112	36	48	53	108	259	245	366	1414	27	27	180	169	256	69	244	972	61	63	27	94	21	51	102	135	196	750	32	167	53	70	83	393	232	82	1112	13	65	65	201	68	162	293	161	1028	31	29	54
LOC116916020	520	259	151	121	153	520	1395	1413	1233	5765	41	47	729	543	1285	210	1682	4537	82	130	61	247	90	92	482	268	466	1918	56	352	177	208	236	1461	1478	224	4192	51	184	229	966	60	797	1782	616	4685	72	41	200
LOC116916021	264	201	73	29	118	135	308	531	140	1799	9	12	508	68	287	30	669	1583	15	47	8	127	16	109	98	13	34	467	24	122	68	81	185	143	473	4	1100	28	69	179	360	11	274	926	99	1946	31	8	146
LOC116916022	88	39	16	15	18	38	105	139	37	495	2	3	134	32	107	19	171	468	10	5	2	24	7	32	47	23	26	176	3	41	9	12	56	53	87	18	279	3	7	43	142	10	53	272	37	567	0	1	12
LOC116916023	911	681	345	143	232	655	820	1003	760	5550	61	48	1049	510	605	143	1685	4101	121	314	75	289	122	192	381	176	342	2012	121	764	470	248	386	957	1014	72	4032	148	292	390	1155	79	946	1496	568	5074	161	135	513
LOC116916024	2232	566	274	63	183	773	2019	2800	797	9707	20	28	2690	198	1388	141	3776	8241	34	64	36	265	66	110	523	26	139	1263	40	452	124	173	511	710	3172	29	5211	52	158	355	1829	50	1901	3534	431	8310	23	35	515
LOC116916025	2300	1202	557	218	293	1667	2368	3040	1454	13099	132	68	1482	1053	1474	247	3246	7702	287	467	58	370	131	219	659	461	493	3145	155	1582	643	395	405	2423	2311	193	8107	227	394	457	2791	142	1265	3083	932	9291	285	139	830
LOC116916026	1	3	1	0	0	0	5	1	3	14	0	0	0	0	4	1	6	11	0	1	0	3	0	0	1	0	0	5	0	1	0	0	3	1	4	0	9	0	1	0	3	2	2	7	3	18	0	0	0
LOC116916027	3	2	0	0	0	0	4	2	1	12	1	0	1	2	6	0	4	14	1	0	0	2	0	1	0	0	0	4	1	2	0	0	2	0	4	0	9	0	5	1	7	2	8	4	2	29	0	3	1
LOC116916028	416	326	102	46	62	428	294	380	282	2336	23	10	540	193	327	79	418	1590	52	37	92	108	30	44	116	66	71	616	61	58	75	68	209	462	366	22	1321	11	76	120	355	37	486	540	82	1707	48	151	150
LOC116916029	78	60	17	18	23	42	225	229	61	753	5	5	186	61	106	17	62	442	7	8	8	20	5	11	55	8	11	133	13	32	18	25	23	117	177	12	417	4	21	19	68	3	164	275	30	584	7	9	30
LOC116916030	433	219	123	61	120	436	949	1146	493	3980	19	26	746	191	895	161	1238	3276	29	77	20	174	50	109	366	27	132	984	64	225	104	126	290	370	1270	11	2460	63	118	192	494	31	1016	1994	258	4166	44	37	205
LOC116916031	5	0	1	0	0	0	1	0	1	8	0	0	1	0	0	0	2	3	0	0	0	0	0	2	0	0	0	2	0	0	0	0	0	0	1	0	1	0	0	1	1	0	3	1	0	6	1	0	2
LOC116916032	150	60	36	7	47	120	336	569	120	1445	3	6	269	31	338	26	832	1505	9	14	3	66	7	33	83	7	27	249	21	57	26	36	139	154	576	10	1019	17	56	85	324	6	209	957	90	1744	14	12	81
LOC116916033	125	59	22	43	15	67	189	158	82	760	6	10	103	65	144	20	261	609	14	25	16	45	8	37	56	22	51	274	6	67	28	32	62	150	185	9	539	16	45	61	136	8	90	214	75	645	11	5	48
LOC116916035	91	59	30	22	21	83	170	186	181	843	3	8	110	80	171	15	230	617	14	11	12	58	15	28	72	24	41	275	12	77	34	35	59	184	173	20	594	16	22	63	143	15	119	268	82	728	13	2	31
LOC116916036	214	46	11	0	12	3	17	17	0	320	0	0	82	4	4	1	0	91	6	9	0	17	3	8	8	0	1	52	0	28	5	6	14	5	39	0	97	4	15	19	54	0	1	78	1	172	0	7	94
LOC116916037	28	18	1	6	7	11	64	60	79	274	0	1	56	36	59	10	93	255	12	5	9	16	11	11	29	11	27	131	9	31	10	11	28	54	64	8	215	0	7	39	61	3	48	74	35	267	0	4	6
LOC116916041	5	0	0	0	0	0	6	3	0	14	0	0	2	0	1	0	0	3	1	0	2	0	0	1	0	0	0	4	0	0	2	0	0	6	0	0	8	0	0	0	0	0	0	2	0	2	1	0	0
LOC116916043	0	0	0	0	0	0	0	0	0	0	0	0	0	0	1	0	1	2	0	0	0	0	0	0	0	0	0	0	0	0	0	0	0	0	0	0	0	0	0	0	1	0	0	0	0	1	0	0	0
LOC116916044	20	23	5	5	10	10	35	39	31	178	2	1	24	10	37	10	46	130	4	7	6	10	7	8	9	5	12	68	8	19	9	5	26	20	47	3	137	2	8	13	36	0	26	73	14	172	0	3	17
LOC116916045	333	159	105	11	80	130	367	355	79	1619	21	15	201	62	120	18	143	580	23	59	20	62	9	82	29	11	6	301	37	179	61	25	69	144	320	7	842	30	73	74	208	20	79	459	29	972	54	14	140
LOC116916046	358	227	187	35	55	164	215	276	313	1830	31	32	193	126	200	50	364	996	83	180	45	64	50	86	103	46	50	707	44	267	120	68	111	250	286	14	1160	42	158	95	262	31	257	363	96	1304	46	44	202
LOC116916047	4697	1767	583	215	648	1853	2900	4086	2308	19057	48	49	3806	920	2666	315	5446	13250	221	398	108	709	230	369	1239	140	515	3929	119	1652	531	489	1153	1752	4240	129	10065	93	555	981	3914	179	2937	6287	941	15887	116	149	1289
LOC116916048	828	423	56	15	142	195	703	1310	357	4029	2	21	1064	42	919	41	2423	4512	18	37	15	163	15	107	229	6	64	654	27	191	64	105	294	305	1914	15	2915	46	112	302	568	20	935	3333	152	5468	33	18	313
LOC116916049	14	26	13	1	10	18	6	23	10	121	2	1	9	0	1	1	11	25	5	14	8	0	3	2	29	0	4	65	6	26	20	12	18	10	10	0	102	9	36	1	17	5	9	14	15	106	4	4	23
LOC116916051	9	10	1	0	1	11	2	7	3	44	2	0	8	6	9	2	4	31	1	5	1	5	0	2	13	1	0	28	0	5	3	3	0	4	3	0	18	0	8	5	7	0	6	7	2	35	3	4	8
LOC116916052	69	36	26	6	23	35	97	117	80	489	13	5	77	37	112	8	170	422	7	18	12	26	11	17	24	20	25	160	15	51	19	17	24	85	118	9	338	8	15	25	116	10	46	160	40	420	9	4	39
LOC116916053	108	101	26	9	29	81	211	270	85	920	5	4	147	40	158	14	304	672	5	40	9	78	7	40	42	6	24	251	13	68	40	34	98	130	224	25	632	16	49	73	118	16	169	374	80	895	17	10	59
LOC116916055	128	69	10	19	13	94	196	277	101	907	4	6	124	33	168	15	284	634	9	25	5	27	32	17	35	7	24	181	24	76	26	14	24	98	265	9	536	5	33	44	160	9	103	307	94	755	11	12	40
LOC116916056	159	73	36	15	30	65	162	245	130	915	15	11	146	43	124	26	279	644	8	29	18	22	17	28	62	17	34	235	21	101	34	22	24	119	251	5	577	21	49	25	114	15	133	256	54	667	16	20	68
LOC116916058	43	34	14	2	47	36	20	33	16	245	2	1	51	9	11	9	43	126	4	10	7	18	1	14	14	1	15	84	5	39	32	13	42	20	31	2	184	10	25	33	30	6	25	56	21	206	10	15	30
LOC116916059	387	277	142	61	73	258	376	350	367	2291	52	35	391	194	452	83	325	1532	49	128	32	134	46	95	205	93	134	916	57	352	137	96	107	503	507	64	1823	52	127	142	455	29	454	484	195	1938	63	47	192
LOC116916060	5	2	6	3	0	0	6	1	13	36	0	3	2	1	8	0	4	18	0	3	1	4	1	2	1	1	1	14	0	5	3	1	1	6	6	0	22	1	5	2	8	4	5	7	2	34	8	0	1
LOC116916061	0	0	9	0	5	1	4	6	9	34	0	1	3	1	6	1	6	18	3	8	3	0	0	4	3	0	0	21	3	3	2	0	3	8	6	1	26	0	5	0	5	0	3	8	4	25	0	2	9
LOC116916063	840	413	154	49	186	480	984	1191	438	4735	42	45	884	162	697	57	1581	3468	33	130	58	186	56	89	238	36	83	909	58	326	130	113	262	503	1002	30	2424	51	150	283	735	28	628	1894	257	4026	57	30	285
LOC116916064	1398	432	172	75	142	1041	2091	2392	1562	9305	73	54	939	602	1692	195	2806	6361	111	188	127	178	105	118	624	318	370	2139	130	524	190	156	264	2517	2254	182	6217	84	164	191	1854	93	1204	2769	686	7045	127	58	259
LOC116916065	157	134	79	14	49	84	212	226	107	1062	4	10	132	66	206	26	177	621	17	34	17	33	21	25	66	46	45	304	25	98	59	36	95	211	251	13	788	10	56	57	162	8	129	288	74	784	24	25	72
LOC116916066	231	175	56	29	72	89	154	165	98	1069	14	11	129	90	116	37	114	511	81	48	27	27	21	38	41	34	20	337	23	206	79	35	92	155	181	9	780	7	67	53	277	16	98	218	36	772	32	9	150
LOC116916067	194	147	80	19	26	115	153	130	99	963	19	9	162	73	158	31	155	607	29	64	11	61	16	37	86	47	50	401	12	197	68	52	82	158	207	21	797	18	61	82	207	14	152	222	89	845	28	12	109
LOC116916068	182	121	54	23	52	126	143	130	163	994	22	14	150	102	119	36	120	563	35	59	15	63	28	46	60	54	56	416	31	149	51	41	44	238	186	23	763	13	54	37	201	17	126	204	65	717	50	18	94
LOC116916069	34	19	11	1	10	8	17	12	12	124	3	5	28	0	11	2	19	68	0	15	2	12	7	12	3	0	0	51	0	17	13	4	13	7	31	1	86	3	20	21	17	0	21	19	3	104	9	1	31
LOC116916070	9	0	0	2	0	3	1	4	1	20	0	2	1	2	1	0	2	8	1	1	0	0	0	0	0	1	0	3	2	0	2	1	0	1	2	0	8	0	0	1	0	0	0	9	1	11	0	0	0
LOC116916071	15	10	13	1	6	2	8	8	4	67	1	1	9	1	3	0	15	30	5	3	2	0	1	5	1	5	0	22	0	7	3	2	3	1	7	0	23	2	2	8	7	1	7	11	1	39	4	4	8
LOC116916072	3	2	2	0	2	0	2	2	0	13	0	0	3	0	0	0	0	3	0	1	0	2	0	0	0	0	0	3	0	2	4	2	0	1	0	0	9	0	1	1	0	0	0	4	0	6	4	0	4
LOC116916073	523	173	92	17	60	252	419	602	397	2535	11	12	378	107	378	52	880	1818	29	57	17	102	40	54	170	12	73	554	37	201	73	63	136	284	506	13	1313	29	82	87	593	30	314	709	202	2046	23	32	140
LOC116916078	2	1	3	0	0	0	2	2	0	10	0	2	0	0	0	2	0	4	0	0	2	0	1	0	0	0	0	3	0	2	1	0	0	0	3	0	6	0	2	2	2	0	0	0	4	10	1	0	0
LOC116916079	0	0	0	0	0	1	0	1	0	2	0	0	0	0	1	0	5	6	3	0	0	0	0	0	1	0	0	4	0	1	0	0	0	0	0	0	1	0	0	0	0	0	0	1	0	1	7	0	0
LOC116916080	14	6	6	2	28	10	19	7	17	109	0	1	7	4	31	4	34	81	6	7	3	4	3	5	8	6	0	42	2	15	2	4	24	14	19	2	82	1	7	13	37	4	39	32	4	137	4	2	7
LOC116916081	30	29	2	2	21	17	14	22	5	142	0	1	20	3	11	2	24	61	1	11	1	10	3	9	10	2	0	47	5	15	11	10	17	5	38	0	101	5	7	24	23	3	37	77	4	180	5	3	23
LOC116916082	0	0	0	0	0	0	0	1	0	1	0	0	0	0	0	0	0	0	0	0	0	0	0	0	0	0	0	0	0	0	0	0	0	0	0	0	0	0	0	0	0	0	0	2	0	2	1	0	0
LOC116916084	644	641	347	90	358	409	499	1227	928	5143	52	52	681	172	805	92	1685	3539	86	334	88	274	144	233	253	67	183	1662	83	691	155	134	414	326	710	61	2574	156	261	367	1282	71	500	873	428	3938	128	67	436
LOC116916086	0	0	1	0	0	2	0	0	0	3	0	0	0	0	0	0	0	0	0	0	0	0	0	0	0	0	0	0	0	0	0	0	0	0	0	0	0	0	0	1	0	0	0	0	0	1	0	0	0
LOC116916088	0	0	0	0	0	0	0	0	0	0	0	0	0	0	0	0	0	0	0	0	0	1	0	0	0	0	0	1	2	0	0	0	0	0	1	0	3	2	1	0	0	0	0	1	0	4	0	0	0
LOC116916089	243	234	153	26	168	177	193	439	289	1922	28	17	263	60	283	51	626	1328	43	147	38	107	55	113	103	20	61	687	55	297	71	65	195	119	257	22	1081	74	118	117	442	30	171	321	147	1420	62	30	183
LOC116916092	86	29	13	4	22	44	146	177	67	588	1	8	59	14	86	6	192	366	1	12	4	12	6	16	30	2	17	100	1	26	10	15	22	79	141	1	295	8	13	18	63	5	70	193	39	409	7	7	19
LOC116916093	78	62	3	37	31	57	184	221	253	926	2	3	155	81	290	41	333	905	16	9	5	70	26	24	107	27	125	409	2	73	21	33	74	228	203	30	664	0	18	69	211	7	180	302	155	942	0	11	20
LOC116916094	58	29	10	1	12	16	46	81	11	264	0	0	51	2	32	5	62	152	0	5	2	4	2	7	9	1	2	32	3	17	5	6	15	8	58	1	113	8	6	12	57	0	24	165	3	275	0	2	16
LOC116916096	98	72	19	1	20	159	17	99	7	492	1	5	49	16	1	3	85	160	5	20	4	12	4	21	42	0	1	109	3	46	63	33	31	39	59	0	274	10	35	18	116	2	14	153	14	362	6	5	70
LOC116916097	20	1	1	0	2	4	1	4	0	33	0	0	0	0	1	0	2	3	0	0	1	0	0	0	0	0	0	1	0	0	0	0	0	0	0	0	0	0	2	0	3	0	1	4	0	10	0	0	11
LOC116916098	74	92	70	13	53	6	4	60	1	373	3	7	28	16	0	0	65	119	10	71	14	22	4	10	9	0	7	147	10	31	190	155	160	25	32	0	603	21	131	53	158	3	0	64	62	492	18	23	71
LOC116916100	191	177	186	12	54	16	20	109	3	768	18	22	10	32	1	2	45	130	27	90	29	29	8	18	6	0	7	214	39	72	314	109	84	49	58	0	725	48	200	18	145	10	6	64	69	560	41	26	104
LOC116916101	31	35	22	6	43	2	7	4	0	150	2	4	25	1	0	1	2	35	3	12	1	11	2	8	0	0	0	37	5	19	10	7	20	3	20	0	84	5	22	24	24	7	2	5	1	90	13	2	20
LOC116916103	643	456	264	79	151	312	680	981	466	4032	23	33	738	272	775	105	1240	3186	63	178	33	241	86	202	278	121	186	1388	70	588	190	170	306	539	1023	77	2963	75	257	283	724	58	607	1567	406	3977	55	43	412
LOC116916104	385	216	80	24	95	245	699	1210	250	3204	5	21	580	93	568	33	1100	2400	15	33	17	168	27	113	154	24	43	594	22	110	51	65	224	394	864	28	1758	30	72	193	405	12	425	1390	128	2655	32	11	136
LOC116916105	28	12	3	2	15	23	29	37	14	163	2	0	32	4	16	4	45	103	1	4	1	23	6	11	9	5	6	66	1	28	6	3	20	27	30	2	117	3	7	21	35	2	24	73	19	184	2	2	23
LOC116916106	674	293	92	19	57	208	329	330	311	2313	7	2	350	125	327	42	294	1147	55	48	17	62	28	30	164	16	46	466	14	339	92	56	185	272	386	9	1353	3	91	109	445	37	237	385	86	1393	22	27	187
LOC116916107	379	122	150	24	101	101	272	186	180	1515	55	34	224	60	252	68	279	972	39	80	14	67	22	47	89	40	21	419	48	155	82	40	78	221	372	31	1027	33	125	125	234	23	263	466	68	1337	29	50	186
LOC116916108	8	7	2	0	4	3	5	5	0	34	0	2	6	8	16	2	8	42	5	2	1	7	0	3	4	2	0	24	3	7	4	4	2	6	14	0	40	1	4	1	9	3	13	20	3	54	0	1	7
LOC116916110	35	17	20	4	31	12	12	58	17	206	0	2	41	7	28	7	70	155	3	5	5	12	3	10	12	1	6	57	3	18	11	5	27	18	74	0	156	3	18	26	35	7	35	84	10	218	3	10	29
LOC116916111	84	21	31	5	10	32	110	121	53	467	2	0	73	25	106	21	181	408	5	17	11	33	3	17	32	10	12	140	5	42	24	17	51	78	134	5	356	5	17	39	97	6	75	199	36	474	12	7	39
LOC116916112	248	102	27	0	39	95	39	74	0	624	1	2	125	6	9	4	23	170	10	7	5	36	7	16	4	0	0	85	2	84	32	11	26	11	103	0	269	4	38	72	199	3	7	119	5	447	4	6	143
LOC116916113	16	3	0	0	0	0	2	4	0	25	0	2	3	1	0	0	7	13	1	4	0	0	0	0	2	0	0	7	0	0	1	0	0	0	4	0	5	0	0	0	1	0	0	4	0	5	0	0	1
LOC116916114	289	97	27	23	23	221	569	577	339	2165	10	12	179	117	330	33	558	1239	23	58	15	45	17	30	153	72	71	484	20	92	33	38	82	544	527	33	1369	13	34	51	325	23	257	548	146	1397	24	8	58
LOC116916115	6	2	0	0	0	0	1	0	0	9	0	0	0	2	2	0	0	4	0	1	0	1	0	1	0	0	1	4	1	0	1	1	0	0	0	0	3	0	2	0	4	0	1	1	1	9	2	0	1
LOC116916116	1	0	1	0	10	3	1	0	3	19	0	0	0	0	1	0	1	2	0	3	1	0	1	0	0	0	0	5	3	0	1	1	2	0	6	0	13	0	1	0	3	0	1	8	0	13	0	0	1
LOC116916117	123	97	26	15	52	29	75	86	41	544	9	12	104	42	72	11	104	354	22	46	10	69	20	43	35	18	41	304	20	116	32	33	67	40	99	13	420	23	48	66	109	8	50	201	33	538	26	11	73
LOC116916118	273	136	112	48	109	125	150	147	100	1200	17	20	232	53	156	45	207	730	23	83	14	111	12	81	88	10	50	472	55	165	65	45	159	89	174	11	763	44	88	125	250	25	170	286	97	1085	53	15	148
LOC116916119	42	34	10	2	15	47	58	87	13	308	4	4	86	11	47	5	90	247	7	14	5	26	8	18	12	3	20	113	7	31	12	14	48	28	87	2	229	7	18	44	74	3	29	137	17	329	1	3	42
LOC116916120	360	116	42	9	30	118	242	192	44	1153	13	17	141	25	41	13	217	467	30	40	18	30	12	31	25	2	6	194	32	63	54	15	39	99	173	5	480	56	80	40	138	10	56	382	23	785	33	26	105
LOC116916121	10	2	1	3	6	6	105	94	45	272	0	1	55	12	89	5	170	332	1	3	1	10	4	9	18	2	11	59	0	12	4	6	32	59	134	8	255	1	3	25	22	4	42	185	27	309	1	0	1
LOC116916122	1	0	0	0	1	0	0	0	0	2	0	0	1	1	2	0	4	8	0	1	0	0	1	0	0	2	0	4	2	0	0	0	0	0	0	0	2	0	0	0	0	0	0	2	0	2	0	0	0
LOC116916124	62	44	30	5	25	23	43	53	21	306	7	6	71	9	42	9	107	251	3	24	8	26	9	22	14	2	12	120	8	48	37	13	68	22	98	1	295	7	34	34	52	13	40	131	23	334	13	4	67
LOC116916125	78	30	14	2	36	53	78	117	24	432	1	7	99	11	39	8	141	306	3	14	1	32	5	12	13	0	17	97	4	32	12	14	40	24	85	10	221	10	22	34	53	7	40	194	10	370	11	3	31
LOC116916126	643	397	165	164	199	824	2400	2076	1234	8102	57	70	913	791	1751	386	1189	5157	169	162	53	291	94	211	752	876	567	3175	80	648	241	260	442	2826	2817	381	7695	98	202	366	1300	129	1616	2759	644	7114	140	99	223
LOC116916127	175	146	52	17	39	77	138	146	53	843	4	17	221	32	78	18	211	581	6	28	18	68	17	48	25	8	6	224	26	75	27	30	76	76	204	3	517	35	90	70	150	9	149	373	27	903	15	21	114
LOC116916128	20	9	1	0	1	16	18	34	6	105	1	1	24	6	5	2	51	90	1	4	1	2	2	5	5	2	0	22	3	17	11	6	8	10	23	0	78	8	6	8	21	0	21	45	8	117	3	0	23
LOC116916129	476	310	174	27	118	174	319	455	174	2227	26	23	329	95	233	15	519	1240	31	113	21	107	38	102	98	13	40	563	48	321	140	58	164	157	406	12	1306	44	186	186	353	30	237	534	101	1671	57	43	282
LOC116916130	436	128	100	13	68	315	360	403	157	1980	16	17	632	71	326	32	516	1610	9	54	9	89	9	55	113	10	22	370	22	142	76	67	110	172	532	5	1126	53	90	81	306	12	290	1006	78	1916	33	30	138
LOC116916131	64	39	17	3	17	41	69	137	31	418	2	3	79	10	105	2	211	412	0	23	2	14	8	17	21	2	13	100	13	30	9	18	23	52	146	0	291	11	31	32	96	6	67	203	40	486	1	0	39
LOC116916132	15	4	0	0	1	0	6	3	0	29	0	3	4	3	2	3	4	19	1	2	1	3	1	3	1	0	2	14	1	3	3	0	0	2	2	0	11	1	7	5	7	0	3	7	0	30	5	10	7
LOC116916133	840	455	187	50	99	374	548	550	491	3594	44	36	664	265	537	103	814	2463	107	171	66	143	60	104	274	68	102	1095	100	570	236	132	230	607	704	36	2615	38	219	150	483	74	669	693	219	2545	73	79	381
LOC116916134	164	107	56	11	76	107	254	323	119	1217	15	7	128	29	163	18	426	786	21	42	6	48	12	23	70	2	20	244	31	89	48	22	58	111	347	0	706	22	55	43	198	11	148	555	57	1089	34	18	91
LOC116916135	110	59	41	9	59	63	96	132	93	662	5	8	135	23	115	15	185	486	4	22	23	40	6	40	42	12	34	223	13	50	30	38	62	84	156	30	463	8	59	69	112	20	100	248	41	657	15	15	89
LOC116916136	10	17	5	4	3	8	12	6	13	78	2	2	15	4	10	3	10	46	3	7	1	6	3	3	11	1	3	38	12	19	10	5	3	11	8	6	74	5	6	11	11	4	16	24	5	82	0	1	12
LOC116916137	23	10	8	1	7	12	9	9	11	90	9	0	14	10	15	2	15	65	2	2	2	6	1	2	0	1	1	17	2	6	11	1	1	7	22	1	51	4	7	4	2	0	11	16	5	49	0	8	13
LOC116916138	36	21	6	1	5	39	69	76	24	277	11	1	39	8	51	4	68	182	1	9	4	9	1	5	11	5	4	49	1	12	9	7	14	58	71	5	177	1	12	19	44	0	46	148	23	293	5	0	18
LOC116916139	222	81	71	14	36	115	298	320	198	1355	32	8	158	54	248	41	444	985	16	50	32	42	12	31	65	13	54	315	30	104	42	23	63	200	294	12	768	26	48	57	255	15	164	420	101	1086	15	10	57
LOC116916140	2	0	0	0	0	0	1	1	3	7	0	0	1	0	2	2	1	6	0	0	0	0	0	0	0	0	0	0	0	0	0	0	0	1	1	0	2	0	0	0	1	0	2	4	2	9	0	0	0
LOC116916141	242	201	164	47	80	121	252	318	187	1612	28	27	285	90	237	37	464	1168	37	112	53	78	36	68	74	28	56	542	56	230	141	55	84	169	339	16	1090	47	115	87	276	36	148	441	153	1303	41	30	184
LOC116916142	752	521	147	112	188	306	646	1310	319	4301	33	43	855	98	860	105	1578	3572	41	167	36	227	59	183	399	24	157	1293	84	436	177	189	405	307	1277	20	2895	88	210	326	821	74	890	1531	387	4327	73	62	270
LOC116916143	75	60	23	4	30	57	124	172	40	585	4	1	131	14	73	6	155	384	4	21	2	20	4	25	30	3	11	120	5	34	20	23	38	57	124	9	310	8	49	41	90	9	69	295	13	574	5	4	65
LOC116916144	34	4	3	0	2	36	8	46	0	133	0	1	11	10	0	0	7	29	7	4	0	1	0	0	0	0	0	12	0	28	9	0	1	3	35	0	76	3	3	3	8	0	4	13	0	34	1	1	11
LOC116916146	275	257	38	150	330	201	591	777	427	3046	5	13	1083	181	1112	177	1511	4082	28	66	9	597	124	269	375	23	316	1807	24	475	105	385	628	253	930	45	2845	25	112	515	679	85	727	1435	621	4199	13	25	96
LOC116916147	5	1	0	4	2	3	4	13	3	35	0	0	5	2	6	1	14	28	0	1	0	1	0	1	2	1	2	8	0	4	0	0	1	1	9	5	20	2	1	4	10	0	3	12	0	32	0	0	0
LOC116916148	30	13	33	9	12	10	7	11	3	128	4	1	17	7	7	1	1	38	0	11	0	8	2	13	1	1	1	37	6	26	0	1	14	3	15	0	65	8	2	8	28	1	10	25	1	83	12	2	4
LOC116916149	18	22	7	3	20	11	31	36	38	186	0	4	33	16	41	7	73	174	3	10	2	15	8	12	16	2	19	87	2	17	5	8	19	39	43	5	138	2	9	22	20	1	34	63	20	171	3	2	4
LOC116916151	65	39	9	28	34	50	126	165	174	690	2	3	115	75	175	29	301	700	14	20	1	72	30	33	87	38	129	424	1	59	20	36	40	139	179	23	497	10	15	53	113	26	159	155	114	645	3	9	20
LOC116916152	573	265	156	17	89	304	758	1144	296	3602	23	9	568	80	596	54	1174	2504	32	74	12	77	33	59	176	19	42	524	45	256	112	59	172	320	1079	18	2061	28	126	158	608	35	537	1574	159	3225	45	19	218
LOC116916153	22	12	6	5	3	14	1	4	3	70	1	0	51	4	11	1	14	82	0	1	1	5	2	1	1	0	2	13	2	6	4	2	23	8	9	0	54	0	1	7	6	2	18	17	0	51	1	13	13
LOC116916154	28	17	0	12	17	29	58	67	93	321	0	0	60	29	119	17	147	372	14	2	0	31	10	7	53	38	53	208	4	29	9	21	27	115	82	24	311	0	3	31	44	13	81	109	75	356	8	3	4
LOC116916155	277	233	196	38	94	141	314	309	272	1874	43	27	215	159	301	115	274	1134	97	123	52	86	35	57	160	100	83	793	58	374	150	83	142	317	423	39	1586	54	167	88	287	26	292	352	124	1390	67	58	213
LOC116916156	84	41	37	15	21	86	98	120	68	570	3	11	119	78	107	26	118	462	13	17	16	45	14	27	52	18	69	271	14	127	57	30	48	107	93	11	487	11	34	36	113	9	66	179	70	518	7	6	48
LOC116916157	4	1	0	0	0	2	0	0	1	8	0	0	0	1	3	0	1	5	2	0	0	0	0	0	0	0	0	2	1	2	0	2	1	0	2	0	8	0	1	0	0	0	1	2	0	4	1	1	1
LOC116916158	76	36	6	4	5	34	121	138	32	452	1	2	98	17	85	6	156	365	5	6	7	27	5	12	34	0	14	110	0	27	24	11	36	39	149	1	287	4	24	36	83	6	47	245	21	466	5	2	40
LOC116916159	35	27	9	0	10	14	82	108	21	306	1	0	65	13	33	0	81	193	1	2	0	6	0	5	8	0	1	23	2	22	15	6	18	42	60	0	165	3	5	19	32	1	19	128	9	216	1	1	19
LOC116916160	45	3	0	0	3	9	25	36	7	128	0	0	81	0	30	2	60	173	0	0	1	1	0	1	14	0	0	17	0	0	0	0	12	8	56	0	76	0	0	4	15	0	40	183	0	242	0	1	1
LOC116916161	5	8	2	4	4	0	2	3	4	32	0	1	6	0	0	0	8	15	0	6	1	0	2	1	1	0	2	13	1	3	3	2	4	1	5	0	19	1	5	7	2	0	3	2	2	22	0	0	10
LOC116916162	40	21	12	1	12	25	46	70	36	263	0	7	22	24	42	3	64	162	1	6	7	8	3	2	7	2	9	45	3	17	7	14	15	47	51	3	157	2	13	4	48	5	32	84	19	207	6	1	5
LOC116916163	396	202	93	46	54	241	790	927	498	3247	21	17	409	121	598	57	1067	2290	26	69	35	121	35	74	169	55	97	681	57	208	82	69	119	540	775	37	1887	54	84	108	371	26	402	1026	216	2287	46	20	142
LOC116916164	71	64	23	12	24	33	150	222	82	681	5	13	137	39	173	10	265	642	4	23	0	44	15	31	37	6	40	200	13	77	20	25	54	126	171	6	492	7	32	41	149	8	91	374	44	746	5	3	37
LOC116916165	152	33	14	14	36	119	245	347	223	1183	8	2	83	50	202	17	451	813	18	25	11	22	13	14	72	15	39	229	14	58	13	11	17	230	284	16	643	4	33	19	149	2	122	324	98	751	7	8	34
LOC116916166	9	5	1	0	0	11	11	23	3	63	0	0	21	0	23	0	32	76	0	1	0	6	1	2	3	0	3	16	1	8	0	3	9	6	29	0	56	0	2	5	11	1	13	38	10	80	1	0	3
LOC116916167	98	84	85	25	31	42	51	48	118	582	32	19	96	78	70	23	73	391	62	98	35	43	25	47	40	21	51	422	56	150	91	37	34	120	90	11	589	36	69	37	105	44	118	99	59	567	73	23	93
LOC116916168	0	1	0	0	0	2	1	1	0	5	0	1	1	0	0	0	0	2	0	0	0	0	0	0	1	0	0	1	0	0	1	0	5	0	1	0	7	0	1	0	0	0	1	0	1	3	0	0	0
LOC116916169	252	165	133	45	70	93	142	154	151	1205	35	32	172	100	128	33	166	666	39	105	46	70	28	61	36	47	23	455	75	279	112	50	78	202	210	6	1012	38	100	63	250	22	155	222	70	920	48	47	215
LOC116916170	0	0	1	0	0	14	0	1	0	16	0	0	0	0	0	0	0	0	1	2	0	0	0	0	0	0	1	4	0	0	0	0	0	0	0	0	0	0	0	0	1	0	0	1	0	2	0	0	0
LOC116916171	695	363	188	61	83	686	2188	1926	835	7025	58	40	585	185	927	82	1493	3370	75	145	87	122	46	109	330	54	114	1082	82	393	165	118	133	1310	2358	33	4592	69	192	138	1018	47	908	2324	229	4925	76	41	246
LOC116916173	421	332	162	44	87	272	1117	986	633	4054	27	23	422	161	733	94	739	2199	44	94	34	92	38	85	295	74	77	833	72	312	176	78	133	566	1408	16	2761	44	200	80	482	56	766	1630	230	3488	75	36	224
LOC116916174	6	2	4	0	0	1	0	0	3	16	0	0	4	0	0	0	0	4	0	2	0	1	1	0	1	1	2	8	0	0	3	0	2	3	1	0	9	0	3	2	2	0	2	1	2	12	0	0	2
LOC116916175	1	1	0	0	2	1	1	1	0	7	0	0	0	0	0	0	2	2	0	0	0	0	0	0	0	0	2	2	0	0	0	0	0	1	0	0	1	0	0	0	0	0	0	2	0	2	0	0	2
LOC116916176	125	97	56	12	18	60	161	154	66	749	9	10	96	43	126	25	140	449	14	45	11	41	16	18	57	16	12	230	16	91	47	28	44	69	220	6	521	19	47	45	153	12	113	246	46	681	19	5	78
LOC116916179	2	2	0	0	2	1	3	1	1	12	0	0	0	0	1	0	6	7	0	0	0	0	0	0	0	0	0	0	0	2	1	0	0	0	5	0	8	0	1	1	0	0	1	7	0	10	0	1	0
LOC116916182	5	0	0	0	6	2	7	3	2	25	0	0	1	3	1	1	3	9	0	1	0	0	1	3	0	0	0	5	2	4	3	1	0	1	2	0	13	0	1	2	4	1	2	7	0	17	3	1	0
LOC116916183	2	3	0	0	0	0	1	5	2	13	0	0	0	0	1	0	2	3	0	2	0	0	0	1	0	0	1	4	0	0	1	0	0	1	0	0	2	0	0	0	0	0	0	0	0	0	0	4	0
LOC116916184	2	2	0	0	2	0	3	4	2	15	0	0	4	4	4	0	24	36	0	5	0	1	1	0	5	1	3	16	0	3	0	1	4	0	13	1	22	0	0	0	2	0	4	21	2	29	0	4	0
LOC116916185	9	3	1	2	0	1	1	5	3	25	0	0	2	0	4	1	15	22	0	3	0	6	1	0	3	0	3	16	0	1	4	0	0	1	8	1	15	1	2	2	6	1	5	19	0	36	5	0	3
LOC116916186	190	129	98	30	73	94	152	145	163	1074	28	19	137	58	191	33	208	674	48	70	27	50	23	69	63	19	20	389	24	148	80	48	79	139	242	4	764	29	105	78	161	28	201	213	67	882	69	20	120
LOC116916187	52	34	11	5	13	23	146	57	89	430	2	11	28	16	84	23	63	227	9	11	20	6	8	14	14	31	6	119	8	43	23	7	9	81	94	1	266	3	22	3	42	3	91	94	6	264	4	5	15
LOC116916188	82	49	32	1	32	20	40	64	17	337	2	3	74	13	46	4	66	208	2	22	0	32	1	20	13	2	2	94	2	43	23	15	32	15	74	0	204	8	38	49	54	1	33	137	9	329	3	1	89
LOC116916189	117	56	21	21	27	91	206	228	130	897	5	5	122	57	191	28	294	702	14	11	13	34	6	16	68	33	60	255	9	80	19	36	58	175	244	32	653	8	16	41	149	23	160	320	83	800	8	10	24
LOC116916190	391	102	46	20	54	163	314	306	260	1656	27	31	156	52	191	31	437	925	18	45	28	35	8	25	67	16	20	262	46	136	40	25	48	188	329	10	822	47	70	55	261	26	192	365	84	1100	33	21	99
LOC116916193	322	180	143	28	63	151	342	421	167	1817	19	17	290	101	246	50	496	1219	35	73	23	73	31	50	103	26	54	468	50	232	89	57	96	208	377	19	1128	28	72	78	343	20	217	535	162	1455	61	28	157
LOC116916194	140	69	34	6	28	44	220	294	37	872	4	3	167	6	140	13	295	628	1	17	2	34	0	33	33	0	5	125	8	62	28	22	59	45	478	0	702	16	41	63	134	1	181	583	30	1049	8	5	53
LOC116916195	71	59	33	5	29	38	91	67	77	470	13	12	79	39	95	28	104	370	32	41	32	38	15	42	56	42	18	316	21	71	41	18	38	87	102	5	383	13	48	37	87	8	86	93	45	417	35	19	47
LOC116916196	59	38	24	2	14	29	90	89	36	381	7	1	74	16	38	3	93	232	4	13	3	13	2	3	25	1	10	74	5	27	27	8	15	30	82	4	198	6	21	24	45	3	36	118	10	263	6	8	41
LOC116916197	74	52	29	1	13	4	28	37	16	254	0	4	59	9	14	4	30	120	2	10	2	2	3	19	15	0	3	56	1	34	15	11	8	25	26	1	121	2	19	9	35	1	39	53	13	171	0	4	39
LOC116916198	105	97	8	61	160	80	148	302	128	1089	3	4	440	56	409	54	705	1671	7	30	2	237	54	101	174	20	141	766	5	124	37	163	279	86	437	41	1172	6	40	264	224	38	373	673	269	1887	2	3	30
LOC116916199	3	3	0	0	0	1	5	4	3	19	1	0	2	1	6	0	12	22	0	0	1	2	0	1	3	1	0	8	0	0	0	1	4	3	8	0	16	1	0	1	5	0	4	9	2	22	4	0	1
LOC116916200	1944	978	506	222	385	1019	1354	1397	1226	9031	102	94	1601	709	1470	293	1708	5977	211	288	83	536	158	310	712	297	492	3087	196	1328	449	401	658	1790	1861	169	6852	136	365	452	1609	177	1491	1908	714	6852	235	174	759
LOC116916201	852	199	101	27	70	450	1366	1482	688	5235	39	23	629	250	783	63	1651	3438	38	58	60	106	43	66	225	52	117	765	63	232	78	63	143	742	1105	53	2479	49	104	128	769	24	522	1897	212	3705	41	38	142
LOC116916202	28	17	12	0	0	12	34	37	14	154	2	0	21	3	22	3	46	97	0	6	1	4	0	0	2	2	2	17	0	11	7	1	17	10	46	1	93	1	5	15	41	0	16	70	3	151	0	2	15
LOC116916203	549	263	140	48	74	320	502	484	238	2618	14	35	383	157	294	52	635	1570	26	93	52	94	30	82	93	34	54	558	73	287	107	49	98	382	560	11	1567	35	95	99	499	39	475	582	135	1959	91	50	231
LOC116916204	265	147	51	23	66	96	206	228	159	1241	26	10	188	71	195	41	274	805	15	70	38	46	24	40	91	59	66	449	44	156	57	47	95	188	259	31	877	37	83	92	255	21	161	352	103	1104	24	15	140
LOC116916205	28	24	7	1	9	2	7	5	4	87	0	0	18	3	2	1	11	35	3	2	2	8	1	4	1	1	0	22	4	14	10	4	10	0	6	0	48	1	11	9	12	2	3	12	0	50	5	2	16
LOC116916206	53	38	4	15	15	58	98	83	204	568	1	2	58	53	156	27	117	414	10	7	7	26	14	15	55	47	72	253	3	65	18	21	29	162	113	60	471	3	7	53	69	2	73	119	82	408	4	19	4
LOC116916208	0	0	3	0	0	0	0	0	0	3	0	0	0	0	0	1	1	2	0	0	0	0	1	0	0	0	0	1	0	0	0	0	0	0	0	0	0	0	0	0	0	0	0	0	0	0	0	1	0
LOC116916209	182	73	43	5	36	76	121	207	55	798	7	19	136	24	85	6	221	498	11	23	4	46	6	26	31	9	11	167	15	96	38	22	52	54	134	7	418	11	30	59	107	9	81	314	23	634	11	9	86
LOC116916210	29	19	5	2	6	22	23	23	8	137	1	0	39	7	16	5	60	128	4	9	2	3	2	4	16	0	5	45	8	14	18	9	3	12	39	1	104	4	8	12	50	7	41	54	19	195	13	6	14
LOC116916211	230	176	120	33	61	107	186	357	78	1348	0	33	233	32	148	21	388	855	26	88	33	65	16	60	43	13	46	390	35	201	191	88	128	109	245	14	1011	68	176	104	273	16	89	550	75	1351	47	33	215
LOC116916212	173	134	60	17	43	101	142	216	78	964	15	7	164	47	117	27	266	643	16	47	11	46	17	30	38	12	34	251	16	135	61	31	45	71	179	15	553	12	73	76	169	6	112	271	58	777	13	13	102
LOC116916213	185	145	99	20	83	81	182	231	117	1143	9	17	160	64	148	34	245	677	42	78	14	73	28	49	60	20	57	421	34	182	90	42	67	138	290	18	861	33	77	75	289	15	115	364	63	1031	44	17	135
LOC116916214	85	46	25	2	20	37	68	101	54	438	0	2	96	21	77	16	110	322	7	10	1	12	11	13	27	3	13	97	3	43	16	13	57	79	75	6	292	3	12	31	68	5	99	107	10	335	2	6	25
LOC116916215	127	64	42	15	21	45	108	108	117	647	10	8	116	32	110	18	172	466	9	37	8	56	10	27	43	7	15	212	19	76	53	28	25	73	137	2	413	14	37	34	114	8	126	160	44	537	25	15	62
LOC116916216	282	197	118	43	90	166	264	323	233	1716	22	35	204	91	204	67	342	965	30	90	24	75	27	57	116	44	80	543	36	205	101	60	104	268	343	29	1146	32	99	102	283	40	243	394	136	1329	72	35	101
LOC116916217	19	12	5	4	18	15	47	64	30	214	1	0	51	14	86	9	122	283	0	3	1	17	5	3	24	2	27	82	2	17	7	11	38	48	102	1	226	1	1	21	49	1	54	110	35	272	0	0	0
LOC116916218	8	9	9	3	10	17	31	44	51	182	0	2	41	13	59	9	68	192	2	3	0	15	9	9	20	13	24	95	1	14	5	4	25	34	73	7	163	1	9	20	35	7	41	53	28	194	3	2	6
LOC116916220	351	250	99	12	172	128	168	280	80	1540	15	13	376	31	155	35	375	1000	24	49	27	139	13	89	58	6	44	449	41	139	95	61	268	103	305	11	1023	46	150	201	306	20	210	637	56	1626	29	32	356
LOC116916222	1954	2537	327	80	2251	310	744	1706	447	10356	15	27	6217	50	2247	299	5007	13862	34	244	24	1889	114	1094	1051	20	180	4650	104	870	445	713	3823	347	4151	14	10467	219	895	3328	1323	76	4806	5291	762	16700	68	55	1889
LOC116916223	19	18	20	0	6	13	6	11	5	98	2	3	13	1	1	0	10	30	8	9	4	3	3	1	6	1	0	35	12	22	19	3	7	9	2	0	74	6	11	11	18	8	7	6	7	74	7	11	22
LOC116916224	41	17	13	1	4	5	22	11	8	122	1	1	17	4	1	0	9	33	2	9	4	2	1	1	1	0	1	21	2	38	18	3	1	11	14	0	87	3	6	3	44	1	5	11	2	75	16	5	18
LOC116916225	8	1	0	0	1	1	15	13	13	52	1	0	10	3	10	0	22	46	2	1	0	1	0	2	3	1	4	14	0	8	0	2	2	12	4	2	30	0	0	3	9	0	7	17	16	52	0	1	0
LOC116916226	0	0	0	0	0	1	1	8	2	12	0	0	2	2	2	0	5	11	0	0	1	0	0	0	2	0	0	3	0	0	0	1	0	0	1	0	2	0	0	0	0	0	0	0	1	1	0	0	0
LOC116916228	0	0	0	0	0	0	0	0	0	0	0	0	0	0	0	0	0	0	0	1	1	1	0	0	0	0	2	5	0	0	0	0	0	0	0	0	0	0	0	0	1	0	0	1	0	2	3	5	0
LOC116916229	0	0	0	1	2	0	1	0	1	5	0	0	0	3	1	0	4	8	0	0	0	0	0	1	1	0	0	2	0	0	0	0	0	0	1	0	1	0	0	0	0	0	0	1	0	1	0	3	1
LOC116916231	1	0	0	0	0	0	0	0	0	1	0	0	1	2	0	0	0	3	1	4	0	0	0	1	0	0	0	6	0	0	0	0	0	0	0	0	0	2	4	0	0	0	0	4	0	10	0	0	0
LOC116916233	378	201	102	31	94	163	480	685	346	2480	35	22	385	118	417	48	711	1736	49	90	49	94	32	65	121	41	74	615	57	234	75	57	92	371	510	48	1444	51	116	119	402	25	251	821	132	1917	57	60	146
LOC116916234	105	19	9	3	13	52	172	201	88	662	6	5	105	51	106	17	201	491	7	23	9	29	3	14	35	21	58	199	10	48	12	27	37	98	161	13	406	6	11	32	81	2	76	250	44	502	6	6	17
LOC116916235	8	5	1	0	0	2	12	14	12	54	1	2	14	4	15	0	17	53	0	0	0	1	1	0	3	3	7	15	0	4	0	4	1	16	16	1	42	0	4	8	20	0	13	29	13	87	0	0	0
LOC116916236	12	3	11	0	4	15	8	24	29	106	1	1	7	4	10	1	20	44	4	5	0	6	3	5	16	5	7	51	0	3	3	1	1	9	30	3	50	0	3	14	7	1	7	24	6	62	4	1	2
LOC116916237	1403	614	263	123	215	918	2012	2338	1530	9416	74	70	1187	580	1743	200	2623	6477	133	242	126	325	133	226	623	182	388	2378	164	790	255	207	375	1562	2205	151	5709	107	236	397	1591	94	1182	2873	685	7165	136	111	372
LOC116916238	719	356	241	93	201	517	983	1384	699	5193	51	63	590	308	738	82	1496	3328	69	160	78	142	60	99	244	64	177	1093	112	415	219	109	211	716	1145	67	2994	81	195	206	742	51	581	1486	322	3664	110	65	348
LOC116916240	1	1	0	3	8	11	11	13	19	67	0	0	19	3	5	1	16	44	1	0	0	3	1	2	2	1	8	18	0	10	2	1	4	6	13	0	36	0	1	3	8	0	5	15	7	39	0	0	0
LOC116916241	40	26	17	4	17	17	44	56	66	287	8	8	24	24	44	12	73	193	9	20	6	19	8	13	21	9	25	130	8	28	15	9	12	53	59	3	187	10	20	12	50	9	45	64	26	236	10	7	17
LOC116916245	546	282	116	60	98	226	424	546	220	2518	17	14	447	125	392	57	734	1786	36	85	20	104	39	89	122	51	78	624	41	223	107	95	211	357	588	21	1643	37	134	168	400	23	363	834	166	2125	38	25	226
LOC116916246	2	0	2	0	0	0	0	0	0	4	0	0	3	0	0	0	0	3	0	2	0	0	0	0	0	0	0	2	0	0	0	0	0	0	0	0	0	0	0	0	0	0	1	2	0	3	0	0	1
LOC116916247	911	388	194	67	97	671	1293	1585	1149	6355	54	62	693	425	1048	156	1753	4191	111	131	107	150	71	94	390	171	284	1509	96	492	179	124	222	1483	1529	116	4241	61	149	200	1029	56	812	1634	429	4370	74	56	256
LOC116916248	1037	761	364	85	213	716	1669	2246	814	7905	66	78	960	373	1113	122	1759	4471	149	284	103	237	99	225	482	142	197	1918	154	799	467	234	415	1199	2170	65	5503	127	433	321	1281	87	864	2678	424	6215	156	85	564
LOC116916249	5	0	0	0	0	2	1	0	0	8	0	2	4	0	0	0	3	9	0	0	2	1	1	1	0	0	1	6	0	0	4	0	2	1	2	1	10	0	3	0	3	0	1	2	0	9	1	1	0
LOC116916250	683	372	195	78	184	248	469	603	248	3080	30	21	595	108	383	62	846	2045	71	162	56	204	47	136	169	10	75	930	77	457	205	132	266	214	632	34	2017	77	238	242	631	53	480	922	210	2853	67	57	404
LOC116916253	69	66	36	8	23	24	31	35	14	306	1	5	65	7	19	2	42	141	3	24	8	14	2	21	5	0	4	81	6	43	24	8	21	15	44	1	162	7	46	32	37	5	32	80	7	246	30	10	77
LOC116916255	6	2	0	0	0	5	0	3	4	20	0	0	3	2	2	0	6	13	1	2	0	2	0	0	1	1	0	7	0	7	0	2	1	2	2	0	14	0	0	1	10	0	3	9	0	23	0	2	1
LOC116916256	2	3	0	2	0	2	6	4	8	27	0	0	4	2	8	1	6	21	1	1	1	2	0	6	4	2	0	17	0	11	3	0	5	4	7	0	30	2	5	0	5	0	5	1	3	21	2	1	2
LOC116916257	122	103	36	10	37	84	78	155	72	697	6	8	192	26	132	22	286	672	11	22	11	60	8	26	48	4	14	204	15	57	35	28	83	73	221	3	515	22	52	88	158	13	154	297	56	840	14	17	88
LOC116916258	286	158	108	35	74	113	210	241	157	1382	14	15	272	117	258	44	318	1038	73	48	17	44	22	42	92	63	104	505	38	180	66	38	78	267	287	40	994	20	83	99	289	21	179	537	105	1333	45	25	158
LOC116916259	44	28	30	6	16	26	54	75	26	305	1	2	67	9	51	0	100	230	1	11	1	14	3	14	17	0	2	63	3	29	18	11	29	23	87	0	200	2	35	41	60	3	42	138	7	328	4	0	41
LOC116916260	13	18	6	0	4	4	11	11	2	69	2	2	19	0	9	1	11	44	1	4	1	4	0	2	4	0	2	18	4	8	3	2	3	0	12	1	33	2	5	16	8	0	14	23	3	71	3	4	3
LOC116916261	419	329	188	46	118	247	571	829	276	3023	18	29	500	133	497	68	851	2096	42	149	34	127	35	83	149	31	80	730	38	308	104	93	199	285	695	28	1750	48	183	220	434	35	346	1047	194	2507	65	52	261
LOC116916262	25	31	0	9	15	15	23	23	17	158	0	0	67	9	38	18	48	180	3	3	4	20	10	14	27	8	30	119	0	29	11	22	27	27	48	7	171	2	5	39	51	3	42	66	23	231	1	5	10
LOC116916263	36	45	28	0	13	27	55	55	70	329	9	3	40	20	57	5	79	213	4	23	9	10	3	15	36	9	7	116	7	44	26	16	23	32	88	2	238	3	28	32	60	5	66	79	43	316	11	2	26
LOC116916264	202	43	3	0	5	8	30	28	0	319	0	1	144	2	8	0	0	155	3	6	0	4	4	3	6	0	0	26	0	10	0	7	6	3	30	0	56	0	4	25	57	1	3	92	0	182	6	4	100
LOC116916266	11	2	3	0	0	1	11	6	11	45	1	1	2	4	5	0	1	14	3	0	0	0	2	0	1	2	1	9	4	4	0	0	0	7	6	0	21	0	2	0	3	3	11	5	1	25	0	0	0
LOC116916270	55	27	12	6	24	27	114	144	40	449	2	4	85	22	76	10	165	364	9	14	6	16	5	16	17	6	8	97	5	32	15	12	37	58	152	3	314	4	21	29	42	0	50	239	20	405	9	4	27
LOC116916271	1028	163	37	21	125	1170	7213	8977	1352	20086	7	6	1448	74	3341	165	7805	12846	6	10	8	83	29	88	740	25	41	1030	11	47	33	46	556	1191	13095	12	14991	23	31	334	1806	9	3575	19197	114	25089	11	24	102
LOC116916272	305	240	133	31	71	157	252	339	196	1724	15	11	252	144	200	49	282	953	44	104	15	77	37	42	150	15	64	548	44	264	147	80	127	210	402	12	1286	38	95	91	301	36	284	414	162	1421	58	16	222
LOC116916273	2	7	0	0	9	0	0	0	2	20	0	0	3	0	0	0	2	5	0	0	0	0	0	2	0	0	0	2	1	1	1	1	1	0	1	0	6	0	2	3	1	0	1	2	0	9	1	1	5
LOC116916274	779	248	58	11	50	255	524	794	150	2869	3	4	494	79	238	22	594	1434	26	10	20	54	19	40	102	6	23	300	5	178	61	42	139	178	509	2	1114	6	62	96	435	14	317	918	63	1911	11	12	154
LOC116916275	103	103	30	11	11	14	19	58	24	373	0	5	84	8	44	3	51	195	5	7	2	27	4	27	23	0	9	104	2	37	29	11	50	5	44	0	178	7	44	26	59	3	49	63	16	267	1	16	89
LOC116916276	68	51	28	1	15	25	66	121	35	410	1	6	84	11	68	11	173	354	5	16	8	14	9	27	18	5	9	111	8	32	18	11	23	35	116	2	245	6	29	32	70	2	53	158	15	365	1	4	43
LOC116916277	12	16	7	0	2	5	6	3	1	52	1	0	3	0	1	0	7	12	1	1	0	4	0	3	1	0	0	10	4	9	9	4	2	2	4	0	34	3	5	9	6	0	3	4	0	30	1	3	17
LOC116916278	321	200	85	24	97	169	202	173	208	1479	22	23	320	121	214	57	356	1113	56	112	31	103	35	48	101	64	84	634	48	283	105	69	150	206	273	17	1151	32	128	117	282	39	253	320	136	1307	72	37	175
LOC116916279	249	40	7	8	15	207	858	869	171	2424	5	0	106	33	263	6	837	1250	2	9	3	13	9	9	47	1	14	107	8	37	25	8	17	156	795	5	1051	9	12	38	250	7	122	1116	48	1602	11	9	30
LOC116916280	6	8	4	0	6	0	0	2	3	29	0	0	33	3	1	2	10	49	0	1	1	6	0	5	3	0	0	16	0	4	4	6	19	2	14	0	49	3	4	18	16	0	8	23	1	73	1	1	8
LOC116916281	1179	560	216	76	135	902	2165	2592	1243	9068	81	57	857	504	1486	153	2674	5812	123	214	102	149	79	120	484	197	283	1751	157	746	191	133	246	1931	2051	140	5595	99	217	230	1528	76	938	2709	453	6250	181	109	329
LOC116916282	1	0	0	0	0	0	3	0	0	4	0	0	0	0	0	0	0	0	0	0	0	0	0	0	0	0	0	0	0	0	0	0	0	0	0	0	0	0	0	0	0	0	0	1	0	1	0	0	0
LOC116916283	64	23	18	6	35	31	18	22	4	221	0	1	31	8	3	5	5	53	11	8	6	14	4	13	4	0	0	60	6	18	21	14	10	4	33	0	106	6	5	17	53	3	4	43	4	135	6	3	22
LOC116916287	38	22	21	3	7	22	47	45	30	235	4	0	17	22	32	10	42	127	1	2	6	5	3	1	8	3	7	36	3	29	6	4	7	38	56	1	144	3	6	5	33	5	25	55	9	141	0	1	17
LOC116916288	0	2	0	0	9	0	2	0	1	14	0	0	1	0	0	0	2	3	2	0	2	0	1	0	0	0	0	5	0	0	0	0	3	0	1	0	4	1	0	1	1	0	0	1	0	4	2	0	0
LOC116916292	0	0	0	0	0	0	0	0	0	0	1	0	1	0	0	0	0	2	0	0	0	1	0	0	0	0	0	1	0	1	0	0	0	0	0	0	1	0	0	1	0	0	0	0	0	1	0	0	0
LOC116916294	166	94	45	13	23	63	137	145	131	817	11	5	119	63	175	29	191	593	37	26	8	40	9	27	39	37	72	295	17	125	36	39	74	146	181	20	638	14	48	56	137	10	137	239	84	725	24	14	67
LOC116916295	233	138	67	38	41	145	384	342	324	1712	5	7	280	152	452	80	390	1366	63	40	34	75	28	28	163	126	92	649	23	180	62	45	95	449	514	56	1424	9	52	67	268	21	389	558	192	1556	20	19	130
LOC116916296	353	124	39	17	69	338	796	853	97	2686	6	6	322	24	150	15	553	1076	5	29	18	47	7	35	33	3	17	194	16	63	20	15	156	147	446	4	867	9	33	137	202	2	173	1001	34	1591	17	10	104
LOC116916297	89	62	31	8	30	42	110	191	39	602	1	2	119	16	69	3	251	461	6	21	1	39	12	20	18	1	9	127	7	48	31	9	54	45	160	3	357	16	38	70	100	6	64	266	23	583	8	2	64
LOC116916298	1197	648	271	129	480	616	477	613	646	5077	38	38	1341	354	850	239	1236	4096	141	240	52	425	89	190	470	58	261	1926	85	768	359	298	575	495	964	72	3616	92	314	539	1236	150	999	1015	423	4768	113	122	490
LOC116916299	1	1	0	0	0	0	3	2	1	8	0	3	1	1	6	2	3	16	0	0	0	1	0	0	0	1	2	4	0	0	1	1	7	6	2	0	17	0	0	4	1	2	0	6	2	15	0	0	0
LOC116916300	308	192	105	52	86	172	659	767	495	2836	8	5	411	189	713	114	1181	2621	51	54	12	149	56	106	272	58	315	1073	20	237	82	136	227	481	1025	93	2301	42	71	162	373	45	504	1081	520	2798	27	33	161
LOC116916301	52	23	16	0	17	28	55	51	22	264	1	2	45	8	43	3	89	191	4	4	0	9	0	4	5	0	3	29	2	20	11	6	13	19	54	5	130	7	6	13	41	1	44	74	13	199	0	8	31
LOC116916302	86	43	24	4	25	36	125	135	34	512	3	3	87	12	90	4	125	324	0	18	0	25	4	34	21	2	16	120	9	42	23	23	54	43	143	2	339	12	50	45	81	1	60	214	26	489	14	4	61
LOC116916303	574	369	188	97	139	401	976	1332	861	4937	46	60	586	333	989	116	1330	3460	93	230	104	210	83	145	385	120	247	1617	95	528	210	146	195	732	1033	82	3021	55	200	223	670	76	608	1353	420	3605	94	64	324
LOC116916304	8	7	4	0	3	10	19	14	3	68	0	0	2	0	3	2	3	10	0	4	0	1	0	0	3	0	0	8	0	3	1	0	7	4	12	0	27	0	0	0	6	0	0	13	0	19	0	0	6
LOC116916305	66	53	20	8	20	36	51	79	55	388	3	2	64	18	56	6	76	225	10	17	3	12	4	15	25	1	4	91	6	55	20	19	13	29	66	0	208	7	28	24	69	1	65	79	7	280	4	3	44
LOC116916306	2228	1218	246	78	531	662	785	1362	680	7790	12	24	3581	223	1507	199	3054	8600	74	180	34	678	122	301	726	21	205	2341	60	688	284	402	1107	463	2203	40	5247	73	370	807	2042	82	2167	3524	551	9616	67	55	875
LOC116916307	8	7	2	0	1	11	7	13	6	55	0	0	6	4	8	1	8	27	0	1	0	0	0	3	6	1	3	14	1	7	3	3	3	10	24	0	51	2	4	3	7	0	19	26	1	62	2	0	9
LOC116916309	0	2	1	0	2	2	6	2	10	25	0	0	3	2	3	1	6	15	2	1	1	0	0	1	4	1	1	11	0	2	1	0	0	1	3	0	7	1	0	4	3	0	1	6	3	18	0	0	0
LOC116916310	4	1	0	0	0	4	0	4	3	16	0	0	3	0	0	0	2	5	0	0	0	1	0	0	0	0	0	1	0	0	2	0	0	0	2	0	4	1	1	2	6	0	2	7	0	19	0	0	1
LOC116916311	13	0	5	0	0	18	6	1	0	43	0	0	0	12	8	0	0	20	1	0	0	0	0	2	3	0	2	8	0	1	6	0	0	4	3	0	14	2	1	0	1	0	5	24	0	33	0	2	1
LOC116916312	4	6	2	0	3	0	8	7	2	32	0	1	7	1	4	1	10	24	0	1	3	7	2	0	0	0	1	14	0	5	1	0	2	1	6	0	15	2	3	0	3	0	7	10	2	27	2	0	4
LOC116916313	65	10	0	0	0	1	10	0	0	86	0	0	0	0	3	0	3	6	0	5	5	0	0	2	2	0	0	14	4	1	2	0	0	1	1	0	9	0	0	2	4	0	0	35	0	41	0	0	4
LOC116916315	0	0	0	0	0	0	0	0	0	0	0	0	0	0	0	0	0	0	0	0	0	0	0	0	0	0	0	0	0	1	0	0	0	0	1	0	2	0	0	1	0	0	0	1	0	2	0	0	0
LOC116916316	64	42	30	5	19	28	45	53	35	321	3	6	51	23	47	10	74	214	24	13	9	34	9	9	21	9	7	135	10	68	33	14	24	58	72	2	281	11	24	33	58	4	54	90	15	289	19	10	52
LOC116916317	155	60	44	14	36	50	90	142	29	620	6	4	118	21	81	17	148	395	16	28	4	20	10	30	36	3	13	160	8	83	45	20	43	29	131	4	363	21	43	61	134	14	72	239	32	616	13	21	74
LOC116916318	27	17	5	0	10	4	14	24	12	113	0	0	29	0	12	7	27	75	2	17	4	5	0	6	7	1	1	43	2	25	14	2	15	8	31	3	100	3	13	12	27	4	13	25	9	106	3	2	29
LOC116916319	23	30	2	1	21	3	9	42	16	147	0	0	180	1	78	4	163	426	2	1	0	40	5	25	23	2	11	109	0	11	4	28	170	11	79	3	306	0	3	125	29	0	115	234	40	546	0	0	0
LOC116916320	23	14	2	3	5	11	24	14	25	121	2	0	24	10	48	17	21	122	7	0	3	1	0	0	16	19	6	52	2	11	6	5	7	37	41	17	126	0	2	18	14	0	29	51	7	121	5	3	5
LOC116916321	212	166	80	27	105	99	175	263	141	1268	8	6	363	49	217	32	460	1135	38	51	18	86	31	60	84	20	94	482	19	167	59	46	160	151	309	35	946	27	65	116	281	17	177	581	95	1359	21	15	177
LOC116916322	287	294	147	25	115	108	225	496	102	1799	10	12	425	40	340	30	574	1431	7	78	12	121	20	89	81	7	23	438	36	177	77	65	169	98	433	12	1067	59	149	170	277	5	225	676	98	1659	19	20	276
LOC116916324	224	92	37	7	13	95	147	173	105	893	0	0	115	57	112	5	157	446	17	4	3	13	5	5	49	10	12	118	2	105	21	12	33	121	117	7	418	3	19	37	117	3	115	185	27	506	1	7	74
LOC116916325	327	137	23	6	34	198	607	1149	305	2786	3	5	848	56	626	34	1384	2956	14	17	6	42	20	33	122	5	25	284	7	59	11	37	221	300	624	39	1298	14	27	260	478	3	278	1813	107	2980	7	6	64
LOC116916326	0	1	1	2	0	0	1	0	0	5	0	0	0	0	3	1	1	5	0	2	0	0	2	1	0	0	0	5	1	1	0	1	1	0	2	0	6	0	0	0	2	0	2	0	2	6	0	0	0
LOC116916327	63	36	8	3	2	52	94	46	67	371	0	8	46	20	33	8	156	271	2	6	2	13	2	5	12	3	5	50	4	19	4	13	18	68	80	0	206	4	7	9	62	9	80	90	18	279	5	9	28
LOC116916328	2495	872	236	76	320	1155	1633	2062	1069	9918	46	33	1987	684	1367	201	2916	7234	110	219	59	326	83	206	627	114	201	1945	62	861	278	234	654	1326	2507	56	5978	88	238	581	2362	111	1452	3486	465	8783	96	80	631
LOC116916329	70	7	0	0	11	0	18	27	5	138	0	0	42	3	9	0	17	71	0	0	0	1	3	8	3	0	0	15	0	3	0	0	13	6	11	0	33	0	2	4	31	0	15	45	0	97	0	1	8
LOC116916331	500	187	52	16	99	260	723	967	349	3153	8	14	652	53	604	48	1655	3034	10	51	18	91	23	52	184	11	63	503	23	120	53	89	265	366	1129	20	2065	26	67	205	527	13	643	1696	163	3340	21	13	161
LOC116916332	6	2	6	0	3	10	7	7	6	47	2	2	16	4	11	3	5	43	0	5	3	4	2	0	2	3	1	20	3	2	0	2	0	13	7	0	27	0	3	2	2	0	5	9	8	29	0	1	6
LOC116916333	1720	478	127	31	124	524	1200	1785	625	6614	10	24	1150	71	1061	105	2708	5129	17	79	23	128	52	109	374	5	68	855	33	304	113	98	251	330	1890	15	3034	32	153	214	1246	18	1112	2384	279	5438	55	29	265
LOC116916336	3	2	2	0	0	0	3	5	2	17	0	0	1	6	4	3	4	18	0	2	0	0	1	0	0	1	0	4	0	2	1	0	0	8	2	2	15	0	6	0	2	0	6	5	0	19	9	0	2
LOC116916337	3	3	1	0	0	2	1	2	0	12	0	0	3	0	1	0	2	6	0	0	0	0	0	0	0	0	0	0	0	2	0	0	1	0	3	0	6	0	3	0	5	0	2	6	0	16	0	0	1
LOC116916339	103	53	13	17	11	87	234	242	345	1105	0	2	153	105	293	40	374	967	27	18	5	39	23	29	108	76	143	468	3	111	16	20	52	353	216	75	846	5	16	58	175	17	148	356	106	881	7	17	13
LOC116916340	365	202	128	30	117	206	356	634	181	2219	11	23	401	47	366	46	889	1783	18	62	25	122	29	72	128	5	56	517	37	209	107	100	153	167	590	5	1368	34	104	149	487	18	308	922	145	2167	29	32	206
LOC116916341	5	3	5	0	5	10	3	4	5	40	0	2	9	2	6	3	6	28	0	4	0	3	1	0	2	6	1	17	1	10	4	3	9	10	4	0	41	0	9	3	11	2	3	5	7	40	0	3	3
LOC116916343	8	7	0	0	8	6	13	16	17	75	0	0	19	8	18	2	23	70	0	7	1	2	0	3	9	1	7	30	0	2	0	3	4	6	21	3	39	0	3	12	8	0	15	19	5	62	0	1	3
LOC116916344	414	274	81	56	72	307	613	713	637	3167	31	27	523	409	878	115	977	2960	78	56	23	161	63	71	265	278	330	1325	24	343	140	122	152	908	756	115	2560	25	79	160	679	32	441	950	411	2777	87	17	117
LOC116916345	1	5	0	0	6	4	1	2	0	19	0	0	4	0	4	0	7	15	0	1	0	12	1	2	1	1	2	20	0	1	0	2	9	4	1	1	18	0	1	8	18	0	4	18	1	50	0	0	0
LOC116916346	1457	1175	686	150	132	1416	1729	1484	1961	10190	91	84	1366	972	905	253	1584	5255	241	418	149	226	95	164	569	350	272	2484	210	1218	503	256	351	2482	1550	98	6668	119	386	205	1609	140	1588	1583	726	6356	182	224	800
LOC116916347	1606	1049	401	171	322	1418	2157	1998	1503	10625	99	83	1455	759	1379	333	1950	6058	225	387	194	377	134	303	736	236	445	3037	234	1092	479	347	459	2368	2059	204	7242	156	429	364	1825	186	1867	2461	642	7930	258	231	616
LOC116916348	56	247	169	24	126	4	8	20	11	665	8	18	168	16	4	0	24	238	20	76	15	102	6	73	3	0	0	295	28	128	191	127	377	4	34	0	889	89	158	180	85	6	4	23	21	566	18	12	306
LOC116916349	45	15	12	1	22	39	31	65	18	248	0	3	67	3	65	9	90	237	0	11	1	14	0	7	16	0	5	54	15	19	19	14	18	25	88	2	200	6	14	13	56	2	47	109	22	269	2	6	18
LOC116916350	187	84	23	88	86	153	359	422	254	1656	14	15	358	162	462	84	601	1696	18	38	21	140	61	91	184	105	203	861	17	183	43	98	176	277	400	79	1273	17	30	175	323	37	267	598	252	1699	21	12	57
LOC116916351	408	257	206	70	126	162	254	273	182	1938	39	40	281	111	186	39	336	1032	75	145	63	97	44	91	78	36	67	696	92	350	163	69	112	182	370	6	1344	62	161	108	313	42	142	423	121	1372	79	26	254
LOC116916352	278	60	35	6	13	150	421	391	95	1449	13	12	77	39	95	16	250	502	8	42	22	14	7	18	32	6	20	169	23	87	20	17	11	138	292	6	594	8	29	24	183	6	73	399	29	751	18	7	34
LOC116916353	1398	780	133	36	277	296	793	2089	261	6063	13	17	2356	28	1429	91	4796	8730	14	66	12	301	34	207	485	7	55	1181	48	291	138	187	677	205	3462	15	5023	84	268	748	1263	15	1943	5847	291	10459	27	22	481
LOC116916354	0	1	1	0	0	0	1	3	1	7	0	0	3	0	2	0	3	8	0	0	0	0	0	0	2	0	0	2	0	0	0	3	0	1	5	0	9	0	1	1	1	0	6	1	0	10	0	0	0
LOC116916358	11	6	5	1	0	2	6	7	8	46	1	2	3	5	11	4	6	32	0	0	4	2	0	2	0	2	2	12	9	7	0	1	1	2	7	1	28	0	0	3	6	0	7	6	3	25	6	2	5
LOC116916359	4	2	0	2	1	0	0	0	3	12	0	0	0	3	0	2	2	7	2	0	2	0	1	0	2	0	1	8	0	2	0	0	0	5	3	0	10	0	1	0	3	0	1	4	0	9	0	0	0
LOC116916360	0	1	0	0	0	0	0	0	0	1	0	0	0	0	0	2	0	2	0	0	0	0	0	0	0	0	1	1	0	1	0	0	2	0	0	0	3	0	1	0	0	0	0	0	0	1	0	0	1
LOC116916361	47	21	17	3	6	25	38	26	18	201	2	0	19	4	10	2	32	69	17	11	1	0	4	3	6	0	1	43	2	32	5	9	17	34	45	0	144	8	13	5	33	5	19	33	7	123	0	5	26
LOC116916362	3	0	0	0	0	2	5	4	8	22	0	0	7	3	8	1	16	35	0	1	0	1	0	1	1	0	1	5	0	0	0	0	0	7	6	0	13	0	1	0	3	0	8	11	1	24	0	0	0
LOC116916363	9	4	0	0	8	11	17	9	7	65	0	1	8	1	23	6	22	61	0	4	0	3	1	5	2	1	0	16	0	1	2	1	10	19	31	3	67	1	4	9	8	2	23	35	2	84	0	0	5
LOC116916364	1465	980	566	134	691	735	733	775	211	6290	152	82	1091	264	257	95	503	2444	146	524	79	497	161	388	232	56	22	2105	223	1083	381	169	493	466	1016	13	3844	196	576	615	1650	119	306	1539	191	5192	238	157	1157
LOC116916365	758	551	273	99	170	378	507	678	351	3765	59	83	710	363	431	93	575	2314	153	220	73	182	71	165	218	101	108	1291	150	627	358	219	318	643	788	41	3144	102	322	235	736	98	453	1061	238	3245	109	101	399
LOC116916366	85	84	36	18	18	43	42	83	54	463	6	5	62	23	46	8	55	205	10	25	5	28	7	14	19	16	19	143	18	72	33	12	50	48	70	3	306	21	34	43	84	12	47	98	28	367	11	8	56
LOC116916367	128	82	51	12	37	44	86	130	35	605	3	2	95	9	80	7	171	367	3	19	4	29	7	26	20	1	6	115	17	55	36	22	33	36	117	0	316	11	32	39	108	1	51	194	30	466	11	3	99
LOC116916368	2	8	2	0	3	4	12	19	5	55	0	0	10	8	7	0	12	37	0	0	0	1	0	5	2	1	0	9	0	2	1	0	0	2	13	0	18	0	3	5	16	0	5	32	2	63	2	1	4
LOC116916369	127	64	49	15	24	56	114	116	53	618	4	7	130	28	126	8	200	503	11	24	8	26	9	23	36	3	17	157	16	80	42	29	41	61	126	1	396	5	31	30	102	10	107	187	39	511	15	10	53
LOC116916370	49	43	30	8	12	28	58	62	40	330	11	4	38	40	30	9	52	184	18	31	3	19	6	8	36	16	23	160	10	68	37	11	17	66	49	6	264	4	19	19	46	12	61	81	35	277	10	7	23
LOC116916371	10	5	3	0	6	0	4	2	1	31	1	0	8	0	2	0	0	11	0	0	0	4	1	4	1	0	0	10	2	2	3	2	0	0	5	0	14	1	2	8	6	0	2	15	1	35	0	0	8
LOC116916372	109	56	12	4	15	54	122	124	78	574	3	7	102	25	119	24	165	445	14	8	7	5	8	26	26	14	22	130	8	44	21	23	35	120	174	11	436	8	23	37	108	6	105	167	31	485	2	7	38
LOC116916373	416	218	142	98	109	323	534	684	422	2946	24	23	405	259	531	119	835	2196	82	114	56	199	62	117	268	75	273	1246	63	412	112	163	199	445	645	89	2128	61	153	200	472	66	433	816	342	2543	96	57	171
LOC116916374	1766	501	225	91	170	690	1638	2291	946	8318	25	30	906	212	1174	121	2780	5248	47	136	56	129	79	113	353	24	157	1094	87	516	195	126	305	685	1893	24	3831	86	185	237	1390	45	898	2335	405	5581	68	51	296
LOC116916375	76	22	14	8	37	53	53	36	84	383	3	10	100	63	117	29	95	417	19	15	1	26	9	23	79	68	24	264	6	50	24	24	46	161	105	19	435	5	23	42	105	16	137	62	58	448	5	10	27
LOC116916376	0	1	0	0	0	0	0	2	0	3	0	0	2	0	0	0	3	5	0	0	0	0	0	0	0	0	0	0	0	2	0	0	0	0	2	0	4	0	0	1	1	0	0	2	0	4	0	0	1
LOC116916377	5	0	1	2	0	5	3	3	3	22	0	2	3	1	2	2	0	10	0	1	1	0	0	0	5	1	2	10	4	3	0	0	0	7	3	2	19	1	3	0	5	0	5	9	3	26	0	0	2
LOC116916378	3	7	1	1	1	9	5	6	6	39	0	2	11	1	3	2	6	25	2	0	1	5	1	2	4	1	5	21	1	10	3	1	8	3	5	7	38	0	4	4	6	3	8	14	6	45	5	4	7
LOC116916380	1531	373	125	32	120	829	2010	3025	659	8704	28	32	1117	182	1152	50	2769	5330	33	80	32	137	44	80	259	28	67	760	68	299	94	93	345	850	1825	50	3624	48	162	309	1338	24	750	3454	208	6293	60	34	267
LOC116916386	1	1	3	0	2	0	3	1	5	16	0	0	0	3	4	2	9	18	5	3	2	0	0	1	2	1	0	14	0	4	0	1	2	0	5	0	12	0	0	3	3	0	8	7	1	22	3	0	0
LOC116916387	172	90	93	25	45	83	148	158	136	950	13	11	136	44	183	32	230	649	23	58	19	48	9	15	80	21	33	306	17	111	62	46	62	130	269	7	704	15	62	61	147	19	258	260	54	876	38	14	156
LOC116916388	15	16	4	3	11	3	23	11	10	96	1	1	35	3	14	3	50	107	0	3	4	4	2	4	1	1	3	22	0	7	3	1	8	5	31	0	55	1	11	11	10	0	23	66	5	127	0	0	7
LOC116916389	456	204	56	42	41	286	1060	1175	693	4013	36	19	381	260	858	68	1457	3079	53	78	42	79	27	37	235	80	153	784	38	159	58	65	151	882	861	114	2328	33	55	137	407	21	473	1304	282	2712	38	41	92
LOC116916390	24	3	1	3	2	12	6	11	3	65	0	2	19	6	5	0	4	36	0	3	2	2	3	5	6	1	2	24	1	3	1	1	4	2	4	0	16	1	3	7	12	2	5	9	0	39	0	2	19
LOC116916391	9	10	3	0	1	16	5	10	1	55	0	0	14	4	8	0	7	33	1	1	1	1	1	0	1	0	0	6	0	11	2	6	4	2	8	0	33	4	5	8	3	1	3	4	2	30	9	0	10
LOC116916392	234	110	54	21	24	76	162	258	35	974	6	2	238	75	35	6	81	443	4	50	13	15	12	14	33	2	10	153	13	89	20	23	44	82	96	3	370	4	36	54	150	13	59	150	11	477	15	39	71
LOC116916393	99	47	21	7	28	72	155	228	70	727	1	6	143	32	122	13	292	609	2	27	6	26	10	19	31	4	20	145	17	64	36	22	48	73	174	1	435	8	36	38	132	6	76	321	26	643	3	8	70
LOC116916394	12	4	1	1	0	5	20	8	13	64	1	0	10	5	26	6	33	81	2	6	0	1	1	1	5	2	2	20	0	13	7	0	3	10	25	0	58	0	1	5	12	1	22	20	1	62	0	2	7
LOC116916395	4	1	0	0	0	7	2	4	1	19	0	0	0	1	0	1	1	3	3	0	2	0	0	0	0	0	0	5	3	0	0	0	0	2	3	0	8	0	0	0	3	0	0	4	0	7	0	0	0
LOC116916396	2783	503	62	57	77	1728	4613	3660	2703	16186	23	36	2424	1124	4696	675	2255	11233	76	54	85	163	75	86	1815	905	166	3425	33	489	92	122	647	6383	4504	267	12537	23	68	306	2968	88	3896	4533	308	12190	49	65	270
LOC116916397	26	4	17	0	2	1	14	0	1	65	1	2	7	1	7	6	0	24	3	8	0	9	0	2	0	1	0	23	6	6	0	0	1	1	40	1	55	1	5	0	4	1	8	37	1	57	2	2	6
LOC116916398	145	21	28	16	11	420	2549	402	1500	5092	0	1	367	183	524	107	4851	6033	0	1	4	30	19	11	385	45	60	555	1	22	4	18	13	740	728	81	1607	13	1	68	733	15	1057	3054	551	5492	106	4	3
LOC116916399	14	6	2	1	2	53	70	39	47	234	0	0	31	6	21	0	229	287	1	0	0	4	2	3	17	0	0	27	0	2	1	2	2	14	35	2	58	1	0	1	34	3	33	168	15	255	0	0	0
LOC116916400	2	5	1	0	0	2	4	3	1	18	2	1	1	0	2	0	2	8	1	0	1	0	0	0	3	0	0	5	0	0	0	1	7	0	2	0	10	1	0	0	2	0	3	7	0	13	0	3	0
LOC116916401	0	2	0	0	0	9	14	7	1	33	0	2	0	1	4	0	31	38	0	0	1	0	0	0	2	0	0	3	0	2	0	0	0	1	6	0	9	0	0	1	6	0	9	18	2	36	0	0	0
LOC116916403	665	329	37	21	21	1680	1537	1854	1011	7155	3	3	281	146	362	130	4108	5033	18	68	23	26	7	19	591	36	69	857	15	212	39	57	86	1021	1477	24	2931	32	36	78	751	16	1194	3320	662	6089	216	16	29
LOC116916405	6	0	1	0	0	0	7	8	1	23	0	1	2	2	1	0	5	11	1	2	0	4	0	1	1	0	0	9	0	0	0	0	4	0	5	0	9	0	0	0	2	0	5	5	1	13	0	0	0
LOC116916406	0	0	0	0	0	0	1	0	0	1	0	0	0	0	0	0	1	1	0	0	0	0	0	0	1	0	0	1	0	0	0	0	0	0	0	0	0	3	0	2	0	0	0	0	2	7	0	0	0
LOC116916409	0	1	0	0	0	0	2	1	4	8	0	0	4	4	4	1	1	14	3	4	0	2	0	0	0	0	6	15	0	0	0	2	1	8	3	0	14	0	1	1	1	1	2	9	1	16	0	4	0
LOC116916410	82	15	1	0	3	9	29	20	6	165	2	2	13	4	5	0	18	44	4	2	2	5	2	0	0	0	0	15	0	3	4	3	3	19	6	0	38	3	6	3	12	2	2	33	0	61	5	3	4
LOC116916413	222	188	73	72	114	143	185	274	180	1451	5	13	285	104	313	87	385	1192	42	88	14	152	45	90	134	68	189	822	21	184	90	106	238	228	311	62	1240	26	93	154	260	51	234	576	196	1590	33	43	162
LOC116916414	62	31	27	14	26	26	82	114	39	421	1	10	60	26	65	5	153	320	17	11	14	19	8	12	31	13	25	150	6	48	17	13	24	69	103	4	284	8	19	35	93	5	70	142	44	416	10	3	25
LOC116916415	105	59	28	10	37	32	91	198	22	582	3	4	183	3	98	7	292	590	0	17	8	60	8	32	16	1	15	157	9	43	22	21	60	13	179	0	347	16	41	71	111	4	98	377	24	742	4	6	68
LOC116916416	12	1	0	0	0	9	8	22	2	54	0	0	8	3	15	0	19	45	0	0	0	3	0	2	4	0	0	9	0	7	0	2	1	4	27	0	41	0	6	7	5	0	6	57	4	85	0	0	5
LOC116916417	282	208	108	31	67	181	311	465	299	1952	9	15	320	161	393	66	527	1491	35	85	31	117	27	65	124	80	181	745	37	217	69	63	148	352	361	66	1313	25	111	115	346	43	244	655	205	1744	25	36	125
LOC116916418	626	435	120	37	285	184	529	965	196	3377	7	29	1072	44	587	94	1731	3564	32	120	14	316	52	182	230	8	78	1032	39	270	182	179	543	183	1155	18	2569	90	221	468	549	48	829	1781	239	4225	49	38	385
LOC116916419	67	35	8	4	10	40	108	100	36	408	6	3	62	12	49	9	113	254	5	18	3	9	2	10	23	3	6	79	13	38	10	3	27	43	86	7	227	0	17	21	57	4	49	160	16	324	7	2	26
LOC116916420	5	5	5	1	6	4	4	3	2	35	0	0	3	0	4	1	7	15	0	0	0	2	0	2	0	0	0	4	2	3	1	0	3	0	5	0	14	1	3	8	5	1	2	2	0	22	0	0	3
LOC116916421	213	165	118	34	43	80	91	113	163	1020	14	16	203	57	150	37	223	700	41	68	35	83	16	55	110	36	30	474	33	215	116	57	113	111	150	4	799	21	133	124	183	21	212	198	57	949	25	33	186
LOC116916422	278	112	30	4	33	168	400	515	132	1672	9	2	194	37	215	14	492	963	9	27	10	28	6	24	64	4	17	189	16	66	36	22	52	158	399	7	756	11	41	64	190	7	184	560	57	1114	24	6	57
LOC116916423	65	23	14	4	4	40	142	177	46	515	2	1	58	19	64	8	143	295	3	7	0	8	1	10	24	6	6	65	9	24	8	9	19	47	135	3	254	10	15	22	70	1	67	225	10	420	3	2	26
LOC116916424	9	4	3	3	3	6	9	6	1	44	0	2	2	3	1	0	2	10	0	0	0	1	2	2	1	0	0	6	2	5	5	0	0	4	6	0	22	5	3	0	11	0	3	11	1	34	0	0	3
LOC116916425	812	300	103	50	83	440	1014	998	795	4595	32	17	458	182	674	72	1357	2792	37	91	24	65	36	47	250	61	104	715	60	260	76	80	108	658	1045	21	2308	47	82	104	727	39	622	1278	221	3120	86	39	185
LOC116916426	47	38	4	0	6	108	31	81	6	321	0	0	10	2	1	1	106	120	3	5	0	0	0	1	21	0	0	30	2	8	14	12	9	25	82	1	153	0	8	5	23	1	17	131	11	196	0	2	17
LOC116916427	68	61	34	10	38	26	38	63	41	379	10	8	85	17	46	12	93	271	29	28	10	24	4	16	17	6	7	141	16	55	27	30	66	28	73	5	300	11	33	50	58	11	45	105	21	334	13	11	54
LOC116916429	13	3	0	0	0	1	1	4	0	22	0	0	5	3	0	0	0	8	7	0	2	0	0	0	0	1	0	10	0	9	1	0	0	0	2	0	12	0	3	1	5	0	1	1	0	11	0	1	4
LOC116916430	6	0	2	0	0	1	1	1	0	11	0	0	5	0	0	0	1	6	0	3	0	0	0	0	0	0	0	3	0	2	3	0	2	0	0	1	8	0	2	1	3	0	0	2	0	8	0	2	1
LOC116916431	176	86	34	42	42	152	363	397	214	1506	2	14	196	107	261	33	440	1053	29	21	3	62	27	55	121	49	109	476	21	134	52	67	83	293	318	48	1016	12	39	70	209	15	237	479	109	1170	4	12	57
LOC116916432	0	0	0	0	0	0	0	0	1	1	0	1	0	0	0	0	0	1	0	0	0	0	0	0	0	0	0	0	0	0	0	0	0	0	0	0	0	0	0	0	0	0	0	0	0	0	0	0	0
LOC116916434	0	0	1	0	0	0	2	1	3	7	2	0	3	0	2	0	2	9	0	1	0	0	2	0	0	0	2	5	0	5	0	1	0	0	0	0	6	3	0	0	3	0	0	4	0	10	1	0	0
LOC116916435	55	43	8	2	8	7	55	56	7	241	0	2	114	8	13	4	61	202	2	5	1	7	0	7	8	0	0	30	3	18	5	4	17	11	31	0	89	4	13	5	19	4	24	133	2	204	5	5	26
LOC116916441	0	0	0	0	0	0	0	0	0	0	0	0	0	0	0	0	0	0	0	0	0	0	0	0	0	0	0	0	0	0	0	0	0	0	0	0	0	0	3	0	6	0	1	2	0	12	0	0	0
LOC116916443	90	16	13	2	5	20	51	45	53	295	2	2	72	35	41	14	64	230	18	11	4	4	11	12	18	2	11	91	1	35	5	4	14	49	71	7	186	2	5	7	44	5	49	52	12	176	5	0	25
LOC116916445	90	58	37	8	27	30	59	45	41	395	1	2	73	22	64	15	116	293	3	12	4	17	8	8	25	7	12	96	11	54	24	16	46	40	82	3	276	6	27	32	65	4	107	79	21	341	16	3	58
LOC116916446	163	205	112	15	96	66	104	159	67	987	3	10	260	20	153	20	262	728	10	53	10	62	15	85	64	4	17	320	14	128	100	61	147	34	244	0	728	26	129	114	168	16	193	326	53	1025	31	8	266
LOC116916447	326	207	131	25	75	105	298	455	134	1756	10	15	266	55	239	36	464	1085	14	95	35	61	21	73	103	4	23	429	37	200	92	57	105	120	359	6	976	49	139	121	308	18	217	576	100	1528	35	24	207
LOC116916448	34	31	6	1	8	10	28	53	15	186	0	3	32	6	29	1	52	123	1	12	4	13	1	7	4	4	6	52	5	18	5	2	10	20	38	5	103	5	5	30	37	2	24	77	11	191	2	0	15
LOC116916449	45	22	13	11	6	36	67	104	38	342	1	1	68	30	92	15	105	312	5	8	0	19	9	15	15	9	21	101	7	35	9	17	19	72	73	4	236	6	9	23	66	6	39	141	42	332	0	4	22
LOC116916450	563	385	173	87	183	315	636	776	362	3480	38	35	754	189	650	110	1104	2880	60	117	40	237	70	159	252	91	189	1215	87	502	172	179	201	415	865	47	2468	69	226	258	760	60	546	1390	317	3626	67	60	245
LOC116916451	1663	1533	514	136	1129	630	1228	2271	539	9643	27	63	3206	146	1538	158	3270	8408	96	330	61	1139	140	851	658	51	208	3534	131	951	525	582	2334	526	2608	64	7721	202	755	1677	1603	103	1830	4744	526	11440	135	122	1489
LOC116916452	504	465	428	89	250	249	486	481	411	3363	84	73	406	202	439	97	641	1942	140	254	100	196	69	198	226	81	101	1365	181	608	341	151	272	397	549	38	2537	141	412	260	487	67	442	634	186	2629	165	116	546
LOC116916453	65	29	6	1	4	35	91	80	43	354	3	8	39	14	50	7	101	222	10	13	3	16	4	2	25	7	6	86	3	21	5	3	10	38	91	1	172	6	11	24	68	0	36	129	14	288	9	4	24
LOC116916454	536	243	84	62	87	322	963	1203	976	4476	30	41	422	313	873	75	1324	3078	51	75	38	139	85	63	261	153	310	1175	47	294	73	115	153	937	891	110	2620	48	69	174	663	37	468	1270	412	3141	46	32	123
LOC116916455	966	415	139	66	141	664	1839	1953	1271	7454	40	48	738	378	1392	201	2261	5058	58	124	67	205	91	128	442	199	337	1651	80	409	131	181	280	1283	1948	131	4443	65	96	241	1178	64	994	2372	561	5571	108	60	215
LOC116916456	74	59	27	3	34	28	56	77	19	377	0	5	136	5	79	8	119	352	4	9	0	29	7	27	15	0	5	96	3	32	18	25	68	14	103	1	264	11	27	49	60	2	103	181	28	461	8	4	70
LOC116916459	230	154	79	20	102	121	205	284	156	1351	14	19	263	70	251	54	454	1125	32	66	40	58	29	50	87	14	71	447	43	175	96	53	112	177	306	15	977	22	93	121	290	28	230	389	155	1328	27	37	121
LOC116916460	187	101	54	21	32	92	289	366	234	1376	12	12	156	54	267	25	368	894	15	40	24	30	11	27	101	20	41	309	36	97	30	32	66	214	283	20	778	23	57	46	175	8	173	407	99	988	32	14	66
LOC116916462	0	0	0	0	0	0	1	0	0	1	0	0	0	0	0	0	3	3	0	0	0	0	0	0	0	0	0	0	0	0	0	0	0	0	1	0	1	0	0	0	0	0	0	8	0	8	1	1	0
LOC116916468	490	322	115	53	71	251	469	763	350	2884	36	24	485	142	434	56	944	2121	45	87	41	121	38	90	156	34	92	704	41	232	72	68	176	320	626	16	1551	44	120	202	571	32	359	949	200	2477	92	43	178
LOC116916469	22	9	3	0	4	14	27	30	32	141	5	1	11	14	28	3	56	118	11	3	4	7	2	1	6	1	27	62	2	16	7	6	5	39	24	3	102	4	2	5	18	0	13	40	12	94	6	5	2
LOC116916470	214	165	115	62	61	158	136	167	237	1315	30	19	222	137	226	49	233	916	64	87	26	59	18	36	95	59	76	520	43	192	111	46	83	230	187	26	918	41	113	72	220	36	210	305	94	1091	49	38	121
LOC116916471	616	485	287	26	150	418	834	893	379	4088	52	35	406	92	331	57	667	1640	88	196	66	156	45	122	141	56	55	925	115	374	174	64	161	440	798	25	2151	117	259	150	419	55	424	1127	176	2727	127	88	409
LOC116916472	166	93	53	16	29	73	233	248	126	1037	10	11	160	27	145	16	303	672	12	42	5	30	11	42	52	15	15	224	17	95	40	24	41	151	228	9	605	17	70	48	146	14	161	335	44	835	26	11	107
LOC116916473	24	11	10	5	22	10	25	35	12	154	0	2	22	6	34	7	53	124	1	4	3	12	4	10	8	1	6	49	5	7	5	6	20	17	47	2	109	7	12	18	28	3	18	73	3	162	3	2	18
LOC116916474	1	0	0	0	0	0	2	0	3	6	0	0	1	1	1	0	0	3	0	3	0	3	0	0	2	1	2	11	0	1	0	0	2	1	0	0	4	0	1	0	0	0	4	0	2	7	0	0	0
LOC116916475	50	45	22	2	18	33	80	77	28	355	2	3	90	17	55	5	103	275	7	15	5	33	4	23	23	4	6	120	3	38	14	11	41	42	60	5	214	0	23	35	55	4	49	134	22	322	19	3	50
LOC116916476	279	117	112	22	50	101	251	275	121	1328	14	17	171	68	206	22	350	848	28	46	18	45	18	49	75	15	47	341	43	157	62	36	92	155	296	8	849	19	67	52	228	20	146	414	94	1040	29	12	79
LOC116916477	1414	499	212	82	278	611	1446	1833	631	7006	31	35	1364	228	1489	119	2639	5905	44	194	57	248	85	163	503	36	155	1485	70	559	156	174	417	615	2418	34	4443	89	192	356	1306	49	1373	3225	350	6940	81	46	471
LOC116916478	462	183	97	43	59	384	1225	1511	432	4396	36	28	528	170	700	53	1350	2865	26	58	40	75	38	75	181	31	135	659	55	181	98	66	165	598	1135	70	2368	46	80	169	613	22	387	1774	263	3354	65	24	131
LOC116916479	17	9	10	3	338	1	1	0	0	379	1	1	40	0	0	1	1	44	1	7	0	42	1	25	0	0	1	77	3	4	2	3	142	1	30	0	185	2	10	129	8	0	2	10	2	163	1	0	34
LOC116916480	11	8	12	0	7	0	6	12	8	64	0	2	11	1	7	0	12	33	0	1	0	3	0	4	3	0	1	12	1	2	2	2	6	10	18	0	41	0	6	5	14	0	1	21	0	47	0	2	7
LOC116916484	95	42	31	12	7	37	73	81	70	448	6	1	66	66	68	15	93	315	12	35	8	25	8	22	38	25	38	211	24	60	29	15	31	73	69	4	305	4	27	25	63	17	73	132	41	382	8	6	48
LOC116916485	105	48	11	3	3	54	68	78	39	409	0	0	54	15	39	10	62	180	4	8	3	9	9	5	19	1	13	71	1	35	15	8	13	72	53	5	202	4	7	12	68	2	25	107	15	240	4	0	16
LOC116916486	458	338	151	43	191	243	491	803	197	2915	28	34	589	130	450	89	797	2117	47	109	41	162	44	112	147	50	95	807	82	324	142	93	200	311	556	61	1769	62	147	233	563	39	293	1074	172	2583	71	39	279
LOC116916487	137	107	80	25	65	73	94	122	66	769	1	13	129	47	89	29	152	460	22	64	19	71	20	54	42	17	17	326	21	136	84	39	101	68	152	20	621	19	87	97	168	19	112	192	43	737	22	19	116
LOC116916488	33	32	4	20	9	26	49	42	62	277	0	6	51	27	80	22	87	273	18	5	2	49	12	19	42	50	90	287	0	71	15	25	42	76	65	36	330	3	20	24	28	12	44	74	75	280	9	18	9
LOC116916489	267	133	103	20	69	70	348	246	91	1347	42	15	287	114	213	44	113	828	32	56	31	47	12	64	94	43	13	392	23	157	80	42	107	260	405	8	1082	37	94	99	267	16	193	589	58	1353	32	33	177
LOC116916490	210	179	111	16	107	104	220	306	194	1447	15	15	219	69	257	34	363	972	29	89	16	95	34	73	100	39	55	530	34	161	78	62	118	162	314	4	933	30	107	113	218	23	192	430	123	1236	17	14	127
LOC116916491	737	281	118	68	143	478	908	1229	588	4550	40	30	548	198	634	51	1131	2632	41	109	39	100	46	80	256	66	114	851	73	305	119	97	169	571	722	38	2094	41	134	139	807	46	423	1220	211	3021	42	39	211
LOC116916492	201	106	81	3	59	34	91	80	29	684	19	10	107	17	61	13	88	315	16	50	21	20	14	38	19	5	7	190	21	119	55	24	65	43	88	1	416	29	64	76	107	12	92	140	23	543	14	14	128
LOC116916494	123	86	41	24	29	101	233	252	184	1073	21	24	108	68	201	30	354	806	16	49	17	32	18	20	84	14	46	296	18	89	36	23	34	194	234	14	642	24	36	32	171	14	140	309	63	789	21	19	67
LOC116916495	4	1	2	1	0	0	3	4	3	18	0	0	2	0	7	2	0	11	0	2	0	1	0	3	2	1	0	9	2	1	1	0	2	2	5	0	13	0	0	4	5	1	5	2	2	19	0	4	1
LOC116916496	108	98	69	23	66	96	75	96	96	727	14	14	183	98	165	76	110	660	100	68	13	58	26	43	103	81	55	547	44	162	102	45	87	200	168	26	834	32	90	104	173	29	143	109	94	774	42	39	120
LOC116916497	259	128	95	14	26	180	514	685	187	2088	12	21	173	61	354	23	637	1281	17	47	15	33	7	39	89	15	25	287	29	122	60	31	94	235	639	11	1221	29	65	63	235	11	264	883	45	1595	32	12	89
LOC116916499	288	100	9	2	24	91	136	144	7	801	0	3	279	18	68	2	39	409	14	9	2	11	1	12	18	0	1	68	3	59	31	6	55	11	209	0	374	4	5	34	223	2	103	500	0	871	2	2	76
LOC116916501	1	7	0	0	0	2	5	8	5	28	0	0	5	0	10	2	5	22	0	1	0	0	0	0	1	0	0	2	0	0	0	0	0	0	7	0	7	0	2	5	7	0	8	4	1	27	0	0	0
LOC116916502	0	0	0	0	0	0	2	1	0	3	0	0	3	0	0	0	3	6	0	0	0	2	0	0	0	0	0	2	0	0	0	0	1	1	1	0	3	0	0	4	2	0	2	1	0	9	4	0	0
LOC116916507	0	0	1	0	0	0	0	0	0	1	0	0	0	0	0	4	0	4	0	0	0	0	0	0	1	0	0	1	0	0	0	0	1	0	1	0	2	1	0	0	0	0	0	2	0	3	0	0	0
LOC116916508	176	117	89	20	91	61	81	84	55	774	10	14	153	29	120	18	131	475	18	48	20	82	17	62	38	8	14	307	36	128	75	36	101	51	116	13	556	36	66	62	125	16	112	207	55	679	42	25	117
LOC116916509	22	29	19	1	2	6	7	58	1	145	0	1	8	7	0	0	8	24	0	2	1	3	0	4	2	0	0	12	2	17	10	4	0	4	15	1	53	4	10	4	41	0	0	6	2	67	3	4	24
LOC116916510	0	1	7	0	3	1	0	1	1	14	0	0	1	0	2	0	3	6	0	2	0	1	0	1	0	0	1	5	0	2	0	0	0	1	3	0	6	0	1	0	2	1	1	2	2	9	1	0	3
LOC116916511	618	168	129	46	83	197	352	393	389	2375	39	27	333	283	329	68	452	1531	84	99	20	78	39	61	126	151	160	818	60	229	82	54	105	452	345	85	1412	16	55	105	419	44	224	499	191	1553	52	39	119
LOC116916512	176	82	62	13	25	129	343	390	202	1422	9	11	152	62	210	27	340	811	21	25	20	35	13	37	68	11	27	257	24	102	50	36	38	260	354	14	878	9	56	40	172	19	153	473	53	975	19	13	92
LOC116916513	1046	390	98	31	153	345	615	1237	315	4230	8	9	978	38	863	52	2142	4090	18	68	10	158	32	117	282	9	62	756	34	279	108	116	306	237	1690	10	2780	45	167	350	964	13	858	2171	219	4787	37	20	267
LOC116916514	9	1	0	0	0	1	6	4	0	21	0	0	6	0	0	0	2	8	0	0	0	0	0	0	0	0	0	0	0	4	0	0	0	0	4	0	8	1	0	0	0	0	0	4	0	5	0	0	4
LOC116916515	6	1	0	0	0	2	1	3	0	13	0	2	3	0	0	1	1	7	0	0	2	0	0	0	0	0	1	3	0	3	2	0	0	0	2	0	7	0	1	0	2	0	0	2	0	5	0	0	0
LOC116916516	85	54	32	6	51	21	29	72	14	364	0	2	100	7	41	9	95	254	0	24	7	35	6	16	22	3	6	119	2	47	30	11	50	24	69	0	233	4	27	53	79	1	40	119	14	337	10	2	81
LOC116916517	40	33	21	5	21	5	9	23	11	168	2	1	43	5	16	5	12	84	3	4	0	20	2	11	10	2	7	59	1	39	14	16	28	16	21	4	139	3	19	32	32	3	22	45	6	162	5	4	33
LOC116916518	2	0	0	0	0	0	1	0	2	5	0	0	2	0	0	0	0	2	3	0	0	0	0	1	0	0	0	4	0	2	0	0	0	0	0	0	2	0	1	0	0	0	0	1	0	2	0	0	2
LOC116916519	221	142	76	23	84	99	229	268	85	1227	9	13	228	31	182	17	350	830	11	60	12	72	14	51	63	9	29	321	25	125	74	53	108	89	336	9	819	31	87	88	214	8	176	489	80	1173	32	33	135
LOC116916520	210	77	55	14	57	124	299	543	183	1562	8	4	227	41	347	23	760	1410	12	40	11	49	18	31	76	15	40	292	15	80	31	38	75	211	400	14	864	20	44	70	305	12	170	660	115	1396	19	5	50
LOC116916521	263	56	32	1	25	41	114	96	22	650	0	4	158	45	68	14	53	342	10	10	4	20	5	12	23	5	9	98	1	72	8	10	26	47	174	5	343	5	29	33	101	4	76	170	12	430	0	2	51
LOC116916523	0	4	0	0	0	0	1	0	0	5	0	0	0	0	0	0	0	0	0	0	1	0	0	4	0	0	0	5	0	0	0	0	0	0	0	0	0	0	0	1	0	0	0	1	0	2	0	0	0
LOC116916524	206	154	80	32	125	78	202	275	112	1264	13	22	279	54	222	21	447	1058	15	82	22	75	21	87	90	7	29	428	36	137	78	61	109	132	285	15	853	32	91	92	175	13	150	461	94	1108	23	12	115
LOC116916525	62	15	10	13	2	36	142	110	71	461	6	9	50	26	80	0	85	256	2	7	1	16	4	13	30	11	14	98	12	33	18	3	5	88	126	10	295	12	10	17	56	3	58	144	31	331	0	2	29
LOC116916526	183	56	30	4	45	30	49	25	4	426	6	4	46	21	6	7	6	96	24	57	1	8	5	7	4	0	0	106	11	103	28	12	27	14	126	0	321	17	32	30	95	7	9	45	2	237	7	13	93
LOC116916527	202	30	3	0	30	7	48	14	5	339	2	1	50	4	14	4	0	75	7	5	0	3	1	0	3	0	0	19	1	21	10	5	12	22	98	0	169	7	15	11	82	2	12	70	4	203	0	4	21
LOC116916531	193	73	34	5	27	90	161	303	69	955	5	2	160	41	131	9	208	556	13	12	7	34	5	23	51	22	38	205	10	78	25	26	49	126	186	5	505	6	39	46	160	6	98	399	33	787	21	3	56
LOC116916532	588	458	314	133	181	237	433	456	90	2890	101	73	506	333	112	57	68	1250	152	260	74	187	50	163	70	82	29	1067	227	522	245	135	124	293	345	27	1918	140	278	161	623	81	78	372	68	1801	174	88	295
LOC116916533	295	201	126	50	129	221	337	484	256	2099	20	28	431	92	367	45	719	1702	40	98	30	94	30	87	131	19	104	633	73	257	123	85	191	167	470	11	1377	48	134	189	362	42	304	748	196	2023	70	37	178
LOC116916534	132	126	66	9	40	74	165	224	91	927	5	5	188	27	180	11	373	789	12	31	4	45	15	14	70	22	33	246	11	108	33	29	67	102	260	9	619	17	58	57	177	10	157	419	79	974	10	3	87
LOC116916535	1288	208	84	33	87	586	1485	1997	525	6293	18	17	635	127	857	43	1901	3598	18	64	13	70	26	49	246	21	55	562	52	185	63	43	172	560	1468	12	2555	37	64	143	894	39	566	2284	203	4230	42	34	199
LOC116916536	228	66	34	36	35	158	423	481	267	1728	11	11	204	81	354	28	536	1225	14	40	23	57	18	29	115	34	69	399	15	93	28	38	37	267	394	28	900	22	29	58	289	19	220	640	135	1412	14	9	50
LOC116916537	86	38	10	6	25	45	153	125	131	619	5	7	64	53	116	11	155	411	16	12	3	16	8	27	43	25	29	179	11	58	19	13	11	192	148	37	489	10	16	28	96	9	69	170	52	450	3	3	15
LOC116916539	131	77	16	6	19	57	142	116	81	645	1	1	160	30	184	18	101	495	3	16	5	40	5	7	74	12	12	174	1	61	27	16	47	108	144	7	411	8	16	37	95	6	291	219	29	701	4	6	48
LOC116916540	69	49	17	5	23	47	32	52	21	315	1	4	32	37	26	3	51	154	9	13	6	6	6	3	16	4	0	63	1	66	45	18	22	29	69	0	250	3	28	9	93	0	26	58	18	235	13	6	60
LOC116916541	940	403	169	58	185	447	914	1501	621	5238	20	27	827	187	1011	144	1778	3994	43	153	50	223	67	141	348	80	172	1277	89	394	140	161	295	616	1526	49	3270	71	157	286	1061	40	911	2295	315	5136	42	50	280
LOC116916542	156	207	11	138	212	165	358	430	427	2104	1	2	681	296	742	155	773	2650	46	29	3	407	76	136	422	263	416	1798	4	290	83	259	412	531	579	159	2317	4	52	360	451	93	635	973	556	3124	2	10	63
LOC116916545	3	0	0	0	0	0	4	0	0	7	0	0	0	3	0	0	0	3	0	1	0	0	0	0	0	0	0	1	0	0	0	0	0	0	0	2	2	0	0	0	1	0	4	4	1	10	0	0	0
LOC116916547	0	0	0	0	0	0	0	0	0	0	0	0	0	0	1	0	0	1	0	0	0	0	0	0	0	0	0	0	0	0	0	0	0	0	1	0	1	0	0	0	0	1	0	0	0	1	0	0	0
LOC116916552	106	137	49	11	33	71	135	155	102	799	11	12	151	43	126	20	242	605	16	50	15	39	16	35	51	22	15	259	17	90	39	26	82	112	217	10	593	14	53	54	130	9	136	326	51	773	27	15	103
LOC116916553	148	80	76	5	34	35	67	87	77	609	19	16	84	20	44	9	72	264	31	56	33	13	17	36	14	10	11	221	22	119	51	23	31	54	108	7	415	36	45	37	107	18	65	85	31	424	29	13	109
LOC116916554	357	155	114	33	61	167	331	538	199	1955	7	9	260	74	246	12	521	1129	35	76	38	40	24	34	91	11	48	397	51	164	99	55	102	182	405	16	1074	41	110	72	327	14	169	550	99	1382	52	22	171
LOC116916555	144	69	21	23	25	62	151	225	106	826	10	6	130	28	123	29	279	605	9	44	7	36	14	19	47	8	17	201	12	68	16	18	53	70	188	6	431	20	32	36	124	14	115	241	48	630	25	21	56
LOC116916556	40	20	9	4	15	44	92	111	66	401	3	1	40	32	54	22	71	223	5	10	4	5	3	3	25	34	17	106	6	30	11	4	18	134	72	13	288	2	14	14	33	5	45	100	14	227	3	5	4
LOC116916557	167	346	6	84	764	112	131	257	136	2003	9	20	1880	94	526	124	1185	3838	59	61	16	1345	68	536	233	62	321	2701	25	222	100	470	1773	194	629	283	3696	21	132	1225	298	153	779	1409	366	4383	5	47	130
LOC116916558	23	13	0	2	0	51	99	65	28	281	1	0	31	5	5	0	37	79	2	1	0	5	0	3	3	0	2	16	2	12	1	0	8	68	76	0	167	0	3	4	35	1	11	81	3	138	0	4	11
LOC116916559	3	2	1	0	0	2	0	2	0	10	0	0	1	0	2	0	1	4	0	0	1	1	0	0	0	0	0	2	0	0	0	0	1	0	2	0	3	0	0	0	0	0	2	1	0	3	0	0	2
LOC116916560	0	1	2	0	0	0	0	1	1	5	0	0	1	0	0	0	0	1	0	2	4	0	1	0	0	0	0	7	3	3	2	1	5	0	1	0	15	0	2	1	3	0	0	1	0	7	0	0	2
LOC116916561	141	115	50	8	92	59	108	184	42	799	0	2	205	14	79	12	209	521	5	25	5	46	4	22	36	4	12	159	11	72	43	21	123	44	171	2	487	16	61	85	102	4	115	248	32	663	19	9	152
LOC116916562	47	42	15	2	5	200	24	108	92	535	1	2	66	41	36	0	99	245	6	14	7	2	0	2	30	6	21	88	8	31	15	19	7	90	52	2	224	5	15	14	66	14	19	59	28	220	2	4	10
LOC116916563	593	242	106	25	58	772	587	949	657	3989	3	6	975	325	679	64	1398	3450	49	33	14	83	16	58	332	72	111	768	15	309	103	114	203	642	760	49	2195	16	52	150	702	28	646	1047	281	2922	6	24	162
LOC116916565	10	3	0	6	1	7	19	30	12	88	1	0	21	3	37	5	48	115	3	3	0	12	2	4	11	2	4	41	1	6	8	14	26	10	26	6	97	0	1	8	24	2	27	49	25	136	0	3	5
LOC116916566	5	5	0	1	4	3	13	21	18	70	0	2	11	5	19	2	31	70	1	0	0	0	4	3	11	2	6	27	0	4	1	1	1	8	26	3	44	4	1	4	16	1	11	34	9	80	0	1	3
LOC116916567	33	18	1	1	6	41	83	76	31	290	0	1	67	6	65	8	171	318	1	1	3	5	4	7	28	0	4	53	1	13	7	9	9	44	94	0	177	1	4	14	50	1	149	232	26	477	1	4	8
LOC116916568	0	0	0	0	0	14	0	0	0	14	0	0	0	0	0	0	0	0	0	0	0	0	1	0	0	0	0	1	0	0	0	0	0	0	0	0	0	0	0	0	0	0	0	0	0	0	0	0	0
LOC116916569	0	2	0	0	0	0	1	0	0	3	0	0	1	0	1	0	1	3	0	0	1	0	0	4	0	0	2	7	0	0	0	0	0	0	3	0	3	0	0	0	0	0	0	8	0	8	1	2	0
LOC116916571	132	113	50	18	44	84	130	215	67	853	9	12	216	40	147	17	265	706	13	38	12	47	18	33	58	17	45	281	14	91	45	47	99	84	191	15	586	12	61	60	144	24	123	351	73	848	19	15	99
LOC116916572	0	0	1	0	0	0	0	0	0	1	0	0	1	0	0	0	2	3	0	0	0	0	0	0	0	0	0	0	0	0	0	0	0	0	0	0	0	0	0	0	0	0	0	2	0	2	5	0	2
LOC116916573	104	64	33	9	39	123	271	221	122	986	11	5	170	33	190	33	233	675	21	23	16	25	8	21	71	19	16	220	29	43	28	31	45	198	277	5	656	12	25	48	103	10	221	442	25	886	20	9	52
LOC116916574	149	79	74	7	32	55	155	139	62	752	0	4	108	34	137	12	157	452	11	25	11	22	8	15	38	8	12	150	12	92	22	17	36	68	210	4	461	14	33	34	168	2	82	271	26	630	2	11	102
LOC116916575	129	100	54	5	15	232	222	252	169	1178	7	0	156	36	72	21	547	839	5	9	27	15	7	11	97	8	13	192	7	34	8	10	48	152	288	4	551	6	16	30	143	14	327	426	98	1060	31	21	49
LOC116916576	0	0	0	0	0	0	4	1	2	7	0	0	0	0	0	1	0	1	0	3	0	0	0	0	0	0	0	3	0	0	0	0	0	1	0	0	1	1	2	0	0	0	1	1	0	5	0	2	0
LOC116916577	150	148	77	3	3	575	351	372	73	1752	0	4	54	40	32	7	297	434	7	18	3	2	2	6	38	5	19	100	0	23	17	5	5	154	241	5	450	5	13	9	124	1	72	367	38	629	16	8	33
LOC116916579	19	5	4	1	4	10	18	40	14	115	0	0	32	4	27	2	106	171	0	1	0	10	5	1	8	0	13	38	0	12	4	3	7	7	50	2	85	0	1	19	40	2	32	52	19	165	2	1	6
LOC116916580	4	2	0	4	4	2	13	18	12	59	2	0	18	4	22	5	24	75	0	1	1	10	1	3	12	8	14	50	1	2	1	3	0	20	20	8	55	0	1	0	9	1	15	42	3	71	2	0	3
LOC116916582	90	54	42	15	16	36	81	64	64	462	18	15	54	23	53	34	64	261	14	53	22	21	9	20	25	18	13	195	22	80	24	8	32	81	90	1	338	14	51	34	60	6	72	115	24	376	8	10	52
LOC116916585	92	43	13	3	15	23	56	47	54	346	8	3	44	17	57	12	41	182	4	16	7	21	4	12	13	10	9	96	12	39	20	5	14	53	54	4	201	4	26	19	47	5	49	77	11	238	22	6	34
LOC116916586	37	30	5	5	11	3	43	27	24	185	1	0	16	8	25	3	28	81	4	4	6	3	0	5	13	4	5	44	3	23	6	2	2	33	39	7	115	3	6	4	33	3	23	40	5	117	2	0	17
LOC116916587	78	36	8	1	7	14	37	26	18	225	6	3	35	21	10	6	29	110	7	15	2	3	5	2	10	6	5	55	12	18	6	6	3	26	29	1	101	1	7	12	32	1	17	46	2	118	4	2	37
LOC116916588	22	15	5	0	2	6	16	6	9	81	6	2	17	9	8	4	5	51	7	11	1	5	1	3	3	1	3	35	5	14	7	0	5	16	10	0	57	3	8	0	17	7	16	14	3	68	3	8	12
LOC116916589	0	0	1	0	0	0	1	2	1	5	0	0	0	0	2	0	3	5	0	0	2	0	0	0	0	0	2	4	0	0	1	0	0	1	0	0	2	0	0	0	0	0	2	5	0	7	0	0	0
LOC116916592	0	5	2	6	7	141	5942	2769	8771	17643	1	1	12	10	10099	2722	3361	16206	0	3	4	5	13	13	1712	752	454	2956	2	3	1	13	233	4702	15021	303	20278	4	9	90	16	4	6716	12310	2717	21866	9	0	2
LOC116916593	238	155	51	11	54	97	226	501	86	1419	2	3	291	23	181	15	558	1073	10	19	3	46	12	49	52	9	12	212	20	91	35	25	79	82	335	2	669	18	63	89	304	4	140	671	45	1334	20	10	147
LOC116916594	71	53	34	0	11	26	64	93	31	383	3	1	69	17	43	5	114	252	2	13	3	15	5	11	10	2	7	68	4	34	32	17	18	25	63	0	193	4	23	29	57	4	54	148	16	335	1	4	66
LOC116916595	208	127	74	18	40	85	197	255	140	1144	8	8	170	38	239	20	322	805	18	28	7	66	18	34	65	18	26	280	25	121	47	30	63	95	304	9	694	26	49	60	207	11	181	390	79	1003	49	7	115
LOC116916596	242	156	62	22	41	177	389	493	218	1800	28	19	237	64	334	20	597	1299	19	45	19	81	13	51	105	35	65	433	40	129	51	36	86	224	474	32	1072	38	62	80	259	26	188	680	129	1462	26	14	82
LOC116916597	33	6	1	0	0	16	51	67	22	196	0	3	36	0	46	1	93	179	1	0	5	1	3	2	17	1	1	31	0	6	4	1	9	12	58	0	90	2	2	9	34	0	30	133	9	219	2	4	11
LOC116916599	13	7	3	0	8	26	46	45	22	170	0	0	13	1	41	2	58	115	0	5	2	4	0	0	4	0	4	19	2	6	8	1	1	20	51	0	89	1	4	6	18	1	33	90	9	162	1	0	5
LOC116916600	0	0	0	0	0	0	0	0	0	0	0	0	0	0	0	0	0	0	0	2	1	0	0	0	0	0	0	3	0	0	0	0	0	0	0	0	0	0	0	0	0	0	0	1	0	1	0	0	0
LOC116916603	196	146	102	26	34	65	117	124	135	945	26	20	165	87	160	35	115	608	67	86	25	78	36	40	79	75	79	565	33	199	88	46	106	181	163	37	853	21	113	48	172	25	154	175	99	807	30	29	141
LOC116916604	583	291	148	30	68	327	593	712	403	3155	24	22	410	183	515	38	749	1941	62	138	40	80	32	49	212	96	98	807	33	433	136	85	131	597	686	56	2157	42	126	146	528	15	467	810	254	2388	48	11	245
LOC116916605	0	0	2	0	0	0	0	0	0	2	0	0	0	0	0	2	1	3	0	2	0	1	0	1	0	0	1	5	0	0	1	0	1	1	1	1	5	0	0	0	0	0	1	6	1	8	0	0	0
LOC116916606	163	103	80	25	54	42	61	63	52	643	43	20	91	38	30	10	48	280	63	90	22	51	13	25	15	8	2	289	67	157	78	23	22	79	88	3	517	29	84	48	129	15	31	73	21	430	16	13	99
LOC116916607	25	17	10	2	2	2	49	29	29	165	1	1	34	10	52	11	43	152	4	13	3	5	4	5	13	4	5	56	2	28	5	11	18	21	65	1	151	1	8	12	27	3	52	92	4	199	1	3	20
LOC116916608	16	19	4	3	5	19	37	40	47	190	1	2	34	16	45	5	62	165	3	9	2	3	1	10	15	16	13	72	1	14	13	10	18	40	42	7	145	3	5	7	46	3	26	60	25	175	3	7	15
LOC116916609	4	1	0	0	0	3	1	0	2	11	0	0	1	3	2	2	1	9	0	1	0	3	0	1	0	0	0	5	0	1	1	0	4	1	6	0	13	0	1	2	5	0	3	7	0	18	1	0	1
LOC116916610	0	0	3	1	0	0	2	0	3	9	0	0	1	0	1	0	0	2	0	2	0	1	0	0	1	0	0	4	0	2	0	0	2	0	5	0	9	0	0	0	1	0	6	8	0	15	0	0	0
LOC116916611	0	0	0	0	0	0	2	4	2	8	0	0	1	1	3	1	2	8	2	1	3	0	1	1	0	0	0	8	2	2	3	0	4	0	6	1	18	2	3	4	0	0	2	4	0	15	0	0	2
LOC116916612	208	143	102	10	48	36	109	89	39	784	22	11	114	43	70	13	47	320	37	58	33	69	16	31	30	20	29	323	38	154	107	48	71	57	77	7	559	45	97	42	134	15	26	125	31	515	39	26	108
LOC116916613	162	141	87	48	133	165	847	973	356	2912	8	17	411	117	674	105	917	2249	12	57	11	121	40	78	241	39	104	703	30	170	89	85	190	401	1214	42	2221	15	114	166	489	27	457	1794	205	3267	38	15	156
LOC116916614	421	354	237	46	149	84	165	134	58	1648	64	53	268	200	71	38	56	750	138	256	52	114	54	91	58	55	94	912	66	515	338	114	163	192	145	50	1583	128	230	122	370	61	69	154	91	1225	109	52	332
LOC116916615	108	47	33	13	34	39	76	114	43	507	3	5	87	17	67	16	155	350	12	13	11	29	3	21	18	5	19	131	7	53	30	21	40	38	106	0	295	14	44	48	113	7	86	197	25	534	12	8	65
LOC116916616	404	196	116	33	123	140	201	333	112	1658	14	16	356	49	180	31	349	995	29	104	49	82	29	83	77	18	55	526	29	197	131	49	184	121	283	9	1003	30	123	184	414	15	200	839	48	1853	54	55	239
LOC116916617	41	26	37	11	25	27	9	10	16	202	6	3	26	7	12	7	19	80	10	29	13	27	4	11	10	5	15	124	23	42	14	10	10	8	14	0	121	15	17	8	23	6	12	35	14	130	8	10	34
LOC116916618	76	40	20	0	23	28	36	66	10	299	0	1	51	11	35	8	67	173	3	9	3	17	4	19	24	5	6	90	4	33	12	6	24	22	43	6	150	6	11	47	114	5	42	155	22	402	2	4	59
LOC116916619	1570	828	379	185	399	902	2054	2976	1635	10928	63	106	2008	837	2338	276	3657	9285	162	319	85	556	182	274	871	311	736	3496	150	1129	470	431	844	1873	2946	256	8099	144	344	676	2524	117	1738	4942	1213	11698	170	126	604
LOC116916620	38	40	10	4	8	10	21	26	8	165	3	3	57	9	15	5	33	125	6	10	4	11	0	14	4	7	5	61	4	20	8	10	19	11	39	4	115	5	19	18	55	2	26	127	7	259	4	3	57
LOC116916621	1378	685	263	90	280	731	1008	1820	525	6780	29	47	1368	242	1055	119	2078	4938	74	140	31	324	88	171	382	52	173	1435	77	672	198	224	474	495	1405	29	3574	81	256	429	1640	67	894	2560	432	6359	82	51	461
LOC116916622	140	154	34	5	12	308	153	254	86	1146	3	3	66	40	50	23	253	438	17	36	11	15	14	18	221	13	33	378	8	125	38	19	64	204	310	12	780	8	41	40	135	10	184	385	130	933	22	11	57
LOC116916623	24	13	0	1	2	15	13	38	3	109	0	3	2	0	2	0	39	46	0	0	0	0	0	0	6	0	0	6	0	6	3	2	3	2	31	0	47	2	7	0	7	0	6	76	2	100	3	0	14
LOC116916624	34	27	5	3	24	7	31	41	14	186	2	2	63	11	30	8	85	201	5	4	1	23	4	12	12	5	25	91	5	24	8	8	35	20	38	1	139	7	12	30	39	2	43	154	14	301	9	1	34
LOC116916625	287	190	131	27	65	154	299	491	136	1780	10	14	247	50	255	25	546	1147	18	86	18	90	32	54	101	10	43	452	53	231	87	67	91	105	414	7	1055	42	120	88	351	26	211	585	109	1532	30	19	172
LOC116916626	222	155	109	40	76	218	325	265	251	1661	36	24	280	207	307	77	477	1408	51	78	36	112	40	68	183	144	147	859	41	205	101	99	145	441	380	73	1485	36	98	110	277	27	352	451	256	1607	40	27	128
LOC116916627	44	54	13	0	49	17	46	93	14	330	0	3	74	7	29	5	111	229	4	6	5	22	2	14	9	0	10	72	6	25	12	10	40	11	72	1	177	7	21	46	44	2	28	152	5	305	8	1	37
LOC116916628	6	5	15	0	1	2	10	9	4	52	0	1	10	5	3	0	13	32	0	3	0	2	1	1	2	0	2	11	4	5	0	4	4	1	9	0	27	0	2	7	3	0	3	16	1	32	0	0	7
LOC116916629	9	8	3	3	5	4	15	18	12	77	0	0	14	9	18	4	25	70	0	5	0	10	0	1	6	1	4	27	0	5	2	7	18	8	20	2	62	0	8	7	25	2	10	38	1	91	0	3	7
LOC116916630	3	1	0	0	0	0	6	3	0	13	1	0	2	0	1	0	2	6	0	3	0	0	1	1	1	0	0	6	0	3	2	0	0	3	1	1	10	0	1	0	4	0	7	1	0	13	0	0	1
LOC116916631	77	43	24	4	59	19	44	65	13	348	3	2	106	2	50	6	91	260	1	17	1	33	6	29	19	2	7	115	8	27	12	22	63	14	74	0	220	6	34	54	68	4	40	158	17	381	6	5	41
LOC116916632	341	236	193	52	86	208	327	375	309	2127	42	37	321	181	446	70	480	1577	85	149	69	103	37	89	165	133	104	934	71	366	126	78	174	423	424	43	1705	45	164	157	417	66	293	630	204	1976	85	38	246
LOC116916633	42	6	2	0	0	12	59	37	19	177	2	1	32	5	73	8	52	173	2	0	0	7	1	0	16	3	3	32	1	3	0	6	12	36	105	1	164	0	0	10	36	0	76	120	6	248	0	0	5
LOC116916634	221	181	144	31	110	117	165	192	134	1295	18	17	219	71	135	41	251	752	59	105	23	71	28	50	56	34	45	471	57	181	132	74	92	152	196	21	905	26	119	107	191	29	169	264	84	989	43	49	168
LOC116916635	34	23	9	0	18	24	66	88	23	285	0	4	33	5	44	4	89	179	0	5	3	10	0	11	17	3	7	56	3	23	2	3	15	22	71	0	139	3	9	15	62	0	29	145	3	266	7	5	17
LOC116916636	326	187	126	40	100	96	209	210	148	1442	19	21	322	67	297	45	367	1138	14	92	10	132	32	59	106	20	52	517	39	223	88	93	134	159	269	13	1018	38	127	161	326	29	214	439	110	1444	30	11	197
LOC116916637	77	34	16	6	27	80	170	242	110	762	2	9	145	11	191	25	463	846	2	21	5	41	14	26	59	3	25	196	4	49	13	32	46	101	362	14	621	5	16	49	190	14	123	439	56	892	2	7	16
LOC116916638	11	3	16	0	7	1	2	2	1	43	0	0	1	0	0	0	4	5	3	1	1	0	0	1	0	0	0	6	3	2	10	3	6	1	3	0	28	0	5	0	3	0	2	6	0	16	1	0	4
LOC116916639	237	140	132	23	24	67	63	324	6	1016	14	4	46	51	22	4	137	278	31	84	23	28	8	15	41	2	19	251	29	140	166	82	50	108	115	5	695	27	104	25	196	19	19	116	70	576	44	25	159
LOC116916640	3	0	0	0	0	0	0	1	0	4	0	0	0	0	1	0	0	1	0	0	0	0	0	0	0	0	0	0	0	0	0	0	0	0	1	0	1	0	4	0	1	0	0	0	0	5	0	0	3
LOC116916642	288	197	133	23	40	225	221	168	235	1530	38	27	123	115	118	42	340	803	45	112	39	48	18	36	91	52	35	476	25	204	116	51	58	291	216	25	986	38	107	38	313	18	227	277	121	1139	76	15	130
LOC116916643	1516	724	470	169	284	552	1187	1381	807	7090	58	52	1044	443	880	175	1557	4209	238	266	119	319	105	165	426	275	319	2232	131	1001	393	217	391	1215	1357	105	4810	98	374	450	1282	92	922	1657	403	5278	138	95	708
LOC116916644	222	176	76	47	74	127	159	191	115	1187	7	11	337	75	152	36	255	873	23	47	22	82	20	58	75	12	47	386	25	135	91	62	167	122	245	22	869	25	82	102	187	14	190	325	106	1031	48	37	145
LOC116916645	34	35	10	17	15	29	30	46	86	302	7	8	69	22	83	26	66	281	6	17	4	40	20	15	25	14	52	193	16	47	16	22	22	34	51	19	227	9	33	18	43	15	77	124	67	386	15	15	28
LOC116916646	319	127	38	23	47	179	375	491	140	1739	5	7	289	74	257	28	466	1126	20	24	5	54	15	37	80	16	51	302	17	111	34	41	94	203	340	23	863	17	36	87	288	9	231	613	118	1399	15	15	106
LOC116916648	4	3	1	0	4	1	2	0	2	17	1	0	6	1	0	0	4	12	2	1	0	4	0	3	3	1	1	15	3	6	1	7	5	0	2	1	25	1	3	3	3	1	2	2	3	18	0	0	5
LOC116916649	29	14	9	0	6	27	51	64	14	214	1	0	56	5	22	5	93	182	0	3	0	10	1	4	5	1	4	28	6	14	8	5	21	25	69	3	151	9	17	31	40	0	21	148	3	269	4	3	20
LOC116916650	166	143	66	32	39	94	184	228	218	1170	14	20	229	59	191	51	344	908	48	76	30	105	23	58	76	41	98	555	32	136	61	60	126	169	178	42	804	38	79	72	117	25	192	409	101	1033	22	38	88
LOC116916652	4	0	0	0	1	20	3	3	2	33	0	0	2	0	2	2	0	6	3	1	2	0	0	3	1	0	0	10	0	1	0	0	0	1	2	0	4	3	6	0	0	4	1	3	0	17	3	0	3
LOC116916653	1	0	0	0	1	0	0	0	0	2	0	0	0	1	0	0	0	1	0	0	0	0	0	0	0	0	0	0	0	1	0	0	3	0	0	0	4	0	1	0	2	0	0	0	0	3	0	0	0
LOC116916654	93	63	21	14	7	46	74	73	37	428	8	6	74	27	63	13	93	284	2	11	3	26	11	9	38	18	30	148	3	71	38	27	41	45	68	6	299	8	32	24	71	15	77	137	48	412	7	4	46
LOC116916655	613	422	276	28	87	444	697	473	283	3323	65	44	314	180	326	147	498	1574	93	205	98	116	23	78	351	87	44	1095	93	477	240	71	147	658	707	59	2452	78	265	91	289	43	742	858	139	2505	161	73	264
LOC116916656	18	21	6	1	12	8	13	36	3	118	0	0	38	2	16	4	37	97	0	3	0	6	0	5	5	0	0	19	3	8	4	4	24	5	48	0	96	4	6	19	36	1	8	75	1	150	1	0	16
LOC116916657	128	112	50	8	15	189	81	65	56	704	3	7	62	35	43	14	129	293	5	33	9	5	6	31	45	8	5	147	13	121	76	28	28	95	129	2	492	11	71	28	86	10	103	118	31	458	16	8	79
LOC116916658	26	7	7	1	7	2	12	17	9	88	0	1	14	4	8	2	9	38	9	4	5	4	1	0	0	2	10	35	0	18	0	0	8	3	12	0	41	0	4	6	15	3	9	5	4	46	0	3	14
LOC116916659	148	70	17	6	36	74	176	312	75	914	7	11	193	23	134	12	203	583	6	20	8	29	8	21	32	9	32	165	10	71	16	22	82	90	150	7	448	18	42	49	194	3	106	429	28	869	14	16	59
LOC116916660	5	3	1	0	0	0	0	0	0	9	0	0	0	0	0	0	0	0	0	3	0	0	0	0	2	0	0	5	0	4	1	0	0	0	2	0	7	0	0	1	2	0	0	0	0	3	4	0	4
LOC116916662	4	22	2	0	3	20	42	29	45	167	1	1	21	4	6	16	147	196	2	7	0	1	0	1	63	2	3	79	1	17	1	1	0	44	30	3	97	0	0	5	11	0	83	120	38	257	7	0	4
LOC116916663	43	22	10	1	8	38	60	96	16	294	3	3	77	4	52	3	110	252	2	7	2	11	0	5	13	3	3	46	7	18	4	5	28	34	58	1	155	1	12	30	41	0	31	176	11	302	5	2	33
LOC116916664	1	8	1	0	0	23	33	15	40	121	0	0	6	1	8	11	49	75	1	0	3	3	0	0	11	2	3	23	2	5	0	4	3	37	31	9	91	0	0	1	15	2	37	39	24	118	1	0	0
LOC116916665	3	24	5	0	0	41	23	46	26	168	0	0	8	4	1	6	71	90	6	3	0	0	0	2	41	0	0	52	0	20	0	1	2	11	46	2	82	2	3	3	8	0	39	79	21	155	12	1	2
LOC116916667	72	37	36	6	38	38	54	75	49	405	6	0	64	14	47	14	124	269	18	26	7	24	6	28	21	10	12	152	8	56	18	11	43	44	79	11	270	11	24	33	62	9	42	100	39	320	11	1	74
LOC116916668	10	9	1	0	4	17	15	22	8	86	0	3	7	2	4	0	24	40	0	5	0	2	0	1	2	1	12	23	0	0	4	3	2	4	8	1	22	0	4	6	4	3	6	27	4	54	9	2	4
LOC116916669	121	52	61	29	36	78	100	53	99	629	9	8	97	61	92	23	69	359	24	42	28	49	14	22	51	39	36	305	19	99	24	26	23	121	78	25	415	13	46	35	102	15	66	91	46	414	36	17	56
LOC116916670	239	155	140	27	74	104	228	275	127	1369	22	21	207	62	180	34	259	785	18	64	24	87	26	45	64	29	36	393	29	185	85	42	73	163	253	8	838	33	74	106	245	20	148	380	97	1103	33	29	136
LOC116916671	200	158	71	27	62	103	198	258	115	1192	10	15	216	67	162	15	333	818	8	45	14	69	20	70	64	42	70	402	20	155	50	40	129	163	223	22	802	15	71	111	178	18	136	465	62	1056	10	10	132
LOC116916672	269	135	61	34	79	176	256	372	147	1529	9	16	314	102	230	60	429	1160	46	63	18	135	27	48	113	30	84	564	23	124	93	47	155	246	328	52	1068	19	81	120	264	35	204	581	99	1403	28	38	149
LOC116916673	33	26	29	6	1	20	55	47	56	273	1	1	39	9	41	11	174	276	0	2	3	2	0	0	36	4	2	49	0	32	5	8	17	26	49	1	138	2	0	6	23	7	184	95	43	360	11	7	15
LOC116916674	281	93	150	22	93	68	131	118	55	1011	21	14	179	50	110	24	104	502	48	80	19	61	24	56	42	15	30	375	24	185	58	54	106	94	101	11	633	41	85	91	180	19	56	232	62	766	22	27	201
LOC116916675	37	32	10	1	18	22	30	42	13	205	0	0	36	1	34	5	44	120	3	6	1	9	5	3	6	5	1	39	3	13	10	8	27	8	70	0	139	4	26	11	24	0	37	100	8	210	5	0	36
LOC116916676	192	96	41	6	22	45	47	73	23	545	0	5	141	16	67	15	126	370	9	27	12	26	11	24	38	1	5	153	7	100	36	21	64	27	104	3	362	1	45	34	90	7	72	102	37	388	2	6	77
LOC116916677	93	45	0	11	27	59	242	225	151	853	1	2	249	71	300	30	364	1017	10	10	7	51	14	24	99	28	65	308	1	79	15	46	103	207	242	43	736	3	2	108	142	6	169	455	99	984	10	8	6
LOC116916678	151	95	91	23	59	70	96	91	95	771	5	3	96	59	79	18	88	348	38	64	12	27	28	40	54	17	18	298	19	151	57	21	36	140	111	10	545	18	68	44	161	26	87	107	29	540	12	13	91
LOC116916679	0	5	3	0	0	20	65	26	25	144	0	1	4	2	8	3	124	142	0	1	0	1	0	1	26	1	5	35	2	16	0	0	0	17	15	1	51	1	0	5	18	0	57	115	17	213	17	5	0
LOC116916680	92	37	21	3	40	56	97	147	32	525	1	1	112	13	60	9	164	360	3	22	3	29	1	17	16	4	13	108	7	34	27	23	46	48	123	1	309	8	28	52	128	2	71	241	29	559	6	13	47
LOC116916681	0	1	0	1	1	2	2	3	2	12	0	0	4	0	5	0	4	13	0	0	0	1	0	0	2	0	0	3	2	0	0	0	0	1	3	0	6	1	2	0	3	0	5	4	1	16	0	0	1
LOC116916682	243	161	77	21	41	178	260	253	339	1573	9	1	271	87	374	40	532	1314	17	47	11	29	10	27	150	49	25	365	20	127	47	48	99	416	385	9	1151	14	50	89	320	8	486	544	139	1650	19	5	115
LOC116916683	46	37	17	2	13	21	47	53	21	257	4	2	39	8	17	2	35	107	11	15	11	7	1	11	17	2	2	77	1	41	17	9	16	34	51	1	170	8	17	21	37	1	35	91	10	220	13	8	47
LOC116916684	0	0	0	0	0	1	0	0	0	1	0	0	1	0	0	0	0	1	0	0	0	0	0	0	0	0	0	0	0	0	0	0	0	0	0	0	0	0	0	0	0	0	0	2	0	2	0	0	0
LOC116916685	49	21	18	4	21	30	63	101	39	346	4	1	44	7	37	12	74	179	2	11	5	23	3	8	17	2	10	81	15	40	3	14	39	35	73	2	221	6	23	18	78	3	39	118	14	299	10	7	30
LOC116916686	266	117	51	24	76	89	304	335	152	1414	1	9	273	71	359	58	370	1141	21	30	17	43	22	28	194	7	44	406	12	139	57	58	132	198	670	11	1277	12	56	135	381	11	241	925	86	1847	28	8	78
LOC116916687	107	72	30	11	45	85	173	182	43	748	9	5	123	14	76	13	173	413	7	23	8	32	6	17	17	14	13	137	10	30	24	13	59	72	164	3	375	8	26	47	116	4	55	275	27	558	10	4	45
LOC116916688	63	14	4	5	8	29	120	108	42	393	0	2	63	30	38	6	95	234	5	11	6	7	2	13	13	2	1	60	10	14	12	7	31	69	106	3	252	3	6	24	40	4	41	202	11	331	7	0	23
LOC116916689	40	22	1	0	1	9	19	28	4	124	0	0	49	2	14	1	49	115	0	1	0	10	1	6	3	0	2	23	0	9	2	4	18	2	34	0	69	2	4	14	31	0	23	65	1	140	1	1	15
LOC116916690	28	7	0	0	20	1	8	9	0	73	0	1	23	1	6	1	1	33	1	3	2	5	1	16	1	0	0	29	1	5	4	1	6	4	15	0	36	4	12	6	6	1	5	33	0	67	2	1	16
LOC116916691	148	79	40	41	19	74	131	157	120	809	10	6	147	52	154	37	120	526	18	33	10	37	18	29	62	49	58	314	31	110	48	33	55	85	149	39	550	14	49	31	102	12	125	224	52	609	31	29	72
LOC116916692	263	241	111	42	111	124	264	368	176	1700	19	14	268	110	240	30	398	1079	58	95	36	65	28	70	77	32	48	509	31	256	106	81	111	215	382	26	1208	28	139	144	283	27	243	512	124	1500	28	25	169
LOC116916693	162	70	39	5	20	102	272	387	105	1162	4	6	132	25	216	23	395	801	5	25	4	26	16	26	58	7	27	194	20	54	24	25	42	131	282	9	587	21	22	38	170	3	116	419	59	848	18	8	46
LOC116916694	138	86	35	31	32	64	171	194	140	891	16	7	135	36	157	22	271	644	20	37	10	39	12	29	69	30	65	311	17	106	47	32	54	121	202	13	592	20	75	51	133	16	130	292	112	829	10	27	52
LOC116916695	3	5	0	4	0	2	11	7	15	47	0	0	16	3	10	8	23	60	2	0	1	3	1	0	4	2	16	29	1	9	2	2	8	11	12	1	46	0	2	4	13	1	13	18	3	54	0	0	0
LOC116916696	82	57	30	10	25	28	53	93	57	435	4	4	98	19	89	9	143	366	19	25	2	21	16	27	49	2	15	176	10	54	41	24	52	43	97	7	328	17	50	25	68	9	72	153	50	444	14	5	58
LOC116916697	122	36	11	1	4	21	52	38	25	310	10	5	35	15	16	3	54	138	1	9	9	2	8	6	10	0	7	52	0	29	5	3	12	43	46	2	140	4	11	4	31	4	43	59	4	160	9	3	33
LOC116916698	42	26	6	0	11	35	58	124	28	330	0	1	50	7	43	0	139	240	3	6	2	11	5	10	11	0	0	48	5	14	10	5	18	9	71	1	133	3	7	26	47	1	21	115	12	232	5	4	19
LOC116916699	4	0	0	0	0	0	0	0	0	4	0	0	0	0	0	5	0	5	0	0	1	0	0	0	0	0	0	1	0	0	0	0	0	0	1	0	1	0	0	0	0	0	0	2	0	2	0	0	1
LOC116916700	280	189	82	39	163	98	146	297	80	1374	8	16	476	48	218	55	593	1414	28	81	15	175	34	92	123	13	100	661	39	231	97	99	324	114	366	21	1291	40	77	265	342	32	281	569	162	1768	43	35	215
LOC116916701	456	434	162	60	193	268	773	1258	695	4299	25	25	1053	271	990	86	1751	4201	65	178	58	346	77	178	312	59	220	1493	60	434	153	212	433	607	977	64	2940	61	213	405	662	47	586	1700	411	4085	58	56	291
LOC116916702	210	95	36	6	30	137	271	371	98	1254	9	6	124	24	107	5	269	544	5	43	15	32	13	33	36	13	19	209	11	105	34	16	38	93	233	8	538	25	59	31	136	12	74	366	48	751	24	18	73
LOC116916703	107	41	18	7	14	59	112	130	101	589	8	7	77	37	124	9	130	392	9	5	12	10	8	24	41	22	18	149	12	46	12	20	20	108	130	8	356	3	15	28	105	10	64	212	30	467	10	15	43
LOC116916704	405	395	215	54	113	281	408	527	313	2711	22	31	461	175	432	36	592	1749	75	145	36	143	38	84	150	53	80	804	58	430	139	85	179	342	403	38	1674	67	182	175	469	48	254	654	181	2030	102	53	303
LOC116916705	38	23	44	3	17	20	25	60	24	254	1	0	52	3	73	11	98	238	3	11	3	20	5	24	23	4	11	104	8	37	13	13	51	17	88	2	229	8	23	31	43	3	58	112	15	293	4	1	30
LOC116916706	158	100	35	13	36	36	73	131	47	629	2	2	176	12	102	20	231	545	8	24	3	63	8	21	45	3	14	189	9	68	36	36	92	33	167	6	447	6	48	80	163	10	115	291	68	781	11	4	79
LOC116916707	42	28	0	15	23	41	87	147	108	491	1	0	112	51	122	12	192	490	8	6	1	40	18	19	61	56	66	275	0	46	7	28	87	111	89	18	386	1	3	57	135	9	101	266	93	665	0	6	6
LOC116916708	510	138	52	9	78	304	632	867	356	2946	9	9	365	116	462	35	1021	2017	14	23	12	50	14	38	161	34	79	425	16	132	36	46	146	376	1039	32	1823	14	33	124	505	6	418	1163	169	2432	9	9	105
LOC116916709	327	257	141	39	158	141	276	471	168	1978	12	19	427	79	329	42	708	1616	30	85	36	120	37	96	149	23	80	656	49	259	154	83	176	165	427	9	1322	51	107	182	339	26	293	716	148	1862	51	27	208
LOC116916710	467	307	215	35	88	233	370	477	305	2497	25	19	362	91	378	42	515	1432	39	126	41	83	35	88	140	24	37	613	71	276	148	67	151	237	524	7	1481	50	177	123	381	32	370	490	114	1737	53	39	282
LOC116916711	204	140	42	16	56	110	228	361	108	1265	3	7	227	25	182	16	557	1017	11	35	19	42	12	54	70	8	30	281	24	87	42	22	78	107	358	3	721	17	64	90	221	2	174	568	75	1211	13	5	112
LOC116916712	1002	413	114	70	164	544	1217	1566	904	5994	25	39	1099	439	1559	156	2103	5420	56	113	41	208	72	109	473	236	286	1594	37	421	120	169	336	1339	1446	120	3988	43	107	393	1253	54	905	2607	526	5888	41	28	221
LOC116916713	486	345	161	126	194	341	593	785	485	3516	51	46	585	263	667	154	1085	2851	105	129	90	211	92	150	312	157	363	1609	63	435	155	157	241	680	703	95	2529	59	175	276	594	87	548	1002	446	3187	69	66	226
LOC116916714	8	8	1	0	3	18	10	11	5	64	0	0	16	4	15	0	8	43	0	0	0	2	0	0	4	0	0	6	2	2	0	5	3	13	17	0	42	0	1	8	30	0	11	26	2	78	0	0	4
LOC116916715	57	50	22	8	11	24	73	88	38	371	6	4	43	19	44	6	98	220	4	22	8	10	3	5	22	5	6	85	10	41	20	5	21	38	61	5	201	9	25	18	47	1	55	87	17	259	3	6	38
LOC116916716	103	84	31	5	48	26	68	148	48	561	0	4	170	12	74	9	202	471	8	11	11	48	6	31	30	2	15	162	7	41	37	28	62	43	140	5	363	10	43	71	99	4	67	243	26	563	5	6	74
LOC116916717	1	0	0	0	0	3	1	0	0	5	0	0	0	0	0	0	0	0	0	0	0	0	0	0	0	0	1	1	2	0	0	0	0	0	1	0	3	0	1	0	0	0	0	1	2	4	0	2	0
LOC116916718	679	479	86	63	364	266	419	855	346	3557	7	17	2113	131	1020	133	2342	5763	53	72	18	770	105	330	443	35	324	2150	21	465	229	368	1065	389	1274	55	3866	37	128	825	862	85	968	2622	717	6244	20	48	313
LOC116916719	272	357	377	78	91	43	87	143	108	1556	36	32	255	76	95	21	136	651	109	210	63	100	34	59	24	12	50	661	60	527	289	200	175	71	199	27	1548	125	202	131	422	50	81	184	79	1274	48	72	369
LOC116916720	175	85	45	26	60	90	267	262	224	1234	21	12	179	101	201	52	279	845	27	45	17	59	17	33	89	66	133	486	20	109	62	51	94	272	281	48	937	31	36	56	177	18	242	392	149	1101	9	21	83
LOC116916721	26	24	4	9	19	28	30	45	24	209	0	0	27	28	53	10	47	165	5	4	4	16	3	10	15	9	29	95	4	25	7	12	27	38	55	16	184	1	7	14	31	5	27	61	19	165	0	2	12
LOC116916722	49	61	76	10	76	28	21	20	15	356	12	7	76	7	13	7	30	152	12	16	13	39	7	28	10	5	1	131	23	75	45	27	46	7	53	2	278	18	69	112	112	9	12	65	9	406	19	8	76
LOC116916723	22	19	6	3	6	40	67	54	70	287	0	0	70	7	56	11	185	329	1	8	2	9	1	1	29	1	4	56	3	10	11	1	23	42	112	6	208	3	10	13	54	2	173	125	32	412	5	7	13
LOC116916724	123	120	71	18	42	173	334	245	157	1283	17	27	121	91	197	69	157	679	30	41	21	23	11	26	102	65	22	341	58	125	74	40	53	348	412	21	1131	18	61	36	192	12	220	347	63	949	16	19	67
LOC116916725	573	325	96	75	114	658	669	951	509	3970	62	42	643	527	527	211	337	2349	158	155	31	143	75	133	492	260	282	1729	63	378	61	135	247	1025	694	219	2822	40	122	212	483	95	446	861	375	2634	47	57	237
LOC116916726	59	28	11	9	19	49	111	132	43	461	2	3	61	10	68	1	154	299	2	6	1	12	2	11	23	2	17	76	3	21	3	9	13	41	124	1	215	15	11	22	50	0	35	185	20	338	7	5	17
LOC116916727	94	77	37	17	55	53	95	125	120	673	6	7	139	36	143	32	186	549	19	29	9	61	20	42	39	14	39	272	14	73	40	38	69	64	134	19	451	22	64	49	82	27	142	186	70	642	13	14	45
LOC116916728	557	239	115	51	45	381	679	872	403	3342	22	24	353	156	402	59	912	1928	35	103	61	85	41	81	199	40	96	741	95	293	96	76	123	443	719	14	1859	46	128	120	446	49	429	834	214	2266	69	55	151
LOC116916729	863	353	171	58	107	482	946	1305	591	4876	27	31	550	176	720	71	1094	2669	65	139	40	159	60	90	251	40	123	967	94	390	164	97	211	518	987	37	2498	40	166	153	776	47	556	1219	251	3208	59	52	250
LOC116916730	378	104	40	6	16	127	146	168	70	1055	7	14	159	43	67	8	161	459	8	20	19	22	9	12	27	4	11	132	5	102	37	18	30	121	176	3	492	4	27	27	207	7	83	159	36	550	5	10	56
LOC116916731	3	0	1	0	0	0	1	1	0	6	0	0	2	0	1	0	2	5	0	0	0	4	0	0	0	0	0	4	0	0	0	0	0	1	2	0	3	0	1	0	0	0	0	1	0	2	0	0	1
LOC116916732	151	141	47	32	50	91	177	199	164	1052	4	12	191	70	225	38	274	814	32	59	4	68	31	39	90	49	78	450	24	150	58	48	131	178	236	38	863	12	61	98	231	32	169	331	112	1046	23	20	94
LOC116916734	108	32	27	6	14	57	133	136	130	643	13	5	51	24	51	16	126	286	11	23	5	18	1	6	25	13	10	112	8	47	18	9	29	80	104	6	301	11	24	13	82	6	84	132	20	372	4	4	39
LOC116916735	450	86	50	22	28	745	1057	1426	109	3973	13	22	316	54	287	26	801	1519	10	33	18	63	13	58	63	4	27	289	28	52	32	30	101	262	987	7	1499	45	64	97	366	4	244	2803	43	3666	41	28	98
LOC116916736	28	23	12	3	5	25	97	48	36	277	1	0	58	8	65	5	189	326	0	1	5	9	1	8	22	0	0	46	5	12	3	10	38	32	90	1	191	3	3	13	46	0	114	157	27	363	3	0	20
LOC116916737	4	0	0	0	0	0	4	0	1	9	0	3	3	0	2	0	0	8	0	0	0	0	0	0	0	0	0	0	0	0	0	0	0	0	2	0	2	0	1	0	1	0	0	14	0	16	1	0	1
LOC116916738	427	169	73	32	85	240	442	540	325	2333	15	20	261	140	262	44	643	1385	45	73	12	56	26	34	93	68	100	507	28	184	52	47	82	398	363	35	1189	23	65	116	326	20	236	530	123	1439	37	18	115
LOC116916739	4	7	5	1	4	14	21	24	22	102	0	0	15	2	31	4	52	104	1	5	3	9	0	1	8	1	3	31	1	2	3	3	14	7	37	1	68	1	6	8	15	0	25	54	5	114	0	1	7
LOC116916740	12	0	0	0	0	1	1	0	0	14	1	1	0	1	0	0	0	3	0	0	1	0	0	0	0	0	0	1	0	2	1	0	0	0	2	0	5	0	1	0	0	0	0	4	0	5	0	1	1
LOC116916741	75	146	140	12	103	15	17	15	4	527	14	17	81	14	12	5	14	157	30	69	14	40	14	67	3	0	0	237	39	147	105	33	60	6	55	0	445	52	118	99	82	6	9	31	9	406	32	14	168
LOC116916742	67	58	48	13	24	24	94	132	74	534	15	5	68	20	105	5	164	382	10	33	17	28	4	34	45	7	29	207	13	74	38	12	26	59	121	4	347	31	48	52	109	6	61	172	46	525	14	12	36
LOC116916743	40	14	13	4	5	27	61	73	25	262	4	1	36	13	46	8	100	208	6	4	0	5	1	2	8	8	6	40	2	15	6	3	12	27	72	2	139	3	2	12	46	0	23	104	22	212	2	0	21
LOC116916744	79	23	10	5	3	28	114	149	52	463	1	3	56	23	74	12	124	293	4	6	0	12	2	6	25	4	8	67	9	22	5	8	9	83	74	10	220	4	14	25	92	2	54	162	22	375	6	0	18
LOC116916745	236	87	57	12	52	164	487	661	162	1918	18	2	158	30	296	17	878	1399	12	48	10	48	25	32	82	5	25	287	31	82	48	25	54	151	654	8	1053	22	58	76	310	12	294	830	97	1699	29	5	102
LOC116916746	263	83	14	3	31	59	190	336	48	1027	1	3	201	3	100	9	409	726	3	15	2	23	2	14	29	0	4	92	4	18	15	10	32	37	295	1	412	8	11	39	148	2	132	499	14	853	8	1	67
LOC116916747	683	483	242	121	444	329	593	610	570	4075	62	102	492	276	951	188	819	2890	213	377	62	263	87	213	391	161	120	1887	160	921	363	162	305	675	987	32	3605	146	376	391	1071	139	866	866	271	4126	290	127	394
LOC116916748	0	0	0	0	2	0	1	0	0	3	0	0	0	0	0	2	0	2	0	0	0	0	0	0	0	0	0	0	0	0	0	0	0	0	1	0	1	0	0	0	0	0	0	0	0	0	0	0	0
LOC116916749	0	0	0	0	3	2	0	0	3	8	0	0	2	0	0	5	3	10	0	0	0	0	0	1	3	4	0	8	0	2	0	2	3	1	4	0	12	0	0	2	0	0	6	4	12	24	0	0	0
LOC116916752	31	22	16	3	25	9	29	16	15	166	5	4	30	7	15	1	29	91	3	11	3	4	2	8	6	2	3	42	5	9	9	7	9	24	32	2	97	6	19	14	21	1	40	24	9	134	7	3	24
LOC116916753	5112	1983	701	239	811	1952	3422	5195	2246	21661	109	71	4108	1143	3280	441	7101	16253	234	478	128	863	253	518	1326	130	539	4469	225	2015	724	627	1481	1804	5363	82	12321	197	736	1256	4514	241	3481	7371	1347	19143	174	175	1403
LOC116916754	99	36	29	7	30	98	121	185	72	677	4	6	80	18	126	9	213	456	4	28	8	27	16	12	27	6	11	139	11	45	18	24	27	85	149	12	371	10	31	22	122	3	62	220	31	501	10	8	37
LOC116916755	62	20	15	1	17	118	90	84	61	468	5	2	23	17	73	15	103	238	4	18	5	4	0	11	19	14	13	88	3	33	30	11	25	71	97	3	273	8	20	13	53	4	73	116	20	307	31	1	19
LOC116916756	88	26	3	3	14	43	113	208	22	520	2	2	94	4	87	4	256	449	0	9	0	12	4	11	26	1	5	68	7	20	10	3	24	28	204	1	297	5	7	29	77	2	74	310	22	526	0	6	22
LOC116916757	18	8	17	4	8	4	8	12	9	88	5	0	9	5	25	5	13	62	10	4	3	1	0	5	1	4	3	31	1	15	7	1	2	15	16	0	57	1	5	10	13	2	9	8	0	48	2	3	9
LOC116916758	271	111	72	37	78	149	267	343	134	1462	13	5	234	66	263	43	438	1062	20	47	14	68	31	65	93	20	64	422	22	163	63	72	108	148	322	15	913	32	73	87	242	16	194	470	116	1230	14	13	115
LOC116916759	101	38	34	11	14	53	139	175	68	633	4	7	102	27	139	11	266	556	6	13	0	35	7	9	36	8	23	137	15	40	22	12	34	112	153	24	412	0	24	37	138	4	77	215	35	530	6	9	41
LOC116916760	21	3	1	0	1	1	6	3	3	39	2	0	1	2	2	1	5	13	0	0	3	0	0	3	1	0	0	7	0	11	1	0	8	0	2	0	22	1	7	6	2	1	1	15	2	35	0	0	13
LOC116916761	13	2	4	0	6	0	4	4	1	34	0	0	1	3	1	0	5	10	0	0	0	0	0	0	1	0	0	1	0	1	0	0	0	2	4	0	7	0	1	2	2	0	4	7	2	18	0	0	4
LOC116916762	2	1	0	0	0	1	1	1	0	6	0	2	0	0	1	0	0	3	0	0	0	0	0	2	0	0	0	2	0	1	0	0	3	0	1	0	5	0	0	0	0	0	0	3	0	3	0	0	0
LOC116916763	457	192	66	50	78	371	1354	1440	660	4668	21	20	544	184	757	63	1887	3476	31	63	26	77	25	39	183	36	139	619	47	201	66	67	137	825	1223	59	2625	36	90	161	731	21	437	1648	238	3362	49	26	116
LOC116916764	635	232	107	45	79	331	852	1082	594	3957	32	49	351	169	545	62	1274	2482	40	123	61	105	53	72	180	46	115	795	66	291	93	74	120	588	901	34	2167	47	112	110	612	30	438	1071	305	2725	60	48	200
LOC116916765	21	11	3	0	1	5	4	15	4	64	0	0	53	1	5	2	46	107	0	0	0	3	0	1	1	0	1	6	1	0	2	3	10	5	28	0	49	0	2	9	6	0	13	46	1	77	0	7	8
LOC116916766	434	241	88	40	127	280	242	479	314	2245	26	13	384	134	297	54	745	1653	31	88	34	109	41	86	175	41	98	703	31	233	111	64	143	290	422	12	1306	37	101	113	526	42	290	581	233	1923	49	32	185
LOC116916767	531	320	24	37	197	395	663	1260	584	4011	3	6	1705	266	1467	146	3304	6897	81	39	8	337	94	79	403	102	391	1534	8	272	76	262	741	662	1607	137	3765	20	29	747	1062	48	986	2744	700	6336	15	16	81
LOC116916768	463	127	92	23	56	273	536	631	335	2536	32	32	191	101	313	42	575	1286	27	89	36	82	15	46	112	34	75	516	37	200	72	37	66	343	427	27	1209	43	73	64	353	17	218	538	140	1446	61	26	113
LOC116916769	20	6	1	8	8	12	67	95	79	296	5	2	40	26	82	11	100	266	4	9	2	9	9	3	32	23	27	118	3	11	5	5	10	65	74	14	187	0	7	22	60	9	60	100	22	280	4	3	4
LOC116916770	13	3	0	0	0	6	14	35	3	74	2	0	28	0	2	0	40	72	0	0	0	4	0	3	1	1	1	10	0	1	0	1	5	3	21	0	31	0	0	2	6	0	11	51	1	71	0	1	1
LOC116916771	101	37	20	6	11	41	106	153	44	519	4	6	80	28	73	13	144	348	6	6	9	5	7	13	48	25	16	135	14	34	15	15	23	140	150	12	403	3	14	26	88	3	74	149	37	394	9	11	23
LOC116916772	27	12	8	9	3	55	140	48	205	507	1	0	66	20	111	42	546	786	1	2	1	14	1	3	51	7	27	107	3	7	1	9	11	123	118	6	278	2	1	16	160	5	236	164	111	695	1	2	6
LOC116916773	148	82	44	33	40	109	216	268	184	1124	7	17	136	96	181	24	323	784	28	26	4	82	21	42	89	26	123	441	18	99	31	50	54	186	200	22	660	15	42	87	157	17	133	274	110	835	13	6	40
LOC116916774	319	143	64	37	59	234	768	774	579	2977	44	34	290	250	555	75	903	2151	73	83	40	84	44	24	204	117	206	875	42	172	72	55	97	751	616	91	1896	22	62	87	415	23	307	794	219	1929	47	20	74
LOC116916775	5	1	7	2	0	0	16	11	4	46	0	2	0	5	2	0	26	35	0	0	1	0	0	0	6	0	1	8	1	2	1	0	0	3	8	0	15	1	1	3	7	0	6	10	5	33	0	0	0
LOC116916776	636	638	521	128	185	333	563	672	309	3985	73	106	496	147	415	48	813	2098	126	342	129	207	65	209	159	15	92	1344	218	883	525	242	220	244	761	16	3109	213	473	216	794	96	320	999	228	3339	204	79	534
LOC116916777	355	223	44	9	701	96	125	242	70	1865	4	6	1042	24	319	23	954	2372	14	37	2	285	15	153	139	5	24	674	18	120	79	96	1243	81	749	3	2389	60	111	740	242	15	561	934	89	2752	25	10	226
LOC116916778	307	154	74	25	29	139	329	463	271	1791	21	11	178	55	281	28	566	1140	18	50	17	55	18	41	93	9	53	354	28	156	74	40	80	206	423	25	1032	31	92	62	293	23	199	450	135	1285	28	19	88
LOC116916779	151	74	30	14	22	126	233	255	190	1095	13	6	102	62	188	28	263	662	35	30	8	23	8	5	69	42	48	268	32	68	24	13	45	263	195	30	670	5	39	51	152	11	111	318	52	739	10	3	31
LOC116916780	79	47	28	2	38	18	42	55	16	325	3	8	49	11	51	5	69	196	1	17	4	22	6	22	8	3	11	94	15	62	26	5	41	28	70	0	247	14	33	33	66	6	23	91	17	283	12	9	43
LOC116916782	226	71	54	10	27	147	320	324	277	1456	22	16	131	76	219	34	379	877	19	38	26	30	7	29	73	23	52	297	22	101	28	25	35	232	329	13	785	23	37	38	193	16	177	370	75	929	34	23	59
LOC116916783	797	205	95	12	14	752	236	1986	59	4156	10	9	11	31	9	5	731	806	26	74	10	25	5	18	154	0	19	331	17	153	242	52	51	201	1024	4	1744	56	66	28	146	13	10	1865	189	2373	60	5	49
LOC116916784	237	123	66	7	8	321	88	718	10	1578	5	7	11	8	3	1	279	314	7	44	2	21	1	12	32	0	1	120	25	112	163	40	33	43	350	1	767	56	60	16	119	9	5	592	76	933	15	3	58
LOC116916785	232	136	30	28	68	154	319	445	232	1644	8	8	315	100	331	30	567	1359	23	49	6	67	30	35	93	34	62	399	27	137	44	65	99	258	358	22	1010	10	37	96	386	30	202	572	197	1530	26	11	95
LOC116916786	310	125	45	32	51	196	461	498	272	1990	27	13	165	147	277	32	342	1003	47	60	31	58	28	37	93	76	86	516	41	165	62	31	80	445	353	66	1243	23	45	51	295	17	196	509	94	1230	39	39	73
LOC116916788	183	117	84	32	25	129	177	175	279	1201	54	24	85	97	98	44	216	618	51	80	72	36	15	40	74	55	49	472	65	138	62	17	33	241	180	17	753	29	105	41	141	25	119	189	88	737	32	23	75
LOC116916789	3	4	3	0	0	23	68	20	9	130	0	0	2	3	2	0	104	111	0	0	0	0	0	0	3	0	0	3	5	0	0	0	3	21	21	0	50	0	0	2	11	0	10	65	0	88	0	2	3
LOC116916790	427	355	95	121	176	330	672	716	969	3861	52	45	461	374	856	148	1306	3242	73	165	55	233	100	129	420	251	629	2055	72	450	150	168	274	811	742	198	2865	50	103	235	562	90	571	760	660	3031	77	51	135
LOC116916791	1044	652	174	89	165	558	1140	1956	887	6665	23	36	1151	135	1421	131	2774	5671	31	158	24	286	88	149	467	21	164	1388	95	509	205	192	454	425	2028	19	3927	71	281	293	982	53	1139	2609	544	5972	81	31	352
LOC116916792	655	420	242	65	126	323	562	575	611	3579	70	85	481	239	421	103	665	2064	86	158	145	134	67	89	248	83	88	1098	95	414	188	99	169	571	737	26	2299	61	231	164	571	46	490	725	198	2486	112	48	251
LOC116916793	8	1	10	0	0	0	12	17	4	52	0	1	3	0	1	1	48	54	2	0	1	0	0	0	1	0	0	4	0	5	1	0	1	5	18	0	30	3	1	1	5	0	5	39	0	54	2	0	4
LOC116916794	889	636	317	59	428	276	496	526	131	3758	127	77	734	220	164	45	315	1682	109	253	50	278	82	261	201	46	28	1308	119	524	347	136	333	394	385	22	2260	179	488	477	741	83	285	663	131	3047	115	116	821
LOC116916795	118	66	41	16	38	42	99	125	81	626	2	1	119	22	132	17	241	534	10	32	9	58	12	42	41	5	26	235	19	85	17	29	72	66	148	15	451	10	42	38	121	20	85	255	52	623	10	8	69
LOC116916796	459	156	91	21	52	327	1143	1136	284	3669	28	17	384	83	422	42	876	1852	33	65	34	47	22	47	112	28	66	454	39	186	73	62	126	445	1297	32	2260	55	110	120	409	8	422	2024	107	3255	30	16	180
LOC116916797	171	156	86	21	50	52	95	90	82	803	7	13	97	36	107	24	115	399	20	47	17	47	17	54	47	15	30	294	17	116	53	30	68	64	128	3	479	21	78	65	171	10	124	200	29	698	25	13	117
LOC116916799	1	1	0	0	0	1	3	0	4	10	0	0	0	0	5	0	1	6	0	0	0	0	0	0	0	0	0	0	0	0	0	0	2	3	0	0	5	0	0	3	0	0	0	1	1	5	0	0	0
LOC116916800	343	166	97	56	74	271	662	671	449	2789	35	41	222	214	382	64	549	1507	50	119	61	92	40	56	138	97	142	795	55	206	101	55	97	594	598	70	1776	38	102	88	383	40	291	676	163	1781	39	31	126
LOC116916801	131	93	47	6	39	44	150	162	154	826	9	7	150	51	192	27	266	702	15	27	17	31	9	16	53	13	42	223	17	86	45	14	40	107	177	13	499	5	51	49	170	7	161	246	45	734	10	4	43
LOC116916802	38	38	17	11	25	35	124	103	212	603	6	9	91	56	131	46	178	517	13	11	19	37	12	21	54	76	79	322	10	58	17	22	21	155	115	31	429	4	18	28	66	12	84	114	71	397	9	8	32
LOC116916803	63	50	3	6	6	37	136	145	173	619	0	1	103	31	229	46	249	659	5	14	5	42	9	15	73	42	74	279	2	62	7	27	34	143	162	36	473	3	11	31	101	10	163	221	81	621	10	15	12
LOC116916804	179	97	90	22	37	62	183	164	84	918	10	16	102	48	115	14	128	433	25	74	34	32	16	27	39	10	16	273	32	112	54	20	37	116	185	6	562	23	49	24	114	10	64	239	25	548	46	15	54
LOC116916805	17	8	3	1	1	13	44	50	40	177	2	1	28	12	40	3	76	162	2	1	1	1	3	4	19	11	10	52	3	8	1	7	12	39	37	15	122	0	2	9	20	1	28	77	15	152	5	0	7
LOC116916806	46	14	7	16	16	41	67	99	115	421	1	2	72	53	108	16	123	375	8	11	4	35	4	15	34	23	31	165	2	47	18	9	20	90	91	12	289	6	10	30	85	4	42	98	63	338	1	0	9
LOC116916808	12	3	5	0	2	4	23	20	19	88	1	4	22	4	20	1	21	73	1	3	3	3	0	3	3	1	6	23	0	9	2	1	9	16	21	3	61	0	4	12	16	0	7	27	3	69	1	0	10
LOC116916811	18	30	15	5	23	14	26	50	32	213	1	0	50	11	56	7	95	220	7	4	2	12	3	10	17	7	14	76	8	23	19	11	24	37	40	3	165	3	16	18	52	4	47	86	26	252	1	6	34
LOC116916812	23	12	4	3	2	15	29	48	56	192	0	0	41	11	70	6	95	223	0	2	1	14	3	2	25	5	7	59	0	19	4	3	10	30	50	4	120	1	3	14	38	1	44	70	15	186	0	1	3
LOC116916813	15	7	1	2	0	8	21	21	23	98	0	0	18	6	24	3	19	70	0	0	3	2	4	3	9	5	5	31	0	11	0	0	0	25	21	4	61	0	0	7	13	0	6	30	4	60	0	2	5
LOC116916814	13	6	1	1	3	4	26	41	30	125	1	0	25	10	41	3	56	136	2	2	1	2	0	4	13	4	4	32	0	12	2	0	3	33	26	4	80	1	3	9	23	1	23	56	16	132	6	3	9
LOC116916815	122	98	21	20	28	147	350	344	290	1420	10	10	164	118	276	32	437	1047	16	17	18	39	24	19	91	85	124	433	7	71	28	34	37	412	297	49	935	7	28	36	225	18	221	347	136	1018	20	10	30
LOC116916816	2	0	2	0	2	2	4	2	3	17	0	1	4	3	6	0	5	19	0	4	0	2	0	1	3	1	0	11	0	3	2	2	1	5	5	0	18	0	2	0	5	0	3	12	3	25	0	1	3
LOC116916817	16	8	2	3	5	8	25	20	34	121	5	0	18	8	23	4	33	91	4	7	0	7	1	8	12	1	7	47	3	9	7	8	3	20	16	2	68	5	19	10	24	5	26	32	11	132	5	2	6
LOC116916820	0	1	0	0	1	0	1	2	1	6	0	2	2	0	1	0	6	11	0	1	0	1	0	0	1	0	1	4	0	0	0	0	2	0	2	0	4	0	0	1	4	0	2	3	3	13	1	1	0
LOC116916824	1	0	0	0	0	15	30	10	6	62	0	0	4	2	4	1	47	58	0	5	0	0	0	0	7	0	0	12	0	1	0	0	0	16	6	0	23	0	0	0	7	0	13	26	0	46	0	0	1
LOC116916825	13	5	1	1	2	2	6	8	2	40	0	0	18	5	5	3	5	36	1	0	0	0	0	2	7	2	4	16	4	3	3	0	4	10	7	1	32	0	7	5	7	0	9	7	8	43	0	2	7
LOC116916826	1	4	4	0	0	0	1	3	0	13	0	0	1	1	2	0	1	5	0	0	0	0	0	0	0	0	0	0	0	2	0	1	2	0	1	0	6	0	1	0	0	0	1	2	1	5	0	0	1
LOC116916827	5	4	0	0	6	2	5	11	10	43	1	2	5	3	10	2	12	35	0	0	1	3	0	5	6	0	1	16	0	6	3	2	3	7	12	0	33	0	6	7	2	1	9	13	8	46	7	5	6
LOC116916829	0	1	0	0	0	0	1	0	0	2	0	0	1	0	1	1	0	3	0	0	0	0	0	0	0	0	0	0	0	0	0	0	1	0	0	0	1	0	1	0	0	0	2	4	0	7	0	0	0
LOC116916836	1	0	0	4	1	1	3	3	10	23	0	0	1	3	6	0	3	13	3	0	0	1	1	0	2	1	0	8	0	2	0	1	0	11	2	0	16	0	0	0	2	0	2	4	1	9	0	0	0
LOC116916837	1	2	0	0	0	1	0	1	0	5	0	0	0	0	3	0	0	3	0	0	0	0	0	3	1	0	0	4	2	1	0	0	0	2	0	0	5	0	0	0	0	0	0	0	0	0	0	2	0
LOC116916839	118	40	24	11	9	51	197	221	152	823	12	12	71	62	105	9	165	436	14	27	3	13	2	13	23	33	34	162	10	43	22	10	23	149	164	14	435	6	18	26	92	7	65	223	30	467	13	5	23
LOC116916841	0	0	0	0	0	3	0	2	0	5	0	0	0	0	0	0	0	0	0	0	0	0	0	2	0	0	0	2	3	2	0	0	0	0	2	0	7	0	1	0	0	0	1	1	0	3	0	0	1
LOC116916844	2	0	0	0	0	0	9	1	9	21	0	0	0	1	1	0	7	9	0	0	0	0	0	0	0	0	0	0	0	0	0	0	0	13	2	0	15	0	0	1	4	0	6	3	4	18	0	0	0
LOC116916846	7	5	6	1	3	4	2	3	0	31	1	2	5	0	3	1	4	16	2	1	1	0	1	1	3	3	5	17	7	2	3	0	4	1	1	1	19	1	0	1	4	1	4	2	3	16	6	0	7
LOC116916858	48	20	5	1	23	45	20	51	4	217	0	2	53	3	18	3	58	137	1	6	0	16	1	12	5	2	4	47	3	13	8	3	36	5	52	0	120	10	10	24	88	5	35	181	6	359	8	4	33
LOC116916859	0	0	0	0	0	0	0	0	0	0	0	0	0	0	0	0	0	0	0	0	0	0	0	0	0	0	0	0	0	0	0	0	0	0	0	0	0	0	0	0	0	0	0	0	0	0	0	0	0
LOC116916860	159	145	90	49	107	117	162	179	181	1189	13	11	351	84	278	65	407	1209	25	59	23	145	35	106	107	48	157	705	26	165	69	74	177	142	367	62	1082	27	110	180	189	33	310	507	205	1561	44	20	154
LOC116916861	49	51	6	0	41	11	19	45	8	230	0	0	105	1	34	6	60	206	0	7	0	39	1	23	4	2	9	85	1	18	5	11	68	4	62	1	170	1	18	54	45	1	43	145	14	321	5	5	51
LOC116916864	42	29	1	18	29	16	32	40	34	241	0	4	83	23	90	19	86	305	2	7	0	42	10	14	48	15	39	177	2	40	18	42	64	54	59	16	295	1	7	54	63	12	76	94	63	370	0	2	14
LOC116916865	17	5	1	1	12	14	63	120	26	259	1	1	129	5	83	2	203	424	1	1	0	20	0	9	27	1	7	66	0	12	1	19	47	27	155	2	263	0	2	46	52	1	69	283	16	469	0	1	1
LOC116916866	90	57	20	5	23	49	127	167	60	598	7	7	88	21	70	12	148	353	7	17	10	25	7	16	21	3	7	113	19	45	15	12	35	54	123	4	307	14	32	22	78	5	43	184	35	413	11	11	36
LOC116916867	3	0	0	0	3	2	1	3	0	12	0	0	0	0	0	0	0	0	1	0	0	1	0	0	0	0	0	2	0	0	0	0	0	0	1	0	1	0	0	5	1	0	0	2	0	8	0	0	1
LOC116916868	88	43	34	9	39	55	178	175	42	663	5	2	81	11	102	6	174	381	4	15	11	33	6	15	24	0	4	112	7	35	21	21	34	50	159	4	331	3	18	29	83	3	71	241	15	463	3	6	22
LOC116916869	152	83	29	13	32	113	235	284	264	1205	10	15	113	56	176	33	309	712	15	43	15	20	2	21	62	34	34	246	31	62	34	16	23	132	267	16	581	12	26	45	146	3	134	361	77	804	25	3	43
LOC116916870	107	59	29	10	11	47	152	100	142	657	6	9	71	31	125	14	195	451	9	37	14	20	18	24	62	17	28	229	20	62	20	27	26	112	153	3	423	15	25	40	89	7	134	165	64	539	25	6	51
LOC116916871	4	0	0	0	0	2	6	2	0	14	0	1	2	0	3	0	3	9	0	0	0	0	0	0	1	0	0	1	0	0	0	0	0	6	3	0	9	0	1	1	3	0	3	3	0	11	0	0	2
LOC116916872	1149	698	238	57	176	1219	1204	1417	832	6990	44	44	723	637	848	173	1379	3848	145	214	60	209	101	77	564	308	352	2030	88	596	218	162	257	1550	1158	120	4149	71	192	202	978	56	781	1756	571	4607	110	72	445
LOC116916873	563	237	71	59	92	623	904	1037	726	4312	50	27	409	234	462	68	1138	2388	70	111	66	112	55	70	205	119	147	955	84	270	124	57	124	935	808	56	2458	67	104	122	655	62	486	1121	291	2908	79	39	165
LOC116916874	0	1	4	1	0	69	17	1	1	94	1	0	2	1	3	0	13	20	1	2	3	0	2	1	1	2	1	13	3	14	7	1	3	9	7	0	44	10	9	2	5	0	12	18	12	68	5	1	0
LOC116916875	34	4	2	0	2	6	10	7	4	69	0	0	14	7	6	0	0	27	1	1	1	5	3	2	3	0	1	17	3	7	1	0	0	5	11	0	27	1	3	0	15	0	2	9	3	33	0	0	6
LOC116916876	159	25	3	4	23	69	122	116	123	644	2	1	124	31	122	14	202	496	4	2	1	55	6	21	36	31	37	193	0	38	4	20	25	110	122	16	335	6	10	31	94	11	140	165	57	514	1	0	16
LOC116916877	16	5	0	0	1	0	2	7	0	31	0	0	10	0	2	0	2	14	1	0	0	0	0	0	1	0	0	2	1	6	0	0	2	1	2	0	12	0	1	0	5	0	1	6	0	13	0	0	1
LOC116916882	65	59	37	9	31	29	23	50	23	326	13	11	40	19	22	8	34	147	22	33	9	12	6	21	16	2	5	126	3	28	38	35	42	46	41	6	239	10	47	28	35	0	27	75	14	236	36	5	42
LOC116916883	144	56	24	22	25	140	265	261	151	1088	8	7	98	55	211	25	231	635	16	19	18	28	14	17	30	42	59	243	6	70	31	18	47	235	221	26	654	16	31	27	152	7	107	386	58	784	12	7	24
LOC116916885	313	124	56	19	30	397	908	764	274	2885	15	13	327	125	527	30	805	1842	23	49	23	49	36	31	151	29	43	434	33	130	43	40	89	434	846	22	1637	20	50	65	364	9	268	1243	95	2114	37	14	70
LOC116916886	6	5	2	2	7	4	1	1	1	29	0	1	7	0	12	1	8	29	0	1	1	6	1	5	2	0	1	17	0	5	2	0	0	4	4	0	15	5	16	1	3	2	6	7	5	45	1	3	2
LOC116916887	3	8	0	1	5	0	4	2	0	23	0	0	6	0	1	1	2	10	0	0	0	2	0	4	2	0	0	8	0	1	0	1	9	0	8	0	19	1	3	5	5	0	6	11	1	32	0	0	8
LOC116916888	10	5	0	1	0	3	4	0	2	25	4	4	1	1	2	0	4	16	0	1	8	1	0	1	1	0	6	18	0	1	0	0	0	1	2	1	5	1	0	0	5	0	5	10	3	24	0	2	1
LOC116916889	110	31	18	3	11	80	489	354	93	1189	3	11	27	16	92	5	227	381	2	21	11	10	1	13	33	1	4	96	11	24	17	8	8	192	291	2	553	6	27	10	73	4	105	674	4	903	19	7	22
LOC116916891	93	108	40	20	14	59	67	77	96	574	6	8	146	84	104	24	77	449	34	12	26	36	6	16	58	26	45	259	10	90	21	13	59	120	85	13	411	0	31	35	88	16	100	106	35	411	3	25	43
LOC116916893	139	96	60	22	36	78	142	109	82	764	8	14	117	63	99	24	122	447	25	39	5	54	10	21	42	26	31	253	15	106	38	36	66	102	154	16	533	10	48	40	109	19	108	180	72	586	39	18	95
LOC116916894	5	0	1	0	5	2	4	3	2	22	2	0	9	0	2	0	11	24	1	0	0	4	0	3	2	0	2	12	1	2	3	5	12	1	5	0	29	2	2	2	3	1	5	9	1	25	0	0	7
LOC116916895	362	182	91	34	67	165	217	303	194	1615	22	12	255	101	212	56	343	1001	48	82	33	87	28	72	92	41	74	557	51	198	93	54	83	233	310	16	1038	36	117	115	310	34	231	415	121	1379	31	36	159
LOC116916896	38	25	1	2	5	14	53	62	83	283	7	1	54	25	94	19	105	305	5	12	2	10	9	6	11	16	44	115	2	23	7	18	27	75	67	10	229	3	5	8	64	8	41	88	51	268	0	6	10
LOC116916897	12	10	0	14	10	3	36	16	30	131	0	6	36	13	45	6	54	160	1	5	1	12	5	7	18	5	23	77	0	8	0	11	22	33	33	10	117	0	4	12	11	8	37	54	21	147	2	1	4
LOC116916898	88	41	26	15	22	69	134	182	228	805	12	8	80	69	133	14	185	501	23	10	8	37	7	17	69	43	45	259	23	75	10	18	30	235	122	23	536	19	18	32	76	6	88	211	78	528	11	6	24
LOC116916899	709	347	81	17	605	195	581	1097	170	3802	9	12	1581	16	640	49	2146	4453	13	72	12	287	22	199	186	3	38	832	35	125	107	117	1101	137	1811	5	3438	51	159	893	407	13	916	2814	177	5430	34	29	321
LOC116916900	206	79	32	18	43	113	338	397	239	1465	10	18	170	61	256	34	455	1004	13	42	19	26	19	29	88	13	53	302	22	117	36	33	32	213	346	10	809	25	30	64	266	7	179	449	79	1099	26	8	64
LOC116916901	106	54	45	12	22	56	171	161	95	722	9	19	76	47	97	8	164	420	21	19	11	9	9	15	35	15	23	157	14	69	27	12	16	137	130	7	412	16	30	11	105	10	86	166	50	474	28	11	30
LOC116916902	0	0	0	0	0	0	0	1	1	2	0	0	3	0	0	0	0	3	0	0	0	0	0	1	0	0	0	1	2	0	0	0	1	0	0	0	3	0	0	0	0	0	0	0	0	0	0	0	1
LOC116916903	70	0	4	0	5	0	3	7	10	99	1	0	5	0	15	0	14	35	3	3	0	3	1	0	1	0	0	11	2	7	11	11	8	4	7	0	50	1	3	15	4	0	9	30	10	72	5	2	5
LOC116916906	192	188	144	28	66	127	108	126	102	1081	43	20	225	69	137	48	157	699	58	108	31	79	22	81	80	41	34	534	80	189	118	45	84	138	184	7	845	47	140	92	201	45	154	178	91	948	47	50	175
LOC116916907	349	120	22	12	34	162	308	337	257	1601	8	11	196	58	177	18	376	844	23	32	14	48	16	17	77	24	44	295	18	97	41	31	60	189	349	15	800	10	41	53	283	8	203	476	64	1138	14	8	86
LOC116916908	4	2	3	0	2	3	1	4	0	19	1	0	1	0	1	1	3	7	0	4	0	1	0	2	1	0	0	8	0	2	0	0	0	2	2	0	6	0	2	2	5	1	1	8	0	19	0	3	1
LOC116916909	330	243	94	31	45	135	267	329	149	1623	15	1	361	90	307	27	370	1171	23	71	4	86	29	63	120	13	63	472	26	230	81	59	106	161	309	10	982	28	108	103	309	15	185	463	152	1363	30	9	205
LOC116916911	10	0	5	0	1	5	18	15	18	72	0	0	8	5	16	7	28	64	5	6	1	4	0	8	8	0	3	35	2	7	2	3	11	12	20	1	58	3	2	0	5	0	6	36	4	56	0	0	0
LOC116916912	182	94	50	5	58	53	166	234	73	915	2	5	135	35	106	15	225	523	6	24	16	41	5	30	44	6	18	190	9	77	34	20	75	93	194	7	509	11	53	45	143	9	80	302	19	662	6	6	103
LOC116916913	240	147	75	31	59	158	290	348	188	1536	8	7	213	76	197	26	533	1060	15	57	18	59	16	40	103	22	50	380	23	125	61	33	73	155	252	4	726	22	80	89	188	9	192	493	111	1184	28	11	127
LOC116916914	91	75	31	17	31	32	86	116	75	554	5	12	128	30	94	6	175	450	17	32	10	64	14	36	28	19	42	262	10	86	26	33	100	68	129	11	463	11	37	39	139	7	96	201	59	589	22	14	57
LOC116916915	9073	2702	870	380	844	4309	6779	8994	5035	38986	132	124	7301	2188	6311	690	12322	29068	369	689	166	1251	388	563	2641	321	1187	7575	260	2751	825	1001	1643	3759	9344	235	19818	221	857	1521	8399	377	6707	13526	2203	33811	307	278	1706
LOC116916916	103	32	21	14	14	62	152	138	115	651	9	4	73	44	154	39	135	458	19	16	18	31	16	36	31	57	66	290	14	45	23	36	57	214	139	40	568	9	30	12	73	12	102	217	95	550	11	7	25
LOC116916918	6	6	1	0	4	2	1	0	1	21	0	0	6	1	0	0	2	9	2	0	0	0	0	0	1	0	0	3	4	5	0	0	3	2	1	0	15	0	2	2	3	1	1	2	0	11	5	2	4
LOC116916919	163	75	45	6	62	73	125	247	37	833	0	1	249	16	115	6	255	642	4	21	3	45	4	32	27	3	11	150	10	57	36	24	71	36	212	2	448	14	35	77	166	0	96	485	22	895	7	7	110
LOC116916920	154	94	34	3	29	70	113	109	68	674	1	4	98	52	115	18	126	414	14	50	12	13	10	33	43	23	39	237	9	111	41	30	42	135	116	23	507	9	37	31	71	4	76	152	58	438	20	7	52
LOC116916921	87	51	29	5	24	41	81	115	45	478	3	3	156	10	68	10	187	437	4	14	2	29	6	24	22	3	14	118	9	38	22	22	43	34	102	8	278	7	20	43	100	2	82	215	22	491	11	9	49
LOC116916922	7	8	0	1	0	13	26	29	13	97	0	0	37	7	32	3	41	120	0	1	0	10	2	2	16	7	7	45	0	5	2	7	7	26	37	6	90	1	4	7	17	2	10	68	5	114	0	1	2
LOC116916923	6	5	2	1	5	0	12	10	4	45	0	0	16	6	12	0	16	50	0	3	0	2	0	5	1	1	2	14	0	3	2	3	3	4	12	3	30	2	0	6	12	0	2	29	6	57	0	0	2
LOC116916924	105	46	26	12	12	56	182	208	183	830	9	5	92	52	185	24	284	651	9	29	3	48	7	16	52	61	51	276	14	69	26	36	30	153	195	20	543	7	31	41	146	27	109	272	110	743	9	13	44
LOC116916925	361	155	67	41	62	143	253	354	202	1638	10	10	346	74	278	17	510	1245	18	59	7	78	22	39	117	28	82	450	30	156	65	37	124	195	346	15	968	18	61	113	333	18	250	590	127	1510	37	27	144
LOC116916927	151	76	32	17	46	53	107	138	51	671	3	4	170	28	149	15	233	602	11	20	4	84	22	35	53	14	44	287	14	90	42	45	104	36	152	1	484	10	40	65	151	15	131	298	96	806	10	9	92
LOC116916928	1736	499	311	20	280	412	689	828	270	5045	13	14	1186	153	404	45	1240	3055	53	127	32	132	60	124	218	15	33	794	58	538	204	91	261	472	1052	15	2691	58	195	282	1074	23	591	1366	129	3718	50	50	577
LOC116916929	28	43	40	3	11	11	13	12	5	166	1	1	11	2	11	3	12	41	6	9	0	17	3	7	2	0	0	44	9	27	34	13	16	4	26	0	129	5	17	23	29	0	15	31	2	122	6	10	47
LOC116916930	72	31	26	4	13	42	121	155	79	543	7	0	55	21	84	2	153	322	11	17	4	7	9	4	22	6	12	92	10	36	14	9	18	56	112	9	264	7	15	18	96	2	56	181	22	397	12	2	28
LOC116916931	2647	942	560	197	399	827	1826	1919	1065	10382	225	119	1502	818	1318	233	1802	6017	239	391	135	364	174	263	674	263	460	2963	177	1048	394	272	522	1640	1776	150	5979	167	461	585	1944	139	1149	2788	704	7937	170	180	875
LOC116916933	212	153	63	23	105	104	228	268	110	1266	14	11	201	59	147	26	372	830	23	50	10	70	19	35	65	4	23	299	24	111	74	38	109	119	264	15	754	35	89	93	214	16	244	446	68	1205	29	17	137
LOC116916934	60	14	11	0	26	27	104	101	55	398	2	2	85	4	133	14	207	447	0	7	2	11	0	10	42	3	0	75	0	13	2	13	24	74	338	3	467	3	7	16	87	2	103	405	7	630	0	0	7
LOC116916935	48	37	12	6	30	54	60	63	37	347	0	1	57	8	66	2	105	239	8	8	2	4	7	13	24	3	13	82	8	36	18	2	28	36	69	0	197	14	20	35	83	5	44	139	30	370	1	4	20
LOC116916936	73	47	19	10	17	31	81	64	65	407	5	0	58	41	67	18	99	288	13	22	4	14	4	16	35	19	12	139	3	47	37	22	34	77	84	20	324	8	26	35	55	7	85	97	23	336	17	4	32
LOC116916937	1604	412	123	43	152	712	2340	3212	698	9296	34	28	1091	222	1589	100	2593	5657	34	88	49	124	60	130	427	39	126	1077	69	385	101	130	276	1085	2642	39	4727	57	158	271	1545	30	1196	3848	228	7333	54	53	216
LOC116916938	0	1	0	0	0	0	1	0	0	2	0	1	1	0	0	0	1	3	0	0	0	0	0	0	0	0	1	1	4	3	0	0	0	1	2	0	10	1	0	1	1	1	1	2	0	7	1	0	0
LOC116916939	7	4	0	0	5	3	25	13	13	70	0	0	10	8	33	4	46	101	2	0	1	6	1	4	5	2	4	25	7	6	1	4	8	17	33	0	76	0	2	1	18	0	42	26	12	101	0	1	6
LOC116916940	12	7	8	1	3	10	23	30	7	101	6	0	8	5	24	3	30	76	1	6	4	4	3	2	14	6	3	43	7	7	1	1	15	22	25	3	81	3	4	8	23	3	19	59	10	129	2	0	3
LOC116916941	409	215	109	24	55	148	317	309	178	1764	23	22	309	91	266	48	385	1144	28	59	18	86	17	61	98	44	58	469	32	242	97	44	161	277	397	15	1265	18	106	125	279	19	260	479	120	1406	25	16	243
LOC116916942	36	40	7	3	18	13	18	26	9	170	2	2	22	7	19	2	18	72	9	9	8	6	0	11	10	1	0	54	3	24	6	6	8	19	32	0	98	1	12	9	35	2	17	28	6	110	10	0	12
LOC116916943	1	0	1	0	0	1	0	0	0	3	1	0	1	0	0	0	0	2	0	1	0	0	0	0	0	0	0	1	0	0	0	0	0	0	0	0	0	0	1	1	3	0	0	0	0	5	0	0	0
LOC116916946	96	50	40	29	37	55	74	54	66	501	4	4	80	51	82	21	59	301	16	21	5	38	16	31	35	34	34	230	13	81	33	26	23	87	74	12	349	8	33	48	98	16	74	101	51	429	15	8	39
LOC116916947	17	22	6	2	6	5	6	4	3	71	5	1	6	3	4	2	6	27	3	17	2	2	1	0	1	6	0	32	6	25	5	1	0	6	12	1	56	4	12	2	13	0	2	11	0	44	2	1	14
LOC116916948	88	89	35	7	19	48	81	132	65	564	8	5	146	14	100	13	196	482	10	30	12	45	15	28	43	5	32	220	22	72	29	38	73	58	138	5	435	7	35	49	135	4	93	249	58	630	10	13	66
LOC116916949	200	138	43	10	59	93	211	375	99	1228	5	5	279	8	200	28	706	1231	2	20	6	55	15	39	79	2	14	232	16	69	51	44	88	71	419	3	761	24	81	82	257	15	225	716	73	1473	8	3	90
LOC116916950	118	51	35	11	34	45	136	158	96	684	10	12	71	34	143	13	245	528	12	30	12	26	6	27	37	8	34	192	15	87	43	13	23	127	195	3	506	32	60	35	116	22	91	203	50	609	13	13	43
LOC116916952	110	56	43	11	40	39	115	122	75	611	8	7	137	30	122	26	189	519	20	16	6	50	19	33	70	12	35	261	4	81	31	36	94	103	164	19	532	10	42	78	111	12	141	231	52	677	2	4	77
LOC116916953	0	1	0	0	0	1	0	2	0	4	0	0	0	0	0	2	0	2	0	0	0	0	0	0	0	0	0	0	0	0	0	0	0	2	2	0	4	0	0	0	1	0	0	0	0	1	0	1	0
LOC116916957	22	17	3	16	12	16	65	70	56	277	4	3	63	21	120	7	123	341	0	7	3	33	4	9	39	13	36	144	1	19	3	13	33	27	86	11	193	4	9	22	28	3	46	121	44	277	0	3	8
LOC116916960	0	0	0	0	0	0	0	0	0	0	0	0	0	0	0	1	1	2	0	0	0	0	0	0	1	0	0	1	0	0	0	0	0	0	0	0	0	0	0	0	0	0	0	1	0	1	0	0	0
LOC116916961	4	3	0	0	1	1	2	1	1	13	1	2	0	0	0	0	4	7	0	0	0	1	0	0	0	0	0	1	0	1	0	0	0	3	0	0	4	1	0	0	0	0	0	0	0	1	0	0	5
LOC116916962	243	183	170	57	75	102	150	164	167	1311	34	25	226	153	173	44	161	816	137	82	38	80	29	70	115	61	78	690	47	253	115	82	119	192	212	40	1060	40	121	102	177	30	206	276	133	1085	59	44	175
LOC116916963	5	1	0	0	0	0	8	4	3	21	2	1	2	0	11	2	2	20	0	0	0	7	0	0	5	1	0	13	0	1	1	0	3	16	13	2	36	5	5	2	7	1	11	12	4	47	0	0	4
LOC116916964	7	4	1	0	7	7	24	20	15	85	0	0	16	1	20	2	32	71	0	3	0	6	1	4	2	1	7	24	7	4	1	1	7	19	18	3	60	1	1	6	13	0	17	45	14	97	1	0	0
LOC116916965	60	27	12	5	9	48	91	74	36	362	1	4	65	16	73	13	107	279	3	6	3	17	2	12	19	2	8	72	3	32	9	7	36	31	131	6	255	2	13	33	72	1	66	146	16	349	5	5	45
LOC116916966	469	382	93	34	120	214	545	957	549	3363	23	23	475	81	663	81	1181	2527	15	82	23	176	50	86	265	20	111	828	63	264	87	88	183	313	879	24	1901	51	112	184	465	36	618	1068	209	2743	37	26	202
LOC116916967	83	19	19	4	9	69	124	93	76	496	9	5	37	22	68	17	110	268	5	7	13	3	7	6	25	10	5	81	13	33	12	6	6	103	97	10	280	9	15	15	55	2	55	134	13	298	7	10	26
LOC116916968	961	561	160	71	804	304	354	700	227	4142	11	26	2077	46	937	143	2547	5787	33	149	34	584	57	320	434	9	106	1726	65	393	266	284	1447	166	1847	11	4479	116	290	1051	658	74	1488	2309	410	6396	77	62	485
LOC116916969	582	180	75	21	80	536	818	724	336	3352	14	17	790	167	820	45	956	2809	31	51	29	91	27	67	202	24	56	578	27	159	59	73	126	514	855	15	1828	40	72	118	538	22	767	1920	116	3593	33	28	187
LOC116916970	381	192	67	23	52	204	389	473	503	2284	31	22	245	136	270	39	565	1308	26	80	33	48	27	29	105	20	52	420	44	140	60	42	62	286	403	14	1051	35	73	58	308	11	204	472	110	1271	44	25	130
LOC116916971	48	9	3	1	2	4	19	14	3	103	0	0	32	7	20	5	26	90	5	3	1	9	4	3	7	0	0	32	1	25	3	6	6	24	30	0	95	0	3	8	19	4	30	54	4	122	4	3	20
LOC116916972	63	40	30	2	12	28	40	107	24	346	3	5	75	13	68	4	142	310	7	11	0	10	6	9	12	2	11	68	8	34	20	21	30	26	87	1	227	4	35	26	107	0	25	160	15	372	6	6	45
LOC116916973	2	0	0	0	4	1	4	4	1	16	1	0	1	1	2	2	5	12	3	2	0	1	0	1	3	0	1	11	0	4	2	0	0	1	9	0	16	0	2	5	3	1	2	4	2	19	0	0	6
LOC116916974	104	52	19	5	16	36	97	180	14	523	5	4	82	6	42	0	102	241	2	7	0	28	2	9	6	2	6	62	6	21	15	8	21	27	92	4	194	13	23	27	64	7	39	222	16	411	3	9	39
LOC116916975	12	9	1	0	10	7	15	35	6	95	0	0	39	0	19	2	71	131	0	1	0	4	0	12	3	0	0	20	0	4	2	2	16	3	52	0	79	2	7	25	11	0	15	75	2	137	0	1	12
LOC116916976	40	15	11	6	3	4	38	40	33	190	1	2	21	14	43	4	48	133	5	6	2	12	6	11	22	2	15	81	2	27	6	10	12	22	25	4	108	5	12	14	40	2	41	42	10	166	0	2	19
LOC116916979	34	19	16	7	45	33	25	21	45	245	15	4	71	25	45	19	46	225	18	12	1	30	12	15	30	30	66	214	3	42	16	29	46	64	41	32	273	7	23	40	55	17	46	42	52	282	19	9	48
LOC116916980	113	84	50	9	41	73	85	92	69	616	5	9	86	52	67	20	181	420	14	29	10	46	12	24	67	13	35	250	21	83	60	20	64	58	123	6	435	18	48	44	113	6	118	150	48	545	20	19	79
LOC116916981	132	90	41	6	40	37	83	118	24	571	3	4	164	11	71	4	190	447	1	25	1	32	6	40	27	2	12	146	7	58	31	17	71	17	139	1	341	23	47	74	107	2	80	307	15	655	5	3	108
LOC116916982	54	37	10	1	25	11	17	32	22	209	4	1	40	4	38	2	34	123	1	8	4	10	3	13	14	4	0	57	4	11	4	9	28	12	30	2	100	2	13	17	22	2	29	58	9	152	9	3	26
LOC116916983	17	10	0	1	7	11	12	15	25	98	0	4	13	3	19	1	28	68	8	7	2	0	0	1	6	7	10	41	1	9	7	5	9	9	23	2	65	3	3	6	9	0	8	37	9	75	11	1	11
LOC116916984	111	50	32	11	30	97	304	346	97	1078	4	9	69	49	167	12	262	572	7	24	6	17	7	19	43	4	16	143	15	53	26	11	50	129	265	15	564	12	28	36	143	10	85	421	24	759	16	9	42
LOC116916985	7	4	2	0	3	4	8	12	10	50	0	0	12	2	8	0	12	34	1	0	2	1	0	0	4	2	6	16	1	7	3	2	7	8	6	0	34	0	1	6	5	1	8	22	2	45	0	1	2
LOC116916986	626	136	59	25	78	288	747	977	370	3306	9	13	333	114	360	46	1138	2013	19	73	12	95	31	43	153	26	75	527	41	138	63	54	136	354	821	16	1623	24	63	66	587	28	343	1061	173	2345	38	36	103
LOC116916987	41	35	30	12	8	51	29	49	59	314	17	7	19	26	37	9	51	166	5	23	13	13	5	10	21	10	3	103	12	31	24	15	23	32	46	8	191	11	45	26	33	7	46	33	30	231	7	10	38
LOC116916988	105	65	47	15	34	72	116	160	87	701	9	9	83	55	129	11	178	474	22	45	12	34	12	24	49	36	20	254	21	99	41	21	54	135	151	18	540	15	40	33	138	18	95	215	56	610	4	17	56
LOC116916989	738	598	205	72	129	314	874	1434	818	5182	22	37	793	139	873	116	1807	3787	45	216	39	338	74	177	321	34	133	1377	102	491	180	178	330	413	1296	21	3011	83	234	233	496	59	743	1538	373	3759	97	49	381
LOC116916990	452	162	54	32	105	201	586	593	340	2525	24	21	320	133	337	51	586	1472	39	86	45	84	33	65	115	61	64	592	58	191	87	62	91	338	515	17	1359	33	90	84	398	27	295	690	104	1721	38	44	126
LOC116916991	520	144	86	20	36	362	956	1004	347	3475	13	14	331	120	618	27	883	2006	10	40	11	28	17	38	206	25	12	387	17	165	68	36	100	644	1020	2	2052	24	59	62	569	15	741	1360	41	2871	23	9	105
LOC116916992	244	112	87	13	31	63	147	168	96	961	22	7	148	74	118	22	115	506	35	46	4	38	10	38	65	43	41	320	11	164	69	38	67	196	220	7	772	10	20	60	286	9	75	303	80	843	12	2	124
LOC116916993	18	19	19	3	16	9	9	10	14	117	0	1	22	1	8	2	21	55	4	16	3	3	2	7	5	0	2	42	3	18	7	7	9	4	18	0	66	3	14	9	14	2	19	45	6	112	2	3	22
LOC116916994	61	45	17	10	17	40	55	65	29	339	5	9	38	21	23	6	99	201	1	10	5	11	2	14	20	4	11	78	5	33	16	4	21	21	68	2	170	5	11	16	55	5	33	113	22	260	3	5	25
LOC116916995	389	168	83	22	60	279	721	935	250	2907	9	18	473	94	537	55	930	2116	34	75	19	89	38	40	200	19	62	576	32	204	135	93	159	298	1232	21	2174	56	76	129	506	13	419	1750	162	3111	48	18	114
LOC116916996	87	41	16	0	2	19	40	54	19	278	3	0	56	8	39	4	44	154	3	3	1	8	5	8	16	5	2	51	1	23	7	9	32	12	47	0	131	1	6	12	42	5	63	101	14	244	5	1	30
LOC116916997	224	154	28	18	29	539	384	498	375	2249	4	14	216	82	174	56	1074	1620	15	39	7	54	14	26	298	34	67	554	9	165	25	30	83	342	482	12	1148	26	29	50	315	14	419	830	317	2000	52	10	96
LOC116916998	4	1	1	1	4	0	1	2	3	17	0	1	2	0	1	0	3	7	1	3	0	0	0	0	0	0	0	4	0	1	1	0	2	3	1	0	8	1	3	1	1	0	1	1	0	8	1	0	2
LOC116916999	69	25	28	7	11	31	85	104	56	416	6	10	51	31	79	14	121	312	6	9	1	24	7	17	42	10	22	138	8	47	25	15	20	83	104	17	319	5	25	25	93	7	49	135	55	394	3	5	23
LOC116917000	3	2	0	1	0	3	11	8	5	33	0	0	1	0	4	2	1	8	0	3	1	0	1	1	2	1	0	9	0	0	3	0	0	3	3	4	13	0	1	2	5	0	2	10	4	24	1	4	1
LOC116917001	6	1	0	1	0	1	4	1	0	14	0	0	0	1	4	0	4	9	0	0	2	1	0	1	0	0	0	4	0	0	2	0	1	2	3	0	8	2	1	0	0	0	6	0	2	11	0	0	1
LOC116917005	315	238	119	25	126	147	278	355	132	1735	21	11	388	68	232	21	458	1199	20	71	14	103	30	102	59	14	57	470	17	189	72	65	180	172	315	38	1048	34	136	187	298	14	161	573	106	1509	50	27	196
LOC116917006	53	51	12	5	17	29	45	31	21	264	3	1	56	23	30	13	38	164	8	14	1	22	4	7	16	19	22	113	3	63	12	14	34	34	58	9	227	4	15	27	26	8	33	98	25	236	10	7	51
LOC116917007	259	255	88	84	127	70	156	182	123	1344	39	44	273	173	168	46	224	967	70	157	15	184	51	131	80	92	169	949	72	443	183	97	129	203	218	51	1396	60	110	128	295	63	139	303	153	1251	98	40	178
LOC116917008	214	173	130	60	74	142	413	495	518	2219	32	36	252	215	440	53	554	1582	57	121	49	113	54	86	132	114	157	883	90	330	107	76	158	456	476	72	1765	47	126	95	341	31	201	523	217	1581	59	24	141
LOC116917009	4	7	1	0	2	2	2	4	2	24	1	0	4	0	8	0	5	18	0	1	4	5	1	0	1	0	3	15	2	8	1	3	0	1	1	1	17	0	3	2	2	2	2	14	2	27	1	0	1
LOC116917010	376	397	137	32	287	188	389	914	187	2907	11	14	826	42	393	46	1613	2945	20	107	5	203	33	163	125	12	84	752	41	226	158	92	394	153	900	8	1972	54	187	364	502	16	384	1717	114	3338	20	27	445
LOC116917011	68	27	21	3	19	20	59	92	30	339	3	0	41	14	42	8	91	199	6	3	1	15	2	11	16	0	11	65	4	18	8	6	26	41	85	1	189	4	15	12	61	2	51	97	16	258	0	2	20
LOC116917012	46	26	1	1	0	117	48	91	33	363	0	2	28	9	13	4	145	201	1	6	0	1	0	0	49	2	0	59	2	13	2	0	18	51	85	0	171	2	2	6	25	2	37	166	12	252	1	0	7
LOC116917013	348	133	30	8	30	338	352	334	207	1780	8	2	205	84	223	33	437	992	15	19	8	30	8	23	145	28	32	308	12	52	18	15	82	393	303	12	887	8	31	38	253	11	370	460	72	1243	8	15	48
LOC116917015	10	1	1	1	0	3	12	15	7	50	0	0	5	1	9	1	17	33	0	1	0	3	0	2	8	0	1	15	0	5	0	1	4	4	5	0	19	1	2	4	16	1	11	19	4	58	2	2	2
LOC116917016	7	41	7	1	2	21	17	21	36	153	2	12	11	1	15	7	17	65	4	13	4	9	2	1	20	9	8	70	2	19	6	5	5	12	17	1	67	10	21	4	5	5	20	24	25	114	5	16	11
LOC116917017	22	4	0	2	1	12	2	13	2	58	1	1	13	3	2	0	7	27	3	0	0	3	0	0	3	1	1	11	3	8	6	1	0	2	6	0	26	0	1	1	5	0	0	12	0	19	1	0	5
LOC116917018	182	69	35	10	23	88	224	400	97	1128	5	8	147	34	176	20	376	766	13	31	13	55	20	35	50	3	24	244	16	93	40	6	65	117	301	4	642	19	48	64	139	10	146	442	54	922	26	7	68
LOC116917019	574	353	116	53	86	423	913	1076	765	4359	31	21	526	222	702	69	1099	2670	67	105	29	99	28	57	277	74	71	807	80	294	98	84	148	697	983	65	2449	43	147	154	593	32	563	1236	266	3034	57	51	184
LOC116917020	92	74	15	2	51	31	25	38	16	344	2	5	123	14	19	10	111	284	2	12	13	35	0	30	33	0	10	135	8	23	15	7	86	13	105	4	261	4	42	77	48	6	48	118	18	361	2	1	69
LOC116917021	267	132	43	18	28	178	442	541	262	1911	16	6	188	57	305	38	624	1234	7	38	10	40	16	27	107	10	43	298	22	77	40	35	71	257	492	6	1000	24	43	48	243	16	303	619	120	1416	23	16	54
LOC116917022	7	5	1	1	6	5	15	10	10	60	0	4	10	8	8	0	9	39	1	0	1	0	1	2	2	4	4	15	6	2	3	8	1	9	5	7	41	0	0	3	8	0	7	11	0	29	0	3	3
LOC116917026	84	84	46	1	40	44	65	79	21	464	6	8	115	14	44	10	120	317	4	13	3	15	4	20	12	2	9	82	6	38	17	13	38	24	97	1	234	18	21	44	95	0	43	184	19	424	4	3	81
LOC116917027	217	108	69	13	29	88	108	148	84	864	6	11	137	32	92	14	153	445	41	49	10	41	18	23	38	13	15	248	17	164	53	23	53	72	142	5	529	25	71	41	110	11	110	156	46	570	23	23	131
LOC116917028	690	420	205	48	134	276	492	988	253	3506	19	25	633	66	541	39	1151	2474	48	148	26	134	45	115	165	10	62	753	47	341	135	84	244	217	738	8	1814	39	195	253	653	22	373	1225	157	2917	63	36	404
LOC116917029	23	8	3	0	6	6	13	9	1	69	0	0	24	0	5	0	15	44	0	0	1	2	0	3	5	0	0	11	0	1	0	2	10	2	27	0	42	0	3	10	12	0	19	38	0	82	0	0	13
LOC116917030	3	1	0	0	2	0	3	5	0	14	0	0	7	0	0	0	6	13	0	0	1	1	0	0	0	0	0	2	0	2	0	0	0	0	7	0	9	0	3	2	6	0	0	5	0	16	0	2	2
LOC116917032	309	216	124	18	81	88	98	128	23	1085	6	16	159	30	55	16	77	359	33	86	16	56	15	44	32	1	11	294	33	217	131	75	86	46	133	10	731	37	116	102	255	16	51	263	34	874	14	15	221
LOC116917033	683	560	853	119	629	212	326	186	275	3843	155	155	663	120	229	91	278	1691	141	380	175	297	104	391	89	44	32	1653	379	668	484	174	413	186	741	5	3050	261	664	600	697	117	329	528	177	3373	246	163	942
LOC116917034	227	223	89	15	89	114	110	209	67	1143	11	26	258	24	127	12	260	718	25	69	21	76	14	62	66	12	14	359	29	172	86	50	138	69	185	3	732	16	126	129	191	18	156	347	35	1018	36	24	222
LOC116917035	259	157	63	10	31	153	288	422	81	1464	6	10	259	43	164	9	374	865	5	32	9	53	16	31	81	7	17	251	31	119	67	43	80	96	305	6	747	21	55	90	281	13	117	697	33	1307	20	8	117
LOC116917036	2	1	0	0	0	2	3	3	3	14	0	0	4	0	3	0	3	10	0	0	0	0	0	0	3	2	0	5	1	0	0	0	8	8	3	0	20	1	3	0	2	0	4	3	0	13	0	0	0
LOC116917037	67	37	48	12	47	38	121	111	53	534	3	12	92	23	75	18	147	370	6	24	5	34	8	29	56	15	14	191	17	75	40	34	46	74	115	3	404	16	29	64	91	9	95	170	55	529	18	15	71
LOC116917038	80	20	12	5	13	21	105	110	47	413	5	4	55	25	74	7	164	334	5	4	4	16	5	12	36	7	14	103	5	33	8	14	10	49	116	4	239	9	18	13	77	5	51	197	37	407	9	0	28
LOC116917040	554	307	169	44	85	277	648	786	374	3244	25	10	365	144	454	54	748	1800	45	133	38	86	28	95	178	26	53	682	48	304	109	66	158	350	677	17	1729	28	140	125	503	22	385	953	121	2277	19	33	230
LOC116917041	21	18	6	0	5	13	5	15	4	87	1	1	4	5	0	3	9	23	0	4	6	2	1	1	2	0	0	16	4	19	22	5	8	7	11	0	76	5	14	5	9	0	1	22	5	61	7	2	18
LOC116917042	229	150	100	24	61	134	266	339	171	1474	23	16	239	92	176	34	353	933	34	88	16	67	20	57	91	20	27	420	44	182	91	58	94	193	314	20	996	23	91	101	254	17	166	373	81	1106	20	16	151
LOC116917043	9	3	0	1	3	0	2	2	0	20	0	0	1	0	2	0	3	6	0	0	0	0	0	0	2	0	2	4	0	6	3	1	0	1	3	0	14	0	3	4	8	0	1	4	0	20	0	0	9
LOC116917044	2	4	2	0	0	0	2	1	1	12	1	0	3	0	2	3	0	9	0	3	0	0	0	2	0	0	0	5	0	2	1	1	1	0	1	0	6	2	0	1	10	0	1	23	0	37	2	0	2
LOC116917046	35	18	7	5	11	8	23	19	25	151	0	0	27	28	35	5	33	128	1	3	6	10	2	5	20	2	8	57	2	27	11	4	8	23	20	2	97	0	5	11	29	1	34	37	10	127	6	4	12
LOC116917047	3	10	1	0	1	4	4	3	6	32	0	2	9	2	7	0	11	31	0	7	3	3	0	2	6	0	0	21	3	3	4	1	5	3	4	0	23	0	7	3	6	1	6	9	3	35	0	1	2
LOC116917049	84	26	23	13	31	64	111	130	53	535	1	0	75	25	87	7	123	318	9	30	11	18	6	6	30	12	16	138	10	42	9	22	38	85	132	9	347	3	30	42	71	11	83	224	45	509	14	4	32
LOC116917050	281	174	127	33	64	119	251	178	132	1359	22	21	164	51	120	25	250	653	43	94	46	66	24	54	51	7	9	394	76	241	111	48	75	166	265	1	983	44	120	58	228	23	229	231	55	988	59	44	193
LOC116917051	0	0	0	0	0	0	3	4	0	7	0	0	5	0	2	0	3	10	0	0	0	0	0	1	0	0	1	2	0	0	1	0	0	0	3	0	4	2	0	0	4	0	2	23	0	31	0	0	0
LOC116917052	272	299	129	59	92	258	349	475	293	2226	14	23	446	142	457	68	658	1808	38	116	31	142	37	77	185	57	114	797	29	346	129	112	191	219	545	32	1603	27	121	159	481	35	335	738	222	2118	43	31	300
LOC116917054	18	4	9	2	3	13	74	70	82	275	0	4	26	7	73	5	89	204	6	4	0	1	1	3	29	12	9	65	1	6	9	2	9	71	104	5	207	0	12	5	19	0	66	107	12	221	12	2	7
LOC116917055	77	28	18	29	58	42	137	132	99	620	5	5	135	67	179	52	215	658	31	12	10	40	25	36	84	74	120	432	4	85	29	44	70	149	145	39	565	4	26	52	123	11	121	267	121	725	7	11	30
LOC116917056	206	113	84	44	75	80	176	186	160	1124	45	25	154	122	241	56	325	968	52	78	36	139	26	59	98	69	152	709	49	209	67	71	101	200	246	53	996	21	110	121	181	43	161	293	200	1130	34	15	126
LOC116917057	1914	760	397	53	300	824	1123	787	221	6379	86	103	730	180	337	88	440	1964	136	384	78	405	100	209	197	47	8	1564	167	927	317	145	210	420	1260	23	3469	168	422	274	1449	133	293	1790	116	4645	236	145	666
LOC116917058	131	112	87	27	85	33	31	26	22	554	8	18	106	22	23	7	32	216	23	79	27	37	13	68	12	0	3	262	16	116	74	36	84	24	70	2	422	38	86	86	104	24	23	82	13	456	35	22	120
LOC116917059	436	214	146	45	89	333	765	1061	538	3627	22	18	528	166	653	58	1248	2693	57	126	45	131	37	72	197	62	144	871	60	304	117	72	145	491	856	86	2131	48	120	130	646	24	389	1193	264	2814	47	57	172
LOC116917061	129	85	45	19	20	66	141	149	172	826	6	10	147	49	122	31	179	544	27	41	10	45	13	34	71	49	36	326	16	93	41	19	43	163	170	14	559	12	48	37	130	16	183	239	81	746	15	19	72
LOC116917062	54	114	6	2	5	215	100	121	78	695	0	7	44	12	21	25	156	265	8	39	6	5	2	3	125	10	11	209	3	50	3	3	5	108	160	14	346	0	17	13	34	3	68	226	67	428	1	7	21
LOC116917063	239	150	45	23	101	112	267	420	135	1492	2	12	444	56	302	41	568	1425	19	35	12	159	36	76	112	26	102	577	12	125	34	78	230	144	382	13	1018	16	40	194	213	23	246	767	142	1641	9	19	93
LOC116917064	10	10	1	1	6	8	5	5	5	51	0	1	7	4	3	2	4	21	1	1	2	1	1	1	2	0	0	9	0	5	4	5	4	5	3	2	28	1	2	1	5	3	2	3	4	21	3	2	2
LOC116917065	24	19	7	3	17	1	9	15	9	104	4	2	43	1	11	2	34	97	2	8	5	14	2	11	9	1	9	61	5	13	15	8	8	9	26	2	86	6	7	9	27	0	26	32	14	121	1	5	19
LOC116917066	21	5	4	0	1	10	32	47	20	140	1	1	24	19	45	5	57	152	0	0	1	4	1	2	16	4	10	38	0	11	2	7	7	19	50	1	97	0	6	8	26	0	12	73	3	128	0	0	9
LOC116917067	122	25	24	5	14	27	65	113	47	442	4	1	72	8	64	2	140	291	2	10	2	1	2	6	26	4	2	55	3	19	2	12	17	22	123	1	199	3	22	10	96	2	43	166	11	353	0	2	25
LOC116917068	13	13	5	0	2	0	6	3	0	42	0	1	1	3	1	0	3	9	0	2	0	2	0	0	0	0	0	4	0	8	4	0	0	2	6	0	20	0	3	6	8	0	2	1	0	20	0	0	8
LOC116917070	162	114	45	16	20	70	121	118	91	757	13	9	133	46	98	15	135	449	19	32	13	27	11	25	45	19	24	215	15	119	46	29	55	110	127	8	509	14	39	35	147	9	112	168	53	577	15	9	70
LOC116917071	0	2	0	0	0	2	0	0	0	4	1	0	0	0	0	0	0	1	0	0	0	0	0	0	0	0	0	0	0	0	0	0	0	0	0	0	0	0	0	0	0	0	0	0	0	0	0	0	0
LOC116917072	179	134	1	23	96	109	253	454	214	1463	0	2	798	78	580	53	1339	2850	13	6	2	208	32	51	182	20	199	713	2	172	32	115	252	192	564	30	1359	2	13	313	375	14	419	1138	301	2575	0	10	22
LOC116917074	22	7	5	3	0	23	8	12	5	85	0	1	4	6	4	0	14	29	0	1	0	1	0	0	0	0	0	2	0	6	3	1	1	3	7	0	21	0	3	0	14	0	2	20	3	42	0	0	1
LOC116917075	25	11	1	3	9	6	32	41	23	151	0	1	65	12	54	8	73	213	2	2	0	10	4	6	17	3	18	62	3	8	1	12	16	27	45	7	119	2	3	12	43	3	43	104	18	228	0	0	2
LOC116917076	23	6	18	2	9	9	35	15	17	134	1	8	18	4	16	1	13	61	6	9	3	1	3	2	11	6	3	44	2	17	2	1	6	16	18	4	66	2	4	3	15	0	26	27	4	81	9	2	14
LOC116917077	126	61	26	9	46	31	103	110	89	601	3	2	93	40	82	11	188	419	8	21	17	34	5	22	34	12	29	182	12	54	34	21	37	62	177	18	415	13	43	36	119	9	110	223	47	600	28	6	39
LOC116917078	7	1	0	0	0	1	0	5	1	15	0	1	1	0	3	2	1	8	0	2	1	3	0	0	1	2	2	11	0	1	2	3	0	3	3	2	14	0	0	1	5	0	0	2	1	9	0	4	1
LOC116917080	10	3	1	2	2	3	9	7	3	40	0	4	2	6	8	1	11	32	0	0	6	1	1	0	3	6	2	19	1	0	3	1	5	7	7	1	25	0	0	4	5	0	7	5	3	24	2	0	2
LOC116917082	49	25	20	2	13	21	36	46	17	229	0	3	47	10	27	4	48	139	4	14	5	16	3	4	13	9	23	91	7	30	10	11	47	37	45	10	197	10	25	22	67	3	22	87	18	254	0	7	26
LOC116917083	73	49	14	2	27	29	87	95	53	429	3	3	62	10	79	18	162	337	7	10	6	13	6	13	26	14	7	102	9	41	14	9	26	42	112	3	256	7	23	27	126	6	79	163	38	469	4	5	41
LOC116917084	348	220	167	44	87	141	289	310	260	1866	34	24	261	161	329	59	490	1358	78	106	27	92	36	90	107	54	89	679	71	319	125	82	134	228	358	32	1349	37	137	134	342	31	312	436	135	1564	65	75	232
LOC116917085	0	0	0	0	0	1	0	0	0	1	0	0	0	0	0	0	0	0	0	0	0	0	0	0	0	0	0	0	0	0	0	0	0	1	0	0	1	2	0	0	0	1	0	0	0	3	0	0	0
LOC116917086	37	29	37	7	34	4	14	19	18	199	3	4	38	1	27	6	42	121	1	21	15	19	2	16	13	0	3	90	13	44	15	11	44	7	31	0	165	5	44	23	37	6	36	48	9	208	13	4	40
LOC116917089	977	399	135	63	89	462	686	1278	678	4767	12	13	803	202	773	64	1471	3338	35	86	22	179	65	75	266	46	164	938	27	384	126	138	286	395	770	33	2159	32	120	217	824	33	588	1305	487	3606	29	17	256
LOC116917092	17	252	227	23	31	10	0	5	0	565	38	38	72	17	1	0	1	167	61	131	41	25	7	18	1	0	2	286	14	244	364	94	46	1	15	1	779	57	267	66	155	21	1	0	21	588	12	20	217
LOC116917093	124	90	35	10	42	52	104	125	53	635	7	7	143	36	106	28	173	500	31	46	5	30	12	38	43	10	32	247	15	128	49	23	64	67	156	4	506	9	49	48	168	5	116	226	26	647	16	9	74
LOC116917094	299	217	105	21	87	138	195	346	121	1529	19	18	402	59	227	34	478	1237	24	85	20	76	26	73	134	14	46	498	40	186	89	63	145	138	410	6	1077	53	125	162	297	31	297	609	100	1674	9	20	218
LOC116917095	47	8	9	0	4	41	64	88	21	282	0	3	38	9	54	2	79	185	1	6	4	3	1	4	10	4	10	43	3	15	4	11	13	22	61	1	130	3	9	11	36	1	36	94	23	213	1	1	7
LOC116917096	18	4	0	3	6	16	53	49	14	163	3	0	15	5	35	2	39	99	1	0	1	4	2	2	6	0	5	21	6	5	0	4	12	20	54	0	101	5	3	9	26	0	10	61	16	130	0	0	4
LOC116917097	26	8	0	0	0	21	13	15	0	83	0	1	11	1	9	0	12	34	1	4	1	0	1	0	1	0	0	8	0	15	1	0	1	2	20	0	39	0	2	6	12	0	12	29	0	61	0	0	9
LOC116917098	3615	921	296	123	380	1348	2038	2761	1719	13201	33	39	2883	576	2351	295	4856	11033	84	211	48	420	160	181	1062	62	345	2573	76	949	275	363	738	1087	3201	38	6727	86	281	471	2726	119	2416	5176	885	12160	73	86	671
LOC116917099	134	132	65	5	62	24	30	64	40	556	8	4	130	28	63	4	86	323	18	35	10	46	5	23	38	8	1	184	15	105	59	27	74	23	87	0	390	15	79	51	125	13	76	120	18	497	17	10	143
LOC116917100	198	175	123	31	65	60	120	219	95	1086	9	13	216	35	160	28	229	690	9	60	14	56	12	57	52	9	14	283	42	165	70	46	121	76	237	3	760	27	109	72	184	13	160	277	49	891	31	22	154
LOC116917101	222	145	71	36	49	130	225	243	211	1332	28	11	205	134	173	51	272	874	42	50	20	60	27	36	98	101	74	508	40	184	84	39	90	329	236	44	1046	24	45	57	214	23	266	280	100	1009	34	42	136
LOC116917102	132	38	37	12	15	75	191	207	73	780	13	7	76	27	117	15	214	469	19	28	23	24	10	13	35	6	10	168	12	52	20	13	43	81	173	6	400	15	24	23	101	7	75	229	20	494	17	8	25
LOC116917103	89	31	15	0	28	58	208	366	59	854	1	4	175	10	185	4	433	812	1	8	1	29	3	11	32	0	2	87	3	18	5	5	59	36	330	2	458	1	13	35	139	10	113	640	27	978	5	5	18
LOC116917104	28	7	0	4	2	20	13	17	18	109	0	1	24	10	28	9	16	88	1	7	0	4	1	3	18	1	6	41	3	9	8	2	7	14	21	3	67	0	5	6	11	3	18	35	4	82	0	1	10
LOC116917105	59	28	13	3	7	21	29	74	14	248	0	0	49	6	46	1	71	173	0	11	0	14	2	10	9	0	2	48	10	31	3	4	21	5	65	0	139	11	26	11	47	1	30	75	14	215	3	2	24
LOC116917106	105	41	34	7	23	78	134	246	78	746	4	4	121	14	145	4	390	682	2	28	2	35	17	16	55	0	11	166	13	57	28	23	46	41	208	1	417	6	37	32	131	3	111	267	47	634	3	10	35
LOC116917107	22	30	9	5	1	35	25	38	17	182	0	2	60	44	39	10	12	167	4	2	8	1	4	4	14	12	4	53	4	9	3	4	24	39	16	4	103	3	7	8	46	5	25	42	3	139	8	12	15
LOC116917108	45	32	11	3	9	39	137	123	36	435	7	0	30	18	48	4	66	173	3	5	3	6	2	6	2	6	13	46	0	15	4	7	4	79	57	12	178	5	12	9	45	0	28	119	22	240	1	9	11
LOC116917109	2	0	0	1	0	0	0	0	0	3	0	0	2	2	0	0	1	5	0	0	0	0	0	0	0	0	0	0	0	2	0	0	3	0	1	0	6	1	0	0	0	2	0	2	0	5	6	0	2
LOC116917111	665	1618	2296	504	1070	90	137	114	68	6562	220	348	2633	350	163	147	109	3970	255	1142	464	1937	165	2258	11	13	37	6282	621	1851	3121	2025	1488	302	1589	2	10999	927	3386	1939	1861	315	326	284	630	9668	373	303	3094
LOC116917113	2855	3898	3459	875	817	256	581	178	135	13054	1068	1319	3373	1381	260	170	56	7627	1323	2762	2008	1792	430	2143	23	93	46	10620	1551	6192	5674	2421	1166	926	2915	12	20857	1906	4779	1340	3867	781	232	658	752	14315	1593	997	3769
LOC116917114	75	28	7	10	18	43	111	142	87	521	1	4	111	31	112	10	239	508	6	11	1	60	8	37	33	12	44	212	12	45	22	41	112	72	159	6	469	5	23	57	104	4	98	285	51	627	0	17	45
LOC116917115	54	23	1	7	6	4	8	9	6	118	0	2	15	0	8	1	5	31	4	0	5	11	2	3	1	4	3	33	0	3	3	1	2	5	8	0	22	0	13	11	14	1	4	28	7	78	1	3	20
LOC116917116	921	323	110	45	130	403	530	1025	409	3896	7	29	733	151	578	44	1153	2695	39	79	20	174	34	122	215	16	95	794	45	332	129	106	247	299	854	20	2032	37	109	215	797	42	525	1253	223	3201	52	41	236
LOC116917118	1	1	0	1	93	0	2	4	0	102	0	0	42	1	2	0	24	69	0	0	0	65	0	29	4	0	2	100	0	2	1	17	176	2	7	2	207	1	2	124	0	2	23	27	5	184	0	0	6
LOC116917120	72	76	58	16	48	34	38	24	35	401	11	13	91	25	51	10	70	271	9	21	14	64	12	58	18	9	13	218	17	75	49	36	53	21	58	5	314	28	62	54	86	11	46	79	45	411	21	1	88
LOC116917121	5	9	1	6	1	3	10	10	12	57	0	0	9	2	15	0	19	45	0	6	0	4	0	1	4	1	5	21	1	8	4	0	5	5	20	0	43	0	1	1	12	1	15	29	6	65	4	0	6
LOC116917122	612	300	175	61	73	299	472	489	288	2769	46	45	432	226	368	91	345	1553	76	124	50	114	50	81	199	75	99	868	48	384	173	121	141	476	549	50	1942	46	155	116	497	54	377	521	168	1934	71	59	249
LOC116917123	884	405	170	47	208	294	557	954	266	3785	35	17	805	141	414	67	737	2216	38	101	36	218	38	120	102	32	65	750	92	229	120	81	228	364	850	27	1991	49	131	232	613	45	409	1561	123	3163	45	91	408
LOC116917124	254	86	78	28	42	180	673	564	392	2297	29	11	166	78	357	50	466	1157	19	41	41	31	12	36	123	29	49	381	23	88	33	18	58	360	606	23	1209	36	45	60	294	9	319	791	66	1620	24	16	67
LOC116917125	10	0	1	0	0	1	2	5	0	19	0	0	8	0	3	0	4	15	2	0	0	0	0	1	0	0	0	3	0	11	1	0	3	6	2	0	23	0	1	1	4	0	1	8	0	15	0	0	2
LOC116917126	35	9	6	1	0	32	61	92	27	263	2	4	21	3	27	0	40	97	2	2	4	9	0	1	12	5	2	37	0	18	3	2	3	63	47	2	138	1	4	2	30	6	18	76	8	145	2	3	4
LOC116917127	147	36	28	11	28	95	215	228	166	954	4	18	99	68	151	32	245	617	25	43	15	46	12	18	35	37	53	284	11	89	29	37	39	190	190	15	600	16	18	37	133	5	115	287	58	669	6	18	37
LOC116917129	15	8	0	0	8	11	19	14	2	77	0	0	5	5	9	0	3	22	3	3	3	0	2	0	3	0	4	18	0	11	3	1	3	21	15	0	54	1	4	5	18	0	12	15	0	55	0	0	6
LOC116917130	364	215	45	28	82	200	323	381	208	1846	10	6	430	86	329	54	543	1458	22	31	20	133	24	89	176	15	73	583	16	183	57	103	191	201	466	18	1235	16	61	163	343	41	403	575	142	1744	25	31	132
LOC116917131	259	117	131	31	53	103	339	254	451	1738	56	22	246	135	359	112	350	1280	52	92	29	66	32	52	110	88	119	640	67	206	68	46	95	442	377	69	1370	42	128	71	241	37	363	375	133	1390	49	49	162
LOC116917132	443	232	124	36	99	244	453	688	203	2522	21	32	340	117	400	49	778	1737	32	101	35	89	31	86	146	13	93	626	76	270	108	58	141	239	650	17	1559	57	96	143	541	35	348	882	143	2245	65	29	187
LOC116917133	539	402	180	56	171	386	1042	1313	351	4440	23	33	786	96	727	100	1531	3296	38	175	38	175	49	144	224	13	103	959	65	354	172	145	262	417	1852	34	3301	94	206	225	805	43	651	2366	249	4639	78	38	327
LOC116917134	104	39	9	4	13	11	71	103	10	364	0	4	81	8	20	3	31	147	0	5	1	13	2	5	14	1	0	41	1	12	4	8	28	22	49	0	124	4	7	10	51	4	19	80	2	177	0	13	20
LOC116917135	10	9	1	3	4	8	28	30	25	118	0	1	17	10	46	4	39	117	0	1	0	6	4	3	9	5	17	45	0	7	1	4	4	21	36	7	80	2	0	11	14	3	22	59	11	122	2	3	4
LOC116917136	261	190	133	32	107	104	149	223	94	1293	18	24	272	42	172	28	245	801	23	71	24	81	27	71	72	23	25	417	39	183	71	55	128	108	231	8	823	31	107	110	293	13	171	478	68	1271	43	24	174
LOC116917137	307	193	106	13	66	131	344	556	193	1909	7	10	302	58	256	27	492	1152	17	37	14	83	20	64	99	15	35	384	24	150	66	54	121	188	398	28	1029	35	109	122	243	16	215	687	78	1505	40	25	151
LOC116917138	12	0	0	0	5	3	18	20	7	65	0	0	23	5	12	0	43	83	2	0	0	8	2	6	5	7	16	46	1	4	0	5	13	11	21	3	58	0	0	7	22	0	14	29	18	90	0	0	2
LOC116917140	210	167	72	13	53	91	221	290	139	1256	14	14	167	70	125	36	231	657	25	53	41	61	10	26	65	29	28	338	28	95	44	29	67	157	234	12	666	12	99	44	189	19	207	303	51	924	56	28	123
LOC116917141	52	44	27	3	43	8	12	8	8	205	1	5	28	3	3	1	4	45	0	11	6	25	4	25	1	0	0	72	3	41	19	10	35	3	21	0	132	8	36	31	32	1	11	19	6	144	2	11	68
LOC116917142	36	12	4	7	1	17	28	15	20	140	2	2	8	8	26	6	15	67	3	13	4	0	0	4	5	1	5	35	8	8	7	12	5	31	26	0	97	2	5	0	32	2	27	40	5	113	7	4	10
LOC116917143	3	1	0	0	0	0	7	3	1	15	1	0	2	2	5	1	4	15	0	1	0	0	0	0	0	1	1	3	0	1	1	0	0	1	6	0	9	1	1	1	2	0	3	3	0	11	1	0	1
LOC116917144	98	58	18	20	22	36	138	183	122	695	12	2	123	28	143	15	227	550	9	27	2	35	5	15	47	14	42	196	7	82	17	40	66	103	192	6	513	12	27	40	114	7	103	228	94	625	19	5	34
LOC116917145	1028	698	348	98	214	399	697	663	458	4603	58	52	599	263	443	103	746	2264	126	276	76	213	75	175	210	80	80	1311	151	749	318	133	219	596	869	32	3067	79	356	221	903	74	475	840	206	3154	207	128	523
LOC116917149	634	455	48	63	77	579	1028	1296	1605	5785	23	9	1961	391	897	234	3316	6831	26	8	82	226	51	87	252	67	303	1102	52	5	85	161	368	1125	1085	68	2949	18	38	246	800	125	2057	2408	498	6190	61	255	177
LOC116917153	487	401	131	19	172	180	350	854	161	2755	9	17	616	26	417	35	1333	2453	19	68	14	131	30	114	128	6	25	535	47	204	119	86	276	89	903	5	1729	65	188	215	500	16	439	1346	142	2911	36	19	299
LOC116917154	7	4	2	2	2	3	3	3	5	31	0	1	4	0	5	1	5	16	0	0	0	0	0	3	3	1	2	9	0	4	0	0	0	1	1	0	6	0	1	7	1	0	0	5	2	16	0	1	3
LOC116917155	534	443	348	38	137	129	227	303	107	2266	50	34	463	37	330	67	382	1363	26	155	33	157	64	156	113	13	29	746	86	359	242	111	166	96	512	6	1578	77	295	214	346	31	293	488	99	1843	118	46	492
LOC116917156	2	4	0	0	2	0	4	4	0	16	0	0	2	0	1	4	1	8	0	2	1	4	0	4	1	0	0	12	0	5	1	2	2	0	2	0	12	1	4	1	1	0	3	2	0	12	1	1	2
LOC116917157	175	119	44	8	50	97	228	297	65	1083	9	5	249	44	168	20	290	785	5	26	11	98	18	60	44	6	32	300	11	97	55	49	121	127	276	4	740	23	63	86	206	3	130	429	45	985	21	4	115
LOC116917158	299	209	149	30	58	189	286	351	222	1793	31	30	256	139	220	38	362	1076	59	129	33	84	28	52	123	76	74	658	54	304	147	63	100	271	303	22	1264	41	128	124	366	20	235	446	102	1462	46	39	193
LOC116917159	169	110	111	59	70	95	134	154	142	1044	23	10	178	105	202	53	183	754	54	70	16	134	27	70	75	60	114	620	34	187	95	79	108	197	209	53	962	23	96	77	175	34	219	241	141	1006	17	13	131
LOC116917160	467	315	206	49	154	215	744	885	320	3355	32	38	390	133	393	81	733	1800	81	169	50	143	45	117	218	61	93	977	78	341	184	104	188	482	1092	54	2523	63	156	183	583	38	421	1178	176	2798	88	25	266
LOC116917161	129	16	4	0	30	14	32	46	36	307	2	2	122	8	20	1	71	226	5	1	0	7	2	11	5	2	3	36	2	5	2	1	52	30	51	3	146	0	5	18	32	2	51	116	3	227	1	1	43
LOC116917162	201	27	4	1	24	31	32	34	29	383	0	1	175	16	55	5	67	319	6	5	1	17	10	15	28	0	6	88	2	11	5	5	95	25	84	5	232	4	7	58	54	9	90	111	6	339	0	2	9
LOC116917163	7	12	12	4	3	6	3	7	3	57	0	1	21	1	2	4	20	49	1	4	6	4	2	1	1	2	1	22	1	5	2	0	9	0	9	0	26	0	7	9	18	2	3	38	0	77	2	7	11
LOC116917164	19	13	5	0	16	5	20	16	6	100	1	4	35	3	12	3	48	106	3	1	0	6	2	9	4	0	3	28	1	7	2	6	18	10	34	0	78	2	8	17	10	1	17	61	3	119	6	3	21
LOC116917165	52	39	10	1	17	19	59	133	20	350	0	0	70	2	57	6	171	306	1	10	4	11	2	3	21	0	1	53	3	13	8	6	27	9	142	0	208	2	11	19	42	0	37	165	14	290	4	0	32
LOC116917166	501	245	296	38	191	177	262	373	151	2234	71	37	531	194	179	52	183	1247	103	153	40	117	60	105	90	47	26	741	153	286	129	106	177	293	186	19	1349	89	297	184	414	70	156	351	71	1632	102	107	325
LOC116917167	115	92	24	19	8	134	256	196	176	1020	0	2	608	164	123	17	336	1250	33	10	3	30	4	9	65	6	16	176	5	8	15	29	78	677	203	2	1017	2	4	27	141	8	251	208	39	680	3	30	37
LOC116917168	949	674	121	26	557	175	603	1397	241	4743	8	9	2474	41	1034	52	4057	7675	13	46	15	335	28	244	364	12	66	1123	23	265	102	163	1062	229	2847	4	4695	58	178	1005	944	15	1865	5037	225	9327	51	21	510
LOC116917169	28	14	2	1	0	14	9	16	9	93	1	2	12	10	10	0	13	48	8	3	3	4	1	3	0	1	3	26	1	13	5	1	3	7	10	1	41	4	0	7	23	1	11	20	3	69	0	3	15
LOC116917170	103	83	38	8	44	58	112	165	67	678	1	8	139	24	82	16	189	459	5	19	7	38	10	30	35	16	14	174	14	74	37	15	51	40	132	2	365	7	64	70	99	18	120	251	22	651	12	8	92
LOC116917171	298	205	133	29	89	135	263	343	225	1720	21	20	327	77	320	45	645	1455	34	91	17	98	32	94	125	19	68	578	39	228	92	91	199	142	437	19	1247	41	162	204	248	12	358	500	165	1690	32	17	264
LOC116917173	2	9	1	2	4	2	7	47	11	85	0	2	7	1	7	0	14	31	0	2	0	10	0	7	10	2	1	32	6	60	9	11	5	5	4	0	100	0	9	13	24	2	3	48	3	102	0	2	9
LOC116917174	4	10	0	1	0	3	6	3	6	33	0	0	11	1	6	4	12	34	0	0	0	4	1	4	2	0	11	22	0	8	1	4	16	2	6	3	40	0	0	9	1	2	12	14	4	42	1	0	2
LOC116917175	381	184	106	14	98	230	617	908	197	2735	7	14	417	29	577	44	1060	2148	21	71	21	122	28	68	171	8	31	541	43	186	100	72	161	245	1206	4	2017	23	99	94	599	21	549	1583	170	3138	37	17	166
LOC116917177	168	109	39	18	38	76	154	148	117	867	8	11	114	60	125	13	174	505	28	45	13	23	15	25	40	15	31	235	18	105	53	20	35	117	108	15	471	4	39	65	154	8	93	186	46	595	22	8	58
LOC116917179	277	133	56	58	100	189	391	534	265	2003	17	10	383	90	494	117	701	1812	41	48	17	179	37	86	159	70	195	832	30	158	63	118	197	347	582	97	1592	43	90	140	308	38	383	863	276	2141	21	22	127
LOC116917180	0	2	0	0	0	0	4	7	2	15	0	0	2	0	1	0	11	14	0	0	0	0	0	0	0	0	0	0	0	1	0	0	2	1	8	0	12	0	0	0	2	0	0	9	2	13	0	0	0
LOC116917181	64	34	6	0	2	17	48	28	28	227	6	3	30	7	24	10	37	117	12	8	6	8	2	3	19	5	5	68	5	37	18	10	14	24	42	2	152	2	13	9	23	6	21	51	19	144	5	7	19
LOC116917182	5	2	0	0	2	0	5	6	4	24	1	0	7	0	3	0	4	15	0	0	0	4	0	2	1	0	1	8	1	5	1	0	2	1	4	0	14	1	0	0	13	0	3	5	1	23	2	2	3
LOC116917183	34	16	7	1	1	8	25	24	13	129	1	0	30	10	30	1	56	128	3	6	5	13	2	3	6	4	9	51	2	6	10	5	9	33	22	2	89	0	11	9	17	7	29	37	7	117	0	4	29
LOC116917184	12	5	6	0	1	8	19	15	11	77	2	3	11	7	19	7	17	66	0	4	1	7	3	3	6	2	5	31	5	4	3	6	0	21	25	2	66	1	4	5	10	0	4	28	5	57	7	1	6
LOC116917185	38	11	3	0	0	21	5	5	2	85	0	0	6	0	0	1	8	15	8	3	0	0	0	1	3	0	2	17	2	17	1	0	2	3	5	1	31	0	2	0	18	2	4	9	1	36	0	2	4
LOC116917186	44	7	4	0	0	13	16	13	16	113	0	0	10	12	7	0	18	47	8	8	1	7	3	4	2	0	1	34	0	21	4	0	10	21	12	1	69	1	4	4	15	0	11	18	2	55	1	1	4
LOC116917187	17	8	2	5	8	15	38	41	32	166	1	3	30	20	50	11	70	185	3	1	0	12	0	2	13	9	12	52	2	17	1	4	15	39	55	2	135	0	1	10	21	2	24	56	27	141	5	3	3
LOC116917188	42	35	27	4	57	20	21	36	18	260	2	6	75	12	48	9	71	223	3	8	4	34	5	24	22	3	16	119	8	45	25	14	69	24	55	7	247	11	28	46	61	5	56	71	24	302	0	8	34
LOC116917189	0	0	0	0	0	0	0	0	0	0	0	0	0	0	0	0	0	0	0	0	1	0	0	0	0	1	0	2	0	0	0	0	0	0	0	0	0	0	1	0	0	0	0	0	0	1	0	1	0
LOC116917191	31	6	10	1	6	4	35	61	6	160	4	0	10	1	25	0	45	85	3	1	2	6	0	1	0	2	4	19	0	6	2	1	2	24	41	0	76	1	9	2	15	5	9	84	6	131	0	2	9
LOC116917194	5	1	0	0	0	3	4	0	0	13	0	0	2	1	2	0	1	6	0	0	0	0	1	0	1	0	0	2	0	5	0	1	6	4	0	1	17	0	8	0	3	0	0	1	2	14	0	1	3
LOC116917195	11	4	0	0	0	4	6	0	8	33	0	1	6	1	2	2	6	18	1	0	0	0	0	0	0	0	0	1	0	0	1	0	1	2	2	0	6	0	1	9	5	1	0	2	0	18	3	0	1
LOC116917197	92	66	13	7	16	55	175	253	98	775	4	3	112	37	169	26	271	622	7	17	7	51	16	26	37	15	34	210	5	46	24	31	52	110	204	3	475	9	21	54	114	12	116	296	64	686	7	4	32
LOC116917198	147	79	31	20	25	84	210	160	329	1085	27	5	113	79	197	51	278	750	25	24	23	52	13	25	73	45	93	373	32	80	39	27	67	225	172	42	684	7	52	35	104	36	133	280	81	728	7	15	38
LOC116917200	0	0	4	0	0	1	2	1	0	8	3	0	5	3	7	1	0	19	4	0	0	0	0	0	3	1	1	9	0	0	2	0	8	0	2	0	12	0	0	0	0	0	4	6	1	11	0	0	0
LOC116917201	309	190	83	30	56	126	151	135	149	1229	16	10	195	88	159	58	205	731	43	81	27	70	22	66	99	38	41	487	27	208	105	40	160	131	235	15	921	18	120	87	203	36	161	172	74	871	12	30	161
LOC116917202	132	41	29	1	19	62	162	216	47	709	8	3	93	15	96	16	242	473	1	19	8	19	6	13	31	0	9	106	11	48	14	14	52	54	207	12	412	13	21	21	134	1	99	340	14	643	5	4	38
LOC116917203	171	67	42	14	12	131	255	284	140	1116	7	4	114	24	145	7	299	600	9	23	23	22	7	22	60	4	14	184	16	59	33	20	34	118	251	6	537	10	35	37	142	10	140	293	63	730	11	14	35
LOC116917205	8	4	2	0	2	10	3	1	0	30	0	0	0	0	1	0	0	1	0	0	0	1	0	0	1	0	0	2	0	2	0	0	0	2	1	0	5	0	0	0	6	0	0	0	1	7	0	0	3
LOC116917206	601	341	186	41	382	417	426	394	423	3211	56	23	832	166	336	81	896	2390	35	100	27	200	44	170	178	42	38	834	78	207	67	86	350	356	671	4	1819	48	225	461	531	45	655	1134	215	3314	60	71	398
LOC116917207	0	2	1	0	0	0	0	2	1	6	0	0	3	0	4	0	4	11	0	1	2	0	0	1	1	0	0	5	0	0	0	1	1	0	5	0	7	0	2	1	3	0	1	3	0	10	0	1	2
LOC116917209	184	119	40	19	22	227	226	257	179	1273	3	8	174	72	126	33	227	643	11	28	4	45	11	20	78	45	50	292	9	76	25	30	47	218	195	28	628	11	23	39	147	10	124	317	108	779	17	15	47
LOC116917210	99	49	22	8	12	55	154	202	73	674	1	1	154	13	42	3	190	404	14	4	2	3	2	2	11	3	3	44	3	15	13	6	18	96	100	4	255	5	13	8	159	1	63	154	4	407	1	9	32
LOC116917211	1	3	3	3	0	4	16	20	11	61	0	0	9	0	29	16	25	79	0	1	0	2	0	2	9	0	9	23	0	2	0	1	4	6	17	1	31	1	2	4	7	0	20	33	4	71	0	0	2
LOC116917214	103	73	40	5	38	31	71	122	37	520	17	4	93	14	78	15	122	343	6	26	15	29	2	19	14	10	9	130	30	43	16	17	37	65	112	2	322	12	60	40	97	5	98	214	26	552	8	12	88
LOC116917216	25	50	25	2	14	41	29	43	21	250	3	3	38	4	29	6	71	154	2	14	1	7	4	8	38	1	7	82	7	24	17	6	16	15	36	3	124	11	19	18	29	5	33	109	25	249	11	10	13
LOC116917217	125	68	45	4	15	38	89	97	36	517	4	4	51	15	69	5	88	236	10	22	1	49	4	22	27	8	21	164	7	47	32	8	48	37	117	5	301	9	27	43	135	15	95	190	34	548	15	4	48
LOC116917218	1470	537	263	54	158	608	943	1868	312	6213	28	42	1150	132	761	51	1758	3922	50	174	48	239	52	149	256	14	84	1066	74	583	212	145	399	316	1111	9	2849	109	277	332	1196	59	563	2078	220	4834	62	55	460
LOC116917219	92	84	69	15	22	62	85	70	120	619	18	9	87	59	115	29	98	415	41	57	16	31	17	26	67	49	64	368	19	107	29	29	55	103	106	38	486	14	58	37	89	17	109	144	81	549	25	20	76
LOC116917220	539	316	236	63	135	193	372	273	233	2360	54	41	353	145	349	94	309	1345	78	165	51	100	41	100	154	58	38	785	93	449	173	102	161	294	534	16	1822	33	236	170	376	42	338	440	178	1813	74	68	394
LOC116917222	154	138	83	23	31	87	112	135	156	919	25	8	133	63	191	39	194	653	33	71	19	63	18	65	72	28	50	419	43	134	68	55	93	92	182	13	680	29	103	53	123	23	188	209	93	821	24	27	103
LOC116917223	0	0	1	0	0	0	0	0	0	1	0	1	0	0	0	0	0	1	0	2	0	1	0	0	0	0	3	6	0	0	0	0	0	0	0	0	0	1	0	0	1	0	2	2	0	6	0	0	0
LOC116917224	83	49	34	3	34	50	78	162	33	526	3	5	119	15	52	4	144	342	19	27	23	17	5	11	19	8	15	144	12	34	15	5	54	26	96	2	244	14	24	49	105	9	38	245	24	508	12	6	45
LOC116917225	51	39	20	11	19	34	40	35	62	311	4	6	58	38	54	31	66	257	8	15	17	37	5	12	35	20	25	174	9	33	29	7	31	43	50	18	220	7	24	12	50	19	77	52	33	274	5	5	25
LOC116917226	246	179	71	39	68	133	165	250	109	1260	17	16	227	90	149	41	196	736	41	62	22	67	22	62	41	41	45	403	27	151	67	51	86	160	283	28	853	32	116	100	276	18	141	344	66	1093	30	21	164
LOC116917227	295	224	143	58	60	166	355	403	376	2080	28	21	230	102	297	73	557	1308	60	114	57	135	52	85	126	39	112	780	57	232	97	81	112	203	409	61	1252	83	154	80	236	61	288	623	188	1713	70	54	181
LOC116917228	15	21	18	0	0	16	6	8	0	84	2	3	5	6	1	0	9	26	4	8	5	1	2	2	1	0	0	23	3	20	6	3	4	7	15	0	58	0	14	3	8	0	3	6	0	34	2	1	30
LOC116917229	124	110	117	21	43	50	173	277	136	1051	9	11	162	65	253	15	397	912	28	76	25	45	18	43	101	16	93	445	33	72	218	172	163	151	269	11	1089	43	130	83	260	22	115	466	188	1307	73	26	50
LOC116917230	115	70	17	6	32	25	69	94	20	448	0	3	137	5	99	16	89	349	1	9	4	24	6	14	31	2	3	94	7	45	19	15	38	12	115	0	251	2	25	45	87	2	124	180	14	479	5	2	71
LOC116917231	224	172	149	31	72	79	132	146	147	1152	13	17	164	51	152	27	286	710	17	106	21	48	36	61	71	9	25	394	28	212	140	56	81	100	182	3	802	19	120	75	251	31	216	178	89	979	41	24	212
LOC116917232	67	65	13	30	124	47	113	172	57	688	2	4	335	35	203	37	261	877	7	22	10	173	14	111	98	7	71	513	8	79	38	107	250	66	240	60	848	7	42	230	147	26	171	543	86	1252	1	16	38
LOC116917233	368	304	143	62	116	176	339	493	331	2332	27	33	312	134	367	58	693	1624	56	135	55	160	55	105	174	72	163	975	65	353	120	122	149	303	483	48	1643	48	125	201	355	32	326	661	205	1953	79	45	235
LOC116917234	29	26	9	1	11	6	16	12	5	115	2	0	13	9	12	2	14	52	1	8	1	2	0	2	3	0	1	18	5	12	3	3	18	5	16	1	63	0	5	6	15	3	11	28	0	68	2	2	15
LOC116917235	114	82	34	14	22	37	90	111	25	529	9	10	129	19	78	8	111	364	10	31	15	21	9	45	19	8	23	181	14	93	42	25	52	24	100	5	355	21	49	46	111	3	58	225	19	532	11	7	78
LOC116917236	111	85	38	0	26	70	154	217	34	735	1	8	195	9	90	11	276	590	7	13	11	29	10	15	24	2	3	114	7	52	17	15	48	56	155	5	355	9	29	59	112	4	71	337	14	635	3	9	57
LOC116917237	16	22	10	3	10	10	5	9	10	95	1	6	43	1	6	3	26	86	8	7	0	9	4	7	6	4	9	54	4	12	11	10	19	17	19	1	93	1	5	22	15	1	6	30	13	93	2	0	12
LOC116917238	81	57	33	7	29	44	47	70	25	393	4	5	92	5	52	5	93	256	5	17	7	28	2	12	16	1	4	92	20	75	17	15	37	27	76	1	268	11	38	41	80	4	58	106	13	351	3	14	60
LOC116917239	5	0	0	0	0	0	0	1	0	6	0	0	0	2	0	0	1	3	0	1	1	0	0	0	1	0	0	3	0	0	0	0	0	0	1	0	1	0	1	0	1	0	0	0	0	2	0	0	1
LOC116917240	37	39	42	4	15	16	16	23	23	215	11	7	20	17	3	14	20	92	27	19	4	8	6	14	10	9	3	100	10	66	40	9	29	34	20	4	212	19	30	19	21	6	25	17	13	150	11	15	46
LOC116917241	573	272	99	25	93	137	397	476	165	2237	14	8	684	158	334	75	338	1611	38	44	21	132	34	99	140	51	106	665	25	220	63	75	282	248	408	46	1367	15	82	162	298	36	304	801	125	1823	15	42	244
LOC116917242	90	25	30	3	4	76	131	122	113	594	13	5	61	57	123	28	196	483	14	33	12	13	14	17	43	34	25	205	9	69	24	26	40	179	140	15	502	11	20	26	132	8	84	171	75	527	17	14	30
LOC116917243	276	112	52	12	35	125	351	433	219	1615	9	8	191	91	223	29	388	939	28	41	18	25	23	27	83	32	41	318	22	124	63	34	84	192	355	21	895	11	67	52	238	16	195	500	91	1170	37	16	107
LOC116917244	192	133	39	10	23	53	76	122	30	678	4	2	264	36	120	13	50	489	6	25	4	41	9	42	35	0	11	173	5	33	46	17	87	37	102	5	332	11	51	42	92	8	103	188	5	500	18	23	126
LOC116917245	198	94	105	26	53	130	210	273	84	1173	6	13	143	22	123	31	312	650	7	46	17	36	13	35	40	4	17	215	22	117	41	27	33	93	248	5	586	28	48	77	191	7	94	413	48	906	10	16	89
LOC116917246	158	96	60	23	33	73	149	126	123	841	9	13	169	48	190	37	220	686	19	51	15	79	32	30	77	30	84	417	40	146	69	45	76	134	234	20	764	18	68	65	153	49	186	276	123	938	35	27	85
LOC116917247	72	57	36	6	28	43	129	130	75	576	4	2	90	26	100	12	158	392	6	41	5	30	10	21	45	11	15	184	20	72	25	24	44	93	137	2	417	9	30	36	112	9	68	220	34	518	13	4	48
LOC116917248	369	186	104	32	63	237	463	608	230	2292	19	4	368	135	354	32	604	1516	32	46	32	70	36	52	151	49	91	559	24	260	61	80	120	417	547	45	1554	38	83	125	407	24	266	837	144	1924	31	20	160
LOC116917249	53	37	15	1	5	25	12	24	15	187	7	21	22	8	14	4	19	95	8	21	6	9	3	4	6	5	6	68	11	59	23	2	8	33	31	3	170	13	16	8	49	4	18	25	16	149	16	19	32
LOC116917251	1413	587	272	59	212	873	1119	2189	835	7559	9	7	1988	405	1127	110	2640	6286	54	81	22	240	69	116	489	59	133	1263	24	558	178	230	520	693	1679	35	3917	37	149	412	1557	54	1245	3212	370	7036	32	31	463
LOC116917252	41	96	14	0	5	182	115	147	109	709	0	0	4	37	18	14	109	182	7	28	2	6	5	1	120	19	3	191	7	51	2	0	1	201	116	2	380	2	3	5	42	2	105	158	58	375	4	1	8
LOC116917253	17	12	5	3	4	10	20	15	13	99	1	2	18	6	16	2	38	83	4	9	0	14	0	4	11	4	4	50	0	11	0	6	11	19	36	3	86	3	5	3	16	2	19	59	12	119	0	2	7
LOC116917254	4	10	10	1	8	1	4	14	4	56	3	1	6	2	9	2	7	30	1	9	2	3	1	6	4	2	0	28	5	12	6	3	3	7	7	0	43	1	3	6	4	1	4	7	0	26	0	0	6
LOC116917255	5358	4173	1935	629	1620	3049	8178	12648	5254	42844	444	402	7519	1293	8347	786	19542	38333	632	1442	464	1793	531	1443	2615	406	737	10063	828	4148	2270	1543	2778	4256	16957	203	32983	910	2086	2550	8986	434	7796	19968	2496	45226	949	406	3308
LOC116917257	105	43	22	3	14	73	141	219	34	654	7	3	90	4	82	6	192	384	2	15	1	21	1	25	21	0	6	92	5	37	22	7	44	36	216	4	371	12	24	21	73	5	68	346	11	560	4	3	31
LOC116917258	2	0	0	0	0	0	2	1	1	6	0	0	1	0	0	2	1	4	0	5	0	0	0	0	0	0	2	7	0	0	0	0	0	0	3	0	3	0	0	0	0	0	0	7	0	7	0	0	0
LOC116917259	2400	784	292	77	277	1547	6987	6079	1702	20145	40	37	1782	466	3430	201	5531	11487	94	192	41	265	102	260	1095	124	205	2378	82	704	280	207	608	2482	10950	69	15382	139	257	492	3253	75	2317	11205	630	18368	90	40	589
LOC116917260	20	28	17	1	14	8	9	11	5	113	0	1	39	6	15	0	20	81	1	9	0	5	5	8	7	0	4	39	10	22	11	4	23	6	22	5	103	9	15	21	34	4	24	30	8	145	2	3	24
LOC116917261	93	86	39	6	73	20	59	84	33	493	5	10	89	17	63	15	115	314	7	32	6	31	11	52	26	1	8	174	12	73	27	27	54	27	98	0	318	14	58	72	107	12	70	141	14	488	23	6	96
LOC116917262	536	285	166	31	183	341	709	1144	278	3673	20	18	652	63	611	38	1797	3199	18	97	16	152	29	110	158	10	62	652	45	216	113	80	218	272	1076	10	2030	55	99	220	706	16	422	1974	187	3679	44	17	292
LOC116917263	0	1	4	0	0	0	0	5	0	10	0	0	6	1	5	0	8	20	0	0	0	0	1	2	0	0	0	3	0	0	0	1	0	1	4	0	6	0	1	1	4	0	6	12	0	24	0	0	0
LOC116917265	159	173	106	11	62	83	109	171	91	965	16	3	163	33	116	19	232	582	11	70	14	62	9	68	67	6	13	320	30	134	63	40	68	74	190	1	600	36	82	51	200	15	125	245	46	800	40	15	172
LOC116917266	47	44	17	3	10	41	46	54	52	314	3	2	23	20	43	12	71	174	4	12	6	14	4	4	21	11	16	92	0	35	17	10	17	43	59	5	186	6	12	12	56	4	34	81	33	238	4	4	36
LOC116917267	75	210	4	7	0	909	476	626	196	2503	2	7	8	33	5	30	1037	1122	24	15	0	1	9	1	346	13	11	420	9	147	4	1	11	766	516	16	1470	4	10	19	90	0	337	906	213	1579	5	0	41
LOC116917268	307	132	105	45	68	174	238	273	251	1593	20	21	247	121	338	91	502	1340	37	77	36	70	52	71	146	49	199	737	31	261	92	59	125	248	377	30	1223	39	88	106	272	35	311	370	233	1454	57	40	157
LOC116917269	169	129	85	6	56	28	45	92	47	657	11	5	163	18	79	19	167	462	10	53	8	65	7	52	42	14	24	275	19	78	64	40	65	24	122	8	420	20	67	70	127	14	102	157	46	603	20	18	183
LOC116917270	89	98	37	0	51	50	92	136	61	614	3	4	125	23	70	15	152	392	7	15	6	57	4	34	33	3	4	163	5	45	25	24	77	60	127	3	366	16	40	52	86	4	60	269	16	543	14	2	102
LOC116917271	61	95	125	12	58	32	52	83	56	574	10	23	84	8	89	18	159	391	20	41	13	51	12	33	35	7	20	232	32	94	102	58	51	47	110	2	496	44	103	58	92	5	55	157	39	553	22	1	101
LOC116917272	250	149	99	40	57	117	260	298	177	1447	24	34	214	88	208	37	334	939	38	55	15	55	26	64	87	46	31	417	21	150	102	42	98	219	334	18	984	22	76	97	306	29	196	463	87	1276	39	29	115
LOC116917273	36	13	4	0	7	43	244	220	43	610	0	1	66	9	159	22	132	389	0	0	0	5	1	5	31	3	1	46	3	5	1	2	15	89	424	8	547	2	2	13	80	1	218	598	12	926	2	2	3
LOC116917275	526	293	210	44	127	172	370	378	355	2475	29	20	337	115	380	56	471	1408	50	154	19	79	32	72	153	63	49	671	55	292	131	90	139	286	503	11	1507	36	155	131	400	30	404	733	100	1989	42	31	314
LOC116917276	11	4	2	0	2	9	7	18	2	55	0	1	12	3	1	2	13	32	2	0	1	4	2	0	0	0	2	11	8	6	4	1	1	9	6	0	35	2	3	6	10	0	6	15	2	44	9	0	6
LOC116917277	674	325	139	71	90	353	651	805	499	3607	35	48	497	225	597	82	1073	2557	61	115	33	141	60	88	226	79	151	954	57	418	138	105	206	578	743	48	2293	47	144	170	635	41	443	1014	274	2768	111	45	200
LOC116917278	7	0	0	0	0	3	3	4	4	21	0	0	5	4	8	0	6	23	3	0	0	4	1	1	3	0	2	14	0	1	2	2	1	2	8	0	16	0	0	1	5	2	3	10	2	23	0	0	0
LOC116917279	25	10	15	6	17	12	20	10	19	134	3	2	13	8	19	8	36	89	2	16	3	13	12	15	13	5	10	89	10	28	8	9	16	25	25	4	125	4	14	13	30	9	17	12	34	133	5	5	10
LOC116917280	310	155	73	12	21	57	154	132	63	977	16	11	212	66	77	28	153	563	14	47	17	51	6	54	55	12	20	276	28	82	51	15	23	82	101	8	390	18	71	27	100	11	161	199	33	620	43	29	114
LOC116917282	4500	2101	988	432	1448	3955	4685	13806	8550	40465	455	335	4101	1024	5492	452	17180	29039	458	1346	273	1218	730	1040	1750	366	1004	8185	523	2919	917	553	2209	2797	5208	95	15221	652	1281	1328	11450	375	2715	9174	2850	29825	779	350	1997
LOC116917283	740	353	173	17	181	208	1157	1175	263	4267	20	28	638	54	520	63	1334	2657	27	106	16	151	29	97	164	9	50	649	75	237	140	85	238	242	1702	11	2730	61	216	205	640	15	690	1698	148	3673	43	35	381
LOC116917284	817	679	123	285	402	688	1341	1651	1311	7297	26	36	1749	656	2585	507	2343	7902	158	181	53	837	276	431	1059	443	1057	4495	79	1033	343	653	1072	1651	1981	270	7082	48	272	849	1444	252	1718	3310	1599	9492	40	106	257
LOC116917285	6	1	0	0	0	3	1	2	2	15	0	3	3	0	2	0	3	11	0	0	0	0	0	0	0	0	1	1	0	1	0	0	2	0	6	0	9	1	0	2	6	0	2	12	0	23	0	0	1
LOC116917286	519	149	65	11	59	184	516	763	160	2426	18	11	275	45	269	27	698	1343	14	38	18	38	15	18	74	14	17	246	21	101	37	19	63	197	515	14	967	16	55	61	368	18	199	763	90	1570	22	14	120
LOC116917287	104	62	1	3	3	75	76	63	26	413	3	5	50	39	28	1	45	171	8	0	4	11	18	2	5	0	0	48	0	44	16	13	13	48	69	0	203	0	9	10	167	1	15	63	0	265	0	3	23
LOC116917288	280	121	73	55	61	203	399	416	196	1804	27	23	207	126	228	42	349	1002	31	54	34	56	27	49	110	57	108	526	33	168	60	46	64	318	309	45	1043	26	67	48	285	23	154	449	91	1143	36	19	100
LOC116917289	38	12	3	2	4	23	82	113	52	329	0	0	46	20	70	5	91	232	1	5	2	5	1	1	14	2	9	40	6	7	4	7	14	54	80	3	175	7	5	19	32	2	21	140	28	254	5	2	5
LOC116917290	198	109	64	14	52	114	210	271	84	1116	7	11	185	55	189	13	287	747	6	32	21	42	13	31	63	8	11	227	20	85	48	31	55	120	219	6	584	22	62	70	194	8	152	349	62	919	9	8	82
LOC116917291	23	22	13	2	7	9	21	18	3	118	0	1	18	4	11	0	20	54	1	9	2	5	1	3	3	1	1	26	4	32	34	10	6	4	30	0	120	8	14	9	37	0	12	24	9	113	0	6	48
LOC116917292	844	464	193	40	125	323	672	765	411	3837	31	34	603	185	586	98	771	2308	75	105	59	119	42	104	205	93	80	882	69	320	153	102	199	422	910	60	2235	48	255	175	599	43	667	1199	167	3153	72	44	415
LOC116917293	212	123	96	12	83	71	146	169	139	1051	12	12	161	45	175	33	212	650	30	42	16	35	15	39	70	20	30	297	34	155	92	54	83	130	232	6	786	32	75	85	186	11	143	222	72	826	45	17	145
LOC116917295	1	0	0	0	0	2	2	4	1	10	0	0	0	0	1	0	2	3	0	0	0	0	0	0	0	0	0	0	0	0	0	0	0	0	3	0	3	0	0	3	0	0	0	1	0	4	0	0	0
LOC116917296	77	52	19	3	24	21	31	62	22	311	1	1	52	5	56	5	142	262	2	8	1	13	5	10	12	0	2	53	0	36	22	15	29	11	84	0	197	4	22	18	52	7	75	96	10	284	4	3	43
LOC116917298	207	170	43	32	83	187	292	519	207	1740	10	9	246	76	328	33	487	1189	43	55	4	64	32	46	136	72	94	546	26	159	93	61	113	292	605	34	1383	22	70	126	345	19	312	822	168	1884	43	29	130
LOC116917299	59	47	13	16	31	50	105	173	78	572	2	5	144	32	125	9	202	519	13	17	4	50	14	19	41	11	34	203	2	36	10	31	72	76	167	15	409	3	12	43	104	0	55	268	53	538	8	4	24
LOC116917300	260	91	85	7	46	167	563	575	148	1942	8	10	251	38	296	41	430	1074	18	36	16	37	10	38	108	7	19	289	18	167	64	29	56	182	673	5	1194	30	59	51	234	2	284	880	36	1576	32	9	86
LOC116917301	60	13	10	2	4	35	70	89	20	303	7	1	33	11	23	4	54	133	1	14	6	11	0	5	8	3	7	55	10	20	10	3	9	22	58	2	134	10	5	13	53	3	24	121	4	233	8	5	18
LOC116917302	89	57	27	9	36	63	68	104	73	526	2	3	119	18	82	11	185	420	10	14	1	28	8	19	39	12	18	149	6	69	30	25	37	87	129	3	386	11	26	40	71	2	97	190	26	463	7	10	43
LOC116917303	289	154	34	26	92	190	419	557	286	2047	12	6	287	102	334	37	683	1461	20	33	13	89	26	46	109	41	70	447	36	103	36	41	94	364	432	28	1134	20	45	99	358	16	257	692	135	1622	28	16	93
LOC116917304	41	22	14	0	0	38	69	142	32	358	0	1	25	11	30	1	83	151	0	2	0	1	6	2	10	0	6	27	1	22	5	5	8	56	80	1	178	0	5	13	76	4	27	107	11	243	1	3	13
LOC116917305	14	5	0	2	8	5	9	22	13	78	0	1	6	8	17	4	44	80	4	0	0	5	3	2	3	4	4	25	3	5	1	2	5	9	22	3	50	0	0	14	11	1	8	27	16	77	2	1	3
LOC116917307	411	139	55	15	45	278	596	845	283	2667	13	16	291	95	379	41	795	1630	15	52	22	55	17	44	95	18	48	366	45	124	26	48	91	363	651	12	1360	27	35	86	388	11	294	857	111	1809	12	10	92
LOC116917308	96	34	12	12	22	66	231	204	141	818	4	5	75	42	126	13	196	461	7	23	4	31	4	7	57	7	28	168	4	45	15	11	23	154	189	6	447	3	10	24	102	8	75	250	47	519	6	0	28
LOC116917309	11	7	6	1	0	2	23	33	16	99	1	0	21	8	31	5	16	82	1	3	2	0	0	4	2	1	4	17	0	5	4	1	1	17	33	4	65	0	3	1	14	0	7	47	8	80	0	2	0
LOC116917310	185	60	20	5	23	90	99	100	35	617	9	9	56	31	25	11	46	187	6	16	13	8	10	9	13	3	10	88	26	53	30	5	22	68	88	9	301	11	24	7	147	4	43	107	6	349	10	14	31
LOC116917311	248	129	48	27	51	80	199	257	111	1150	7	6	202	47	171	15	261	709	24	52	8	44	15	34	67	17	29	290	27	141	39	36	73	157	256	13	742	13	42	62	207	3	146	326	86	885	27	24	84
LOC116917313	599	159	67	27	40	283	553	778	383	2889	15	18	364	169	395	55	801	1817	23	44	26	60	28	49	126	49	77	482	28	154	45	34	97	560	581	37	1536	25	43	74	545	20	361	846	117	2031	43	16	118
LOC116917314	76	39	27	5	18	25	59	41	24	314	5	4	64	16	51	19	58	217	11	15	1	27	6	23	26	2	24	135	3	42	18	10	41	27	80	7	228	7	24	26	46	6	69	59	27	264	5	2	50
LOC116917315	196	75	33	20	20	82	214	277	126	1043	17	9	161	36	120	20	360	723	10	19	8	25	10	32	50	6	37	197	14	128	23	26	65	96	193	11	556	12	34	53	144	9	132	262	86	732	7	8	47
LOC116917317	1	0	0	0	0	0	2	1	0	4	0	0	1	0	0	0	0	1	0	0	0	0	0	0	0	0	0	0	0	0	0	0	0	0	0	0	0	0	1	0	0	0	0	0	0	1	0	1	0
LOC116917318	1416	1921	314	68	1497	189	489	1282	320	7496	12	20	5107	18	1561	186	4705	11609	21	201	8	1228	55	777	717	3	102	3112	75	619	422	616	2493	160	3451	11	7847	160	662	2171	1224	35	3426	5107	524	13309	75	50	1507
LOC116917319	210	148	52	40	57	131	255	311	341	1545	17	15	217	106	295	75	373	1098	30	41	16	93	33	57	136	99	147	652	18	185	63	42	78	251	234	52	923	34	50	73	194	29	212	349	190	1131	15	20	75
LOC116917321	2	10	0	9	50	4	8	6	5	94	0	0	70	1	31	6	47	155	2	2	0	94	6	26	7	0	7	144	0	10	11	44	90	4	33	3	195	2	11	74	7	3	61	125	34	317	0	7	8
LOC116917322	360	110	32	24	52	124	289	352	321	1664	17	9	252	89	235	40	518	1160	25	41	15	61	21	22	101	36	60	382	19	109	39	32	83	345	297	24	948	18	38	48	299	28	197	477	80	1185	17	10	89
LOC116917323	9	1	1	0	5	0	4	9	1	30	0	0	23	1	6	0	18	48	0	6	0	4	0	3	3	0	0	16	0	0	4	0	19	2	9	0	34	0	1	7	1	0	3	26	2	40	0	0	2
LOC116917324	66	68	15	19	15	55	115	162	162	677	0	3	83	65	170	27	162	510	18	29	13	22	10	20	65	63	39	279	16	69	12	35	35	201	145	25	538	6	22	35	110	9	109	195	67	553	20	9	22
LOC116917325	800	363	33	5	4	1456	284	2074	99	5118	5	10	13	57	5	19	703	812	21	53	11	9	3	20	272	4	24	417	13	138	76	33	21	342	1068	17	1708	30	42	14	203	7	39	1556	144	2035	38	3	106
LOC116917326	113	84	29	1	26	27	37	57	22	396	6	0	94	11	50	4	78	243	2	26	1	16	10	16	21	1	0	93	3	62	29	21	77	9	74	0	275	6	39	31	93	3	59	93	3	327	4	0	108
LOC116917327	278	131	116	51	94	269	338	381	407	2065	33	12	227	160	410	79	473	1394	58	58	59	84	37	42	144	145	110	737	38	190	74	57	103	463	385	37	1347	24	104	102	301	34	251	522	156	1494	42	30	101
LOC116917329	24	20	15	3	12	8	34	19	32	167	4	0	32	7	50	3	59	155	4	6	18	15	9	9	37	2	16	116	5	35	20	7	34	31	44	0	176	3	20	12	31	3	44	46	28	187	4	1	14
LOC116917330	9	2	1	0	0	3	14	7	4	40	0	0	5	1	5	0	2	13	0	0	0	1	1	3	1	0	1	7	3	3	2	3	0	7	9	0	27	0	4	1	3	0	5	10	0	23	2	1	2
LOC116917331	2	1	0	0	3	11	14	25	11	67	0	3	11	3	20	1	44	82	0	0	0	0	1	2	3	2	5	13	0	0	0	3	7	7	19	0	36	0	0	2	10	0	8	20	7	47	0	1	1
LOC116917334	1	1	0	0	0	3	4	2	4	15	0	0	0	1	3	0	9	13	0	0	0	1	0	0	1	0	0	2	0	0	2	0	2	0	1	0	5	0	0	0	4	0	3	5	0	12	0	0	0
LOC116917335	39	23	11	3	7	4	19	23	22	151	3	3	17	7	21	7	20	78	4	5	7	6	6	4	12	8	5	57	7	13	10	5	3	32	29	0	99	1	2	5	28	7	28	31	11	113	7	1	22
LOC116917338	17	14	3	4	2	5	27	21	36	129	0	3	26	13	49	8	29	128	0	4	3	1	0	5	12	2	7	34	2	12	5	5	6	21	29	2	82	1	11	4	21	5	25	28	14	109	2	4	9
LOC116917339	14	2	2	0	8	6	6	5	5	48	0	0	13	0	8	2	27	50	0	2	1	8	1	8	7	0	0	27	2	3	2	5	4	7	16	0	39	0	1	11	12	0	16	28	7	75	0	0	4
LOC116917344	0	1	0	4	0	5	1	0	0	11	0	1	0	0	0	0	0	1	0	0	2	0	0	0	0	0	0	2	0	1	0	0	0	0	0	0	1	1	1	3	0	0	1	0	0	6	0	0	0
LOC116917347	566	449	164	60	131	794	871	789	530	4354	62	32	511	389	280	97	747	2118	82	131	85	156	65	121	298	127	95	1160	98	403	209	143	163	1016	506	51	2589	60	232	167	704	94	598	1165	233	3253	89	84	266
LOC116917348	457	283	143	50	49	195	351	320	228	2076	44	36	292	174	322	59	254	1181	109	120	38	117	35	50	146	106	77	798	53	311	111	67	108	298	356	32	1336	53	199	109	398	26	311	405	133	1634	49	70	262
LOC116917349	115	103	17	15	84	60	136	247	97	874	4	5	178	31	163	22	327	730	6	27	6	80	21	29	53	7	50	279	8	52	25	39	88	73	220	11	516	12	27	80	148	15	116	342	75	815	10	4	64
LOC116917350	66	6	0	0	0	16	59	40	23	210	0	1	32	11	15	4	49	112	0	1	0	0	0	2	5	1	4	13	0	5	0	7	10	30	49	0	101	1	0	8	25	3	17	85	7	146	0	3	5
LOC116917352	196	136	73	7	55	62	169	232	44	974	8	9	197	19	101	13	246	593	21	39	10	49	15	39	23	5	11	212	18	98	39	30	84	89	188	2	548	17	60	66	175	9	99	310	27	763	9	20	131
LOC116917353	107	126	18	2	16	600	1022	542	905	3338	0	4	348	103	239	29	1722	2445	7	8	4	7	9	10	222	25	24	316	2	37	1	37	80	986	434	19	1596	7	1	25	525	5	815	920	202	2500	5	16	28
LOC116917359	0	9	0	0	2	1	0	1	7	20	0	0	6	0	5	0	7	18	2	0	1	1	1	3	3	4	0	15	5	8	3	2	5	3	10	0	36	1	8	8	5	1	13	6	2	44	0	5	13
LOC116917360	0	1	0	0	0	5	5	1	3	15	2	0	2	0	1	4	6	15	0	1	0	0	0	0	1	0	0	2	1	1	0	0	1	0	0	0	3	1	0	0	0	1	2	5	1	10	0	4	1
LOC116917363	5	0	1	1	6	0	0	2	1	16	0	0	3	0	2	0	4	9	0	0	1	1	0	0	0	0	0	2	0	1	1	0	1	3	1	0	7	0	0	3	1	0	0	4	2	10	1	1	3
LOC116917364	236	75	32	3	30	138	323	242	271	1350	4	6	172	94	342	52	337	1007	15	7	6	22	4	14	113	56	26	263	15	85	28	23	50	424	419	19	1063	1	13	49	196	9	449	378	39	1134	5	10	56
LOC116917366	4	0	1	0	0	0	0	1	0	6	0	0	0	0	1	0	2	3	0	0	0	0	0	0	0	0	1	1	1	0	1	0	0	1	0	0	3	0	0	0	0	0	0	3	0	3	0	2	2
LOC116917367	5	0	1	0	1	2	1	4	0	14	0	0	10	1	1	0	10	22	0	4	0	3	0	0	2	0	0	9	3	2	0	2	8	0	4	0	19	0	3	7	3	0	1	7	6	27	0	0	1
LOC116917368	108	41	21	9	28	57	61	79	37	441	3	2	100	45	73	10	41	274	15	4	11	18	4	9	35	15	8	119	3	45	13	13	10	96	89	7	276	7	17	27	69	11	83	98	9	321	10	10	37
LOC116917369	11	5	3	1	1	0	8	2	5	36	0	0	8	1	6	1	10	26	1	1	1	3	0	2	1	2	1	12	3	2	4	2	9	1	13	0	34	2	8	7	5	0	11	19	0	52	1	1	7
LOC116917370	2	0	0	0	0	0	0	2	0	4	0	0	0	0	0	0	0	0	0	0	0	0	0	0	0	0	0	0	0	1	0	0	0	0	0	0	1	0	1	0	1	0	2	1	0	5	0	0	0
LOC116917371	166	110	106	31	53	197	178	258	154	1253	9	2	136	113	157	31	280	728	35	91	29	19	9	25	119	39	83	449	26	91	138	133	116	241	274	30	1049	8	61	45	132	29	188	363	146	972	103	16	29
LOC116917372	0	2	1	1	0	0	18	3	7	32	0	0	4	0	3	0	62	69	0	3	0	0	0	0	4	0	0	7	0	1	0	1	0	2	6	0	10	0	0	1	8	0	32	36	3	80	4	0	0
LOC116917373	109	65	28	12	38	42	65	75	48	482	4	4	103	45	85	14	125	380	20	15	8	32	18	22	48	4	48	215	12	79	37	18	55	50	118	15	384	13	29	55	92	19	72	168	55	503	15	10	50
LOC116917374	294	280	198	42	128	62	160	230	124	1518	17	21	247	54	191	30	318	878	57	104	34	72	26	101	46	10	45	495	78	368	178	78	153	114	322	10	1301	48	186	86	354	26	129	327	115	1271	98	14	207
LOC116917375	69	50	16	6	16	146	121	94	85	603	4	1	63	31	74	13	107	293	12	21	12	33	2	17	38	9	10	154	17	68	21	12	36	84	111	9	358	9	28	31	72	2	78	108	29	357	17	6	38
LOC116917376	1	0	0	0	0	3	4	2	0	10	0	0	1	0	3	1	3	8	0	0	0	0	0	0	1	0	0	1	0	0	0	0	0	0	1	0	1	0	0	1	1	0	2	0	0	4	0	0	1
LOC116917378	958	92	24	2	30	232	871	1020	208	3437	5	3	419	54	379	20	680	1560	3	11	11	29	11	20	63	5	7	160	0	113	16	27	94	152	881	1	1284	4	16	54	378	6	337	966	31	1792	7	5	64
LOC116917380	200	183	107	20	105	72	79	107	105	978	11	17	125	64	121	27	173	538	54	56	23	49	18	52	49	18	42	361	36	178	101	43	64	100	140	10	672	24	102	87	149	23	108	173	79	745	30	22	187
LOC116917381	142	81	50	21	21	27	44	55	78	519	7	12	79	46	57	14	114	329	37	34	9	28	5	20	31	11	24	199	21	125	61	17	41	42	66	12	385	6	61	30	92	17	57	109	18	390	18	10	102
LOC116917382	45	44	27	4	14	28	65	49	34	310	1	5	73	41	62	11	52	245	6	13	7	30	10	12	18	9	15	120	7	36	20	15	38	50	79	4	249	2	13	29	51	4	70	138	13	320	5	11	34
LOC116917383	15	7	7	0	3	9	13	8	7	69	0	2	7	3	2	0	13	27	1	3	4	4	1	1	0	0	0	14	4	10	4	1	0	12	15	1	47	5	13	2	8	0	5	16	5	54	6	1	9
LOC116917384	97	16	4	2	2	2	7	2	2	134	2	0	14	4	1	0	3	24	0	7	9	3	0	1	1	0	0	21	1	17	4	3	1	3	15	0	44	2	3	1	15	1	1	10	0	33	6	3	11
LOC116917388	106	79	46	6	62	41	92	104	48	584	11	1	110	7	82	13	136	360	6	24	3	41	2	36	37	6	14	169	14	65	45	29	44	53	156	7	413	12	66	78	79	3	97	218	30	583	10	4	150
LOC116917389	108	55	27	9	18	35	46	37	27	362	3	2	68	26	42	14	39	194	10	15	4	14	8	7	27	7	4	96	12	63	23	16	23	57	58	4	256	7	35	15	47	8	52	70	18	252	1	5	69
LOC116917390	150	118	49	17	27	96	226	213	142	1038	5	2	155	82	204	32	270	750	29	39	9	44	20	32	81	19	54	327	10	114	36	40	66	207	221	15	709	16	45	59	202	14	188	314	98	936	18	13	105
LOC116917391	2	0	0	0	0	0	0	0	0	2	0	0	0	0	0	0	0	0	0	0	0	0	1	0	0	0	0	1	0	0	0	0	0	0	4	0	4	0	1	0	0	0	0	1	0	2	0	0	0
LOC116917393	4	0	0	1	7	0	1	0	0	13	0	0	0	0	0	0	0	0	0	1	1	0	0	0	0	0	0	2	1	1	0	0	0	0	0	0	2	1	0	0	0	0	0	0	0	1	0	0	0
LOC116917400	203	186	64	55	40	308	214	166	330	1566	37	14	171	112	191	91	373	989	54	27	69	60	29	34	163	120	95	651	52	73	29	29	57	286	185	46	757	17	54	91	163	32	314	219	150	1040	41	75	58
LOC116917401	325	267	161	58	91	122	147	185	174	1530	42	36	226	113	252	60	280	1009	76	103	28	98	43	96	113	77	122	756	63	354	158	85	150	229	254	34	1327	59	132	89	292	42	203	311	155	1283	89	29	218
LOC116917402	159	156	76	29	66	102	150	190	159	1087	8	9	196	83	160	31	256	743	32	59	16	55	23	47	68	17	90	407	32	102	53	42	112	122	219	43	725	19	100	73	116	16	152	293	100	869	45	35	101
LOC116917403	579	399	157	57	90	327	657	1022	581	3869	44	30	523	215	659	87	1079	2637	144	151	61	161	49	79	270	95	222	1232	80	420	172	87	208	605	639	56	2267	83	200	145	559	66	401	1072	303	2829	51	91	209
LOC116917404	444	186	80	22	51	210	462	760	418	2633	9	21	375	66	474	37	1039	2021	20	77	23	96	25	65	212	8	76	602	38	195	59	58	93	237	700	20	1400	22	89	132	404	23	383	912	223	2188	36	28	117
LOC116917405	566	166	50	41	58	287	727	938	451	3284	16	17	308	172	420	45	857	1835	10	61	18	76	22	44	179	46	72	528	34	156	56	33	100	543	656	21	1599	37	62	77	607	28	304	973	155	2243	41	33	86
LOC116917408	859	636	190	99	147	916	1293	1134	1652	6926	58	30	944	581	1082	281	1425	4401	107	151	120	162	56	77	527	350	292	1842	101	445	191	148	249	1732	1200	113	4179	47	172	179	887	111	1652	1439	535	5022	91	130	281
LOC116917409	1040	273	75	31	182	368	806	1497	284	4556	4	12	924	34	571	45	1853	3443	26	53	3	146	29	72	187	10	36	562	31	167	87	93	306	200	1356	11	2251	18	103	194	816	23	668	2192	147	4161	26	18	206
LOC116917410	35	14	18	5	7	14	16	8	8	125	5	4	22	7	5	3	9	55	5	15	4	2	0	6	10	1	2	45	10	20	8	8	14	16	8	2	86	2	7	6	20	6	6	21	1	69	10	2	27
LOC116917411	201	142	53	15	48	85	119	262	134	1059	6	5	270	27	230	22	460	1020	14	26	11	75	19	62	92	8	29	336	6	100	36	25	85	107	327	11	697	20	50	99	226	13	249	436	87	1180	9	9	99
LOC116917412	520	128	62	26	68	305	687	793	373	2962	7	18	332	128	403	34	757	1679	31	61	13	60	23	44	141	44	79	496	41	144	49	37	97	472	588	24	1452	29	57	87	406	25	339	920	137	2000	24	19	107
LOC116917414	110	82	70	12	15	14	55	57	53	468	17	5	47	41	61	12	57	240	24	33	16	16	5	21	29	13	6	163	26	86	41	16	29	55	76	0	329	3	42	20	49	5	66	79	18	282	10	9	59
LOC116917415	319	219	41	41	60	203	563	755	409	2610	18	16	328	146	426	50	640	1624	27	64	34	113	30	63	197	89	140	757	24	214	44	69	116	499	514	57	1537	20	63	98	296	28	257	761	193	1716	39	38	110
LOC116917416	5	3	0	9	0	3	10	9	7	46	0	1	7	6	19	4	20	57	2	0	0	6	3	1	4	2	6	24	1	7	6	2	7	9	13	5	50	0	2	2	10	5	10	10	11	50	0	1	2
LOC116917417	96	47	19	6	14	30	136	142	127	617	5	4	67	52	146	11	167	452	5	16	18	14	10	7	45	22	32	169	10	44	12	24	41	134	165	13	443	6	25	14	125	0	114	197	59	540	10	8	22
LOC116917418	82	44	9	8	11	63	166	208	124	715	5	13	102	73	146	19	244	602	5	6	2	44	8	17	36	57	33	208	10	34	15	19	24	123	167	13	405	12	18	33	75	2	81	228	57	506	5	9	26
LOC116917419	517	161	68	7	44	344	683	1075	188	3087	18	9	366	54	306	21	872	1646	14	41	19	39	11	32	85	10	26	277	17	81	54	35	109	253	637	17	1203	17	57	101	478	2	242	1105	69	2071	14	16	108
LOC116917420	17	10	10	1	1	9	15	17	21	101	5	1	6	6	15	3	14	50	1	6	1	4	0	1	10	5	4	32	1	7	4	1	9	16	16	1	55	1	3	0	15	1	16	25	5	66	1	3	4
LOC116917421	371	219	134	77	47	281	560	542	880	3111	59	42	358	283	481	103	573	1899	89	131	54	127	50	73	234	219	129	1106	83	272	128	81	147	733	588	91	2123	55	156	130	409	56	347	778	204	2135	69	62	169
LOC116917422	329	312	191	77	86	242	359	459	328	2383	31	21	358	159	358	96	483	1506	68	104	45	117	37	65	175	68	75	754	51	300	134	105	188	349	473	34	1634	40	180	100	376	56	378	552	178	1860	51	44	252
LOC116917423	195	50	22	4	4	74	119	186	71	725	2	2	81	34	39	14	138	310	4	5	2	7	4	6	27	6	3	64	3	44	10	5	12	66	141	1	282	5	12	21	117	2	56	174	27	414	2	0	36
LOC116917425	0	1	0	0	0	2	0	0	0	3	0	0	0	0	0	0	0	0	1	0	0	0	0	0	0	0	0	1	0	0	0	0	0	0	0	0	0	2	0	0	0	0	0	0	0	2	0	0	0
LOC116917426	568	289	103	47	103	293	324	366	348	2441	6	17	597	184	389	59	571	1823	75	58	14	76	34	39	172	27	40	535	32	374	130	108	248	423	501	29	1845	18	86	163	660	27	477	672	144	2247	31	29	284
LOC116917427	179	108	57	6	70	109	207	381	74	1191	6	4	244	20	109	5	350	738	6	21	16	44	7	46	33	5	6	184	19	86	44	24	88	76	327	9	673	25	54	75	226	2	88	570	41	1081	16	7	120
LOC116917428	1	0	2	0	0	2	1	2	1	9	0	0	0	0	0	0	2	2	0	0	0	0	0	0	1	0	0	1	2	0	0	0	0	0	0	0	2	0	0	0	7	1	0	1	3	12	0	0	1
LOC116917431	3	0	2	0	2	2	1	2	5	17	1	3	7	2	4	0	7	24	0	0	0	2	0	1	3	0	3	9	1	0	3	3	0	0	3	0	10	1	5	5	2	2	6	2	3	26	0	1	2
LOC116917435	2182	1411	771	209	568	2977	9556	10324	2759	30757	101	122	2659	707	5352	654	8189	17784	161	502	188	582	168	494	1775	348	394	4612	289	1231	867	557	1055	3903	12089	125	20116	298	764	877	4109	174	6015	18078	1016	31331	309	153	1043
LOC116917436	137	29	7	6	8	47	50	29	9	322	4	0	51	22	4	0	22	103	12	1	10	9	0	7	3	0	5	47	2	35	8	7	1	22	34	1	110	1	2	5	61	2	8	42	5	126	5	5	19
LOC116917437	3	1	0	0	0	2	6	1	0	13	0	0	2	1	2	0	3	8	0	0	0	0	0	0	0	0	0	0	0	1	1	0	1	2	0	0	5	0	0	0	2	0	0	0	2	4	0	0	1
LOC116917438	91	24	27	0	14	27	117	104	46	450	4	5	51	33	60	5	57	215	19	8	1	6	5	6	19	16	10	90	10	45	17	10	5	96	74	5	262	4	15	8	68	4	47	152	10	308	13	11	21
LOC116917441	5	4	1	0	0	3	6	0	2	21	0	0	0	0	0	0	0	0	0	2	0	0	0	0	1	0	0	3	0	0	2	2	0	2	5	0	11	0	2	0	5	1	5	5	2	20	0	0	0
LOC116917443	4	12	4	1	1	3	16	81	67	189	0	1	3	37	6	5	26	78	16	15	21	2	0	16	10	3	4	87	28	93	14	0	5	5	95	0	240	24	0	75	39	6	66	32	21	263	2	2	19
LOC116917446	268	251	147	46	118	130	275	380	177	1792	27	28	314	88	274	58	443	1232	50	117	37	142	42	101	127	18	99	733	60	225	113	75	134	195	342	37	1181	30	153	121	303	36	255	548	157	1603	47	44	251
LOC116917448	84	25	16	0	8	2	12	1	3	151	0	5	27	2	2	2	0	38	11	9	0	9	2	5	5	2	2	45	1	43	8	2	6	0	27	0	87	4	14	16	45	3	3	17	3	105	6	3	31
LOC116917450	5	1	0	0	0	0	0	1	2	9	0	0	1	0	0	1	3	5	0	7	2	0	0	1	2	0	1	13	3	0	0	0	2	4	2	0	11	0	0	4	0	0	1	9	1	15	0	0	0
LOC116917451	274	216	119	22	88	122	258	294	147	1540	14	24	316	70	299	39	406	1168	33	56	20	73	18	53	122	42	67	484	31	165	77	53	202	166	358	24	1076	9	88	132	314	19	273	561	82	1478	22	14	189
LOC116917456	10	8	13	0	7	2	4	4	10	58	3	4	6	3	6	2	18	42	2	6	5	5	2	6	6	4	2	38	10	9	4	7	2	3	13	2	50	5	15	10	21	2	6	13	11	83	0	7	3
LOC116917457	9	0	2	0	0	0	0	0	0	11	0	2	0	0	2	0	0	4	0	1	3	0	0	2	0	0	0	6	0	0	0	0	0	0	1	0	1	0	1	1	1	0	0	1	2	6	7	0	1
LOC116917458	220	101	58	21	66	154	354	425	227	1626	8	12	217	72	253	48	450	1060	39	53	29	91	21	41	95	33	68	470	37	159	66	41	118	249	427	30	1127	22	47	108	288	20	191	554	113	1343	26	28	120
LOC116917459	697	258	131	44	75	303	773	875	516	3672	12	19	651	123	590	77	1053	2525	28	87	21	94	44	40	229	25	87	655	26	248	114	61	167	393	915	17	1941	31	107	134	647	37	636	1107	226	2925	20	45	236
LOC116917460	3	2	0	9	1	2	18	8	5	48	1	1	1	11	16	2	12	44	1	2	0	9	2	0	11	9	21	55	0	5	2	8	2	18	10	4	49	0	0	2	9	2	8	14	18	53	0	2	2
LOC116917461	5	0	0	0	0	1	2	9	5	22	0	0	1	0	9	0	12	22	0	0	0	2	1	0	1	0	1	5	0	1	0	1	1	1	3	0	7	0	1	6	6	0	2	10	1	26	0	0	1
LOC116917462	514	152	78	30	60	273	600	800	517	3024	25	23	300	187	454	54	854	1897	46	86	16	85	30	40	161	78	113	655	26	167	70	42	69	515	580	41	1510	25	65	99	490	22	336	793	177	2007	40	32	120
LOC116917463	583	244	101	57	95	356	964	1103	460	3963	28	9	515	196	675	74	1155	2652	57	63	19	142	46	75	209	92	181	884	62	293	92	94	208	520	891	35	2195	29	95	160	493	37	408	1238	280	2740	50	50	168
LOC116917467	11	3	4	1	1	7	0	11	2	40	0	0	2	4	3	1	6	16	0	3	0	0	0	1	0	0	1	5	0	7	2	2	2	2	3	0	18	2	2	1	7	1	3	7	1	24	1	0	9
LOC116917468	14	23	14	1	9	15	3	4	9	92	4	2	11	7	5	2	6	37	1	7	2	6	4	3	2	2	5	32	4	19	10	5	12	4	7	2	63	1	23	7	8	0	8	17	8	72	5	8	10
LOC116917469	356	211	90	47	102	205	406	504	236	2157	24	26	350	88	344	63	501	1396	39	68	15	80	24	56	115	45	50	492	41	227	91	80	135	283	501	29	1387	28	120	151	355	30	282	718	118	1802	50	29	181
LOC116917470	300	200	85	29	96	164	276	327	183	1660	10	15	336	142	325	48	520	1396	38	65	22	108	37	75	132	85	114	676	31	201	84	99	150	252	398	43	1258	23	70	122	336	30	300	501	185	1567	33	18	148
LOC116917471	102	56	24	13	20	46	122	148	105	636	1	5	130	72	144	30	245	627	7	11	4	32	20	19	53	43	73	262	16	69	26	28	38	103	126	24	430	9	21	54	134	21	105	200	72	616	6	8	22
LOC116917472	2795	1019	349	117	327	1299	2697	3323	1500	13426	53	49	1917	717	2442	320	3804	9302	195	377	95	409	173	204	1041	186	466	3146	129	1305	443	316	721	1995	3117	133	8159	142	343	580	2255	127	2266	3909	906	10528	139	172	731
LOC116917473	25	8	1	2	1	22	45	86	13	203	1	0	28	1	14	0	35	79	0	0	0	3	0	2	8	1	2	16	0	9	1	2	8	11	55	0	86	0	2	7	23	0	14	93	3	142	0	0	9
LOC116917474	68	30	29	6	10	37	95	79	79	433	3	9	60	34	52	6	61	225	4	29	8	9	14	10	24	19	9	126	17	60	16	12	19	97	79	6	306	10	36	32	74	6	34	113	15	320	1	5	35
LOC116917476	1	0	1	0	0	0	0	0	2	4	0	0	0	0	1	1	1	3	0	1	0	0	0	0	1	0	1	3	0	0	1	0	0	0	0	0	1	0	0	0	0	0	1	5	0	6	0	0	0
LOC116917477	0	2	0	0	0	0	1	0	1	4	1	0	0	0	0	0	4	5	0	1	0	0	0	3	1	0	2	7	2	0	0	0	1	1	0	1	5	0	0	0	0	0	1	16	0	17	1	0	1
LOC116917481	144	82	39	2	39	54	88	235	43	726	4	6	127	13	97	15	268	530	3	15	11	48	6	27	23	5	12	150	9	43	26	23	57	46	126	0	330	11	31	59	160	6	54	251	29	601	10	1	64
LOC116917483	274	105	58	10	38	152	368	497	171	1673	14	10	194	64	177	36	475	970	27	31	12	33	9	25	83	23	32	275	22	94	52	37	84	212	401	12	914	16	53	61	223	13	217	459	70	1112	15	14	86
LOC116917484	108	71	24	18	35	70	134	179	94	733	3	7	141	54	150	23	299	677	10	28	4	36	12	26	49	31	61	257	15	75	52	32	55	64	157	18	468	22	27	62	144	12	91	242	80	680	6	4	63
LOC116917485	216	80	30	11	18	97	314	379	179	1324	15	5	118	63	170	25	357	753	9	23	4	28	9	13	59	23	25	193	1	65	33	14	19	224	349	10	715	20	17	29	157	2	152	375	45	797	9	8	44
LOC116917486	0	0	0	0	1	1	0	2	3	7	1	1	2	1	5	0	3	13	0	0	0	1	0	0	5	0	0	6	0	0	0	0	0	1	1	0	2	0	0	0	0	0	3	4	1	8	0	0	2
LOC116917487	136	144	34	3	21	366	222	304	137	1367	2	15	88	39	25	19	355	543	30	46	5	25	2	19	195	9	9	340	19	81	16	5	29	233	268	20	671	8	22	49	82	12	175	632	117	1097	25	11	55
LOC116917490	48	40	21	7	7	11	13	16	16	179	0	3	44	2	22	6	39	116	12	20	8	9	3	7	9	1	4	73	7	34	16	9	21	17	26	1	131	5	24	14	37	1	23	60	10	174	2	3	42
LOC116917491	302	249	69	32	105	151	258	506	160	1832	18	28	467	44	301	36	535	1429	28	96	40	118	33	84	139	8	49	595	49	230	92	86	245	129	427	25	1283	52	105	183	365	43	281	725	146	1900	47	45	211
LOC116917492	39	27	20	7	4	15	86	55	47	300	3	2	38	28	76	11	70	228	1	4	0	7	6	8	18	15	12	71	0	37	4	9	25	79	85	6	245	4	8	14	28	6	63	107	18	248	1	0	18
LOC116917493	173	109	52	30	38	97	186	208	147	1040	11	8	172	79	217	30	301	818	40	58	26	68	31	31	58	24	64	400	45	142	55	35	76	199	198	14	764	21	57	71	239	19	151	334	109	1001	23	23	88
LOC116917494	16	12	6	1	1	26	5	21	1	89	0	1	1	2	3	0	11	18	0	5	0	6	0	3	5	0	1	20	0	7	6	0	4	1	10	0	28	5	1	4	15	0	7	20	1	53	3	0	6
LOC116917495	105	20	10	0	9	53	134	109	41	481	2	6	53	12	23	1	93	190	6	3	1	11	3	16	11	3	4	58	7	37	6	1	13	69	84	2	219	6	17	11	55	0	47	158	12	306	0	1	26
LOC116917496	1139	604	366	110	511	725	766	900	555	5676	181	102	744	290	390	187	987	2881	158	338	99	226	90	237	236	109	70	1563	253	682	344	157	326	838	1178	36	3814	185	436	428	1161	104	725	1388	255	4682	197	118	592
LOC116917497	2436	1758	1152	387	516	1145	1746	2122	1156	12418	248	233	1782	979	1593	393	2174	7402	510	888	275	700	269	531	870	297	532	4872	452	2631	1222	554	853	1768	2393	202	10075	361	966	750	2511	276	1572	2385	928	9749	430	289	1594
LOC116917498	23	12	1	1	4	24	30	41	9	145	0	4	32	3	20	0	41	100	3	9	0	3	0	9	11	1	1	37	1	7	2	5	7	6	33	0	61	2	8	20	10	2	19	68	3	132	0	2	9
LOC116917499	207	98	69	4	35	101	179	238	93	1024	5	2	246	73	122	24	222	694	11	36	11	41	19	28	46	28	42	262	7	74	42	44	65	129	190	9	560	17	51	86	182	8	103	369	73	889	9	17	144
LOC116917500	1030	386	198	52	261	229	642	669	220	3687	61	15	871	266	320	52	441	2026	110	138	52	208	53	133	199	67	123	1083	58	201	126	118	344	534	419	46	1846	33	195	339	594	43	276	862	124	2466	25	101	450
LOC116917501	270	231	153	47	124	146	215	262	280	1728	34	24	261	129	232	65	296	1041	84	98	31	88	36	88	140	121	127	813	40	286	119	86	104	300	333	50	1318	48	114	108	277	40	263	430	142	1422	46	38	226
LOC116917502	117	94	43	9	57	23	39	45	12	439	5	3	68	11	16	2	52	157	7	16	13	26	4	29	10	4	0	109	6	46	33	13	44	18	59	1	220	21	50	57	71	1	24	95	9	328	18	10	71
LOC116917503	56	41	28	3	19	23	48	36	25	279	4	11	35	17	47	1	63	178	8	23	1	14	4	14	15	6	2	87	2	52	17	8	7	39	61	8	194	5	20	22	41	5	27	64	14	198	12	8	33
LOC116917504	41	23	21	1	8	11	18	32	18	173	1	0	22	2	22	0	28	75	4	13	2	7	7	7	5	1	11	57	2	28	7	9	0	14	36	0	96	4	9	8	21	0	16	45	3	106	7	6	20
LOC116917505	11	4	3	2	3	15	7	21	15	81	1	2	9	9	4	4	32	61	1	6	0	3	1	3	2	1	1	18	4	3	3	6	3	25	16	0	60	0	5	4	22	2	16	21	5	75	0	12	7
LOC116917506	110	87	56	21	11	88	50	99	67	589	23	8	54	30	40	17	73	245	13	37	5	13	7	20	28	8	14	145	21	75	25	21	17	78	90	0	327	15	43	15	79	9	47	100	44	352	38	17	57
LOC116917507	408	242	103	48	122	215	573	791	381	2883	21	21	429	197	484	78	815	2045	54	97	33	94	44	63	228	86	83	782	63	303	118	73	185	443	876	54	2115	31	95	152	690	37	406	956	181	2548	21	25	193
LOC116917508	184	166	163	56	45	153	139	186	215	1307	20	12	122	144	144	50	232	724	47	143	42	36	22	46	79	52	60	527	59	169	159	118	87	279	212	30	1113	30	114	51	231	42	234	226	144	1072	67	38	155
LOC116917509	117	82	41	18	36	34	89	160	84	661	11	6	178	25	122	20	246	608	11	31	15	39	9	25	33	17	35	215	4	66	31	25	61	100	165	10	462	22	38	77	163	11	98	334	64	807	9	6	61
LOC116917510	247	99	82	24	44	198	574	570	233	2071	16	12	176	61	261	32	673	1231	20	71	22	53	15	43	101	34	66	425	31	113	42	42	63	281	441	25	1038	18	34	72	328	19	204	729	103	1507	38	8	95
LOC116917511	139	101	69	19	42	62	156	163	132	883	10	16	112	68	121	32	184	543	15	88	16	55	26	45	60	15	33	353	27	119	30	19	44	143	149	16	547	21	72	45	173	29	62	188	65	655	23	16	89
LOC116917512	227	100	64	35	46	146	345	407	183	1553	19	10	189	71	192	34	327	842	24	41	13	45	10	31	70	28	40	302	14	128	51	21	63	239	264	12	792	25	53	49	156	19	175	453	78	1008	36	29	75
LOC116917513	133	72	49	38	62	72	163	194	131	914	19	13	112	62	132	17	232	587	13	27	14	51	25	26	50	25	39	270	37	103	53	34	40	167	182	14	630	30	44	67	182	25	100	212	88	748	43	13	69
LOC116917514	7	0	2	0	0	2	3	0	1	15	0	2	2	1	1	0	3	9	0	0	0	0	0	0	1	0	0	1	0	4	1	0	0	2	3	1	11	0	0	2	1	0	0	9	1	13	2	0	0
LOC116917515	154	99	52	11	42	101	386	407	219	1471	5	6	215	44	261	19	492	1042	12	40	18	67	14	32	85	6	16	290	16	55	37	24	96	204	371	16	819	19	67	74	218	5	195	591	81	1250	23	23	86
LOC116917516	110	50	23	10	57	45	113	80	117	605	13	5	125	57	172	28	208	608	25	19	9	37	3	24	71	20	46	254	12	51	24	20	46	135	187	14	489	9	22	50	127	4	130	219	72	633	5	6	55
LOC116917517	4	1	2	5	1	3	4	6	5	31	0	4	7	7	14	4	6	42	1	2	1	13	0	6	9	6	4	42	3	5	4	2	1	3	3	4	25	1	2	5	4	6	2	25	10	55	0	1	0
LOC116917518	1647	849	250	91	435	637	652	921	614	6096	13	22	2494	177	962	145	2390	6203	45	159	35	468	85	211	462	18	112	1595	46	658	235	278	1002	481	1589	23	4312	78	275	717	1366	55	1555	2319	391	6756	81	53	665
LOC116917519	86	79	38	17	29	53	180	148	211	841	12	12	111	55	162	38	174	564	11	26	14	33	9	32	62	51	48	286	26	85	34	25	59	166	193	23	611	12	37	45	127	18	184	194	73	690	17	18	49
LOC116917520	8	1	5	0	0	7	5	10	4	40	0	1	6	0	5	1	7	20	0	2	1	2	1	0	1	0	0	7	0	2	1	1	0	4	6	0	14	0	1	5	3	1	5	12	0	27	0	0	0
LOC116917521	1	0	1	0	4	0	7	7	2	22	1	0	1	1	7	0	7	17	0	0	0	1	1	0	4	0	1	7	3	0	0	2	3	2	9	1	20	1	1	1	13	0	4	12	1	33	0	0	0
LOC116917522	18	3	4	5	4	0	18	18	2	72	0	1	7	0	3	1	4	16	0	3	1	1	0	0	1	1	2	9	3	2	2	0	3	6	5	0	21	0	2	5	16	1	2	16	0	42	0	3	5
LOC116917524	9	4	2	2	2	0	4	11	2	36	1	3	4	2	1	0	3	14	2	4	1	0	0	2	2	1	1	13	1	0	7	0	2	1	4	2	17	0	1	2	16	0	0	9	1	29	1	0	6
LOC116917527	0	0	0	0	1	0	0	2	0	3	0	0	1	0	1	0	3	5	0	0	0	0	0	1	0	0	0	1	0	0	1	0	1	0	1	0	3	0	0	1	0	0	5	3	0	9	0	0	1
LOC116917528	62	47	19	8	35	18	46	57	40	332	5	1	89	10	41	6	110	262	9	12	5	19	7	16	21	2	2	93	11	36	16	15	44	26	81	6	235	8	17	30	45	5	43	153	29	330	15	8	39
LOC116917529	0	0	0	0	0	0	0	1	0	1	0	0	0	1	0	0	2	3	0	1	0	0	0	0	0	0	0	1	3	0	0	0	0	0	1	0	4	0	0	0	0	0	1	0	0	1	0	0	0
LOC116917530	13	7	11	2	0	1	4	9	1	48	1	2	8	4	1	2	5	23	4	2	2	0	1	4	2	3	0	18	6	12	16	3	7	8	7	0	59	3	10	6	11	0	1	8	6	45	5	1	14
LOC116917531	102	113	49	12	45	47	76	100	28	572	5	4	129	17	63	4	158	380	5	34	9	58	4	42	39	5	4	200	18	77	66	45	45	21	134	0	406	21	75	72	117	8	71	194	29	587	13	12	130
LOC116917533	3	0	1	1	0	1	3	1	1	11	0	0	3	0	3	0	5	11	0	1	1	2	0	0	0	0	0	4	0	0	4	0	0	0	1	0	5	1	1	1	0	0	2	7	1	13	0	4	0
LOC116917534	2	0	0	0	0	0	0	0	2	4	0	0	3	0	2	0	7	12	0	0	1	1	0	1	1	0	0	4	0	0	0	0	1	0	5	0	6	0	1	1	1	0	2	2	3	10	0	1	0
LOC116917535	193	154	96	16	71	134	296	377	204	1541	20	12	254	62	288	35	470	1141	19	83	14	68	21	59	95	27	38	424	24	170	71	42	105	182	340	26	960	38	99	79	290	21	231	508	117	1383	39	27	128
LOC116917536	18	4	0	0	0	12	19	1	6	60	1	5	1	1	7	0	4	19	0	0	2	0	2	1	4	0	0	9	0	0	2	0	2	3	5	0	12	2	4	2	13	0	2	1	0	24	0	0	3
LOC116917537	460	112	51	20	52	453	1324	1440	565	4477	23	28	346	139	833	83	1425	2877	22	60	52	56	30	43	237	42	83	625	44	155	43	47	78	830	1258	23	2478	20	68	87	650	13	617	1881	203	3539	45	31	60
LOC116917538	202	96	41	14	14	230	450	464	340	1851	20	11	185	90	293	15	544	1158	9	26	23	36	13	11	82	14	43	257	47	96	33	19	40	382	374	18	1009	11	36	39	261	10	177	554	92	1180	21	20	37
LOC116917539	7	1	0	0	1	0	1	5	0	15	1	0	0	0	3	0	2	6	0	2	0	0	0	1	0	0	0	3	0	0	0	2	7	2	0	0	11	1	0	2	1	0	3	5	0	12	0	1	3
LOC116917540	300	277	136	57	172	135	200	312	181	1770	38	38	366	97	305	53	499	1396	83	87	39	173	59	133	115	59	134	882	52	304	154	94	184	209	339	52	1388	46	187	201	394	55	206	523	183	1795	63	58	290
LOC116917541	2361	1518	1030	238	1187	1061	1109	1403	806	10713	278	183	2147	772	873	236	1672	6161	362	826	175	822	173	659	386	178	174	3755	406	1783	641	295	952	1320	1437	52	6886	412	784	1131	2926	237	872	2736	425	9523	549	295	1622
LOC116917542	97	62	29	6	31	59	91	157	39	571	7	10	136	41	93	21	178	486	8	26	6	40	7	22	27	7	22	165	22	59	19	23	45	89	149	8	414	15	29	41	142	16	90	227	50	610	1	7	60
LOC116917543	257	122	43	31	65	146	278	414	171	1527	12	9	269	69	313	47	553	1272	15	61	4	86	22	48	146	11	63	456	20	151	62	67	96	140	459	10	1005	21	73	91	326	26	302	607	141	1587	34	8	76
LOC116917544	67	24	21	7	14	15	33	38	22	241	4	1	52	10	43	6	68	184	9	7	1	15	3	7	8	3	10	63	9	31	5	11	16	36	41	4	153	1	26	22	55	0	34	82	11	231	4	4	27
LOC116917545	4	4	9	1	10	12	7	9	19	75	1	0	5	10	26	0	33	75	1	3	1	0	2	2	6	2	8	25	1	2	3	5	4	4	16	1	36	1	0	5	12	2	8	21	9	58	0	1	2
LOC116917546	107	84	44	16	30	64	144	105	196	790	12	15	85	41	127	26	194	500	3	36	11	23	13	17	52	27	23	205	18	48	25	27	40	116	167	5	446	9	45	43	106	10	176	157	46	592	19	15	38
LOC116917547	133	80	9	28	62	89	125	181	137	844	3	2	249	130	263	54	373	1074	44	13	4	66	20	25	104	106	145	527	4	74	28	49	80	172	195	86	688	3	15	155	189	18	161	408	157	1106	2	15	17
LOC116917548	98	58	10	1	7	28	23	32	12	269	3	2	41	12	20	2	38	118	16	8	5	18	6	8	11	4	3	79	11	59	21	5	12	23	36	0	167	2	25	10	26	2	9	49	11	134	5	5	47
LOC116917549	3024	1319	280	114	256	938	1527	3683	894	12035	17	29	2478	303	1638	118	3938	8521	70	186	31	423	117	239	665	31	195	1957	73	1053	261	310	763	687	2202	26	5375	101	288	730	2578	70	1477	4808	532	10584	72	44	748
LOC116917550	1043	506	126	31	299	334	280	631	358	3608	6	14	1470	125	575	105	1495	3790	62	92	21	277	71	116	308	11	85	1043	22	414	190	137	513	301	1047	23	2647	34	162	468	940	49	858	1567	284	4362	32	54	411
LOC116917551	3	2	0	0	0	0	1	4	0	10	0	0	2	0	0	0	2	4	0	0	0	0	0	0	0	0	0	0	0	0	0	0	0	1	1	0	2	0	0	0	0	1	1	2	0	4	0	0	1
LOC116917552	84	34	7	1	11	45	528	519	112	1341	0	0	326	38	52	3	443	862	11	0	2	3	3	7	15	1	2	44	2	0	4	5	20	334	325	0	690	1	1	14	189	2	171	556	3	937	1	13	22
LOC116917553	238	77	53	20	6	227	623	598	392	2234	22	26	124	62	262	27	635	1158	33	35	30	34	22	23	70	35	88	370	32	92	40	25	27	331	470	33	1050	19	21	31	260	15	152	731	104	1333	22	12	52
LOC116917554	190	112	51	31	42	158	356	321	494	1755	14	22	170	138	313	69	425	1151	24	47	20	62	14	30	141	61	119	518	25	141	62	47	84	463	352	74	1248	27	59	59	306	26	222	407	173	1279	27	21	71
LOC116917555	51	35	6	4	4	178	1240	385	375	2278	1	1	244	67	107	29	1213	1662	4	0	1	6	2	10	67	5	19	114	0	4	0	13	20	506	236	4	783	1	0	22	458	3	314	764	33	1595	11	2	5
LOC116917556	134	22	10	1	2	96	556	733	75	1629	2	1	352	18	57	7	335	772	5	0	4	10	1	12	18	0	8	58	7	2	0	8	23	237	348	0	625	6	4	20	230	4	169	574	4	1011	12	18	17
LOC116917557	74	63	14	15	44	54	94	145	76	579	3	3	93	27	101	24	181	432	4	14	2	43	3	29	47	11	33	186	20	73	24	28	37	68	139	8	397	9	19	35	86	4	70	201	70	494	16	6	35
LOC116917558	199	139	88	41	74	126	151	144	131	1093	12	18	228	80	163	28	239	768	28	67	34	58	24	55	94	36	83	479	48	220	89	54	126	156	209	10	912	15	78	99	281	24	190	244	114	1045	43	29	174
LOC116917559	374	238	98	52	119	131	361	397	219	1989	24	22	318	125	324	70	450	1333	49	118	57	110	29	73	122	87	137	782	51	266	115	66	131	254	415	47	1345	35	146	111	315	47	248	575	180	1657	46	29	177
LOC116917560	109	54	21	2	7	58	54	54	31	390	9	9	48	42	35	5	27	175	19	33	5	18	7	12	14	8	1	117	9	72	24	11	19	54	56	9	254	9	22	11	86	8	33	59	25	253	19	11	34
LOC116917561	37	29	21	3	19	6	8	17	26	166	1	6	38	5	13	3	21	87	8	19	1	15	5	16	5	2	4	75	8	34	16	8	34	7	37	2	146	10	23	14	22	2	16	19	6	112	7	5	33
LOC116917562	41	33	20	10	18	22	59	64	74	341	5	8	47	33	62	28	73	256	7	22	1	28	3	18	37	21	47	184	11	49	17	22	25	85	75	26	310	11	15	12	60	5	45	104	41	293	4	4	39
LOC116917563	164	62	33	13	16	60	149	319	91	907	1	3	150	17	185	15	391	762	6	14	7	28	4	19	61	1	22	162	15	56	26	20	44	58	280	8	507	10	24	54	203	10	163	372	67	903	19	11	57
LOC116917564	636	436	184	64	167	493	903	1604	977	5464	40	19	1005	337	1042	121	2828	5392	68	125	47	170	82	120	340	111	349	1412	64	304	144	146	340	905	1463	137	3503	68	129	287	1126	54	839	2332	564	5399	68	91	303
LOC116917565	222	89	38	22	28	103	381	447	214	1544	5	17	141	86	199	33	418	899	19	32	13	47	14	33	72	14	35	279	18	82	29	19	31	223	290	9	701	15	40	42	221	11	155	421	58	963	26	6	57
LOC116917566	160	83	44	12	35	112	235	206	234	1121	16	9	115	76	141	18	236	611	29	37	18	44	8	24	70	35	47	312	20	122	40	25	28	194	166	13	608	11	38	34	165	29	116	248	39	680	22	20	50
LOC116917567	234	80	75	13	45	93	225	222	83	1070	11	6	123	57	99	30	187	513	14	27	17	18	7	22	63	12	9	189	21	96	29	16	43	144	224	9	582	9	45	37	220	7	96	265	35	714	28	12	98
LOC116917568	47	43	32	4	0	531	1088	472	454	2671	1	4	83	18	48	12	1552	1718	3	2	0	1	8	4	287	16	12	333	0	89	0	2	31	492	282	11	907	12	1	25	98	0	696	1160	94	2086	162	0	7
LOC116917569	674	133	83	30	36	330	849	1092	270	3497	10	11	282	95	240	20	758	1416	25	32	7	47	13	22	94	9	42	291	25	150	29	41	64	384	541	9	1243	22	50	75	516	6	263	1043	92	2067	12	10	114
LOC116917570	10	11	0	0	9	6	17	24	13	90	0	0	12	4	11	0	18	45	0	7	0	4	0	4	6	2	0	23	0	5	4	4	18	13	13	1	58	1	2	2	6	1	14	15	4	45	2	0	2
LOC116917571	7	3	0	0	0	3	4	6	3	26	0	0	4	0	4	2	11	21	1	2	0	1	0	1	1	1	1	8	1	4	2	1	3	4	3	0	18	0	2	5	2	4	3	4	1	21	0	0	5
LOC116917573	270	320	269	56	52	166	148	285	313	1879	63	43	205	112	151	41	215	830	103	180	72	62	41	61	86	34	36	675	71	292	265	115	132	255	262	12	1404	74	243	68	194	41	247	237	134	1238	107	70	280
LOC116917574	348	153	101	27	47	219	574	704	174	2347	15	17	179	51	320	10	616	1208	27	48	15	59	19	30	70	11	29	308	29	193	84	39	47	254	595	9	1250	36	84	85	398	17	164	917	96	1797	29	14	132
LOC116917575	324	176	95	12	70	194	409	736	214	2230	20	6	290	40	370	24	779	1529	8	68	22	70	22	64	108	10	32	404	48	167	63	40	62	183	542	5	1110	31	97	89	338	23	231	884	104	1797	25	18	120
LOC116917577	14	14	7	0	4	11	13	33	8	104	7	0	13	0	16	0	20	56	2	2	0	4	1	6	4	6	1	26	1	5	1	4	11	7	14	2	45	2	2	10	20	4	6	22	2	68	0	5	13
LOC116917578	0	0	1	0	0	1	1	2	0	5	1	0	0	0	2	0	1	4	0	0	0	0	0	0	0	0	0	0	0	0	0	0	0	0	1	0	1	0	0	0	0	0	2	0	1	3	0	0	0
LOC116917580	364	175	82	44	76	258	543	579	509	2630	24	21	326	144	323	58	701	1597	43	76	46	84	29	30	146	52	112	618	44	196	79	53	92	444	573	59	1540	30	88	93	365	18	291	837	170	1892	35	31	145
LOC116917581	478	356	191	47	168	172	327	502	169	2410	13	19	521	77	326	38	543	1537	35	99	24	155	25	120	142	15	40	655	42	363	165	108	237	209	506	31	1661	35	181	219	504	33	343	871	99	2285	32	19	400
LOC116917582	391	139	21	2	1	936	343	903	56	2792	6	7	30	44	17	11	393	508	12	42	3	2	1	4	118	0	4	186	15	90	58	14	12	207	398	2	796	7	31	11	124	6	60	727	56	1022	31	1	84
LOC116917583	1	0	1	0	0	2	1	1	0	6	0	0	0	0	0	0	0	0	0	0	0	0	0	0	0	0	0	0	0	0	0	0	0	0	2	0	2	0	0	0	0	0	0	0	0	0	0	0	0
LOC116917584	6	0	3	0	0	0	2	2	1	14	0	0	3	0	0	0	5	8	0	1	1	0	0	0	0	0	0	2	0	0	0	0	0	0	1	0	1	0	0	0	4	0	0	4	0	8	0	0	0
LOC116917585	226	145	49	26	35	175	220	211	176	1263	12	18	257	112	258	33	276	966	23	36	34	45	11	29	99	36	34	347	23	78	45	51	95	274	290	16	872	8	62	83	203	30	366	307	67	1126	17	58	105
LOC116917586	9	3	0	3	0	1	9	12	4	41	0	2	3	0	5	2	3	15	2	3	0	0	0	0	3	0	3	11	0	5	2	2	0	6	7	1	23	2	0	4	3	0	11	16	0	36	0	0	1
LOC116917587	1	2	0	0	0	14	15	13	6	51	1	0	1	3	3	0	10	18	0	0	0	2	0	0	0	0	0	2	0	1	4	0	0	4	8	0	17	1	0	0	1	0	4	5	3	14	0	0	0
LOC116917589	0	2	2	0	0	0	0	0	0	4	0	1	0	0	0	0	0	1	2	1	0	0	0	0	0	0	0	3	0	0	0	0	2	0	1	0	3	0	0	0	0	0	0	0	0	0	0	0	0
LOC116917590	3	0	2	5	0	0	0	0	1	11	0	3	3	0	0	0	0	6	0	0	0	0	0	0	0	0	0	0	0	6	5	0	0	0	2	0	13	0	0	0	1	0	1	0	0	2	2	0	3
LOC116917591	17	3	0	0	1	5	1	5	0	32	0	0	0	1	1	0	7	9	0	9	1	0	0	0	5	0	1	16	1	5	2	4	0	3	7	0	22	1	1	0	1	2	0	3	0	8	2	2	3
LOC116917592	15	15	11	0	3	2	6	6	4	62	1	0	8	1	1	1	11	23	0	3	2	3	1	2	3	1	5	20	3	12	8	3	3	1	11	0	41	0	11	3	4	0	8	15	0	41	6	2	26
LOC116917596	4	7	8	0	4	2	8	7	2	42	2	0	4	0	9	1	8	24	0	1	1	1	0	2	2	0	0	7	1	6	2	1	0	2	8	0	20	1	2	6	5	0	8	10	1	33	7	0	3
LOC116917597	95	57	25	10	12	53	142	192	50	636	7	2	129	10	138	13	172	471	7	31	6	29	7	14	46	2	12	154	8	52	21	23	39	53	151	3	350	7	47	59	113	3	91	298	48	666	11	4	76
LOC116917598	75	52	2	24	18	50	121	179	131	652	3	5	138	63	170	22	193	594	21	12	1	57	20	15	80	34	95	335	3	57	8	29	42	122	120	51	432	4	8	55	80	14	83	236	74	554	0	11	8
LOC116917599	28	23	6	2	23	12	66	82	70	312	0	1	72	19	116	12	163	383	0	11	0	33	4	13	49	14	37	161	3	25	10	32	28	57	102	7	264	3	8	21	77	8	64	206	44	431	4	3	12
LOC116917600	6	2	0	0	0	0	5	7	2	22	0	1	1	1	6	0	6	15	1	0	0	1	1	0	1	0	1	5	0	1	0	1	2	2	6	0	12	1	2	1	2	3	6	13	0	28	0	0	0
LOC116917601	130	106	43	19	23	48	92	68	75	604	11	13	84	60	76	11	70	325	18	43	12	36	7	22	31	21	13	203	21	138	47	24	40	65	104	19	458	23	56	40	112	7	63	122	39	462	15	6	80
LOC116917603	79	32	27	2	13	23	108	44	48	376	4	3	39	24	47	9	104	230	14	7	3	3	3	7	19	5	11	72	12	44	10	16	12	46	84	0	224	10	20	14	49	0	52	105	23	273	19	7	25
LOC116917604	201	168	68	20	46	147	219	293	210	1372	5	12	198	107	204	25	235	786	42	63	22	43	19	25	103	52	76	445	30	175	60	41	94	253	220	44	917	11	62	53	205	29	186	278	111	935	8	18	108
LOC116917605	745	427	202	52	140	318	665	717	600	3866	32	34	697	329	796	116	828	2832	73	118	58	164	58	119	302	86	126	1104	66	374	173	126	315	632	716	31	2433	54	201	212	507	77	814	908	213	2986	53	83	316
LOC116917606	56	36	13	6	12	37	76	64	85	385	3	3	44	39	89	21	95	294	12	9	3	22	2	9	44	17	21	139	1	36	11	5	11	74	68	7	213	4	14	29	66	4	67	104	20	308	5	3	34
LOC116917607	0	2	0	0	0	0	1	0	0	3	0	0	0	1	0	0	0	1	0	0	0	0	0	0	0	0	1	1	0	0	0	0	0	0	0	0	0	1	2	3	1	0	0	3	3	13	0	4	3
LOC116917610	1	0	2	0	2	0	1	4	3	13	0	0	0	0	8	0	10	18	0	0	0	2	0	0	0	0	0	2	0	0	0	2	0	3	4	0	9	0	1	0	6	0	1	2	1	11	0	0	0
LOC116917611	118	61	24	6	19	55	130	101	55	569	3	7	69	37	75	20	58	269	17	7	5	15	5	10	33	20	7	119	22	54	22	12	22	104	112	9	357	2	9	12	94	13	85	142	15	372	6	8	41
LOC116917612	99	43	22	2	37	20	91	137	21	472	3	1	105	6	40	1	139	295	4	7	7	28	3	9	12	0	6	76	2	35	16	9	49	22	115	0	248	6	8	41	83	0	30	240	8	416	5	1	56
LOC116917616	68	70	30	12	34	31	42	70	25	382	2	5	105	13	47	19	98	289	8	21	16	15	13	26	29	13	18	159	12	68	42	22	40	30	83	4	301	19	36	60	74	6	55	121	31	402	29	4	58
LOC116917617	65	29	14	5	29	13	36	55	33	279	1	8	45	9	61	2	90	216	4	11	2	12	6	19	15	1	5	75	17	29	14	14	40	20	53	0	187	16	22	36	70	4	51	57	22	278	10	2	34
LOC116917618	9	4	4	0	0	2	1	2	1	23	0	1	2	1	2	0	2	8	4	0	0	0	3	4	0	0	1	12	0	2	14	4	2	1	4	0	27	0	6	1	15	0	2	5	3	32	9	2	7
LOC116917619	38	23	23	3	27	11	9	14	7	155	0	3	37	0	3	0	53	96	1	5	2	13	2	5	7	0	0	35	5	11	12	10	27	4	26	0	95	11	16	24	27	4	39	33	25	179	6	1	27
LOC116917620	116	79	28	9	14	67	291	440	142	1186	6	5	150	7	275	13	585	1041	9	14	3	23	8	17	61	3	18	156	6	48	23	24	51	104	380	12	648	10	32	57	187	6	130	562	68	1052	6	1	33
LOC116917624	17	1	4	1	8	0	11	13	7	62	0	0	10	1	7	3	12	33	2	8	0	2	3	4	0	0	3	22	1	3	3	0	1	7	14	2	31	1	5	1	7	1	8	16	1	40	0	7	2
LOC116917626	91	76	29	8	20	59	226	315	120	944	7	6	266	68	275	16	445	1083	8	33	10	67	21	29	67	22	71	328	12	72	32	40	56	167	301	26	706	12	36	62	180	11	107	561	79	1048	8	3	47
LOC116917627	58	39	24	12	22	32	55	66	27	335	0	1	89	18	55	6	118	287	8	16	10	30	8	20	20	8	13	133	12	38	20	22	42	33	84	1	252	4	38	23	44	5	58	150	13	335	3	6	57
LOC116917628	73	16	23	4	8	39	119	112	14	408	4	1	40	10	9	0	49	113	1	6	7	3	7	6	10	0	1	41	5	19	4	3	8	44	40	1	124	6	11	4	66	2	33	90	2	214	6	10	15
LOC116917629	201	75	36	27	16	157	353	350	283	1498	20	5	102	88	234	23	376	848	20	18	12	31	16	27	80	39	54	297	35	89	18	25	34	319	315	35	870	10	20	36	266	9	155	409	81	986	46	12	32
LOC116917630	104	19	20	0	0	33	105	148	63	492	3	5	38	6	47	5	128	232	2	9	0	7	1	1	17	2	8	47	7	23	6	1	6	81	95	3	222	3	8	4	61	2	49	110	16	253	1	4	3
LOC116917631	0	0	0	0	0	0	1	0	3	4	0	0	0	0	0	0	1	1	0	0	0	0	0	0	0	0	0	0	0	0	0	0	0	5	1	0	6	0	0	0	0	0	0	1	0	1	0	0	0
LOC116917633	60	94	15	0	0	553	326	453	88	1589	0	5	4	12	5	17	513	556	7	16	0	4	0	3	139	5	6	180	0	57	0	0	6	163	361	6	593	9	0	9	36	0	89	704	88	935	8	2	5
LOC116917634	202	168	75	45	127	146	251	342	283	1639	19	21	317	150	368	49	501	1425	42	53	28	141	34	71	158	98	153	778	39	181	83	82	221	239	329	35	1209	26	68	160	307	53	277	502	209	1602	27	36	133
LOC116917635	545	426	231	126	257	210	254	299	153	2501	34	43	509	105	315	59	565	1630	65	193	38	279	84	186	140	16	151	1152	98	573	312	175	329	173	504	26	2190	109	291	290	660	68	332	681	251	2682	94	55	388
LOC116917636	39	46	28	3	18	41	124	171	54	524	4	3	137	19	115	14	220	512	6	6	2	27	4	14	25	6	5	95	2	27	17	16	56	56	138	2	314	6	17	59	102	1	74	263	16	538	0	1	49
LOC116917637	258	103	39	20	27	47	151	185	24	854	7	11	331	142	55	17	15	578	15	11	12	20	10	18	43	13	10	152	20	23	21	25	42	93	51	3	278	1	37	51	133	3	24	141	11	401	8	17	64
LOC116917639	128	63	41	15	30	65	75	127	80	624	8	11	118	21	142	26	122	448	17	26	7	35	9	22	52	33	40	241	9	88	35	22	60	101	144	8	467	15	22	38	135	5	101	215	74	605	9	13	82
LOC116917641	115	57	11	2	189	20	40	53	14	501	6	3	333	16	29	11	15	413	3	12	3	66	8	36	20	0	11	159	3	9	12	27	196	59	43	1	350	5	20	249	36	3	46	216	4	579	10	22	91
LOC116917643	65	22	20	8	32	44	141	128	44	504	9	4	83	14	64	7	136	317	4	6	3	13	3	9	17	3	8	66	5	24	8	17	35	76	124	4	293	5	14	13	55	1	70	188	27	373	4	1	25
LOC116917646	31	19	15	2	4	7	2	4	12	96	2	0	10	14	10	2	8	46	6	8	1	9	1	5	4	2	3	39	2	19	11	5	7	17	14	0	75	4	13	3	10	2	11	14	5	62	2	5	25
LOC116917647	78	55	54	7	28	36	37	29	27	351	11	9	30	21	30	0	56	157	21	27	7	37	5	18	19	4	11	149	20	97	37	16	23	61	67	1	322	15	52	29	98	9	38	58	21	320	21	5	52
LOC116917648	303	194	61	21	83	174	344	569	194	1943	12	7	387	109	361	38	597	1511	18	64	13	61	28	55	115	19	38	411	35	196	52	53	150	193	404	20	1103	33	76	129	386	16	249	753	90	1732	21	17	144
LOC116917649	370	245	137	34	88	216	409	388	218	2105	24	23	318	121	374	49	438	1347	42	91	29	99	31	79	135	71	78	655	48	278	122	69	148	288	529	21	1503	45	105	139	366	33	309	603	89	1689	37	32	242
LOC116917651	253	161	127	24	35	142	271	238	166	1417	25	17	169	105	146	42	253	757	38	55	38	60	14	42	67	43	72	429	28	208	133	63	58	274	300	26	1090	40	109	48	220	33	206	256	80	992	32	42	133
LOC116917654	452	325	166	54	122	230	518	622	374	2863	35	44	435	115	470	56	711	1866	46	166	60	112	29	95	202	35	68	813	98	350	137	67	144	348	601	36	1781	72	203	166	420	42	341	775	146	2165	60	65	232
LOC116917655	161	98	32	15	263	42	32	23	30	696	4	6	181	9	84	24	164	472	10	42	10	86	5	47	47	4	12	263	6	51	42	45	419	37	96	1	697	11	56	164	91	8	134	98	43	605	12	17	83
LOC116917657	1559	584	192	80	168	1166	2534	2965	2114	11362	77	49	1311	515	2175	235	3527	7889	80	200	88	301	109	149	757	134	380	2198	95	656	205	198	385	1689	2875	114	6217	93	159	285	1615	91	1849	3237	830	8159	121	64	307
LOC116917658	75	43	7	7	5	53	60	71	30	351	2	4	48	8	31	2	94	189	3	18	0	8	8	6	12	0	7	62	8	24	10	12	21	26	82	4	187	4	26	21	58	1	66	107	14	297	1	4	33
LOC116917659	27	25	7	2	27	8	16	23	1	136	0	0	45	0	15	4	70	134	0	5	0	9	1	11	8	0	1	35	3	14	10	4	34	6	64	0	135	3	14	29	19	2	22	98	1	188	2	2	31
LOC116917660	577	627	420	103	236	294	258	459	339	3313	52	49	452	209	309	80	505	1656	101	370	124	238	63	200	208	52	80	1436	196	680	343	167	244	228	450	23	2331	143	426	267	531	74	280	532	190	2443	162	92	525
LOC116917661	370	265	133	54	100	80	128	110	103	1343	30	28	232	142	116	24	196	768	63	159	24	73	42	83	40	30	77	591	57	392	140	72	82	160	215	23	1141	68	110	106	274	34	129	243	103	1067	81	30	202
LOC116917662	1418	931	397	147	299	796	1485	1914	1080	8467	93	71	1483	720	1509	246	1814	5936	265	370	72	334	139	235	581	368	393	2757	148	1058	385	263	485	1703	1611	153	5806	119	379	479	1858	121	1087	2440	609	7092	171	120	616
LOC116917663	128	49	56	2	13	77	141	240	68	774	7	7	116	18	119	12	228	507	5	24	7	31	5	25	39	7	18	161	12	57	19	26	31	67	185	4	401	16	42	40	146	17	80	281	50	672	5	14	66
LOC116917664	28	30	22	11	22	11	8	12	8	152	2	4	22	12	9	4	24	77	8	10	3	19	7	8	2	1	1	59	12	38	24	6	25	7	11	0	123	7	18	16	25	2	13	15	3	99	11	1	28
LOC116917665	229	103	64	18	46	152	271	383	180	1446	11	21	160	50	234	24	409	909	23	83	19	31	20	40	73	30	32	351	39	131	68	24	56	191	295	14	818	22	62	63	234	9	113	417	65	985	20	15	110
LOC116917666	0	0	0	0	0	28	0	0	0	28	0	0	7	0	0	0	0	7	1	0	0	0	0	3	0	0	2	6	0	2	0	1	3	1	1	0	8	0	0	1	1	2	0	9	0	13	0	0	0
LOC116917667	43	17	20	7	20	248	293	118	253	1019	3	1	65	37	176	44	724	1050	12	4	3	21	6	12	102	18	41	219	4	23	3	15	16	91	205	21	378	8	2	35	157	2	211	353	167	935	3	7	8
LOC116917668	1143	617	294	49	159	677	1804	2383	759	7885	52	44	878	204	1130	78	2410	4796	81	178	82	171	75	211	363	35	103	1299	144	520	243	164	317	772	1960	37	4157	121	300	290	1184	72	875	3227	266	6335	108	45	527
LOC116917669	212	119	88	14	41	89	162	289	69	1083	8	3	198	17	151	10	387	774	4	37	7	24	2	53	54	1	20	202	22	93	43	43	83	60	261	3	608	16	60	68	182	5	163	382	48	924	18	8	146
LOC116917670	148	78	28	13	7	334	542	248	856	2254	4	6	167	143	249	68	1381	2018	2	11	15	18	7	5	116	81	83	338	9	12	2	19	32	489	259	20	842	5	0	29	343	21	394	598	299	1689	26	13	23
LOC116917671	10232	5176	1440	877	1894	5704	9704	12706	6880	54613	271	388	10272	2057	12314	1865	22207	49374	505	1459	448	2143	799	1529	4995	399	2174	14451	764	4811	1917	1623	3505	5165	16763	303	34851	714	1838	3453	11390	774	13339	19908	4994	56410	882	607	2831
LOC116917672	467	131	124	19	65	207	432	580	283	2308	16	14	269	99	288	37	636	1359	26	59	17	64	26	28	108	28	57	413	30	136	68	47	76	301	433	35	1126	14	51	74	361	13	235	609	120	1477	23	27	102
LOC116917673	117	40	19	19	1	182	344	219	221	1162	2	3	62	33	73	27	570	770	6	17	9	7	4	7	69	12	34	165	16	13	9	9	11	188	216	8	470	9	3	10	135	4	193	399	137	890	21	15	12
LOC116917674	3	1	0	0	0	1	11	13	7	36	2	1	4	2	9	1	3	22	0	0	0	0	2	0	1	5	2	10	0	0	1	0	0	28	19	0	48	0	0	0	4	0	6	13	2	25	0	1	2
LOC116917675	156	16	58	19	13	155	797	214	845	2273	0	3	161	121	299	104	1611	2299	1	0	7	22	11	7	279	118	88	533	3	42	4	23	27	680	314	56	1149	6	8	56	353	16	849	712	375	2375	174	11	7
LOC116917676	527	314	215	86	138	562	1004	936	1147	4929	82	40	693	387	1100	288	932	3522	133	154	56	145	82	72	556	437	289	1924	84	474	151	108	274	1270	900	150	3411	86	209	200	719	62	1135	1249	423	4083	68	60	242
LOC116917677	84	39	25	8	10	15	52	87	35	355	0	2	94	8	74	17	99	294	3	14	3	37	3	28	18	15	16	137	6	37	26	11	20	33	81	12	226	8	12	50	52	6	57	214	25	424	0	2	40
LOC116917678	335	272	144	18	125	145	302	361	176	1878	25	14	411	166	345	69	301	1331	27	88	37	135	28	111	119	55	46	646	41	190	92	46	148	174	454	12	1157	40	180	197	342	32	295	546	61	1693	20	40	223
LOC116917679	421	206	141	47	107	188	317	293	168	1888	18	39	287	64	225	45	437	1115	25	96	35	83	26	74	113	29	35	516	69	277	117	57	152	238	473	7	1390	65	140	107	357	25	275	427	84	1480	64	25	191
LOC116917680	24299	8135	2659	622	2742	7487	12177	11856	11958	81935	134	166	17990	8661	11289	2410	20175	60825	1938	1076	233	3077	961	868	6561	1931	2218	18863	226	9368	2575	2417	6008	18041	15584	1093	55312	153	1740	4923	15910	1026	12709	13938	5361	55760	128	489	5736
LOC116917681	246	160	56	22	35	75	230	198	102	1124	8	10	219	55	147	9	178	626	10	59	10	33	24	24	45	13	26	244	20	185	45	29	58	176	212	12	737	21	62	63	203	10	132	341	36	868	21	19	157
LOC116917682	174	60	18	5	18	94	250	320	61	1000	1	2	152	18	140	18	325	656	3	26	8	25	10	25	56	4	17	174	3	45	14	15	57	87	314	5	540	8	22	62	173	1	139	507	22	934	0	5	45
LOC116917683	203	100	47	19	62	85	212	285	66	1079	0	2	244	21	157	11	305	740	2	16	5	43	13	63	35	6	26	209	15	49	28	33	104	94	283	5	611	6	37	53	168	4	143	503	29	943	4	11	106
LOC116917684	216	78	54	26	28	99	172	179	116	968	7	11	126	52	153	23	234	606	7	32	22	45	14	33	57	13	46	269	13	126	36	28	70	127	237	6	643	16	32	53	194	16	140	270	80	801	22	3	71
LOC116917685	81	90	18	9	63	24	57	73	11	426	1	12	93	9	40	0	90	245	2	29	5	31	6	48	10	0	2	133	7	67	34	10	72	7	73	0	270	14	50	79	61	2	28	119	10	363	20	1	97
LOC116917686	3296	3133	1377	639	1040	1919	7755	14380	4106	37645	150	240	4885	1293	5534	816	14643	27561	505	1065	338	1352	390	1138	2502	487	1020	8797	516	2986	1627	1193	2238	5030	17081	327	30998	576	1429	1510	7593	404	5655	16695	2381	36243	669	264	1806
LOC116917687	222	102	46	10	40	73	248	250	102	1093	8	11	130	38	128	21	189	525	7	20	6	20	11	15	56	19	16	170	16	88	36	15	53	132	240	7	587	19	45	38	162	3	128	320	48	763	9	7	70
LOC116917688	149	81	42	8	13	44	48	75	48	508	4	2	109	29	67	24	73	308	26	9	12	22	15	15	29	10	10	148	3	82	24	16	46	25	67	4	267	10	32	30	82	6	95	75	36	366	6	4	88
LOC116917689	2	8	4	2	1	0	2	5	0	24	3	1	18	0	5	0	3	30	0	2	1	12	2	14	0	0	1	32	1	10	9	5	2	2	14	0	43	5	20	1	6	0	4	10	3	49	0	0	7
LOC116917690	339	338	117	17	1455	62	139	442	51	2960	5	7	1714	11	279	35	1230	3281	15	67	9	516	22	415	101	3	23	1171	32	120	111	165	1898	53	1194	2	3575	65	253	1486	300	12	487	2011	110	4724	22	13	540
LOC116917691	263	279	101	9	97	75	173	277	56	1330	0	5	435	15	250	13	546	1264	12	68	5	140	23	130	112	5	22	517	22	167	132	121	247	84	406	3	1182	39	111	185	279	9	265	577	79	1544	31	9	220
LOC116917692	110	59	18	4	50	77	211	259	67	855	4	5	158	30	116	21	346	680	5	21	6	50	11	28	38	5	20	184	7	50	26	19	111	83	213	2	511	9	32	84	106	7	116	348	40	742	10	6	62
LOC116917693	23	7	5	2	18	14	19	7	19	114	2	2	11	6	20	3	23	67	6	2	1	18	1	10	2	4	11	55	9	13	3	2	8	19	15	3	72	3	8	9	18	4	8	19	15	84	11	1	12
LOC116917694	28	6	2	2	2	14	46	38	9	147	2	0	12	1	9	1	37	62	1	3	0	1	1	1	1	0	0	8	1	2	0	3	4	12	71	0	93	0	1	2	22	0	24	66	7	122	0	3	5
LOC116917695	2392	2067	1126	361	818	1502	1457	2880	1479	14082	228	239	1897	651	1421	221	2500	7157	317	1087	306	618	325	668	633	215	256	4425	419	2355	871	379	885	1117	2198	40	8264	478	1153	777	3646	290	1220	1959	638	10161	580	248	1751
LOC116917696	10	4	4	0	0	7	4	6	2	37	0	3	11	0	3	0	6	23	2	1	3	4	2	3	0	0	3	18	1	6	6	1	0	0	2	1	17	3	8	4	7	1	2	3	2	30	3	2	6
LOC116917697	710	220	60	27	44	272	430	574	260	2597	6	30	321	123	368	48	623	1519	29	63	25	61	26	43	131	34	64	476	31	215	72	51	103	234	445	11	1162	32	64	85	514	27	250	661	130	1763	32	32	106
LOC116917698	4	0	3	0	4	2	0	0	1	14	1	0	0	0	0	0	3	4	0	0	1	0	0	2	0	0	3	6	1	3	1	1	3	1	4	0	14	1	3	4	0	0	1	6	1	16	1	3	3
LOC116917699	5	2	2	0	3	3	5	4	3	27	1	0	4	1	2	3	6	17	0	5	1	2	2	4	0	0	3	17	1	8	3	3	10	7	7	2	41	1	6	6	1	1	10	8	10	43	8	0	3
LOC116917700	2	3	2	0	0	0	1	0	0	8	0	0	0	0	1	0	0	1	0	0	0	1	0	0	1	0	0	2	0	4	0	0	0	1	3	0	8	0	0	0	0	0	0	0	0	0	0	0	1
LOC116917701	558	551	223	87	245	416	617	1194	770	4661	42	50	697	290	739	131	1027	2976	84	198	101	194	74	199	375	178	150	1553	67	503	170	127	388	633	909	68	2865	106	235	273	969	44	665	1050	288	3630	104	40	356
LOC116917702	295	190	99	35	120	148	396	549	186	2018	7	12	364	70	345	28	795	1621	13	69	15	98	32	70	113	11	59	480	31	204	68	45	146	147	570	9	1220	44	123	181	336	20	339	854	133	2030	40	30	191
LOC116917705	44	29	19	8	8	21	44	34	29	236	9	1	23	17	31	2	64	147	4	7	4	7	2	11	15	5	3	58	9	31	8	4	17	32	49	2	152	3	11	6	43	4	42	81	11	201	2	0	19
LOC116917706	20	12	16	0	6	10	7	4	6	81	0	2	5	1	2	0	5	15	4	6	0	0	1	2	1	1	0	15	2	13	5	0	4	3	13	3	43	6	14	0	9	0	7	8	2	46	1	0	8
LOC116917707	33	6	5	0	0	9	25	45	7	130	1	0	20	4	13	1	27	66	0	3	1	3	1	0	5	2	2	17	0	10	4	2	1	11	24	0	52	1	6	5	9	0	22	63	1	107	0	2	6
LOC116917708	572	320	165	41	123	199	262	285	236	2203	31	23	372	173	345	78	333	1355	106	161	29	132	45	88	138	81	137	917	81	481	144	95	171	304	393	51	1720	63	139	153	473	26	270	523	182	1829	65	41	313
LOC116917711	94	110	119	19	52	101	84	72	112	763	18	5	90	32	86	36	243	510	30	78	10	34	15	56	57	15	1	296	28	142	73	40	60	115	143	10	611	22	72	54	116	20	204	156	76	720	20	19	129
LOC116917712	488	266	86	46	73	233	598	738	396	2924	24	19	469	163	731	102	899	2407	41	83	37	133	60	70	268	58	187	937	42	327	145	137	194	430	943	54	2272	38	110	151	517	46	634	1015	346	2857	38	38	183
LOC116917715	19	17	5	0	6	12	12	8	10	89	2	0	16	5	11	1	16	51	2	4	0	6	0	2	6	1	3	24	0	15	5	3	11	12	15	1	62	0	3	3	15	1	9	21	6	58	0	3	13
LOC116917716	23	122	0	1	0	499	250	225	77	1197	0	1	7	11	11	8	300	338	17	3	0	0	2	4	211	6	0	243	0	59	0	0	3	163	260	3	488	3	2	11	40	0	90	450	84	680	5	2	7
LOC116917717	60	39	27	2	8	35	39	65	31	306	2	5	68	16	33	7	85	216	6	10	5	28	6	16	19	6	18	114	3	45	31	14	45	34	66	4	242	7	29	24	71	5	51	115	29	331	4	8	31
LOC116917718	36	27	22	4	32	15	32	42	14	224	1	0	41	4	22	4	78	150	1	11	8	8	2	8	13	0	1	52	6	14	13	5	40	10	45	0	133	4	7	37	28	1	25	72	7	181	8	1	38
LOC116917719	35	17	11	2	3	59	204	108	24	463	0	0	53	19	12	3	95	182	1	4	14	2	3	1	7	6	5	43	3	3	2	4	6	112	55	1	186	0	0	4	54	3	25	122	5	213	6	7	5
LOC116917722	30	10	8	0	10	7	12	14	27	118	0	7	14	9	14	4	21	69	2	9	9	9	0	1	7	3	11	51	5	11	7	4	2	11	16	0	56	1	11	7	22	3	22	26	5	97	2	3	10
LOC116917723	43	10	2	5	3	105	97	91	27	383	4	1	23	27	29	3	64	151	2	11	4	2	0	2	15	10	7	53	10	20	8	3	4	66	68	7	186	1	12	8	54	1	24	93	7	200	3	3	12
LOC116917724	57	23	21	2	9	74	56	46	40	328	3	3	38	17	36	6	60	163	4	15	4	6	5	10	16	5	2	67	5	30	7	6	14	33	52	2	149	3	15	12	52	2	44	68	14	210	8	6	23
LOC116917725	449	278	204	70	91	242	390	353	437	2514	67	54	368	186	363	106	467	1611	93	153	69	97	43	77	209	151	83	975	79	273	156	70	153	510	449	59	1749	49	173	116	428	67	422	539	135	1929	61	44	263
LOC116917727	2	0	1	0	0	0	5	1	0	9	0	0	0	1	0	0	1	2	0	0	2	0	0	1	0	0	1	4	0	0	2	0	5	1	3	0	11	0	0	0	2	0	0	2	3	7	0	0	2
LOC116917728	74	68	20	8	33	72	97	135	58	565	9	3	121	9	94	9	145	390	11	17	8	33	6	28	31	3	25	162	15	48	29	21	85	49	94	4	345	12	36	56	33	8	81	199	31	456	8	15	58
LOC116917733	92	70	32	5	36	56	112	154	28	585	5	3	129	15	81	2	146	381	4	11	0	17	4	18	23	2	3	82	10	53	32	24	54	43	135	0	351	8	33	51	118	0	92	277	13	592	9	5	86
LOC116917734	98	47	29	5	29	87	155	191	99	740	16	10	118	58	94	13	178	487	15	21	7	32	12	19	34	18	32	190	21	74	29	20	56	112	130	15	457	11	36	57	110	7	79	208	40	548	24	18	56
LOC116917735	68	43	24	0	48	25	69	74	28	379	4	6	82	12	51	6	82	243	11	21	3	21	6	21	15	2	22	122	5	55	41	14	57	34	74	6	286	7	33	32	71	1	36	127	18	325	7	6	66
LOC116917737	1174	486	170	75	266	1403	3530	4110	1359	12573	39	52	1366	425	2688	243	4050	8863	85	189	102	255	63	155	927	198	204	2178	99	385	287	213	410	1864	5398	70	8726	99	201	341	2158	90	2813	7702	544	13948	137	57	324
LOC116917743	0	1	1	0	0	0	0	0	3	5	0	0	0	0	3	0	1	4	0	0	0	0	0	0	0	0	0	0	0	0	0	1	0	0	0	0	1	0	0	0	0	0	1	2	2	5	0	3	0
LOC116917746	0	0	0	0	0	0	0	3	1	4	0	0	0	0	0	1	0	1	0	0	0	0	0	0	0	0	0	0	0	0	0	0	0	0	1	0	1	0	0	0	0	0	3	1	0	4	0	1	0
LOC116917749	430	360	168	30	174	242	456	782	291	2933	16	28	484	80	388	55	857	1908	42	120	50	151	35	113	156	25	53	745	52	218	153	95	193	164	605	30	1510	65	179	173	497	36	359	906	151	2366	67	42	298
LOC116917750	59	40	28	1	8	20	62	44	59	321	8	9	42	10	36	8	83	196	6	28	11	25	6	10	8	3	10	107	13	47	18	7	28	34	54	6	207	19	28	13	74	11	28	50	27	250	18	8	39
LOC116917753	4	4	1	0	0	2	2	3	2	18	0	0	3	2	4	0	1	10	0	0	4	0	1	4	0	0	0	9	0	3	0	0	0	0	4	0	7	0	0	1	4	0	0	9	0	14	1	2	5
LOC116917755	92	57	21	12	4	28	29	39	41	323	0	2	64	30	67	20	81	264	11	13	3	20	5	8	27	23	34	144	2	82	38	19	23	34	66	16	280	0	17	12	50	4	45	64	36	228	0	1	54
LOC116917760	71	43	28	4	39	29	84	135	37	470	1	2	80	8	62	5	190	348	12	15	2	30	8	20	9	1	13	110	9	32	8	19	32	44	112	2	258	3	12	32	80	2	58	208	24	419	12	8	31
LOC116917761	127	120	60	29	19	61	72	79	97	664	11	8	93	63	108	21	102	406	21	41	13	32	12	19	43	12	24	217	23	76	61	44	50	148	109	21	532	9	53	30	94	12	97	131	53	479	28	27	91
LOC116917762	338	118	38	5	15	71	48	458	5	1096	7	0	2	51	0	6	263	329	13	98	6	2	3	5	50	0	12	189	19	90	121	83	51	158	263	2	787	6	50	7	62	8	5	350	98	586	63	4	15
LOC116917763	10	7	2	0	0	2	7	6	4	38	0	1	11	1	8	1	13	35	0	3	0	6	0	1	4	0	1	15	0	4	3	0	7	0	14	0	28	2	3	0	7	1	11	25	1	50	0	0	4
LOC116917764	126	98	43	6	57	44	124	178	38	714	4	2	161	9	115	8	245	544	3	27	2	28	4	31	21	2	10	128	7	48	25	23	66	36	169	2	376	16	27	81	110	4	61	328	18	645	8	1	76
LOC116917765	36	54	34	6	14	24	51	30	24	273	16	5	32	19	57	9	41	179	17	28	16	15	8	22	23	21	14	164	15	54	35	16	20	60	72	8	280	10	24	13	60	5	46	70	28	256	9	17	34
LOC116917766	127	117	96	11	96	22	15	40	5	529	16	21	143	22	19	12	5	238	22	68	10	64	16	73	13	1	2	269	37	100	73	25	93	16	70	1	415	45	98	82	78	12	23	62	7	407	51	30	149
LOC116917767	8	4	5	10	14	1	16	14	12	84	1	1	17	5	24	5	15	68	5	2	0	4	2	6	8	5	14	46	1	7	1	1	11	4	21	3	49	1	4	8	5	0	16	27	4	65	0	0	1
LOC116917768	16	6	6	1	15	8	65	65	39	221	0	1	35	16	77	11	103	243	2	3	4	19	1	4	29	12	28	102	1	8	1	11	34	32	104	7	198	0	2	9	29	2	50	112	32	236	0	1	7
LOC116917769	1	3	0	0	0	0	8	7	1	20	0	0	6	0	6	1	9	22	0	2	0	0	0	0	2	0	0	4	0	0	0	1	7	1	27	0	36	0	1	2	2	0	16	31	0	52	0	2	3
LOC116917770	27	3	6	3	2	25	32	31	18	147	4	4	14	19	17	4	46	108	4	5	2	0	0	0	3	1	4	19	1	14	3	3	0	23	21	6	71	5	8	7	24	1	9	50	2	106	8	1	4
LOC116917772	134	37	43	6	17	32	29	52	39	389	11	3	52	30	40	5	43	184	16	32	4	10	7	7	28	14	11	129	11	57	19	13	12	60	39	10	221	5	29	6	61	6	37	36	30	210	9	2	61
LOC116917773	71	11	5	2	0	7	8	40	1	145	0	0	9	1	3	2	10	25	0	0	0	4	0	1	4	0	1	10	1	10	1	3	0	4	8	0	27	1	6	1	10	0	3	31	5	57	4	1	10
LOC116917774	321	206	70	12	32	358	247	280	132	1658	5	11	191	37	98	36	498	876	18	44	7	26	7	23	134	4	16	279	9	137	27	18	58	151	549	15	964	12	52	46	117	7	227	788	93	1342	27	19	159
LOC116917776	96	40	23	8	20	52	127	197	164	727	7	3	113	28	281	23	166	621	10	25	5	25	7	17	43	11	20	163	8	46	31	10	51	85	441	9	681	9	47	29	92	10	269	313	59	828	1	9	59
LOC116917777	238	129	117	30	45	118	298	337	210	1522	31	14	197	75	225	30	479	1051	31	82	11	58	29	39	63	36	38	387	48	196	79	40	62	203	265	10	903	44	108	81	232	20	167	403	133	1188	53	19	118
LOC116917779	172	119	47	24	70	70	190	233	111	1036	19	16	173	51	158	27	256	700	30	64	20	85	20	39	68	37	60	423	17	120	58	33	84	147	205	21	685	18	56	75	190	37	104	411	64	955	12	16	99
LOC116917780	6	3	0	2	0	0	6	24	18	59	0	0	8	0	16	1	47	72	0	0	0	3	2	1	8	7	11	32	0	0	2	4	6	14	16	5	47	0	1	4	10	0	15	25	18	73	1	0	1
LOC116917782	12	1	4	0	2	3	11	3	3	39	0	0	8	4	0	3	13	28	2	2	0	1	0	0	0	0	1	6	0	8	0	3	3	5	4	0	23	3	4	1	12	0	0	9	1	30	0	0	15
LOC116917783	153	103	54	19	58	102	152	190	126	957	10	8	131	61	135	34	233	612	26	47	21	57	20	32	68	31	36	338	25	119	52	38	66	99	168	18	585	21	59	67	217	13	138	342	69	926	16	16	87
LOC116917784	2	1	1	0	0	0	3	1	2	10	0	2	0	0	0	1	1	4	1	1	0	0	0	0	0	0	2	4	0	3	2	0	1	0	6	0	12	1	1	0	7	0	0	3	0	12	0	0	8
LOC116917792	47	36	32	13	21	47	64	71	33	364	2	2	78	42	77	23	87	311	10	20	4	31	9	13	27	29	66	209	11	64	25	26	34	61	74	38	333	6	17	33	69	11	48	183	49	416	5	11	34
LOC116917793	14	5	0	0	0	0	3	2	0	24	0	0	4	0	1	0	2	7	0	1	0	2	0	0	0	0	0	3	0	3	1	0	1	1	6	0	12	4	3	0	3	0	1	2	0	13	0	1	7
LOC116917795	477	376	201	40	92	179	326	379	229	2299	26	19	395	124	271	61	336	1232	52	119	40	104	37	57	133	33	60	635	50	435	186	104	161	298	431	18	1683	58	179	95	494	24	359	474	146	1829	45	52	324
LOC116917798	143	109	75	31	43	110	169	162	332	1174	25	25	159	82	252	60	233	836	43	76	24	101	26	47	92	47	74	530	35	117	63	43	109	173	152	42	734	33	89	67	62	32	198	232	92	805	61	32	118
LOC116917799	8	2	0	0	5	3	10	21	11	60	0	2	26	4	20	4	26	82	0	2	2	5	1	1	3	0	14	28	0	6	4	4	15	8	23	3	63	1	1	8	19	0	13	33	10	85	0	7	8
LOC116917800	2	2	0	0	0	0	1	1	4	10	0	0	1	1	0	0	0	2	0	2	0	0	0	1	2	1	1	7	0	1	1	1	4	4	1	0	12	0	2	0	2	0	0	3	2	9	0	0	1
LOC116917801	286	291	67	19	53	158	400	481	374	2129	12	15	380	93	413	38	625	1576	45	61	22	111	20	67	126	30	86	568	31	186	74	66	142	240	413	37	1189	27	96	147	282	20	275	777	157	1781	36	42	129
LOC116917802	53	41	7	0	12	18	56	101	24	312	2	0	59	12	65	2	120	260	2	9	0	17	3	12	13	6	6	68	2	38	17	10	31	41	102	4	245	4	5	20	67	2	50	127	13	288	3	5	38
LOC116917804	220	139	89	14	36	102	129	148	135	1012	22	11	110	59	129	36	164	531	28	57	3	40	14	28	48	40	33	291	22	148	68	23	74	166	179	26	706	24	58	31	151	17	123	224	65	693	12	24	136
LOC116917806	60	44	22	9	30	44	129	168	78	584	5	3	105	21	123	15	228	500	9	15	1	28	6	17	28	8	13	125	9	31	11	15	36	72	133	4	311	10	9	43	90	5	56	245	46	504	4	8	23
LOC116917807	103	75	56	8	34	46	93	104	87	606	12	15	76	27	90	13	140	373	20	42	16	27	11	40	40	15	19	230	26	97	61	25	23	62	118	3	415	18	41	37	84	5	82	133	31	431	30	11	62
LOC116917808	4	1	2	0	0	0	0	0	0	7	0	0	4	0	0	0	0	4	0	1	1	1	0	2	0	0	0	5	0	1	0	0	2	0	3	0	6	0	2	0	0	0	0	0	0	2	0	0	2
LOC116917809	1	7	2	0	0	2	0	1	2	15	0	0	3	0	1	0	2	6	0	0	0	1	0	0	0	0	0	1	0	2	7	0	0	1	2	0	12	0	2	2	3	0	1	2	2	12	0	0	2
LOC116917810	99	89	36	9	28	46	82	84	44	517	10	9	118	18	76	23	149	403	8	35	5	52	17	21	38	3	8	187	6	74	40	36	55	28	122	2	363	19	38	44	114	9	80	194	54	552	19	9	84
LOC116917812	95	78	46	17	55	62	67	123	52	595	9	7	138	17	59	10	150	390	11	35	2	42	9	33	26	6	20	184	17	69	36	15	82	41	96	3	359	18	40	67	126	10	54	225	45	585	6	7	73
LOC116917815	31	18	13	3	8	9	22	21	21	146	6	0	32	16	24	5	26	109	2	6	4	4	2	11	17	6	11	63	7	30	8	3	15	23	26	2	114	0	3	12	35	2	14	23	14	103	7	6	22
LOC116917817	451	266	217	66	132	178	232	268	230	2040	24	31	310	146	312	107	401	1331	78	129	34	141	74	120	146	49	134	905	85	347	193	145	151	204	393	50	1568	70	146	183	366	53	325	447	240	1830	91	64	275
LOC116917818	333	291	210	78	135	154	216	179	201	1797	40	42	306	141	310	77	212	1128	85	154	23	134	41	105	148	92	159	941	77	393	178	96	200	275	320	64	1603	52	184	137	393	50	319	410	249	1794	60	53	285
LOC116917819	1059	504	173	63	96	475	746	854	396	4366	21	36	829	244	568	82	1100	2880	59	171	37	167	85	134	267	52	177	1149	53	638	188	141	306	497	945	22	2790	89	215	219	802	85	739	1148	297	3594	74	69	469
LOC116917820	38	12	14	3	2	12	22	44	27	174	4	1	38	8	47	6	58	162	4	12	6	8	2	3	16	16	17	84	7	16	5	3	12	26	37	8	114	4	9	3	24	0	24	50	40	154	5	3	14
LOC116917825	32	30	11	2	19	18	36	50	16	214	2	2	47	6	28	2	58	145	2	7	4	16	4	13	7	2	10	65	2	16	17	6	25	13	57	0	136	6	15	22	31	1	35	86	9	205	2	4	50
LOC116917829	33	35	9	0	27	19	35	28	11	197	0	0	62	9	23	4	31	129	0	3	3	6	2	4	4	2	6	30	1	10	4	2	33	22	35	0	107	0	6	17	32	1	23	76	9	164	5	0	20
LOC116917830	0	2	0	0	0	4	6	2	4	18	0	0	3	0	5	0	11	19	0	0	0	3	0	0	0	0	1	4	0	0	1	1	0	0	6	0	8	3	0	0	3	0	2	1	3	12	0	0	1
LOC116917831	635	270	76	35	31	142	117	378	73	1757	5	4	360	53	141	13	161	737	27	77	16	51	12	39	90	3	31	346	18	75	121	111	134	131	199	7	796	8	65	42	142	10	171	312	56	806	52	20	143
LOC116917832	341	151	127	13	34	132	254	223	201	1476	10	7	163	99	186	36	223	724	60	65	21	49	16	39	79	47	46	422	23	210	78	51	47	340	259	29	1037	26	86	66	227	18	189	376	86	1074	23	19	130
LOC116917833	35	12	5	1	18	17	59	125	29	301	0	1	52	6	56	4	105	224	0	4	2	13	4	7	7	3	11	51	4	4	3	7	30	20	109	7	184	3	7	34	64	2	37	226	20	393	1	1	19
LOC116917834	0	2	0	0	2	0	1	2	0	7	0	0	0	1	0	0	2	3	0	2	0	0	1	0	0	0	0	3	0	0	0	0	0	0	0	0	0	0	1	0	1	1	0	3	0	6	0	0	0
LOC116917835	95	82	51	18	35	102	171	199	146	899	9	9	156	49	145	38	422	828	19	24	21	38	7	42	54	19	40	264	15	63	27	19	56	161	184	24	549	20	37	61	148	4	236	320	86	912	20	12	70
LOC116917836	167	128	67	32	64	107	139	206	101	1011	16	14	165	77	154	31	258	715	33	54	31	78	33	45	63	15	94	446	30	151	64	45	75	106	169	37	677	19	53	53	196	15	156	311	111	914	40	22	82
LOC116917837	8	0	0	0	1	0	0	2	0	11	0	0	3	0	0	0	2	5	0	0	0	0	0	2	0	0	0	2	0	1	0	0	0	0	0	0	1	0	2	0	3	0	0	1	0	6	0	0	1
LOC116917838	301	85	0	2	10	19	187	485	17	1106	1	4	186	16	30	5	26	268	2	4	4	8	0	9	10	0	3	40	1	2	7	10	27	66	104	0	217	1	4	13	169	4	49	416	0	656	3	6	61
LOC116917839	10	3	4	0	2	15	3	6	3	46	1	2	3	2	0	0	2	10	0	2	0	2	0	1	0	0	0	5	1	13	0	1	9	13	2	1	40	2	1	0	2	0	5	2	0	12	1	1	6
LOC116917840	216	154	5	141	185	151	363	351	253	1819	4	0	657	376	544	114	565	2260	87	27	0	403	69	163	310	266	367	1692	5	274	61	302	366	486	446	194	2134	12	30	270	418	117	490	738	361	2436	5	27	22
LOC116917841	6	2	0	0	3	0	1	3	3	18	0	0	2	0	3	0	3	8	0	4	1	0	0	0	0	0	0	5	0	3	2	0	0	5	5	1	16	0	1	1	3	0	7	6	0	18	0	1	6
LOC116917842	132	93	28	15	53	71	206	291	146	1035	6	4	227	34	260	35	593	1159	23	28	17	99	19	38	73	15	70	382	11	82	36	49	96	141	302	18	735	10	49	105	210	14	225	507	102	1222	17	10	66
LOC116917843	42	2	8	1	11	1	13	5	1	84	2	0	24	5	4	0	0	35	0	6	1	3	2	2	3	2	3	22	0	7	0	0	8	1	22	0	38	1	5	8	15	0	8	36	0	73	0	1	19
LOC116917845	1	0	0	0	0	0	0	0	1	2	0	0	4	0	2	0	3	9	0	1	0	4	0	0	2	0	0	7	0	1	2	2	0	0	1	0	6	0	0	2	0	0	1	2	0	5	0	0	2
LOC116917847	165	75	27	13	38	76	128	232	161	915	6	9	150	63	157	14	348	747	16	41	17	30	13	28	72	14	53	284	23	103	50	34	49	111	197	7	574	16	38	48	191	18	153	255	80	799	10	7	65
LOC116917850	3	2	2	0	2	0	1	2	0	12	0	1	2	0	3	0	5	11	0	0	0	3	0	0	0	0	1	4	1	1	4	2	0	2	1	0	11	2	7	2	6	0	2	4	2	25	0	1	7
LOC116917851	1	0	0	0	0	0	2	0	1	4	0	0	0	0	1	0	0	1	0	0	2	0	0	0	0	0	0	2	0	0	0	0	0	0	0	0	0	0	0	0	0	0	0	0	0	0	0	0	0
LOC116917852	20	8	4	0	10	5	17	42	7	113	0	0	20	6	21	0	67	114	1	4	0	0	0	3	4	0	2	14	1	7	1	1	4	10	66	1	91	3	5	5	9	0	9	90	6	127	3	1	3
LOC116917853	73	53	47	26	28	62	84	87	73	533	9	16	73	30	110	22	103	363	20	26	12	22	7	36	29	19	36	207	17	64	47	27	37	102	120	8	422	13	33	30	153	10	80	140	38	497	8	8	48
LOC116917854	50	30	17	0	43	19	63	56	8	286	3	0	43	3	22	1	44	116	1	7	6	4	3	5	5	3	0	34	4	16	6	5	35	14	49	0	129	6	12	17	30	2	22	87	2	178	0	6	21
LOC116917855	1234	280	132	11	27	478	782	951	274	4169	3	8	706	171	414	15	619	1936	21	13	20	29	10	20	168	8	22	311	3	291	34	22	134	486	849	7	1826	10	29	77	646	27	416	1079	85	2369	13	15	179
LOC116917856	458	261	76	15	58	136	761	919	213	2897	7	5	399	41	380	45	858	1735	11	63	10	87	20	54	127	6	20	398	30	194	51	52	130	166	623	1	1247	36	106	112	270	14	440	1062	108	2148	4	22	177
LOC116917857	278	268	98	35	74	144	192	452	207	1748	33	24	386	160	298	32	399	1332	49	84	19	82	46	46	140	100	55	621	37	276	98	71	114	288	329	27	1240	41	88	110	436	52	224	612	139	1702	66	35	167
LOC116917858	19	8	4	0	2	7	18	26	7	91	3	0	8	3	5	1	14	34	2	1	0	3	1	2	5	4	0	18	3	11	0	3	8	8	28	0	61	0	4	5	13	1	9	28	4	64	1	2	11
LOC116917859	50	35	11	4	14	19	47	38	63	281	2	2	31	33	57	7	80	212	8	13	3	17	5	15	23	7	15	106	2	46	13	7	23	56	52	16	215	4	5	18	37	2	34	46	35	181	8	4	16
LOC116917861	12	9	8	2	1	4	23	24	9	92	0	0	9	0	7	3	20	39	0	3	1	3	2	5	3	0	4	21	0	1	1	1	7	8	12	1	31	3	2	9	11	0	6	39	1	71	0	0	8
LOC116917862	114	66	28	58	53	104	119	155	203	900	6	10	137	99	236	51	183	722	27	36	6	117	25	46	112	138	196	703	8	126	48	48	96	195	177	67	765	15	38	69	150	28	145	253	156	854	9	28	41
LOC116917863	1191	798	130	19	257	184	940	2304	295	6118	3	8	1889	14	1315	68	4425	7722	9	47	10	237	39	184	410	8	40	984	23	226	97	159	553	197	3286	4	4545	67	206	631	1526	14	1915	5274	303	9936	40	9	464
LOC116917864	96	120	74	8	31	71	73	80	63	616	7	6	72	39	57	20	97	298	28	56	20	29	10	27	42	8	8	228	22	89	61	34	48	49	76	4	383	16	58	55	67	7	66	108	22	399	19	2	105
LOC116917865	468	186	114	26	158	188	425	441	163	2169	86	21	479	129	166	43	250	1174	18	107	21	126	34	114	74	15	21	530	62	189	84	41	142	202	279	4	1003	55	150	154	560	29	218	825	50	2041	42	32	340
LOC116917869	393	237	196	15	255	32	92	47	20	1287	23	21	185	6	26	10	87	358	21	109	14	101	16	100	8	4	0	373	44	191	110	51	136	16	278	1	827	68	176	208	165	17	48	185	19	886	38	19	333
LOC116917870	0	0	1	1	1	0	4	2	1	10	0	0	1	1	2	3	4	11	0	0	0	0	0	0	0	2	0	2	0	0	14	0	0	0	2	1	17	1	0	0	7	1	2	4	2	17	0	0	0
LOC116917871	10	1	3	0	17	0	1	1	1	34	0	0	1	1	0	0	0	2	2	0	0	1	0	3	1	0	1	8	0	1	1	4	26	2	5	0	39	1	2	9	2	0	0	0	0	14	0	0	8
LOC116917873	47	31	12	12	5	10	22	22	35	196	3	0	42	17	36	3	78	179	3	14	8	14	4	8	20	4	12	87	1	21	23	24	19	31	45	8	172	1	14	13	50	8	30	75	27	218	9	4	15
LOC116917875	148	116	67	23	46	49	110	148	71	778	7	7	113	56	90	19	173	465	16	35	14	27	21	23	56	26	42	260	23	106	38	29	51	113	130	8	498	17	62	70	172	21	105	241	44	732	24	23	87
LOC116917878	7	8	4	0	2	6	5	3	9	44	0	0	4	3	6	0	7	20	2	1	2	2	0	1	2	0	1	11	0	6	0	1	0	5	8	0	20	2	3	4	4	4	12	9	0	38	0	0	5
LOC116917879	36	27	1	1	0	8	16	16	5	110	4	1	12	3	7	2	3	32	3	2	0	6	2	1	0	5	2	21	2	21	9	2	5	6	9	1	55	3	9	5	17	3	4	21	1	63	12	1	8
LOC116917883	439	231	166	21	105	168	311	356	248	2045	22	20	387	75	325	29	434	1292	24	71	38	86	16	87	122	17	18	479	38	240	120	67	236	255	433	7	1396	22	154	178	312	19	366	572	65	1688	36	33	341
LOC116917884	273	138	56	55	58	141	425	495	224	1865	10	21	314	102	413	42	670	1572	25	47	11	107	28	58	142	20	85	523	35	166	80	80	106	192	509	18	1186	20	61	117	350	17	274	657	148	1644	19	26	83
LOC116917887	28	15	3	1	2	21	64	59	75	268	4	2	26	25	64	19	73	213	2	8	9	7	1	4	15	13	13	72	2	23	3	9	4	59	59	2	161	0	14	8	30	1	28	86	19	186	0	2	8
LOC116917890	691	433	130	66	92	275	658	1186	398	3929	24	25	683	90	713	64	1498	3097	25	113	48	197	49	122	230	25	90	899	61	298	135	115	246	262	1046	19	2182	76	191	165	487	50	643	1679	202	3493	46	36	284
LOC116917891	319	123	72	22	51	99	373	389	188	1636	11	22	201	83	272	26	509	1124	33	61	29	57	32	58	71	26	50	417	19	133	59	54	99	287	405	19	1075	33	69	80	311	20	200	572	91	1376	25	24	105
[truncated: 15,293 more rows]
[truncated: 26 more columns]

## Sheet: LRII36_01
Genotype	LRII36_01
Day	Day 1			Day 2			Day 3			Day 1			Day 2			Day 3				Day 1			Day 2			Day 3				Day 1			Day2			Day 3			Day 1			Day 2			Day 3				Day 1
Replica	R1	R2	R3	R1	R2	R3	R1	R2		R1	R2	R3	R1	R2	R3	R1	R2	R3		R1	R2	R3	R1	R2	R3	R1	R2	R3		R1	R2	R3	R1	R2	R3	R1	R2		R1	R2	R3	R1	R2	R3	R1	R2	R3		R1
Treatment	LRII36_01_Control_R1D1	LRII36_01_Control_R2D1	LRII36_01_Control_R3D1	LRII36_01_Control_R1D2	LRII36_01_Control_R2D2	LRII36_01_Control_R3D2	LRII36_01_Control_R1D3	LRII36_01_Contorl R2D3	total	LRII36_01_PET-PFOA_R1D1	LRII36_01_PET-PFOA_R2D1	LRII36_01_PET-PFOA_R3D1	LRII36_01_PET-PFOA_R1D2	LRII36_01_PET-PFOA_R2D2	LRII36_01_PET-PFOA_R3D2	LRII36_01_PET-PFOA_R1D3	LRII36_01_PET-PFOA_R2D3	LRII36_01_PET-PFOA_R3D3	total	LRII36_01_PET-PFOA-PFOS_R1D1	LRII36_01_PET-PFOA-PFOS_R2D1	LRII36_01_PET-PFOA-PFOS_R3D1	LRII36_01_PET-PFOA-PFOS_R1D2	LRII36_01_PET-PFOA-PFOS_R2D2	LRII36_01_PET-PFOA-PFOS_R3D2	LRII36_01_PET-PFOA-PFOS_R1D3	LRII36_01_PET-PFOA-PFOS_R2D3	LRII36_01_PET-PFOA-PFOS_R3D3	total	LRII36_01_PET_R1D1	LRII36_01_PET_R2D1	LRII36_01_PET_R3D1	LRII36_01_PET_R1D2	LRII36_01_PET_R2D2	LRII36_01_PET_R3D2	LRII36_01PET_R1D3	LRII36_01PET_R2D3	total	LRII36_01_PET-PFOS_R1D1	LRII36_01PET-PFOS_R2D1	LRII36_01PET-PFOS_R3D1	LRII36_01PET-PFOS_R1D2	LRII36_01PET-PFOS_R2D2	LRII36_01PET-PFOS_R3D2	LRII36_01PET-PFOS_R1D3	LRII36_01PET-PFOS_R2D2	LRII36_01PET-PFOS_R3D3	total	LRII36_01_PFOA_R1D1
LOC116915296	91	206	338	290	727	710	636	96	3094	66	889	162	616	131	768	452	241	1084	4409	114	422	257	603	4145	133	189	621	4103	10587	153	51	54	555	54	415	518	29	1829	379	176	477	258	73	261	633	6356	624	9237	46
LOC116915298	1	1	2	0	0	3	1	0	8	1	2	0	0	0	4	2	2	4	15	1	2	2	0	4	0	0	1	21	31	0	1	0	2	0	1	1	0	5	0	1	3	0	0	0	1	20	1	26	2
LOC116915299	1	0	0	0	5	0	1	0	7	0	1	3	1	0	0	0	2	2	9	8	0	0	2	4	0	0	14	17	45	1	1	0	0	0	0	12	0	14	145	6	0	0	1	15	14	4	0	185	0
LOC116915300	33	123	142	35	105	124	358	19	939	120	301	183	342	14	194	177	64	303	1698	161	153	60	118	1260	36	32	138	1067	3025	56	39	11	185	22	165	247	4	729	116	358	346	90	16	48	186	1475	132	2767	30
LOC116915308	158	149	268	224	685	473	1335	63	3355	80	1105	189	1664	92	453	199	120	451	4353	115	525	236	854	4200	74	16	278	2091	8389	126	48	54	447	81	836	304	7	1903	452	337	696	230	72	145	322	2267	262	4783	61
LOC116915310	42	360	178	748	965	772	1111	275	4451	31	1176	144	430	836	1071	1283	480	2167	7618	143	247	105	464	4372	635	826	1682	10067	18541	129	69	51	999	460	168	1366	420	3662	435	227	472	680	189	745	1297	16093	1534	21672	40
LOC116915312	6	7	3	0	4	4	6	1	31	8	10	11	5	0	8	1	0	3	46	3	3	5	2	22	1	1	3	7	47	9	2	0	5	0	4	2	0	22	4	12	10	1	3	3	2	25	4	64	0
LOC116915322	18	29	77	34	176	289	234	13	870	33	112	129	197	23	275	120	70	260	1219	28	77	102	177	2335	21	6	260	2134	5140	57	12	14	229	12	109	250	15	698	247	54	145	31	47	197	238	2331	223	3513	6
LOC116915324	11	29	72	25	61	66	50	8	322	15	81	24	112	17	73	43	22	149	536	8	69	48	66	631	11	6	133	345	1317	42	22	8	81	3	43	84	2	285	93	22	99	26	4	33	86	545	146	1054	6
LOC116915326	2	2	1	2	10	15	24	0	56	0	14	0	27	3	6	7	1	9	67	0	13	1	16	64	1	0	4	56	155	2	0	4	7	0	5	17	0	35	8	9	8	2	2	8	10	58	4	109	2
LOC116915327	8	18	26	10	36	63	26	6	193	2	42	58	52	17	73	32	2	62	340	17	34	35	42	353	19	12	61	221	794	24	14	6	52	11	32	60	3	202	39	29	43	14	26	38	44	332	66	631	9
LOC116915328	41	77	158	79	50	69	81	25	580	42	174	128	162	70	114	175	33	231	1129	66	91	59	62	575	42	70	206	599	1770	73	85	54	102	67	125	128	7	641	99	130	155	150	67	64	146	1286	291	2388	23
LOC116915329	30	33	84	40	56	98	44	21	406	17	94	93	139	42	93	59	21	104	662	26	62	46	66	614	46	9	64	411	1344	85	22	30	121	32	92	67	8	457	75	62	150	72	73	60	54	670	79	1295	14
LOC116915330	28	126	202	142	276	367	144	31	1316	16	252	98	187	134	309	202	112	341	1651	36	187	117	227	2136	84	52	264	1899	5002	109	36	30	308	58	150	256	30	977	126	70	192	155	68	196	299	2876	374	4356	12
LOC116915331	0	9	22	1	25	50	9	1	117	0	49	52	75	1	104	1	3	18	303	8	33	39	42	366	0	0	10	36	534	17	0	0	45	1	14	14	0	91	31	12	55	5	16	20	2	42	5	188	3
LOC116915332	19	39	49	30	80	92	93	4	406	5	151	30	78	9	70	30	26	93	492	17	63	31	93	609	16	11	37	426	1303	10	5	7	83	12	64	43	3	227	41	36	62	37	5	23	50	457	27	738	8
LOC116915333	317	422	728	457	912	1578	426	206	5046	207	1495	1038	1051	526	1240	246	116	431	6350	219	789	864	1068	10110	494	20	150	2098	15812	438	200	242	1210	212	1061	298	19	3680	1073	488	1377	358	241	255	181	2757	376	7106	123
LOC116915334	37	99	92	90	197	169	249	18	951	19	300	60	209	62	142	114	38	250	1194	34	184	62	223	1168	56	40	108	647	2522	69	34	12	163	38	145	130	12	603	107	72	158	85	29	72	138	1015	169	1845	45
LOC116915335	33	86	163	46	135	200	149	37	849	22	256	123	223	49	210	88	64	238	1273	57	146	118	160	1517	69	14	125	1046	3252	83	41	18	161	28	114	109	7	561	144	98	200	89	18	71	134	1472	129	2355	11
LOC116915336	1	2	8	0	3	9	4	0	27	0	9	10	6	3	3	3	2	0	36	0	6	1	2	48	1	0	2	13	73	8	4	4	2	0	1	2	2	23	7	7	11	3	1	1	3	15	1	49	0
LOC116915338	23	53	115	73	85	149	155	29	682	34	159	166	265	88	148	85	36	236	1217	51	120	78	104	1029	50	54	260	1014	2760	86	38	24	215	60	220	202	26	871	106	98	125	79	133	208	134	1450	251	2584	30
LOC116915339	1	3	131	49	34	10	119	9	356	3	33	113	52	38	182	157	76	658	1312	0	35	64	35	682	14	15	797	2169	3811	85	16	11	195	20	117	497	12	953	129	11	12	98	374	491	449	2974	1060	5598	2
LOC116915340	20	85	167	135	931	1422	2101	26	4887	25	295	203	976	121	1613	887	487	2296	6903	56	224	238	989	9908	96	74	2535	15965	30085	185	35	6	1750	43	411	2362	36	4828	592	128	427	319	492	2306	2573	19473	2038	28348	8
LOC116915341	15	78	186	178	1012	1395	2134	27	5025	21	427	190	1052	115	1656	1145	520	2580	7706	62	254	271	947	10202	60	61	2179	12236	26272	170	40	11	1708	50	541	1855	32	4407	604	119	506	297	330	1243	1772	18103	1775	24749	7
LOC116915342	0	2	23	2	12	37	9	0	85	2	43	4	41	6	71	0	0	4	171	3	38	17	46	530	0	0	1	4	639	12	6	0	22	3	9	1	1	54	34	16	62	6	1	4	0	0	10	133	0
LOC116915343	2	5	16	5	2	24	1	0	55	4	20	7	50	3	36	2	1	7	130	2	21	14	13	152	1	0	3	38	244	9	1	0	12	0	10	10	0	42	21	12	25	0	4	5	2	20	4	93	0
LOC116915344	1	8	20	1	1	17	4	0	52	2	16	9	42	1	3	50	10	32	165	2	27	11	6	503	0	0	2	55	606	25	8	2	0	0	0	10	2	47	27	10	39	2	2	1	29	68	16	194	0
LOC116915345	2	0	8	0	5	3	4	0	22	3	10	2	2	3	10	12	1	10	53	2	2	0	3	166	1	0	4	31	209	1	1	2	6	0	1	6	0	17	0	2	3	3	0	6	20	46	4	84	0
LOC116915346	12	28	62	59	67	112	68	28	436	2	64	68	66	56	90	60	21	133	560	11	36	35	40	594	35	43	120	571	1485	45	22	19	106	31	63	76	11	373	46	42	63	81	77	101	86	857	174	1527	8
LOC116915347	1	7	45	2	3	25	4	0	87	2	13	8	107	5	26	72	6	30	269	5	42	20	18	1069	0	0	11	125	1290	42	15	1	18	0	3	47	0	126	53	13	47	7	2	5	59	69	50	305	0
LOC116915348	10	34	33	33	54	49	49	12	274	32	94	27	65	17	63	38	5	69	410	20	37	30	59	415	28	8	27	239	863	27	13	2	58	12	52	51	9	224	49	38	75	38	8	25	36	408	43	720	7
LOC116915349	32	61	112	58	118	177	184	19	761	33	139	132	117	27	142	99	41	185	915	47	78	62	134	1286	44	15	112	871	2649	84	28	13	149	25	77	151	8	535	138	65	147	42	46	90	125	1099	140	1892	10
LOC116915350	2	3	3	0	1	6	6	0	21	1	19	1	19	0	5	0	1	5	51	6	13	6	12	50	0	0	2	4	93	2	0	0	4	1	10	1	1	19	2	7	10	0	0	0	0	8	0	27	3
LOC116915351	2	22	15	28	61	44	118	19	309	0	73	15	34	60	98	79	26	155	540	6	21	8	32	297	24	33	154	682	1257	14	1	0	80	16	22	98	17	248	20	5	32	42	24	96	81	1226	135	1661	2
LOC116915352	16	13	14	7	86	55	137	6	334	4	76	10	84	1	40	13	16	78	322	7	49	14	81	530	7	2	38	336	1064	5	0	0	65	1	42	48	3	164	48	15	34	18	2	15	50	354	18	554	9
LOC116915353	9	7	11	16	39	22	68	1	173	2	38	2	41	4	24	15	9	28	163	6	24	6	48	195	5	4	12	93	393	1	5	2	24	3	25	24	0	84	17	13	23	19	0	2	25	116	8	223	6
LOC116915354	4	0	6	1	20	15	687	0	733	0	31	20	130	0	18	17	7	96	319	18	23	1	52	140	0	1	30	80	345	3	0	0	11	0	33	23	2	72	18	19	7	5	0	1	23	100	18	191	0
LOC116915355	1	0	1	0	3	3	0	0	8	0	0	8	1	0	0	0	3	4	16	4	2	1	0	15	0	1	3	10	36	1	0	0	0	0	1	3	2	7	14	3	0	0	0	3	2	12	0	34	2
LOC116915356	15	61	152	48	119	185	259	10	849	39	183	152	278	25	269	173	50	327	1496	42	126	99	151	1570	26	18	216	1170	3418	77	33	14	219	15	121	244	9	732	149	124	263	44	43	115	173	1620	219	2750	14
LOC116915357	0	0	1	2	3	2	1	0	9	0	1	2	1	0	2	1	0	2	9	0	0	2	2	26	0	0	3	6	39	0	0	0	0	0	1	1	0	2	2	0	0	0	0	2	0	19	2	25	0
LOC116915358	20	33	24	31	141	142	118	9	518	21	133	34	102	25	108	72	47	110	652	15	44	45	101	794	40	24	103	807	1973	20	1	12	107	20	47	101	8	316	56	33	65	60	7	85	149	1172	63	1690	6
LOC116915359	46	98	110	115	234	285	179	49	1116	6	253	92	153	61	200	134	73	299	1271	55	111	107	213	1558	91	55	198	1488	3876	50	24	28	180	72	141	196	21	712	124	57	162	86	45	119	274	2176	223	3266	22
LOC116915360	4	2	2	1	18	29	51	0	107	1	28	4	27	0	18	7	9	13	107	7	8	3	18	210	4	2	31	265	548	3	0	0	15	1	13	31	0	63	12	5	6	2	3	15	41	228	12	324	2
LOC116915362	59	100	234	75	138	237	146	26	1015	86	316	200	299	62	282	92	50	291	1678	86	167	189	182	1892	69	21	154	781	3541	146	78	47	207	44	182	199	8	911	205	154	306	72	44	91	155	1157	254	2438	10
LOC116915363	0	3	2	0	1	9	4	0	19	0	1	12	8	0	6	4	1	2	34	0	3	1	3	17	0	0	0	5	29	2	0	2	4	0	2	2	1	13	6	1	8	2	2	8	1	18	0	46	0
LOC116915364	39	45	129	53	156	201	273	17	913	44	235	91	210	46	237	122	59	244	1288	47	121	80	150	1628	42	21	222	1355	3666	96	33	32	205	33	103	246	14	762	166	105	189	87	80	150	224	1806	202	3009	12
LOC116915365	5	13	23	12	44	47	41	5	190	10	29	23	31	6	43	16	12	47	217	4	17	20	25	389	12	5	36	304	812	15	9	9	44	3	15	34	0	129	24	4	35	8	15	35	50	355	30	556	5
LOC116915366	11	29	61	35	78	105	147	4	470	14	159	32	107	15	101	77	49	148	702	22	97	32	90	677	11	11	63	379	1382	21	13	2	92	6	58	99	2	293	60	43	74	54	3	22	67	904	87	1314	7
LOC116915367	22	21	24	8	48	33	89	5	250	15	122	25	97	2	43	21	17	89	431	23	71	13	81	363	6	5	31	181	774	11	2	1	48	6	50	28	5	151	38	50	61	19	1	3	43	228	18	461	6
LOC116915368	1	0	0	0	2	2	0	0	5	1	1	0	1	0	2	2	2	0	9	0	0	1	2	5	0	3	2	13	26	2	1	0	2	0	0	1	0	6	1	2	4	0	0	1	1	14	1	24	0
LOC116915369	15	29	56	19	53	88	61	7	328	24	100	58	80	18	96	52	18	107	553	33	45	25	58	531	20	7	47	371	1137	28	20	6	66	19	39	64	1	243	37	38	80	38	23	47	65	515	72	915	17
LOC116915370	1	11	12	12	20	26	36	4	122	3	14	7	11	14	27	18	19	45	158	2	3	5	12	113	10	13	46	355	559	7	2	2	23	8	2	90	3	137	11	9	11	15	23	19	51	623	57	819	0
LOC116915371	164	190	222	178	968	696	1711	58	4187	73	1049	127	1028	98	659	370	284	990	4678	152	668	209	1071	6181	81	72	669	5948	15051	126	59	31	700	69	522	710	32	2249	489	291	476	279	57	465	1124	6631	530	10342	53
LOC116915374	3	12	19	11	42	37	46	1	171	8	29	29	33	4	39	31	13	56	242	6	32	19	44	326	13	2	35	245	722	18	6	7	25	3	18	41	1	119	38	32	46	14	5	15	36	316	17	519	0
LOC116915375	0	19	13	41	89	98	138	13	411	1	119	9	29	31	93	109	55	210	656	11	26	13	52	339	20	41	126	861	1489	7	1	2	69	26	7	140	17	269	29	5	30	53	8	91	155	1341	124	1836	0
LOC116915376	0	1	0	0	0	1	0	0	2	0	2	1	0	0	0	0	1	1	5	0	0	1	0	4	0	0	1	1	7	0	0	0	1	0	0	2	0	3	0	1	1	1	0	5	0	6	0	14	0
LOC116915377	16	34	73	34	99	143	233	18	650	17	106	76	198	48	143	94	42	226	950	20	86	43	109	1219	30	17	165	1287	2976	72	40	11	176	32	69	195	7	602	122	75	115	62	86	133	214	1435	174	2416	11
LOC116915378	10	25	51	24	94	120	121	18	463	4	94	41	90	19	83	42	25	102	500	16	67	42	81	1044	19	6	75	677	2027	25	10	4	90	11	62	106	5	313	90	32	89	34	9	43	104	749	77	1227	13
LOC116915379	14	50	142	107	474	344	723	34	1888	86	327	304	795	55	695	224	172	543	3201	64	227	123	392	4562	60	45	602	4722	10797	180	80	22	895	19	381	593	24	2194	364	316	629	192	31	419	414	6700	287	9352	17
LOC116915380	23	28	41	31	137	139	159	8	566	30	170	66	162	26	99	51	32	154	790	24	78	30	125	867	15	11	83	429	1662	27	10	10	120	18	136	121	1	443	64	73	120	39	19	41	88	663	99	1206	6
LOC116915381	14	16	13	24	228	206	600	4	1105	5	67	28	148	12	126	60	86	258	790	14	34	26	91	1378	19	24	286	2545	4417	11	1	10	225	8	66	533	11	865	76	12	43	41	16	182	243	2849	174	3636	9
LOC116915382	12	35	66	47	62	96	123	16	457	35	134	113	173	27	117	146	44	185	974	52	65	50	76	736	26	20	109	760	1894	40	22	18	96	16	81	120	18	411	61	94	135	45	7	66	114	1193	102	1817	13
LOC116915383	18	55	170	27	119	137	287	12	825	26	164	406	328	53	248	184	36	341	1786	42	85	82	88	1723	22	17	205	1022	3286	131	85	16	240	36	171	198	11	888	158	164	328	71	151	174	150	1303	233	2732	11
LOC116915384	5	23	205	87	59	62	202	33	676	26	133	118	93	21	192	110	85	761	1539	11	62	62	65	869	37	20	412	1318	2856	73	25	10	211	36	92	436	9	892	165	86	71	155	26	118	382	2550	678	4231	12
LOC116915385	189	254	344	235	773	642	1786	91	4314	177	1006	524	1275	105	720	312	210	1141	5470	203	559	278	878	6463	157	65	508	3782	12893	208	81	63	712	108	707	749	28	2656	527	506	751	305	36	178	583	5689	417	8992	58
LOC116915386	14	47	90	36	113	152	134	3	589	27	129	89	187	15	157	126	57	255	1042	35	89	62	127	1500	24	9	88	771	2705	61	30	15	141	17	94	143	13	514	124	74	186	41	11	49	130	1035	98	1748	10
LOC116915387	87	195	831	91	315	374	165	44	2102	77	593	320	1382	109	518	75	13	301	3388	73	643	377	466	3516	152	0	26	1015	6268	308	128	97	267	44	207	193	5	1249	616	377	711	163	13	32	30	1031	103	3076	47
LOC116915388	0	0	0	0	2	6	0	0	8	1	0	1	4	0	1	1	0	0	8	0	1	0	1	12	0	0	0	1	15	0	0	0	2	0	0	2	0	4	0	1	2	1	0	1	0	5	0	10	0
LOC116915390	39	133	287	126	188	252	259	46	1330	57	314	115	247	106	286	211	96	492	1924	80	191	125	169	1806	71	94	338	1876	4750	131	78	60	240	66	144	309	22	1050	159	127	226	136	77	223	265	2976	449	4638	15
LOC116915391	72	182	462	206	1225	1194	2462	65	5868	84	1319	352	2025	285	1324	731	330	1845	8295	90	964	453	1579	10920	110	50	1226	9799	25191	396	126	89	1368	146	1240	1128	11	4504	974	381	1116	393	619	795	1366	10335	1268	17247	40
LOC116915392	32	49	50	38	152	150	129	7	607	30	140	47	111	18	144	57	52	169	768	24	65	42	139	1070	24	17	82	841	2304	18	11	5	106	17	92	136	14	399	92	38	106	45	11	56	146	1303	78	1875	12
LOC116915393	0	6	1	1	13	8	3	0	32	3	3	3	4	7	0	4	0	2	26	2	2	2	0	35	4	3	6	27	81	3	0	3	7	0	2	4	0	19	25	5	5	0	0	15	5	28	2	85	2
LOC116915394	1	2	6	0	12	22	6	0	49	0	17	6	23	1	7	7	2	4	67	0	9	1	7	54	0	0	4	16	91	3	1	2	5	0	0	1	3	15	11	10	16	1	0	5	9	21	0	73	1
LOC116915395	94	218	447	277	719	919	800	78	3552	71	880	254	654	179	871	491	297	1097	4794	100	424	309	573	6146	190	133	948	6013	14836	175	81	65	806	94	388	816	34	2459	421	98	436	355	150	464	779	10941	861	14505	63
LOC116915396	8	11	13	11	81	73	77	2	276	0	60	11	40	7	61	24	28	103	334	7	41	18	59	517	7	8	75	577	1309	5	3	0	74	4	30	59	0	175	29	9	33	17	4	28	74	671	40	905	4
LOC116915397	16	29	40	21	24	37	41	2	210	23	122	39	72	2	41	22	6	41	368	27	65	17	54	296	9	2	14	90	574	26	13	8	30	4	47	22	1	151	31	74	85	35	1	4	13	181	15	439	4
LOC116915398	0	0	1	0	0	0	0	0	1	0	0	1	0	0	0	1	0	0	2	0	0	0	0	1	0	0	0	2	3	0	0	0	0	0	0	0	0	0	0	0	1	3	0	0	0	3	0	7	0
LOC116915399	0	0	0	0	0	0	0	0	0	0	0	0	0	0	0	0	0	0	0	0	3	1	1	0	0	0	1	3	9	0	0	0	0	0	1	3	0	4	13	2	1	0	0	0	0	2	0	18	2
LOC116915400	0	0	2	0	0	2	1	3	8	0	3	0	4	0	0	3	1	3	14	0	5	1	1	6	0	0	0	5	18	1	0	0	0	0	0	0	0	1	0	0	0	0	0	1	0	10	0	11	0
LOC116915401	544	598	620	862	719	632	217	387	4579	131	2932	604	1206	1258	1013	5	33	35	7217	160	947	708	954	6808	635	0	5	275	10492	347	223	469	872	522	2977	24	0	5434	560	884	1024	612	421	208	1	862	163	4735	164
LOC116915402	141	285	465	260	1107	1234	2209	97	5798	172	1353	358	1060	204	956	639	451	1646	6839	223	606	443	1340	9745	205	188	1006	7992	21748	229	99	114	932	104	668	1305	37	3488	667	339	945	248	112	343	864	10976	806	15300	83
LOC116915403	3	0	20	29	19	2	113	8	194	0	17	1	6	27	31	5	20	251	358	0	27	8	11	38	5	13	125	178	405	2	2	6	44	14	23	57	13	161	20	0	2	64	7	14	55	408	167	737	0
LOC116915404	4	0	0	2	2	5	19	0	32	2	2	0	11	0	3	1	7	13	39	2	2	0	4	20	0	3	4	32	67	0	0	1	6	0	6	9	1	23	1	4	2	1	0	2	5	36	2	53	0
LOC116915405	0	0	0	2	1	1	0	0	4	0	1	0	0	0	0	0	0	0	1	0	0	0	0	4	0	0	0	0	4	0	0	0	0	0	0	1	0	1	1	0	1	0	0	0	0	0	0	2	3
LOC116915406	0	2	1	1	1	1	1	0	7	0	0	0	0	0	1	0	0	1	2	0	0	1	0	6	0	0	0	3	10	1	0	0	0	0	0	0	0	1	1	0	0	0	0	0	0	4	1	6	0
LOC116915407	0	0	0	1	4	5	8	0	18	0	1	2	5	0	2	2	0	2	14	0	0	0	0	7	1	1	4	27	40	0	0	0	3	0	1	8	1	13	1	1	5	0	0	2	10	87	2	108	0
LOC116915408	0	0	0	2	0	0	0	0	2	0	1	2	0	0	0	4	0	0	7	5	2	0	0	0	0	0	2	2	11	0	0	0	0	0	0	1	0	1	10	2	1	0	0	1	1	2	0	17	3
LOC116915409	3	6	15	12	32	26	43	0	137	1	52	22	41	6	32	33	7	46	240	8	22	6	30	226	9	2	20	172	495	17	9	6	33	2	33	34	3	137	25	12	52	17	11	30	41	227	61	476	1
LOC116915411	25	53	86	45	421	456	494	17	1597	26	226	75	230	31	354	182	145	422	1691	31	115	114	325	2784	38	29	330	3222	6988	54	15	20	360	27	130	477	8	1091	191	68	172	65	8	165	539	3910	205	5323	9
LOC116915412	3	9	15	4	9	9	21	2	72	8	22	9	24	3	14	8	3	19	110	9	8	5	8	67	1	2	2	25	127	2	1	0	9	1	23	4	0	40	7	15	9	11	1	1	3	33	4	84	0
LOC116915413	73	174	439	236	856	993	1060	58	3889	76	712	304	824	182	896	403	374	1157	4928	99	437	345	917	7055	114	98	877	6434	16376	265	94	34	828	95	424	852	52	2644	620	168	550	275	184	538	884	8421	744	12384	34
LOC116915414	2	0	0	0	0	0	1	0	3	0	2	1	0	0	2	2	2	0	9	0	1	0	0	1	0	0	0	0	2	0	0	0	0	2	0	0	0	2	0	0	0	0	0	0	0	1	1	2	0
LOC116915415	0	0	0	0	0	1	1	0	2	0	0	1	0	0	0	1	0	2	4	1	0	0	0	1	0	0	1	1	4	0	0	0	0	0	2	0	0	2	0	0	0	0	0	0	1	0	1	2	0
LOC116915416	0	0	0	0	1	0	0	0	1	0	0	0	0	0	1	0	0	0	1	0	0	1	0	6	1	0	0	4	12	0	0	0	2	0	0	0	0	2	0	0	0	0	0	0	0	0	0	0	0
LOC116915417	1	0	2	1	4	15	2	0	25	0	2	1	0	1	0	0	0	0	4	0	2	3	6	51	0	0	0	1	63	0	0	1	2	0	3	0	0	6	6	2	6	0	0	0	0	0	0	14	0
LOC116915418	60	2	2	58	262	381	1049	17	1831	11	235	7	720	105	147	0	89	1	1315	5	22	34	144	2282	131	8	6	1696	4328	60	0	13	354	123	279	220	1	1050	35	5	216	146	83	105	1	3345	2	3938	92
LOC116915419	1	0	0	0	0	1	0	0	2	0	0	1	0	1	3	0	2	0	7	0	0	0	0	9	1	2	0	17	29	0	0	0	0	0	1	1	1	3	5	0	3	0	0	0	0	62	0	70	0
LOC116915420	53	204	409	129	378	557	589	47	2366	146	454	574	512	149	649	538	192	869	4083	143	280	245	342	5161	124	48	704	4806	11853	251	122	81	574	85	309	731	13	2166	457	349	626	218	274	458	648	6354	710	10094	26
LOC116915422	18	0	9	8	147	71	847	5	1105	1	36	6	147	6	12	0	11	79	298	0	11	3	19	213	21	1	16	139	423	18	0	5	118	4	238	47	1	431	38	12	105	60	7	16	13	372	45	668	15
LOC116915423	19	83	169	60	148	203	244	18	944	39	207	92	231	57	225	204	89	418	1562	44	163	55	155	1754	31	38	301	1958	4499	81	64	22	206	24	116	289	19	821	153	74	152	120	91	202	365	2853	349	4359	8
LOC116915424	6	0	12	11	10	16	60	20	135	0	4	6	101	48	15	1	9	28	212	0	15	5	8	190	14	19	65	235	551	3	1	6	73	55	129	90	13	370	4	3	8	53	43	42	12	451	30	646	16
LOC116915425	29	56	104	38	128	141	144	19	659	44	147	121	115	31	129	94	31	162	874	40	117	54	99	1048	43	19	117	815	2352	63	37	20	140	30	86	139	7	522	91	91	146	54	25	89	103	1258	131	1988	19
LOC116915426	7	0	0	1	51	85	77	0	221	0	27	1	83	12	24	1	0	0	148	0	2	7	17	224	6	1	0	58	315	11	0	4	31	11	16	4	0	77	11	6	31	22	8	12	0	110	0	200	3
LOC116915427	3	10	26	20	69	78	95	12	313	8	53	72	81	18	84	32	19	116	483	11	37	42	58	667	10	2	66	437	1330	16	10	1	56	16	53	72	3	227	59	39	58	22	8	33	54	598	53	924	4
LOC116915428	0	0	1	0	3	7	1	1	13	0	1	0	0	4	0	3	0	1	9	1	1	1	2	10	0	0	3	1	19	0	0	1	6	0	0	0	0	7	0	0	2	0	0	0	0	8	1	11	0
LOC116915429	36	21	68	40	560	594	658	20	1997	27	177	42	380	30	518	150	190	544	2058	18	187	104	493	5100	12	17	458	4871	11260	28	24	13	556	13	186	589	7	1416	356	52	145	40	32	283	663	4652	313	6536	10
LOC116915431	0	9	2	0	3	4	2	0	20	1	9	2	6	0	3	4	0	8	33	2	2	2	1	31	1	0	1	22	62	0	1	0	2	0	4	5	0	12	10	1	3	2	1	0	3	21	1	42	0
LOC116915432	22	32	55	30	283	269	268	4	963	8	205	28	208	13	148	97	81	261	1049	27	136	59	257	1745	8	7	119	1244	3602	24	13	7	176	3	111	155	9	498	159	45	137	50	3	58	195	1657	105	2409	5
LOC116915433	15	23	60	42	95	176	70	13	494	23	79	113	113	41	169	100	45	143	826	22	53	61	114	1142	42	9	118	1042	2603	59	18	22	181	24	73	176	3	556	84	47	95	33	70	142	125	1469	161	2226	12
LOC116915434	4	8	17	6	50	79	41	10	215	2	41	36	47	19	62	28	9	35	279	11	36	42	34	487	20	16	34	520	1200	26	3	0	92	10	47	71	5	254	21	13	55	22	35	102	28	488	52	816	2
LOC116915435	0	2	0	0	1	0	0	2	5	0	0	1	0	0	1	1	0	0	3	0	0	0	1	2	0	0	0	0	3	0	0	2	0	0	3	0	0	5	0	0	1	0	1	3	0	0	1	6	2
LOC116915436	0	1	0	0	0	0	0	0	1	0	0	0	0	0	0	1	0	2	3	0	0	0	0	1	0	0	3	1	5	1	1	0	1	0	0	6	1	10	0	0	0	0	2	0	0	0	0	2	1
LOC116915437	1	1	3	0	3	2	5	0	15	0	18	2	27	0	8	1	0	5	61	3	16	2	15	51	0	0	0	4	91	2	2	0	0	0	5	1	0	10	6	3	6	2	0	0	0	1	1	19	0
LOC116915438	232	645	1639	364	575	896	247	162	4760	311	1788	1161	1090	596	1259	187	43	170	6605	182	1561	1021	808	8340	513	1	28	876	13330	978	433	397	1060	162	814	184	2	4030	1161	1087	1911	673	206	239	23	1076	190	6566	106
LOC116915439	11	37	77	32	93	116	131	7	504	18	90	105	135	21	156	109	44	179	857	34	58	37	80	1106	29	12	174	980	2510	42	14	8	129	15	63	149	3	423	98	59	124	57	35	105	142	1279	138	2037	3
LOC116915440	9	13	31	38	563	598	936	11	2199	16	198	61	280	28	667	221	275	887	2633	23	80	130	611	5385	26	23	932	7546	14756	46	7	9	660	18	161	1461	12	2374	254	26	153	56	36	543	1307	7914	607	10896	10
LOC116915441	16	29	33	17	137	122	356	10	720	19	80	44	226	10	186	58	37	199	859	15	42	13	190	932	20	15	100	587	1914	31	9	3	143	5	98	197	13	499	49	50	112	27	12	47	137	916	68	1418	6
LOC116915442	16	4	4	1	20	12	6	1	64	7	35	10	44	0	18	0	1	2	117	10	22	8	29	169	1	0	0	4	243	2	1	0	16	1	46	0	2	68	4	10	25	5	0	0	0	9	0	53	0
LOC116915443	1	12	9	4	26	36	26	2	116	8	19	1	37	3	30	6	5	24	133	4	5	11	25	273	5	1	18	75	417	6	0	7	30	9	9	19	2	82	9	9	27	6	0	19	14	80	9	173	6
LOC116915444	21	13	12	9	30	41	12	0	138	15	65	27	44	7	37	2	3	11	211	6	22	16	42	307	10	0	0	40	443	13	5	3	41	5	40	13	0	120	17	34	31	6	13	2	2	30	7	142	0
LOC116915445	8	9	57	51	112	78	651	15	981	16	28	43	411	15	198	205	249	1229	2394	12	25	15	80	1139	12	53	921	4296	6553	21	6	9	233	12	105	1297	14	1697	70	31	38	52	25	245	973	5792	458	7684	11
LOC116915446	17	68	131	88	220	228	253	36	1041	53	213	93	172	66	260	186	116	409	1568	41	132	100	187	1938	62	39	345	2642	5486	67	23	26	229	29	81	333	24	812	164	65	159	106	37	186	323	3506	295	4841	9
LOC116915447	1	0	0	0	0	0	2	0	3	0	2	1	0	0	0	1	0	2	6	0	0	0	1	8	0	0	0	3	12	0	1	0	1	1	0	1	0	4	0	9	2	0	0	0	2	0	1	14	0
LOC116915448	262	299	848	181	160	286	67	52	2155	133	1282	448	1679	334	299	159	12	226	4572	151	700	381	313	2330	260	0	29	542	4706	347	214	121	151	96	318	87	0	1334	327	546	755	192	45	19	23	492	127	2526	57
LOC116915449	85	202	637	116	439	630	173	59	2341	96	891	366	815	145	1101	90	28	202	3734	86	534	532	1042	8190	248	1	6	615	11254	252	73	66	576	40	524	132	0	1663	454	300	770	196	37	65	5	524	87	2438	43
LOC116915450	17	27	34	35	84	112	112	14	435	17	87	36	105	11	112	37	29	122	556	12	48	41	91	694	12	8	80	616	1602	23	9	6	95	12	64	87	11	307	50	38	80	47	9	36	81	965	56	1362	13
LOC116915451	2	1	30	171	9	1	197	52	463	0	5	12	193	186	42	5	25	393	861	1	109	20	41	451	47	105	403	428	1605	21	4	23	155	134	338	227	33	935	13	5	2	300	35	66	131	1007	393	1952	6
LOC116915452	2	2	1	0	5	18	21	1	50	0	15	2	32	4	7	0	0	0	60	0	9	2	7	54	1	0	0	2	75	3	0	0	4	3	11	1	1	23	2	2	9	1	0	4	0	21	0	39	0
LOC116915453	0	3	89	6	33	44	24	0	199	3	42	22	34	7	21	2	1	40	172	3	96	34	56	333	3	0	0	113	638	58	6	1	3	0	4	23	1	96	61	14	91	10	0	1	2	66	4	249	0
LOC116915454	123	76	88	45	143	93	77	16	661	41	572	69	324	35	105	18	4	39	1207	62	351	58	308	932	46	0	1	83	1841	57	24	23	54	7	193	17	2	377	97	200	184	79	2	3	4	90	15	674	14
LOC116915455	0	0	3	1	0	0	10	1	15	0	0	0	2	3	3	0	1	29	38	0	3	2	3	55	1	6	20	39	129	0	0	0	10	2	8	25	0	45	5	1	0	4	4	7	16	62	37	136	0
LOC116915456	132	145	375	110	155	233	94	38	1282	152	840	368	830	72	353	92	6	127	2840	114	420	214	326	2331	134	1	14	457	4011	146	78	74	238	36	191	76	1	840	216	455	413	135	17	21	11	332	60	1660	29
LOC116915457	6	4	3	19	21	4	155	5	217	2	15	6	33	3	15	10	13	94	191	1	14	2	20	93	5	7	20	114	276	1	0	1	25	6	58	30	3	124	2	9	3	39	0	5	21	192	29	300	2
LOC116915460	33	47	172	94	235	324	216	32	1153	28	149	157	219	83	317	191	113	333	1590	33	80	123	163	2143	83	67	407	3015	6114	92	44	27	287	46	95	524	25	1140	163	59	181	73	107	302	395	3769	457	5506	10
LOC116915462	3	0	131	219	16	0	333	51	753	0	33	50	209	265	86	34	44	893	1614	0	135	57	42	471	47	84	581	630	2047	53	15	22	237	124	407	253	59	1170	26	36	0	498	150	120	222	1943	881	3876	6
LOC116915463	3	17	132	6	20	17	39	5	239	9	69	74	36	20	47	128	26	113	522	30	51	17	13	293	16	17	129	443	1009	41	24	20	22	45	10	49	8	219	48	54	52	66	97	20	96	778	231	1442	5
LOC116915464	137	158	215	299	854	702	712	138	3215	96	1938	319	3810	466	951	5	24	19	7628	115	235	586	1349	6003	569	0	4	940	9801	293	71	321	828	487	1754	16	0	3770	169	286	776	404	587	293	3	1855	43	4416	97
LOC116915466	0	0	0	0	0	1	6	0	7	0	0	0	0	0	1	0	3	1	5	0	0	0	0	8	4	1	5	3	21	0	0	1	2	0	2	3	0	8	0	0	0	0	0	0	1	13	6	20	0
LOC116915467	0	0	2	9	0	0	44	5	60	0	1	1	22	15	0	0	1	20	60	0	11	2	6	45	6	9	11	28	118	2	0	1	15	6	20	12	3	59	1	0	0	14	7	8	14	63	41	148	1
LOC116915468	1	13	16	8	84	80	99	0	301	0	43	32	81	7	77	49	37	91	417	5	19	30	77	796	5	0	99	809	1840	30	4	1	85	6	25	80	2	233	66	17	50	7	18	81	112	870	73	1294	0
LOC116915469	66	89	162	131	903	870	702	64	2987	29	623	151	654	118	658	253	271	919	3676	81	386	226	758	6720	75	46	579	4942	13813	144	52	28	730	36	396	731	14	2131	591	135	464	185	126	329	589	5624	605	8648	34
LOC116915470	3	1	292	582	37	0	1013	240	2168	0	58	77	1108	1032	257	56	97	1535	4220	2	389	123	140	1348	209	436	1361	1888	5896	121	48	129	917	587	1323	915	215	4255	54	79	6	1258	744	442	612	6501	1734	11430	22
LOC116915471	0	0	3	31	2	0	65	17	118	0	3	4	33	37	8	0	3	69	157	0	21	5	5	174	17	26	66	88	402	1	1	5	33	27	76	40	8	191	4	4	0	42	20	19	20	184	94	387	6
LOC116915472	1	0	84	173	10	2	226	64	560	0	28	10	125	134	67	9	35	479	887	0	128	28	31	399	57	62	300	386	1391	20	3	20	126	57	242	176	27	671	20	22	4	357	50	52	124	1224	395	2248	9
LOC116915473	2	0	117	198	6	1	255	77	656	0	10	16	377	164	87	4	45	609	1312	0	197	41	71	647	48	74	352	592	2022	28	6	15	332	79	668	270	36	1434	8	29	1	485	27	66	140	1466	407	2629	3
LOC116915474	6	1	98	418	18	1	441	144	1127	1	16	43	998	723	215	24	160	1392	3572	0	202	127	84	1226	196	373	1640	2398	6246	72	20	96	871	475	981	890	123	3528	14	33	5	662	464	438	556	6612	1562	10346	29
LOC116915477	384	845	1816	1150	5180	5800	5663	368	21206	439	3538	1564	3733	703	5395	2790	2105	7089	27356	554	2087	1685	4815	43575	709	479	5372	36678	95954	1219	422	261	5065	358	2027	5833	216	15401	3514	948	3422	1328	453	2445	5422	54056	4843	76431	256
LOC116915478	1	0	33	217	25	0	684	56	1016	0	62	16	361	209	71	24	41	839	1623	1	175	30	99	436	42	110	435	692	2020	18	6	24	202	114	549	260	41	1214	23	22	2	414	88	50	206	1271	438	2514	10
LOC116915479	1	0	2	0	2	0	4	0	9	1	0	0	6	0	2	0	0	3	12	0	6	2	2	13	0	0	1	5	29	0	0	0	7	0	12	6	0	25	0	0	0	2	1	0	4	16	7	30	0
LOC116915480	2	0	3	34	16	0	106	9	170	1	17	0	40	36	9	8	8	126	245	0	26	4	10	81	1	8	65	88	283	5	2	9	46	17	47	34	4	164	18	8	1	69	23	21	42	203	165	550	1
LOC116915481	185	641	3260	617	1559	1776	754	157	8949	371	3105	1353	2479	485	2042	634	135	2363	12967	246	2045	1891	3255	19327	726	6	305	6447	34248	1865	387	338	944	122	1241	1176	14	6087	2808	1234	3976	977	11	74	215	5042	1036	15373	105
LOC116915482	8	2	126	273	41	16	312	83	861	3	19	34	800	208	107	16	27	522	1736	0	207	37	53	678	69	68	439	592	2143	58	8	17	458	140	699	330	36	1746	18	34	1	465	115	144	124	1374	448	2723	28
LOC116915483	7	3	307	363	23	5	862	105	1675	2	18	64	1283	401	307	27	113	1788	4003	0	345	149	176	1464	155	184	1365	2229	6067	107	25	42	1202	325	1643	896	98	4338	22	45	6	951	514	435	437	5398	1649	9457	8
LOC116915484	8	0	176	284	30	9	512	60	1079	0	13	30	941	248	198	8	68	712	2218	0	196	86	125	1342	112	80	687	1638	4266	65	11	29	1197	204	1165	581	45	3297	12	15	4	431	194	533	253	4899	776	7117	34
LOC116915486	15	0	25	74	29	12	265	34	454	0	9	18	688	107	44	2	35	145	1048	0	90	13	65	462	73	64	119	390	1276	9	2	9	390	65	669	217	19	1380	5	10	6	232	31	45	33	811	86	1259	18
LOC116915487	0	0	0	0	7	10	8	0	25	0	3	0	7	2	3	0	0	11	26	0	3	2	4	64	1	0	4	29	107	0	0	2	9	0	1	11	0	23	3	0	0	2	0	7	4	48	4	68	0
LOC116915488	4	0	29	107	10	0	315	41	506	0	13	8	370	122	26	3	13	216	771	0	137	15	28	307	40	83	149	145	904	7	1	23	140	67	389	79	44	750	1	17	3	238	24	18	53	481	185	1020	13
LOC116915489	3	1	20	61	19	2	284	27	417	0	6	1	287	97	9	1	15	77	493	0	65	9	39	157	24	18	29	108	449	0	3	13	77	53	302	52	13	513	9	5	1	90	22	13	16	326	44	526	13
LOC116915490	6	0	3	2	4	2	41	1	59	0	3	0	42	0	1	0	1	12	59	0	8	1	7	18	2	4	2	25	67	0	0	0	8	0	36	8	0	52	0	2	0	6	0	1	3	86	2	100	5
LOC116915491	26	3	18	25	74	118	361	9	634	30	93	107	840	21	158	14	7	3	1273	6	12	63	107	467	44	0	0	200	899	76	11	23	90	31	141	6	0	378	46	85	279	50	57	25	0	454	3	999	17
LOC116915492	2	0	1	0	23	12	90	0	128	1	5	0	17	0	27	0	9	109	168	0	2	4	12	362	2	0	45	162	589	3	0	1	48	1	18	39	0	110	24	2	4	6	7	18	19	153	19	252	2
LOC116915493	154	110	135	6	43	14	212	14	688	167	554	106	977	5	34	59	5	200	2107	156	702	83	246	118	36	0	0	97	1438	91	44	22	14	2	113	28	2	316	146	989	952	136	0	0	8	73	17	2321	17
LOC116915494	3	1	115	173	24	13	332	51	712	0	36	27	399	204	81	32	44	525	1348	1	176	24	60	455	72	116	294	743	1941	19	9	25	257	85	563	281	56	1295	19	53	6	441	56	120	162	2012	448	3317	6
LOC116915495	17	10	21	22	166	341	99	9	685	3	69	49	234	111	144	36	14	351	1011	3	38	62	61	1478	42	16	249	1079	3028	72	8	12	272	37	147	309	8	865	104	16	108	70	157	227	111	1405	397	2595	5
LOC116915496	0	3	0	0	0	4	0	0	7	1	4	0	1	0	0	0	0	4	10	0	0	1	0	7	2	2	2	25	39	0	1	3	0	0	0	2	0	6	0	4	3	0	1	7	0	11	4	30	0
LOC116915497	1	0	0	2	34	33	65	0	135	0	43	5	165	2	19	0	0	1	235	0	10	11	41	156	1	0	0	15	234	4	0	0	27	0	33	4	0	68	15	1	59	6	0	0	0	20	0	101	2
LOC116915500	0	2	239	415	106	9	747	67	1585	1	86	165	802	512	580	333	282	4318	7079	1	276	214	191	2894	141	129	3718	5851	13415	154	23	47	1702	307	1236	1691	133	5293	194	107	14	839	185	844	1348	11940	4278	19749	7
LOC116915501	0	0	7	5	7	0	26	0	45	0	0	0	3	2	2	6	0	24	37	0	8	1	2	42	2	1	25	87	168	5	1	0	20	0	15	25	0	66	10	1	0	4	3	13	15	132	46	224	0
LOC116915502	2	4	3	12	5	12	6	2	46	0	5	5	8	15	6	10	2	11	62	0	0	1	5	42	7	2	6	60	123	5	1	3	6	4	1	8	1	29	2	0	3	4	9	1	11	75	4	109	3
LOC116915503	8	20	461	87	84	14	700	14	1388	6	45	84	270	52	689	372	188	2894	4600	9	285	216	216	2285	31	37	2389	6181	11649	162	85	14	965	36	792	2212	22	4288	441	70	42	311	133	908	1161	7993	2483	13542	14
LOC116915504	4	0	12	43	20	0	196	29	304	0	24	4	169	45	31	16	5	219	513	3	73	15	18	123	17	27	137	165	578	11	1	6	64	21	196	85	13	397	14	14	2	108	9	15	45	396	168	771	2
LOC116915506	3	1	6	0	7	9	5	0	31	0	12	4	16	0	2	1	2	1	38	1	7	4	4	44	0	1	2	11	74	5	0	1	2	1	1	1	1	12	10	4	4	3	2	4	2	11	3	43	0
LOC116915507	36	123	246	172	377	521	344	63	1882	114	265	254	353	126	483	350	202	732	2879	63	205	192	310	3518	118	145	720	5532	10803	192	84	62	480	76	201	849	61	2005	345	127	333	146	239	557	694	6970	667	10078	33
LOC116915508	0	7	7	6	58	86	244	2	410	2	22	4	93	14	67	48	24	151	425	5	13	18	73	882	2	5	103	649	1750	9	2	0	69	5	34	122	1	242	40	1	17	24	17	53	83	1102	99	1436	0
LOC116915509	0	0	0	0	2	0	8	0	10	0	0	0	1	0	0	2	1	8	12	2	4	0	2	2	0	0	0	1	11	0	0	0	1	0	0	4	0	5	1	0	0	1	0	1	2	9	0	14	0
LOC116915510	1	1	0	0	0	1	2	0	5	0	0	0	0	0	0	0	1	3	4	0	0	1	1	4	0	0	0	10	16	0	0	0	0	0	0	1	0	1	0	1	0	3	0	0	1	6	0	11	0
LOC116915511	0	0	11	1	20	19	27	2	80	0	33	8	31	2	6	15	6	13	114	3	46	7	20	187	1	2	12	132	410	8	2	1	20	0	40	22	0	93	26	8	24	9	5	25	10	91	5	203	0
LOC116915512	45	40	291	182	1434	2596	1601	30	6219	24	776	291	1736	272	1406	131	290	3564	8490	12	372	439	688	12971	246	103	2989	10610	28430	588	59	33	2563	126	2321	2834	20	8544	647	60	1017	545	974	2815	1381	14397	2885	24721	32
LOC116915513	141	386	682	566	2078	2812	1235	185	8085	80	1135	564	1035	760	2056	1304	804	2414	10152	162	596	920	1393	17723	483	332	2671	22132	46412	495	139	157	2170	401	741	3028	217	7348	1105	237	1052	612	593	1961	2572	28887	2967	39986	99
LOC116915514	1	0	0	0	14	1	70	0	86	0	2	1	10	0	3	1	1	75	93	0	1	0	11	117	0	0	12	47	188	0	0	0	10	0	19	16	0	45	3	3	1	1	0	0	10	56	8	82	0
LOC116915515	18	3	5	10	230	115	664	2	1047	2	101	16	446	5	87	3	14	244	918	6	39	10	111	1153	5	3	71	283	1681	15	1	1	118	0	163	68	1	367	69	21	112	46	4	17	36	347	53	705	9
LOC116915517	2	0	0	0	6	3	15	0	26	0	2	0	2	0	3	0	1	9	17	0	2	0	2	40	0	0	9	35	88	1	0	0	5	0	4	10	0	20	0	0	0	1	0	3	4	24	7	39	0
LOC116915518	0	1	3	3	22	9	123	1	162	0	11	0	14	2	3	0	0	49	79	0	3	2	17	203	1	0	22	64	312	2	0	0	19	1	20	17	0	59	6	5	10	3	0	9	11	68	12	124	1
LOC116915520	12	3	23	13	193	180	738	3	1165	0	78	31	307	22	115	35	20	467	1075	2	50	33	104	1246	12	8	340	910	2705	60	4	2	316	18	350	301	2	1053	76	26	71	80	72	256	175	1477	355	2588	1
LOC116915521	0	0	0	0	2	0	3	0	5	0	0	0	0	0	0	0	0	2	2	0	0	0	0	3	0	0	1	3	7	0	0	0	0	0	0	0	0	0	0	0	0	0	0	0	0	1	0	1	0
LOC116915522	4	2	2	9	95	51	320	0	483	1	42	1	138	7	44	6	11	232	482	0	13	10	55	540	1	6	96	305	1026	9	1	2	68	7	106	80	3	276	44	9	23	22	2	28	50	376	58	612	2
LOC116915524	2	0	0	0	12	10	53	0	77	0	3	0	17	0	3	1	0	15	39	0	2	0	6	73	0	0	10	20	111	1	0	0	7	3	7	5	2	25	2	1	4	0	3	1	3	23	4	41	2
LOC116915525	1	0	2	4	27	11	87	2	134	0	4	1	25	7	6	1	6	83	133	0	3	2	4	164	5	6	48	148	380	2	2	0	23	5	28	51	2	113	7	0	7	16	6	23	24	210	43	336	0
LOC116915526	0	0	0	0	4	3	14	0	21	0	1	1	10	2	2	1	0	7	24	0	1	0	1	68	1	0	9	30	110	0	3	0	6	1	2	6	0	18	0	0	3	1	2	3	5	43	5	62	1
LOC116915527	5	0	2	2	25	10	195	0	239	0	19	0	72	3	14	1	6	86	201	0	2	1	24	109	1	1	11	55	204	2	0	0	16	0	41	15	0	74	7	5	13	24	0	1	10	48	6	114	1
LOC116915528	4	1	8	5	82	35	423	1	559	3	48	0	160	8	48	5	13	274	559	0	13	7	60	574	6	2	83	329	1074	9	0	1	103	3	94	74	0	284	36	7	28	29	4	25	50	371	76	626	3
LOC116915529	0	0	0	0	3	3	2	0	8	0	0	0	1	1	3	0	0	2	7	0	0	1	2	21	1	0	8	6	39	0	0	0	9	0	0	3	0	12	0	0	0	0	0	0	2	10	4	16	0
LOC116915531	7	63	114	1	1	8	3	2	199	4	19	14	56	12	5	138	24	44	316	30	50	20	5	550	4	3	7	156	825	105	105	10	1	0	1	39	1	262	52	80	116	36	1	0	68	66	93	512	11
LOC116915532	62	128	386	31	96	107	174	5	989	93	387	93	1063	53	87	111	16	398	2301	49	722	163	219	829	40	1	49	581	2653	244	102	44	47	2	43	91	2	575	341	211	535	62	22	13	77	414	125	1800	20
LOC116915534	76	62	103	136	174	132	41	59	783	37	600	141	159	144	450	2	7	24	1564	28	91	187	362	2435	154	0	2	186	3445	44	22	79	329	84	424	12	0	994	82	47	120	75	75	72	1	348	29	849	22
LOC116915535	148	400	1383	187	313	587	216	92	3326	168	1046	757	964	149	356	175	22	124	3761	127	1129	352	333	3883	222	0	23	698	6767	717	269	121	259	44	356	88	1	1855	987	795	1457	327	28	22	17	328	85	4046	61
LOC116915536	149	112	88	128	157	62	52	89	837	20	536	82	334	72	111	4	5	19	1183	36	327	63	182	993	91	0	1	17	1710	36	27	57	115	34	583	9	0	861	79	236	196	226	8	6	0	54	12	817	38
LOC116915537	36	31	28	38	58	18	13	16	238	6	163	23	102	26	43	4	2	3	372	8	66	37	65	388	32	0	0	23	619	10	5	19	34	14	218	1	0	301	35	45	69	46	4	3	0	36	3	241	14
LOC116915538	67	28	42	55	48	30	18	13	301	5	199	17	63	32	38	0	0	7	361	17	112	25	63	408	33	0	0	18	676	20	7	17	30	17	195	1	0	287	44	60	51	55	13	8	0	26	10	267	10
LOC116915539	11	20	234	81	784	1543	1246	15	3934	26	255	155	1080	138	1100	470	308	4188	7720	4	231	259	529	9951	47	33	3329	9977	24360	381	55	9	2385	92	1368	2784	24	7098	796	64	388	377	1226	3430	1566	13497	3744	25088	13
LOC116915541	7	10	78	78	43	4	181	6	407	0	65	19	57	21	52	94	65	487	860	20	67	21	20	276	27	51	245	652	1379	24	10	6	126	25	80	269	7	547	125	32	24	140	4	13	193	1352	350	2233	8
LOC116915543	13	22	18	10	33	14	82	5	197	7	101	14	104	1	17	17	10	64	335	31	46	7	44	181	3	1	6	53	372	8	5	6	5	1	47	15	0	87	19	53	40	33	1	0	9	98	9	262	7
LOC116915546	5	19	10	30	70	50	118	3	305	5	42	15	27	32	85	88	48	134	476	9	13	17	38	349	18	36	126	1099	1705	7	3	8	58	7	18	133	14	248	26	4	37	14	18	31	96	1848	94	2168	4
LOC116915547	20	60	121	52	96	161	128	25	663	79	197	244	216	69	266	222	53	293	1639	48	79	98	111	1188	53	54	251	1186	3068	64	48	35	249	52	121	329	32	930	130	127	182	93	77	146	213	2111	296	3375	18
LOC116915548	2	4	1	12	38	25	61	11	154	0	26	3	14	23	42	55	30	69	262	1	6	2	25	173	7	16	98	642	970	6	1	0	38	3	6	90	6	150	15	3	23	6	19	78	90	996	69	1299	7
LOC116915549	0	4	3	3	32	17	41	0	100	0	39	1	10	10	36	32	17	47	192	0	5	4	12	96	3	10	49	361	540	0	0	0	16	6	7	39	2	70	9	3	8	15	8	32	61	603	21	760	0
LOC116915550	0	4	3	4	10	24	20	1	66	2	16	6	0	5	21	13	11	27	101	4	5	4	6	48	3	8	42	226	346	0	1	2	14	2	1	37	3	60	5	4	11	8	8	23	33	401	15	508	1
LOC116915551	9	15	26	52	107	109	175	20	513	6	76	20	48	51	107	89	65	164	626	8	31	25	52	515	32	28	198	1485	2374	10	4	12	111	26	19	178	9	369	35	14	42	46	19	80	226	2443	110	3015	5
LOC116915552	0	2	10	9	6	26	22	5	80	6	9	16	12	6	21	6	5	25	106	4	9	9	9	180	2	3	23	110	349	13	5	1	25	5	6	19	2	76	14	4	15	3	6	12	14	175	29	272	0
LOC116915553	0	10	4	8	14	14	44	15	109	0	18	7	5	16	26	31	23	57	183	0	0	2	15	120	5	18	34	344	538	3	0	0	18	8	9	76	6	120	7	2	7	16	6	15	54	530	35	672	0
LOC116915554	4	13	13	12	22	32	32	1	129	2	26	9	23	5	30	15	5	36	151	2	11	8	20	140	9	7	19	167	383	5	0	1	33	2	25	29	1	96	10	15	11	15	10	11	36	269	17	394	0
LOC116915558	0	0	1	1	4	2	1	0	9	0	1	0	0	1	5	2	3	1	13	0	0	1	0	4	0	0	4	59	68	0	0	0	2	0	0	10	0	12	0	0	1	0	5	5	9	69	1	90	0
LOC116915559	0	4	5	9	13	22	7	1	61	0	9	7	12	1	22	4	3	20	78	2	7	10	7	155	6	0	13	113	313	7	1	3	20	0	4	23	0	58	9	0	15	1	7	13	7	105	7	164	4
LOC116915560	0	0	0	0	3	7	5	1	16	2	3	2	0	3	0	1	5	8	24	0	0	0	0	12	0	2	5	27	46	0	0	2	5	0	1	7	0	15	2	3	1	3	0	4	8	91	9	121	0
LOC116915562	3	3	18	5	13	14	22	0	78	33	30	104	63	0	34	17	6	28	315	12	20	13	24	208	4	0	15	251	547	55	23	4	43	3	21	36	0	185	21	100	142	10	8	20	13	169	17	500	0
LOC116915563	0	3	3	4	8	7	7	2	34	0	3	3	5	3	14	9	6	16	59	0	0	3	7	31	0	7	13	110	171	0	0	0	8	5	2	20	0	35	2	0	7	0	3	10	18	149	18	207	1
LOC116915564	0	0	2	6	2	5	8	0	23	0	1	1	1	3	8	4	3	8	29	1	2	1	1	17	5	2	3	78	110	1	0	0	7	0	1	9	0	18	3	0	5	2	2	5	7	61	22	107	0
LOC116915566	11	8	12	10	11	21	14	1	88	18	21	36	29	4	29	23	9	65	234	5	14	12	8	161	6	2	48	130	386	4	2	2	34	9	21	38	1	111	30	23	19	14	5	6	29	235	56	417	3
LOC116915569	0	1	1	2	9	3	5	0	21	4	8	1	2	1	13	7	4	10	50	0	0	1	2	27	3	3	16	73	125	0	0	3	15	1	5	11	0	35	5	3	3	2	4	10	13	107	17	164	0
LOC116915573	0	3	2	0	5	9	14	0	33	0	1	4	2	2	9	7	4	14	43	2	0	3	3	30	3	0	10	54	105	1	0	1	4	0	1	16	1	24	0	2	5	0	1	2	13	128	14	165	0
LOC116915576	0	2	2	2	1	5	1	1	14	4	7	24	16	0	1	1	0	4	57	0	4	1	1	17	0	0	1	6	30	1	0	2	1	0	0	1	1	6	4	13	11	0	0	0	0	0	4	32	0
LOC116915582	22	21	40	8	18	21	17	14	161	4	29	49	10	8	10	26	1	2	139	7	18	8	12	112	13	0	9	49	228	29	10	18	9	7	15	7	0	95	38	36	52	11	10	0	4	78	12	241	8
LOC116915584	0	0	0	0	0	3	1	0	4	0	0	0	1	0	1	0	0	1	3	0	0	0	0	1	0	0	2	6	9	0	0	0	0	0	1	0	0	1	0	0	1	0	0	1	0	1	0	3	0
LOC116915585	40	98	189	124	635	771	460	51	2368	45	260	105	390	66	539	358	226	676	2665	53	264	198	434	5179	77	68	545	5200	12018	95	25	57	538	61	216	629	39	1660	425	88	292	123	52	333	633	6270	429	8645	34
LOC116915586	1	1	0	0	2	2	0	0	6	1	6	12	12	0	3	0	2	2	38	0	3	3	5	13	0	0	0	2	26	0	0	1	0	0	0	1	0	2	3	1	2	0	0	0	0	0	1	7	0
LOC116915588	0	1	1	1	2	2	2	1	10	1	0	6	2	0	1	1	0	0	11	0	0	1	1	22	0	0	1	4	29	1	0	0	0	0	1	1	0	3	1	0	0	0	1	0	2	4	0	8	0
LOC116915589	7	10	29	19	9	5	8	6	93	3	22	17	20	14	18	7	8	32	141	6	21	5	8	81	24	35	16	73	269	9	8	8	20	4	17	10	5	81	18	23	15	10	1	3	13	119	25	227	4
LOC116915590	0	2	3	1	13	15	1	0	35	0	4	7	8	0	16	0	0	0	35	0	0	2	10	89	5	0	0	14	120	1	0	2	8	1	7	0	0	19	7	4	7	0	1	1	0	16	2	38	0
LOC116915591	0	0	1	0	1	2	1	1	6	0	0	3	0	0	3	0	0	0	6	0	0	1	0	19	1	0	0	1	22	0	1	0	1	0	0	0	0	2	0	3	0	1	1	0	0	0	1	6	0
LOC116915601	1	0	1	0	1	3	1	3	10	0	7	3	1	0	5	5	3	8	32	0	2	0	1	29	0	0	5	36	73	0	1	0	9	0	1	2	4	17	6	0	5	7	0	2	5	64	0	89	0
LOC116915602	43	135	239	87	172	343	276	48	1343	88	275	348	372	102	285	230	87	379	2166	95	184	150	212	2413	72	38	269	2058	5491	159	109	45	356	49	226	332	21	1297	257	206	399	111	136	279	300	2390	348	4426	36
LOC116915603	2	2	0	3	32	10	64	2	115	0	33	0	75	0	7	7	2	11	135	4	47	0	16	165	2	0	12	80	326	1	0	0	8	0	16	12	0	37	12	4	6	3	0	9	16	56	8	114	0
LOC116915604	43	110	188	68	81	191	69	25	775	79	196	126	141	73	135	120	31	165	1066	75	141	111	91	964	50	16	116	606	2170	104	79	54	137	64	88	123	16	665	122	109	190	101	99	114	89	999	162	1985	35
LOC116915605	3	17	47	9	26	41	32	0	175	4	51	38	49	3	42	28	10	39	264	12	30	16	33	281	13	0	21	148	554	14	6	2	24	3	24	17	1	91	39	25	68	11	11	16	29	214	27	440	4
LOC116915606	7	0	1	1	5	2	2	0	18	0	6	1	3	0	2	2	0	4	18	0	5	2	0	36	1	0	1	16	61	0	0	1	0	0	3	2	0	6	2	0	1	0	1	2	3	25	2	36	0
LOC116915607	17	23	58	12	33	47	72	4	266	8	122	51	146	13	58	19	5	33	455	11	72	41	74	309	9	4	18	138	676	37	8	10	63	14	72	31	1	236	32	61	76	26	21	26	13	208	42	505	7
LOC116915608	60	80	281	71	291	466	354	34	1637	59	274	356	388	70	352	169	94	387	2149	78	236	103	196	2814	57	40	266	1791	5581	125	58	38	284	43	166	298	22	1034	307	130	288	98	74	144	305	2364	239	3949	29
LOC116915610	194	340	582	316	536	758	560	110	3396	222	884	552	792	217	798	534	221	1085	5305	297	468	381	577	5754	215	106	821	4430	13049	328	231	194	777	171	541	847	42	3131	540	398	665	346	95	326	613	6947	766	10696	98
LOC116915611	21	13	23	14	177	207	138	13	606	10	114	9	68	31	107	29	65	103	536	15	51	40	112	971	12	24	171	1507	2903	14	7	7	130	8	33	159	9	367	36	22	44	28	33	118	214	1774	100	2369	5
LOC116915612	3	28	51	15	62	80	73	3	315	8	78	57	95	15	87	59	13	91	503	27	54	23	69	618	12	5	54	300	1162	25	5	6	71	13	43	40	8	211	61	42	85	22	6	34	46	483	45	824	2
LOC116915613	0	0	2	0	2	1	5	5	15	0	2	8	4	1	3	4	0	6	28	0	1	0	3	20	0	0	8	33	65	1	0	1	4	0	1	9	0	16	2	1	3	1	2	2	5	33	3	52	0
LOC116915614	36	83	116	46	60	74	73	16	504	49	120	64	137	67	72	51	28	137	725	49	102	54	37	419	25	32	87	507	1312	98	84	24	71	37	89	101	5	509	60	112	137	53	85	73	86	676	131	1413	15
LOC116915615	21	39	50	53	100	105	149	19	536	20	190	55	138	64	145	106	40	211	969	16	67	37	90	880	35	43	129	897	2194	26	20	16	133	29	77	133	23	457	79	74	82	69	38	93	166	1260	159	2020	9
LOC116915616	39	62	135	86	187	236	233	44	1022	43	166	91	137	91	203	186	102	269	1288	32	99	66	130	1670	67	30	218	2185	4497	60	37	28	185	71	85	337	34	837	155	48	147	88	100	177	248	2926	300	4189	21
LOC116915617	36	43	67	56	173	199	224	19	817	21	178	79	165	16	172	83	56	241	1011	20	110	43	162	1407	30	9	125	881	2787	27	20	17	125	6	104	124	5	428	126	70	191	53	4	32	125	1376	65	2042	13
LOC116915618	35	166	311	67	152	221	158	22	1132	181	321	193	359	86	207	224	59	499	2129	128	253	124	123	2181	43	31	205	1461	4549	238	176	35	159	21	114	186	9	938	295	304	491	89	30	100	218	1775	327	3629	10
LOC116915620	1	9	5	4	11	10	9	1	50	0	19	3	10	0	4	1	0	8	45	4	8	5	3	54	0	1	3	32	110	8	1	0	6	2	4	4	5	30	7	9	17	5	2	5	6	59	4	114	4
LOC116915621	3	0	18	17	9	0	91	4	142	0	13	1	1	14	16	39	24	74	182	1	0	2	4	26	4	5	87	406	535	3	3	2	14	21	0	68	1	112	67	8	2	30	17	6	124	633	167	1054	3
LOC116915622	17	51	86	47	140	170	206	11	728	33	128	127	115	56	197	149	52	204	1061	28	89	52	133	1359	39	17	130	1102	2949	82	41	26	167	28	79	169	9	601	144	55	160	73	54	91	174	1680	124	2555	15
LOC116915623	1	4	13	0	1	0	8	0	27	3	12	4	36	3	2	21	5	71	157	12	18	2	1	257	1	3	3	31	328	4	5	1	2	3	8	9	2	34	34	11	13	13	0	1	13	56	14	155	0
LOC116915624	55	110	115	95	265	274	331	25	1270	57	356	102	201	73	201	165	103	319	1577	78	172	79	210	1641	70	39	277	1945	4511	52	39	21	180	51	137	258	16	754	129	84	160	127	47	160	276	2891	213	4087	23
LOC116915625	3	11	29	0	23	46	24	0	136	7	27	28	81	9	40	15	7	57	271	2	31	33	24	386	0	2	48	192	718	36	4	11	52	2	33	64	2	204	31	12	45	18	33	55	15	195	47	451	4
LOC116915627	305	854	1748	45	3	0	14	1	2970	414	482	26	1473	631	2	2737	519	1911	8195	415	790	423	3	4447	108	54	198	2762	9200	1081	1656	252	1	190	4	370	49	3603	1151	1174	1419	324	2	1	1888	3209	1585	10753	89
LOC116915628	0	0	11	4	3	2	7	1	28	0	3	7	7	5	12	6	3	15	58	2	5	1	4	20	3	6	11	52	104	1	3	0	6	3	8	11	0	32	3	4	2	12	6	6	10	92	42	177	1
LOC116915629	21	61	108	74	220	282	364	26	1156	30	230	208	302	55	331	233	88	371	1848	43	127	105	216	2847	51	39	358	2555	6341	104	19	8	304	33	166	309	23	966	202	94	245	116	66	248	314	3106	290	4681	6
LOC116915630	1	23	63	0	4	8	12	0	111	16	40	25	97	3	8	21	2	57	269	22	75	21	13	154	1	1	13	63	363	53	24	0	1	0	4	15	2	99	33	71	78	4	2	2	6	55	27	278	1
LOC116915631	32	21	298	138	148	37	353	7	1034	4	155	141	246	168	242	717	171	1313	3157	10	107	83	76	1435	85	38	1396	3366	6596	151	83	100	577	171	398	1087	34	2601	497	55	36	351	485	663	1042	6663	2447	12239	11
LOC116915632	19	33	66	32	144	123	183	20	620	18	137	60	175	33	111	74	43	201	852	34	90	44	96	1013	25	12	110	771	2195	64	24	11	122	26	88	109	12	456	97	81	106	47	24	56	127	1350	193	2081	18
LOC116915633	0	1	0	1	3	6	25	2	38	0	7	0	2	0	4	14	8	20	55	1	3	0	1	22	0	2	47	145	221	0	0	0	9	0	1	25	2	37	28	7	2	5	7	6	35	176	11	277	0
LOC116915634	2	0	9	0	11	0	111	0	133	0	10	1	37	0	7	67	18	55	195	0	24	6	1	404	0	1	45	286	767	4	2	1	4	0	3	28	3	45	30	11	9	1	6	8	51	275	61	452	0
LOC116915635	1	2	4	2	38	72	82	2	203	0	26	41	132	2	52	2	9	13	277	7	9	12	36	537	8	1	21	268	899	8	0	0	101	4	60	83	0	256	14	6	25	1	6	47	10	301	9	419	2
LOC116915636	2	40	100	56	127	115	101	8	549	5	110	38	86	44	79	89	39	118	608	15	132	32	80	889	14	27	101	713	2003	41	23	13	110	13	55	105	4	364	128	30	107	57	30	49	116	947	146	1610	3
LOC116915637	20	16	38	44	91	140	65	9	423	15	96	28	77	27	70	25	21	55	414	9	49	35	84	632	36	19	54	500	1418	22	6	16	87	16	44	72	5	268	43	17	62	28	39	54	79	633	53	1008	13
LOC116915638	51	108	172	95	255	373	284	27	1365	57	303	213	266	61	335	193	126	394	1948	103	168	117	220	2307	66	44	341	2496	5862	91	51	42	275	55	186	364	29	1093	187	156	287	99	29	202	341	3096	287	4684	27
LOC116915639	2	7	44	9	44	0	94	0	200	0	15	36	16	7	42	211	41	275	643	5	24	9	5	287	4	1	360	1219	1914	39	11	1	62	0	7	267	1	388	165	13	19	40	115	28	296	1338	504	2518	0
LOC116915640	42	133	190	134	551	666	608	37	2361	69	486	290	520	190	793	537	301	985	4171	66	218	208	472	4134	158	106	1079	6112	12553	204	60	70	703	152	307	813	59	2368	358	175	437	211	246	678	991	8520	875	12491	37
LOC116915641	0	0	30	3	7	0	40	2	82	0	3	7	52	2	62	9	13	158	306	0	21	14	11	276	8	9	173	346	858	7	7	1	209	5	81	216	1	527	17	1	0	18	39	157	59	487	139	917	0
LOC116915642	4	9	40	18	193	257	120	5	646	11	46	41	79	18	154	63	49	168	629	4	33	52	107	1570	21	4	208	1965	3964	22	16	8	167	22	40	240	1	516	119	15	52	12	42	194	266	1919	200	2819	8
LOC116915643	15	11	10	7	9	19	21	2	94	5	28	8	8	11	29	14	0	17	120	10	11	13	18	158	5	3	16	62	296	14	8	3	19	6	11	19	3	83	13	4	14	1	5	10	12	66	27	152	4
LOC116915644	24	65	165	61	138	292	109	7	861	56	210	94	183	61	208	139	72	239	1262	85	106	111	135	1655	52	10	164	1446	3764	110	59	23	146	50	112	198	7	705	109	95	170	40	64	146	183	1709	229	2745	14
LOC116915645	2	0	1	0	1	0	1	0	5	0	0	0	0	0	1	0	0	0	1	0	0	0	0	4	0	0	1	4	9	0	0	2	0	0	0	0	0	2	0	0	1	0	0	1	0	5	0	7	0
LOC116915646	8	18	27	19	89	120	117	4	402	10	67	30	62	12	79	62	36	110	468	8	35	35	65	632	18	12	118	857	1780	16	6	12	81	19	22	103	6	265	62	15	48	18	13	79	135	1150	90	1610	11
LOC116915647	0	22	14	18	34	62	81	3	234	2	33	20	53	11	47	54	29	61	310	5	22	9	24	349	7	6	49	458	929	12	10	1	37	3	24	60	2	149	30	34	42	33	9	20	62	608	35	873	6
LOC116915648	8	13	18	1	7	20	12	3	82	5	20	17	5	4	13	10	2	20	96	13	9	13	1	49	7	3	11	35	141	8	11	5	19	4	3	18	0	68	7	8	14	15	2	10	4	48	24	132	3
LOC116915649	13	7	196	7	58	155	46	15	497	7	70	677	582	31	280	190	20	166	2023	10	56	82	115	975	37	0	448	663	2386	108	31	9	335	41	158	194	8	884	48	162	275	30	82	118	141	1265	219	2340	1
LOC116915650	19	15	23	24	108	121	83	3	396	7	106	21	95	8	93	59	33	138	560	19	76	35	98	697	12	8	85	775	1805	7	2	7	71	2	52	88	11	240	68	29	48	30	3	34	107	963	76	1358	1
LOC116915651	0	0	0	0	1	1	0	0	2	0	0	17	1	0	0	0	0	0	18	7	1	1	1	0	0	0	3	0	13	1	0	0	0	0	1	0	0	2	7	10	0	0	0	3	3	3	3	29	2
LOC116915653	1	3	8	0	3	5	3	1	24	1	12	8	8	0	3	13	6	8	59	1	19	1	7	53	2	1	11	49	144	2	1	2	2	1	8	5	2	23	7	6	9	4	5	0	6	59	15	111	1
LOC116915654	29	46	151	63	71	98	175	14	647	49	144	130	165	77	131	170	51	267	1184	38	105	62	103	858	32	32	188	1037	2455	68	45	32	135	51	81	157	10	579	140	70	112	98	98	109	179	1615	234	2655	14
LOC116915655	1	2	2	2	12	21	10	0	50	0	10	4	12	0	15	5	3	12	61	0	0	6	6	139	4	1	9	84	249	3	7	0	11	0	5	10	2	38	5	2	6	0	1	4	15	169	5	207	3
LOC116915656	25	17	25	25	110	97	127	6	432	7	115	18	75	7	81	41	20	105	469	19	49	16	82	604	14	8	65	525	1382	18	3	6	67	7	43	72	4	220	42	25	61	33	0	42	93	673	50	1019	12
LOC116915657	49	72	87	71	509	448	585	15	1836	27	364	74	385	21	390	177	176	614	2228	63	248	112	508	4210	59	35	294	3058	8587	38	21	17	364	18	256	451	12	1177	321	103	291	80	13	150	439	3459	247	5103	19
LOC116915658	12	23	42	32	169	218	137	8	641	19	117	30	67	21	164	83	42	201	744	33	40	58	156	1478	38	26	124	1173	3126	25	12	10	162	14	77	202	7	509	117	24	82	27	12	103	147	1332	114	1958	0
LOC116915659	53	75	99	51	176	190	253	16	913	42	284	69	224	14	124	89	35	245	1126	87	177	43	203	1380	40	16	85	919	2950	40	17	15	148	16	130	137	10	513	113	101	121	80	23	68	136	1455	104	2201	27
LOC116915664	32	83	164	96	274	373	433	26	1481	38	232	120	284	85	362	260	149	556	2086	55	171	131	250	2851	68	32	467	3646	7671	118	68	20	296	59	179	471	28	1239	226	109	218	121	101	342	502	4099	365	6083	11
LOC116915666	403	190	207	390	820	840	1746	119	4715	98	2031	843	4038	149	443	21	35	28	7686	116	883	444	1009	4674	177	1	6	536	7846	222	34	87	483	108	1522	56	0	2512	425	433	1139	310	154	101	6	1139	17	3724	151
LOC116915667	0	0	1	0	2	7	5	0	15	1	6	3	20	1	4	0	0	3	38	0	5	0	6	27	2	0	2	2	44	0	0	0	3	1	8	0	3	15	2	1	6	3	0	0	0	9	1	22	0
LOC116915668	28	51	124	74	188	257	275	37	1034	30	181	127	319	82	307	142	66	359	1613	26	109	130	178	2082	43	15	210	1253	4046	117	43	32	286	57	197	218	21	971	192	88	256	84	81	115	214	2008	219	3257	15
LOC116915672	10	14	51	23	177	221	110	10	616	22	119	85	97	31	188	74	55	188	859	21	49	73	106	1532	23	11	161	1376	3352	47	18	16	190	16	79	226	12	604	102	24	90	17	38	111	157	1574	173	2286	11
LOC116915673	55	92	164	87	309	440	316	37	1500	48	278	130	363	108	384	206	119	528	2164	76	218	132	293	3505	77	42	399	2909	7651	173	73	47	427	50	182	397	18	1367	299	131	291	103	152	286	422	3752	395	5831	37
LOC116915674	49	164	401	231	1098	1451	913	69	4376	75	585	341	644	186	1190	594	440	1294	5349	117	386	433	945	9921	175	87	1313	10140	23517	315	117	104	1339	127	438	1630	31	4101	838	185	602	210	185	869	1340	13321	1264	18814	36
LOC116915675	15	31	67	55	158	212	91	15	644	8	92	46	94	42	170	107	64	171	794	5	65	75	144	1700	32	20	175	1271	3487	55	25	10	157	15	78	176	8	524	122	22	97	37	62	129	155	1715	189	2528	12
LOC116915676	79	200	419	254	1118	1005	1681	60	4816	87	1015	342	1001	197	1220	647	479	1827	6815	107	639	387	1022	9116	151	132	1720	11381	24655	231	100	46	1112	80	704	1704	38	4015	799	296	782	352	93	792	1602	13659	1277	19652	42
LOC116915677	15	48	50	23	112	196	98	9	551	16	99	105	128	31	147	99	34	143	802	17	79	47	89	1272	24	14	112	759	2413	54	6	13	139	14	57	118	3	404	162	35	145	52	34	127	148	1028	94	1825	7
LOC116915678	30	106	188	110	154	231	199	34	1052	34	189	123	181	94	217	189	81	316	1424	71	125	138	174	1642	54	58	239	1692	4193	127	60	23	227	38	121	235	12	843	215	107	201	95	89	158	229	2287	330	3711	7
LOC116915680	0	0	5	6	18	1	160	2	192	0	7	0	13	2	48	12	20	408	510	2	12	5	20	276	3	2	89	429	838	2	0	0	51	1	29	116	0	199	102	0	1	6	2	11	96	378	55	651	2
LOC116915682	25	24	95	76	72	121	107	7	527	21	173	31	535	59	105	405	41	993	2363	24	93	41	91	1029	25	39	628	842	2812	32	54	18	147	19	163	309	17	759	36	110	123	73	133	123	503	1224	631	2956	17
LOC116915685	0	0	3	0	1	1	1	0	6	0	1	0	1	0	0	0	0	2	4	0	3	0	0	15	0	0	1	2	21	1	0	0	1	0	2	2	0	6	3	2	5	0	0	2	0	11	2	25	0
LOC116915686	1	3	14	6	46	60	14	1	145	0	23	17	32	1	51	2	1	4	131	1	24	22	15	295	2	0	0	69	428	15	0	2	24	3	19	6	0	69	35	5	43	8	4	12	1	82	5	195	0
LOC116915687	5	6	61	5	51	103	47	1	279	3	74	95	100	14	51	66	15	35	453	12	67	35	34	543	9	11	36	284	1031	38	16	11	38	14	9	34	4	164	68	33	103	17	18	65	45	450	32	831	3
LOC116915689	9	23	49	9	111	220	47	0	468	5	89	95	208	7	169	16	6	33	628	5	105	106	74	1172	9	0	14	207	1692	43	7	5	145	6	146	27	0	379	103	26	198	25	26	62	5	203	21	669	3
LOC116915690	0	0	1	1	2	9	7	0	20	0	3	9	7	0	4	0	1	3	27	0	1	1	1	34	0	0	1	17	55	0	0	0	9	1	4	7	0	21	1	0	0	4	1	6	1	42	0	55	0
LOC116915692	0	0	0	0	1	2	0	0	3	0	0	2	5	0	0	2	0	1	10	0	0	0	3	5	0	0	2	0	10	0	0	0	1	0	0	1	0	2	2	1	0	0	1	0	0	5	0	9	0
LOC116915693	40	103	137	62	182	147	316	20	1007	63	354	113	270	30	202	145	63	344	1584	102	172	81	192	1678	59	22	163	1081	3550	47	43	28	165	19	163	142	11	618	172	146	233	109	17	72	179	1476	125	2529	16
LOC116915694	10	6	10	3	13	16	25	3	86	1	39	7	27	3	3	14	4	10	108	11	43	2	16	99	1	1	4	38	215	5	2	2	7	1	3	7	3	30	18	26	14	9	2	2	16	73	10	170	3
LOC116915695	0	0	0	0	0	0	1	0	1	0	0	0	0	1	1	1	0	0	3	0	0	0	0	1	0	0	0	3	4	0	0	0	0	0	0	0	0	0	0	0	0	0	0	0	0	7	0	7	0
LOC116915696	3	7	4	11	21	17	44	12	119	3	46	11	22	14	19	28	25	61	229	8	6	4	15	127	4	18	33	251	466	6	0	0	18	6	11	61	0	102	12	10	19	11	4	20	44	470	24	614	5
LOC116915697	11	112	384	107	394	999	234	19	2260	52	353	317	622	125	868	748	141	645	3871	74	333	337	362	5151	71	40	813	3556	10737	271	88	35	640	67	213	429	15	1758	472	145	503	190	532	973	615	4192	785	8407	2
LOC116915699	3	12	15	10	21	31	24	0	116	0	36	17	30	10	30	25	12	28	188	2	20	15	23	310	10	9	37	217	643	12	1	3	23	10	18	49	3	119	23	7	25	12	13	27	23	379	28	537	0
LOC116915700	2	1	2	2	13	5	23	0	48	2	13	5	2	8	10	7	4	15	66	5	3	2	2	67	3	9	8	108	207	1	1	1	4	1	1	26	3	38	2	4	9	8	1	7	14	128	27	200	0
LOC116915701	0	0	0	1	1	1	2	1	6	0	0	5	0	0	3	1	3	3	15	0	0	0	0	37	0	2	2	27	68	0	0	0	1	0	0	2	0	3	0	0	0	4	0	0	4	45	5	58	0
LOC116915702	0	1	2	0	0	1	0	0	4	0	1	0	0	0	0	1	0	0	2	0	0	0	0	0	0	0	2	1	3	0	0	0	2	0	0	0	0	2	2	0	0	0	0	0	0	3	1	6	0
LOC116915703	2	0	1	3	2	2	1	0	11	0	0	0	1	0	0	2	3	3	9	0	0	1	2	16	0	0	3	39	61	0	0	0	0	1	0	3	0	4	1	0	0	3	0	3	2	31	0	40	0
LOC116915706	6	16	25	14	89	81	95	0	326	2	81	7	54	18	38	35	22	72	329	20	49	21	66	427	5	8	42	288	926	16	5	3	46	9	33	44	6	162	46	14	46	27	2	11	41	359	49	595	4
LOC116915711	0	0	0	0	0	0	1	0	1	0	0	0	0	0	0	0	0	0	0	0	0	0	0	1	2	0	0	6	9	0	0	0	0	0	0	0	1	1	0	0	0	0	0	0	0	0	6	6	0
LOC116915714	0	0	1	0	0	2	2	0	5	0	0	0	0	0	2	0	0	0	2	0	3	1	0	4	0	0	0	1	9	1	0	0	0	0	1	0	0	2	4	0	0	1	0	0	0	1	1	7	1
LOC116915716	0	2	10	0	4	10	1	1	28	5	3	7	6	0	7	5	1	5	39	0	6	0	1	60	1	0	6	34	108	4	0	2	7	2	5	2	3	25	5	3	4	1	3	1	9	30	6	62	0
LOC116915718	0	2	2	2	0	1	0	0	7	0	2	0	2	0	2	3	0	3	12	1	2	3	0	2	0	0	1	2	11	2	0	0	0	0	0	1	6	9	1	0	1	1	1	0	2	4	1	11	0
LOC116915720	0	0	8	3	6	5	6	0	28	0	8	10	7	0	1	6	0	7	39	1	2	2	3	31	1	1	2	8	51	2	1	0	0	1	1	3	2	10	4	6	3	8	0	1	1	31	3	57	2
LOC116915724	0	0	0	2	0	0	0	0	2	0	1	0	0	0	1	0	0	0	2	0	0	0	0	0	0	0	0	4	4	0	0	0	0	0	0	0	0	0	0	0	0	0	0	0	0	0	0	0	0
LOC116915726	2	0	5	0	0	1	1	2	11	0	1	0	3	4	2	4	3	4	21	0	0	1	0	18	0	0	7	55	81	0	3	1	1	1	5	25	0	36	4	0	0	1	4	9	8	35	4	65	0
LOC116915730	0	0	0	0	0	0	0	0	0	0	0	0	0	0	0	0	0	0	0	0	0	0	0	1	0	0	2	0	3	0	1	0	0	0	0	0	1	2	0	0	0	0	0	0	0	0	0	0	0
LOC116915732	88	155	231	148	193	192	484	65	1556	91	478	265	514	99	239	222	63	439	2410	120	303	103	201	1925	122	81	242	1243	4340	81	83	70	252	62	329	216	38	1131	203	335	242	246	56	88	216	2089	222	3697	37
LOC116915733	48	68	409	556	137	143	496	138	1995	41	247	204	329	494	414	284	234	1739	3986	58	219	211	224	1642	141	350	2068	4559	9472	237	116	115	602	370	258	1061	150	2909	207	217	162	850	528	368	1020	8285	3161	14798	70
LOC116915734	266	766	2202	125	162	107	348	27	4003	344	527	402	1209	657	237	3952	610	2469	10407	404	895	508	74	10335	186	163	1303	6503	20371	991	1683	391	251	411	107	1162	117	5113	1369	700	1335	544	1205	267	2614	10171	2944	21149	159
LOC116915735	84	97	210	142	370	195	1345	34	2477	28	901	148	964	141	251	249	101	596	3379	68	589	126	529	2132	93	70	270	1429	5306	142	67	43	283	100	575	225	30	1465	219	283	391	238	37	101	233	2213	361	4076	25
LOC116915736	53	156	634	12	62	5	174	0	1096	16	115	89	153	50	7	913	100	359	1802	116	268	59	1	1428	32	4	170	1009	3087	61	273	66	16	102	3	113	12	646	445	121	187	130	43	5	545	2809	407	4692	23
LOC116915737	1	0	1	0	1	0	1	0	4	0	3	36	3	0	3	0	0	2	47	14	5	0	2	7	0	0	2	3	33	0	0	0	0	0	1	2	7	10	16	4	1	0	0	0	1	16	0	38	0
LOC116915738	3	11	37	8	20	36	12	0	127	6	27	26	38	8	21	29	6	34	195	6	15	10	7	234	6	3	19	147	447	16	22	3	20	2	10	20	1	94	36	17	29	5	0	16	27	173	26	329	2
LOC116915739	0	1	0	0	0	1	1	0	3	2	2	1	1	0	1	2	0	0	9	5	0	0	0	8	1	1	1	8	24	1	3	0	2	1	0	4	0	11	6	3	1	1	2	4	1	21	3	42	1
LOC116915740	24	24	80	42	140	167	95	8	580	5	72	46	113	48	109	55	27	144	619	16	63	49	78	1119	39	27	121	910	2422	41	14	24	112	25	77	129	12	434	79	34	68	52	36	70	127	1010	139	1615	13
LOC116915741	175	175	957	754	213	5	1281	177	3737	114	745	315	340	610	469	1363	548	4306	8810	226	416	315	206	1950	255	572	3273	6970	14183	251	424	338	669	643	418	1851	174	4768	628	607	190	1676	609	274	1821	13881	4495	24181	85
LOC116915742	30	79	225	115	615	710	410	41	2225	45	320	122	397	78	476	302	214	797	2751	44	229	188	485	4861	76	77	474	4142	10576	120	36	22	514	45	249	644	37	1667	432	78	272	157	21	203	562	5570	604	7899	20
LOC116915743	47	123	290	141	750	949	459	48	2807	36	379	166	359	80	592	433	308	983	3336	64	276	269	513	6559	103	107	755	5761	14407	162	67	33	614	49	295	842	22	2084	528	101	445	135	21	260	774	7497	822	10583	45
LOC116915744	2	4	2	5	0	4	3	0	20	0	3	4	2	2	19	8	3	12	53	0	2	1	1	36	2	0	12	46	100	3	3	3	5	0	1	10	2	27	4	0	4	0	0	7	9	77	10	111	0
LOC116915746	2	3	7	7	12	6	15	1	53	1	11	2	4	0	5	3	4	11	41	2	4	2	7	52	3	4	5	29	108	5	2	0	6	0	6	3	2	24	12	3	10	8	0	0	4	37	1	75	2
LOC116915747	0	1	2	4	7	10	4	1	29	0	3	0	2	2	4	3	4	9	27	0	3	1	2	35	1	1	11	38	92	2	0	0	2	0	0	1	0	5	4	0	6	3	3	8	11	40	4	79	0
LOC116915748	0	11	17	4	6	16	21	3	78	3	21	12	19	5	25	20	8	33	146	6	11	17	23	161	2	0	12	115	347	6	19	7	27	0	13	33	0	105	18	18	46	7	7	13	23	207	29	368	0
LOC116915750	1	2	6	0	2	3	6	2	22	0	5	4	17	1	4	19	1	11	62	0	12	5	1	98	1	0	2	28	147	5	1	0	0	0	0	6	0	12	20	6	10	1	0	2	10	59	5	113	0
LOC116915751	1	0	0	0	0	0	0	0	1	0	1	0	2	0	1	1	0	1	6	0	0	0	0	1	1	0	3	4	9	1	0	0	0	0	0	0	0	1	0	1	0	0	0	0	1	5	0	7	1
LOC116915752	1	1	0	5	3	3	7	0	20	0	3	0	12	1	3	5	1	2	27	3	2	1	2	20	1	0	3	41	73	0	0	1	3	0	1	2	2	9	1	1	1	0	1	3	6	55	2	70	0
LOC116915753	0	7	8	4	13	22	36	8	98	0	14	5	8	6	34	26	15	48	156	0	6	11	16	104	6	9	45	277	474	7	0	3	24	12	8	49	1	104	12	4	14	12	9	28	42	417	31	569	0
LOC116915754	29	38	95	41	197	227	246	33	906	31	155	85	181	54	210	101	60	247	1124	40	106	95	181	1724	45	20	182	1159	3552	79	32	26	196	33	105	200	7	678	145	72	183	96	37	83	201	2113	175	3105	12
LOC116915756	3	5	2	0	1	0	1	0	12	1	0	6	2	1	4	2	0	6	22	2	2	2	2	10	5	1	2	12	38	1	2	2	4	0	1	1	0	11	0	0	4	3	0	2	0	10	0	19	1
LOC116915757	0	1	0	0	1	2	0	0	4	0	0	2	6	1	0	0	0	3	12	0	2	0	1	11	0	0	0	6	20	1	0	1	2	0	1	1	0	6	0	2	1	0	0	4	2	4	0	13	0
LOC116915759	36	78	122	25	19	3	102	1	386	36	80	24	100	14	12	181	46	167	660	73	79	28	12	749	5	9	56	412	1423	26	120	19	20	1	7	70	1	264	91	176	137	72	3	4	108	671	88	1350	11
LOC116915761	53	99	132	65	176	291	99	35	950	40	192	101	176	154	228	131	45	261	1328	45	105	128	133	1684	143	51	233	1513	4035	109	49	77	262	71	119	226	20	933	138	90	182	51	151	243	211	1957	342	3365	29
LOC116915762	10	6	1	11	53	66	17	2	166	1	14	5	10	2	25	12	9	45	123	4	6	15	26	477	1	2	39	276	846	4	3	0	40	0	14	45	2	108	34	3	11	2	8	35	37	266	42	438	1
LOC116915763	171	453	897	406	897	1532	814	139	5309	183	921	1012	1167	395	1767	1113	334	2106	8998	338	798	715	947	10378	327	222	1801	8313	23839	657	240	168	1528	160	816	1424	59	5052	1211	651	1367	460	675	1243	1551	10501	1984	19643	108
LOC116915764	12	45	87	46	132	165	147	24	658	23	159	109	151	25	138	100	44	218	967	37	79	59	121	1237	25	16	124	911	2609	46	25	14	138	15	77	165	3	483	106	75	138	36	14	56	131	1233	120	1909	10
LOC116915765	25	101	250	71	306	476	178	13	1420	51	242	224	280	84	325	302	126	340	1974	81	227	119	180	2959	45	16	347	2201	6175	164	75	53	315	53	120	407	18	1205	348	119	296	110	118	341	366	2687	341	4726	32
LOC116915766	30	82	207	97	501	355	636	38	1946	22	328	118	672	80	288	260	129	883	2780	54	386	158	507	3640	74	50	241	1593	6703	103	54	36	310	39	472	368	19	1401	368	70	314	182	55	103	284	2605	404	4385	19
LOC116915767	20	54	65	35	81	94	134	9	492	26	149	59	123	26	86	62	34	135	700	52	99	49	66	714	31	7	75	618	1711	44	35	17	65	24	54	81	7	327	74	69	78	36	35	46	89	908	113	1448	13
LOC116915768	0	0	3	1	1	0	0	1	6	0	0	0	0	0	0	0	0	0	0	0	1	0	0	5	0	2	0	0	8	0	0	0	0	1	0	0	0	1	0	0	3	0	0	0	0	1	0	4	0
LOC116915769	59	215	366	232	394	592	393	51	2302	88	457	312	506	184	573	432	170	907	3629	105	384	279	373	4947	133	47	755	3357	10380	295	169	77	548	125	354	493	36	2097	509	245	599	186	440	526	704	4597	786	8592	42
LOC116915771	25	31	34	40	341	419	255	12	1157	14	172	24	112	26	229	86	95	238	996	12	72	95	189	1880	23	29	391	3832	6523	26	16	6	202	11	46	418	14	739	104	28	89	27	68	348	549	4014	203	5430	13
LOC116915772	56	100	162	113	220	223	251	29	1154	39	302	109	275	68	308	140	61	304	1606	64	149	113	208	1973	63	29	195	1233	4027	91	39	28	248	50	170	185	17	828	156	71	194	83	50	143	205	2053	232	3187	39
LOC116915773	37	63	125	55	197	307	175	27	986	24	198	278	235	93	246	155	44	177	1450	32	83	105	131	1606	71	36	163	1269	3496	81	44	31	298	54	146	181	20	855	150	120	204	57	208	237	143	1638	226	2983	19
LOC116915774	602	1096	2361	1405	7748	7887	9828	522	31449	552	5802	1699	4774	1054	5772	3585	2517	9107	34862	720	3512	2328	6727	50270	872	875	6173	45066	116543	1680	534	473	6059	560	3161	7932	193	20592	4407	1514	4917	1966	804	2765	5867	64294	7394	93928	334
LOC116915776	45	99	231	112	472	440	397	32	1828	32	356	138	407	62	359	219	140	545	2258	68	224	168	405	3423	57	27	254	1889	6515	85	37	29	330	15	218	340	11	1065	356	119	339	121	28	91	286	2930	327	4597	28
LOC116915777	16	43	49	25	50	98	48	15	344	22	88	59	102	46	68	56	13	76	530	29	69	35	62	440	27	9	49	430	1150	19	30	45	70	17	54	76	9	320	73	55	84	20	111	75	69	553	74	1114	10
LOC116915778	28	101	233	111	279	376	318	45	1491	60	362	172	347	98	401	225	98	424	2187	51	169	184	270	2631	80	74	313	2481	6253	125	35	30	331	48	192	332	14	1107	250	80	299	119	86	200	332	3277	360	5003	21
LOC116915779	4	4	4	2	5	8	6	2	35	0	13	16	37	1	5	7	0	13	92	5	6	2	3	39	2	1	10	21	89	4	3	2	12	0	7	8	0	36	5	12	10	2	2	1	3	35	13	83	2
LOC116915780	0	0	0	0	0	1	1	0	2	3	0	0	0	0	1	0	0	0	4	0	0	0	1	0	0	0	0	0	1	0	0	0	0	1	0	1	0	2	0	0	1	1	0	0	1	1	0	4	0
LOC116915781	29	80	121	61	265	351	232	34	1173	42	214	171	226	27	303	142	101	301	1527	36	133	124	209	2575	50	20	285	2242	5674	90	58	23	223	28	131	306	7	866	248	64	201	90	29	155	330	2584	243	3944	22
LOC116915782	41	55	55	31	116	109	177	8	592	18	199	55	164	8	95	52	28	132	751	44	113	32	115	893	21	10	74	471	1773	28	18	13	107	4	94	109	5	378	81	76	91	42	9	45	77	782	67	1270	10
LOC116915783	36	43	60	25	52	62	79	9	366	8	88	31	143	41	51	55	23	128	568	50	105	26	47	600	17	36	75	619	1575	38	24	19	49	8	37	104	6	285	61	35	54	22	12	61	92	654	100	1091	12
LOC116915784	27	49	126	63	285	301	278	13	1142	39	219	121	228	41	266	119	109	372	1514	48	93	103	206	1990	49	26	255	1783	4553	58	23	15	222	39	144	310	12	823	168	53	181	77	51	132	249	2841	271	4023	9
LOC116915786	27	17	26	18	83	53	98	6	328	2	177	12	87	4	48	24	18	70	442	22	55	20	78	472	10	2	35	267	961	13	2	1	39	6	56	39	5	161	34	49	43	28	3	22	64	335	20	598	8
LOC116915787	8	17	27	22	78	76	92	6	326	4	44	28	41	16	83	71	40	123	450	5	17	23	85	652	15	9	103	1082	1991	17	8	13	96	16	30	129	5	314	53	11	40	31	6	64	104	1421	101	1831	1
LOC116915788	10	21	110	42	359	378	353	12	1285	5	149	86	303	15	314	205	152	417	1646	22	131	79	305	3218	34	28	309	2993	7119	43	19	12	310	7	126	360	14	891	250	60	181	42	23	173	376	4097	256	5458	6
LOC116915789	3	3	1	1	1	8	2	0	19	0	6	5	1	0	0	2	0	4	18	0	2	0	3	32	1	0	3	7	48	6	1	2	6	1	1	3	1	21	5	2	2	2	1	8	5	22	2	49	3
LOC116915790	7	10	11	8	17	23	11	2	89	3	46	8	32	3	23	4	2	12	133	9	23	5	17	126	7	0	10	44	241	7	0	1	14	1	12	18	0	53	7	10	14	11	0	1	16	72	9	140	1
LOC116915792	0	1	3	1	7	2	1	0	15	0	1	4	4	2	4	5	1	2	23	0	0	2	2	21	0	0	3	8	36	0	0	0	1	0	0	3	2	6	2	0	5	0	0	3	3	23	4	40	0
LOC116915805	31	59	124	55	120	169	114	21	693	25	166	127	187	50	209	134	39	207	1144	35	106	103	133	1216	42	12	143	988	2778	76	44	26	149	31	106	122	10	564	125	73	136	56	54	109	118	1401	173	2245	7
LOC116915806	8	17	24	16	56	49	92	3	265	9	104	17	58	0	48	26	20	83	365	17	33	19	67	386	7	5	23	284	841	4	1	1	40	1	40	37	1	125	23	20	39	10	0	9	60	356	19	536	3
LOC116915807	26	52	58	3	7	6	17	2	171	20	110	16	123	10	9	40	4	50	382	49	134	11	19	209	4	1	12	49	488	23	39	15	1	1	6	13	9	107	43	172	97	8	0	0	27	38	13	398	7
LOC116915808	53	115	219	96	246	270	273	44	1316	70	446	226	392	29	354	160	54	390	2121	101	262	151	302	2389	74	29	196	932	4436	122	65	34	261	33	267	202	15	999	242	250	383	158	20	70	156	1624	209	3112	13
LOC116915809	1	0	2	0	2	3	4	0	12	0	2	2	6	1	2	2	0	3	18	0	6	1	1	14	0	0	1	4	27	1	0	3	2	0	0	4	1	11	3	0	3	0	0	2	1	9	1	19	0
LOC116915810	43	133	263	125	408	697	511	38	2218	62	379	396	499	143	622	308	135	593	3137	105	198	255	346	4379	110	34	490	3598	9515	282	79	59	516	74	216	466	40	1732	353	154	449	114	227	400	496	4462	535	7190	28
LOC116915811	10	19	22	14	30	29	67	3	194	7	78	51	93	8	49	19	13	62	380	12	51	26	37	314	4	4	26	190	664	23	12	6	38	10	48	41	7	185	26	40	77	23	4	17	23	293	44	547	5
LOC116915812	62	89	129	125	868	754	1092	39	3158	36	475	116	754	50	593	246	201	741	3212	71	283	171	820	6227	63	22	319	3475	11451	73	34	32	527	32	394	441	9	1542	350	100	369	135	23	141	441	3681	220	5460	30
LOC116915813	10	19	33	23	60	94	89	6	334	16	74	36	65	20	114	68	35	119	547	10	32	40	44	814	12	8	115	698	1773	22	9	4	85	6	32	104	1	263	66	16	64	29	22	55	84	795	112	1243	2
LOC116915814	0	9	12	3	14	30	15	2	85	3	23	6	17	2	29	11	7	51	149	7	27	6	14	180	3	4	17	119	377	4	6	1	13	5	10	18	3	60	26	7	20	3	4	4	15	152	15	246	0
LOC116915815	21	21	35	42	165	264	122	12	682	7	113	33	71	58	176	97	67	164	786	30	53	53	136	1307	43	46	155	1297	3120	31	13	13	139	44	76	186	18	520	86	18	96	48	43	148	259	1927	139	2764	9
LOC116915816	5	16	34	13	27	51	31	2	179	5	36	22	36	16	63	45	12	76	311	11	25	19	24	291	4	3	43	287	707	23	9	7	52	7	19	50	3	170	34	13	27	19	36	43	46	528	63	809	0
LOC116915818	0	0	2	0	3	3	3	0	11	0	1	3	5	1	3	1	0	3	17	0	4	0	0	29	1	0	10	15	59	1	0	0	1	3	1	5	0	11	3	0	3	6	5	4	5	25	5	56	0
LOC116915822	2	7	3	1	16	12	31	0	72	3	16	6	17	2	7	9	3	20	83	3	7	6	17	107	5	0	10	61	216	1	0	0	11	0	6	6	0	24	12	7	7	5	1	0	7	103	4	146	3
LOC116915824	6	7	11	10	17	21	55	4	131	5	37	25	39	4	33	23	14	44	224	6	16	11	29	255	2	2	46	269	636	9	6	2	22	5	14	33	2	93	34	16	26	8	16	17	41	241	35	434	4
LOC116915825	1	51	57	1	7	4	10	4	135	55	59	5	70	2	6	35	32	118	382	24	45	10	6	136	4	3	11	108	347	50	34	3	1	3	7	20	2	120	41	98	115	4	0	4	39	94	53	448	10
LOC116915826	0	3	987	1403	50	0	867	374	3684	2	47	368	1347	1440	911	66	392	3763	8336	0	630	528	255	4739	422	693	3364	8721	19352	414	116	312	2564	1328	1959	2806	392	9891	58	137	4	2284	2896	2248	1625	19775	4936	33963	27
LOC116915827	2	0	7	10	1	0	124	2	146	0	3	0	40	3	4	1	2	29	82	0	21	5	11	16	1	3	16	33	106	3	0	0	13	0	61	12	1	90	0	16	0	35	0	2	5	60	8	126	0
LOC116915828	0	0	30	33	2	0	20	21	106	0	4	11	3	37	2	0	4	47	108	0	28	11	5	80	4	10	30	38	206	10	2	3	17	13	19	22	7	93	4	1	0	46	4	2	13	104	74	248	0
LOC116915829	0	0	0	3	0	0	0	0	3	0	2	0	0	0	0	0	0	7	9	0	0	0	0	7	0	0	2	10	19	1	0	0	2	0	0	2	0	5	0	1	0	0	0	0	1	6	1	9	0
LOC116915830	0	0	0	0	0	0	13	0	13	0	0	0	1	0	0	0	3	3	7	0	0	0	1	10	1	0	8	34	54	0	0	0	1	0	0	4	0	5	1	1	0	0	3	6	3	31	4	49	0
LOC116915831	9	23	29	9	14	33	10	5	132	3	66	12	22	5	21	11	3	12	155	25	48	17	20	154	14	6	13	62	359	14	3	14	15	8	10	14	0	78	10	17	23	16	0	6	9	135	16	232	5
LOC116915833	1	3	2	1	1	1	2	0	11	0	3	4	4	0	1	1	0	4	17	2	1	1	1	20	2	0	0	3	30	1	1	1	2	0	2	0	0	7	3	6	5	0	0	0	0	1	1	16	1
LOC116915835	1	8	27	5	9	43	5	0	98	4	26	61	26	8	28	22	4	26	205	10	27	23	15	184	3	0	24	60	346	22	15	6	25	4	18	10	2	102	17	32	47	16	27	29	19	81	25	293	7
LOC116915836	0	1	7	0	36	68	7	2	121	3	24	25	35	1	10	30	4	12	144	1	17	20	18	280	0	1	31	77	445	20	0	0	18	0	5	21	1	65	26	1	32	7	14	53	25	124	14	296	0
LOC116915837	103	147	195	125	410	466	379	66	1891	134	411	214	415	74	417	241	108	464	2478	103	180	211	371	3140	133	45	264	2376	6823	119	63	51	326	55	273	416	23	1326	214	159	352	149	44	114	295	3770	200	5297	65
LOC116915838	0	0	4	0	23	18	10	0	55	1	16	4	26	1	17	9	7	20	101	1	9	7	16	148	5	0	18	79	283	6	1	0	12	1	6	12	0	38	20	2	11	5	5	14	19	113	13	202	0
LOC116915840	2	0	1	0	0	0	8	0	11	0	0	0	0	0	0	0	1	0	1	1	0	0	0	2	0	2	1	18	24	0	0	0	0	1	0	1	0	2	0	0	0	0	0	0	1	17	0	18	0
LOC116915841	65	169	389	147	631	944	486	59	2890	117	455	322	499	175	926	391	256	806	3947	134	262	315	588	7237	160	53	979	7004	16732	308	113	99	770	127	249	1045	27	2738	510	153	403	161	220	638	992	7838	921	11836	48
LOC116915842	0	0	0	0	0	0	1	0	1	0	0	0	0	0	0	0	1	0	1	0	0	0	0	1	0	0	1	21	23	0	0	0	1	0	0	5	1	7	0	0	0	1	0	0	1	9	1	12	0
LOC116915843	2	2	0	0	0	0	0	0	4	0	0	0	1	1	0	0	0	1	3	2	2	0	0	1	0	1	0	4	10	0	0	0	0	0	0	0	1	1	0	0	0	0	0	1	1	2	0	4	0
LOC116915846	0	1	4	1	11	14	7	0	38	0	7	6	7	2	14	7	6	23	72	4	6	5	7	101	1	0	14	72	210	8	5	0	13	0	5	8	2	41	16	5	14	7	2	13	10	87	13	167	2
LOC116915847	41	100	123	137	201	246	246	76	1170	37	227	275	177	132	242	222	115	307	1734	65	100	87	152	1863	124	95	312	2217	5015	93	44	45	189	92	103	316	47	929	150	119	225	122	81	195	305	3138	236	4571	28
LOC116915848	0	0	0	0	1	1	1	0	3	0	0	0	0	0	1	1	0	1	3	0	0	0	0	13	0	0	1	5	19	0	1	0	1	0	0	1	0	3	1	0	0	0	0	1	4	17	2	25	0
LOC116915850	382	283	358	247	2170	1159	7564	64	12227	102	2947	170	2790	57	823	406	457	2155	9907	344	1625	357	2864	9392	119	87	750	5409	20947	110	66	55	859	56	1379	1096	26	3647	687	781	1078	435	20	177	962	7882	529	12551	55
LOC116915851	52	55	220	94	732	991	834	31	3009	45	538	106	861	83	764	234	186	646	3463	43	414	318	825	5564	76	16	280	2374	9910	133	46	60	633	41	922	384	12	2231	883	147	612	240	78	110	239	4751	238	7298	55
LOC116915852	56	65	180	81	880	1019	1166	22	3469	20	675	101	1074	40	773	319	286	953	4241	62	588	228	992	8163	39	27	746	6473	17318	80	18	14	772	11	530	823	13	2261	604	181	400	125	77	530	955	7820	612	11304	19
LOC116915853	10	31	41	48	56	74	75	25	360	17	70	31	53	38	100	145	58	206	718	29	27	17	38	528	30	84	262	1073	2088	30	13	9	82	20	47	223	23	447	47	34	60	43	41	124	193	1561	182	2285	2
LOC116915854	0	6	0	1	5	3	9	0	24	0	1	3	0	1	2	4	8	8	27	0	5	0	3	7	1	0	5	58	79	0	1	0	1	0	0	7	2	11	0	0	2	2	4	6	10	85	2	111	3
LOC116915855	2	0	0	2	4	3	2	0	13	3	4	4	3	0	0	1	1	3	19	1	1	0	1	30	0	0	4	6	43	0	1	0	4	0	0	1	0	6	4	12	5	1	0	2	2	32	0	58	0
LOC116915856	102	204	375	180	338	413	314	58	1984	105	408	185	436	112	323	208	121	537	2435	161	332	180	334	2835	138	72	309	2381	6742	229	108	100	336	61	188	354	21	1397	277	168	373	203	52	140	371	3558	364	5506	61
LOC116915857	128	202	594	302	504	415	1680	97	3922	310	922	650	1590	312	1194	865	518	2463	8824	336	459	440	1267	5776	224	157	1467	9039	19165	562	470	215	1902	237	1569	2113	60	7128	390	1133	1148	857	241	803	1533	13131	2311	21547	42
LOC116915858	9	28	57	17	299	481	775	9	1675	2	97	30	225	21	120	104	66	293	958	26	95	50	118	3395	26	4	162	1684	5560	56	26	3	128	7	149	227	8	604	388	15	135	52	74	107	159	1843	321	3094	4
LOC116915859	17	23	44	32	61	70	107	8	362	16	95	36	84	13	50	29	17	62	402	32	42	32	67	407	13	5	45	254	897	23	10	13	54	9	73	46	3	231	56	48	72	19	28	20	44	448	38	773	11
LOC116915860	0	0	0	0	1	0	0	0	1	0	0	0	1	0	0	0	0	0	1	0	2	0	0	11	0	0	0	0	13	1	0	0	0	1	2	0	0	4	0	0	0	0	0	1	0	1	0	2	0
LOC116915861	3	12	78	16	117	115	131	1	473	6	239	47	403	2	90	64	18	51	920	2	327	57	177	530	1	0	16	103	1213	34	10	3	64	2	95	24	0	232	125	60	231	34	2	7	20	368	9	856	0
LOC116915862	2	6	6	2	27	36	58	0	137	1	23	12	60	6	15	3	2	9	131	0	24	10	11	104	3	1	6	27	186	8	1	1	11	7	21	3	0	52	6	5	36	7	6	4	2	38	4	108	4
LOC116915864	19	115	573	151	2344	2196	3481	13	8892	9	1073	335	2924	63	1828	1271	481	2358	10342	40	1420	369	1777	20908	50	32	1898	7831	34325	376	48	6	2047	20	1050	1145	21	4713	1858	157	1371	394	136	1015	1317	10961	1461	18670	16
LOC116915865	2	4	12	1	2	2	1	0	24	1	3	1	11	2	0	2	0	6	26	0	4	4	3	7	0	0	0	21	39	2	0	0	0	2	0	9	0	13	8	2	2	0	0	1	0	20	2	35	0
LOC116915866	0	0	3	0	2	1	4	0	10	0	3	5	7	0	3	1	0	3	22	0	3	0	0	11	0	0	2	8	24	2	0	0	1	0	0	3	0	6	6	2	5	0	0	0	2	17	4	36	0
LOC116915869	0	1	8	0	15	29	21	1	75	0	19	6	58	0	22	3	0	7	115	0	7	5	21	177	1	0	0	21	232	6	1	0	4	0	4	17	0	32	6	1	14	2	4	7	1	20	2	57	0
LOC116915870	31	91	117	96	244	235	227	21	1062	31	177	95	255	81	250	157	84	328	1458	78	125	97	213	2360	73	67	290	1976	5279	90	45	36	269	40	150	337	23	990	195	93	187	97	50	216	242	2469	259	3808	29
LOC116915871	44	155	343	196	657	845	564	62	2866	66	466	236	505	142	731	600	304	819	3869	103	349	333	496	5743	135	97	691	5975	13922	212	74	49	617	71	427	776	38	2264	485	128	485	187	42	245	672	7526	675	10445	31
LOC116915872	1	6	10	0	17	7	112	2	155	1	39	8	103	1	13	12	6	45	228	7	45	6	25	102	0	4	9	66	264	6	1	0	6	1	21	15	0	50	23	23	25	11	0	5	8	110	5	210	0
LOC116915873	0	4	1	1	0	2	9	0	17	0	5	5	4	0	2	3	0	5	24	1	2	1	2	23	0	0	0	5	34	1	0	0	6	0	4	4	0	15	2	10	16	0	0	2	2	7	5	44	0
LOC116915874	24	55	73	41	137	172	96	32	630	9	172	51	121	31	104	49	29	159	725	24	73	54	115	1087	39	18	88	822	2320	33	26	22	113	16	69	109	7	395	78	39	82	82	13	53	117	1060	88	1612	20
LOC116915875	2	10	21	16	82	83	46	6	266	0	36	9	44	7	55	46	31	131	359	4	19	7	52	763	6	3	97	459	1410	19	2	0	76	6	38	83	6	230	30	5	25	24	32	53	96	557	106	928	1
LOC116915876	1	0	2	3	27	28	159	0	220	0	11	7	10	0	26	15	16	13	98	0	1	5	21	278	1	0	26	559	891	0	1	0	25	0	12	30	0	68	30	0	6	5	3	11	26	893	17	991	0
LOC116915877	58	99	220	118	364	382	381	27	1649	55	430	131	388	29	340	165	120	407	2065	68	239	149	379	2943	54	15	260	1839	5946	112	42	40	384	24	231	334	19	1186	220	112	318	99	27	104	310	2534	270	3994	26
LOC116915878	2	3	39	0	20	18	8	0	90	0	25	7	94	0	19	22	5	8	180	0	114	16	29	152	1	0	0	15	327	23	8	1	10	1	10	1	0	54	37	24	78	6	1	4	4	19	5	178	0
LOC116915879	21	38	95	64	243	352	190	13	1016	19	147	58	144	65	267	171	99	293	1263	21	84	98	200	2196	51	18	274	2058	5000	64	18	23	238	32	112	282	9	778	183	25	134	47	55	189	270	2926	351	4180	13
LOC116915880	36	104	408	42	166	314	27	18	1115	38	246	172	294	103	245	28	5	111	1242	19	411	285	175	2268	63	0	27	260	3508	288	38	16	225	50	231	51	0	899	284	95	345	61	161	86	32	274	105	1443	27
LOC116915881	140	452	1581	121	475	580	121	34	3504	186	1183	526	2301	182	724	282	54	860	6298	126	1350	544	832	6184	121	1	90	962	10210	1026	319	61	469	67	747	153	3	2845	964	556	2124	148	44	63	152	764	458	5273	61
LOC116915882	20	37	61	52	206	307	140	16	839	19	139	63	169	34	241	132	82	304	1183	18	61	95	177	1994	56	57	216	1910	4584	47	9	21	230	19	83	334	17	760	160	26	104	52	27	110	248	2674	258	3659	3
LOC116915884	59	869	350	1237	1776	1423	2310	586	8610	100	2460	274	651	1091	2167	2245	1038	3573	13599	392	504	296	1079	9170	895	1100	2653	15556	31645	266	128	59	1912	732	286	2383	795	6561	860	514	955	1427	160	1176	2673	28014	2238	38017	94
LOC116915885	5	53	386	9	67	98	74	4	696	35	241	39	860	16	105	103	12	259	1670	29	368	169	180	931	7	2	27	615	2328	353	43	2	50	1	53	97	0	599	258	91	307	20	1	6	83	265	160	1191	8
LOC116915886	45	115	349	51	185	249	47	22	1063	44	364	218	350	90	352	20	11	148	1597	58	382	198	290	3055	59	0	19	284	4345	208	38	24	308	57	294	86	2	1017	250	136	367	36	86	56	23	277	104	1335	22
LOC116915887	42	114	615	37	293	453	90	12	1656	79	539	348	1268	78	557	143	34	539	3585	66	666	405	482	4842	68	0	56	946	7531	567	53	15	537	29	464	123	1	1789	608	153	804	41	103	85	87	754	330	2965	21
LOC116915888	1	9	110	3	1	7	4	0	135	14	91	19	337	4	10	57	6	156	694	6	78	28	8	68	2	0	15	275	480	110	11	3	8	0	16	16	0	164	101	30	105	0	2	3	37	45	95	418	0
LOC116915889	4	14	53	18	67	102	77	13	348	12	53	62	75	23	118	82	18	132	575	12	29	45	45	924	9	3	146	839	2052	43	17	9	101	13	53	151	6	393	74	10	54	22	66	107	109	865	159	1466	6
LOC116915890	15	42	78	18	52	51	11	3	270	16	83	57	77	14	67	5	1	41	361	4	95	69	55	481	22	0	6	57	789	50	11	9	55	10	72	10	0	217	43	33	140	12	12	13	11	75	25	364	11
LOC116915892	0	16	1	14	22	13	69	10	145	3	55	8	14	8	31	21	19	53	212	17	7	6	14	95	10	19	38	307	513	6	1	0	32	6	6	26	6	83	10	7	26	12	1	24	38	407	25	550	1
LOC116915894	0	0	0	0	5	1	1	2	9	0	2	0	0	1	3	1	0	4	11	0	2	0	0	5	0	3	0	5	15	0	0	2	0	0	0	0	2	4	1	0	0	0	0	0	0	5	0	6	0
LOC116915895	0	0	0	0	0	1	2	0	3	0	2	1	0	0	1	1	1	1	7	0	0	1	0	11	0	0	3	13	28	0	0	0	3	0	1	4	0	8	1	0	0	3	0	7	3	5	1	20	0
LOC116915896	1	8	11	6	230	314	153	3	726	7	267	49	382	4	22	145	17	22	915	5	249	33	177	1919	3	4	49	151	2590	7	9	0	84	0	7	22	10	139	205	22	136	22	0	31	46	326	10	798	1
LOC116915897	13	18	50	50	152	185	344	10	822	15	125	94	174	23	202	117	61	283	1094	28	70	59	137	1457	7	8	277	1388	3431	40	16	3	180	22	97	191	11	560	135	65	155	38	15	112	212	1801	163	2696	7
LOC116915899	9	43	41	44	82	121	129	19	488	21	157	94	118	42	174	181	44	169	1000	21	51	34	89	844	43	23	156	755	2016	42	25	7	177	41	70	118	23	503	78	52	112	56	42	98	133	1261	116	1948	7
LOC116915900	15	87	387	33	146	372	102	6	1148	41	502	176	728	31	566	105	24	229	2402	50	430	281	421	3621	34	4	60	683	5584	259	54	15	267	17	147	156	4	919	320	189	643	56	51	71	42	575	119	2066	7
LOC116915901	73	204	402	84	105	84	117	37	1106	89	310	227	255	60	125	623	102	408	2199	207	311	92	123	2765	68	38	126	849	4579	94	158	58	105	58	118	195	11	797	274	183	247	118	10	47	327	1384	200	2790	41
LOC116915902	120	54	98	114	973	868	1089	37	3353	30	697	67	455	50	510	274	295	678	3056	82	325	158	837	5391	54	23	604	4923	12397	56	16	22	597	47	232	794	24	1788	377	83	291	144	7	158	861	7326	376	9623	50
LOC116915903	9	26	36	27	160	207	164	16	645	15	90	45	100	20	155	90	58	206	779	12	54	43	147	1533	20	10	164	1566	3549	37	6	9	152	18	51	173	7	453	108	28	90	22	12	88	192	1798	133	2471	6
LOC116915904	9	22	17	32	92	94	73	7	346	1	109	8	68	11	67	45	30	74	413	2	47	25	86	520	17	12	67	499	1275	9	3	3	63	4	35	75	7	199	35	17	33	30	4	32	84	804	37	1076	2
LOC116915905	4	7	16	17	20	25	33	2	124	4	42	11	25	3	22	11	8	57	183	4	21	7	24	143	2	4	11	124	340	2	4	1	17	2	26	32	3	87	9	23	35	17	2	8	19	226	10	349	2
LOC116915906	3	6	17	11	10	30	13	5	95	0	17	20	17	9	17	24	9	37	150	3	6	11	17	180	11	8	39	240	515	8	7	7	28	11	11	28	3	103	20	14	27	13	30	29	38	299	59	529	3
LOC116915907	7	0	0	0	3	2	30	2	44	2	9	0	17	0	1	0	0	2	31	4	13	2	4	28	0	0	0	10	61	0	0	0	2	0	4	3	0	9	3	6	3	1	0	0	0	2	2	17	0
LOC116915908	6	30	17	21	22	27	18	5	146	12	21	20	29	4	24	22	8	41	181	10	32	9	21	254	12	3	22	108	471	11	8	11	26	8	13	15	2	94	15	15	24	17	1	16	24	217	22	351	4
LOC116915909	0	3	2	10	21	12	55	8	111	1	38	5	8	15	26	21	10	69	193	2	8	2	15	87	5	19	23	195	356	0	1	0	16	3	7	48	16	91	9	7	14	24	2	9	31	282	18	396	0
LOC116915910	29	48	93	51	212	260	544	26	1263	10	225	94	353	50	222	133	76	360	1523	26	136	80	266	1897	35	28	235	1538	4241	61	26	27	204	20	188	261	4	791	172	61	163	57	112	138	233	2540	244	3720	12
LOC116915911	18	26	62	39	215	241	151	13	765	11	106	49	123	41	197	90	72	195	884	15	61	67	137	1545	26	23	216	1717	3807	51	11	20	184	18	63	232	9	588	96	20	80	42	39	163	301	2093	179	3013	9
LOC116915912	2	24	23	5	21	26	11	0	112	13	54	24	36	1	37	14	2	29	210	20	54	18	30	204	3	1	10	98	438	26	7	3	21	1	24	17	3	102	40	34	62	12	4	12	22	34	10	230	2
LOC116915914	1	4	6	5	67	106	43	10	242	2	26	11	28	11	51	20	16	51	216	4	16	25	50	618	13	4	75	533	1338	5	2	6	74	1	20	89	5	202	24	10	23	2	11	31	77	672	42	892	0
LOC116915916	0	0	0	0	0	2	1	0	3	0	0	0	1	0	0	0	1	0	2	0	0	0	0	1	0	1	0	4	6	0	0	0	1	0	1	0	1	3	0	0	0	0	0	0	0	0	0	0	0
LOC116915917	9	32	43	37	58	67	160	15	421	4	163	26	78	5	88	86	33	157	640	15	56	22	67	424	18	32	48	401	1083	13	2	3	74	23	41	100	23	279	58	44	62	59	1	9	78	668	32	1011	5
LOC116915918	6	19	54	19	61	109	60	11	339	4	48	31	69	20	72	31	19	112	406	14	63	50	52	603	11	6	64	439	1302	43	26	9	77	21	52	73	2	303	68	27	91	34	20	65	67	614	130	1116	13
LOC116915919	0	0	0	0	0	0	0	0	0	0	0	1	1	0	0	0	0	1	3	1	0	0	1	0	0	0	1	2	5	0	0	0	0	0	0	1	0	1	1	0	2	0	0	0	1	0	0	4	0
LOC116915920	10	4	1	0	4	1	6	1	27	2	23	2	9	1	4	3	0	4	48	4	11	0	3	16	0	0	6	1	41	3	0	0	2	0	5	5	0	15	17	10	2	5	1	0	4	7	2	48	0
LOC116915921	25	48	63	33	114	138	137	8	566	21	141	58	126	39	134	70	34	177	800	40	87	40	136	1020	50	33	94	726	2226	40	20	15	120	8	80	130	3	416	98	45	101	41	16	33	114	838	71	1357	11
LOC116915922	18	43	86	61	211	281	243	27	970	21	180	51	218	27	219	36	58	373	1183	36	84	96	194	1671	56	22	220	970	3349	64	13	11	336	12	234	263	1	934	179	55	206	70	24	98	116	1917	236	2901	9
LOC116915923	9	13	25	10	38	55	241	1	392	9	57	20	120	1	42	9	17	65	340	4	32	17	30	510	6	7	33	515	1154	14	2	1	68	4	78	58	2	227	32	14	45	5	8	30	30	662	38	864	2
LOC116915925	35	75	547	111	105	130	883	52	1938	63	161	93	1346	136	414	79	191	232	2715	55	231	76	222	2340	146	182	408	4578	8238	74	44	55	1358	161	1493	1595	38	4818	91	101	142	248	260	545	130	5563	172	7252	52
LOC116915926	37	74	204	79	302	352	344	28	1420	44	417	121	542	64	391	165	59	507	2310	77	348	150	442	3644	39	15	222	1643	6580	88	65	26	313	41	246	226	8	1013	349	141	276	103	43	82	266	1651	284	3195	23
LOC116915927	2	0	6	5	8	9	13	0	43	3	15	7	14	0	9	7	0	10	65	7	6	3	13	52	1	1	5	27	115	1	0	1	7	0	5	8	0	22	3	4	12	3	2	2	3	41	6	76	0
LOC116915928	2	2	13	2	5	15	3	1	43	0	12	13	6	0	8	9	2	15	65	0	2	4	4	83	2	2	3	38	138	3	1	0	11	1	6	9	0	31	8	4	8	5	0	4	6	38	7	80	0
LOC116915929	16	21	36	16	11	20	8	4	132	16	36	43	21	25	23	10	4	16	194	15	27	13	8	95	11	5	9	61	244	25	25	24	13	4	12	13	0	116	12	25	41	14	21	8	8	137	23	289	5
LOC116915930	37	35	39	56	235	204	263	13	882	22	199	21	138	32	117	75	63	183	850	27	107	46	211	1007	43	34	98	771	2344	26	7	12	133	18	108	169	6	479	52	29	83	65	25	62	136	1315	103	1870	22
LOC116915932	0	0	6	0	5	2	0	0	13	0	9	1	5	0	8	11	1	34	69	0	4	2	4	89	2	0	6	21	128	1	0	3	10	0	9	11	2	36	3	2	0	0	0	2	12	63	12	94	0
LOC116915933	11	11	33	10	126	146	82	13	432	18	85	27	81	11	118	43	31	107	521	12	39	25	79	879	11	1	111	1081	2238	15	6	9	103	12	29	128	0	302	67	23	47	22	24	101	141	1250	84	1759	2
LOC116915934	0	0	21	1	3	1	53	2	81	0	2	1	25	1	28	0	8	55	120	0	23	5	13	198	1	0	63	240	543	5	0	1	88	0	65	137	0	296	1	1	0	1	31	91	19	289	62	495	1
LOC116915937	0	0	2	0	0	0	0	2	4	0	0	0	0	0	0	0	0	0	0	0	0	0	0	2	1	0	2	6	11	0	0	0	0	0	1	0	0	1	0	0	0	0	0	0	4	6	3	13	0
LOC116915938	8	33	207	40	28	25	82	17	440	34	72	80	138	72	83	166	42	434	1121	37	104	69	31	597	22	30	344	906	2140	96	49	30	186	57	100	271	14	803	97	78	113	106	83	142	215	2098	530	3462	13
LOC116915939	21	60	369	20	249	400	42	23	1184	40	309	210	513	46	358	47	15	110	1648	15	404	374	264	3983	53	0	28	311	5432	280	33	8	280	31	314	65	0	1011	384	85	511	39	147	89	21	347	109	1732	13
LOC116915940	2	5	20	1	15	43	9	0	95	3	22	14	24	3	40	4	5	15	130	6	14	23	3	274	5	0	3	35	363	13	3	4	31	0	13	5	0	69	25	2	29	0	22	22	4	34	5	143	1
LOC116915941	0	0	0	0	0	0	0	0	0	0	0	0	1	0	0	0	0	1	2	0	0	0	0	1	0	0	0	0	1	0	0	0	0	0	1	0	0	1	0	0	0	0	0	0	0	1	0	1	0
LOC116915944	2	0	0	0	1	1	0	0	4	0	0	0	0	0	0	0	0	0	0	0	0	0	0	3	1	0	0	2	6	0	0	0	0	0	2	0	0	2	0	0	0	0	0	0	0	3	0	3	0
LOC116915946	40	53	51	39	102	118	150	13	566	36	186	67	138	13	82	54	21	139	736	59	130	38	106	764	18	12	75	458	1660	36	33	15	88	23	89	82	6	372	75	67	95	58	4	40	98	713	77	1227	2
LOC116915947	2	1	2	0	2	1	0	0	8	0	2	3	1	0	1	0	0	0	7	0	2	1	1	2	2	0	0	0	8	0	0	0	0	1	0	1	0	2	0	2	2	0	0	1	0	0	0	5	0
LOC116915948	3	8	19	4	12	11	16	3	76	6	13	18	19	9	11	18	2	16	112	3	11	5	6	85	12	2	18	66	208	6	7	2	19	2	5	8	0	49	10	9	24	7	8	7	6	143	22	236	2
LOC116915949	21	34	81	42	90	79	188	6	541	17	92	50	70	38	74	151	67	171	730	32	55	39	51	698	31	23	142	1232	2303	47	43	29	89	26	38	150	13	435	72	29	78	29	19	84	175	1912	161	2559	8
LOC116915951	0	1	0	0	3	1	5	0	10	0	1	0	4	2	0	4	1	0	12	0	1	1	2	6	0	1	1	4	16	0	0	0	4	0	0	0	0	4	1	1	1	1	0	0	1	3	1	9	0
LOC116915953	0	5	15	2	19	32	20	6	99	8	22	10	16	12	31	28	24	52	203	7	16	18	18	236	3	10	60	281	649	3	2	1	20	0	18	53	3	100	23	6	34	7	14	27	38	386	62	597	4
LOC116915955	29	87	94	95	190	253	147	39	934	33	203	145	129	63	217	134	67	212	1203	35	75	119	156	1661	83	45	152	1189	3515	64	30	24	180	45	100	198	31	672	123	53	167	64	23	132	216	1844	190	2812	15
LOC116915956	0	0	4	3	0	16	1	1	25	2	10	13	16	0	4	4	0	3	52	2	5	1	5	43	0	0	2	9	67	4	0	0	4	0	4	1	0	13	3	5	5	0	2	10	1	9	1	36	3
LOC116915957	8	4	16	2	25	29	31	0	115	10	57	15	41	5	31	7	8	37	211	11	17	6	25	173	3	3	10	83	331	5	6	1	20	1	26	14	0	73	13	28	41	10	1	7	20	115	9	244	1
LOC116915958	100	94	199	50	152	203	203	18	1019	56	296	94	299	59	137	72	30	98	1141	71	256	79	114	1380	55	12	63	458	2488	99	61	41	154	46	201	107	8	717	114	182	214	70	40	74	69	750	112	1625	64
LOC116915959	160	423	1351	603	1146	1778	1740	224	7425	211	1151	1363	1927	451	1726	1126	420	2436	10811	191	729	851	884	12408	377	153	2042	11006	28641	719	328	175	2358	446	1594	1920	86	7626	1033	603	1364	632	1371	2121	1511	15290	2618	26543	174
LOC116915960	2	7	7	17	21	26	71	3	154	2	27	11	12	19	32	30	28	43	204	3	14	5	16	184	5	16	63	388	694	9	2	1	39	11	5	41	6	114	14	6	16	7	22	25	71	820	48	1029	0
LOC116915961	8	20	52	33	144	150	119	11	537	14	94	27	98	9	110	60	30	140	582	7	45	29	121	1114	13	13	84	667	2093	17	10	2	98	5	63	113	0	308	88	27	64	43	6	31	104	956	74	1393	11
LOC116915962	6	10	14	3	43	66	95	2	239	4	44	21	56	3	53	17	18	77	293	15	31	15	59	448	8	3	50	426	1055	6	2	3	39	5	20	43	0	118	33	28	35	15	3	24	62	575	39	814	8
LOC116915963	82	140	283	133	407	547	645	59	2296	111	579	325	710	130	557	292	133	796	3633	143	296	211	541	4513	104	53	534	2829	9224	210	64	59	563	97	427	521	19	1960	439	269	579	183	196	332	415	3944	538	6895	34
[truncated: 16,786 more rows]
[truncated: 27 more columns]
